# Supplementary material for: Qualitative Proteome-Wide Analysis Reveals the Diverse Functions of Lysine Crotonylation in Dendrobium huoshanense
Source: Front Plant Sci. 2022 Feb 16;13:822374. doi: 10.3389/fpls.2022.822374 (PMC8888884; doi:10.3389/fpls.2022.822374)
Supplement: Supplementary file 2 [file Table_1.XLSX]

## Sheet: Summary
Header line description of table 1			Table 1. MS/MS spectrum database search analysis summary
Total spectrums	Number of spectrums produced by mass spectrometer
Matched spectrums	Number of spectrums matched with alignment protein		Total spectrums	Matched spectrums	Peptides	Modified peptides	Identified proteins	Identified sites
Peptides	Number of peptides which spectrums hit		69323	16725 (24.1%)	13765	4695	1591	4726
Modified peptides	Total number of modified peptides identified
Identified proteins	Number of proteins detected by spectrum search analysis
Identified sites	Number of modification sites detected by spectrum search analysis
Header line description of worksheet "Ident"
Protein accession	Protein accession number of database used for search
Position	Modification site localization in protein
Amino acid	The amino acid that modification site modified
Protein description	Protein functional description
Gene name	Indicates the name of the gene that code for the protein sequence
Localization probability	Probability of a certain amino acid containing this modification in this peptide
PEP	The maximal posterior error probability for peptides
Score	A simple rule to be used to judge whether a result is significant or not
Modified sequence	Identified peptide sequence marked with modification sites localization probabilities
Charge	Carried charge of peptide
Mass error [ppm]	Parts per million ratio of peptide mass error between the theory and practice
MS/MS Count	Number of spectrum matched with peptide
Header line description of worksheet "pep_ident"
ID	Identified peptide index number
Sequence	Identified peptide amino acid sequence
Length	Identified peptide amino acid length
Modifications	identified peptide with modification markers
Modified sequence	Identified peptide sequence marked with modification sites localization probabilities
Protein accession	Protein accession number of database used for search
Protein description	Protein functional description
Charge	Carried charge of peptide
m/z	Mass-to-charge ratio of peptide
Mass error [ppm]	Parts per million ratio of peptide mass error between the theory and practice
PEP	The maximal posterior error probability for peptides
Score	A simple rule to be used to judge whether a result is significant or not
MS/MS Count	Number of spectrum matched with peptide

## Sheet: Quant
Protein accession	Position	Amino acid	Protein description	Localization probability	PEP	Score	Modified sequence	Charge	Mass error [ppm]	MS/MS Count
TRINITY_DN100000_c0_g1_m.1	103	K	TRINITY_DN100000_c0_g1|g.1 ORF TRINITY_DN100000_c0_g1|g.1 TRINITY_DN100000_c0_g1_m.1 type:complete len:446 (+) TRINITY_DN100000_c0_g1:98-1435(+)	1	0.00579866	74.486	SK(1)VDDLR	2	-0.16887	1
TRINITY_DN100000_c0_g1_m.1	418	K	TRINITY_DN100000_c0_g1|g.1 ORF TRINITY_DN100000_c0_g1|g.1 TRINITY_DN100000_c0_g1_m.1 type:complete len:446 (+) TRINITY_DN100000_c0_g1:98-1435(+)	1	0.00658958	61.48	MK(1)VTQVDFK	2	0.87541	1
TRINITY_DN100000_c0_g1_m.1	91	K	TRINITY_DN100000_c0_g1|g.1 ORF TRINITY_DN100000_c0_g1|g.1 TRINITY_DN100000_c0_g1_m.1 type:complete len:446 (+) TRINITY_DN100000_c0_g1:98-1435(+)	0.998407	0.00147268	46.068	LK(0.998)PHEDK(0.002)NEEDR	3	0.52218	1
TRINITY_DN100000_c0_g1_m.1	425	K	TRINITY_DN100000_c0_g1|g.1 ORF TRINITY_DN100000_c0_g1|g.1 TRINITY_DN100000_c0_g1_m.1 type:complete len:446 (+) TRINITY_DN100000_c0_g1:98-1435(+)	1	0.02513	58.286	VTQVDFK(1)K	2	-1.1828	1
TRINITY_DN100025_c1_g9_m.49	188	K	TRINITY_DN100025_c1_g9|g.49 ORF TRINITY_DN100025_c1_g9|g.49 TRINITY_DN100025_c1_g9_m.49 type:complete len:262 (+) TRINITY_DN100025_c1_g9:132-917(+)	1	0.00702904	87.251	AGNAYHK(1)YR	2	3.4349	1
TRINITY_DN100032_c1_g3_m.64	139	K	TRINITY_DN100032_c1_g3|g.64 ORF TRINITY_DN100032_c1_g3|g.64 TRINITY_DN100032_c1_g3_m.64 type:complete len:410 (+) TRINITY_DN100032_c1_g3:132-1361(+)	1	0.00054429	117.18	HQQK(1)LLLR	2	0.35089	1
TRINITY_DN100032_c1_g3_m.64	222	K	TRINITY_DN100032_c1_g3|g.64 ORF TRINITY_DN100032_c1_g3|g.64 TRINITY_DN100032_c1_g3_m.64 type:complete len:410 (+) TRINITY_DN100032_c1_g3:132-1361(+)	1	0.00257737	52.662	AFVDSGAQSTIISK(1)GCAER	2	-3.1994	1
TRINITY_DN100034_c0_g1_m.66	239	K	TRINITY_DN100034_c0_g1|g.66 ORF TRINITY_DN100034_c0_g1|g.66 TRINITY_DN100034_c0_g1_m.66 type:complete len:385 (+) TRINITY_DN100034_c0_g1:145-1299(+)	1	8.24095e-06	83.474	DPSK(1)LDEYGCVSSHNR	2	-2.9877	1
TRINITY_DN100036_c0_g1_m.69	246	K	TRINITY_DN100036_c0_g1|g.69 ORF TRINITY_DN100036_c0_g1|g.69 TRINITY_DN100036_c0_g1_m.69 type:5prime_partial len:475 (+) TRINITY_DN100036_c0_g1:3-1427(+)	1	0.000351719	75.474	FAK(1)EVHVASR	2	-1.5129	1
TRINITY_DN100046_c0_g1_m.79	124	K	TRINITY_DN100046_c0_g1|g.79 ORF TRINITY_DN100046_c0_g1|g.79 TRINITY_DN100046_c0_g1_m.79 type:complete len:1025 (+) TRINITY_DN100046_c0_g1:238-3312(+)	1	1.06133e-12	137.39	FDAGLTESQMTDHMK(1)R	3	-0.2686	2
TRINITY_DN100046_c0_g1_m.79	778	K	TRINITY_DN100046_c0_g1|g.79 ORF TRINITY_DN100046_c0_g1|g.79 TRINITY_DN100046_c0_g1_m.79 type:complete len:1025 (+) TRINITY_DN100046_c0_g1:238-3312(+)	1	7.9052e-05	70.806	TFCIPHGGGGPGMGPIGVK(1)K	3	-3.9567	1
TRINITY_DN100046_c0_g1_m.79	445	K	TRINITY_DN100046_c0_g1|g.79 ORF TRINITY_DN100046_c0_g1|g.79 TRINITY_DN100046_c0_g1_m.79 type:complete len:1025 (+) TRINITY_DN100046_c0_g1:238-3312(+)	1	0.000298977	62.398	LGTVDVQELPFFDTVK(1)VK	2	3.4869	1
TRINITY_DN100046_c0_g1_m.79	363	K	TRINITY_DN100046_c0_g1|g.79 ORF TRINITY_DN100046_c0_g1|g.79 TRINITY_DN100046_c0_g1_m.79 type:complete len:1025 (+) TRINITY_DN100046_c0_g1:238-3312(+)	1	2.15481e-07	145.95	IIGVSLDSSGK(1)PALR	2	-1.9676	1
TRINITY_DN100046_c0_g1_m.79	879	K	TRINITY_DN100046_c0_g1|g.79 ORF TRINITY_DN100046_c0_g1|g.79 TRINITY_DN100046_c0_g1_m.79 type:complete len:1025 (+) TRINITY_DN100046_c0_g1:238-3312(+)	1	1.57796e-06	108.91	GFK(1)QTAGIEAEDVAK	2	-3.3508	1
TRINITY_DN100046_c0_g1_m.79	891	K	TRINITY_DN100046_c0_g1|g.79 ORF TRINITY_DN100046_c0_g1|g.79 TRINITY_DN100046_c0_g1_m.79 type:complete len:1025 (+) TRINITY_DN100046_c0_g1:238-3312(+)	1	4.21918e-16	176.97	QTAGIEAEDVAK(1)R	2	-3.1331	1
TRINITY_DN100046_c0_g1_m.79	678	K	TRINITY_DN100046_c0_g1|g.79 ORF TRINITY_DN100046_c0_g1|g.79 TRINITY_DN100046_c0_g1_m.79 type:complete len:1025 (+) TRINITY_DN100046_c0_g1:238-3312(+)	1	6.88712e-14	120.75	IVSVGTDSK(1)GNINIEEVR	2	-2.2185	1
TRINITY_DN100046_c0_g1_m.79	945	K	TRINITY_DN100046_c0_g1|g.79 ORF TRINITY_DN100046_c0_g1|g.79 TRINITY_DN100046_c0_g1_m.79 type:complete len:1025 (+) TRINITY_DN100046_c0_g1:238-3312(+)	1	4.29914e-08	126.48	EIENGK(1)ADINNNVLK	2	-1.0608	1
TRINITY_DN100051_c4_g1_m.86	230	K	TRINITY_DN100051_c4_g1|g.86 ORF TRINITY_DN100051_c4_g1|g.86 TRINITY_DN100051_c4_g1_m.86 type:5prime_partial len:238 (+) TRINITY_DN100051_c4_g1:1-714(+)	1	6.88633e-08	119.52	SLLQALQK(1)SLEIAR	2	2.6284	1
TRINITY_DN100064_c0_g1_m.96	1053	K	TRINITY_DN100064_c0_g1|g.96 ORF TRINITY_DN100064_c0_g1|g.96 TRINITY_DN100064_c0_g1_m.96 type:complete len:1193 (+) TRINITY_DN100064_c0_g1:325-3903(+)	1	0.00883614	64.064	EVLHK(1)VGAER	2	-0.67928	1
TRINITY_DN100066_c0_g1_m.99	48	K	TRINITY_DN100066_c0_g1|g.99 ORF TRINITY_DN100066_c0_g1|g.99 TRINITY_DN100066_c0_g1_m.99 type:complete len:332 (+) TRINITY_DN100066_c0_g1:35-1030(+)	1	0.000494185	87.942	IVNTK(1)SNVGANR	2	0.33923	1
TRINITY_DN100080_c0_g1_m.120	318	K	TRINITY_DN100080_c0_g1|g.120 ORF TRINITY_DN100080_c0_g1|g.120 TRINITY_DN100080_c0_g1_m.120 type:complete len:401 (+) TRINITY_DN100080_c0_g1:95-1297(+)	1	0.000146939	66.509	LCAQAAGLEAK(1)IIHYDPK	3	-0.67715	1
TRINITY_DN100080_c0_g1_m.120	325	K	TRINITY_DN100080_c0_g1|g.120 ORF TRINITY_DN100080_c0_g1|g.120 TRINITY_DN100080_c0_g1_m.120 type:complete len:401 (+) TRINITY_DN100080_c0_g1:95-1297(+)	1	2.69076e-05	91.939	IIHYDPK(1)SVGVDAK	2	-1.9088	2
TRINITY_DN100081_c0_g1_m.121	535	K	TRINITY_DN100081_c0_g1|g.121 ORF TRINITY_DN100081_c0_g1|g.121 TRINITY_DN100081_c0_g1_m.121 type:complete len:630 (+) TRINITY_DN100081_c0_g1:237-2126(+)	1	0.00219563	65.408	AWESFHDVK(1)ISDR	2	-2.2052	1
TRINITY_DN100081_c0_g1_m.121	319	K	TRINITY_DN100081_c0_g1|g.121 ORF TRINITY_DN100081_c0_g1|g.121 TRINITY_DN100081_c0_g1_m.121 type:complete len:630 (+) TRINITY_DN100081_c0_g1:237-2126(+)	1	0.0180236	67.548	YAPTAK(1)DLASR	2	-1.9904	1
TRINITY_DN100081_c0_g1_m.121	602	K	TRINITY_DN100081_c0_g1|g.121 ORF TRINITY_DN100081_c0_g1|g.121 TRINITY_DN100081_c0_g1_m.121 type:complete len:630 (+) TRINITY_DN100081_c0_g1:237-2126(+)	1	4.65104e-05	81.799	HSLGYWENEK(1)VR	2	-0.81129	1
TRINITY_DN100081_c0_g1_m.121	526	K	TRINITY_DN100081_c0_g1|g.121 ORF TRINITY_DN100081_c0_g1|g.121 TRINITY_DN100081_c0_g1_m.121 type:complete len:630 (+) TRINITY_DN100081_c0_g1:237-2126(+)	1	0.000623401	89.382	LIDK(1)AWESFHDVK	2	-2.3045	1
TRINITY_DN100081_c0_g1_m.121	234	K	TRINITY_DN100081_c0_g1|g.121 ORF TRINITY_DN100081_c0_g1|g.121 TRINITY_DN100081_c0_g1_m.121 type:complete len:630 (+) TRINITY_DN100081_c0_g1:237-2126(+)	1	0.00392377	83.474	FSAK(1)STILATGGYGR	2	-0.47171	1
TRINITY_DN100081_c0_g1_m.121	165	K	TRINITY_DN100081_c0_g1|g.121 ORF TRINITY_DN100081_c0_g1|g.121 TRINITY_DN100081_c0_g1_m.121 type:complete len:630 (+) TRINITY_DN100081_c0_g1:237-2126(+)	1	2.01956e-06	85.813	AFGGQSLNFGK(1)GGQAYR	2	-2.6951	1
TRINITY_DN100081_c0_g1_m.121	522	K	TRINITY_DN100081_c0_g1|g.121 ORF TRINITY_DN100081_c0_g1|g.121 TRINITY_DN100081_c0_g1_m.121 type:complete len:630 (+) TRINITY_DN100081_c0_g1:237-2126(+)	1	1.83717e-08	108.91	TQETLEEGCK(1)LIDK	2	-2.7643	1
TRINITY_DN100081_c0_g1_m.121	150	K	TRINITY_DN100081_c0_g1|g.121 ORF TRINITY_DN100081_c0_g1|g.121 TRINITY_DN100081_c0_g1_m.121 type:complete len:630 (+) TRINITY_DN100081_c0_g1:237-2126(+)	1	0.000127346	117.39	TEDGK(1)IYQR	2	0.46053	1
TRINITY_DN100082_c2_g1_m.124	177	K	TRINITY_DN100082_c2_g1|g.124 ORF TRINITY_DN100082_c2_g1|g.124 TRINITY_DN100082_c2_g1_m.124 type:complete len:190 (+) TRINITY_DN100082_c2_g1:247-816(+)	1	5.36766e-17	163.09	SVQAANK(1)EAEEQDR	2	-0.86113	1
TRINITY_DN100098_c1_g2_m.152	535	K	TRINITY_DN100098_c1_g2|g.152 ORF TRINITY_DN100098_c1_g2|g.152 TRINITY_DN100098_c1_g2_m.152 type:complete len:573 (+) TRINITY_DN100098_c1_g2:108-1826(+)	1	0.00912211	62.969	QEATIAK(1)TR	2	0.16826	1
TRINITY_DN100109_c0_g2_m.169	106	K	TRINITY_DN100109_c0_g2|g.169 ORF TRINITY_DN100109_c0_g2|g.169 TRINITY_DN100109_c0_g2_m.169 type:5prime_partial len:183 (+) TRINITY_DN100109_c0_g2:1-549(+)	1	0.000765507	66.664	YGDIDDLK(1)GIQVHR	3	-3.0622	1
TRINITY_DN100110_c0_g2_m.171	246	K	TRINITY_DN100110_c0_g2|g.171 ORF TRINITY_DN100110_c0_g2|g.171 TRINITY_DN100110_c0_g2_m.171 type:complete len:325 (+) TRINITY_DN100110_c0_g2:93-1067(+)	1	0.00377678	72.038	AK(1)EVITNR	2	0.15663	1
TRINITY_DN100123_c0_g1_m.199	131	K	TRINITY_DN100123_c0_g1|g.199 ORF TRINITY_DN100123_c0_g1|g.199 TRINITY_DN100123_c0_g1_m.199 type:complete len:441 (+) TRINITY_DN100123_c0_g1:258-1580(+)	1	0.000788531	104.39	EK(1)GAVTQIK	2	-0.33289	1
TRINITY_DN100126_c0_g1_m.201	307	K	TRINITY_DN100126_c0_g1|g.201 ORF TRINITY_DN100126_c0_g1|g.201 TRINITY_DN100126_c0_g1_m.201 type:complete len:481 (+) TRINITY_DN100126_c0_g1:290-1732(+)	1	0.00234772	79.059	INDYQK(1)SR	2	2.1235	1
TRINITY_DN100127_c0_g1_m.202	314	K	TRINITY_DN100127_c0_g1|g.202 ORF TRINITY_DN100127_c0_g1|g.202 TRINITY_DN100127_c0_g1_m.202 type:complete len:528 (+) TRINITY_DN100127_c0_g1:262-1845(+)	1	0.0225324	76.833	FK(1)QYHQK	2	2.0937	1
TRINITY_DN100128_c1_g1_m.206	22	K	TRINITY_DN100128_c1_g1|g.206 ORF TRINITY_DN100128_c1_g1|g.206 TRINITY_DN100128_c1_g1_m.206 type:complete len:225 (+) TRINITY_DN100128_c1_g1:1005-1679(+)	1	0.00460393	79.059	TVK(1)ENLSK	2	1.5643	1
TRINITY_DN100156_c5_g1_m.262	218	K	TRINITY_DN100156_c5_g1|g.262 ORF TRINITY_DN100156_c5_g1|g.262 TRINITY_DN100156_c5_g1_m.262 type:complete len:332 (+) TRINITY_DN100156_c5_g1:89-1084(+)	1	0.00529466	72.492	EMMYHK(1)VK	2	-1.3367	1
TRINITY_DN100181_c0_g1_m.296	52	K	TRINITY_DN100181_c0_g1|g.296 ORF TRINITY_DN100181_c0_g1|g.296 TRINITY_DN100181_c0_g1_m.296 type:complete len:278 (+) TRINITY_DN100181_c0_g1:125-958(+)	1	0.0314882	54.056	TTAGK(1)LR	2	1.3601	1
TRINITY_DN100196_c0_g1_m.318	197	K	TRINITY_DN100196_c0_g1|g.318 ORF TRINITY_DN100196_c0_g1|g.318 TRINITY_DN100196_c0_g1_m.318 type:complete len:344 (+) TRINITY_DN100196_c0_g1:84-1115(+)	1	0.00156176	86.838	SK(1)FSFDEAFNYK	2	-0.15721	1
TRINITY_DN100196_c0_g1_m.318	207	K	TRINITY_DN100196_c0_g1|g.318 ORF TRINITY_DN100196_c0_g1|g.318 TRINITY_DN100196_c0_g1_m.318 type:complete len:344 (+) TRINITY_DN100196_c0_g1:84-1115(+)	1	0.000222605	112.8	FSFDEAFNYK(1)K	2	-1.6892	1
TRINITY_DN100196_c0_g1_m.318	9	K	TRINITY_DN100196_c0_g1|g.318 ORF TRINITY_DN100196_c0_g1|g.318 TRINITY_DN100196_c0_g1_m.318 type:complete len:344 (+) TRINITY_DN100196_c0_g1:84-1115(+)	1	0.00897356	57.293	VVLK(1)NYVSGFPK	2	-2.0071	1
TRINITY_DN100197_c1_g2_m.321	105	K	TRINITY_DN100197_c1_g2|g.321 ORF TRINITY_DN100197_c1_g2|g.321 TRINITY_DN100197_c1_g2_m.321 type:5prime_partial len:136 (+) TRINITY_DN100197_c1_g2:3-410(+)	1	1.44158e-12	156.73	SVDAAK(1)EALPEAEK	2	-1.4714	1
TRINITY_DN100197_c1_g2_m.321	113	K	TRINITY_DN100197_c1_g2|g.321 ORF TRINITY_DN100197_c1_g2|g.321 TRINITY_DN100197_c1_g2_m.321 type:5prime_partial len:136 (+) TRINITY_DN100197_c1_g2:3-410(+)	1	0.000129199	79.889	EALPEAEK(1)LVEFR	2	0.95079	1
TRINITY_DN100201_c1_g1_m.332	958	K	TRINITY_DN100201_c1_g1|g.332 ORF TRINITY_DN100201_c1_g1|g.332 TRINITY_DN100201_c1_g1_m.332 type:complete len:1806 (+) TRINITY_DN100201_c1_g1:162-5579(+)	1	0.00794218	57.888	SSQSSYHK(1)FR	2	-1.7311	1
TRINITY_DN100208_c0_g1_m.344	392	K	TRINITY_DN100208_c0_g1|g.344 ORF TRINITY_DN100208_c0_g1|g.344 TRINITY_DN100208_c0_g1_m.344 type:complete len:599 (+) TRINITY_DN100208_c0_g1:185-1981(+)	1	9.51037e-06	112.7	TSEVAEK(1)GTITTR	2	-3.2217	1
TRINITY_DN100208_c0_g1_m.344	78	K	TRINITY_DN100208_c0_g1|g.344 ORF TRINITY_DN100208_c0_g1|g.344 TRINITY_DN100208_c0_g1_m.344 type:complete len:599 (+) TRINITY_DN100208_c0_g1:185-1981(+)	1	0.0636744	42.229	ETHAK(1)IR	2	-0.1598	1
TRINITY_DN100242_c0_g1_m.405	248	K	TRINITY_DN100242_c0_g1|g.405 ORF TRINITY_DN100242_c0_g1|g.405 TRINITY_DN100242_c0_g1_m.405 type:complete len:269 (+) TRINITY_DN100242_c0_g1:89-895(+)	1	3.29085e-05	81.799	TISIVDNELAVK(1)R	2	3.4148	1
TRINITY_DN100270_c1_g1_m.453	300	K	TRINITY_DN100270_c1_g1|g.453 ORF TRINITY_DN100270_c1_g1|g.453 TRINITY_DN100270_c1_g1_m.453 type:5prime_partial len:469 (+) TRINITY_DN100270_c1_g1:3-1409(+)	1	0.0101295	56.378	MAK(1)QAMER	2	0.93315	1
TRINITY_DN100270_c1_g1_m.453	55	K	TRINITY_DN100270_c1_g1|g.453 ORF TRINITY_DN100270_c1_g1|g.453 TRINITY_DN100270_c1_g1_m.453 type:5prime_partial len:469 (+) TRINITY_DN100270_c1_g1:3-1409(+)	1	4.80171e-05	85.821	GEPPSVVALAK(1)WR	2	0.39167	1
TRINITY_DN100329_c0_g2_m.571	282	K	TRINITY_DN100329_c0_g2|g.571 ORF TRINITY_DN100329_c0_g2|g.571 TRINITY_DN100329_c0_g2_m.571 type:internal len:301 (+) TRINITY_DN100329_c0_g2:3-902(+)	1	2.42853e-08	114.93	HYK(1)GEHTYVPVTLK	3	1.7102	2
TRINITY_DN100329_c0_g2_m.571	264	K	TRINITY_DN100329_c0_g2|g.571 ORF TRINITY_DN100329_c0_g2|g.571 TRINITY_DN100329_c0_g2_m.571 type:internal len:301 (+) TRINITY_DN100329_c0_g2:3-902(+)	1	6.88712e-14	112.68	NSK(1)DGEGGELVFGGSDPK	2	-1.8267	1
TRINITY_DN100340_c1_g1_m.591	318	K	TRINITY_DN100340_c1_g1|g.591 ORF TRINITY_DN100340_c1_g1|g.591 TRINITY_DN100340_c1_g1_m.591 type:3prime_partial len:355 (+) TRINITY_DN100340_c1_g1:296-1357(+)	1	1.40058e-11	175.64	GFVASNSK(1)DDPAR	2	-1.12	1
TRINITY_DN100355_c2_g1_m.611	324	K	TRINITY_DN100355_c2_g1|g.611 ORF TRINITY_DN100355_c2_g1|g.611 TRINITY_DN100355_c2_g1_m.611 type:complete len:443 (+) TRINITY_DN100355_c2_g1:135-1463(+)	1	1.05463e-18	175.68	MSTK(1)EVDEQIINVQNK	2	-3.3067	1
TRINITY_DN100377_c0_g1_m.647	219	K	TRINITY_DN100377_c0_g1|g.647 ORF TRINITY_DN100377_c0_g1|g.647 TRINITY_DN100377_c0_g1_m.647 type:complete len:318 (+) TRINITY_DN100377_c0_g1:116-1069(+)	1	3.16176e-08	98.865	TLNK(1)DPDPANPIEGK	2	-4.1266	1
TRINITY_DN100377_c0_g1_m.647	230	K	TRINITY_DN100377_c0_g1|g.647 ORF TRINITY_DN100377_c0_g1|g.647 TRINITY_DN100377_c0_g1_m.647 type:complete len:318 (+) TRINITY_DN100377_c0_g1:116-1069(+)	1	0.000182504	97.949	TLNKDPDPANPIEGK(1)EER	3	1.0158	1
TRINITY_DN100380_c1_g1_m.653	70	K	TRINITY_DN100380_c1_g1|g.653 ORF TRINITY_DN100380_c1_g1|g.653 TRINITY_DN100380_c1_g1_m.653 type:3prime_partial len:475 (+) TRINITY_DN100380_c1_g1:237-1658(+)	1	3.31884e-13	195.3	NTLDAK(1)EQHR	2	-0.36998	1
TRINITY_DN100408_c0_g1_m.709	178	K	TRINITY_DN100408_c0_g1|g.709 ORF TRINITY_DN100408_c0_g1|g.709 TRINITY_DN100408_c0_g1_m.709 type:complete len:540 (+) TRINITY_DN100408_c0_g1:151-1770(+)	1	0.0293371	40.386	LK(1)VEPLLDK	2	-0.36496	1
TRINITY_DN100419_c0_g1_m.733	493	K	TRINITY_DN100419_c0_g1|g.733 ORF TRINITY_DN100419_c0_g1|g.733 TRINITY_DN100419_c0_g1_m.733 type:complete len:636 (+) TRINITY_DN100419_c0_g1:46-1953(+)	1	0.0231965	66.087	EK(1)TNFVR	2	-1.0302	1
TRINITY_DN100431_c0_g1_m.747	241	K	TRINITY_DN100431_c0_g1|g.747 ORF TRINITY_DN100431_c0_g1|g.747 TRINITY_DN100431_c0_g1_m.747 type:complete len:272 (+) TRINITY_DN100431_c0_g1:147-962(+)	1	0.0353954	53.878	ENLIK(1)SR	2	-0.80603	1
TRINITY_DN100431_c0_g1_m.747	114	K	TRINITY_DN100431_c0_g1|g.747 ORF TRINITY_DN100431_c0_g1|g.747 TRINITY_DN100431_c0_g1_m.747 type:complete len:272 (+) TRINITY_DN100431_c0_g1:147-962(+)	1	1.80602e-12	106.97	VPAFK(1)DENTSLFESR	2	0.37368	1
TRINITY_DN100431_c0_g1_m.747	188	K	TRINITY_DN100431_c0_g1|g.747 ORF TRINITY_DN100431_c0_g1|g.747 TRINITY_DN100431_c0_g1_m.747 type:complete len:272 (+) TRINITY_DN100431_c0_g1:147-962(+)	1	1.63109e-06	157.77	QDSK(1)VIEANER	2	-1.9923	1
TRINITY_DN100431_c0_g1_m.747	199	K	TRINITY_DN100431_c0_g1|g.747 ORF TRINITY_DN100431_c0_g1|g.747 TRINITY_DN100431_c0_g1_m.747 type:complete len:272 (+) TRINITY_DN100431_c0_g1:147-962(+)	1	0.00606496	60.547	LAK(1)VLDVYEQR	2	3.3369	1
TRINITY_DN100431_c0_g1_m.747	140	K	TRINITY_DN100431_c0_g1|g.747 ORF TRINITY_DN100431_c0_g1|g.747 TRINITY_DN100431_c0_g1_m.747 type:complete len:272 (+) TRINITY_DN100431_c0_g1:147-962(+)	1	0.00544769	64.906	YADQGYK(1)GLYGR	2	-2.2349	1
TRINITY_DN100471_c1_g1_m.808	144	K	TRINITY_DN100471_c1_g1|g.808 ORF TRINITY_DN100471_c1_g1|g.808 TRINITY_DN100471_c1_g1_m.808 type:complete len:757 (+) TRINITY_DN100471_c1_g1:22-2292(+)	1	6.5572e-05	115.41	TLQGK(1)EYVQHCR	2	-3.6346	1
TRINITY_DN100471_c1_g1_m.808	507	K	TRINITY_DN100471_c1_g1|g.808 ORF TRINITY_DN100471_c1_g1|g.808 TRINITY_DN100471_c1_g1_m.808 type:complete len:757 (+) TRINITY_DN100471_c1_g1:22-2292(+)	1	0.0029583	65.156	VPISILYK(1)K	2	-3.7545	1
TRINITY_DN100471_c1_g1_m.808	121	K	TRINITY_DN100471_c1_g1|g.808 ORF TRINITY_DN100471_c1_g1|g.808 TRINITY_DN100471_c1_g1_m.808 type:complete len:757 (+) TRINITY_DN100471_c1_g1:22-2292(+)	1	0.00207598	83.775	IK(1)EDDISAPIR	2	-0.58563	1
TRINITY_DN100479_c0_g1_m.827	191	K	TRINITY_DN100479_c0_g1|g.827 ORF TRINITY_DN100479_c0_g1|g.827 TRINITY_DN100479_c0_g1_m.827 type:complete len:320 (+) TRINITY_DN100479_c0_g1:185-1144(+)	1	0.00287286	50.314	FLTYHEPAPILIPK(1)DK	3	-3.7271	1
TRINITY_DN100479_c0_g1_m.827	7	K	TRINITY_DN100479_c0_g1|g.827 ORF TRINITY_DN100479_c0_g1|g.827 TRINITY_DN100479_c0_g1_m.827 type:complete len:320 (+) TRINITY_DN100479_c0_g1:185-1144(+)	1	4.51114e-08	121.67	MEIGTIK(1)HR	2	-1.2963	1
TRINITY_DN100479_c0_g1_m.827	277	K	TRINITY_DN100479_c0_g1|g.827 ORF TRINITY_DN100479_c0_g1|g.827 TRINITY_DN100479_c0_g1_m.827 type:complete len:320 (+) TRINITY_DN100479_c0_g1:185-1144(+)	1	0.0011467	67.881	VQEYVQK(1)GGFK	2	-0.77739	1
TRINITY_DN100479_c0_g1_m.827	223	K	TRINITY_DN100479_c0_g1|g.827 ORF TRINITY_DN100479_c0_g1|g.827 TRINITY_DN100479_c0_g1_m.827 type:complete len:320 (+) TRINITY_DN100479_c0_g1:185-1144(+)	1	0.0386173	46.068	FNK(1)SGFTGGLNYYR	2	1.6765	1
TRINITY_DN100485_c0_g1_m.839	39	K	TRINITY_DN100485_c0_g1|g.839 ORF TRINITY_DN100485_c0_g1|g.839 TRINITY_DN100485_c0_g1_m.839 type:complete len:140 (+) TRINITY_DN100485_c0_g1:204-623(+)	1	0.0286058	43.734	LK(1)QVIVEK	2	-0.98467	1
TRINITY_DN100487_c0_g2_m.846	296	K	TRINITY_DN100487_c0_g2|g.846 ORF TRINITY_DN100487_c0_g2|g.846 TRINITY_DN100487_c0_g2_m.846 type:complete len:713 (+) TRINITY_DN100487_c0_g2:51-2189(+)	1	6.37869e-20	135.89	GK(1)VAADDWQGGEGAPVYR	2	-3.2129	1
TRINITY_DN100491_c0_g1_m.854	913	K	TRINITY_DN100491_c0_g1|g.854 ORF TRINITY_DN100491_c0_g1|g.854 TRINITY_DN100491_c0_g1_m.854 type:5prime_partial len:1083 (+) TRINITY_DN100491_c0_g1:3-3251(+)	1	5.03848e-05	90.142	IDPLGEGAK(1)WR	2	0.50284	1
TRINITY_DN100491_c0_g1_m.854	446	K	TRINITY_DN100491_c0_g1|g.854 ORF TRINITY_DN100491_c0_g1|g.854 TRINITY_DN100491_c0_g1_m.854 type:5prime_partial len:1083 (+) TRINITY_DN100491_c0_g1:3-3251(+)	1	0.00431026	65.313	QLEFLK(1)GR	2	-1.294	1
TRINITY_DN100491_c0_g1_m.854	372	K	TRINITY_DN100491_c0_g1|g.854 ORF TRINITY_DN100491_c0_g1|g.854 TRINITY_DN100491_c0_g1_m.854 type:5prime_partial len:1083 (+) TRINITY_DN100491_c0_g1:3-3251(+)	1	0.0109189	58.916	FIHYVNK(1)DGR	2	-2.0768	2
TRINITY_DN100500_c0_g1_m.867	413	K	TRINITY_DN100500_c0_g1|g.867 ORF TRINITY_DN100500_c0_g1|g.867 TRINITY_DN100500_c0_g1_m.867 type:complete len:531 (+) TRINITY_DN100500_c0_g1:105-1697(+)	1	0.0146945	48.157	LK(1)ELGFGGGK	2	-1.1498	1
TRINITY_DN100500_c0_g1_m.867	272	K	TRINITY_DN100500_c0_g1|g.867 ORF TRINITY_DN100500_c0_g1|g.867 TRINITY_DN100500_c0_g1_m.867 type:complete len:531 (+) TRINITY_DN100500_c0_g1:105-1697(+)	1	0.00453131	51.07	AEGNESLMASDVDQK(1)ALK	2	-5.403	1
TRINITY_DN100500_c0_g1_m.867	283	K	TRINITY_DN100500_c0_g1|g.867 ORF TRINITY_DN100500_c0_g1|g.867 TRINITY_DN100500_c0_g1_m.867 type:complete len:531 (+) TRINITY_DN100500_c0_g1:105-1697(+)	1	8.77894e-10	147.19	LSK(1)SINENPTR	2	-2.5247	1
TRINITY_DN100500_c0_g1_m.867	275	K	TRINITY_DN100500_c0_g1|g.867 ORF TRINITY_DN100500_c0_g1|g.867 TRINITY_DN100500_c0_g1_m.867 type:complete len:531 (+) TRINITY_DN100500_c0_g1:105-1697(+)	1	0.0515795	41.025	ALK(1)DAFLR	2	-1.5628	1
TRINITY_DN100500_c0_g1_m.867	480	K	TRINITY_DN100500_c0_g1|g.867 ORF TRINITY_DN100500_c0_g1|g.867 TRINITY_DN100500_c0_g1_m.867 type:complete len:531 (+) TRINITY_DN100500_c0_g1:105-1697(+)	1	0.00025808	89.923	VQASQSGNNEEK(1)NPDLVK	2	-3.6893	1
TRINITY_DN100500_c0_g1_m.867	406	K	TRINITY_DN100500_c0_g1|g.867 ORF TRINITY_DN100500_c0_g1|g.867 TRINITY_DN100500_c0_g1_m.867 type:complete len:531 (+) TRINITY_DN100500_c0_g1:105-1697(+)	1	0.0345872	42.061	TEGLGNK(1)EMDVK	2	1.1231	1
TRINITY_DN100505_c0_g1_m.878	100	K	TRINITY_DN100505_c0_g1|g.878 ORF TRINITY_DN100505_c0_g1|g.878 TRINITY_DN100505_c0_g1_m.878 type:complete len:212 (+) TRINITY_DN100505_c0_g1:499-1134(+)	1	0.000639421	72.365	PLVSFEDVK(1)K	2	2.3784	1
TRINITY_DN100512_c0_g12_m.890	99	K	TRINITY_DN100512_c0_g12|g.890 ORF TRINITY_DN100512_c0_g12|g.890 TRINITY_DN100512_c0_g12_m.890 type:5prime_partial len:107 (+) TRINITY_DN100512_c0_g12:1-321(+)	0.999987	6.4913e-06	142.71	EEVKKPEVK(1)SIEISGE	2	-4.4931	2
TRINITY_DN100512_c0_g12_m.890	90	K	TRINITY_DN100512_c0_g12|g.890 ORF TRINITY_DN100512_c0_g12|g.890 TRINITY_DN100512_c0_g12_m.890 type:5prime_partial len:107 (+) TRINITY_DN100512_c0_g12:1-321(+)	1	9.12852e-20	150.81	ASIENGVLSVLVPK(1)EEVK	2	1.624	1
TRINITY_DN100512_c0_g12_m.890	71	K	TRINITY_DN100512_c0_g12|g.890 ORF TRINITY_DN100512_c0_g12|g.890 TRINITY_DN100512_c0_g12_m.890 type:5prime_partial len:107 (+) TRINITY_DN100512_c0_g12:1-321(+)	1	1.22274e-06	150.21	LPENVK(1)VDQVK	2	2.9684	1
TRINITY_DN100512_c0_g12_m.890	46	K	TRINITY_DN100512_c0_g12|g.890 ORF TRINITY_DN100512_c0_g12|g.890 TRINITY_DN100512_c0_g12_m.890 type:5prime_partial len:107 (+) TRINITY_DN100512_c0_g12:1-321(+)	1	0.000474114	113.7	EQEEK(1)TDR	2	1.3131	1
TRINITY_DN100512_c0_g12_m.890	41	K	TRINITY_DN100512_c0_g12|g.890 ORF TRINITY_DN100512_c0_g12|g.890 TRINITY_DN100512_c0_g12_m.890 type:5prime_partial len:107 (+) TRINITY_DN100512_c0_g12:1-321(+)	0.954219	4.26226e-05	159.46	K(0.046)K(0.954)EQEEK	2	2.5772	1
TRINITY_DN100512_c0_g12_m.890	12	K	TRINITY_DN100512_c0_g12|g.890 ORF TRINITY_DN100512_c0_g12|g.890 TRINITY_DN100512_c0_g12_m.890 type:5prime_partial len:107 (+) TRINITY_DN100512_c0_g12:1-321(+)	1	6.09457e-35	217.2	ETPEAHIFK(1)ADLPGVK	2	-1.8125	2
TRINITY_DN100512_c0_g4_m.891	54	K	TRINITY_DN100512_c0_g4|g.891 ORF TRINITY_DN100512_c0_g4|g.891 TRINITY_DN100512_c0_g4_m.891 type:internal len:120 (+) TRINITY_DN100512_c0_g4:1-357(+)	1	5.38393e-14	153.18	ETPEAHIFK(1)ADLPGLK	2	-2.2125	4
TRINITY_DN100516_c5_g1_m.907	271	K	TRINITY_DN100516_c5_g1|g.907 ORF TRINITY_DN100516_c5_g1|g.907 TRINITY_DN100516_c5_g1_m.907 type:complete len:390 (+) TRINITY_DN100516_c5_g1:305-1474(+)	1	8.04043e-12	156.02	DK(1)ATPEQVAEYTLK	2	-0.16049	1
TRINITY_DN100516_c5_g1_m.907	51	K	TRINITY_DN100516_c5_g1|g.907 ORF TRINITY_DN100516_c5_g1|g.907 TRINITY_DN100516_c5_g1_m.907 type:complete len:390 (+) TRINITY_DN100516_c5_g1:305-1474(+)	1	9.03214e-05	123.42	TAK(1)TVASPGR	2	1.3822	1
TRINITY_DN100516_c5_g1_m.907	348	K	TRINITY_DN100516_c5_g1|g.907 ORF TRINITY_DN100516_c5_g1|g.907 TRINITY_DN100516_c5_g1_m.907 type:complete len:390 (+) TRINITY_DN100516_c5_g1:305-1474(+)	1	1.5377e-14	142.32	TWAGRPENVK(1)AAQDTLLIR	3	1.2566	2
TRINITY_DN100516_c5_g1_m.907	269	K	TRINITY_DN100516_c5_g1|g.907 ORF TRINITY_DN100516_c5_g1|g.907 TRINITY_DN100516_c5_g1_m.907 type:complete len:390 (+) TRINITY_DN100516_c5_g1:305-1474(+)	1	1.90165e-07	136.06	PSMVTPGAESK(1)DK	2	-0.93535	2
TRINITY_DN100516_c5_g1_m.907	319	K	TRINITY_DN100516_c5_g1|g.907 ORF TRINITY_DN100516_c5_g1|g.907 TRINITY_DN100516_c5_g1_m.907 type:complete len:390 (+) TRINITY_DN100516_c5_g1:305-1474(+)	1	0.000324941	66.664	K(1)NPWHVSFSYAR	3	-3.1674	1
TRINITY_DN100516_c5_g1_m.907	72	K	TRINITY_DN100516_c5_g1|g.907 ORF TRINITY_DN100516_c5_g1|g.907 TRINITY_DN100516_c5_g1_m.907 type:complete len:390 (+) TRINITY_DN100516_c5_g1:305-1474(+)	1	7.42987e-44	256.71	GILAMDESNATCGK(1)R	2	-1.9416	2
TRINITY_DN100516_c5_g1_m.907	379	K	TRINITY_DN100516_c5_g1|g.907 ORF TRINITY_DN100516_c5_g1|g.907 TRINITY_DN100516_c5_g1_m.907 type:complete len:390 (+) TRINITY_DN100516_c5_g1:305-1474(+)	1	0.0020713	77.358	YTGEDESAESK(1)K	2	0.99642	1
TRINITY_DN100516_c5_g1_m.907	338	K	TRINITY_DN100516_c5_g1|g.907 ORF TRINITY_DN100516_c5_g1|g.907 TRINITY_DN100516_c5_g1_m.907 type:complete len:390 (+) TRINITY_DN100516_c5_g1:305-1474(+)	1	0.000438255	69.327	ALQNTCLK(1)TWAGRPENVK	3	-1.6595	1
TRINITY_DN100516_c7_g1_m.909	199	K	TRINITY_DN100516_c7_g1|g.909 ORF TRINITY_DN100516_c7_g1|g.909 TRINITY_DN100516_c7_g1_m.909 type:5prime_partial len:274 (+) TRINITY_DN100516_c7_g1:3-824(+)	1	0.0395087	40.502	PFIGFK(1)EIR	2	-1.1113	1
TRINITY_DN100516_c7_g1_m.909	257	K	TRINITY_DN100516_c7_g1|g.909 ORF TRINITY_DN100516_c7_g1|g.909 TRINITY_DN100516_c7_g1_m.909 type:5prime_partial len:274 (+) TRINITY_DN100516_c7_g1:3-824(+)	1	0.0449116	49.325	IQFAK(1)FPLR	2	-2.3208	1
TRINITY_DN100518_c1_g1_m.915	204	K	TRINITY_DN100518_c1_g1|g.915 ORF TRINITY_DN100518_c1_g1|g.915 TRINITY_DN100518_c1_g1_m.915 type:complete len:295 (+) TRINITY_DN100518_c1_g1:497-1381(+)	1	0.000139875	88.181	VQNDSQVK(1)VR	2	1.5515	1
TRINITY_DN100526_c0_g1_m.927	319	K	TRINITY_DN100526_c0_g1|g.927 ORF TRINITY_DN100526_c0_g1|g.927 TRINITY_DN100526_c0_g1_m.927 type:complete len:794 (+) TRINITY_DN100526_c0_g1:187-2568(+)	1	2.08562e-07	113.46	LLEDVLNEK(1)VDR	2	1.0885	1
TRINITY_DN100526_c0_g1_m.927	568	K	TRINITY_DN100526_c0_g1|g.927 ORF TRINITY_DN100526_c0_g1|g.927 TRINITY_DN100526_c0_g1_m.927 type:complete len:794 (+) TRINITY_DN100526_c0_g1:187-2568(+)	1	0.000487616	68.108	ILSDK(1)LESAMVVLK	2	2.3986	1
TRINITY_DN100526_c0_g1_m.927	536	K	TRINITY_DN100526_c0_g1|g.927 ORF TRINITY_DN100526_c0_g1|g.927 TRINITY_DN100526_c0_g1_m.927 type:complete len:794 (+) TRINITY_DN100526_c0_g1:187-2568(+)	1	1.80298e-05	82.437	NSYEEVTSK(1)ISK	2	-0.097089	1
TRINITY_DN100526_c0_g1_m.927	250	K	TRINITY_DN100526_c0_g1|g.927 ORF TRINITY_DN100526_c0_g1|g.927 TRINITY_DN100526_c0_g1_m.927 type:complete len:794 (+) TRINITY_DN100526_c0_g1:187-2568(+)	1	4.93331e-11	133.49	LLNEQEEHK(1)GQLR	2	-2.7534	1
TRINITY_DN100526_c0_g1_m.927	295	K	TRINITY_DN100526_c0_g1|g.927 ORF TRINITY_DN100526_c0_g1|g.927 TRINITY_DN100526_c0_g1_m.927 type:complete len:794 (+) TRINITY_DN100526_c0_g1:187-2568(+)	1	1.47346e-06	88.796	LAAEFLSQK(1)SQLEHSFTQAR	3	0.77829	1
TRINITY_DN100526_c0_g1_m.927	539	K	TRINITY_DN100526_c0_g1|g.927 ORF TRINITY_DN100526_c0_g1|g.927 TRINITY_DN100526_c0_g1_m.927 type:complete len:794 (+) TRINITY_DN100526_c0_g1:187-2568(+)	1	4.11237e-05	75.474	ISK(1)MQEEYDQAR	2	-0.98899	1
TRINITY_DN100526_c0_g1_m.927	257	K	TRINITY_DN100526_c0_g1|g.927 ORF TRINITY_DN100526_c0_g1|g.927 TRINITY_DN100526_c0_g1_m.927 type:complete len:794 (+) TRINITY_DN100526_c0_g1:187-2568(+)	1	6.22683e-13	124.62	LK(1)DEEASLSSQLTSAK	2	-2.2901	1
TRINITY_DN100533_c0_g2_m.933	262	K	TRINITY_DN100533_c0_g2|g.933 ORF TRINITY_DN100533_c0_g2|g.933 TRINITY_DN100533_c0_g2_m.933 type:complete len:300 (+) TRINITY_DN100533_c0_g2:35-934(+)	1	0.0746953	44.767	TPK(1)EILR	2	1.2866	1
TRINITY_DN100541_c0_g1_m.953	694	K	TRINITY_DN100541_c0_g1|g.953 ORF TRINITY_DN100541_c0_g1|g.953 TRINITY_DN100541_c0_g1_m.953 type:complete len:842 (+) TRINITY_DN100541_c0_g1:397-2922(+)	1	0.00263255	94.806	HK(1)EWTER	2	1.443	1
TRINITY_DN100541_c0_g1_m.953	251	K	TRINITY_DN100541_c0_g1|g.953 ORF TRINITY_DN100541_c0_g1|g.953 TRINITY_DN100541_c0_g1_m.953 type:complete len:842 (+) TRINITY_DN100541_c0_g1:397-2922(+)	0.999087	6.80115e-05	65.173	FK(0.001)DEYK(0.999)IDVYQNAR	2	-4.0031	2
TRINITY_DN100541_c0_g1_m.953	61	K	TRINITY_DN100541_c0_g1|g.953 ORF TRINITY_DN100541_c0_g1|g.953 TRINITY_DN100541_c0_g1_m.953 type:complete len:842 (+) TRINITY_DN100541_c0_g1:397-2922(+)	1	7.37974e-05	69.369	FIGTAGAATSTMNPK(1)NAISQIK	2	-2.703	1
TRINITY_DN100541_c0_g1_m.953	68	K	TRINITY_DN100541_c0_g1|g.953 ORF TRINITY_DN100541_c0_g1|g.953 TRINITY_DN100541_c0_g1_m.953 type:complete len:842 (+) TRINITY_DN100541_c0_g1:397-2922(+)	1	0.000332888	121.31	NAISQIK(1)R	2	-1.7802	1
TRINITY_DN100541_c0_g1_m.953	720	K	TRINITY_DN100541_c0_g1|g.953 ORF TRINITY_DN100541_c0_g1|g.953 TRINITY_DN100541_c0_g1_m.953 type:complete len:842 (+) TRINITY_DN100541_c0_g1:397-2922(+)	1	0.0178022	52.591	EAALSK(1)DPK	2	1.1933	1
TRINITY_DN100541_c0_g1_m.953	749	K	TRINITY_DN100541_c0_g1|g.953 ORF TRINITY_DN100541_c0_g1|g.953 TRINITY_DN100541_c0_g1_m.953 type:complete len:842 (+) TRINITY_DN100541_c0_g1:397-2922(+)	1	0.00198625	65.879	DK(1)QQQQDGLPK	2	-0.33939	1
TRINITY_DN100541_c0_g1_m.953	723	K	TRINITY_DN100541_c0_g1|g.953 ORF TRINITY_DN100541_c0_g1|g.953 TRINITY_DN100541_c0_g1_m.953 type:complete len:842 (+) TRINITY_DN100541_c0_g1:397-2922(+)	1	2.64868e-10	91.939	DPK(1)FDHIDIAEK	2	-0.63361	1
TRINITY_DN100541_c0_g1_m.953	639	K	TRINITY_DN100541_c0_g1|g.953 ORF TRINITY_DN100541_c0_g1|g.953 TRINITY_DN100541_c0_g1_m.953 type:complete len:842 (+) TRINITY_DN100541_c0_g1:397-2922(+)	1	0.000965822	63.766	VHDK(1)YHEFVTASER	2	-2.9586	3
TRINITY_DN100541_c0_g1_m.953	619	K	TRINITY_DN100541_c0_g1|g.953 ORF TRINITY_DN100541_c0_g1|g.953 TRINITY_DN100541_c0_g1_m.953 type:complete len:842 (+) TRINITY_DN100541_c0_g1:397-2922(+)	1	0.00118935	79.809	VMEETK(1)DR	2	-1.3268	2
TRINITY_DN100541_c0_g1_m.953	357	K	TRINITY_DN100541_c0_g1|g.953 ORF TRINITY_DN100541_c0_g1|g.953 TRINITY_DN100541_c0_g1_m.953 type:complete len:842 (+) TRINITY_DN100541_c0_g1:397-2922(+)	1	0.00168537	76.85	ILTDFFGK(1)EPR	2	-0.82688	1
TRINITY_DN100541_c0_g1_m.953	570	K	TRINITY_DN100541_c0_g1|g.953 ORF TRINITY_DN100541_c0_g1|g.953 TRINITY_DN100541_c0_g1_m.953 type:complete len:842 (+) TRINITY_DN100541_c0_g1:397-2922(+)	1	0.042997	64.906	MDTDTK(1)AVASK	2	1.7559	1
TRINITY_DN100541_c0_g1_m.953	678	K	TRINITY_DN100541_c0_g1|g.953 ORF TRINITY_DN100541_c0_g1|g.953 TRINITY_DN100541_c0_g1_m.953 type:complete len:842 (+) TRINITY_DN100541_c0_g1:397-2922(+)	1	5.58017e-06	120.65	GVYIAK(1)LEELKK	2	-0.44228	1
TRINITY_DN100541_c0_g1_m.953	732	K	TRINITY_DN100541_c0_g1|g.953 ORF TRINITY_DN100541_c0_g1|g.953 TRINITY_DN100541_c0_g1_m.953 type:complete len:842 (+) TRINITY_DN100541_c0_g1:397-2922(+)	1	1.24362e-06	110.88	FDHIDIAEK(1)QK	2	2.8285	1
TRINITY_DN100559_c0_g4_m.987	515	K	TRINITY_DN100559_c0_g4|g.987 ORF TRINITY_DN100559_c0_g4|g.987 TRINITY_DN100559_c0_g4_m.987 type:complete len:592 (+) TRINITY_DN100559_c0_g4:496-2271(+)	1	0.00372733	55.604	TMLDALIPAASVLK(1)ER	2	2.0369	1
TRINITY_DN100581_c0_g1_m.1039	137	K	TRINITY_DN100581_c0_g1|g.1039 ORF TRINITY_DN100581_c0_g1|g.1039 TRINITY_DN100581_c0_g1_m.1039 type:5prime_partial len:520 (+) TRINITY_DN100581_c0_g1:1-1560(+)	1	0.0340276	45.489	IGSSWAVK(1)K	2	-1.0808	1
TRINITY_DN100581_c0_g1_m.1039	145	K	TRINITY_DN100581_c0_g1|g.1039 ORF TRINITY_DN100581_c0_g1|g.1039 TRINITY_DN100581_c0_g1_m.1039 type:5prime_partial len:520 (+) TRINITY_DN100581_c0_g1:1-1560(+)	1	0.00632716	45.939	LVEIGK(1)QGVSR	2	0.99	1
TRINITY_DN100581_c0_g1_m.1039	89	K	TRINITY_DN100581_c0_g1|g.1039 ORF TRINITY_DN100581_c0_g1|g.1039 TRINITY_DN100581_c0_g1_m.1039 type:5prime_partial len:520 (+) TRINITY_DN100581_c0_g1:1-1560(+)	1	0.0118606	62.88	WFLK(1)EEGR	2	-3.2956	1
TRINITY_DN100585_c1_g1_m.1061	124	K	TRINITY_DN100585_c1_g1|g.1061 ORF TRINITY_DN100585_c1_g1|g.1061 TRINITY_DN100585_c1_g1_m.1061 type:complete len:261 (+) TRINITY_DN100585_c1_g1:165-947(+)	1	5.94819e-10	96.27	LLDSHLIPSATAAESK(1)VFYLK	3	0.91947	1
TRINITY_DN100585_c1_g1_m.1061	33	K	TRINITY_DN100585_c1_g1|g.1061 ORF TRINITY_DN100585_c1_g1|g.1061 TRINITY_DN100585_c1_g1_m.1061 type:complete len:261 (+) TRINITY_DN100585_c1_g1:165-947(+)	1	0.000145136	96.946	YEEMVEFMEK(1)VVK	2	-0.082823	1
TRINITY_DN100585_c1_g1_m.1061	36	K	TRINITY_DN100585_c1_g1|g.1061 ORF TRINITY_DN100585_c1_g1|g.1061 TRINITY_DN100585_c1_g1_m.1061 type:complete len:261 (+) TRINITY_DN100585_c1_g1:165-947(+)	1	7.44707e-09	106.97	VVK(1)AVDVEELTVEER	2	-1.1397	2
TRINITY_DN100585_c1_g1_m.1061	89	K	TRINITY_DN100585_c1_g1|g.1061 ORF TRINITY_DN100585_c1_g1|g.1061 TRINITY_DN100585_c1_g1_m.1061 type:complete len:261 (+) TRINITY_DN100585_c1_g1:165-947(+)	1	0.00119439	55.604	GNEDHVALIK(1)EYR	2	-2.8471	1
TRINITY_DN100585_c1_g1_m.1061	101	K	TRINITY_DN100585_c1_g1|g.1061 ORF TRINITY_DN100585_c1_g1|g.1061 TRINITY_DN100585_c1_g1_m.1061 type:complete len:261 (+) TRINITY_DN100585_c1_g1:165-947(+)	0.999981	0.00208184	58.508	GKIEDELSK(1)ICDGILK	2	0.28583	1
TRINITY_DN100585_c1_g1_m.1061	94	K	TRINITY_DN100585_c1_g1|g.1061 ORF TRINITY_DN100585_c1_g1|g.1061 TRINITY_DN100585_c1_g1_m.1061 type:complete len:261 (+) TRINITY_DN100585_c1_g1:165-947(+)	1	0.0133867	68.49	GK(1)IEDELSK	2	0.44051	1
TRINITY_DN100585_c1_g1_m.1061	108	K	TRINITY_DN100585_c1_g1|g.1061 ORF TRINITY_DN100585_c1_g1|g.1061 TRINITY_DN100585_c1_g1_m.1061 type:complete len:261 (+) TRINITY_DN100585_c1_g1:165-947(+)	1	1.09593e-11	125.25	ICDGILK(1)LLDSHLIPSATAAESK	3	-0.43072	1
TRINITY_DN100585_c1_g1_m.1061	16	K	TRINITY_DN100585_c1_g1|g.1061 ORF TRINITY_DN100585_c1_g1|g.1061 TRINITY_DN100585_c1_g1_m.1061 type:complete len:261 (+) TRINITY_DN100585_c1_g1:165-947(+)	1	2.87592e-18	170.22	EDNVYLAK(1)LSEQAER	2	-0.13517	1
TRINITY_DN100590_c3_g2_m.1072	455	K	TRINITY_DN100590_c3_g2|g.1072 ORF TRINITY_DN100590_c3_g2|g.1072 TRINITY_DN100590_c3_g2_m.1072 type:5prime_partial len:535 (+) TRINITY_DN100590_c3_g2:1-1605(+)	1	0.00407827	50.314	EIAEK(1)HDLPIQDFVVR	3	-4.2889	1
TRINITY_DN100590_c3_g2_m.1072	389	K	TRINITY_DN100590_c3_g2|g.1072 ORF TRINITY_DN100590_c3_g2|g.1072 TRINITY_DN100590_c3_g2_m.1072 type:5prime_partial len:535 (+) TRINITY_DN100590_c3_g2:1-1605(+)	1	1.00165e-18	176.58	ITNSFNSSNTK(1)LVDK	2	-1.5645	1
TRINITY_DN100590_c3_g2_m.1072	255	K	TRINITY_DN100590_c3_g2|g.1072 ORF TRINITY_DN100590_c3_g2|g.1072 TRINITY_DN100590_c3_g2_m.1072 type:5prime_partial len:535 (+) TRINITY_DN100590_c3_g2:1-1605(+)	1	0.0221637	51.531	FK(1)TDGVESHDK	2	0.079416	1
TRINITY_DN100597_c5_g1_m.1077	172	K	TRINITY_DN100597_c5_g1|g.1077 ORF TRINITY_DN100597_c5_g1|g.1077 TRINITY_DN100597_c5_g1_m.1077 type:complete len:325 (+) TRINITY_DN100597_c5_g1:347-1321(+)	1	2.50475e-06	106.97	LPSLHGYLTSDVK(1)PAIGK	3	-3.4962	1
TRINITY_DN100597_c5_g1_m.1077	224	K	TRINITY_DN100597_c5_g1|g.1077 ORF TRINITY_DN100597_c5_g1|g.1077 TRINITY_DN100597_c5_g1_m.1077 type:complete len:325 (+) TRINITY_DN100597_c5_g1:347-1321(+)	1	7.68009e-09	121.86	LLSTGPVLQTETSPK(1)K	2	-2.5695	1
TRINITY_DN100616_c1_g1_m.1117	486	K	TRINITY_DN100616_c1_g1|g.1117 ORF TRINITY_DN100616_c1_g1|g.1117 TRINITY_DN100616_c1_g1_m.1117 type:5prime_partial len:518 (+) TRINITY_DN100616_c1_g1:3-1556(+)	1	4.77648e-05	88.181	VALLHLGK(1)LGAK	2	2.4471	2
TRINITY_DN100616_c1_g1_m.1117	369	K	TRINITY_DN100616_c1_g1|g.1117 ORF TRINITY_DN100616_c1_g1|g.1117 TRINITY_DN100616_c1_g1_m.1117 type:5prime_partial len:518 (+) TRINITY_DN100616_c1_g1:3-1556(+)	1	0.000421153	88.181	DIIMVDHMK(1)K	2	0.47818	1
TRINITY_DN100616_c1_g1_m.1117	307	K	TRINITY_DN100616_c1_g1|g.1117 ORF TRINITY_DN100616_c1_g1|g.1117 TRINITY_DN100616_c1_g1_m.1117 type:5prime_partial len:518 (+) TRINITY_DN100616_c1_g1:3-1556(+)	1	4.44404e-14	97.949	VAVVCGYGDVGK(1)GCAAALK	2	-1.76	1
TRINITY_DN100616_c1_g1_m.1117	314	K	TRINITY_DN100616_c1_g1|g.1117 ORF TRINITY_DN100616_c1_g1|g.1117 TRINITY_DN100616_c1_g1_m.1117 type:5prime_partial len:518 (+) TRINITY_DN100616_c1_g1:3-1556(+)	1	7.28872e-07	83.438	GCAAALK(1)SAGAR	2	0.34892	1
TRINITY_DN100616_c1_g1_m.1117	417	K	TRINITY_DN100616_c1_g1|g.1117 ORF TRINITY_DN100616_c1_g1|g.1117 TRINITY_DN100616_c1_g1_m.1117 type:5prime_partial len:518 (+) TRINITY_DN100616_c1_g1:3-1556(+)	1	0.00190365	62.454	WVFPDTNK(1)GIIVLAEGR	2	5.0615	1
TRINITY_DN100616_c1_g1_m.1117	243	K	TRINITY_DN100616_c1_g1|g.1117 ORF TRINITY_DN100616_c1_g1|g.1117 TRINITY_DN100616_c1_g1_m.1117 type:5prime_partial len:518 (+) TRINITY_DN100616_c1_g1:3-1556(+)	1	7.05213e-25	244.74	LVGVSEETTTGVK(1)R	2	-0.43994	1
TRINITY_DN100616_c1_g1_m.1117	191	K	TRINITY_DN100616_c1_g1|g.1117 ORF TRINITY_DN100616_c1_g1|g.1117 TRINITY_DN100616_c1_g1_m.1117 type:5prime_partial len:518 (+) TRINITY_DN100616_c1_g1:3-1556(+)	1	0.00188593	61.48	AEEEYEK(1)TGK	2	0.9549	1
TRINITY_DN100616_c1_g1_m.1117	49	K	TRINITY_DN100616_c1_g1|g.1117 ORF TRINITY_DN100616_c1_g1|g.1117 TRINITY_DN100616_c1_g1_m.1117 type:5prime_partial len:518 (+) TRINITY_DN100616_c1_g1:3-1556(+)	1	0.000696467	106	VK(1)DMSQADFGR	2	0.5081	2
TRINITY_DN100616_c1_g1_m.1117	493	K	TRINITY_DN100616_c1_g1|g.1117 ORF TRINITY_DN100616_c1_g1|g.1117 TRINITY_DN100616_c1_g1_m.1117 type:5prime_partial len:518 (+) TRINITY_DN100616_c1_g1:3-1556(+)	1	1.57328e-09	98.942	LTK(1)LSPAQAEYISVPVEGPYKPPHYR	4	1.134	1
TRINITY_DN100616_c1_g1_m.1117	478	K	TRINITY_DN100616_c1_g1|g.1117 ORF TRINITY_DN100616_c1_g1|g.1117 TRINITY_DN100616_c1_g1_m.1117 type:5prime_partial len:518 (+) TRINITY_DN100616_c1_g1:3-1556(+)	1	2.17955e-05	115.04	HLDEK(1)VALLHLGK	2	-1.4027	2
TRINITY_DN100616_c1_g1_m.1117	404	K	TRINITY_DN100616_c1_g1|g.1117 ORF TRINITY_DN100616_c1_g1|g.1117 TRINITY_DN100616_c1_g1_m.1117 type:5prime_partial len:518 (+) TRINITY_DN100616_c1_g1:3-1556(+)	1	0.00360836	79.059	ITIK(1)PQTDR	2	1.4666	1
TRINITY_DN100616_c1_g1_m.1117	473	K	TRINITY_DN100616_c1_g1|g.1117 ORF TRINITY_DN100616_c1_g1|g.1117 TRINITY_DN100616_c1_g1_m.1117 type:5prime_partial len:518 (+) TRINITY_DN100616_c1_g1:3-1556(+)	1	8.30763e-07	141.29	VYVLPK(1)HLDEK	2	-0.46679	3
TRINITY_DN100617_c0_g1_m.1121	124	K	TRINITY_DN100617_c0_g1|g.1121 ORF TRINITY_DN100617_c0_g1|g.1121 TRINITY_DN100617_c0_g1_m.1121 type:complete len:425 (+) TRINITY_DN100617_c0_g1:23-1297(+)	1	0.0083474	81.163	LLSGDVDQK(1)K	2	0.02284	1
TRINITY_DN100617_c0_g1_m.1121	360	K	TRINITY_DN100617_c0_g1|g.1121 ORF TRINITY_DN100617_c0_g1|g.1121 TRINITY_DN100617_c0_g1_m.1121 type:complete len:425 (+) TRINITY_DN100617_c0_g1:23-1297(+)	1	7.38819e-07	138.71	DAEK(1)AAFDEAEK	2	0.63123	1
TRINITY_DN100617_c0_g1_m.1121	354	K	TRINITY_DN100617_c0_g1|g.1121 ORF TRINITY_DN100617_c0_g1|g.1121 TRINITY_DN100617_c0_g1_m.1121 type:complete len:425 (+) TRINITY_DN100617_c0_g1:23-1297(+)	1	4.26346e-06	114.64	VAEETWGK(1)NK	2	0.73441	1
TRINITY_DN100617_c0_g1_m.1121	286	K	TRINITY_DN100617_c0_g1|g.1121 ORF TRINITY_DN100617_c0_g1|g.1121 TRINITY_DN100617_c0_g1_m.1121 type:complete len:425 (+) TRINITY_DN100617_c0_g1:23-1297(+)	1	0.016918	61.494	IK(1)NPNYK	2	1.4589	1
TRINITY_DN100617_c0_g1_m.1121	106	K	TRINITY_DN100617_c0_g1|g.1121 ORF TRINITY_DN100617_c0_g1|g.1121 TRINITY_DN100617_c0_g1_m.1121 type:complete len:425 (+) TRINITY_DN100617_c0_g1:23-1297(+)	1	5.49338e-05	66.619	HEQK(1)LDCGGGYMK	2	-2.8648	1
TRINITY_DN100617_c0_g1_m.1121	102	K	TRINITY_DN100617_c0_g1|g.1121 ORF TRINITY_DN100617_c0_g1|g.1121 TRINITY_DN100617_c0_g1_m.1121 type:complete len:425 (+) TRINITY_DN100617_c0_g1:23-1297(+)	1	0.000760108	64.266	TLVFQFSVK(1)HEQK	2	-3.6739	1
TRINITY_DN100617_c0_g1_m.1121	213	K	TRINITY_DN100617_c0_g1|g.1121 ORF TRINITY_DN100617_c0_g1|g.1121 TRINITY_DN100617_c0_g1_m.1121 type:complete len:425 (+) TRINITY_DN100617_c0_g1:23-1297(+)	1	0.00635461	67.507	QIK(1)DPDAK	2	0.50633	1
TRINITY_DN100617_c0_g1_m.1121	68	K	TRINITY_DN100617_c0_g1|g.1121 ORF TRINITY_DN100617_c0_g1|g.1121 TRINITY_DN100617_c0_g1_m.1121 type:complete len:425 (+) TRINITY_DN100617_c0_g1:23-1297(+)	1	0.00395797	59.997	WSGDANDK(1)GIQTYPDFR	2	-2.078	1
TRINITY_DN100617_c0_g1_m.1121	41	K	TRINITY_DN100617_c0_g1|g.1121 ORF TRINITY_DN100617_c0_g1|g.1121 TRINITY_DN100617_c0_g1_m.1121 type:complete len:425 (+) TRINITY_DN100617_c0_g1:23-1297(+)	1	0.0136142	72.492	WVK(1)SDWK	2	-1.6665	1
TRINITY_DN100622_c1_g2_m.1132	920	K	TRINITY_DN100622_c1_g2|g.1132 ORF TRINITY_DN100622_c1_g2|g.1132 TRINITY_DN100622_c1_g2_m.1132 type:5prime_partial len:1254 (+) TRINITY_DN100622_c1_g2:1-3762(+)	0.999922	0.000673774	45.654	NHDNQK(1)QEWTDEELKK	3	-0.43653	1
TRINITY_DN100642_c1_g1_m.1168	203	K	TRINITY_DN100642_c1_g1|g.1168 ORF TRINITY_DN100642_c1_g1|g.1168 TRINITY_DN100642_c1_g1_m.1168 type:complete len:242 (+) TRINITY_DN100642_c1_g1:228-953(+)	1	0.0169449	60.709	IK(1)LSPWFR	2	-0.44716	1
TRINITY_DN100642_c1_g1_m.1168	235	K	TRINITY_DN100642_c1_g1|g.1168 ORF TRINITY_DN100642_c1_g1|g.1168 TRINITY_DN100642_c1_g1_m.1168 type:complete len:242 (+) TRINITY_DN100642_c1_g1:228-953(+)	1	0.00285014	65.879	GTLHEAANMK(1)AIHK	3	2.3574	1
TRINITY_DN100650_c4_g2_m.1181	188	K	TRINITY_DN100650_c4_g2|g.1181 ORF TRINITY_DN100650_c4_g2|g.1181 TRINITY_DN100650_c4_g2_m.1181 type:complete len:393 (+) TRINITY_DN100650_c4_g2:120-1298(+)	1	0.00397505	51.569	VHFATVANLK(1)DPLIAK	3	-4.317	1
TRINITY_DN100650_c4_g2_m.1182	118	K	TRINITY_DN100650_c4_g2|g.1182 ORF TRINITY_DN100650_c4_g2|g.1182 TRINITY_DN100650_c4_g2_m.1182 type:complete len:137 (+) TRINITY_DN100650_c4_g2:1564-1974(+)	1	0.0202693	40.83	IPSGLSFDK(1)LEPEAHR	3	3.571	1
TRINITY_DN100654_c2_g1_m.1189	128	K	TRINITY_DN100654_c2_g1|g.1189 ORF TRINITY_DN100654_c2_g1|g.1189 TRINITY_DN100654_c2_g1_m.1189 type:internal len:475 (-) TRINITY_DN100654_c2_g1:2-1423(-)	1	5.41138e-09	158.61	VK(1)QFLFNLLK	2	1.6929	1
TRINITY_DN100676_c1_g1_m.1231	254	K	TRINITY_DN100676_c1_g1|g.1231 ORF TRINITY_DN100676_c1_g1|g.1231 TRINITY_DN100676_c1_g1_m.1231 type:complete len:271 (+) TRINITY_DN100676_c1_g1:181-993(+)	1	0.000266062	92.428	ACEEDGEEVK(1)K	2	-1.5952	1
TRINITY_DN100689_c3_g3_m.1267	373	K	TRINITY_DN100689_c3_g3|g.1267 ORF TRINITY_DN100689_c3_g3|g.1267 TRINITY_DN100689_c3_g3_m.1267 type:complete len:448 (+) TRINITY_DN100689_c3_g3:90-1433(+)	1	0.0121603	77.072	SGK(1)ELEK	2	1.236	1
TRINITY_DN100689_c3_g3_m.1267	161	K	TRINITY_DN100689_c3_g3|g.1267 ORF TRINITY_DN100689_c3_g3|g.1267 TRINITY_DN100689_c3_g3_m.1267 type:complete len:448 (+) TRINITY_DN100689_c3_g3:90-1433(+)	1	0.000372158	76.572	MDATTPK(1)YSK	2	1.5465	2
TRINITY_DN100689_c3_g3_m.1267	51	K	TRINITY_DN100689_c3_g3|g.1267 ORF TRINITY_DN100689_c3_g3|g.1267 TRINITY_DN100689_c3_g3_m.1267 type:complete len:448 (+) TRINITY_DN100689_c3_g3:90-1433(+)	1	0.000184594	117.18	EAAEMNK(1)R	2	0.68497	1
TRINITY_DN100689_c3_g3_m.1267	441	K	TRINITY_DN100689_c3_g3|g.1267 ORF TRINITY_DN100689_c3_g3|g.1267 TRINITY_DN100689_c3_g3_m.1267 type:complete len:448 (+) TRINITY_DN100689_c3_g3:90-1433(+)	1	0.0595174	45.489	VTK(1)SAVK	2	0.49292	1
TRINITY_DN100689_c3_g3_m.1267	438	K	TRINITY_DN100689_c3_g3|g.1267 ORF TRINITY_DN100689_c3_g3|g.1267 TRINITY_DN100689_c3_g3_m.1267 type:complete len:448 (+) TRINITY_DN100689_c3_g3:90-1433(+)	1	0.0141504	63.397	DASGAK(1)VTK	2	-0.10692	1
TRINITY_DN100689_c3_g3_m.1267	154	K	TRINITY_DN100689_c3_g3|g.1267 ORF TRINITY_DN100689_c3_g3|g.1267 TRINITY_DN100689_c3_g3_m.1267 type:complete len:448 (+) TRINITY_DN100689_c3_g3:90-1433(+)	1	2.03765e-05	73.502	QMICCCNK(1)MDATTPK	2	-2.73	1
TRINITY_DN100689_c3_g3_m.1267	318	K	TRINITY_DN100689_c3_g3|g.1267 ORF TRINITY_DN100689_c3_g3|g.1267 TRINITY_DN100689_c3_g3_m.1267 type:complete len:448 (+) TRINITY_DN100689_c3_g3:90-1433(+)	1	1.12004e-07	132.44	GFVASNSK(1)DDPAK	2	-1.644	1
TRINITY_DN100689_c3_g3_m.1267	44	K	TRINITY_DN100689_c3_g3|g.1267 ORF TRINITY_DN100689_c3_g3|g.1267 TRINITY_DN100689_c3_g3_m.1267 type:complete len:448 (+) TRINITY_DN100689_c3_g3:90-1433(+)	1	5.37835e-09	163.43	FEK(1)EAAEMNK	2	-0.051334	3
TRINITY_DN100699_c0_g1_m.1283	228	K	TRINITY_DN100699_c0_g1|g.1283 ORF TRINITY_DN100699_c0_g1|g.1283 TRINITY_DN100699_c0_g1_m.1283 type:complete len:796 (+) TRINITY_DN100699_c0_g1:329-2716(+)	1	4.32995e-05	83.474	NYPLAVK(1)LGTLSADLEK	2	2.8009	1
TRINITY_DN100699_c0_g1_m.1283	338	K	TRINITY_DN100699_c0_g1|g.1283 ORF TRINITY_DN100699_c0_g1|g.1283 TRINITY_DN100699_c0_g1_m.1283 type:complete len:796 (+) TRINITY_DN100699_c0_g1:329-2716(+)	1	0.0171047	67.464	YYK(1)EQNLK	2	-0.60612	1
TRINITY_DN100711_c0_g2_m.1302	288	K	TRINITY_DN100711_c0_g2|g.1302 ORF TRINITY_DN100711_c0_g2|g.1302 TRINITY_DN100711_c0_g2_m.1302 type:complete len:574 (+) TRINITY_DN100711_c0_g2:188-1909(+)	1	0.064027	51.531	ICSNHSLK(1)NIK	2	0.5577	1
TRINITY_DN100713_c0_g1_m.1307	159	K	TRINITY_DN100713_c0_g1|g.1307 ORF TRINITY_DN100713_c0_g1|g.1307 TRINITY_DN100713_c0_g1_m.1307 type:complete len:495 (+) TRINITY_DN100713_c0_g1:521-2005(+)	0.998294	0.000165818	91.939	VK(0.998)EEK(0.002)PVQYVEPK	2	-1.4332	1
TRINITY_DN100752_c1_g1_m.1377	439	K	TRINITY_DN100752_c1_g1|g.1377 ORF TRINITY_DN100752_c1_g1|g.1377 TRINITY_DN100752_c1_g1_m.1377 type:complete len:505 (+) TRINITY_DN100752_c1_g1:157-1671(+)	1	0.00699012	69.905	AK(1)LDDNAR	2	0.95618	1
TRINITY_DN100752_c1_g1_m.1377	468	K	TRINITY_DN100752_c1_g1|g.1377 ORF TRINITY_DN100752_c1_g1|g.1377 TRINITY_DN100752_c1_g1_m.1377 type:complete len:505 (+) TRINITY_DN100752_c1_g1:157-1671(+)	1	0.000277206	85.821	MTK(1)DLALIVHGPK	2	-2.7262	1
TRINITY_DN100752_c1_g1_m.1377	330	K	TRINITY_DN100752_c1_g1|g.1377 ORF TRINITY_DN100752_c1_g1|g.1377 TRINITY_DN100752_c1_g1_m.1377 type:complete len:505 (+) TRINITY_DN100752_c1_g1:157-1671(+)	1	0.00314666	73.891	WK(1)SQFDASGIWYEHR	3	-0.87065	1
TRINITY_DN100752_c1_g1_m.1377	478	K	TRINITY_DN100752_c1_g1|g.1377 ORF TRINITY_DN100752_c1_g1|g.1377 TRINITY_DN100752_c1_g1_m.1377 type:complete len:505 (+) TRINITY_DN100752_c1_g1:157-1671(+)	1	0.0448362	48.701	DLALIVHGPK(1)VTR	2	0.68574	1
TRINITY_DN100752_c1_g1_m.1377	297	K	TRINITY_DN100752_c1_g1|g.1377 ORF TRINITY_DN100752_c1_g1|g.1377 TRINITY_DN100752_c1_g1_m.1377 type:complete len:505 (+) TRINITY_DN100752_c1_g1:157-1671(+)	1	6.31959e-08	84.309	AFAESSMNTAYQK(1)K	2	-1.0534	1
TRINITY_DN100754_c0_g2_m.1384	149	K	TRINITY_DN100754_c0_g2|g.1384 ORF TRINITY_DN100754_c0_g2|g.1384 TRINITY_DN100754_c0_g2_m.1384 type:complete len:266 (+) TRINITY_DN100754_c0_g2:248-1045(+)	1	0.00504254	45.654	TAIQAK(1)PDSVYFVVSR	2	-1.1739	1
TRINITY_DN100754_c0_g2_m.1384	166	K	TRINITY_DN100754_c0_g2|g.1384 ORF TRINITY_DN100754_c0_g2|g.1384 TRINITY_DN100754_c0_g2_m.1384 type:complete len:266 (+) TRINITY_DN100754_c0_g2:248-1045(+)	1	0.0182449	53.878	GAEVDVK(1)R	2	1.0257	1
TRINITY_DN100754_c0_g2_m.1384	186	K	TRINITY_DN100754_c0_g2|g.1384 ORF TRINITY_DN100754_c0_g2|g.1384 TRINITY_DN100754_c0_g2_m.1384 type:complete len:266 (+) TRINITY_DN100754_c0_g2:248-1045(+)	1	0.00338213	76.605	TLTESQK(1)TR	2	0.47551	1
TRINITY_DN100754_c0_g2_m.1384	113	K	TRINITY_DN100754_c0_g2|g.1384 ORF TRINITY_DN100754_c0_g2|g.1384 TRINITY_DN100754_c0_g2_m.1384 type:complete len:266 (+) TRINITY_DN100754_c0_g2:248-1045(+)	1	2.84345e-11	120.75	SGGGVVITAVDSGGNAAK(1)AGLK	2	-1.5377	1
TRINITY_DN100763_c0_g1_m.1391	685	K	TRINITY_DN100763_c0_g1|g.1391 ORF TRINITY_DN100763_c0_g1|g.1391 TRINITY_DN100763_c0_g1_m.1391 type:complete len:980 (+) TRINITY_DN100763_c0_g1:104-3043(+)	1	0.00325952	67.464	MK(1)VVSLVR	2	-3.8658	1
TRINITY_DN100763_c0_g1_m.1391	272	K	TRINITY_DN100763_c0_g1|g.1391 ORF TRINITY_DN100763_c0_g1|g.1391 TRINITY_DN100763_c0_g1_m.1391 type:complete len:980 (+) TRINITY_DN100763_c0_g1:104-3043(+)	1	0.0016008	64.064	K(1)HWIGGENIK	2	-0.089634	1
TRINITY_DN100763_c0_g1_m.1391	605	K	TRINITY_DN100763_c0_g1|g.1391 ORF TRINITY_DN100763_c0_g1|g.1391 TRINITY_DN100763_c0_g1_m.1391 type:complete len:980 (+) TRINITY_DN100763_c0_g1:104-3043(+)	1	0.00146426	99.855	K(1)DVFNSFYR	2	1.3586	1
TRINITY_DN100763_c0_g1_m.1391	412	K	TRINITY_DN100763_c0_g1|g.1391 ORF TRINITY_DN100763_c0_g1|g.1391 TRINITY_DN100763_c0_g1_m.1391 type:complete len:980 (+) TRINITY_DN100763_c0_g1:104-3043(+)	1	2.60357e-06	106.35	ILIDLK(1)GLSWK	2	0.127	1
TRINITY_DN100763_c0_g1_m.1391	310	K	TRINITY_DN100763_c0_g1|g.1391 ORF TRINITY_DN100763_c0_g1|g.1391 TRINITY_DN100763_c0_g1_m.1391 type:complete len:980 (+) TRINITY_DN100763_c0_g1:104-3043(+)	1	0.00106977	69.327	VPAK(1)DFDLEAFNAGK	2	1.5319	1
TRINITY_DN100763_c0_g1_m.1391	655	K	TRINITY_DN100763_c0_g1|g.1391 ORF TRINITY_DN100763_c0_g1|g.1391 TRINITY_DN100763_c0_g1_m.1391 type:complete len:980 (+) TRINITY_DN100763_c0_g1:104-3043(+)	0.997205	0.000134803	78.888	WIGTEDWVVK(0.997)TENLEELK(0.003)K	3	1.9569	1
TRINITY_DN100763_c0_g1_m.1391	295	K	TRINITY_DN100763_c0_g1|g.1391 ORF TRINITY_DN100763_c0_g1|g.1391 TRINITY_DN100763_c0_g1_m.1391 type:complete len:980 (+) TRINITY_DN100763_c0_g1:104-3043(+)	1	0.032544	69.905	TK(1)TTLNLR	2	-0.79136	1
TRINITY_DN100763_c0_g1_m.1391	762	K	TRINITY_DN100763_c0_g1|g.1391 ORF TRINITY_DN100763_c0_g1|g.1391 TRINITY_DN100763_c0_g1_m.1391 type:complete len:980 (+) TRINITY_DN100763_c0_g1:104-3043(+)	1	0.00214173	72.038	AFATYVQAK(1)R	2	-0.083118	1
TRINITY_DN100763_c0_g1_m.1391	220	K	TRINITY_DN100763_c0_g1|g.1391 ORF TRINITY_DN100763_c0_g1|g.1391 TRINITY_DN100763_c0_g1_m.1391 type:complete len:980 (+) TRINITY_DN100763_c0_g1:104-3043(+)	1	2.13569e-10	148.76	YK(1)YGLFQQTITK	2	-0.76364	1
TRINITY_DN100763_c0_g1_m.1391	956	K	TRINITY_DN100763_c0_g1|g.1391 ORF TRINITY_DN100763_c0_g1|g.1391 TRINITY_DN100763_c0_g1_m.1391 type:complete len:980 (+) TRINITY_DN100763_c0_g1:104-3043(+)	1	1.42265e-13	126.17	MSILNTAGSHK(1)FSSDR	3	-0.3167	3
TRINITY_DN100763_c0_g1_m.1391	664	K	TRINITY_DN100763_c0_g1|g.1391 ORF TRINITY_DN100763_c0_g1|g.1391 TRINITY_DN100763_c0_g1_m.1391 type:complete len:980 (+) TRINITY_DN100763_c0_g1:104-3043(+)	1	0.000473587	72.327	K(1)HADNEDLHMEWR	3	-1.4354	1
TRINITY_DN100763_c0_g1_m.1391	506	K	TRINITY_DN100763_c0_g1|g.1391 ORF TRINITY_DN100763_c0_g1|g.1391 TRINITY_DN100763_c0_g1_m.1391 type:complete len:980 (+) TRINITY_DN100763_c0_g1:104-3043(+)	1	0.00328683	55.782	ILDNVDFPDSVVELFNK(1)AK	2	2.7507	1
TRINITY_DN100763_c0_g1_m.1391	321	K	TRINITY_DN100763_c0_g1|g.1391 ORF TRINITY_DN100763_c0_g1|g.1391 TRINITY_DN100763_c0_g1_m.1391 type:complete len:980 (+) TRINITY_DN100763_c0_g1:104-3043(+)	1	4.01969e-09	99.127	DFDLEAFNAGK(1)HNQANEAHANAEK	3	-1.3676	1
TRINITY_DN100763_c0_g1_m.1391	293	K	TRINITY_DN100763_c0_g1|g.1391 ORF TRINITY_DN100763_c0_g1|g.1391 TRINITY_DN100763_c0_g1_m.1391 type:complete len:980 (+) TRINITY_DN100763_c0_g1:104-3043(+)	1	0.000142517	74.524	AIAYDVPIPGFK(1)TK	2	1.4338	1
TRINITY_DN100763_c0_g1_m.1391	508	K	TRINITY_DN100763_c0_g1|g.1391 ORF TRINITY_DN100763_c0_g1|g.1391 TRINITY_DN100763_c0_g1_m.1391 type:complete len:980 (+) TRINITY_DN100763_c0_g1:104-3043(+)	1	0.000562159	129.72	AK(1)TISEVK	2	-0.83171	1
TRINITY_DN100763_c0_g1_m.1391	732	K	TRINITY_DN100763_c0_g1|g.1391 ORF TRINITY_DN100763_c0_g1|g.1391 TRINITY_DN100763_c0_g1_m.1391 type:complete len:980 (+) TRINITY_DN100763_c0_g1:104-3043(+)	1	0.00727628	78.816	MK(1)EMSAQER	2	0.18663	1
TRINITY_DN100835_c0_g1_m.1521	664	K	TRINITY_DN100835_c0_g1|g.1521 ORF TRINITY_DN100835_c0_g1|g.1521 TRINITY_DN100835_c0_g1_m.1521 type:complete len:1013 (+) TRINITY_DN100835_c0_g1:231-3269(+)	1	2.81177e-08	97.175	ELQSIVSQK(1)EEIAK	2	-2.9088	1
TRINITY_DN100838_c7_g2_m.1523	519	K	TRINITY_DN100838_c7_g2|g.1523 ORF TRINITY_DN100838_c7_g2|g.1523 TRINITY_DN100838_c7_g2_m.1523 type:complete len:820 (+) TRINITY_DN100838_c7_g2:105-2564(+)	1	0.00117768	83.438	FWNEFGK(1)SIK	2	-1.0792	1
TRINITY_DN100838_c7_g2_m.1523	549	K	TRINITY_DN100838_c7_g2|g.1523 ORF TRINITY_DN100838_c7_g2|g.1523 TRINITY_DN100838_c7_g2_m.1523 type:complete len:820 (+) TRINITY_DN100838_c7_g2:105-2564(+)	1	2.65125e-24	187.47	SEGK(1)LTSLDEYISR	2	-0.38343	1
TRINITY_DN100838_c7_g2_m.1523	565	K	TRINITY_DN100838_c7_g2|g.1523 ORF TRINITY_DN100838_c7_g2|g.1523 TRINITY_DN100838_c7_g2_m.1523 type:complete len:820 (+) TRINITY_DN100838_c7_g2:105-2564(+)	1	7.55794e-08	100.07	TGQK(1)DIFYITGTSK	2	-0.26282	1
TRINITY_DN100838_c7_g2_m.1523	129	K	TRINITY_DN100838_c7_g2|g.1523 ORF TRINITY_DN100838_c7_g2|g.1523 TRINITY_DN100838_c7_g2_m.1523 type:complete len:820 (+) TRINITY_DN100838_c7_g2:105-2564(+)	1	5.16783e-14	158.02	FLSLTDK(1)EVLGEGDNAK	2	1.3566	1
TRINITY_DN100838_c7_g2_m.1523	267	K	TRINITY_DN100838_c7_g2|g.1523 ORF TRINITY_DN100838_c7_g2|g.1523 TRINITY_DN100838_c7_g2_m.1523 type:complete len:820 (+) TRINITY_DN100838_c7_g2:105-2564(+)	1	0.0128336	74.486	EYLDENK(1)LK	2	-0.18205	1
TRINITY_DN100838_c7_g2_m.1523	413	K	TRINITY_DN100838_c7_g2|g.1523 ORF TRINITY_DN100838_c7_g2|g.1523 TRINITY_DN100838_c7_g2_m.1523 type:complete len:820 (+) TRINITY_DN100838_c7_g2:105-2564(+)	1	3.73004e-12	168.05	APSDLYESYYNTK(1)K	2	-2.1193	1
TRINITY_DN100838_c7_g2_m.1523	363	K	TRINITY_DN100838_c7_g2|g.1523 ORF TRINITY_DN100838_c7_g2|g.1523 TRINITY_DN100838_c7_g2_m.1523 type:complete len:820 (+) TRINITY_DN100838_c7_g2:105-2564(+)	1	2.27985e-10	110.91	EVTEEEYTK(1)FYHSISK	2	-2.6167	1
TRINITY_DN100838_c7_g2_m.1523	354	K	TRINITY_DN100838_c7_g2|g.1523 ORF TRINITY_DN100838_c7_g2|g.1523 TRINITY_DN100838_c7_g2_m.1523 type:complete len:820 (+) TRINITY_DN100838_c7_g2:105-2564(+)	1	4.52387e-22	190.68	SPK(1)EVTEEEYTK	2	-2.0149	1
TRINITY_DN100838_c7_g2_m.1523	575	K	TRINITY_DN100838_c7_g2|g.1523 ORF TRINITY_DN100838_c7_g2|g.1523 TRINITY_DN100838_c7_g2_m.1523 type:complete len:820 (+) TRINITY_DN100838_c7_g2:105-2564(+)	1	1.05405e-05	73.891	DIFYITGTSK(1)EQLEK	2	1.5164	1
TRINITY_DN100838_c7_g2_m.1523	522	K	TRINITY_DN100838_c7_g2|g.1523 ORF TRINITY_DN100838_c7_g2|g.1523 TRINITY_DN100838_c7_g2_m.1523 type:complete len:820 (+) TRINITY_DN100838_c7_g2:105-2564(+)	1	2.57486e-05	99.276	SIK(1)LGIIEDAQNR	2	-0.94683	1
TRINITY_DN100838_c7_g2_m.1523	580	K	TRINITY_DN100838_c7_g2|g.1523 ORF TRINITY_DN100838_c7_g2|g.1523 TRINITY_DN100838_c7_g2_m.1523 type:complete len:820 (+) TRINITY_DN100838_c7_g2:105-2564(+)	1	0.0037033	90.142	EQLEK(1)SPFLER	2	2.393	1
TRINITY_DN100838_c7_g2_m.1523	222	K	TRINITY_DN100838_c7_g2|g.1523 ORF TRINITY_DN100838_c7_g2|g.1523 TRINITY_DN100838_c7_g2_m.1523 type:complete len:820 (+) TRINITY_DN100838_c7_g2:105-2564(+)	1	0.00716552	59.731	HNDDK(1)QYVWESK	2	-0.43257	1
TRINITY_DN100838_c7_g2_m.1523	466	K	TRINITY_DN100838_c7_g2|g.1523 ORF TRINITY_DN100838_c7_g2|g.1523 TRINITY_DN100838_c7_g2_m.1523 type:complete len:820 (+) TRINITY_DN100838_c7_g2:105-2564(+)	1	1.64841e-41	218.12	EMLQQHSSLK(1)TIK	2	-1.5447	1
TRINITY_DN100838_c7_g2_m.1523	512	K	TRINITY_DN100838_c7_g2|g.1523 ORF TRINITY_DN100838_c7_g2|g.1523 TRINITY_DN100838_c7_g2_m.1523 type:complete len:820 (+) TRINITY_DN100838_c7_g2:105-2564(+)	0.994246	0.0635269	58.889	K(0.006)GQYTK(0.994)FWNEFGK	3	-2.6736	1
TRINITY_DN100838_c7_g2_m.1523	622	K	TRINITY_DN100838_c7_g2|g.1523 ORF TRINITY_DN100838_c7_g2|g.1523 TRINITY_DN100838_c7_g2_m.1523 type:complete len:820 (+) TRINITY_DN100838_c7_g2:105-2564(+)	1	4.21672e-17	153.52	HFQNVSK(1)EGLELGK	2	-2.3222	1
TRINITY_DN100838_c7_g2_m.1523	545	K	TRINITY_DN100838_c7_g2|g.1523 ORF TRINITY_DN100838_c7_g2|g.1523 TRINITY_DN100838_c7_g2_m.1523 type:complete len:820 (+) TRINITY_DN100838_c7_g2:105-2564(+)	1	0.00170855	86.205	FESTK(1)SEGK	2	0.3014	1
TRINITY_DN100838_c7_g2_m.1523	717	K	TRINITY_DN100838_c7_g2|g.1523 ORF TRINITY_DN100838_c7_g2|g.1523 TRINITY_DN100838_c7_g2_m.1523 type:complete len:820 (+) TRINITY_DN100838_c7_g2:105-2564(+)	1	0.0119645	56.014	HPIIK(1)ELR	2	-0.082149	1
TRINITY_DN100838_c7_g2_m.1523	164	K	TRINITY_DN100838_c7_g2|g.1523 ORF TRINITY_DN100838_c7_g2|g.1523 TRINITY_DN100838_c7_g2_m.1523 type:complete len:820 (+) TRINITY_DN100838_c7_g2:105-2564(+)	1	0.00844967	83.438	GIGMTK(1)EDLIK	2	0.62864	1
TRINITY_DN100838_c7_g2_m.1523	260	K	TRINITY_DN100838_c7_g2|g.1523 ORF TRINITY_DN100838_c7_g2|g.1523 TRINITY_DN100838_c7_g2_m.1523 type:complete len:820 (+) TRINITY_DN100838_c7_g2:105-2564(+)	1	6.09388e-07	129.69	DEAK(1)EYLDENK	2	-2.2092	1
TRINITY_DN100853_c0_g1_m.1554	38	K	TRINITY_DN100853_c0_g1|g.1554 ORF TRINITY_DN100853_c0_g1|g.1554 TRINITY_DN100853_c0_g1_m.1554 type:complete len:426 (+) TRINITY_DN100853_c0_g1:290-1567(+)	1	0.00118941	52.201	LPSLPK(1)QLEGVVSHEK	3	0.49758	1
TRINITY_DN100853_c0_g1_m.1554	231	K	TRINITY_DN100853_c0_g1|g.1554 ORF TRINITY_DN100853_c0_g1|g.1554 TRINITY_DN100853_c0_g1_m.1554 type:complete len:426 (+) TRINITY_DN100853_c0_g1:290-1567(+)	1	0.0241972	41.796	LAASLK(1)FPLK	2	-4.7477	1
TRINITY_DN100871_c1_g2_m.1578	134	K	TRINITY_DN100871_c1_g2|g.1578 ORF TRINITY_DN100871_c1_g2|g.1578 TRINITY_DN100871_c1_g2_m.1578 type:complete len:242 (+) TRINITY_DN100871_c1_g2:465-1190(+)	1	0.0062987	53.028	TQLEESK(1)IER	2	-1.3276	1
TRINITY_DN100882_c0_g1_m.1611	74	K	TRINITY_DN100882_c0_g1|g.1611 ORF TRINITY_DN100882_c0_g1|g.1611 TRINITY_DN100882_c0_g1_m.1611 type:complete len:524 (+) TRINITY_DN100882_c0_g1:111-1682(+)	1	0.0101286	59.77	TSK(1)VPNAQIITEHPSIR	3	-1.7227	1
TRINITY_DN100882_c0_g1_m.1611	476	K	TRINITY_DN100882_c0_g1|g.1611 ORF TRINITY_DN100882_c0_g1|g.1611 TRINITY_DN100882_c0_g1_m.1611 type:complete len:524 (+) TRINITY_DN100882_c0_g1:111-1682(+)	1	0.0522004	56.091	SPVNK(1)WK	2	-0.88196	1
TRINITY_DN100882_c0_g1_m.1611	135	K	TRINITY_DN100882_c0_g1|g.1611 ORF TRINITY_DN100882_c0_g1|g.1611 TRINITY_DN100882_c0_g1_m.1611 type:complete len:524 (+) TRINITY_DN100882_c0_g1:111-1682(+)	1	9.51276e-06	73.532	VHNTNSVLLGFVGGTEGLFAQK(1)ILK	3	5.2925	1
TRINITY_DN100882_c0_g1_m.1611	408	K	TRINITY_DN100882_c0_g1|g.1611 ORF TRINITY_DN100882_c0_g1|g.1611 TRINITY_DN100882_c0_g1_m.1611 type:complete len:524 (+) TRINITY_DN100882_c0_g1:111-1682(+)	1	6.57579e-07	110.52	LLAHLVENEMK(1)K	2	-4.4336	3
TRINITY_DN100882_c0_g1_m.1611	173	K	TRINITY_DN100882_c0_g1|g.1611 ORF TRINITY_DN100882_c0_g1|g.1611 TRINITY_DN100882_c0_g1_m.1611 type:complete len:524 (+) TRINITY_DN100882_c0_g1:111-1682(+)	1	1.23238e-05	52.201	TIEQVNAAK(1)AACEALK	2	-2.8886	1
TRINITY_DN100882_c0_g1_m.1611	16	K	TRINITY_DN100882_c0_g1|g.1611 ORF TRINITY_DN100882_c0_g1|g.1611 TRINITY_DN100882_c0_g1_m.1611 type:complete len:524 (+) TRINITY_DN100882_c0_g1:111-1682(+)	1	0.00446726	60.709	ELSDLQK(1)K	2	-0.36337	1
TRINITY_DN100882_c0_g1_m.1611	148	K	TRINITY_DN100882_c0_g1|g.1611 ORF TRINITY_DN100882_c0_g1|g.1611 TRINITY_DN100882_c0_g1_m.1611 type:complete len:524 (+) TRINITY_DN100882_c0_g1:111-1682(+)	1	4.07159e-14	148.62	ITDEVLSSYK(1)NQGGYDLLGR	2	-1.1753	1
TRINITY_DN100882_c0_g1_m.1611	515	K	TRINITY_DN100882_c0_g1|g.1611 ORF TRINITY_DN100882_c0_g1|g.1611 TRINITY_DN100882_c0_g1_m.1611 type:complete len:524 (+) TRINITY_DN100882_c0_g1:111-1682(+)	1	3.1445e-05	88.24	PAVHPASVDLK(1)GK	3	1.0809	2
TRINITY_DN100885_c2_g3_m.1615	128	K	TRINITY_DN100885_c2_g3|g.1615 ORF TRINITY_DN100885_c2_g3|g.1615 TRINITY_DN100885_c2_g3_m.1615 type:complete len:262 (+) TRINITY_DN100885_c2_g3:195-980(+)	1	0.00514112	96.51	MK(1)GDYYR	2	-0.67277	1
TRINITY_DN100885_c2_g3_m.1615	53	K	TRINITY_DN100885_c2_g3|g.1615 ORF TRINITY_DN100885_c2_g3|g.1615 TRINITY_DN100885_c2_g3_m.1615 type:complete len:262 (+) TRINITY_DN100885_c2_g3:195-980(+)	1	0.00427795	79.889	NLLSVGYK(1)NVIGAR	2	-0.9284	1
TRINITY_DN100885_c2_g3_m.1615	72	K	TRINITY_DN100885_c2_g3|g.1615 ORF TRINITY_DN100885_c2_g3|g.1615 TRINITY_DN100885_c2_g3_m.1615 type:complete len:262 (+) TRINITY_DN100885_c2_g3:195-980(+)	1	1.19522e-10	144.47	ILSSIEQK(1)EDAK	2	-0.62831	1
TRINITY_DN100885_c2_g3_m.1615	76	K	TRINITY_DN100885_c2_g3|g.1615 ORF TRINITY_DN100885_c2_g3|g.1615 TRINITY_DN100885_c2_g3_m.1615 type:complete len:262 (+) TRINITY_DN100885_c2_g3:195-980(+)	1	0.000882985	69.276	EDAK(1)GNEHHVK	2	0.83802	1
TRINITY_DN100885_c2_g3_m.1615	31	K	TRINITY_DN100885_c2_g3|g.1615 ORF TRINITY_DN100885_c2_g3|g.1615 TRINITY_DN100885_c2_g3_m.1615 type:complete len:262 (+) TRINITY_DN100885_c2_g3:195-980(+)	1	9.15159e-09	124.81	YDEMVDAMK(1)K	2	1.4065	3
TRINITY_DN100918_c2_g4_m.1676	95	K	TRINITY_DN100918_c2_g4|g.1676 ORF TRINITY_DN100918_c2_g4|g.1676 TRINITY_DN100918_c2_g4_m.1676 type:complete len:174 (+) TRINITY_DN100918_c2_g4:81-602(+)	1	1.36976e-07	107.46	TGK(1)DSIPITSTGHHYYICGFPR	3	-2.5989	2
TRINITY_DN100925_c0_g1_m.1685	60	K	TRINITY_DN100925_c0_g1|g.1685 ORF TRINITY_DN100925_c0_g1|g.1685 TRINITY_DN100925_c0_g1_m.1685 type:complete len:393 (+) TRINITY_DN100925_c0_g1:127-1305(+)	1	0.0344401	51.43	LQK(1)AELR	2	1.551	1
TRINITY_DN100950_c0_g1_m.1717	83	K	TRINITY_DN100950_c0_g1|g.1717 ORF TRINITY_DN100950_c0_g1|g.1717 TRINITY_DN100950_c0_g1_m.1717 type:complete len:303 (+) TRINITY_DN100950_c0_g1:172-1080(+)	1	2.23051e-06	97.084	AVLK(1)FAQYTGAHPIAGR	2	-4.1295	2
TRINITY_DN100950_c0_g1_m.1717	51	K	TRINITY_DN100950_c0_g1|g.1717 ORF TRINITY_DN100950_c0_g1|g.1717 TRINITY_DN100950_c0_g1_m.1717 type:complete len:303 (+) TRINITY_DN100950_c0_g1:172-1080(+)	1	2.79964e-09	140.05	TWEK(1)IQLAAR	2	-1.8356	1
TRINITY_DN100950_c0_g1_m.1717	188	K	TRINITY_DN100950_c0_g1|g.1717 ORF TRINITY_DN100950_c0_g1|g.1717 TRINITY_DN100950_c0_g1_m.1717 type:complete len:303 (+) TRINITY_DN100950_c0_g1:172-1080(+)	1	5.76447e-21	180.11	GTIAPGHK(1)WDVMVDLFFHR	3	1.3124	1
TRINITY_DN100950_c0_g1_m.1717	160	K	TRINITY_DN100950_c0_g1|g.1717 ORF TRINITY_DN100950_c0_g1|g.1717 TRINITY_DN100950_c0_g1_m.1717 type:complete len:303 (+) TRINITY_DN100950_c0_g1:172-1080(+)	1	0.000889772	72.365	FVDIGIPANNK(1)GK	2	1.058	1
TRINITY_DN100950_c0_g1_m.1717	47	K	TRINITY_DN100950_c0_g1|g.1717 ORF TRINITY_DN100950_c0_g1|g.1717 TRINITY_DN100950_c0_g1_m.1717 type:complete len:303 (+) TRINITY_DN100950_c0_g1:172-1080(+)	1	0.00387648	56.938	TDGIYIINLGK(1)TWEK	2	2.8251	1
TRINITY_DN100955_c1_g1_m.1730	367	K	TRINITY_DN100955_c1_g1|g.1730 ORF TRINITY_DN100955_c1_g1|g.1730 TRINITY_DN100955_c1_g1_m.1730 type:complete len:631 (+) TRINITY_DN100955_c1_g1:691-2583(+)	1	0.00395037	76.255	AEQDAQIGK(1)DSR	2	1.4393	1
TRINITY_DN100955_c1_g1_m.1730	324	K	TRINITY_DN100955_c1_g1|g.1730 ORF TRINITY_DN100955_c1_g1|g.1730 TRINITY_DN100955_c1_g1_m.1730 type:complete len:631 (+) TRINITY_DN100955_c1_g1:691-2583(+)	1	0.00302148	54.27	YTK(1)ECAEDVIK	2	-0.92282	1
TRINITY_DN100955_c1_g1_m.1730	392	K	TRINITY_DN100955_c1_g1|g.1730 ORF TRINITY_DN100955_c1_g1|g.1730 TRINITY_DN100955_c1_g1_m.1730 type:complete len:631 (+) TRINITY_DN100955_c1_g1:691-2583(+)	1	0.051427	52.591	LDK(1)SAVLK	2	-1.4316	1
TRINITY_DN100960_c1_g4_m.1734	126	K	TRINITY_DN100960_c1_g4|g.1734 ORF TRINITY_DN100960_c1_g4|g.1734 TRINITY_DN100960_c1_g4_m.1734 type:complete len:278 (+) TRINITY_DN100960_c1_g4:295-1128(+)	1	8.93995e-05	99.276	NK(1)HNEVETEIIK	2	-3.2167	1
TRINITY_DN100971_c0_g1_m.1757	103	K	TRINITY_DN100971_c0_g1|g.1757 ORF TRINITY_DN100971_c0_g1|g.1757 TRINITY_DN100971_c0_g1_m.1757 type:complete len:166 (-) TRINITY_DN100971_c0_g1:179-676(-)	1	5.23819e-65	288.39	NEAIWASK(1)TDGENGNYVIILQK	3	2.3982	2
TRINITY_DN100971_c0_g1_m.1757	145	K	TRINITY_DN100971_c0_g1|g.1757 ORF TRINITY_DN100971_c0_g1|g.1757 TRINITY_DN100971_c0_g1_m.1757 type:complete len:166 (-) TRINITY_DN100971_c0_g1:179-676(-)	1	0.00743578	83.623	FSSTAVVVAK(1)R	2	-0.26575	1
TRINITY_DN100971_c0_g1_m.1757	68	K	TRINITY_DN100971_c0_g1|g.1757 ORF TRINITY_DN100971_c0_g1|g.1757 TRINITY_DN100971_c0_g1_m.1757 type:complete len:166 (-) TRINITY_DN100971_c0_g1:179-676(-)	1	5.86938e-12	150.44	PEWATK(1)TANLGSR	2	-1.7939	1
TRINITY_DN100971_c0_g1_m.1757	41	K	TRINITY_DN100971_c0_g1|g.1757 ORF TRINITY_DN100971_c0_g1|g.1757 TRINITY_DN100971_c0_g1_m.1757 type:complete len:166 (-) TRINITY_DN100971_c0_g1:179-676(-)	1	4.16142e-15	207.88	LNPGNFLK(1)QDR	2	2.795	4
TRINITY_DN100971_c0_g1_m.1757	126	K	TRINITY_DN100971_c0_g1|g.1757 ORF TRINITY_DN100971_c0_g1|g.1757 TRINITY_DN100971_c0_g1_m.1757 type:complete len:166 (-) TRINITY_DN100971_c0_g1:179-676(-)	1	1.71532e-27	226.06	DGNLVLYSK(1)PIFATGTNR	2	5.892	5
TRINITY_DN100988_c0_g2_m.1794	359	K	TRINITY_DN100988_c0_g2|g.1794 ORF TRINITY_DN100988_c0_g2|g.1794 TRINITY_DN100988_c0_g2_m.1794 type:complete len:369 (+) TRINITY_DN100988_c0_g2:144-1250(+)	1	0.00305376	67.881	VELYK(1)GVPIK	2	0.71612	1
TRINITY_DN100988_c0_g2_m.1794	320	K	TRINITY_DN100988_c0_g2|g.1794 ORF TRINITY_DN100988_c0_g2|g.1794 TRINITY_DN100988_c0_g2_m.1794 type:complete len:369 (+) TRINITY_DN100988_c0_g2:144-1250(+)	1	0.000394269	48.892	LQPGYVTAWNNMGDAYEK(1)K	2	-3.5681	1
TRINITY_DN100999_c1_g1_m.1813	104	K	TRINITY_DN100999_c1_g1|g.1813 ORF TRINITY_DN100999_c1_g1|g.1813 TRINITY_DN100999_c1_g1_m.1813 type:3prime_partial len:241 (+) TRINITY_DN100999_c1_g1:274-993(+)	1	2.70984e-06	66.485	VIAGPGDK(1)PMIVVTYK	2	1.9621	1
TRINITY_DN100999_c1_g1_m.1813	74	K	TRINITY_DN100999_c1_g1|g.1813 ORF TRINITY_DN100999_c1_g1|g.1813 TRINITY_DN100999_c1_g1_m.1813 type:3prime_partial len:241 (+) TRINITY_DN100999_c1_g1:274-993(+)	1	1.1934e-34	191.95	NQVAMNPVNTVFDAK(1)R	2	-1.3813	4
TRINITY_DN100999_c1_g1_m.1813	130	K	TRINITY_DN100999_c1_g1|g.1813 ORF TRINITY_DN100999_c1_g1|g.1813 TRINITY_DN100999_c1_g1_m.1813 type:3prime_partial len:241 (+) TRINITY_DN100999_c1_g1:274-993(+)	1	2.06721e-34	184.65	QFSPEEISSMVLTK(1)MK	2	3.4224	1
TRINITY_DN100999_c1_g1_m.1813	91	K	TRINITY_DN100999_c1_g1|g.1813 ORF TRINITY_DN100999_c1_g1|g.1813 TRINITY_DN100999_c1_g1_m.1813 type:3prime_partial len:241 (+) TRINITY_DN100999_c1_g1:274-993(+)	1	7.75965e-13	106.47	FSDPSVQSDMK(1)LWPFK	2	1.5768	1
TRINITY_DN100999_c1_g1_m.1813	112	K	TRINITY_DN100999_c1_g1|g.1813 ORF TRINITY_DN100999_c1_g1|g.1813 TRINITY_DN100999_c1_g1_m.1813 type:3prime_partial len:241 (+) TRINITY_DN100999_c1_g1:274-993(+)	0.999996	1.8808e-06	93.777	VIAGPGDKPMIVVTYK(1)GEEK	3	-0.32852	2
TRINITY_DN100999_c1_g1_m.1813	163	K	TRINITY_DN100999_c1_g1|g.1813 ORF TRINITY_DN100999_c1_g1|g.1813 TRINITY_DN100999_c1_g1_m.1813 type:3prime_partial len:241 (+) TRINITY_DN100999_c1_g1:274-993(+)	1	8.81273e-14	170.22	QATK(1)DAGVISGLNVMR	2	-7.0264	2
TRINITY_DN100999_c1_g1_m.1813	141	K	TRINITY_DN100999_c1_g1|g.1813 ORF TRINITY_DN100999_c1_g1|g.1813 TRINITY_DN100999_c1_g1_m.1813 type:3prime_partial len:241 (+) TRINITY_DN100999_c1_g1:274-993(+)	1	7.89128e-07	117.99	EIAEAFLGK(1)TVK	2	-3.8776	2
TRINITY_DN100999_c1_g1_m.1813	144	K	TRINITY_DN100999_c1_g1|g.1813 ORF TRINITY_DN100999_c1_g1|g.1813 TRINITY_DN100999_c1_g1_m.1813 type:3prime_partial len:241 (+) TRINITY_DN100999_c1_g1:274-993(+)	1	7.09711e-06	78.888	TVK(1)NAVVTVPAYFNDSQR	2	1.5714	2
TRINITY_DN100999_c1_g1_m.1813	132	K	TRINITY_DN100999_c1_g1|g.1813 ORF TRINITY_DN100999_c1_g1|g.1813 TRINITY_DN100999_c1_g1_m.1813 type:3prime_partial len:241 (+) TRINITY_DN100999_c1_g1:274-993(+)	1	0.000153359	119.94	MK(1)EIAEAFLGK	2	-1.254	2
TRINITY_DN101011_c6_g1_m.1843	246	K	TRINITY_DN101011_c6_g1|g.1843 ORF TRINITY_DN101011_c6_g1|g.1843 TRINITY_DN101011_c6_g1_m.1843 type:5prime_partial len:431 (+) TRINITY_DN101011_c6_g1:1-1293(+)	1	7.92455e-05	106.11	FK(1)DIFQEVYESK	2	2.2042	1
TRINITY_DN101011_c6_g1_m.1843	225	K	TRINITY_DN101011_c6_g1|g.1843 ORF TRINITY_DN101011_c6_g1|g.1843 TRINITY_DN101011_c6_g1_m.1843 type:5prime_partial len:431 (+) TRINITY_DN101011_c6_g1:1-1293(+)	1	4.48044e-09	127.03	AFADASMNTAFQK(1)K	2	-3.0733	2
TRINITY_DN101011_c6_g1_m.1843	234	K	TRINITY_DN101011_c6_g1|g.1843 ORF TRINITY_DN101011_c6_g1|g.1843 TRINITY_DN101011_c6_g1_m.1843 type:5prime_partial len:431 (+) TRINITY_DN101011_c6_g1:1-1293(+)	1	0.00833605	52.863	WPLYLSTK(1)NTILK	2	1.7465	1
TRINITY_DN101011_c6_g1_m.1843	139	K	TRINITY_DN101011_c6_g1|g.1843 ORF TRINITY_DN101011_c6_g1|g.1843 TRINITY_DN101011_c6_g1_m.1843 type:5prime_partial len:431 (+) TRINITY_DN101011_c6_g1:1-1293(+)	1	0.00141899	86.205	EPILCK(1)NVPR	2	1.9132	1
TRINITY_DN101011_c6_g1_m.1843	396	K	TRINITY_DN101011_c6_g1|g.1843 ORF TRINITY_DN101011_c6_g1|g.1843 TRINITY_DN101011_c6_g1_m.1843 type:5prime_partial len:431 (+) TRINITY_DN101011_c6_g1:1-1293(+)	1	4.2913e-08	90.156	MTK(1)DLALIIHGSNLK	2	-0.81015	2
TRINITY_DN101011_c6_g1_m.1843	79	K	TRINITY_DN101011_c6_g1|g.1843 ORF TRINITY_DN101011_c6_g1|g.1843 TRINITY_DN101011_c6_g1_m.1843 type:5prime_partial len:431 (+) TRINITY_DN101011_c6_g1:1-1293(+)	1	6.88208e-05	74.733	DSTDDK(1)VTVESAEATLK	2	-1.2098	1
TRINITY_DN101011_c6_g1_m.1843	258	K	TRINITY_DN101011_c6_g1|g.1843 ORF TRINITY_DN101011_c6_g1|g.1843 TRINITY_DN101011_c6_g1_m.1843 type:5prime_partial len:431 (+) TRINITY_DN101011_c6_g1:1-1293(+)	1	8.26033e-09	168.43	WK(1)SLFEDSGIWYEHR	3	1.352	1
TRINITY_DN101011_c6_g1_m.1843	408	K	TRINITY_DN101011_c6_g1|g.1843 ORF TRINITY_DN101011_c6_g1|g.1843 TRINITY_DN101011_c6_g1_m.1843 type:5prime_partial len:431 (+) TRINITY_DN101011_c6_g1:1-1293(+)	1	5.09493e-11	104.04	DLALIIHGSNLK(1)R	2	1.9761	1
TRINITY_DN101011_c6_g1_m.1843	177	K	TRINITY_DN101011_c6_g1|g.1843 ORF TRINITY_DN101011_c6_g1|g.1843 TRINITY_DN101011_c6_g1_m.1843 type:5prime_partial len:431 (+) TRINITY_DN101011_c6_g1:1-1293(+)	1	0.0515963	43.734	LK(1)LVFEGK	2	-4.2562	1
TRINITY_DN101011_c6_g1_m.1843	256	K	TRINITY_DN101011_c6_g1|g.1843 ORF TRINITY_DN101011_c6_g1|g.1843 TRINITY_DN101011_c6_g1_m.1843 type:5prime_partial len:431 (+) TRINITY_DN101011_c6_g1:1-1293(+)	1	0.000456904	57.293	DIFQEVYESK(1)WK	2	2.1778	1
TRINITY_DN101011_c6_g1_m.1843	96	K	TRINITY_DN101011_c6_g1|g.1843 ORF TRINITY_DN101011_c6_g1|g.1843 TRINITY_DN101011_c6_g1_m.1843 type:5prime_partial len:431 (+) TRINITY_DN101011_c6_g1:1-1293(+)	1	0.0102049	58.338	YNVAIK(1)CATITPDEAR	2	-1.9693	1
TRINITY_DN101011_c6_g1_m.1843	29	K	TRINITY_DN101011_c6_g1|g.1843 ORF TRINITY_DN101011_c6_g1|g.1843 TRINITY_DN101011_c6_g1_m.1843 type:5prime_partial len:431 (+) TRINITY_DN101011_c6_g1:1-1293(+)	1	4.60279e-09	99.909	IK(1)VTSPIVEMDGDEMTR	2	-0.95605	1
TRINITY_DN101048_c1_g1_m.1917	328	K	TRINITY_DN101048_c1_g1|g.1917 ORF TRINITY_DN101048_c1_g1|g.1917 TRINITY_DN101048_c1_g1_m.1917 type:complete len:364 (+) TRINITY_DN101048_c1_g1:149-1240(+)	1	0.000523254	91.245	LESLK(1)LNSSDAALK	2	-0.57622	1
TRINITY_DN101071_c1_g1_m.1963	48	K	TRINITY_DN101071_c1_g1|g.1963 ORF TRINITY_DN101071_c1_g1|g.1963 TRINITY_DN101071_c1_g1_m.1963 type:complete len:227 (+) TRINITY_DN101071_c1_g1:189-869(+)	1	0.0122483	50.834	LMIK(1)ADEER	2	0.93733	1
TRINITY_DN101075_c0_g1_m.1969	395	K	TRINITY_DN101075_c0_g1|g.1969 ORF TRINITY_DN101075_c0_g1|g.1969 TRINITY_DN101075_c0_g1_m.1969 type:5prime_partial len:845 (+) TRINITY_DN101075_c0_g1:2-2536(+)	1	0.0404384	42.075	SHK(1)DLDK	2	-1.8889	1
TRINITY_DN101077_c2_g1_m.1974	926	K	TRINITY_DN101077_c2_g1|g.1974 ORF TRINITY_DN101077_c2_g1|g.1974 TRINITY_DN101077_c2_g1_m.1974 type:complete len:1001 (+) TRINITY_DN101077_c2_g1:208-3210(+)	1	0.00556869	57.032	VLPAQEK(1)HIR	2	-1.2732	1
TRINITY_DN101077_c2_g1_m.1974	126	K	TRINITY_DN101077_c2_g1|g.1974 ORF TRINITY_DN101077_c2_g1|g.1974 TRINITY_DN101077_c2_g1_m.1974 type:complete len:1001 (+) TRINITY_DN101077_c2_g1:208-3210(+)	1	0.00714852	44.598	MGEEGAK(1)IDPR	2	-0.80568	1
TRINITY_DN101077_c2_g1_m.1974	734	K	TRINITY_DN101077_c2_g1|g.1974 ORF TRINITY_DN101077_c2_g1|g.1974 TRINITY_DN101077_c2_g1_m.1974 type:complete len:1001 (+) TRINITY_DN101077_c2_g1:208-3210(+)	1	0.0107491	58.313	IIQDK(1)HEDTMSK	2	-2.7506	1
TRINITY_DN101077_c2_g1_m.1974	557	K	TRINITY_DN101077_c2_g1|g.1974 ORF TRINITY_DN101077_c2_g1|g.1974 TRINITY_DN101077_c2_g1_m.1974 type:complete len:1001 (+) TRINITY_DN101077_c2_g1:208-3210(+)	1	0.000798009	43.177	ASEMLAYAHETQHEK(1)IIR	3	-0.87906	1
TRINITY_DN101092_c0_g2_m.2000	356	K	TRINITY_DN101092_c0_g2|g.2000 ORF TRINITY_DN101092_c0_g2|g.2000 TRINITY_DN101092_c0_g2_m.2000 type:complete len:520 (+) TRINITY_DN101092_c0_g2:154-1713(+)	1	8.959e-05	66.509	GK(1)QLAALHALGSIAGAGR	2	-3.1467	1
TRINITY_DN101092_c0_g2_m.2000	497	K	TRINITY_DN101092_c0_g2|g.2000 ORF TRINITY_DN101092_c0_g2|g.2000 TRINITY_DN101092_c0_g2_m.2000 type:complete len:520 (+) TRINITY_DN101092_c0_g2:154-1713(+)	1	0.0200697	58.687	LQEAVK(1)R	2	-1.5344	1
TRINITY_DN101092_c0_g2_m.2000	284	K	TRINITY_DN101092_c0_g2|g.2000 ORF TRINITY_DN101092_c0_g2|g.2000 TRINITY_DN101092_c0_g2_m.2000 type:complete len:520 (+) TRINITY_DN101092_c0_g2:154-1713(+)	1	0.00106977	55.782	LLSSTDAYK(1)TIDQSR	2	-3.2499	1
TRINITY_DN101103_c1_g2_m.2021	201	K	TRINITY_DN101103_c1_g2|g.2021 ORF TRINITY_DN101103_c1_g2|g.2021 TRINITY_DN101103_c1_g2_m.2021 type:complete len:310 (+) TRINITY_DN101103_c1_g2:200-1129(+)	1	0.000852141	102.55	GGVNTK(1)QICR	2	0.49918	1
TRINITY_DN101103_c1_g2_m.2021	210	K	TRINITY_DN101103_c1_g2|g.2021 ORF TRINITY_DN101103_c1_g2|g.2021 TRINITY_DN101103_c1_g2_m.2021 type:complete len:310 (+) TRINITY_DN101103_c1_g2:200-1129(+)	1	0.00232813	67.464	LTGAK(1)LFIR	2	-1.3075	1
TRINITY_DN101113_c0_g1_m.2042	355	K	TRINITY_DN101113_c0_g1|g.2042 ORF TRINITY_DN101113_c0_g1|g.2042 TRINITY_DN101113_c0_g1_m.2042 type:complete len:773 (+) TRINITY_DN101113_c0_g1:136-2454(+)	1	0.00158839	62.271	LYAVSTTSTSK(1)R	2	-0.77909	1
TRINITY_DN101162_c3_g1_m.2140	23	K	TRINITY_DN101162_c3_g1|g.2140 ORF TRINITY_DN101162_c3_g1|g.2140 TRINITY_DN101162_c3_g1_m.2140 type:complete len:147 (+) TRINITY_DN101162_c3_g1:193-633(+)	1	1.06828e-44	208.35	SFVGDETAFNK(1)SIDGR	2	-0.48001	1
TRINITY_DN101186_c1_g1_m.2184	182	K	TRINITY_DN101186_c1_g1|g.2184 ORF TRINITY_DN101186_c1_g1|g.2184 TRINITY_DN101186_c1_g1_m.2184 type:complete len:532 (+) TRINITY_DN101186_c1_g1:85-1680(+)	1	4.1982e-05	96.946	YK(1)VIILDEAHER	2	-3.7853	1
TRINITY_DN101258_c0_g1_m.2338	348	K	TRINITY_DN101258_c0_g1|g.2338 ORF TRINITY_DN101258_c0_g1|g.2338 TRINITY_DN101258_c0_g1_m.2338 type:5prime_partial len:477 (+) TRINITY_DN101258_c0_g1:1-1431(+)	1	0.00107919	58.313	LHPDQEGFSK(1)QEAVR	3	0.29138	1
TRINITY_DN101261_c2_g1_m.2346	140	K	TRINITY_DN101261_c2_g1|g.2346 ORF TRINITY_DN101261_c2_g1|g.2346 TRINITY_DN101261_c2_g1_m.2346 type:complete len:339 (+) TRINITY_DN101261_c2_g1:479-1495(+)	1	0.00754938	81.642	EISHQFK(1)VK	2	-1.3142	1
TRINITY_DN101271_c0_g2_m.2366	345	K	TRINITY_DN101271_c0_g2|g.2366 ORF TRINITY_DN101271_c0_g2|g.2366 TRINITY_DN101271_c0_g2_m.2366 type:complete len:362 (+) TRINITY_DN101271_c0_g2:97-1182(+)	1	0.0463479	63.301	LAK(1)GDVR	2	1.1647	1
TRINITY_DN101271_c0_g2_m.2366	224	K	TRINITY_DN101271_c0_g2|g.2366 ORF TRINITY_DN101271_c0_g2|g.2366 TRINITY_DN101271_c0_g2_m.2366 type:complete len:362 (+) TRINITY_DN101271_c0_g2:97-1182(+)	0.995815	0.0193228	88.921	K(0.004)K(0.996)EAIER	2	0.1272	1
TRINITY_DN101271_c0_g2_m.2366	222	K	TRINITY_DN101271_c0_g2|g.2366 ORF TRINITY_DN101271_c0_g2|g.2366 TRINITY_DN101271_c0_g2_m.2366 type:complete len:362 (+) TRINITY_DN101271_c0_g2:97-1182(+)	1	0.00247369	68.49	VTVISTSSSK(1)K	2	-1.2258	1
TRINITY_DN101271_c0_g2_m.2366	15	K	TRINITY_DN101271_c0_g2|g.2366 ORF TRINITY_DN101271_c0_g2|g.2366 TRINITY_DN101271_c0_g2_m.2366 type:complete len:362 (+) TRINITY_DN101271_c0_g2:97-1182(+)	1	0.0529867	46.835	K(1)AFGWAAR	2	-0.91517	1
TRINITY_DN101283_c1_g1_m.2388	8	K	TRINITY_DN101283_c1_g1|g.2388 ORF TRINITY_DN101283_c1_g1|g.2388 TRINITY_DN101283_c1_g1_m.2388 type:complete len:1218 (+) TRINITY_DN101283_c1_g1:324-3977(+)	1	0.0055367	89.123	FETK(1)SNR	2	0.34147	1
TRINITY_DN101283_c1_g1_m.2388	645	K	TRINITY_DN101283_c1_g1|g.2388 ORF TRINITY_DN101283_c1_g1|g.2388 TRINITY_DN101283_c1_g1_m.2388 type:complete len:1218 (+) TRINITY_DN101283_c1_g1:324-3977(+)	1	3.27686e-05	65.12	GFPEVALHFVK(1)DER	2	0.686	1
TRINITY_DN101312_c0_g1_m.2433	264	K	TRINITY_DN101312_c0_g1|g.2433 ORF TRINITY_DN101312_c0_g1|g.2433 TRINITY_DN101312_c0_g1_m.2433 type:complete len:294 (+) TRINITY_DN101312_c0_g1:126-1007(+)	1	0.00491841	55.782	DHSEDTK(1)AIVEHSTSIK	2	-2.4234	1
TRINITY_DN101313_c4_g1_m.2434	198	K	TRINITY_DN101313_c4_g1|g.2434 ORF TRINITY_DN101313_c4_g1|g.2434 TRINITY_DN101313_c4_g1_m.2434 type:complete len:299 (+) TRINITY_DN101313_c4_g1:153-1049(+)	1	2.98777e-05	71.896	ANATISIVHSK(1)TK	2	-3.871	1
TRINITY_DN101313_c4_g1_m.2434	31	K	TRINITY_DN101313_c4_g1|g.2434 ORF TRINITY_DN101313_c4_g1|g.2434 TRINITY_DN101313_c4_g1_m.2434 type:complete len:299 (+) TRINITY_DN101313_c4_g1:153-1049(+)	1	2.20875e-09	100.6	IK(1)DSTGIVPGLAVILVGSR	2	3.2472	1
TRINITY_DN101319_c6_g1_m.2455	339	K	TRINITY_DN101319_c6_g1|g.2455 ORF TRINITY_DN101319_c6_g1|g.2455 TRINITY_DN101319_c6_g1_m.2455 type:complete len:455 (+) TRINITY_DN101319_c6_g1:159-1523(+)	1	2.61294e-09	106.58	YK(1)QEVLLGQLDWSPMHK	2	-0.83462	2
TRINITY_DN101319_c6_g1_m.2455	43	K	TRINITY_DN101319_c6_g1|g.2455 ORF TRINITY_DN101319_c6_g1|g.2455 TRINITY_DN101319_c6_g1_m.2455 type:complete len:455 (+) TRINITY_DN101319_c6_g1:159-1523(+)	1	0.000543845	95.311	YDNK(1)SESQR	2	-0.23984	1
TRINITY_DN101319_c6_g1_m.2455	422	K	TRINITY_DN101319_c6_g1|g.2455 ORF TRINITY_DN101319_c6_g1|g.2455 TRINITY_DN101319_c6_g1_m.2455 type:complete len:455 (+) TRINITY_DN101319_c6_g1:159-1523(+)	1	0.0065108	46.768	VMK(1)LMNHENAEVTK	2	-2.8879	1
TRINITY_DN101325_c2_g5_m.2467	23	K	TRINITY_DN101325_c2_g5|g.2467 ORF TRINITY_DN101325_c2_g5|g.2467 TRINITY_DN101325_c2_g5_m.2467 type:complete len:178 (+) TRINITY_DN101325_c2_g5:2491-3024(+)	1	1.29884e-07	112.93	ANVYLDSSGK(1)HNK	2	-1.8559	1
TRINITY_DN101332_c0_g5_m.2479	176	K	TRINITY_DN101332_c0_g5|g.2479 ORF TRINITY_DN101332_c0_g5|g.2479 TRINITY_DN101332_c0_g5_m.2479 type:5prime_partial len:296 (+) TRINITY_DN101332_c0_g5:1-888(+)	1	3.43233e-11	106.35	FIFCVENLVVK(1)HK	2	4.3169	2
TRINITY_DN101354_c0_g2_m.2518	27	K	TRINITY_DN101354_c0_g2|g.2518 ORF TRINITY_DN101354_c0_g2|g.2518 TRINITY_DN101354_c0_g2_m.2518 type:complete len:307 (+) TRINITY_DN101354_c0_g2:138-1058(+)	1	0.00253295	68.108	HIVAASAK(1)LGHATFVLVR	3	0.5015	1
TRINITY_DN101354_c0_g2_m.2518	234	K	TRINITY_DN101354_c0_g2|g.2518 ORF TRINITY_DN101354_c0_g2|g.2518 TRINITY_DN101354_c0_g2_m.2518 type:complete len:307 (+) TRINITY_DN101354_c0_g2:138-1058(+)	1	0.00838461	81.163	TGK(1)TLER	2	0.63218	2
TRINITY_DN101354_c0_g2_m.2518	7	K	TRINITY_DN101354_c0_g2|g.2518 ORF TRINITY_DN101354_c0_g2|g.2518 TRINITY_DN101354_c0_g2_m.2518 type:complete len:307 (+) TRINITY_DN101354_c0_g2:138-1058(+)	1	0.00585624	55.604	SK(1)ILIIGGTGYIGK	2	1.3213	1
TRINITY_DN101354_c0_g2_m.2518	107	K	TRINITY_DN101354_c0_g2|g.2518 ORF TRINITY_DN101354_c0_g2|g.2518 TRINITY_DN101354_c0_g2_m.2518 type:complete len:307 (+) TRINITY_DN101354_c0_g2:138-1058(+)	1	0.0068432	105.22	ETGNIK(1)R	2	0.27809	1
TRINITY_DN101356_c0_g1_m.2523	349	K	TRINITY_DN101356_c0_g1|g.2523 ORF TRINITY_DN101356_c0_g1|g.2523 TRINITY_DN101356_c0_g1_m.2523 type:complete len:451 (+) TRINITY_DN101356_c0_g1:155-1507(+)	1	0.00202699	83.438	YHLDEDPK(1)TLK	2	-2.9317	1
TRINITY_DN101367_c0_g1_m.2542	1114	K	TRINITY_DN101367_c0_g1|g.2542 ORF TRINITY_DN101367_c0_g1|g.2542 TRINITY_DN101367_c0_g1_m.2542 type:complete len:1396 (+) TRINITY_DN101367_c0_g1:95-4282(+)	1	0.0413794	47.334	TIGSK(1)LEASLAR	2	0.26893	1
TRINITY_DN101367_c0_g1_m.2542	168	K	TRINITY_DN101367_c0_g1|g.2542 ORF TRINITY_DN101367_c0_g1|g.2542 TRINITY_DN101367_c0_g1_m.2542 type:complete len:1396 (+) TRINITY_DN101367_c0_g1:95-4282(+)	1	0.0285717	45.489	LPSSK(1)LPR	2	-0.12336	1
TRINITY_DN101367_c0_g1_m.2542	1153	K	TRINITY_DN101367_c0_g1|g.2542 ORF TRINITY_DN101367_c0_g1|g.2542 TRINITY_DN101367_c0_g1_m.2542 type:complete len:1396 (+) TRINITY_DN101367_c0_g1:95-4282(+)	1	0.00883232	55.782	SNLESSVVPAFEK(1)SSR	2	-3.6378	1
TRINITY_DN101391_c4_g1_m.2594	300	K	TRINITY_DN101391_c4_g1|g.2594 ORF TRINITY_DN101391_c4_g1|g.2594 TRINITY_DN101391_c4_g1_m.2594 type:5prime_partial len:386 (+) TRINITY_DN101391_c4_g1:3-1160(+)	1	0.00402771	63.212	EVEK(1)MVMEVEER	2	-8.9021	1
TRINITY_DN101406_c0_g1_m.2618	98	K	TRINITY_DN101406_c0_g1|g.2618 ORF TRINITY_DN101406_c0_g1|g.2618 TRINITY_DN101406_c0_g1_m.2618 type:complete len:481 (+) TRINITY_DN101406_c0_g1:41-1483(+)	1	0.00666533	53.363	FDQYSGYVTVDPTK(1)GR	2	-0.82381	1
TRINITY_DN101407_c0_g1_m.2619	53	K	TRINITY_DN101407_c0_g1|g.2619 ORF TRINITY_DN101407_c0_g1|g.2619 TRINITY_DN101407_c0_g1_m.2619 type:5prime_partial len:493 (+) TRINITY_DN101407_c0_g1:2-1480(+)	1	0.00893822	49.967	FAEHK(1)AGVSPELDEAR	2	-2.1251	1
TRINITY_DN101407_c0_g1_m.2619	270	K	TRINITY_DN101407_c0_g1|g.2619 ORF TRINITY_DN101407_c0_g1|g.2619 TRINITY_DN101407_c0_g1_m.2619 type:5prime_partial len:493 (+) TRINITY_DN101407_c0_g1:2-1480(+)	1	0.0591461	40.533	ALGLQDEK(1)DVEK	2	-1.927	1
TRINITY_DN101419_c5_g1_m.2655	209	K	TRINITY_DN101419_c5_g1|g.2655 ORF TRINITY_DN101419_c5_g1|g.2655 TRINITY_DN101419_c5_g1_m.2655 type:complete len:346 (+) TRINITY_DN101419_c5_g1:177-1214(+)	1	6.3277e-23	181.87	FGFDEAFNYK(1)EER	2	2.571	1
TRINITY_DN101419_c5_g1_m.2655	337	K	TRINITY_DN101419_c5_g1|g.2655 ORF TRINITY_DN101419_c5_g1|g.2655 TRINITY_DN101419_c5_g1_m.2655 type:complete len:346 (+) TRINITY_DN101419_c5_g1:177-1214(+)	1	8.15553e-05	85.622	NVGK(1)QVVLIAHE	2	-0.21256	1
TRINITY_DN101419_c5_g1_m.2655	219	K	TRINITY_DN101419_c5_g1|g.2655 ORF TRINITY_DN101419_c5_g1|g.2655 TRINITY_DN101419_c5_g1_m.2655 type:complete len:346 (+) TRINITY_DN101419_c5_g1:177-1214(+)	1	0.0229859	44.767	DLNAALK(1)R	2	0.75242	1
TRINITY_DN101419_c5_g1_m.2655	199	K	TRINITY_DN101419_c5_g1|g.2655 ORF TRINITY_DN101419_c5_g1|g.2655 TRINITY_DN101419_c5_g1_m.2655 type:complete len:346 (+) TRINITY_DN101419_c5_g1:177-1214(+)	1	8.75023e-16	211.84	SK(1)FGFDEAFNYK	2	-1.3051	2
TRINITY_DN101419_c5_g1_m.2655	14	K	TRINITY_DN101419_c5_g1|g.2655 ORF TRINITY_DN101419_c5_g1|g.2655 TRINITY_DN101419_c5_g1_m.2655 type:complete len:346 (+) TRINITY_DN101419_c5_g1:177-1214(+)	1	4.54094e-05	82.437	ITLK(1)DYVTGYPK	2	-2.0306	1
TRINITY_DN101419_c5_g1_m.2655	121	K	TRINITY_DN101419_c5_g1|g.2655 ORF TRINITY_DN101419_c5_g1|g.2655 TRINITY_DN101419_c5_g1_m.2655 type:complete len:346 (+) TRINITY_DN101419_c5_g1:177-1214(+)	1	0.00379857	60.892	APEFLVK(1)IK	2	-3.475	1
TRINITY_DN101426_c1_g1_m.2666	149	K	TRINITY_DN101426_c1_g1|g.2666 ORF TRINITY_DN101426_c1_g1|g.2666 TRINITY_DN101426_c1_g1_m.2666 type:complete len:225 (+) TRINITY_DN101426_c1_g1:194-868(+)	1	2.27194e-06	84.102	LK(1)LVDTSSAETEFAR	2	-2.0941	1
TRINITY_DN101426_c1_g1_m.2666	49	K	TRINITY_DN101426_c1_g1|g.2666 ORF TRINITY_DN101426_c1_g1|g.2666 TRINITY_DN101426_c1_g1_m.2666 type:complete len:225 (+) TRINITY_DN101426_c1_g1:194-868(+)	0.999428	1.08529e-05	89.359	LPSK(0.001)PDPK(0.999)DAVGTAR	3	-0.70756	1
TRINITY_DN101426_c1_g1_m.2666	168	K	TRINITY_DN101426_c1_g1|g.2666 ORF TRINITY_DN101426_c1_g1|g.2666 TRINITY_DN101426_c1_g1_m.2666 type:complete len:225 (+) TRINITY_DN101426_c1_g1:194-868(+)	1	0.0283858	41.284	NALFAK(1)HPEMQDWPSGHDFK	3	1.7065	1
TRINITY_DN101438_c0_g1_m.2694	540	K	TRINITY_DN101438_c0_g1|g.2694 ORF TRINITY_DN101438_c0_g1|g.2694 TRINITY_DN101438_c0_g1_m.2694 type:complete len:617 (+) TRINITY_DN101438_c0_g1:169-2019(+)	1	0.0113576	64.064	AAGEVLALQK(1)R	2	-2.4119	1
TRINITY_DN101441_c1_g1_m.2702	10	K	TRINITY_DN101441_c1_g1|g.2702 ORF TRINITY_DN101441_c1_g1|g.2702 TRINITY_DN101441_c1_g1_m.2702 type:complete len:220 (+) TRINITY_DN101441_c1_g1:239-898(+)	1	0.000172817	79.235	PK(1)EQTNALATLDK	2	-2.5044	1
TRINITY_DN101443_c1_g2_m.2706	138	K	TRINITY_DN101443_c1_g2|g.2706 ORF TRINITY_DN101443_c1_g2|g.2706 TRINITY_DN101443_c1_g2_m.2706 type:5prime_partial len:201 (+) TRINITY_DN101443_c1_g2:1-603(+)	1	0.00019415	80.128	NMGEILK(1)ASGASYSSVVK	2	-4.6229	1
TRINITY_DN101450_c0_g1_m.2721	100	K	TRINITY_DN101450_c0_g1|g.2721 ORF TRINITY_DN101450_c0_g1|g.2721 TRINITY_DN101450_c0_g1_m.2721 type:complete len:393 (+) TRINITY_DN101450_c0_g1:186-1364(+)	1	3.10392e-17	185.9	AK(1)GEAFEEIVGLAR	2	1.7385	1
TRINITY_DN101471_c1_g1_m.2763	505	K	TRINITY_DN101471_c1_g1|g.2763 ORF TRINITY_DN101471_c1_g1|g.2763 TRINITY_DN101471_c1_g1_m.2763 type:complete len:905 (+) TRINITY_DN101471_c1_g1:1572-4286(+)	1	0.0315907	63.908	QISTAVSGPVTK(1)EGR	2	3.0714	1
TRINITY_DN101489_c0_g1_m.2802	403	K	TRINITY_DN101489_c0_g1|g.2802 ORF TRINITY_DN101489_c0_g1|g.2802 TRINITY_DN101489_c0_g1_m.2802 type:complete len:648 (+) TRINITY_DN101489_c0_g1:168-2111(+)	1	2.71521e-06	110.88	SIQEQSEQK(1)LR	2	-1.614	1
TRINITY_DN101489_c0_g1_m.2802	488	K	TRINITY_DN101489_c0_g1|g.2802 ORF TRINITY_DN101489_c0_g1|g.2802 TRINITY_DN101489_c0_g1_m.2802 type:complete len:648 (+) TRINITY_DN101489_c0_g1:168-2111(+)	1	1.6106e-06	73.305	LALGTLALEDALSK(1)GLPIR	2	1.3987	1
TRINITY_DN101489_c0_g1_m.2802	394	K	TRINITY_DN101489_c0_g1|g.2802 ORF TRINITY_DN101489_c0_g1|g.2802 TRINITY_DN101489_c0_g1_m.2802 type:complete len:648 (+) TRINITY_DN101489_c0_g1:168-2111(+)	1	0.000376673	75.5	AAATIK(1)SIQEQSEQK	2	-2.9224	1
TRINITY_DN101499_c1_g1_m.2832	54	K	TRINITY_DN101499_c1_g1|g.2832 ORF TRINITY_DN101499_c1_g1|g.2832 TRINITY_DN101499_c1_g1_m.2832 type:3prime_partial len:114 (+) TRINITY_DN101499_c1_g1:151-489(+)	1	1.12506e-05	136.06	VLK(1)DESSLEENK	2	-1.7993	1
TRINITY_DN101511_c0_g1_m.2846	207	K	TRINITY_DN101511_c0_g1|g.2846 ORF TRINITY_DN101511_c0_g1|g.2846 TRINITY_DN101511_c0_g1_m.2846 type:complete len:581 (+) TRINITY_DN101511_c0_g1:263-2005(+)	1	0.00474944	67.507	TK(1)TVEVNK	2	0.91472	1
TRINITY_DN101541_c4_g1_m.2910	272	K	TRINITY_DN101541_c4_g1|g.2910 ORF TRINITY_DN101541_c4_g1|g.2910 TRINITY_DN101541_c4_g1_m.2910 type:complete len:514 (+) TRINITY_DN101541_c4_g1:152-1693(+)	1	0.00605752	61.494	SYK(1)PNPR	2	1.6559	1
TRINITY_DN101541_c4_g1_m.2910	413	K	TRINITY_DN101541_c4_g1|g.2910 ORF TRINITY_DN101541_c4_g1|g.2910 TRINITY_DN101541_c4_g1_m.2910 type:complete len:514 (+) TRINITY_DN101541_c4_g1:152-1693(+)	1	1.06608e-09	150.53	AALSDDYFVK(1)R	2	0.86355	1
TRINITY_DN101541_c4_g1_m.2910	369	K	TRINITY_DN101541_c4_g1|g.2910 ORF TRINITY_DN101541_c4_g1|g.2910 TRINITY_DN101541_c4_g1_m.2910 type:complete len:514 (+) TRINITY_DN101541_c4_g1:152-1693(+)	1	0.0097329	74.486	VYK(1)NYDPR	2	-0.46196	1
TRINITY_DN101541_c4_g1_m.2910	216	K	TRINITY_DN101541_c4_g1|g.2910 ORF TRINITY_DN101541_c4_g1|g.2910 TRINITY_DN101541_c4_g1_m.2910 type:complete len:514 (+) TRINITY_DN101541_c4_g1:152-1693(+)	1	0.000826909	94.66	GQDLYTSK(1)TVR	2	-0.88333	1
TRINITY_DN101579_c2_g1_m.2976	145	K	TRINITY_DN101579_c2_g1|g.2976 ORF TRINITY_DN101579_c2_g1|g.2976 TRINITY_DN101579_c2_g1_m.2976 type:5prime_partial len:308 (+) TRINITY_DN101579_c2_g1:1-924(+)	1	4.75299e-06	78.925	IGSGTNIQDNSLVHVAK(1)SNISGK	3	-0.90158	1
TRINITY_DN101579_c2_g1_m.2976	264	K	TRINITY_DN101579_c2_g1|g.2976 ORF TRINITY_DN101579_c2_g1|g.2976 TRINITY_DN101579_c2_g1_m.2976 type:5prime_partial len:308 (+) TRINITY_DN101579_c2_g1:1-924(+)	1	1.4243e-06	86.135	VHATENAKPFDEIEFEK(1)LMR	4	-1.0188	2
TRINITY_DN101579_c2_g1_m.2976	255	K	TRINITY_DN101579_c2_g1|g.2976 ORF TRINITY_DN101579_c2_g1|g.2976 TRINITY_DN101579_c2_g1_m.2976 type:5prime_partial len:308 (+) TRINITY_DN101579_c2_g1:1-924(+)	1	2.62807e-06	71.912	VHATENAK(1)PFDEIEFEK	2	-3.0269	2
TRINITY_DN101579_c2_g1_m.2976	86	K	TRINITY_DN101579_c2_g1|g.2976 ORF TRINITY_DN101579_c2_g1|g.2976 TRINITY_DN101579_c2_g1_m.2976 type:5prime_partial len:308 (+) TRINITY_DN101579_c2_g1:1-924(+)	1	0.0048183	47.915	TLMNIFDK(1)APSVHK	2	-0.1925	2
TRINITY_DN101600_c1_g1_m.3027	444	K	TRINITY_DN101600_c1_g1|g.3027 ORF TRINITY_DN101600_c1_g1|g.3027 TRINITY_DN101600_c1_g1_m.3027 type:complete len:616 (+) TRINITY_DN101600_c1_g1:163-2010(+)	1	0.00012105	84.102	MANLDIPK(1)DLSSEAANK	2	0.3531	1
TRINITY_DN101626_c2_g6_m.3096	234	K	TRINITY_DN101626_c2_g6|g.3096 ORF TRINITY_DN101626_c2_g6|g.3096 TRINITY_DN101626_c2_g6_m.3096 type:complete len:542 (+) TRINITY_DN101626_c2_g6:471-2096(+)	1	4.81987e-16	139.7	EHVQLAK(1)TLGVSK	2	-2.992	1
TRINITY_DN101629_c1_g2_m.3102	549	K	TRINITY_DN101629_c1_g2|g.3102 ORF TRINITY_DN101629_c1_g2|g.3102 TRINITY_DN101629_c1_g2_m.3102 type:complete len:698 (+) TRINITY_DN101629_c1_g2:82-2175(+)	1	4.2913e-08	82.437	NIFK(1)LAQGEYIAPEK	2	-0.67201	1
TRINITY_DN101629_c1_g2_m.3102	372	K	TRINITY_DN101629_c1_g2|g.3102 ORF TRINITY_DN101629_c1_g2|g.3102 TRINITY_DN101629_c1_g2_m.3102 type:complete len:698 (+) TRINITY_DN101629_c1_g2:82-2175(+)	1	0.0654158	43.734	TSGGLK(1)ER	2	-0.84325	1
TRINITY_DN101639_c0_g1_m.3117	784	K	TRINITY_DN101639_c0_g1|g.3117 ORF TRINITY_DN101639_c0_g1|g.3117 TRINITY_DN101639_c0_g1_m.3117 type:5prime_partial len:833 (+) TRINITY_DN101639_c0_g1:2-2500(+)	1	0.00910411	48.785	DLK(1)GNPTEFFR	2	1.0528	1
TRINITY_DN101641_c0_g1_m.3119	84	K	TRINITY_DN101641_c0_g1|g.3119 ORF TRINITY_DN101641_c0_g1|g.3119 TRINITY_DN101641_c0_g1_m.3119 type:5prime_partial len:232 (+) TRINITY_DN101641_c0_g1:1-696(+)	1	1.44071e-22	116.28	PQGGEVVAVGEGK(1)TIGK	2	-2.7041	2
TRINITY_DN101641_c0_g1_m.3119	155	K	TRINITY_DN101641_c0_g1|g.3119 ORF TRINITY_DN101641_c0_g1|g.3119 TRINITY_DN101641_c0_g1_m.3119 type:5prime_partial len:232 (+) TRINITY_DN101641_c0_g1:1-696(+)	1	7.29082e-50	217.77	VSLAEEK(1)TSGGLLLTEAAK	2	-0.31279	1
TRINITY_DN101641_c0_g1_m.3119	204	K	TRINITY_DN101641_c0_g1|g.3119 ORF TRINITY_DN101641_c0_g1|g.3119 TRINITY_DN101641_c0_g1_m.3119 type:5prime_partial len:232 (+) TRINITY_DN101641_c0_g1:1-696(+)	1	9.93474e-11	111.6	KPLTISAGSTVLYSK(1)YAGSEFR	3	-2.1886	1
TRINITY_DN101641_c0_g1_m.3119	71	K	TRINITY_DN101641_c0_g1|g.3119 ORF TRINITY_DN101641_c0_g1|g.3119 TRINITY_DN101641_c0_g1_m.3119 type:5prime_partial len:232 (+) TRINITY_DN101641_c0_g1:1-696(+)	1	4.05274e-09	119.97	STGGILLPTAAQTK(1)PQGGEVVAVGEGK	3	0.98265	1
TRINITY_DN101641_c0_g1_m.3119	57	K	TRINITY_DN101641_c0_g1|g.3119 ORF TRINITY_DN101641_c0_g1|g.3119 TRINITY_DN101641_c0_g1_m.3119 type:5prime_partial len:232 (+) TRINITY_DN101641_c0_g1:1-696(+)	1	1.82142e-09	128.28	ISEEK(1)STGGILLPTAAQTK	2	-2.1686	1
TRINITY_DN101641_c0_g1_m.3119	41	K	TRINITY_DN101641_c0_g1|g.3119 ORF TRINITY_DN101641_c0_g1|g.3119 TRINITY_DN101641_c0_g1_m.3119 type:5prime_partial len:232 (+) TRINITY_DN101641_c0_g1:1-696(+)	1	0.000322198	83.358	YTSIK(1)PLGER	2	-1.8396	1
TRINITY_DN101641_c0_g1_m.3119	167	K	TRINITY_DN101641_c0_g1|g.3119 ORF TRINITY_DN101641_c0_g1|g.3119 TRINITY_DN101641_c0_g1_m.3119 type:5prime_partial len:232 (+) TRINITY_DN101641_c0_g1:1-696(+)	1	9.64631e-12	126.48	TSGGLLLTEAAK(1)ER	2	0.58067	1
TRINITY_DN101641_c0_g1_m.3119	52	K	TRINITY_DN101641_c0_g1|g.3119 ORF TRINITY_DN101641_c0_g1|g.3119 TRINITY_DN101641_c0_g1_m.3119 type:5prime_partial len:232 (+) TRINITY_DN101641_c0_g1:1-696(+)	1	0.00368456	98.009	IK(1)ISEEK	2	0.90098	1
TRINITY_DN101641_c0_g1_m.3119	148	K	TRINITY_DN101641_c0_g1|g.3119 ORF TRINITY_DN101641_c0_g1|g.3119 TRINITY_DN101641_c0_g1_m.3119 type:5prime_partial len:232 (+) TRINITY_DN101641_c0_g1:1-696(+)	1	0.00814867	81.335	VLIK(1)VSLAEEK	2	-0.60198	1
TRINITY_DN101641_c0_g1_m.3119	96	K	TRINITY_DN101641_c0_g1|g.3119 ORF TRINITY_DN101641_c0_g1|g.3119 TRINITY_DN101641_c0_g1_m.3119 type:5prime_partial len:232 (+) TRINITY_DN101641_c0_g1:1-696(+)	1	0.0132942	64.266	VDISVK(1)TGAK	2	0.36503	2
TRINITY_DN101641_c0_g1_m.3119	100	K	TRINITY_DN101641_c0_g1|g.3119 ORF TRINITY_DN101641_c0_g1|g.3119 TRINITY_DN101641_c0_g1_m.3119 type:5prime_partial len:232 (+) TRINITY_DN101641_c0_g1:1-696(+)	1	0.014971	59.645	TGAK(1)VVYSK	2	0.49352	1
TRINITY_DN101643_c4_g1_m.3120	177	K	TRINITY_DN101643_c4_g1|g.3120 ORF TRINITY_DN101643_c4_g1|g.3120 TRINITY_DN101643_c4_g1_m.3120 type:complete len:253 (+) TRINITY_DN101643_c4_g1:286-1044(+)	1	0.000325031	80.623	IDSTYSQGSPAK(1)IR	2	-4.2909	1
TRINITY_DN101648_c0_g1_m.3129	46	K	TRINITY_DN101648_c0_g1|g.3129 ORF TRINITY_DN101648_c0_g1|g.3129 TRINITY_DN101648_c0_g1_m.3129 type:complete len:152 (+) TRINITY_DN101648_c0_g1:80-535(+)	1	4.31702e-06	115.79	YKPETCSIQSHK(1)GDR	3	-1.2604	2
TRINITY_DN101648_c0_g1_m.3129	36	K	TRINITY_DN101648_c0_g1|g.3129 ORF TRINITY_DN101648_c0_g1|g.3129 TRINITY_DN101648_c0_g1_m.3129 type:complete len:152 (+) TRINITY_DN101648_c0_g1:80-535(+)	1	0.000118839	88.24	YK(1)PETCSIQSHK	3	1.4945	2
TRINITY_DN101648_c0_g1_m.3129	80	K	TRINITY_DN101648_c0_g1|g.3129 ORF TRINITY_DN101648_c0_g1|g.3129 TRINITY_DN101648_c0_g1_m.3129 type:complete len:152 (+) TRINITY_DN101648_c0_g1:80-535(+)	1	1.41192e-13	159.44	GDPIEFELGK(1)GQVIK	2	1.2992	1
TRINITY_DN101672_c0_g2_m.3170	74	K	TRINITY_DN101672_c0_g2|g.3170 ORF TRINITY_DN101672_c0_g2|g.3170 TRINITY_DN101672_c0_g2_m.3170 type:complete len:297 (+) TRINITY_DN101672_c0_g2:102-992(+)	1	0.0126322	45.489	QAK(1)EMAAAR	2	1.351	1
TRINITY_DN101684_c1_g2_m.3184	808	K	TRINITY_DN101684_c1_g2|g.3184 ORF TRINITY_DN101684_c1_g2|g.3184 TRINITY_DN101684_c1_g2_m.3184 type:3prime_partial len:867 (+) TRINITY_DN101684_c1_g2:175-2772(+)	1	0.000469743	137.88	MLEEHK(1)AR	2	0.94632	1
TRINITY_DN101725_c1_g1_m.3268	356	K	TRINITY_DN101725_c1_g1|g.3268 ORF TRINITY_DN101725_c1_g1|g.3268 TRINITY_DN101725_c1_g1_m.3268 type:5prime_partial len:585 (+) TRINITY_DN101725_c1_g1:3-1757(+)	1	7.93362e-05	90.142	SADGLLSLK(1)TSK	2	2.7411	1
TRINITY_DN101725_c1_g1_m.3268	215	K	TRINITY_DN101725_c1_g1|g.3268 ORF TRINITY_DN101725_c1_g1|g.3268 TRINITY_DN101725_c1_g1_m.3268 type:5prime_partial len:585 (+) TRINITY_DN101725_c1_g1:3-1757(+)	1	0.00529702	78.864	NILK(1)NAGVTLIEGR	2	2.0755	1
TRINITY_DN101725_c1_g1_m.3268	379	K	TRINITY_DN101725_c1_g1|g.3268 ORF TRINITY_DN101725_c1_g1|g.3268 TRINITY_DN101725_c1_g1_m.3268 type:5prime_partial len:585 (+) TRINITY_DN101725_c1_g1:3-1757(+)	0.945614	5.4629e-07	78.888	K(0.054)PNTK(0.946)NLGLEEAGVK	2	-3.1303	1
TRINITY_DN101725_c1_g1_m.3268	389	K	TRINITY_DN101725_c1_g1|g.3268 ORF TRINITY_DN101725_c1_g1|g.3268 TRINITY_DN101725_c1_g1_m.3268 type:5prime_partial len:585 (+) TRINITY_DN101725_c1_g1:3-1757(+)	1	0.00108236	65.408	NLGLEEAGVK(1)LDK	2	1.8374	1
TRINITY_DN101725_c1_g1_m.3268	199	K	TRINITY_DN101725_c1_g1|g.3268 ORF TRINITY_DN101725_c1_g1|g.3268 TRINITY_DN101725_c1_g1_m.3268 type:5prime_partial len:585 (+) TRINITY_DN101725_c1_g1:3-1757(+)	1	4.23609e-06	112.73	HDWSTLMANK(1)TAELHR	3	-2.3424	1
TRINITY_DN101725_c1_g1_m.3268	347	K	TRINITY_DN101725_c1_g1|g.3268 ORF TRINITY_DN101725_c1_g1|g.3268 TRINITY_DN101725_c1_g1_m.3268 type:5prime_partial len:585 (+) TRINITY_DN101725_c1_g1:3-1757(+)	1	0.0047682	51.128	GIEFHTEESPLAILK(1)SADGLLSLK	3	1.5715	1
TRINITY_DN101730_c0_g15_m.3274	66	K	TRINITY_DN101730_c0_g15|g.3274 ORF TRINITY_DN101730_c0_g15|g.3274 TRINITY_DN101730_c0_g15_m.3274 type:complete len:173 (+) TRINITY_DN101730_c0_g15:88-606(+)	1	0.00234849	42.888	VDQLRPGTSGHTLTVK(1)VVDSK	3	0.072611	1
TRINITY_DN101773_c0_g1_m.3352	426	K	TRINITY_DN101773_c0_g1|g.3352 ORF TRINITY_DN101773_c0_g1|g.3352 TRINITY_DN101773_c0_g1_m.3352 type:complete len:543 (+) TRINITY_DN101773_c0_g1:38-1666(+)	1	1.17265e-55	273.07	IDPNQNTGTSIQK(1)CR	2	-3.1394	1
TRINITY_DN101773_c0_g1_m.3352	514	K	TRINITY_DN101773_c0_g1|g.3352 ORF TRINITY_DN101773_c0_g1|g.3352 TRINITY_DN101773_c0_g1_m.3352 type:complete len:543 (+) TRINITY_DN101773_c0_g1:38-1666(+)	1	2.03205e-07	96.453	VNWTGYHVITDAK(1)VANDYTVAK	3	0.14914	1
TRINITY_DN101773_c0_g1_m.3352	405	K	TRINITY_DN101773_c0_g1|g.3352 ORF TRINITY_DN101773_c0_g1|g.3352 TRINITY_DN101773_c0_g1_m.3352 type:complete len:543 (+) TRINITY_DN101773_c0_g1:38-1666(+)	0.999983	0.000320767	63.766	KPMAGQK(1)NAVTAQGR	2	-1.9753	1
TRINITY_DN101773_c0_g1_m.3352	257	K	TRINITY_DN101773_c0_g1|g.3352 ORF TRINITY_DN101773_c0_g1|g.3352 TRINITY_DN101773_c0_g1_m.3352 type:complete len:543 (+) TRINITY_DN101773_c0_g1:38-1666(+)	1	5.19653e-06	117.21	TVQAAVNAAPDNGK(1)AR	2	-3.0172	1
TRINITY_DN101773_c0_g1_m.3352	270	K	TRINITY_DN101773_c0_g1|g.3352 ORF TRINITY_DN101773_c0_g1|g.3352 TRINITY_DN101773_c0_g1_m.3352 type:complete len:543 (+) TRINITY_DN101773_c0_g1:38-1666(+)	1	0.000173718	87.895	GTYK(1)ENVIVGK	2	-1.8157	2
TRINITY_DN101773_c0_g1_m.3352	451	K	TRINITY_DN101773_c0_g1|g.3352 ORF TRINITY_DN101773_c0_g1|g.3352 TRINITY_DN101773_c0_g1_m.3352 type:complete len:543 (+) TRINITY_DN101773_c0_g1:38-1666(+)	1	0.00242491	104.76	PWK(1)EYSR	2	0.95345	1
TRINITY_DN101773_c0_g1_m.3352	277	K	TRINITY_DN101773_c0_g1|g.3352 ORF TRINITY_DN101773_c0_g1|g.3352 TRINITY_DN101773_c0_g1_m.3352 type:complete len:543 (+) TRINITY_DN101773_c0_g1:38-1666(+)	1	0.0108314	87.251	ENVIVGK(1)K	2	-1.1607	1
TRINITY_DN101786_c0_g2_m.3371	434	K	TRINITY_DN101786_c0_g2|g.3371 ORF TRINITY_DN101786_c0_g2|g.3371 TRINITY_DN101786_c0_g2_m.3371 type:complete len:478 (+) TRINITY_DN101786_c0_g2:136-1569(+)	1	0.0588631	43.272	LK(1)DLGVLLGK	2	1.5517	1
TRINITY_DN101786_c0_g2_m.3371	432	K	TRINITY_DN101786_c0_g2|g.3371 ORF TRINITY_DN101786_c0_g2|g.3371 TRINITY_DN101786_c0_g2_m.3371 type:complete len:478 (+) TRINITY_DN101786_c0_g2:136-1569(+)	1	0.0017284	51.872	AETLILFEK(1)LK	2	0.5318	1
TRINITY_DN101786_c0_g2_m.3371	394	K	TRINITY_DN101786_c0_g2|g.3371 ORF TRINITY_DN101786_c0_g2|g.3371 TRINITY_DN101786_c0_g2_m.3371 type:complete len:478 (+) TRINITY_DN101786_c0_g2:136-1569(+)	1	1.14389e-05	84.102	EIQHK(1)HEIIGDVR	2	-2.054	2
TRINITY_DN101790_c1_g1_m.3376	566	K	TRINITY_DN101790_c1_g1|g.3376 ORF TRINITY_DN101790_c1_g1|g.3376 TRINITY_DN101790_c1_g1_m.3376 type:complete len:673 (+) TRINITY_DN101790_c1_g1:160-2178(+)	1	0.018512	49.325	EK(1)AEAAAR	2	-0.31824	1
TRINITY_DN101790_c1_g1_m.3376	585	K	TRINITY_DN101790_c1_g1|g.3376 ORF TRINITY_DN101790_c1_g1|g.3376 TRINITY_DN101790_c1_g1_m.3376 type:complete len:673 (+) TRINITY_DN101790_c1_g1:160-2178(+)	1	0.00606496	68.49	AEALAK(1)EEEER	2	-1.7971	1
TRINITY_DN101818_c1_g1_m.3435	218	K	TRINITY_DN101818_c1_g1|g.3435 ORF TRINITY_DN101818_c1_g1|g.3435 TRINITY_DN101818_c1_g1_m.3435 type:complete len:542 (+) TRINITY_DN101818_c1_g1:130-1755(+)	1	0.0670945	40.502	YIK(1)ILGEALK	2	0.16525	1
TRINITY_DN101859_c1_g2_m.3497	114	K	TRINITY_DN101859_c1_g2|g.3497 ORF TRINITY_DN101859_c1_g2|g.3497 TRINITY_DN101859_c1_g2_m.3497 type:5prime_partial len:349 (+) TRINITY_DN101859_c1_g2:3-1049(+)	0.88625	0.00949689	74.849	K(0.114)PK(0.886)ITEVDR	2	0.076798	1
TRINITY_DN101874_c4_g1_m.3521	409	K	TRINITY_DN101874_c4_g1|g.3521 ORF TRINITY_DN101874_c4_g1|g.3521 TRINITY_DN101874_c4_g1_m.3521 type:complete len:432 (+) TRINITY_DN101874_c4_g1:243-1538(+)	1	0.00210255	85.622	IVANHEAYQK(1)R	2	-1.7699	1
TRINITY_DN101893_c3_g2_m.3561	119	K	TRINITY_DN101893_c3_g2|g.3561 ORF TRINITY_DN101893_c3_g2|g.3561 TRINITY_DN101893_c3_g2_m.3561 type:complete len:291 (+) TRINITY_DN101893_c3_g2:190-1062(+)	0.92496	0.00394397	43.518	K(0.075)PADFAK(0.925)YQAFELIHAR	3	-1.4721	1
TRINITY_DN101894_c0_g1_m.3564	347	K	TRINITY_DN101894_c0_g1|g.3564 ORF TRINITY_DN101894_c0_g1|g.3564 TRINITY_DN101894_c0_g1_m.3564 type:complete len:464 (+) TRINITY_DN101894_c0_g1:295-1686(+)	1	0.000381916	88.42	TDRPFK(1)TSIVFAHDR	3	-0.72887	1
TRINITY_DN101913_c0_g1_m.3598	394	K	TRINITY_DN101913_c0_g1|g.3598 ORF TRINITY_DN101913_c0_g1|g.3598 TRINITY_DN101913_c0_g1_m.3598 type:complete len:503 (+) TRINITY_DN101913_c0_g1:414-1922(+)	1	5.62106e-10	116.06	VLYHALSK(1)EEQLEALEEEKK	3	-5.6762	1
TRINITY_DN101941_c0_g2_m.3641	221	K	TRINITY_DN101941_c0_g2|g.3641 ORF TRINITY_DN101941_c0_g2|g.3641 TRINITY_DN101941_c0_g2_m.3641 type:complete len:309 (+) TRINITY_DN101941_c0_g2:175-1101(+)	1	0.0114087	81.163	ELAPHK(1)PLAK	2	-2.5747	1
TRINITY_DN101977_c4_g2_m.3707	162	K	TRINITY_DN101977_c4_g2|g.3707 ORF TRINITY_DN101977_c4_g2|g.3707 TRINITY_DN101977_c4_g2_m.3707 type:complete len:270 (+) TRINITY_DN101977_c4_g2:218-1027(+)	1	6.62073e-06	91.245	FASSAVYIVTTK(1)QSR	2	-2.0469	2
TRINITY_DN101977_c4_g2_m.3707	267	K	TRINITY_DN101977_c4_g2|g.3707 ORF TRINITY_DN101977_c4_g2|g.3707 TRINITY_DN101977_c4_g2_m.3707 type:complete len:270 (+) TRINITY_DN101977_c4_g2:218-1027(+)	1	0.0144795	51.569	IQLLDLSDFSSK(1)LK	2	4.4833	1
TRINITY_DN101986_c0_g1_m.3723	119	K	TRINITY_DN101986_c0_g1|g.3723 ORF TRINITY_DN101986_c0_g1|g.3723 TRINITY_DN101986_c0_g1_m.3723 type:complete len:268 (+) TRINITY_DN101986_c0_g1:81-884(+)	1	0.000335447	115.86	VPVAK(1)LDDK	2	0.40346	1
TRINITY_DN101986_c0_g1_m.3723	88	K	TRINITY_DN101986_c0_g1|g.3723 ORF TRINITY_DN101986_c0_g1|g.3723 TRINITY_DN101986_c0_g1_m.3723 type:complete len:268 (+) TRINITY_DN101986_c0_g1:81-884(+)	1	2.16175e-08	104.04	VLLTLEEK(1)NLPYDIK	2	3.108	1
TRINITY_DN101986_c0_g1_m.3723	108	K	TRINITY_DN101986_c0_g1|g.3723 ORF TRINITY_DN101986_c0_g1|g.3723 TRINITY_DN101986_c0_g1_m.3723 type:complete len:268 (+) TRINITY_DN101986_c0_g1:81-884(+)	0.999956	7.72464e-07	81.409	LANLANKPEWFLK(1)ISPEGK	3	-1.5235	1
TRINITY_DN101986_c0_g1_m.3723	249	K	TRINITY_DN101986_c0_g1|g.3723 ORF TRINITY_DN101986_c0_g1|g.3723 TRINITY_DN101986_c0_g1_m.3723 type:complete len:268 (+) TRINITY_DN101986_c0_g1:81-884(+)	1	9.3589e-13	187.82	ESFVK(1)TQALR	2	-1.1686	1
TRINITY_DN101992_c1_g2_m.3733	135	K	TRINITY_DN101992_c1_g2|g.3733 ORF TRINITY_DN101992_c1_g2|g.3733 TRINITY_DN101992_c1_g2_m.3733 type:complete len:857 (+) TRINITY_DN101992_c1_g2:401-2971(+)	1	0.00285506	74.269	LK(1)EQLQER	2	0.13082	1
TRINITY_DN101995_c0_g1_m.3740	24	K	TRINITY_DN101995_c0_g1|g.3740 ORF TRINITY_DN101995_c0_g1|g.3740 TRINITY_DN101995_c0_g1_m.3740 type:complete len:456 (+) TRINITY_DN101995_c0_g1:461-1828(+)	1	0.0183069	48.785	DNK(1)DLVAANIR	2	-1.0683	1
TRINITY_DN102004_c0_g1_m.3758	204	K	TRINITY_DN102004_c0_g1|g.3758 ORF TRINITY_DN102004_c0_g1|g.3758 TRINITY_DN102004_c0_g1_m.3758 type:complete len:550 (+) TRINITY_DN102004_c0_g1:40-1689(+)	1	0.0466728	43.306	NSDELIDFK(1)EGR	2	3.9739	1
TRINITY_DN102004_c0_g1_m.3758	424	K	TRINITY_DN102004_c0_g1|g.3758 ORF TRINITY_DN102004_c0_g1|g.3758 TRINITY_DN102004_c0_g1_m.3758 type:complete len:550 (+) TRINITY_DN102004_c0_g1:40-1689(+)	1	0.00173624	47.561	VQEQNK(1)TALR	2	0.63266	1
TRINITY_DN102012_c1_g1_m.3775	172	K	TRINITY_DN102012_c1_g1|g.3775 ORF TRINITY_DN102012_c1_g1|g.3775 TRINITY_DN102012_c1_g1_m.3775 type:complete len:444 (+) TRINITY_DN102012_c1_g1:235-1566(+)	1	5.73583e-07	131.54	VVQK(1)QFHDVGGK	2	-1.6296	2
TRINITY_DN102012_c1_g1_m.3775	180	K	TRINITY_DN102012_c1_g1|g.3775 ORF TRINITY_DN102012_c1_g1|g.3775 TRINITY_DN102012_c1_g1_m.3775 type:complete len:444 (+) TRINITY_DN102012_c1_g1:235-1566(+)	1	4.23979e-11	131.54	QFHDVGGK(1)AVEVK	2	-1.1276	2
TRINITY_DN102018_c0_g1_m.3783	682	K	TRINITY_DN102018_c0_g1|g.3783 ORF TRINITY_DN102018_c0_g1|g.3783 TRINITY_DN102018_c0_g1_m.3783 type:complete len:778 (+) TRINITY_DN102018_c0_g1:81-2414(+)	1	0.000882693	60.329	TLANPGDLNYPSFSVIFSSLHDVVTYK(1)R	3	4.2366	1
TRINITY_DN102018_c0_g1_m.3783	205	K	TRINITY_DN102018_c0_g1|g.3783 ORF TRINITY_DN102018_c0_g1|g.3783 TRINITY_DN102018_c0_g1_m.3783 type:complete len:778 (+) TRINITY_DN102018_c0_g1:81-2414(+)	1	1.22514e-34	191.95	HPIDETLESK(1)SPLDTK	2	-3.0829	3
TRINITY_DN102018_c0_g1_m.3783	758	K	TRINITY_DN102018_c0_g1|g.3783 ORF TRINITY_DN102018_c0_g1|g.3783 TRINITY_DN102018_c0_g1_m.3783 type:complete len:778 (+) TRINITY_DN102018_c0_g1:81-2414(+)	1	1.01809e-12	166.71	QFGWISWSDGVHK(1)VR	2	-1.0295	2
TRINITY_DN102018_c0_g1_m.3783	188	K	TRINITY_DN102018_c0_g1|g.3783 ORF TRINITY_DN102018_c0_g1|g.3783 TRINITY_DN102018_c0_g1_m.3783 type:complete len:778 (+) TRINITY_DN102018_c0_g1:81-2414(+)	1	3.60122e-07	158.57	FYYK(1)GYEAYLR	2	-1.0778	1
TRINITY_DN102018_c0_g1_m.3783	714	K	TRINITY_DN102018_c0_g1|g.3783 ORF TRINITY_DN102018_c0_g1|g.3783 TRINITY_DN102018_c0_g1_m.3783 type:complete len:778 (+) TRINITY_DN102018_c0_g1:81-2414(+)	1	0.000336111	69.224	VYNVEISSPPEVDVK(1)VTPSK	2	0.71659	1
TRINITY_DN102018_c0_g1_m.3783	505	K	TRINITY_DN102018_c0_g1|g.3783 ORF TRINITY_DN102018_c0_g1|g.3783 TRINITY_DN102018_c0_g1_m.3783 type:complete len:778 (+) TRINITY_DN102018_c0_g1:81-2414(+)	1	0.00138214	40.324	TPEILK(1)PDVIAPGVNILAAWTR	3	3.4817	1
TRINITY_DN102018_c0_g1_m.3783	184	K	TRINITY_DN102018_c0_g1|g.3783 ORF TRINITY_DN102018_c0_g1|g.3783 TRINITY_DN102018_c0_g1_m.3783 type:complete len:778 (+) TRINITY_DN102018_c0_g1:81-2414(+)	1	0.0207531	45.489	LVGAK(1)FYYK	2	-1.3624	1
TRINITY_DN102018_c0_g1_m.3783	211	K	TRINITY_DN102018_c0_g1|g.3783 ORF TRINITY_DN102018_c0_g1|g.3783 TRINITY_DN102018_c0_g1_m.3783 type:complete len:778 (+) TRINITY_DN102018_c0_g1:81-2414(+)	1	7.07396e-14	77.932	SPLDTK(1)GHGTHTASTAAGAVVSGASFLGYAEGEAR	4	0.89908	2
TRINITY_DN102019_c0_g1_m.3788	31	K	TRINITY_DN102019_c0_g1|g.3788 ORF TRINITY_DN102019_c0_g1|g.3788 TRINITY_DN102019_c0_g1_m.3788 type:complete len:219 (+) TRINITY_DN102019_c0_g1:600-1256(+)	1	0.00469691	88.24	NFSK(1)GLQEDER	2	1.1723	1
TRINITY_DN102024_c1_g1_m.3805	16	K	TRINITY_DN102024_c1_g1|g.3805 ORF TRINITY_DN102024_c1_g1|g.3805 TRINITY_DN102024_c1_g1_m.3805 type:complete len:516 (+) TRINITY_DN102024_c1_g1:186-1733(+)	1	0.00263533	106	QK(1)EDFKPIEEGK	2	-2.0887	1
TRINITY_DN102035_c0_g1_m.3833	209	K	TRINITY_DN102035_c0_g1|g.3833 ORF TRINITY_DN102035_c0_g1|g.3833 TRINITY_DN102035_c0_g1_m.3833 type:complete len:831 (+) TRINITY_DN102035_c0_g1:88-2580(+)	1	0.000577128	73.655	NPK(1)MLELASWLK	2	-0.85654	1
TRINITY_DN102039_c0_g3_m.3840	185	K	TRINITY_DN102039_c0_g3|g.3840 ORF TRINITY_DN102039_c0_g3|g.3840 TRINITY_DN102039_c0_g3_m.3840 type:3prime_partial len:229 (+) TRINITY_DN102039_c0_g3:173-856(+)	1	0.00030968	91.032	VK(1)YVGLSEASADTIR	2	-2.0466	1
TRINITY_DN102039_c0_g3_m.3840	105	K	TRINITY_DN102039_c0_g3|g.3840 ORF TRINITY_DN102039_c0_g3|g.3840 TRINITY_DN102039_c0_g3_m.3840 type:3prime_partial len:229 (+) TRINITY_DN102039_c0_g3:173-856(+)	1	0.0298966	61.494	ALK(1)QLPR	2	-0.39043	2
TRINITY_DN102041_c0_g2_m.3846	67	K	TRINITY_DN102041_c0_g2|g.3846 ORF TRINITY_DN102041_c0_g2|g.3846 TRINITY_DN102041_c0_g2_m.3846 type:5prime_partial len:584 (+) TRINITY_DN102041_c0_g2:1-1752(+)	1	7.74431e-22	123.14	SSFK(1)IVDGPPSSAAGSPEEIAK	2	-3.1758	1
TRINITY_DN102041_c0_g2_m.3846	63	K	TRINITY_DN102041_c0_g2|g.3846 ORF TRINITY_DN102041_c0_g2|g.3846 TRINITY_DN102041_c0_g2_m.3846 type:5prime_partial len:584 (+) TRINITY_DN102041_c0_g2:1-1752(+)	1	0.000109637	81.48	LNHPLPLPAVLK(1)SSFK	2	1.7143	2
TRINITY_DN102041_c0_g2_m.3846	142	K	TRINITY_DN102041_c0_g2|g.3846 ORF TRINITY_DN102041_c0_g2|g.3846 TRINITY_DN102041_c0_g2_m.3846 type:5prime_partial len:584 (+) TRINITY_DN102041_c0_g2:1-1752(+)	1	0.00158074	83.623	AK(1)GSTLYGFR	2	-0.83158	1
TRINITY_DN102041_c0_g2_m.3846	282	K	TRINITY_DN102041_c0_g2|g.3846 ORF TRINITY_DN102041_c0_g2|g.3846 TRINITY_DN102041_c0_g2_m.3846 type:5prime_partial len:584 (+) TRINITY_DN102041_c0_g2:1-1752(+)	1	0.000427271	98.009	STGK(1)YYHFVR	2	-1.3751	1
TRINITY_DN102041_c0_g2_m.3846	424	K	TRINITY_DN102041_c0_g2|g.3846 ORF TRINITY_DN102041_c0_g2|g.3846 TRINITY_DN102041_c0_g2_m.3846 type:5prime_partial len:584 (+) TRINITY_DN102041_c0_g2:1-1752(+)	1	4.82026e-09	108.34	IETEK(1)MLISMVETELEK	2	3.7029	2
TRINITY_DN102041_c0_g2_m.3846	249	K	TRINITY_DN102041_c0_g2|g.3846 ORF TRINITY_DN102041_c0_g2|g.3846 TRINITY_DN102041_c0_g2_m.3846 type:5prime_partial len:584 (+) TRINITY_DN102041_c0_g2:1-1752(+)	1	0.0503559	49.96	TIDGDLK(1)CK	2	-0.71824	1
TRINITY_DN102041_c0_g2_m.3846	419	K	TRINITY_DN102041_c0_g2|g.3846 ORF TRINITY_DN102041_c0_g2|g.3846 TRINITY_DN102041_c0_g2_m.3846 type:5prime_partial len:584 (+) TRINITY_DN102041_c0_g2:1-1752(+)	1	7.55899e-13	172.09	DPHGNVQVAK(1)IETEK	2	-3.5043	2
TRINITY_DN102041_c0_g2_m.3846	187	K	TRINITY_DN102041_c0_g2|g.3846 ORF TRINITY_DN102041_c0_g2|g.3846 TRINITY_DN102041_c0_g2_m.3846 type:5prime_partial len:584 (+) TRINITY_DN102041_c0_g2:1-1752(+)	1	0.0133575	72.042	DK(1)IETPEQFK	2	2.919	1
TRINITY_DN102041_c0_g2_m.3846	195	K	TRINITY_DN102041_c0_g2|g.3846 ORF TRINITY_DN102041_c0_g2|g.3846 TRINITY_DN102041_c0_g2_m.3846 type:5prime_partial len:584 (+) TRINITY_DN102041_c0_g2:1-1752(+)	1	2.14145e-37	224.97	DKIETPEQFK(1)QAEETVLK	3	-2.2477	2
TRINITY_DN102080_c1_g1_m.3928	124	K	TRINITY_DN102080_c1_g1|g.3928 ORF TRINITY_DN102080_c1_g1|g.3928 TRINITY_DN102080_c1_g1_m.3928 type:5prime_partial len:295 (+) TRINITY_DN102080_c1_g1:3-887(+)	1	4.18638e-05	81.799	SAHLK(1)ALEVAK	2	0.2599	2
TRINITY_DN102080_c1_g1_m.3928	197	K	TRINITY_DN102080_c1_g1|g.3928 ORF TRINITY_DN102080_c1_g1|g.3928 TRINITY_DN102080_c1_g1_m.3928 type:5prime_partial len:295 (+) TRINITY_DN102080_c1_g1:3-887(+)	1	6.21943e-08	102.03	PSLK(1)LLLVTLGEK	2	0.15787	2
TRINITY_DN102080_c1_g1_m.3928	274	K	TRINITY_DN102080_c1_g1|g.3928 ORF TRINITY_DN102080_c1_g1|g.3928 TRINITY_DN102080_c1_g1_m.3928 type:5prime_partial len:295 (+) TRINITY_DN102080_c1_g1:3-887(+)	1	6.25401e-23	163.59	FANACGAITTTK(1)K	2	-1.667	1
TRINITY_DN102080_c1_g1_m.3928	104	K	TRINITY_DN102080_c1_g1|g.3928 ORF TRINITY_DN102080_c1_g1|g.3928 TRINITY_DN102080_c1_g1_m.3928 type:5prime_partial len:295 (+) TRINITY_DN102080_c1_g1:3-887(+)	1	8.3413e-07	104.49	AK(1)VFHYGSISLITEPCR	2	-2.0429	3
TRINITY_DN102080_c1_g1_m.3928	213	K	TRINITY_DN102080_c1_g1|g.3928 ORF TRINITY_DN102080_c1_g1|g.3928 TRINITY_DN102080_c1_g1_m.3928 type:5prime_partial len:295 (+) TRINITY_DN102080_c1_g1:3-887(+)	1	0.0116757	78.178	YYTK(1)DFR	2	-0.7526	1
TRINITY_DN102080_c1_g1_m.3928	209	K	TRINITY_DN102080_c1_g1|g.3928 ORF TRINITY_DN102080_c1_g1|g.3928 TRINITY_DN102080_c1_g1_m.3928 type:5prime_partial len:295 (+) TRINITY_DN102080_c1_g1:3-887(+)	1	0.0616222	41.025	GCK(1)YYTK	2	0.88601	1
TRINITY_DN102080_c1_g1_m.3928	31	K	TRINITY_DN102080_c1_g1|g.3928 ORF TRINITY_DN102080_c1_g1|g.3928 TRINITY_DN102080_c1_g1_m.3928 type:5prime_partial len:295 (+) TRINITY_DN102080_c1_g1:3-887(+)	1	0.000664971	87.573	AAFMGK(1)LGDDEFGR	2	1.0373	2
TRINITY_DN102080_c1_g1_m.3928	223	K	TRINITY_DN102080_c1_g1|g.3928 ORF TRINITY_DN102080_c1_g1|g.3928 TRINITY_DN102080_c1_g1_m.3928 type:5prime_partial len:295 (+) TRINITY_DN102080_c1_g1:3-887(+)	1	0.0502527	54.143	GAVDAFK(1)VSQIDTTGAGDAFVGALLTK	3	4.989	1
TRINITY_DN102126_c0_g1_m.4011	371	K	TRINITY_DN102126_c0_g1|g.4011 ORF TRINITY_DN102126_c0_g1|g.4011 TRINITY_DN102126_c0_g1_m.4011 type:complete len:409 (+) TRINITY_DN102126_c0_g1:172-1398(+)	0.996048	0.00220777	66.509	NIAMGYVK(0.996)SGSHK(0.004)PGTEVK	3	1.0942	1
TRINITY_DN102126_c0_g1_m.4011	137	K	TRINITY_DN102126_c0_g1|g.4011 ORF TRINITY_DN102126_c0_g1|g.4011 TRINITY_DN102126_c0_g1_m.4011 type:complete len:409 (+) TRINITY_DN102126_c0_g1:172-1398(+)	1	1.06541e-11	156.57	GGAIDDSVVTK(1)VR	2	2.4471	1
TRINITY_DN102126_c0_g1_m.4011	205	K	TRINITY_DN102126_c0_g1|g.4011 ORF TRINITY_DN102126_c0_g1|g.4011 TRINITY_DN102126_c0_g1_m.4011 type:complete len:409 (+) TRINITY_DN102126_c0_g1:172-1398(+)	1	1.80298e-05	99.276	DDLSK(1)MYFGEFK	2	3.295	1
TRINITY_DN102126_c0_g1_m.4011	315	K	TRINITY_DN102126_c0_g1|g.4011 ORF TRINITY_DN102126_c0_g1|g.4011 TRINITY_DN102126_c0_g1_m.4011 type:complete len:409 (+) TRINITY_DN102126_c0_g1:172-1398(+)	1	2.90824e-05	103.17	AEGGFLGADVILK(1)QLEEGPSIR	3	1.8479	1
TRINITY_DN102126_c0_g1_m.4011	362	K	TRINITY_DN102126_c0_g1|g.4011 ORF TRINITY_DN102126_c0_g1|g.4011 TRINITY_DN102126_c0_g1_m.4011 type:complete len:409 (+) TRINITY_DN102126_c0_g1:172-1398(+)	1	2.28216e-05	86.838	LGEITSGGFSPCLK(1)K	2	0.14852	1
TRINITY_DN102126_c0_g1_m.4011	154	K	TRINITY_DN102126_c0_g1|g.4011 ORF TRINITY_DN102126_c0_g1|g.4011 TRINITY_DN102126_c0_g1_m.4011 type:complete len:409 (+) TRINITY_DN102126_c0_g1:172-1398(+)	1	2.91826e-08	66.485	DK(1)DLAHIGEHLEAFK	2	-2.5609	2
TRINITY_DN102126_c0_g1_m.4011	376	K	TRINITY_DN102126_c0_g1|g.4011 ORF TRINITY_DN102126_c0_g1|g.4011 TRINITY_DN102126_c0_g1_m.4011 type:complete len:409 (+) TRINITY_DN102126_c0_g1:172-1398(+)	1	0.000148198	112.93	SGSHK(1)PGTEVK	2	0.029296	2
TRINITY_DN102126_c0_g1_m.4011	169	K	TRINITY_DN102126_c0_g1|g.4011 ORF TRINITY_DN102126_c0_g1|g.4011 TRINITY_DN102126_c0_g1_m.4011 type:complete len:409 (+) TRINITY_DN102126_c0_g1:172-1398(+)	1	1.18742e-05	95.138	AK(1)GGDVSWHIHDER	3	-0.26779	2
TRINITY_DN102133_c3_g1_m.4029	92	K	TRINITY_DN102133_c3_g1|g.4029 ORF TRINITY_DN102133_c3_g1|g.4029 TRINITY_DN102133_c3_g1_m.4029 type:5prime_partial len:100 (+) TRINITY_DN102133_c3_g1:1-300(+)	0.999539	0.0365546	45.939	AKPYK(1)DHPTILR	3	-1.0847	1
TRINITY_DN102135_c0_g1_m.4034	228	K	TRINITY_DN102135_c0_g1|g.4034 ORF TRINITY_DN102135_c0_g1|g.4034 TRINITY_DN102135_c0_g1_m.4034 type:5prime_partial len:1138 (+) TRINITY_DN102135_c0_g1:3-3416(+)	1	0.0167418	46.447	IAEFK(1)DPNR	2	1.5672	1
TRINITY_DN102135_c0_g1_m.4034	767	K	TRINITY_DN102135_c0_g1|g.4034 ORF TRINITY_DN102135_c0_g1|g.4034 TRINITY_DN102135_c0_g1_m.4034 type:5prime_partial len:1138 (+) TRINITY_DN102135_c0_g1:3-3416(+)	1	0.00997627	72.492	MSK(1)STGNFR	2	0.37926	1
TRINITY_DN102149_c0_g1_m.4056	63	K	TRINITY_DN102149_c0_g1|g.4056 ORF TRINITY_DN102149_c0_g1|g.4056 TRINITY_DN102149_c0_g1_m.4056 type:complete len:270 (+) TRINITY_DN102149_c0_g1:210-1019(+)	1	3.33043e-06	141.93	SELASQEK(1)NR	2	0.24292	1
TRINITY_DN102168_c1_g1_m.4094	107	K	TRINITY_DN102168_c1_g1|g.4094 ORF TRINITY_DN102168_c1_g1|g.4094 TRINITY_DN102168_c1_g1_m.4094 type:complete len:576 (+) TRINITY_DN102168_c1_g1:129-1856(+)	1	0.0101321	51.872	LK(1)GEEVLTK	2	1.4975	1
TRINITY_DN102224_c0_g1_m.4214	353	K	TRINITY_DN102224_c0_g1|g.4214 ORF TRINITY_DN102224_c0_g1|g.4214 TRINITY_DN102224_c0_g1_m.4214 type:complete len:723 (+) TRINITY_DN102224_c0_g1:294-2462(+)	1	0.00847193	67.464	IK(1)ANLQSR	2	0.49941	1
TRINITY_DN102224_c0_g1_m.4214	707	K	TRINITY_DN102224_c0_g1|g.4214 ORF TRINITY_DN102224_c0_g1|g.4214 TRINITY_DN102224_c0_g1_m.4214 type:complete len:723 (+) TRINITY_DN102224_c0_g1:294-2462(+)	1	0.00123638	73.655	AAK(1)GSPLSAAVER	2	-0.63378	1
TRINITY_DN102224_c0_g1_m.4214	45	K	TRINITY_DN102224_c0_g1|g.4214 ORF TRINITY_DN102224_c0_g1|g.4214 TRINITY_DN102224_c0_g1_m.4214 type:complete len:723 (+) TRINITY_DN102224_c0_g1:294-2462(+)	1	0.0102794	50.834	DNYEQALK(1)R	2	1.8649	1
TRINITY_DN102224_c0_g1_m.4214	378	K	TRINITY_DN102224_c0_g1|g.4214 ORF TRINITY_DN102224_c0_g1|g.4214 TRINITY_DN102224_c0_g1_m.4214 type:complete len:723 (+) TRINITY_DN102224_c0_g1:294-2462(+)	1	1.05405e-05	66.619	TLSLVK(1)GVLDYESFR	2	2.3545	1
TRINITY_DN102224_c0_g1_m.4214	168	K	TRINITY_DN102224_c0_g1|g.4214 ORF TRINITY_DN102224_c0_g1|g.4214 TRINITY_DN102224_c0_g1_m.4214 type:complete len:723 (+) TRINITY_DN102224_c0_g1:294-2462(+)	1	0.00166032	69.276	ALEMILLSK(1)SIK	2	0.66259	1
TRINITY_DN102231_c3_g4_m.4226	197	K	TRINITY_DN102231_c3_g4|g.4226 ORF TRINITY_DN102231_c3_g4|g.4226 TRINITY_DN102231_c3_g4_m.4226 type:complete len:439 (+) TRINITY_DN102231_c3_g4:36-1352(+)	1	0.00154108	69.641	IDNSGK(1)DMILTR	2	-1.0818	1
TRINITY_DN102231_c3_g4_m.4226	190	K	TRINITY_DN102231_c3_g4|g.4226 ORF TRINITY_DN102231_c3_g4|g.4226 TRINITY_DN102231_c3_g4_m.4226 type:complete len:439 (+) TRINITY_DN102231_c3_g4:36-1352(+)	1	0.00358535	102.46	IRPIISK(1)R	2	1.0498	1
TRINITY_DN102231_c3_g4_m.4226	206	K	TRINITY_DN102231_c3_g4|g.4226 ORF TRINITY_DN102231_c3_g4|g.4226 TRINITY_DN102231_c3_g4_m.4226 type:complete len:439 (+) TRINITY_DN102231_c3_g4:36-1352(+)	1	0.0678281	54.436	TFK(1)EFEAK	2	-2.4762	1
TRINITY_DN102240_c0_g1_m.4244	278	K	TRINITY_DN102240_c0_g1|g.4244 ORF TRINITY_DN102240_c0_g1|g.4244 TRINITY_DN102240_c0_g1_m.4244 type:complete len:524 (+) TRINITY_DN102240_c0_g1:191-1762(+)	1	3.18201e-07	144.47	DDASTK(1)EFNLR	2	0.97878	1
TRINITY_DN102240_c0_g1_m.4244	75	K	TRINITY_DN102240_c0_g1|g.4244 ORF TRINITY_DN102240_c0_g1|g.4244 TRINITY_DN102240_c0_g1_m.4244 type:complete len:524 (+) TRINITY_DN102240_c0_g1:191-1762(+)	1	0.000273029	121.31	ADTHAK(1)IR	2	1.9432	1
TRINITY_DN102240_c0_g1_m.4244	438	K	TRINITY_DN102240_c0_g1|g.4244 ORF TRINITY_DN102240_c0_g1|g.4244 TRINITY_DN102240_c0_g1_m.4244 type:complete len:524 (+) TRINITY_DN102240_c0_g1:191-1762(+)	1	0.000945039	110.22	LK(1)ANFFER	2	-3.2864	1
TRINITY_DN102242_c0_g1_m.4247	219	K	TRINITY_DN102242_c0_g1|g.4247 ORF TRINITY_DN102242_c0_g1|g.4247 TRINITY_DN102242_c0_g1_m.4247 type:complete len:627 (+) TRINITY_DN102242_c0_g1:22-1902(+)	1	0.0119889	57.279	AINK(1)TIEILDELVEK	2	3.2651	1
TRINITY_DN102242_c0_g1_m.4247	248	K	TRINITY_DN102242_c0_g1|g.4247 ORF TRINITY_DN102242_c0_g1|g.4247 TRINITY_DN102242_c0_g1_m.4247 type:complete len:627 (+) TRINITY_DN102242_c0_g1:22-1902(+)	1	0.00271942	79.059	MK(1)AAVASK	2	0.085183	1
TRINITY_DN102242_c0_g1_m.4247	508	K	TRINITY_DN102242_c0_g1|g.4247 ORF TRINITY_DN102242_c0_g1|g.4247 TRINITY_DN102242_c0_g1_m.4247 type:complete len:627 (+) TRINITY_DN102242_c0_g1:22-1902(+)	1	0.0353954	53.878	LK(1)EFSFK	2	-1.5687	1
TRINITY_DN102242_c0_g1_m.4247	290	K	TRINITY_DN102242_c0_g1|g.4247 ORF TRINITY_DN102242_c0_g1|g.4247 TRINITY_DN102242_c0_g1_m.4247 type:complete len:627 (+) TRINITY_DN102242_c0_g1:22-1902(+)	1	0.000512279	88.42	VAK(1)LVGGGLHNCSVVR	2	-3.4756	1
TRINITY_DN102242_c0_g1_m.4247	316	K	TRINITY_DN102242_c0_g1|g.4247 ORF TRINITY_DN102242_c0_g1|g.4247 TRINITY_DN102242_c0_g1_m.4247 type:complete len:627 (+) TRINITY_DN102242_c0_g1:22-1902(+)	1	0.0252002	50.834	NDATGSIK(1)K	2	1.655	1
TRINITY_DN102242_c0_g1_m.4247	513	K	TRINITY_DN102242_c0_g1|g.4247 ORF TRINITY_DN102242_c0_g1|g.4247 TRINITY_DN102242_c0_g1_m.4247 type:complete len:627 (+) TRINITY_DN102242_c0_g1:22-1902(+)	1	1.14658e-08	91.032	EFSFK(1)ETGLDQYAIAK	2	-0.29653	1
TRINITY_DN102258_c4_g4_m.4275	332	K	TRINITY_DN102258_c4_g4|g.4275 ORF TRINITY_DN102258_c4_g4|g.4275 TRINITY_DN102258_c4_g4_m.4275 type:complete len:520 (-) TRINITY_DN102258_c4_g4:255-1814(-)	1	5.66358e-14	119.52	LAFYDYIGNNPAK(1)GGLFR	2	2.9096	1
TRINITY_DN102258_c4_g4_m.4275	449	K	TRINITY_DN102258_c4_g4|g.4275 ORF TRINITY_DN102258_c4_g4|g.4275 TRINITY_DN102258_c4_g4_m.4275 type:complete len:520 (-) TRINITY_DN102258_c4_g4:255-1814(-)	1	5.45576e-09	154.81	ATLK(1)SDGVFR	2	3.5962	2
TRINITY_DN102260_c1_g1_m.4277	332	K	TRINITY_DN102260_c1_g1|g.4277 ORF TRINITY_DN102260_c1_g1|g.4277 TRINITY_DN102260_c1_g1_m.4277 type:complete len:862 (+) TRINITY_DN102260_c1_g1:208-2793(+)	1	3.61103e-06	124.81	VAELLNQFK(1)GR	2	1.3583	1
TRINITY_DN102274_c10_g2_m.4304	39	K	TRINITY_DN102274_c10_g2|g.4304 ORF TRINITY_DN102274_c10_g2|g.4304 TRINITY_DN102274_c10_g2_m.4304 type:complete len:111 (+) TRINITY_DN102274_c10_g2:219-551(+)	1	0.00460393	79.059	QAK(1)EEAEK	2	-0.39293	1
TRINITY_DN102274_c10_g2_m.4304	73	K	TRINITY_DN102274_c10_g2|g.4304 ORF TRINITY_DN102274_c10_g2|g.4304 TRINITY_DN102274_c10_g2_m.4304 type:complete len:111 (+) TRINITY_DN102274_c10_g2:219-551(+)	1	2.34427e-66	310.69	VAESSGDTGANVK(1)R	2	-1.0594	1
TRINITY_DN102274_c10_g2_m.4304	44	K	TRINITY_DN102274_c10_g2|g.4304 ORF TRINITY_DN102274_c10_g2|g.4304 TRINITY_DN102274_c10_g2_m.4304 type:complete len:111 (+) TRINITY_DN102274_c10_g2:219-551(+)	1	1.32235e-14	153.33	EEAEK(1)EAAEFR	2	-0.3257	1
TRINITY_DN102274_c10_g2_m.4304	82	K	TRINITY_DN102274_c10_g2|g.4304 ORF TRINITY_DN102274_c10_g2|g.4304 TRINITY_DN102274_c10_g2_m.4304 type:complete len:111 (+) TRINITY_DN102274_c10_g2:219-551(+)	1	9.22476e-20	184.98	RLEEETEAK(1)IQSLDSESDR	3	3.2894	4
TRINITY_DN102274_c11_g5_m.4307	120	K	TRINITY_DN102274_c11_g5|g.4307 ORF TRINITY_DN102274_c11_g5|g.4307 TRINITY_DN102274_c11_g5_m.4307 type:complete len:168 (+) TRINITY_DN102274_c11_g5:298-801(+)	1	0.0131393	40.502	FWIHTSNK(1)YR	2	0.2911	1
TRINITY_DN102274_c11_g5_m.4307	157	K	TRINITY_DN102274_c11_g5|g.4307 ORF TRINITY_DN102274_c11_g5|g.4307 TRINITY_DN102274_c11_g5_m.4307 type:complete len:168 (+) TRINITY_DN102274_c11_g5:298-801(+)	1	0.0192596	49.058	IVK(1)TGYR	2	0.50899	1
TRINITY_DN102283_c3_g9_m.4332	57	K	TRINITY_DN102283_c3_g9|g.4332 ORF TRINITY_DN102283_c3_g9|g.4332 TRINITY_DN102283_c3_g9_m.4332 type:internal len:108 (+) TRINITY_DN102283_c3_g9:3-323(+)	1	4.35136e-06	142.56	YTLGYK(1)TVLR	2	-0.66088	1
TRINITY_DN102292_c5_g5_m.4355	112	K	TRINITY_DN102292_c5_g5|g.4355 ORF TRINITY_DN102292_c5_g5|g.4355 TRINITY_DN102292_c5_g5_m.4355 type:complete len:535 (+) TRINITY_DN102292_c5_g5:209-1813(+)	1	0.0225259	43.272	HK(1)IVNAATGR	2	-1.9443	1
TRINITY_DN102293_c5_g3_m.4358	372	K	TRINITY_DN102293_c5_g3|g.4358 ORF TRINITY_DN102293_c5_g3|g.4358 TRINITY_DN102293_c5_g3_m.4358 type:complete len:416 (+) TRINITY_DN102293_c5_g3:159-1406(+)	0.999976	0.000294812	66.509	VSFSGFDGKPEDVLNPK(1)K	2	-3.1574	2
TRINITY_DN102299_c3_g1_m.4368	43	K	TRINITY_DN102299_c3_g1|g.4368 ORF TRINITY_DN102299_c3_g1|g.4368 TRINITY_DN102299_c3_g1_m.4368 type:complete len:342 (+) TRINITY_DN102299_c3_g1:204-1229(+)	1	4.84079e-06	98.167	EIASLIETGAYAK(1)EVR	2	-0.91737	1
TRINITY_DN102303_c4_g2_m.4372	50	K	TRINITY_DN102303_c4_g2|g.4372 ORF TRINITY_DN102303_c4_g2|g.4372 TRINITY_DN102303_c4_g2_m.4372 type:complete len:406 (+) TRINITY_DN102303_c4_g2:318-1535(+)	1	0.0454337	51.531	LGSIAIESALK(1)R	2	-0.51225	1
TRINITY_DN102303_c4_g2_m.4372	287	K	TRINITY_DN102303_c4_g2|g.4372 ORF TRINITY_DN102303_c4_g2|g.4372 TRINITY_DN102303_c4_g2_m.4372 type:complete len:406 (+) TRINITY_DN102303_c4_g2:318-1535(+)	1	0.0163981	62.271	AHELGLQVIAK(1)IR	3	-1.2592	1
TRINITY_DN102308_c0_g1_m.4391	243	K	TRINITY_DN102308_c0_g1|g.4391 ORF TRINITY_DN102308_c0_g1|g.4391 TRINITY_DN102308_c0_g1_m.4391 type:complete len:579 (+) TRINITY_DN102308_c0_g1:197-1933(+)	1	0.0586926	44.767	AENSLK(1)K	2	-0.65967	1
TRINITY_DN102308_c0_g1_m.4391	231	K	TRINITY_DN102308_c0_g1|g.4391 ORF TRINITY_DN102308_c0_g1|g.4391 TRINITY_DN102308_c0_g1_m.4391 type:complete len:579 (+) TRINITY_DN102308_c0_g1:197-1933(+)	0.999998	0.001485	62.454	ADKPLIVFGK(1)GAAYAR	2	-1.8731	2
TRINITY_DN102308_c0_g1_m.4391	363	K	TRINITY_DN102308_c0_g1|g.4391 ORF TRINITY_DN102308_c0_g1|g.4391 TRINITY_DN102308_c0_g1_m.4391 type:complete len:579 (+) TRINITY_DN102308_c0_g1:197-1933(+)	1	0.0165241	53.028	SHPWVAAISK(1)K	2	-2.2543	1
TRINITY_DN102308_c0_g1_m.4391	144	K	TRINITY_DN102308_c0_g1|g.4391 ORF TRINITY_DN102308_c0_g1|g.4391 TRINITY_DN102308_c0_g1_m.4391 type:complete len:579 (+) TRINITY_DN102308_c0_g1:197-1933(+)	1	0.000129199	106	FAAK(1)ATEISHIPR	2	-3.9115	1
TRINITY_DN102328_c0_g1_m.4436	116	K	TRINITY_DN102328_c0_g1|g.4436 ORF TRINITY_DN102328_c0_g1|g.4436 TRINITY_DN102328_c0_g1_m.4436 type:complete len:485 (+) TRINITY_DN102328_c0_g1:111-1565(+)	1	1.45904e-05	84.102	ALK(1)DYYESSNSNVHR	2	-3.6221	1
TRINITY_DN102337_c5_g3_m.4456	188	K	TRINITY_DN102337_c5_g3|g.4456 ORF TRINITY_DN102337_c5_g3|g.4456 TRINITY_DN102337_c5_g3_m.4456 type:5prime_partial len:196 (+) TRINITY_DN102337_c5_g3:2-589(+)	1	3.65981e-06	91.939	NHIVTPSETK(1)YPISAR	2	-5.3502	2
TRINITY_DN102337_c5_g3_m.4456	17	K	TRINITY_DN102337_c5_g3|g.4456 ORF TRINITY_DN102337_c5_g3|g.4456 TRINITY_DN102337_c5_g3_m.4456 type:5prime_partial len:196 (+) TRINITY_DN102337_c5_g3:2-589(+)	1	6.7329e-07	88.734	NFEGLDLGK(1)MEK	2	-2.2291	1
TRINITY_DN102337_c5_g3_m.4456	20	K	TRINITY_DN102337_c5_g3|g.4456 ORF TRINITY_DN102337_c5_g3|g.4456 TRINITY_DN102337_c5_g3_m.4456 type:5prime_partial len:196 (+) TRINITY_DN102337_c5_g3:2-589(+)	1	1.08953e-20	140.78	MEK(1)SDDSGLASYVAGQIDR	2	-0.33303	1
TRINITY_DN102397_c0_g1_m.4583	115	K	TRINITY_DN102397_c0_g1|g.4583 ORF TRINITY_DN102397_c0_g1|g.4583 TRINITY_DN102397_c0_g1_m.4583 type:5prime_partial len:477 (+) TRINITY_DN102397_c0_g1:2-1432(+)	1	0.0350485	56.938	NEALERDLDPEFK(1)RFLLEPR	3	-13.548	1
TRINITY_DN102398_c1_g1_m.4587	61	K	TRINITY_DN102398_c1_g1|g.4587 ORF TRINITY_DN102398_c1_g1|g.4587 TRINITY_DN102398_c1_g1_m.4587 type:complete len:469 (+) TRINITY_DN102398_c1_g1:175-1581(+)	1	0.0616222	41.025	FK(1)NELER	2	1.0115	1
TRINITY_DN102422_c0_g1_m.4640	183	K	TRINITY_DN102422_c0_g1|g.4640 ORF TRINITY_DN102422_c0_g1|g.4640 TRINITY_DN102422_c0_g1_m.4640 type:5prime_partial len:373 (+) TRINITY_DN102422_c0_g1:1-1119(+)	1	0.000212899	76.85	FSK(1)VFNEGMR	2	-2.5666	1
TRINITY_DN102460_c1_g1_m.4730	201	K	TRINITY_DN102460_c1_g1|g.4730 ORF TRINITY_DN102460_c1_g1|g.4730 TRINITY_DN102460_c1_g1_m.4730 type:5prime_partial len:1404 (+) TRINITY_DN102460_c1_g1:3-4214(+)	1	6.9189e-06	75.969	VVK(1)ADADGYVMGASGAR	2	1.9844	1
TRINITY_DN102460_c1_g1_m.4730	296	K	TRINITY_DN102460_c1_g1|g.4730 ORF TRINITY_DN102460_c1_g1|g.4730 TRINITY_DN102460_c1_g1_m.4730 type:5prime_partial len:1404 (+) TRINITY_DN102460_c1_g1:3-4214(+)	1	0.0131108	44.82	VREDLQNK(1)LDFLR	3	-1.3966	1
TRINITY_DN102460_c1_g1_m.4730	259	K	TRINITY_DN102460_c1_g1|g.4730 ORF TRINITY_DN102460_c1_g1|g.4730 TRINITY_DN102460_c1_g1_m.4730 type:5prime_partial len:1404 (+) TRINITY_DN102460_c1_g1:3-4214(+)	1	0.000450774	73.891	WSTK(1)NQEAISEALK	2	-4.3812	1
TRINITY_DN102460_c1_g1_m.4730	967	K	TRINITY_DN102460_c1_g1|g.4730 ORF TRINITY_DN102460_c1_g1|g.4730 TRINITY_DN102460_c1_g1_m.4730 type:5prime_partial len:1404 (+) TRINITY_DN102460_c1_g1:3-4214(+)	1	1.84753e-06	94.791	FK(1)LDEGAEIKPR	2	0.0015295	1
TRINITY_DN102467_c0_g1_m.4743	60	K	TRINITY_DN102467_c0_g1|g.4743 ORF TRINITY_DN102467_c0_g1|g.4743 TRINITY_DN102467_c0_g1_m.4743 type:5prime_partial len:370 (+) TRINITY_DN102467_c0_g1:1-1110(+)	1	1.5662e-13	78.779	TMHAVQYGSYGGGADALK(1)HVEVLVPSPK	3	-2.4042	1
TRINITY_DN102467_c0_g1_m.4743	353	K	TRINITY_DN102467_c0_g1|g.4743 ORF TRINITY_DN102467_c0_g1|g.4743 TRINITY_DN102467_c0_g1_m.4743 type:5prime_partial len:370 (+) TRINITY_DN102467_c0_g1:1-1110(+)	1	1.14832e-05	96.313	AEEAWAK(1)SMSGHATGK	2	-3.3468	1
TRINITY_DN102467_c0_g1_m.4743	89	K	TRINITY_DN102467_c0_g1|g.4743 ORF TRINITY_DN102467_c0_g1|g.4743 TRINITY_DN102467_c0_g1_m.4743 type:5prime_partial len:370 (+) TRINITY_DN102467_c0_g1:1-1110(+)	1	2.24242e-05	81.48	IEAAAINPFDWK(1)VQK	2	2.9579	1
TRINITY_DN102469_c0_g1_m.4757	165	K	TRINITY_DN102469_c0_g1|g.4757 ORF TRINITY_DN102469_c0_g1|g.4757 TRINITY_DN102469_c0_g1_m.4757 type:complete len:985 (+) TRINITY_DN102469_c0_g1:37-2991(+)	1	2.00408e-05	91.939	LK(1)IDEDYSAPSAPSK	2	-0.065256	1
TRINITY_DN102470_c0_g3_m.4759	135	K	TRINITY_DN102470_c0_g3|g.4759 ORF TRINITY_DN102470_c0_g3|g.4759 TRINITY_DN102470_c0_g3_m.4759 type:3prime_partial len:263 (+) TRINITY_DN102470_c0_g3:110-895(+)	1	1.56094e-09	98.009	VK(1)QYAMQQAFK	2	-2.5647	2
TRINITY_DN102484_c0_g5_m.4782	205	K	TRINITY_DN102484_c0_g5|g.4782 ORF TRINITY_DN102484_c0_g5|g.4782 TRINITY_DN102484_c0_g5_m.4782 type:complete len:239 (+) TRINITY_DN102484_c0_g5:98-814(+)	1	0.00248697	86.205	ILFEEVVK(1)K	2	-2.0568	1
TRINITY_DN102484_c0_g5_m.4782	182	K	TRINITY_DN102484_c0_g5|g.4782 ORF TRINITY_DN102484_c0_g5|g.4782 TRINITY_DN102484_c0_g5_m.4782 type:complete len:239 (+) TRINITY_DN102484_c0_g5:98-814(+)	1	0.000617455	40.861	MQQFSGWEK(1)SFLR	2	3.7736	1
TRINITY_DN102523_c1_g1_m.4888	549	K	TRINITY_DN102523_c1_g1|g.4888 ORF TRINITY_DN102523_c1_g1|g.4888 TRINITY_DN102523_c1_g1_m.4888 type:complete len:1047 (+) TRINITY_DN102523_c1_g1:255-3395(+)	1	0.00479693	81.335	NEEEANLEAK(1)R	2	-1.7117	1
TRINITY_DN102523_c1_g1_m.4888	383	K	TRINITY_DN102523_c1_g1|g.4888 ORF TRINITY_DN102523_c1_g1|g.4888 TRINITY_DN102523_c1_g1_m.4888 type:complete len:1047 (+) TRINITY_DN102523_c1_g1:255-3395(+)	1	0.0121791	50.314	ITPAHDPNDFEVGK(1)R	3	2.0783	1
TRINITY_DN102523_c1_g1_m.4888	37	K	TRINITY_DN102523_c1_g1|g.4888 ORF TRINITY_DN102523_c1_g1|g.4888 TRINITY_DN102523_c1_g1_m.4888 type:complete len:1047 (+) TRINITY_DN102523_c1_g1:255-3395(+)	1	0.0590312	42.835	AEATK(1)LQK	2	-0.81391	1
TRINITY_DN102527_c0_g3_m.4901	158	K	TRINITY_DN102527_c0_g3|g.4901 ORF TRINITY_DN102527_c0_g3|g.4901 TRINITY_DN102527_c0_g3_m.4901 type:5prime_partial len:191 (+) TRINITY_DN102527_c0_g3:1-573(+)	1	5.44816e-14	126.48	FFK(1)NLCPDAYSYPK	2	0.53157	1
TRINITY_DN102527_c0_g3_m.4901	169	K	TRINITY_DN102527_c0_g3|g.4901 ORF TRINITY_DN102527_c0_g3|g.4901 TRINITY_DN102527_c0_g3_m.4901 type:5prime_partial len:191 (+) TRINITY_DN102527_c0_g3:1-573(+)	1	8.37997e-34	153.86	NLCPDAYSYPK(1)DDQTSTFTCPAGTNYR	3	-0.041552	1
TRINITY_DN102535_c0_g2_m.4915	316	K	TRINITY_DN102535_c0_g2|g.4915 ORF TRINITY_DN102535_c0_g2|g.4915 TRINITY_DN102535_c0_g2_m.4915 type:complete len:626 (+) TRINITY_DN102535_c0_g2:226-2103(+)	1	0.000118134	72.922	DIHYTVDEK(1)QK	2	-1.4826	1
TRINITY_DN102535_c0_g2_m.4916	232	K	TRINITY_DN102535_c0_g2|g.4916 ORF TRINITY_DN102535_c0_g2|g.4916 TRINITY_DN102535_c0_g2_m.4916 type:complete len:354 (+) TRINITY_DN102535_c0_g2:2252-3313(+)	1	0.0464742	55.754	EAYFQK(1)TEMVEK	2	-0.27617	1
TRINITY_DN102553_c0_g4_m.4950	314	K	TRINITY_DN102553_c0_g4|g.4950 ORF TRINITY_DN102553_c0_g4|g.4950 TRINITY_DN102553_c0_g4_m.4950 type:complete len:418 (+) TRINITY_DN102553_c0_g4:94-1347(+)	1	2.87734e-06	97.175	AYMDSLK(1)EPGPTGK	2	2.7933	1
TRINITY_DN102564_c0_g1_m.4983	392	K	TRINITY_DN102564_c0_g1|g.4983 ORF TRINITY_DN102564_c0_g1|g.4983 TRINITY_DN102564_c0_g1_m.4983 type:5prime_partial len:623 (+) TRINITY_DN102564_c0_g1:3-1871(+)	1	4.08411e-06	80.128	TISTK(1)GMLSVYNSLSEEGK	2	0.30442	1
TRINITY_DN102564_c0_g1_m.4983	468	K	TRINITY_DN102564_c0_g1|g.4983 ORF TRINITY_DN102564_c0_g1|g.4983 TRINITY_DN102564_c0_g1_m.4983 type:5prime_partial len:623 (+) TRINITY_DN102564_c0_g1:3-1871(+)	1	0.00907629	70.67	MWK(1)VGER	2	-0.7164	1
TRINITY_DN102564_c0_g1_m.4983	366	K	TRINITY_DN102564_c0_g1|g.4983 ORF TRINITY_DN102564_c0_g1|g.4983 TRINITY_DN102564_c0_g1_m.4983 type:5prime_partial len:623 (+) TRINITY_DN102564_c0_g1:3-1871(+)	1	1.15858e-07	126.48	YTEK(1)GMNEELAYK	2	-1.6327	1
TRINITY_DN102564_c0_g1_m.4983	148	K	TRINITY_DN102564_c0_g1|g.4983 ORF TRINITY_DN102564_c0_g1|g.4983 TRINITY_DN102564_c0_g1_m.4983 type:5prime_partial len:623 (+) TRINITY_DN102564_c0_g1:3-1871(+)	1	0.00178016	54.27	DLFGLLPEAFK(1)GIK	2	4.2394	1
TRINITY_DN102585_c2_g1_m.5022	615	K	TRINITY_DN102585_c2_g1|g.5022 ORF TRINITY_DN102585_c2_g1|g.5022 TRINITY_DN102585_c2_g1_m.5022 type:complete len:817 (+) TRINITY_DN102585_c2_g1:301-2751(+)	1	0.00435363	54.556	ELANLVVVAGDHAK(1)ASK	2	-3.431	1
TRINITY_DN102585_c2_g1_m.5022	373	K	TRINITY_DN102585_c2_g1|g.5022 ORF TRINITY_DN102585_c2_g1|g.5022 TRINITY_DN102585_c2_g1_m.5022 type:complete len:817 (+) TRINITY_DN102585_c2_g1:301-2751(+)	1	0.0181665	75.243	TEK(1)GIIR	2	-0.31146	1
TRINITY_DN102585_c2_g1_m.5022	169	K	TRINITY_DN102585_c2_g1|g.5022 ORF TRINITY_DN102585_c2_g1|g.5022 TRINITY_DN102585_c2_g1_m.5022 type:complete len:817 (+) TRINITY_DN102585_c2_g1:301-2751(+)	1	0.0121204	69.276	HLSSK(1)LFHDK	2	-2.0228	1
TRINITY_DN102593_c2_g1_m.5034	105	K	TRINITY_DN102593_c2_g1|g.5034 ORF TRINITY_DN102593_c2_g1|g.5034 TRINITY_DN102593_c2_g1_m.5034 type:complete len:359 (+) TRINITY_DN102593_c2_g1:226-1302(+)	1	0.00474944	96.311	LPK(1)EFDAR	2	-1.2173	1
TRINITY_DN102600_c0_g1_m.5048	25	K	TRINITY_DN102600_c0_g1|g.5048 ORF TRINITY_DN102600_c0_g1|g.5048 TRINITY_DN102600_c0_g1_m.5048 type:complete len:399 (+) TRINITY_DN102600_c0_g1:299-1495(+)	1	0.000290229	102.55	LLNYK(1)EQESR	2	-0.52198	1
TRINITY_DN102600_c0_g1_m.5048	319	K	TRINITY_DN102600_c0_g1|g.5048 ORF TRINITY_DN102600_c0_g1|g.5048 TRINITY_DN102600_c0_g1_m.5048 type:complete len:399 (+) TRINITY_DN102600_c0_g1:299-1495(+)	1	0.000291545	72.846	MEILK(1)IHAAGIAK	2	2.4105	1
TRINITY_DN102605_c0_g3_m.5060	587	K	TRINITY_DN102605_c0_g3|g.5060 ORF TRINITY_DN102605_c0_g3|g.5060 TRINITY_DN102605_c0_g3_m.5060 type:complete len:688 (+) TRINITY_DN102605_c0_g3:186-2249(+)	1	0.0109395	54.436	VK(1)IQDLEK	2	0.65235	1
TRINITY_DN102649_c2_g1_m.5144	448	K	TRINITY_DN102649_c2_g1|g.5144 ORF TRINITY_DN102649_c2_g1|g.5144 TRINITY_DN102649_c2_g1_m.5144 type:5prime_partial len:469 (+) TRINITY_DN102649_c2_g1:3-1409(+)	1	2.11962e-05	107.08	GAGHEVPLHK(1)PR	3	0.86154	2
TRINITY_DN102650_c0_g1_m.5147	660	K	TRINITY_DN102650_c0_g1|g.5147 ORF TRINITY_DN102650_c0_g1|g.5147 TRINITY_DN102650_c0_g1_m.5147 type:complete len:954 (+) TRINITY_DN102650_c0_g1:330-3191(+)	1	0.0661389	49.097	TEK(1)SLWAGNEVEVQR	2	-4.4441	1
TRINITY_DN102654_c1_g3_m.5151	57	K	TRINITY_DN102654_c1_g3|g.5151 ORF TRINITY_DN102654_c1_g3|g.5151 TRINITY_DN102654_c1_g3_m.5151 type:complete len:494 (+) TRINITY_DN102654_c1_g3:111-1592(+)	1	0.000224843	82.437	NHGK(1)NLYYYFVESER	2	0.23132	2
TRINITY_DN102663_c3_g1_m.5161	80	K	TRINITY_DN102663_c3_g1|g.5161 ORF TRINITY_DN102663_c3_g1|g.5161 TRINITY_DN102663_c3_g1_m.5161 type:complete len:203 (+) TRINITY_DN102663_c3_g1:178-786(+)	1	2.98351e-06	97.268	IK(1)SISVVGGAEGTSPSK	2	-2.7243	1
TRINITY_DN102731_c0_g1_m.5291	530	K	TRINITY_DN102731_c0_g1|g.5291 ORF TRINITY_DN102731_c0_g1|g.5291 TRINITY_DN102731_c0_g1_m.5291 type:5prime_partial len:702 (+) TRINITY_DN102731_c0_g1:2-2107(+)	1	2.68447e-05	95.138	FAANVVELPGGIK(1)K	2	-2.3352	1
TRINITY_DN102736_c1_g2_m.5304	203	K	TRINITY_DN102736_c1_g2|g.5304 ORF TRINITY_DN102736_c1_g2|g.5304 TRINITY_DN102736_c1_g2_m.5304 type:5prime_partial len:373 (+) TRINITY_DN102736_c1_g2:2-1120(+)	1	0.00506616	55.235	SIDELFEK(1)GR	2	-2.7365	1
TRINITY_DN102742_c0_g1_m.5316	81	K	TRINITY_DN102742_c0_g1|g.5316 ORF TRINITY_DN102742_c0_g1|g.5316 TRINITY_DN102742_c0_g1_m.5316 type:complete len:308 (+) TRINITY_DN102742_c0_g1:263-1186(+)	1	0.00288743	73.655	HQEVGHK(1)SLLK	3	1.0429	1
TRINITY_DN102742_c0_g1_m.5316	107	K	TRINITY_DN102742_c0_g1|g.5316 ORF TRINITY_DN102742_c0_g1|g.5316 TRINITY_DN102742_c0_g1_m.5316 type:complete len:308 (+) TRINITY_DN102742_c0_g1:263-1186(+)	1	0.0178022	52.591	EPESMK(1)ELR	2	3.3933	1
TRINITY_DN102755_c2_g1_m.5350	313	K	TRINITY_DN102755_c2_g1|g.5350 ORF TRINITY_DN102755_c2_g1|g.5350 TRINITY_DN102755_c2_g1_m.5350 type:complete len:423 (+) TRINITY_DN102755_c2_g1:130-1398(+)	1	3.24807e-05	96.957	TIEDTWNLFHK(1)K	2	-0.77111	1
TRINITY_DN102766_c0_g2_m.5370	357	K	TRINITY_DN102766_c0_g2|g.5370 ORF TRINITY_DN102766_c0_g2|g.5370 TRINITY_DN102766_c0_g2_m.5370 type:complete len:727 (+) TRINITY_DN102766_c0_g2:59-2239(+)	1	0.0139522	59.67	EFTLAEIEHFVDPK(1)DK	2	6.3051	1
TRINITY_DN102766_c0_g2_m.5370	508	K	TRINITY_DN102766_c0_g2|g.5370 ORF TRINITY_DN102766_c0_g2|g.5370 TRINITY_DN102766_c0_g2_m.5370 type:complete len:727 (+) TRINITY_DN102766_c0_g2:59-2239(+)	1	0.00129928	69.716	ELGLAFK(1)GNQK	2	-0.0055865	1
TRINITY_DN102766_c0_g2_m.5370	258	K	TRINITY_DN102766_c0_g2|g.5370 ORF TRINITY_DN102766_c0_g2|g.5370 TRINITY_DN102766_c0_g2_m.5370 type:complete len:727 (+) TRINITY_DN102766_c0_g2:59-2239(+)	1	4.63441e-05	119.55	LK(1)EYGITAPDTK	2	-1.7747	1
TRINITY_DN102790_c0_g1_m.5426	300	K	TRINITY_DN102790_c0_g1|g.5426 ORF TRINITY_DN102790_c0_g1|g.5426 TRINITY_DN102790_c0_g1_m.5426 type:complete len:757 (+) TRINITY_DN102790_c0_g1:347-2617(+)	1	0.0022443	69.915	MK(1)EQEALK	2	1.9977	1
TRINITY_DN102792_c6_g1_m.5430	143	K	TRINITY_DN102792_c6_g1|g.5430 ORF TRINITY_DN102792_c6_g1|g.5430 TRINITY_DN102792_c6_g1_m.5430 type:complete len:154 (-) TRINITY_DN102792_c6_g1:93-554(-)	0.933131	0.0437797	85.716	TPPPEPK(0.933)K(0.067)PK	2	0.12736	1
TRINITY_DN102807_c3_g4_m.5462	228	K	TRINITY_DN102807_c3_g4|g.5462 ORF TRINITY_DN102807_c3_g4|g.5462 TRINITY_DN102807_c3_g4_m.5462 type:complete len:411 (+) TRINITY_DN102807_c3_g4:115-1347(+)	1	0.0464656	42.835	ASK(1)IMQAR	2	-2.5606	1
TRINITY_DN102851_c1_g1_m.5549	203	K	TRINITY_DN102851_c1_g1|g.5549 ORF TRINITY_DN102851_c1_g1|g.5549 TRINITY_DN102851_c1_g1_m.5549 type:5prime_partial len:395 (+) TRINITY_DN102851_c1_g1:1-1185(+)	1	0.00184165	93.467	LPAVVSK(1)LHK	2	1.0003	1
TRINITY_DN102851_c1_g1_m.5549	206	K	TRINITY_DN102851_c1_g1|g.5549 ORF TRINITY_DN102851_c1_g1|g.5549 TRINITY_DN102851_c1_g1_m.5549 type:5prime_partial len:395 (+) TRINITY_DN102851_c1_g1:1-1185(+)	1	0.00381161	96.666	LHK(1)AINR	2	0.62272	1
TRINITY_DN102851_c1_g1_m.5549	247	K	TRINITY_DN102851_c1_g1|g.5549 ORF TRINITY_DN102851_c1_g1|g.5549 TRINITY_DN102851_c1_g1_m.5549 type:5prime_partial len:395 (+) TRINITY_DN102851_c1_g1:1-1185(+)	1	0.0142036	51.531	LSEAHK(1)FLQSR	2	-1.3084	1
TRINITY_DN102853_c0_g1_m.5556	800	K	TRINITY_DN102853_c0_g1|g.5556 ORF TRINITY_DN102853_c0_g1|g.5556 TRINITY_DN102853_c0_g1_m.5556 type:complete len:956 (+) TRINITY_DN102853_c0_g1:403-3270(+)	1	0.067179	44.82	TWAEEEAK(1)R	2	-0.25179	1
TRINITY_DN102902_c1_g3_m.5661	80	K	TRINITY_DN102902_c1_g3|g.5661 ORF TRINITY_DN102902_c1_g3|g.5661 TRINITY_DN102902_c1_g3_m.5661 type:5prime_partial len:175 (+) TRINITY_DN102902_c1_g3:2-526(+)	1	0.000836946	83.623	GEEFEQTK(1)K	2	1.3489	1
TRINITY_DN102902_c3_g1_m.5664	89	K	TRINITY_DN102902_c3_g1|g.5664 ORF TRINITY_DN102902_c3_g1|g.5664 TRINITY_DN102902_c3_g1_m.5664 type:complete len:472 (+) TRINITY_DN102902_c3_g1:132-1547(+)	1	3.36402e-06	138.23	ILYSQK(1)DVLAR	2	1.4663	1
TRINITY_DN102910_c56_g26_m.5674	278	K	TRINITY_DN102910_c56_g26|g.5674 ORF TRINITY_DN102910_c56_g26|g.5674 TRINITY_DN102910_c56_g26_m.5674 type:complete len:358 (+) TRINITY_DN102910_c56_g26:168-1241(+)	1	2.23485e-18	214.14	HK(1)EHIASYGEGNER	3	0.80029	2
TRINITY_DN102910_c56_g26_m.5674	326	K	TRINITY_DN102910_c56_g26|g.5674 ORF TRINITY_DN102910_c56_g26|g.5674 TRINITY_DN102910_c56_g26_m.5674 type:complete len:358 (+) TRINITY_DN102910_c56_g26:168-1241(+)	1	0.0178022	52.591	NGK(1)GYFEDR	2	0.36821	1
TRINITY_DN102910_c56_g26_m.5674	255	K	TRINITY_DN102910_c56_g26|g.5674 ORF TRINITY_DN102910_c56_g26|g.5674 TRINITY_DN102910_c56_g26_m.5674 type:complete len:358 (+) TRINITY_DN102910_c56_g26:168-1241(+)	1	0.000555623	54.813	PIQGDWNGAGAHTNYSTK(1)SMR	3	1.9635	1
TRINITY_DN102910_c56_g26_m.5674	267	K	TRINITY_DN102910_c56_g26|g.5674 ORF TRINITY_DN102910_c56_g26|g.5674 TRINITY_DN102910_c56_g26_m.5674 type:complete len:358 (+) TRINITY_DN102910_c56_g26:168-1241(+)	1	0.000221593	115.86	EEGGYEIIK(1)K	2	-1.2393	1
TRINITY_DN102922_c0_g2_m.5700	610	K	TRINITY_DN102922_c0_g2|g.5700 ORF TRINITY_DN102922_c0_g2|g.5700 TRINITY_DN102922_c0_g2_m.5700 type:complete len:858 (+) TRINITY_DN102922_c0_g2:238-2811(+)	1	9.2101e-08	128.97	LLATSGSHEDLFK(1)K	2	-1.7386	1
TRINITY_DN102922_c0_g2_m.5700	394	K	TRINITY_DN102922_c0_g2|g.5700 ORF TRINITY_DN102922_c0_g2|g.5700 TRINITY_DN102922_c0_g2_m.5700 type:complete len:858 (+) TRINITY_DN102922_c0_g2:238-2811(+)	1	8.04039e-09	172.92	TQAEK(1)LQQGSEITR	2	-1.9398	1
TRINITY_DN102922_c0_g2_m.5700	361	K	TRINITY_DN102922_c0_g2|g.5700 ORF TRINITY_DN102922_c0_g2|g.5700 TRINITY_DN102922_c0_g2_m.5700 type:complete len:858 (+) TRINITY_DN102922_c0_g2:238-2811(+)	1	0.00391239	79.235	PVLMNEVLDASK(1)ER	2	1.2996	1
TRINITY_DN102931_c0_g1_m.5722	590	K	TRINITY_DN102931_c0_g1|g.5722 ORF TRINITY_DN102931_c0_g1|g.5722 TRINITY_DN102931_c0_g1_m.5722 type:complete len:609 (+) TRINITY_DN102931_c0_g1:270-2096(+)	1	0.0168056	62.705	SIGLIGHTFDQK(1)R	2	1.965	1
TRINITY_DN102931_c0_g1_m.5722	19	K	TRINITY_DN102931_c0_g1|g.5722 ORF TRINITY_DN102931_c0_g1|g.5722 TRINITY_DN102931_c0_g1_m.5722 type:complete len:609 (+) TRINITY_DN102931_c0_g1:270-2096(+)	1	0.00014298	88.734	NTQALFYNYK(1)QLPIQR	2	-1.4406	1
TRINITY_DN102942_c0_g1_m.5737	317	K	TRINITY_DN102942_c0_g1|g.5737 ORF TRINITY_DN102942_c0_g1|g.5737 TRINITY_DN102942_c0_g1_m.5737 type:complete len:378 (+) TRINITY_DN102942_c0_g1:293-1426(+)	1	4.30429e-06	108.91	MSK(1)EITALAPSSMK	2	-0.051429	2
TRINITY_DN102942_c0_g1_m.5737	330	K	TRINITY_DN102942_c0_g1|g.5737 ORF TRINITY_DN102942_c0_g1|g.5737 TRINITY_DN102942_c0_g1_m.5737 type:complete len:378 (+) TRINITY_DN102942_c0_g1:293-1426(+)	1	8.60141e-06	154.28	IK(1)VVAPPER	2	-0.83626	1
TRINITY_DN102942_c0_g1_m.5737	193	K	TRINITY_DN102942_c0_g1|g.5737 ORF TRINITY_DN102942_c0_g1|g.5737 TRINITY_DN102942_c0_g1_m.5737 type:complete len:378 (+) TRINITY_DN102942_c0_g1:293-1426(+)	1	2.74939e-11	136.06	DLTDSLMK(1)ILTER	2	0.76121	1
TRINITY_DN102953_c4_g2_m.5767	288	K	TRINITY_DN102953_c4_g2|g.5767 ORF TRINITY_DN102953_c4_g2|g.5767 TRINITY_DN102953_c4_g2_m.5767 type:complete len:354 (+) TRINITY_DN102953_c4_g2:178-1239(+)	1	0.000433215	52.837	LVMAAFPK(1)AVELIK	2	-0.43993	1
TRINITY_DN102957_c0_g2_m.5778	283	K	TRINITY_DN102957_c0_g2|g.5778 ORF TRINITY_DN102957_c0_g2|g.5778 TRINITY_DN102957_c0_g2_m.5778 type:complete len:969 (+) TRINITY_DN102957_c0_g2:98-3004(+)	1	0.00285506	74.269	HYK(1)EGLSK	2	0.7141	1
TRINITY_DN102987_c1_g1_m.5842	530	K	TRINITY_DN102987_c1_g1|g.5842 ORF TRINITY_DN102987_c1_g1|g.5842 TRINITY_DN102987_c1_g1_m.5842 type:5prime_partial len:630 (+) TRINITY_DN102987_c1_g1:2-1891(+)	1	0.00929083	66.664	LSDEWK(1)EHSTK	2	-1.8178	1
TRINITY_DN103010_c1_g1_m.5891	269	K	TRINITY_DN103010_c1_g1|g.5891 ORF TRINITY_DN103010_c1_g1|g.5891 TRINITY_DN103010_c1_g1_m.5891 type:complete len:863 (+) TRINITY_DN103010_c1_g1:142-2730(+)	1	0.00300743	63.766	FGHLK(1)FADFLGYGLK	2	3.9318	1
TRINITY_DN103010_c1_g1_m.5891	173	K	TRINITY_DN103010_c1_g1|g.5891 ORF TRINITY_DN103010_c1_g1|g.5891 TRINITY_DN103010_c1_g1_m.5891 type:complete len:863 (+) TRINITY_DN103010_c1_g1:142-2730(+)	1	9.61896e-07	65.421	IFFANDTYLPEHTPGPLK(1)GYR	3	-2.6786	1
TRINITY_DN103010_c1_g1_m.5891	134	K	TRINITY_DN103010_c1_g1|g.5891 ORF TRINITY_DN103010_c1_g1|g.5891 TRINITY_DN103010_c1_g1_m.5891 type:complete len:863 (+) TRINITY_DN103010_c1_g1:142-2730(+)	1	9.12592e-05	90.263	SITIDDFPGK(1)GR	2	-0.07685	1
TRINITY_DN103010_c1_g1_m.5891	752	K	TRINITY_DN103010_c1_g1|g.5891 ORF TRINITY_DN103010_c1_g1|g.5891 TRINITY_DN103010_c1_g1_m.5891 type:complete len:863 (+) TRINITY_DN103010_c1_g1:142-2730(+)	1	0.00462478	55.354	FMPQPGTAEYEELEK(1)NPEK	2	-0.52719	1
TRINITY_DN103010_c1_g1_m.5891	550	K	TRINITY_DN103010_c1_g1|g.5891 ORF TRINITY_DN103010_c1_g1|g.5891 TRINITY_DN103010_c1_g1_m.5891 type:complete len:863 (+) TRINITY_DN103010_c1_g1:142-2730(+)	1	5.51579e-14	166.71	QLSALHPINK(1)LLAPHYR	3	-0.14202	1
TRINITY_DN103010_c1_g1_m.5891	451	K	TRINITY_DN103010_c1_g1|g.5891 ORF TRINITY_DN103010_c1_g1|g.5891 TRINITY_DN103010_c1_g1_m.5891 type:complete len:863 (+) TRINITY_DN103010_c1_g1:142-2730(+)	1	1.86166e-10	143.22	INSTDNK(1)IYASR	2	-3.0731	1
TRINITY_DN103031_c1_g1_m.5935	252	K	TRINITY_DN103031_c1_g1|g.5935 ORF TRINITY_DN103031_c1_g1|g.5935 TRINITY_DN103031_c1_g1_m.5935 type:5prime_partial len:419 (+) TRINITY_DN103031_c1_g1:3-1259(+)	1	0.00155057	78.932	IK(1)GVSSINIIR	2	0.19155	1
TRINITY_DN103031_c1_g1_m.5935	372	K	TRINITY_DN103031_c1_g1|g.5935 ORF TRINITY_DN103031_c1_g1|g.5935 TRINITY_DN103031_c1_g1_m.5935 type:5prime_partial len:419 (+) TRINITY_DN103031_c1_g1:3-1259(+)	1	2.14663e-12	113.34	PK(1)IDYLLSLVQDGK	2	1.484	1
TRINITY_DN103031_c1_g1_m.5935	196	K	TRINITY_DN103031_c1_g1|g.5935 ORF TRINITY_DN103031_c1_g1|g.5935 TRINITY_DN103031_c1_g1_m.5935 type:5prime_partial len:419 (+) TRINITY_DN103031_c1_g1:3-1259(+)	1	0.000164322	106	EENAWHK(1)ISK	2	-0.062502	1
TRINITY_DN103031_c1_g1_m.5935	270	K	TRINITY_DN103031_c1_g1|g.5935 ORF TRINITY_DN103031_c1_g1|g.5935 TRINITY_DN103031_c1_g1_m.5935 type:5prime_partial len:419 (+) TRINITY_DN103031_c1_g1:3-1259(+)	1	0.0302584	50.09	DRPGSEEVK(1)EK	2	-1.1266	1
TRINITY_DN103071_c1_g6_m.6030	22	K	TRINITY_DN103071_c1_g6|g.6030 ORF TRINITY_DN103071_c1_g6|g.6030 TRINITY_DN103071_c1_g6_m.6030 type:5prime_partial len:274 (+) TRINITY_DN103071_c1_g6:3-824(+)	1	7.89128e-07	99.174	TIK(1)FYTECFGMK	2	-2.551	1
TRINITY_DN103071_c1_g6_m.6030	233	K	TRINITY_DN103071_c1_g6|g.6030 ORF TRINITY_DN103071_c1_g6|g.6030 TRINITY_DN103071_c1_g6_m.6030 type:5prime_partial len:274 (+) TRINITY_DN103071_c1_g6:3-824(+)	1	0.0214517	51.864	ELGGK(1)ITR	2	0.21691	1
TRINITY_DN103071_c1_g6_m.6030	156	K	TRINITY_DN103071_c1_g6|g.6030 ORF TRINITY_DN103071_c1_g6|g.6030 TRINITY_DN103071_c1_g6_m.6030 type:5prime_partial len:274 (+) TRINITY_DN103071_c1_g6:3-824(+)	1	6.57005e-07	103.87	SIQFYEK(1)ACGMK	2	8.4836	1
TRINITY_DN103071_c1_g6_m.6030	228	K	TRINITY_DN103071_c1_g6|g.6030 ORF TRINITY_DN103071_c1_g6|g.6030 TRINITY_DN103071_c1_g6_m.6030 type:5prime_partial len:274 (+) TRINITY_DN103071_c1_g6:3-824(+)	1	3.2886e-18	184.65	SAQVVELVTK(1)ELGGK	2	2.4855	1
TRINITY_DN103071_c1_g6_m.6030	258	K	TRINITY_DN103071_c1_g6|g.6030 ORF TRINITY_DN103071_c1_g6|g.6030 TRINITY_DN103071_c1_g6_m.6030 type:5prime_partial len:274 (+) TRINITY_DN103071_c1_g6:3-824(+)	1	0.0108349	46.528	VTSFLDPDGWK(1)VVFVDHSDFLK	3	1.8128	1
TRINITY_DN103088_c0_g2_m.6050	224	K	TRINITY_DN103088_c0_g2|g.6050 ORF TRINITY_DN103088_c0_g2|g.6050 TRINITY_DN103088_c0_g2_m.6050 type:complete len:402 (+) TRINITY_DN103088_c0_g2:188-1393(+)	1	0.0724473	58.687	K(1)FYTEEK	2	-3.3053	1
TRINITY_DN103095_c2_g16_m.6072	160	K	TRINITY_DN103095_c2_g16|g.6072 ORF TRINITY_DN103095_c2_g16|g.6072 TRINITY_DN103095_c2_g16_m.6072 type:5prime_partial len:219 (+) TRINITY_DN103095_c2_g16:1-657(+)	1	0.00590269	76.833	VEEMVK(1)R	2	-0.90814	1
TRINITY_DN103105_c0_g1_m.6090	133	K	TRINITY_DN103105_c0_g1|g.6090 ORF TRINITY_DN103105_c0_g1|g.6090 TRINITY_DN103105_c0_g1_m.6090 type:complete len:645 (+) TRINITY_DN103105_c0_g1:1029-2963(+)	1	0.0497616	67.903	DLHK(1)AIK	2	1.107	1
TRINITY_DN103119_c2_g2_m.6120	247	K	TRINITY_DN103119_c2_g2|g.6120 ORF TRINITY_DN103119_c2_g2|g.6120 TRINITY_DN103119_c2_g2_m.6120 type:5prime_partial len:522 (+) TRINITY_DN103119_c2_g2:2-1567(+)	1	0.0301866	49.16	IYYNEYNSK(1)K	2	-0.12299	1
TRINITY_DN103126_c1_g1_m.6144	426	K	TRINITY_DN103126_c1_g1|g.6144 ORF TRINITY_DN103126_c1_g1|g.6144 TRINITY_DN103126_c1_g1_m.6144 type:complete len:620 (+) TRINITY_DN103126_c1_g1:835-2694(+)	1	0.00124233	79.795	WTK(1)EMSYADYYEK	2	-1.0849	1
TRINITY_DN103143_c0_g1_m.6175	332	K	TRINITY_DN103143_c0_g1|g.6175 ORF TRINITY_DN103143_c0_g1|g.6175 TRINITY_DN103143_c0_g1_m.6175 type:complete len:654 (+) TRINITY_DN103143_c0_g1:253-2214(+)	1	6.88292e-05	84.309	AIK(1)NHFELDGLR	2	-5.2851	1
TRINITY_DN103144_c0_g4_m.6178	340	K	TRINITY_DN103144_c0_g4|g.6178 ORF TRINITY_DN103144_c0_g4|g.6178 TRINITY_DN103144_c0_g4_m.6178 type:5prime_partial len:510 (+) TRINITY_DN103144_c0_g4:3-1532(+)	1	0.0102755	65.879	VVK(1)HSEPYVVGK	2	-3.7395	1
TRINITY_DN103144_c0_g4_m.6178	297	K	TRINITY_DN103144_c0_g4|g.6178 ORF TRINITY_DN103144_c0_g4|g.6178 TRINITY_DN103144_c0_g4_m.6178 type:5prime_partial len:510 (+) TRINITY_DN103144_c0_g4:3-1532(+)	1	0.000618351	61.042	NLEDANK(1)DAYLDR	2	0.63437	1
TRINITY_DN103154_c0_g1_m.6194	269	K	TRINITY_DN103154_c0_g1|g.6194 ORF TRINITY_DN103154_c0_g1|g.6194 TRINITY_DN103154_c0_g1_m.6194 type:complete len:546 (+) TRINITY_DN103154_c0_g1:883-2520(+)	1	0.00145337	83.438	YVAVGNEDCGK(1)K	2	-1.4116	1
TRINITY_DN103154_c0_g1_m.6194	457	K	TRINITY_DN103154_c0_g1|g.6194 ORF TRINITY_DN103154_c0_g1|g.6194 TRINITY_DN103154_c0_g1_m.6194 type:complete len:546 (+) TRINITY_DN103154_c0_g1:883-2520(+)	1	4.92742e-08	108.24	IK(1)IVNVGSNTVNLK	2	-1.1926	1
TRINITY_DN103154_c0_g1_m.6194	160	K	TRINITY_DN103154_c0_g1|g.6194 ORF TRINITY_DN103154_c0_g1|g.6194 TRINITY_DN103154_c0_g1_m.6194 type:complete len:546 (+) TRINITY_DN103154_c0_g1:883-2520(+)	1	0.00966247	71.896	WK(1)ETMVSWEER	2	3.0525	1
TRINITY_DN103176_c1_g1_m.6244	294	K	TRINITY_DN103176_c1_g1|g.6244 ORF TRINITY_DN103176_c1_g1|g.6244 TRINITY_DN103176_c1_g1_m.6244 type:complete len:397 (+) TRINITY_DN103176_c1_g1:337-1527(+)	1	0.000607862	69.716	VLQESSVK(1)K	2	2.5053	1
TRINITY_DN103181_c0_g1_m.6251	564	K	TRINITY_DN103181_c0_g1|g.6251 ORF TRINITY_DN103181_c0_g1|g.6251 TRINITY_DN103181_c0_g1_m.6251 type:complete len:751 (+) TRINITY_DN103181_c0_g1:3953-6205(+)	1	0.0156476	69.716	LIPDK(1)ANLGFR	2	-2.433	1
TRINITY_DN103181_c0_g1_m.6251	327	K	TRINITY_DN103181_c0_g1|g.6251 ORF TRINITY_DN103181_c0_g1|g.6251 TRINITY_DN103181_c0_g1_m.6251 type:complete len:751 (+) TRINITY_DN103181_c0_g1:3953-6205(+)	1	4.78574e-05	75.5	DILEAHK(1)GPFTGQGHK	3	-0.33887	1
TRINITY_DN103181_c0_g1_m.6251	11	K	TRINITY_DN103181_c0_g1|g.6251 ORF TRINITY_DN103181_c0_g1|g.6251 TRINITY_DN103181_c0_g1_m.6251 type:complete len:751 (+) TRINITY_DN103181_c0_g1:3953-6205(+)	1	2.88867e-05	95.138	SPEPEVK(1)IVVDR	2	2.0929	1
TRINITY_DN103181_c0_g1_m.6251	320	K	TRINITY_DN103181_c0_g1|g.6251 ORF TRINITY_DN103181_c0_g1|g.6251 TRINITY_DN103181_c0_g1_m.6251 type:complete len:751 (+) TRINITY_DN103181_c0_g1:3953-6205(+)	1	1.07634e-09	176.58	TNWAIGHGLK(1)DILEAHK	2	0.876	2
TRINITY_DN103181_c0_g1_m.6251	707	K	TRINITY_DN103181_c0_g1|g.6251 ORF TRINITY_DN103181_c0_g1|g.6251 TRINITY_DN103181_c0_g1_m.6251 type:complete len:751 (+) TRINITY_DN103181_c0_g1:3953-6205(+)	1	0.000750189	102.55	LK(1)VAPATQPR	2	-1.1525	1
TRINITY_DN103181_c0_g1_m.6251	20	K	TRINITY_DN103181_c0_g1|g.6251 ORF TRINITY_DN103181_c0_g1|g.6251 TRINITY_DN103181_c0_g1_m.6251 type:complete len:751 (+) TRINITY_DN103181_c0_g1:3953-6205(+)	1	7.61775e-07	138.71	NPIK(1)TSFEEWAR	2	-1.0502	1
TRINITY_DN103181_c0_g1_m.6252	694	K	TRINITY_DN103181_c0_g1|g.6252 ORF TRINITY_DN103181_c0_g1|g.6252 TRINITY_DN103181_c0_g1_m.6252 type:complete len:735 (+) TRINITY_DN103181_c0_g1:6231-8435(+)	0.999944	1.55017e-11	149.02	WK(1)DKPVALSIVQAR	2	-0.78816	2
TRINITY_DN103181_c0_g1_m.6252	545	K	TRINITY_DN103181_c0_g1|g.6252 ORF TRINITY_DN103181_c0_g1|g.6252 TRINITY_DN103181_c0_g1_m.6252 type:complete len:735 (+) TRINITY_DN103181_c0_g1:6231-8435(+)	1	0.0020565	108.3	GSK(1)LMPDK	2	-0.96486	2
TRINITY_DN103181_c0_g1_m.6252	302	K	TRINITY_DN103181_c0_g1|g.6252 ORF TRINITY_DN103181_c0_g1|g.6252 TRINITY_DN103181_c0_g1_m.6252 type:complete len:735 (+) TRINITY_DN103181_c0_g1:6231-8435(+)	1	2.33317e-16	158.86	TNFGIGHSIK(1)DLLEAHIPPGGR	3	1.4949	1
TRINITY_DN103181_c0_g1_m.6252	162	K	TRINITY_DN103181_c0_g1|g.6252 ORF TRINITY_DN103181_c0_g1|g.6252 TRINITY_DN103181_c0_g1_m.6252 type:complete len:735 (+) TRINITY_DN103181_c0_g1:6231-8435(+)	1	0.0133867	60.547	WK(1)PSVSWFK	2	-1.0042	1
TRINITY_DN103181_c0_g1_m.6252	551	K	TRINITY_DN103181_c0_g1|g.6252 ORF TRINITY_DN103181_c0_g1|g.6252 TRINITY_DN103181_c0_g1_m.6252 type:complete len:735 (+) TRINITY_DN103181_c0_g1:6231-8435(+)	1	2.08216e-05	130.99	K(1)DFGYSFPCDGPGR	2	0.28029	2
TRINITY_DN103181_c0_g1_m.6252	169	K	TRINITY_DN103181_c0_g1|g.6252 ORF TRINITY_DN103181_c0_g1|g.6252 TRINITY_DN103181_c0_g1_m.6252 type:complete len:735 (+) TRINITY_DN103181_c0_g1:6231-8435(+)	1	4.20801e-12	202.72	WKPSVSWFK(1)NAESR	3	0.18686	1
TRINITY_DN103194_c1_g1_m.6280	560	K	TRINITY_DN103194_c1_g1|g.6280 ORF TRINITY_DN103194_c1_g1|g.6280 TRINITY_DN103194_c1_g1_m.6280 type:complete len:715 (+) TRINITY_DN103194_c1_g1:193-2337(+)	1	0.000247749	65.173	LK(1)LYEPYEFHVINSDK	2	-1.3614	2
TRINITY_DN103194_c1_g1_m.6280	574	K	TRINITY_DN103194_c1_g1|g.6280 ORF TRINITY_DN103194_c1_g1|g.6280 TRINITY_DN103194_c1_g1_m.6280 type:complete len:715 (+) TRINITY_DN103194_c1_g1:193-2337(+)	1	0.000995677	54.556	LYEPYEFHVINSDK(1)TTR	3	-1.0621	1
TRINITY_DN103199_c1_g1_m.6297	221	K	TRINITY_DN103199_c1_g1|g.6297 ORF TRINITY_DN103199_c1_g1|g.6297 TRINITY_DN103199_c1_g1_m.6297 type:complete len:313 (+) TRINITY_DN103199_c1_g1:140-1078(+)	1	1.96784e-22	155.75	FK(1)AGSLEPAHHHTFGHDVLVMK	3	-1.3549	2
TRINITY_DN103199_c1_g1_m.6297	270	K	TRINITY_DN103199_c1_g1|g.6297 ORF TRINITY_DN103199_c1_g1|g.6297 TRINITY_DN103199_c1_g1_m.6297 type:complete len:313 (+) TRINITY_DN103199_c1_g1:140-1078(+)	1	2.25381e-10	101.8	NESYELVEGDYLFTPAGDK(1)HR	3	-1.1112	1
TRINITY_DN103199_c1_g1_m.6297	31	K	TRINITY_DN103199_c1_g1|g.6297 ORF TRINITY_DN103199_c1_g1|g.6297 TRINITY_DN103199_c1_g1_m.6297 type:complete len:313 (+) TRINITY_DN103199_c1_g1:140-1078(+)	1	4.85376e-10	123.92	IFTGADSFGCNLK(1)DALVSHLR	3	1.5341	1
TRINITY_DN103200_c0_g1_m.6298	442	K	TRINITY_DN103200_c0_g1|g.6298 ORF TRINITY_DN103200_c0_g1|g.6298 TRINITY_DN103200_c0_g1_m.6298 type:complete len:509 (+) TRINITY_DN103200_c0_g1:475-2001(+)	1	0.0318526	66.664	SDTNVYEGK(1)TGK	2	0.77439	1
TRINITY_DN103202_c1_g1_m.6305	53	K	TRINITY_DN103202_c1_g1|g.6305 ORF TRINITY_DN103202_c1_g1|g.6305 TRINITY_DN103202_c1_g1_m.6305 type:complete len:343 (+) TRINITY_DN103202_c1_g1:168-1196(+)	1	0.000533738	94.804	SDVVDHYK(1)QK	2	-0.89839	1
TRINITY_DN103239_c0_g1_m.6403	281	K	TRINITY_DN103239_c0_g1|g.6403 ORF TRINITY_DN103239_c0_g1|g.6403 TRINITY_DN103239_c0_g1_m.6403 type:complete len:917 (+) TRINITY_DN103239_c0_g1:39-2789(+)	1	0.000475965	85.821	PILGGSK(1)QFPYPR	2	1.9588	1
TRINITY_DN103239_c0_g1_m.6403	447	K	TRINITY_DN103239_c0_g1|g.6403 ORF TRINITY_DN103239_c0_g1|g.6403 TRINITY_DN103239_c0_g1_m.6403 type:complete len:917 (+) TRINITY_DN103239_c0_g1:39-2789(+)	1	0.00231757	78.816	LDPK(1)IYGPAK	2	-1.1384	1
TRINITY_DN103239_c0_g1_m.6403	476	K	TRINITY_DN103239_c0_g1|g.6403 ORF TRINITY_DN103239_c0_g1|g.6403 TRINITY_DN103239_c0_g1_m.6403 type:complete len:917 (+) TRINITY_DN103239_c0_g1:39-2789(+)	1	4.71562e-07	135.28	GYMTVEQALK(1)EK	2	2.0898	1
TRINITY_DN103239_c0_g1_m.6403	328	K	TRINITY_DN103239_c0_g1|g.6403 ORF TRINITY_DN103239_c0_g1|g.6403 TRINITY_DN103239_c0_g1_m.6403 type:complete len:917 (+) TRINITY_DN103239_c0_g1:39-2789(+)	1	0.0017697	92.732	QAQFSAK(1)TLR	2	-2.014	1
TRINITY_DN103239_c0_g1_m.6403	230	K	TRINITY_DN103239_c0_g1|g.6403 ORF TRINITY_DN103239_c0_g1|g.6403 TRINITY_DN103239_c0_g1_m.6403 type:complete len:917 (+) TRINITY_DN103239_c0_g1:39-2789(+)	1	7.27973e-10	117.21	SYLPSDTPAGLK(1)SYR	2	-0.46391	1
TRINITY_DN103239_c0_g1_m.6403	884	K	TRINITY_DN103239_c0_g1|g.6403 ORF TRINITY_DN103239_c0_g1|g.6403 TRINITY_DN103239_c0_g1_m.6403 type:complete len:917 (+) TRINITY_DN103239_c0_g1:39-2789(+)	1	0.0125395	45.489	NLDAGLK(1)NR	2	-0.83844	1
TRINITY_DN103239_c0_g1_m.6403	868	K	TRINITY_DN103239_c0_g1|g.6403 ORF TRINITY_DN103239_c0_g1|g.6403 TRINITY_DN103239_c0_g1_m.6403 type:complete len:917 (+) TRINITY_DN103239_c0_g1:39-2789(+)	1	0.00011127	65.879	LK(1)EIEGIIDGR	2	-1.158	1
TRINITY_DN103240_c4_g1_m.6409	201	K	TRINITY_DN103240_c4_g1|g.6409 ORF TRINITY_DN103240_c4_g1|g.6409 TRINITY_DN103240_c4_g1_m.6409 type:complete len:239 (+) TRINITY_DN103240_c4_g1:137-853(+)	1	0.0113504	51.531	STSAHFIK(1)DK	2	1.7086	1
TRINITY_DN103258_c0_g1_m.6432	187	K	TRINITY_DN103258_c0_g1|g.6432 ORF TRINITY_DN103258_c0_g1|g.6432 TRINITY_DN103258_c0_g1_m.6432 type:complete len:576 (+) TRINITY_DN103258_c0_g1:400-2127(+)	1	0.0113504	51.531	AK(1)DAIVTWIK	2	-1.4812	1
TRINITY_DN103260_c1_g2_m.6433	893	K	TRINITY_DN103260_c1_g2|g.6433 ORF TRINITY_DN103260_c1_g2|g.6433 TRINITY_DN103260_c1_g2_m.6433 type:complete len:1058 (+) TRINITY_DN103260_c1_g2:123-3296(+)	1	0.0121927	51.864	NLNK(1)ENLDIK	2	-12.857	1
TRINITY_DN103268_c0_g3_m.6441	92	K	TRINITY_DN103268_c0_g3|g.6441 ORF TRINITY_DN103268_c0_g3|g.6441 TRINITY_DN103268_c0_g3_m.6441 type:complete len:129 (+) TRINITY_DN103268_c0_g3:162-548(+)	1	7.31218e-34	215.93	AAQTGQISEK(1)VSEER	2	-2.0742	1
TRINITY_DN103270_c0_g1_m.6447	1574	K	TRINITY_DN103270_c0_g1|g.6447 ORF TRINITY_DN103270_c0_g1|g.6447 TRINITY_DN103270_c0_g1_m.6447 type:complete len:1627 (+) TRINITY_DN103270_c0_g1:220-5100(+)	1	2.29127e-05	101.64	SLIEAHVEK(1)TGSK	2	-1.8529	1
TRINITY_DN103270_c0_g1_m.6447	245	K	TRINITY_DN103270_c0_g1|g.6447 ORF TRINITY_DN103270_c0_g1|g.6447 TRINITY_DN103270_c0_g1_m.6447 type:complete len:1627 (+) TRINITY_DN103270_c0_g1:220-5100(+)	1	0.00487162	62.454	VPK(1)EESVDDIER	2	-1.5723	1
TRINITY_DN103270_c0_g1_m.6447	1075	K	TRINITY_DN103270_c0_g1|g.6447 ORF TRINITY_DN103270_c0_g1|g.6447 TRINITY_DN103270_c0_g1_m.6447 type:complete len:1627 (+) TRINITY_DN103270_c0_g1:220-5100(+)	1	0.00284727	66.619	IAQGAK(1)PGEGGQLPGK	2	-1.2595	1
TRINITY_DN103270_c0_g1_m.6447	198	K	TRINITY_DN103270_c0_g1|g.6447 ORF TRINITY_DN103270_c0_g1|g.6447 TRINITY_DN103270_c0_g1_m.6447 type:complete len:1627 (+) TRINITY_DN103270_c0_g1:220-5100(+)	1	0.00610583	62.88	AAK(1)TAIMR	2	-1.5022	1
TRINITY_DN103270_c0_g1_m.6447	1551	K	TRINITY_DN103270_c0_g1|g.6447 ORF TRINITY_DN103270_c0_g1|g.6447 TRINITY_DN103270_c0_g1_m.6447 type:complete len:1627 (+) TRINITY_DN103270_c0_g1:220-5100(+)	1	0.0056035	72.355	EIVK(1)IQR	2	0.61186	1
TRINITY_DN103270_c0_g1_m.6447	1547	K	TRINITY_DN103270_c0_g1|g.6447 ORF TRINITY_DN103270_c0_g1|g.6447 TRINITY_DN103270_c0_g1_m.6447 type:complete len:1627 (+) TRINITY_DN103270_c0_g1:220-5100(+)	1	0.0568691	49.325	VNK(1)EIVK	2	-0.54285	1
TRINITY_DN103270_c0_g1_m.6447	821	K	TRINITY_DN103270_c0_g1|g.6447 ORF TRINITY_DN103270_c0_g1|g.6447 TRINITY_DN103270_c0_g1_m.6447 type:complete len:1627 (+) TRINITY_DN103270_c0_g1:220-5100(+)	1	0.0695982	42.075	AVK(1)SGLLK	2	-0.33794	1
TRINITY_DN103270_c0_g1_m.6447	1372	K	TRINITY_DN103270_c0_g1|g.6447 ORF TRINITY_DN103270_c0_g1|g.6447 TRINITY_DN103270_c0_g1_m.6447 type:complete len:1627 (+) TRINITY_DN103270_c0_g1:220-5100(+)	1	1.62302e-07	119.43	EVTK(1)AVEIHNVDR	2	-1.8139	2
TRINITY_DN103270_c0_g1_m.6447	921	K	TRINITY_DN103270_c0_g1|g.6447 ORF TRINITY_DN103270_c0_g1|g.6447 TRINITY_DN103270_c0_g1_m.6447 type:complete len:1627 (+) TRINITY_DN103270_c0_g1:220-5100(+)	1	0.00466948	105.22	LLHK(1)AVR	2	1.4409	1
TRINITY_DN103270_c0_g1_m.6447	963	K	TRINITY_DN103270_c0_g1|g.6447 ORF TRINITY_DN103270_c0_g1|g.6447 TRINITY_DN103270_c0_g1_m.6447 type:complete len:1627 (+) TRINITY_DN103270_c0_g1:220-5100(+)	1	6.59433e-05	97.084	RPPIPVGK(1)VEPASSIVQR	3	-2.4917	1
TRINITY_DN103272_c0_g1_m.6449	268	K	TRINITY_DN103272_c0_g1|g.6449 ORF TRINITY_DN103272_c0_g1|g.6449 TRINITY_DN103272_c0_g1_m.6449 type:complete len:392 (+) TRINITY_DN103272_c0_g1:371-1546(+)	1	0.000118132	102.55	LLK(1)ETLQQTR	2	-3.9422	1
TRINITY_DN103287_c0_g1_m.6485	130	K	TRINITY_DN103287_c0_g1|g.6485 ORF TRINITY_DN103287_c0_g1|g.6485 TRINITY_DN103287_c0_g1_m.6485 type:complete len:1186 (+) TRINITY_DN103287_c0_g1:245-3802(+)	1	0.0387441	52.837	YVK(1)EWEEVITR	2	0.53166	1
TRINITY_DN103287_c0_g1_m.6485	899	K	TRINITY_DN103287_c0_g1|g.6485 ORF TRINITY_DN103287_c0_g1|g.6485 TRINITY_DN103287_c0_g1_m.6485 type:complete len:1186 (+) TRINITY_DN103287_c0_g1:245-3802(+)	1	7.5301e-05	82.437	LK(1)EYVLEELNVK	2	1.7905	1
TRINITY_DN103287_c0_g1_m.6485	458	K	TRINITY_DN103287_c0_g1|g.6485 ORF TRINITY_DN103287_c0_g1|g.6485 TRINITY_DN103287_c0_g1_m.6485 type:complete len:1186 (+) TRINITY_DN103287_c0_g1:245-3802(+)	1	0.0062987	60.547	IK(1)DQLLECNK	2	-1.8559	1
TRINITY_DN103289_c0_g1_m.6491	468	K	TRINITY_DN103289_c0_g1|g.6491 ORF TRINITY_DN103289_c0_g1|g.6491 TRINITY_DN103289_c0_g1_m.6491 type:5prime_partial len:622 (+) TRINITY_DN103289_c0_g1:2-1867(+)	0.999999	0.00696977	64.906	DKEATAK(1)AIK	2	0.64929	1
TRINITY_DN103291_c0_g1_m.6496	106	K	TRINITY_DN103291_c0_g1|g.6496 ORF TRINITY_DN103291_c0_g1|g.6496 TRINITY_DN103291_c0_g1_m.6496 type:complete len:139 (+) TRINITY_DN103291_c0_g1:138-554(+)	1	0.0159823	51.864	IDSEGK(1)AR	2	-0.76249	1
TRINITY_DN103291_c0_g1_m.6496	47	K	TRINITY_DN103291_c0_g1|g.6496 ORF TRINITY_DN103291_c0_g1|g.6496 TRINITY_DN103291_c0_g1_m.6496 type:complete len:139 (+) TRINITY_DN103291_c0_g1:138-554(+)	1	0.000899308	71.896	GLHEAAK(1)AVEK	2	1.4945	2
TRINITY_DN103292_c3_g13_m.6502	60	K	TRINITY_DN103292_c3_g13|g.6502 ORF TRINITY_DN103292_c3_g13|g.6502 TRINITY_DN103292_c3_g13_m.6502 type:3prime_partial len:102 (+) TRINITY_DN103292_c3_g13:235-537(+)	1	0.0017166	56.202	NILLLDSEGK(1)R	2	-0.39935	1
TRINITY_DN103304_c0_g2_m.6519	152	K	TRINITY_DN103304_c0_g2|g.6519 ORF TRINITY_DN103304_c0_g2|g.6519 TRINITY_DN103304_c0_g2_m.6519 type:complete len:228 (+) TRINITY_DN103304_c0_g2:110-793(+)	1	0.00271995	58.426	VLLVGTPK(1)K	2	-0.93606	1
TRINITY_DN103304_c0_g2_m.6519	144	K	TRINITY_DN103304_c0_g2|g.6519 ORF TRINITY_DN103304_c0_g2|g.6519 TRINITY_DN103304_c0_g2_m.6519 type:complete len:228 (+) TRINITY_DN103304_c0_g2:110-793(+)	1	3.03556e-05	105.94	VLLSK(1)VLLVGTPK	2	-0.41869	1
TRINITY_DN103304_c0_g2_m.6519	132	K	TRINITY_DN103304_c0_g2|g.6519 ORF TRINITY_DN103304_c0_g2|g.6519 TRINITY_DN103304_c0_g2_m.6519 type:complete len:228 (+) TRINITY_DN103304_c0_g2:110-793(+)	1	0.0293371	63.397	LK(1)GANVNDK	2	3.0315	1
TRINITY_DN103307_c0_g15_m.6526	28	K	TRINITY_DN103307_c0_g15|g.6526 ORF TRINITY_DN103307_c0_g15|g.6526 TRINITY_DN103307_c0_g15_m.6526 type:5prime_partial len:607 (+) TRINITY_DN103307_c0_g15:1-1821(+)	1	2.90142e-06	116.36	LIGEAAK(1)NQAAVNPER	2	-3.2398	1
TRINITY_DN103307_c0_g15_m.6526	132	K	TRINITY_DN103307_c0_g15|g.6526 ORF TRINITY_DN103307_c0_g15|g.6526 TRINITY_DN103307_c0_g15_m.6526 type:5prime_partial len:607 (+) TRINITY_DN103307_c0_g15:1-1821(+)	1	0.00581615	71.219	QATK(1)DAGIIAGLNVAR	2	-1.9451	1
TRINITY_DN103307_c0_g15_m.6526	43	K	TRINITY_DN103307_c0_g15|g.6526 ORF TRINITY_DN103307_c0_g15|g.6526 TRINITY_DN103307_c0_g15_m.6526 type:5prime_partial len:607 (+) TRINITY_DN103307_c0_g15:1-1821(+)	1	0.0260599	73.637	TIFDVK(1)R	2	-1.9876	1
TRINITY_DN103307_c0_g15_m.6526	570	K	TRINITY_DN103307_c0_g15|g.6526 ORF TRINITY_DN103307_c0_g15|g.6526 TRINITY_DN103307_c0_g15_m.6526 type:5prime_partial len:607 (+) TRINITY_DN103307_c0_g15:1-1821(+)	1	0.0702722	56.08	LK(1)EVEAVCNPVISK	2	-2.3864	1
TRINITY_DN103307_c0_g15_m.6526	534	K	TRINITY_DN103307_c0_g15|g.6526 ORF TRINITY_DN103307_c0_g15|g.6526 TRINITY_DN103307_c0_g15_m.6526 type:5prime_partial len:607 (+) TRINITY_DN103307_c0_g15:1-1821(+)	1	0.000720715	103.76	LADK(1)IENDEKEK	2	-1.9826	1
TRINITY_DN103307_c0_g15_m.6526	540	K	TRINITY_DN103307_c0_g15|g.6526 ORF TRINITY_DN103307_c0_g15|g.6526 TRINITY_DN103307_c0_g15_m.6526 type:5prime_partial len:607 (+) TRINITY_DN103307_c0_g15:1-1821(+)	1	7.48368e-10	157.74	IENDEK(1)EK	2	-1.1875	2
TRINITY_DN103337_c1_g3_m.6595	93	K	TRINITY_DN103337_c1_g3|g.6595 ORF TRINITY_DN103337_c1_g3|g.6595 TRINITY_DN103337_c1_g3_m.6595 type:complete len:284 (+) TRINITY_DN103337_c1_g3:145-996(+)	1	3.0459e-12	142.71	NHAQK(1)IANLAPGYR	2	-1.9294	1
TRINITY_DN103348_c8_g2_m.6625	652	K	TRINITY_DN103348_c8_g2|g.6625 ORF TRINITY_DN103348_c8_g2|g.6625 TRINITY_DN103348_c8_g2_m.6625 type:complete len:843 (+) TRINITY_DN103348_c8_g2:241-2769(+)	1	0.0100726	56.014	GIALHK(1)MIR	2	-2.2948	1
TRINITY_DN103352_c3_g6_m.6639	245	K	TRINITY_DN103352_c3_g6|g.6639 ORF TRINITY_DN103352_c3_g6|g.6639 TRINITY_DN103352_c3_g6_m.6639 type:complete len:476 (+) TRINITY_DN103352_c3_g6:269-1696(+)	1	0.00210664	82.437	EVTPAEAMADGPK(1)R	2	-2.4032	1
TRINITY_DN103413_c0_g1_m.6788	483	K	TRINITY_DN103413_c0_g1|g.6788 ORF TRINITY_DN103413_c0_g1|g.6788 TRINITY_DN103413_c0_g1_m.6788 type:complete len:573 (+) TRINITY_DN103413_c0_g1:172-1890(+)	1	0.00701192	65.12	ANTK(1)ALAENEGEGLAK	2	-2.6869	1
TRINITY_DN103413_c0_g1_m.6788	366	K	TRINITY_DN103413_c0_g1|g.6788 ORF TRINITY_DN103413_c0_g1|g.6788 TRINITY_DN103413_c0_g1_m.6788 type:complete len:573 (+) TRINITY_DN103413_c0_g1:172-1890(+)	1	0.000371795	81.409	APFTK(1)GLGLESVNVTTQR	2	-2.8829	1
TRINITY_DN103413_c0_g1_m.6788	151	K	TRINITY_DN103413_c0_g1|g.6788 ORF TRINITY_DN103413_c0_g1|g.6788 TRINITY_DN103413_c0_g1_m.6788 type:complete len:573 (+) TRINITY_DN103413_c0_g1:172-1890(+)	1	2.38308e-05	48.037	MHELQSEDHLK(1)SMGLQVLNHSYDR	3	-2.1019	1
TRINITY_DN103423_c0_g8_m.6801	288	K	TRINITY_DN103423_c0_g8|g.6801 ORF TRINITY_DN103423_c0_g8|g.6801 TRINITY_DN103423_c0_g8_m.6801 type:5prime_partial len:400 (+) TRINITY_DN103423_c0_g8:1-1200(+)	1	0.0182971	43.306	LK(1)QPVLDLEFER	2	-4.0148	1
TRINITY_DN103443_c0_g2_m.6843	590	K	TRINITY_DN103443_c0_g2|g.6843 ORF TRINITY_DN103443_c0_g2|g.6843 TRINITY_DN103443_c0_g2_m.6843 type:complete len:983 (+) TRINITY_DN103443_c0_g2:320-3268(+)	1	1.46405e-05	80.815	VVK(1)ETAENVDEAVR	2	-3.3272	1
TRINITY_DN103452_c0_g1_m.6866	120	K	TRINITY_DN103452_c0_g1|g.6866 ORF TRINITY_DN103452_c0_g1|g.6866 TRINITY_DN103452_c0_g1_m.6866 type:complete len:1130 (+) TRINITY_DN103452_c0_g1:203-3592(+)	1	0.000543845	95.311	LEK(1)HTGPVR	2	-0.21367	1
TRINITY_DN103453_c0_g2_m.6868	202	K	TRINITY_DN103453_c0_g2|g.6868 ORF TRINITY_DN103453_c0_g2|g.6868 TRINITY_DN103453_c0_g2_m.6868 type:complete len:674 (+) TRINITY_DN103453_c0_g2:279-2300(+)	1	0.00139523	60	AFSSYQDEVLVK(1)R	2	-3.1953	1
TRINITY_DN103460_c0_g1_m.6877	59	K	TRINITY_DN103460_c0_g1|g.6877 ORF TRINITY_DN103460_c0_g1|g.6877 TRINITY_DN103460_c0_g1_m.6877 type:complete len:1623 (+) TRINITY_DN103460_c0_g1:226-5094(+)	1	0.00170855	67.507	TTK(1)DYSVQR	2	0.36224	1
TRINITY_DN103466_c0_g1_m.6888	750	K	TRINITY_DN103466_c0_g1|g.6888 ORF TRINITY_DN103466_c0_g1|g.6888 TRINITY_DN103466_c0_g1_m.6888 type:complete len:1117 (+) TRINITY_DN103466_c0_g1:268-3618(+)	1	0.0532304	40.533	LAVEK(1)GLASGR	2	-3.5118	1
TRINITY_DN103485_c0_g2_m.6939	637	K	TRINITY_DN103485_c0_g2|g.6939 ORF TRINITY_DN103485_c0_g2|g.6939 TRINITY_DN103485_c0_g2_m.6939 type:5prime_partial len:751 (+) TRINITY_DN103485_c0_g2:1-2253(+)	1	0.000394957	65.879	EETHK(1)FESHYIDR	3	-0.0011174	1
TRINITY_DN103485_c0_g2_m.6939	695	K	TRINITY_DN103485_c0_g2|g.6939 ORF TRINITY_DN103485_c0_g2|g.6939 TRINITY_DN103485_c0_g2_m.6939 type:5prime_partial len:751 (+) TRINITY_DN103485_c0_g2:1-2253(+)	1	2.36003e-06	113.48	EK(1)GLPVALVEYEGEQHGFR	3	-0.44682	1
TRINITY_DN103493_c0_g1_m.6956	181	K	TRINITY_DN103493_c0_g1|g.6956 ORF TRINITY_DN103493_c0_g1|g.6956 TRINITY_DN103493_c0_g1_m.6956 type:5prime_partial len:1002 (+) TRINITY_DN103493_c0_g1:1-3006(+)	1	1.01621e-12	82.87	IPSQHPPPDEIPASTSLIK(1)AIR	3	-1.696	1
TRINITY_DN103493_c0_g1_m.6956	872	K	TRINITY_DN103493_c0_g1|g.6956 ORF TRINITY_DN103493_c0_g1|g.6956 TRINITY_DN103493_c0_g1_m.6956 type:5prime_partial len:1002 (+) TRINITY_DN103493_c0_g1:1-3006(+)	1	0.00155768	81.642	LQMK(1)DVAVR	2	-0.36966	2
TRINITY_DN103493_c0_g1_m.6956	267	K	TRINITY_DN103493_c0_g1|g.6956 ORF TRINITY_DN103493_c0_g1|g.6956 TRINITY_DN103493_c0_g1_m.6956 type:5prime_partial len:1002 (+) TRINITY_DN103493_c0_g1:1-3006(+)	1	5.41439e-06	85.813	DLVEQAGK(1)LDPVIGR	2	-0.68244	1
TRINITY_DN103493_c0_g1_m.6956	341	K	TRINITY_DN103493_c0_g1|g.6956 ORF TRINITY_DN103493_c0_g1|g.6956 TRINITY_DN103493_c0_g1_m.6956 type:5prime_partial len:1002 (+) TRINITY_DN103493_c0_g1:1-3006(+)	1	0.00746689	48.701	LIALDMGALVAGAK(1)YR	2	2.8778	1
TRINITY_DN103493_c0_g1_m.6956	191	K	TRINITY_DN103493_c0_g1|g.6956 ORF TRINITY_DN103493_c0_g1|g.6956 TRINITY_DN103493_c0_g1_m.6956 type:5prime_partial len:1002 (+) TRINITY_DN103493_c0_g1:1-3006(+)	1	0.0150607	69.905	AQSSQK(1)QR	2	0.37104	1
TRINITY_DN103493_c0_g1_m.6956	545	K	TRINITY_DN103493_c0_g1|g.6956 ORF TRINITY_DN103493_c0_g1|g.6956 TRINITY_DN103493_c0_g1_m.6956 type:5prime_partial len:1002 (+) TRINITY_DN103493_c0_g1:1-3006(+)	1	0.000511492	91.783	DK(1)LQPLVMR	2	-2.3929	1
TRINITY_DN103493_c0_g1_m.6956	416	K	TRINITY_DN103493_c0_g1|g.6956 ORF TRINITY_DN103493_c0_g1|g.6956 TRINITY_DN103493_c0_g1_m.6956 type:5prime_partial len:1002 (+) TRINITY_DN103493_c0_g1:1-3006(+)	1	6.91007e-06	115.41	YVEK(1)DAAFER	2	0.43973	1
TRINITY_DN103493_c0_g1_m.6956	255	K	TRINITY_DN103493_c0_g1|g.6956 ORF TRINITY_DN103493_c0_g1|g.6956 TRINITY_DN103493_c0_g1_m.6956 type:5prime_partial len:1002 (+) TRINITY_DN103493_c0_g1:1-3006(+)	1	0.000107633	85.742	VESASGDTNFQALK(1)TYGR	2	-2.3927	1
TRINITY_DN103493_c0_g1_m.6956	355	K	TRINITY_DN103493_c0_g1|g.6956 ORF TRINITY_DN103493_c0_g1|g.6956 TRINITY_DN103493_c0_g1_m.6956 type:5prime_partial len:1002 (+) TRINITY_DN103493_c0_g1:1-3006(+)	1	0.0211206	61.194	AVLK(1)EVEDAAGK	2	-0.92421	1
TRINITY_DN103493_c0_g1_m.6956	647	K	TRINITY_DN103493_c0_g1|g.6956 ORF TRINITY_DN103493_c0_g1|g.6956 TRINITY_DN103493_c0_g1_m.6956 type:5prime_partial len:1002 (+) TRINITY_DN103493_c0_g1:1-3006(+)	1	0.00847193	58.426	LGQNEK(1)ER	2	-0.75132	1
TRINITY_DN103507_c0_g4_m.7000	173	K	TRINITY_DN103507_c0_g4|g.7000 ORF TRINITY_DN103507_c0_g4|g.7000 TRINITY_DN103507_c0_g4_m.7000 type:complete len:204 (+) TRINITY_DN103507_c0_g4:193-804(+)	1	0.000862149	54.27	FDWDQTHK(1)AWVYR	2	2.8135	2
TRINITY_DN103527_c1_g2_m.7055	35	K	TRINITY_DN103527_c1_g2|g.7055 ORF TRINITY_DN103527_c1_g2|g.7055 TRINITY_DN103527_c1_g2_m.7055 type:complete len:278 (+) TRINITY_DN103527_c1_g2:704-1537(+)	1	0.00612495	92.428	RAPIDSK(1)ILK	2	0.65925	1
TRINITY_DN103527_c1_g2_m.7055	266	K	TRINITY_DN103527_c1_g2|g.7055 ORF TRINITY_DN103527_c1_g2|g.7055 TRINITY_DN103527_c1_g2_m.7055 type:complete len:278 (+) TRINITY_DN103527_c1_g2:704-1537(+)	1	0.0520961	42.835	AK(1)MEEEK	2	-0.51766	1
TRINITY_DN103538_c1_g1_m.7071	131	K	TRINITY_DN103538_c1_g1|g.7071 ORF TRINITY_DN103538_c1_g1|g.7071 TRINITY_DN103538_c1_g1_m.7071 type:complete len:281 (+) TRINITY_DN103538_c1_g1:63-905(+)	1	0.00675053	52.591	SEVQK(1)LNAMR	2	0.74441	1
TRINITY_DN103538_c1_g1_m.7071	77	K	TRINITY_DN103538_c1_g1|g.7071 ORF TRINITY_DN103538_c1_g1|g.7071 TRINITY_DN103538_c1_g1_m.7071 type:complete len:281 (+) TRINITY_DN103538_c1_g1:63-905(+)	1	2.0368e-26	227.95	MAFQQELVAAK(1)EEIHR	3	-1.7966	3
TRINITY_DN103538_c1_g1_m.7071	144	K	TRINITY_DN103538_c1_g1|g.7071 ORF TRINITY_DN103538_c1_g1|g.7071 TRINITY_DN103538_c1_g1_m.7071 type:complete len:281 (+) TRINITY_DN103538_c1_g1:63-905(+)	1	0.00848094	54.556	HDLNEQVK(1)VLTQDLK	2	-2.1799	1
TRINITY_DN103538_c1_g1_m.7071	100	K	TRINITY_DN103538_c1_g1|g.7071 ORF TRINITY_DN103538_c1_g1|g.7071 TRINITY_DN103538_c1_g1_m.7071 type:complete len:281 (+) TRINITY_DN103538_c1_g1:63-905(+)	1	1.71177e-06	120.65	DAHSSK(1)LVEK	2	0.68282	1
TRINITY_DN103541_c0_g1_m.7077	479	K	TRINITY_DN103541_c0_g1|g.7077 ORF TRINITY_DN103541_c0_g1|g.7077 TRINITY_DN103541_c0_g1_m.7077 type:complete len:554 (+) TRINITY_DN103541_c0_g1:221-1882(+)	1	3.29131e-06	106	GGTVQK(1)IIEEK	2	-3.1996	1
TRINITY_DN103563_c1_g3_m.7122	491	K	TRINITY_DN103563_c1_g3|g.7122 ORF TRINITY_DN103563_c1_g3|g.7122 TRINITY_DN103563_c1_g3_m.7122 type:complete len:531 (+) TRINITY_DN103563_c1_g3:138-1730(+)	1	0.000223352	76.572	EVENSVEEFK(1)R	2	-1.1328	1
TRINITY_DN103574_c1_g1_m.7152	652	K	TRINITY_DN103574_c1_g1|g.7152 ORF TRINITY_DN103574_c1_g1|g.7152 TRINITY_DN103574_c1_g1_m.7152 type:5prime_partial len:669 (+) TRINITY_DN103574_c1_g1:2-2008(+)	1	0.0172897	50.09	ELENK(1)LEQMNTR	2	3.3717	1
TRINITY_DN103574_c1_g1_m.7152	518	K	TRINITY_DN103574_c1_g1|g.7152 ORF TRINITY_DN103574_c1_g1|g.7152 TRINITY_DN103574_c1_g1_m.7152 type:5prime_partial len:669 (+) TRINITY_DN103574_c1_g1:2-2008(+)	1	0.00910411	64.064	EYDDTSSK(1)LSK	2	-0.93665	1
TRINITY_DN103574_c1_g1_m.7152	208	K	TRINITY_DN103574_c1_g1|g.7152 ORF TRINITY_DN103574_c1_g1|g.7152 TRINITY_DN103574_c1_g1_m.7152 type:5prime_partial len:669 (+) TRINITY_DN103574_c1_g1:2-2008(+)	1	0.0016538	96.957	IETFK(1)EGLIIR	2	-1.5027	1
TRINITY_DN103574_c1_g1_m.7152	576	K	TRINITY_DN103574_c1_g1|g.7152 ORF TRINITY_DN103574_c1_g1|g.7152 TRINITY_DN103574_c1_g1_m.7152 type:5prime_partial len:669 (+) TRINITY_DN103574_c1_g1:2-2008(+)	1	0.000803802	70.195	QASQDEGYSK(1)TR	2	-1.5824	1
TRINITY_DN103585_c0_g1_m.7179	476	K	TRINITY_DN103585_c0_g1|g.7179 ORF TRINITY_DN103585_c0_g1|g.7179 TRINITY_DN103585_c0_g1_m.7179 type:complete len:644 (+) TRINITY_DN103585_c0_g1:260-2191(+)	1	0.00202001	70.638	SFK(1)SGQAPILVATDVAAR	2	0.45855	1
TRINITY_DN103612_c1_g1_m.7236	180	K	TRINITY_DN103612_c1_g1|g.7236 ORF TRINITY_DN103612_c1_g1|g.7236 TRINITY_DN103612_c1_g1_m.7236 type:complete len:410 (+) TRINITY_DN103612_c1_g1:326-1555(+)	1	0.00082693	50.116	ILK(1)QVGAYADAEK	2	0.23619	1
TRINITY_DN103612_c1_g1_m.7236	312	K	TRINITY_DN103612_c1_g1|g.7236 ORF TRINITY_DN103612_c1_g1|g.7236 TRINITY_DN103612_c1_g1_m.7236 type:complete len:410 (+) TRINITY_DN103612_c1_g1:326-1555(+)	1	2.76008e-13	137.4	IINSDEVQSVVK(1)PINK	2	-2.6598	1
TRINITY_DN103612_c1_g1_m.7236	292	K	TRINITY_DN103612_c1_g1|g.7236 ORF TRINITY_DN103612_c1_g1|g.7236 TRINITY_DN103612_c1_g1_m.7236 type:complete len:410 (+) TRINITY_DN103612_c1_g1:326-1555(+)	1	5.9843e-06	123.42	PK(1)MTNADLGR	2	0.18766	2
TRINITY_DN103612_c1_g1_m.7236	248	K	TRINITY_DN103612_c1_g1|g.7236 ORF TRINITY_DN103612_c1_g1|g.7236 TRINITY_DN103612_c1_g1_m.7236 type:complete len:410 (+) TRINITY_DN103612_c1_g1:326-1555(+)	1	9.99864e-12	126.29	LNVLK(1)LAPGGHLGR	2	0.12735	2
TRINITY_DN103612_c1_g1_m.7236	372	K	TRINITY_DN103612_c1_g1|g.7236 ORF TRINITY_DN103612_c1_g1|g.7236 TRINITY_DN103612_c1_g1_m.7236 type:complete len:410 (+) TRINITY_DN103612_c1_g1:326-1555(+)	1	0.000132115	129.28	SSLTK(1)EEAAK	2	1.0275	1
TRINITY_DN103612_c1_g1_m.7236	263	K	TRINITY_DN103612_c1_g1|g.7236 ORF TRINITY_DN103612_c1_g1|g.7236 TRINITY_DN103612_c1_g1_m.7236 type:complete len:410 (+) TRINITY_DN103612_c1_g1:326-1555(+)	1	0.0307264	47.561	FIVWTK(1)SAFEK	2	1.4511	1
TRINITY_DN103612_c1_g1_m.7236	5	K	TRINITY_DN103612_c1_g1|g.7236 ORF TRINITY_DN103612_c1_g1|g.7236 TRINITY_DN103612_c1_g1_m.7236 type:complete len:410 (+) TRINITY_DN103612_c1_g1:326-1555(+)	1	0.0420022	45.489	AASK(1)PITR	2	-0.6008	1
TRINITY_DN103612_c1_g1_m.7239	85	K	TRINITY_DN103612_c1_g1|g.7239 ORF TRINITY_DN103612_c1_g1|g.7239 TRINITY_DN103612_c1_g1_m.7239 type:complete len:112 (+) TRINITY_DN103612_c1_g1:1631-1966(+)	1	6.03787e-19	180.17	NNTEYK(1)LETFSGVYR	2	0.37782	1
TRINITY_DN103612_c1_g1_m.7239	77	K	TRINITY_DN103612_c1_g1|g.7239 ORF TRINITY_DN103612_c1_g1|g.7239 TRINITY_DN103612_c1_g1_m.7239 type:complete len:112 (+) TRINITY_DN103612_c1_g1:1631-1966(+)	1	0.000169966	90.308	IFLDPK(1)ER	2	-1.2767	1
TRINITY_DN103612_c1_g1_m.7239	71	K	TRINITY_DN103612_c1_g1|g.7239 ORF TRINITY_DN103612_c1_g1|g.7239 TRINITY_DN103612_c1_g1_m.7239 type:complete len:112 (+) TRINITY_DN103612_c1_g1:1631-1966(+)	1	0.0153784	46.033	IVK(1)IFLDPK	2	-2.359	1
TRINITY_DN103612_c1_g1_m.7239	10	K	TRINITY_DN103612_c1_g1|g.7239 ORF TRINITY_DN103612_c1_g1|g.7239 TRINITY_DN103612_c1_g1_m.7239 type:complete len:112 (+) TRINITY_DN103612_c1_g1:1631-1966(+)	1	0.000604927	101.64	FSGK(1)DVIIIATR	2	-0.30463	1
TRINITY_DN103612_c1_g1_m.7239	58	K	TRINITY_DN103612_c1_g1|g.7239 ORF TRINITY_DN103612_c1_g1|g.7239 TRINITY_DN103612_c1_g1_m.7239 type:complete len:112 (+) TRINITY_DN103612_c1_g1:1631-1966(+)	1	0.00108824	70.552	TLTAVHDAILEDLVYPAEIVGK(1)R	3	-0.73311	1
TRINITY_DN103639_c0_g1_m.7301	66	K	TRINITY_DN103639_c0_g1|g.7301 ORF TRINITY_DN103639_c0_g1|g.7301 TRINITY_DN103639_c0_g1_m.7301 type:complete len:767 (+) TRINITY_DN103639_c0_g1:168-2468(+)	1	0.0169855	40.861	LTLQEK(1)VGFLGNK	2	-2.2501	1
TRINITY_DN103639_c0_g1_m.7301	55	K	TRINITY_DN103639_c0_g1|g.7301 ORF TRINITY_DN103639_c0_g1|g.7301 TRINITY_DN103639_c0_g1_m.7301 type:complete len:767 (+) TRINITY_DN103639_c0_g1:168-2468(+)	1	0.00471197	84.699	VK(1)DLVGR	2	0.61658	1
TRINITY_DN103667_c1_g3_m.7351	174	K	TRINITY_DN103667_c1_g3|g.7351 ORF TRINITY_DN103667_c1_g3|g.7351 TRINITY_DN103667_c1_g3_m.7351 type:3prime_partial len:326 (+) TRINITY_DN103667_c1_g3:373-1347(+)	1	0.0335584	42.075	VMWDQK(1)TGR	2	1.2382	1
TRINITY_DN103712_c0_g2_m.7439	416	K	TRINITY_DN103712_c0_g2|g.7439 ORF TRINITY_DN103712_c0_g2|g.7439 TRINITY_DN103712_c0_g2_m.7439 type:complete len:846 (+) TRINITY_DN103712_c0_g2:325-2862(+)	1	7.59266e-05	102.55	FK(1)AMVNSNHR	2	-1.0061	1
TRINITY_DN103712_c0_g2_m.7439	751	K	TRINITY_DN103712_c0_g2|g.7439 ORF TRINITY_DN103712_c0_g2|g.7439 TRINITY_DN103712_c0_g2_m.7439 type:complete len:846 (+) TRINITY_DN103712_c0_g2:325-2862(+)	1	1.85548e-05	133.98	FEEAK(1)HFIR	2	0.18126	1
TRINITY_DN103712_c0_g2_m.7439	133	K	TRINITY_DN103712_c0_g2|g.7439 ORF TRINITY_DN103712_c0_g2|g.7439 TRINITY_DN103712_c0_g2_m.7439 type:complete len:846 (+) TRINITY_DN103712_c0_g2:325-2862(+)	1	0.00551779	60.547	EK(1)DAALGNGGLGR	2	0.9081	1
TRINITY_DN103712_c0_g2_m.7439	82	K	TRINITY_DN103712_c0_g2|g.7439 ORF TRINITY_DN103712_c0_g2|g.7439 TRINITY_DN103712_c0_g2_m.7439 type:complete len:846 (+) TRINITY_DN103712_c0_g2:325-2862(+)	1	0.0121265	61.042	WNDTYLHFHK(1)HDPK	3	-1.143	1
TRINITY_DN103721_c0_g1_m.7466	201	K	TRINITY_DN103721_c0_g1|g.7466 ORF TRINITY_DN103721_c0_g1|g.7466 TRINITY_DN103721_c0_g1_m.7466 type:5prime_partial len:510 (+) TRINITY_DN103721_c0_g1:2-1531(+)	1	0.002642	73.891	IAYENAAFIK(1)NVVNNVWK	2	-0.28039	1
TRINITY_DN103721_c0_g1_m.7466	468	K	TRINITY_DN103721_c0_g1|g.7466 ORF TRINITY_DN103721_c0_g1|g.7466 TRINITY_DN103721_c0_g1_m.7466 type:5prime_partial len:510 (+) TRINITY_DN103721_c0_g1:2-1531(+)	1	7.72491e-05	96.957	EYK(1)EGTISILYR	2	1.1283	1
TRINITY_DN103721_c0_g1_m.7466	321	K	TRINITY_DN103721_c0_g1|g.7466 ORF TRINITY_DN103721_c0_g1|g.7466 TRINITY_DN103721_c0_g1_m.7466 type:5prime_partial len:510 (+) TRINITY_DN103721_c0_g1:2-1531(+)	1	0.000173718	87.895	EQLASLLK(1)VHK	2	0.70228	1
TRINITY_DN103721_c0_g1_m.7466	465	K	TRINITY_DN103721_c0_g1|g.7466 ORF TRINITY_DN103721_c0_g1|g.7466 TRINITY_DN103721_c0_g1_m.7466 type:5prime_partial len:510 (+) TRINITY_DN103721_c0_g1:2-1531(+)	1	0.0352981	43.734	WTQGK(1)EYK	2	0.77461	1
TRINITY_DN103728_c4_g1_m.7477	413	K	TRINITY_DN103728_c4_g1|g.7477 ORF TRINITY_DN103728_c4_g1|g.7477 TRINITY_DN103728_c4_g1_m.7477 type:complete len:488 (+) TRINITY_DN103728_c4_g1:103-1566(+)	1	0.0111564	55.578	LYK(1)GTFSNWPIGVNR	2	2.5126	1
TRINITY_DN103728_c4_g1_m.7477	236	K	TRINITY_DN103728_c4_g1|g.7477 ORF TRINITY_DN103728_c4_g1|g.7477 TRINITY_DN103728_c4_g1_m.7477 type:complete len:488 (+) TRINITY_DN103728_c4_g1:103-1566(+)	1	2.98166e-06	124.46	TSK(1)DGTIVDPR	2	0.094412	1
TRINITY_DN103728_c4_g1_m.7477	249	K	TRINITY_DN103728_c4_g1|g.7477 ORF TRINITY_DN103728_c4_g1|g.7477 TRINITY_DN103728_c4_g1_m.7477 type:complete len:488 (+) TRINITY_DN103728_c4_g1:103-1566(+)	1	0.000986241	76.833	LILNK(1)VVR	2	-1.51	1
TRINITY_DN103728_c4_g1_m.7477	380	K	TRINITY_DN103728_c4_g1|g.7477 ORF TRINITY_DN103728_c4_g1|g.7477 TRINITY_DN103728_c4_g1_m.7477 type:complete len:488 (+) TRINITY_DN103728_c4_g1:103-1566(+)	1	1.07796e-13	138.33	IEQQPDSTTK(1)AEAMEVLR	2	-3.0103	1
TRINITY_DN103734_c0_g1_m.7495	526	K	TRINITY_DN103734_c0_g1|g.7495 ORF TRINITY_DN103734_c0_g1|g.7495 TRINITY_DN103734_c0_g1_m.7495 type:complete len:634 (+) TRINITY_DN103734_c0_g1:142-2043(+)	1	0.00188066	64.266	NCEDIDECK(1)EK	2	0.77085	1
TRINITY_DN103752_c0_g1_m.7531	195	K	TRINITY_DN103752_c0_g1|g.7531 ORF TRINITY_DN103752_c0_g1|g.7531 TRINITY_DN103752_c0_g1_m.7531 type:complete len:755 (+) TRINITY_DN103752_c0_g1:670-2934(+)	1	0.0251251	51.456	WLVSK(1)GR	2	-2.4163	1
TRINITY_DN103764_c10_g1_m.7567	487	K	TRINITY_DN103764_c10_g1|g.7567 ORF TRINITY_DN103764_c10_g1|g.7567 TRINITY_DN103764_c10_g1_m.7567 type:3prime_partial len:989 (+) TRINITY_DN103764_c10_g1:119-3082(+)	1	0.0240269	49.058	ALSDFK(1)R	2	-1.9795	1
TRINITY_DN103764_c2_g1_m.7569	53	K	TRINITY_DN103764_c2_g1|g.7569 ORF TRINITY_DN103764_c2_g1|g.7569 TRINITY_DN103764_c2_g1_m.7569 type:5prime_partial len:119 (+) TRINITY_DN103764_c2_g1:2-358(+)	1	8.09724e-06	106.97	INALHSK(1)LSEADK	2	-2.2485	1
TRINITY_DN103764_c5_g1_m.7573	227	K	TRINITY_DN103764_c5_g1|g.7573 ORF TRINITY_DN103764_c5_g1|g.7573 TRINITY_DN103764_c5_g1_m.7573 type:5prime_partial len:347 (+) TRINITY_DN103764_c5_g1:3-1043(+)	1	3.39908e-05	90.306	QFHWLFEDAK(1)GK	2	-0.53917	1
TRINITY_DN103764_c5_g1_m.7573	295	K	TRINITY_DN103764_c5_g1|g.7573 ORF TRINITY_DN103764_c5_g1|g.7573 TRINITY_DN103764_c5_g1_m.7573 type:5prime_partial len:347 (+) TRINITY_DN103764_c5_g1:3-1043(+)	1	2.38934e-07	138	PK(1)GQDLK	2	-0.1331	2
TRINITY_DN103764_c5_g1_m.7574	156	K	TRINITY_DN103764_c5_g1|g.7574 ORF TRINITY_DN103764_c5_g1|g.7574 TRINITY_DN103764_c5_g1_m.7574 type:complete len:212 (+) TRINITY_DN103764_c5_g1:1036-1671(+)	1	0.0121171	79.311	VPVGIGENTK(1)IR	2	-1.7978	1
TRINITY_DN103764_c9_g1_m.7580	95	K	TRINITY_DN103764_c9_g1|g.7580 ORF TRINITY_DN103764_c9_g1|g.7580 TRINITY_DN103764_c9_g1_m.7580 type:5prime_partial len:218 (+) TRINITY_DN103764_c9_g1:1-654(+)	1	0.00171057	83.358	NVSLSNYK(1)GK	2	-1.2288	1
TRINITY_DN103764_c9_g1_m.7580	114	K	TRINITY_DN103764_c9_g1|g.7580 ORF TRINITY_DN103764_c9_g1|g.7580 TRINITY_DN103764_c9_g1_m.7580 type:5prime_partial len:218 (+) TRINITY_DN103764_c9_g1:1-654(+)	1	2.95971e-23	144.42	GKPIVVYFYPADETPGCTK(1)EACAFR	3	-0.089394	1
TRINITY_DN103764_c9_g1_m.7580	205	K	TRINITY_DN103764_c9_g1|g.7580 ORF TRINITY_DN103764_c9_g1|g.7580 TRINITY_DN103764_c9_g1_m.7580 type:5prime_partial len:218 (+) TRINITY_DN103764_c9_g1:1-654(+)	1	4.85435e-05	46.206	VQLVYNNQFQPEK(1)HVDETLK	3	-1.4275	1
TRINITY_DN103764_c9_g1_m.7580	212	K	TRINITY_DN103764_c9_g1|g.7580 ORF TRINITY_DN103764_c9_g1|g.7580 TRINITY_DN103764_c9_g1_m.7580 type:5prime_partial len:218 (+) TRINITY_DN103764_c9_g1:1-654(+)	1	0.000944083	62.271	HVDETLK(1)LLQSL	2	0.571	1
TRINITY_DN103764_c9_g1_m.7580	145	K	TRINITY_DN103764_c9_g1|g.7580 ORF TRINITY_DN103764_c9_g1|g.7580 TRINITY_DN103764_c9_g1_m.7580 type:5prime_partial len:218 (+) TRINITY_DN103764_c9_g1:1-654(+)	1	3.51774e-05	66.913	AGAEVVGISGDDPTSHK(1)AFASK	3	-2.4535	1
TRINITY_DN103764_c9_g1_m.7580	72	K	TRINITY_DN103764_c9_g1|g.7580 ORF TRINITY_DN103764_c9_g1|g.7580 TRINITY_DN103764_c9_g1_m.7580 type:5prime_partial len:218 (+) TRINITY_DN103764_c9_g1:1-654(+)	1	0.00747848	50.09	VSK(1)GDVPPNFNLK	2	4.0456	2
TRINITY_DN103764_c9_g1_m.7580	164	K	TRINITY_DN103764_c9_g1|g.7580 ORF TRINITY_DN103764_c9_g1|g.7580 TRINITY_DN103764_c9_g1_m.7580 type:5prime_partial len:218 (+) TRINITY_DN103764_c9_g1:1-654(+)	1	0.000508591	68.548	LPFTLLSDEGNK(1)VR	2	0.26463	1
TRINITY_DN103764_c9_g1_m.7580	150	K	TRINITY_DN103764_c9_g1|g.7580 ORF TRINITY_DN103764_c9_g1|g.7580 TRINITY_DN103764_c9_g1_m.7580 type:5prime_partial len:218 (+) TRINITY_DN103764_c9_g1:1-654(+)	1	0.0192596	49.058	AFASK(1)YK	2	0.037515	1
TRINITY_DN103771_c0_g1_m.7588	362	K	TRINITY_DN103771_c0_g1|g.7588 ORF TRINITY_DN103771_c0_g1|g.7588 TRINITY_DN103771_c0_g1_m.7588 type:complete len:539 (+) TRINITY_DN103771_c0_g1:289-1905(+)	1	0.0014661	99.589	GELNALQEASGGK(1)R	2	-0.84254	1
TRINITY_DN103771_c0_g1_m.7588	278	K	TRINITY_DN103771_c0_g1|g.7588 ORF TRINITY_DN103771_c0_g1|g.7588 TRINITY_DN103771_c0_g1_m.7588 type:complete len:539 (+) TRINITY_DN103771_c0_g1:289-1905(+)	1	0.000592565	63.79	IVK(1)ADVEDYLASAAK	2	3.465	2
TRINITY_DN103771_c0_g1_m.7588	169	K	TRINITY_DN103771_c0_g1|g.7588 ORF TRINITY_DN103771_c0_g1|g.7588 TRINITY_DN103771_c0_g1_m.7588 type:complete len:539 (+) TRINITY_DN103771_c0_g1:289-1905(+)	1	0.000115875	120.65	IIK(1)GDGAQNIK	2	0.19197	1
TRINITY_DN103771_c0_g1_m.7588	268	K	TRINITY_DN103771_c0_g1|g.7588 ORF TRINITY_DN103771_c0_g1|g.7588 TRINITY_DN103771_c0_g1_m.7588 type:complete len:539 (+) TRINITY_DN103771_c0_g1:289-1905(+)	1	0.000292132	86.952	LAEDNNVPLSSLK(1)GTGPDGR	2	-1.3269	1
TRINITY_DN103776_c8_g1_m.7602	85	K	TRINITY_DN103776_c8_g1|g.7602 ORF TRINITY_DN103776_c8_g1|g.7602 TRINITY_DN103776_c8_g1_m.7602 type:complete len:146 (+) TRINITY_DN103776_c8_g1:120-557(+)	1	2.05757e-14	181.44	ETAVAAPAKPPPPPPIGPK(1)R	3	-1.6731	2
TRINITY_DN103776_c8_g1_m.7602	114	K	TRINITY_DN103776_c8_g1|g.7602 ORF TRINITY_DN103776_c8_g1|g.7602 TRINITY_DN103776_c8_g1_m.7602 type:complete len:146 (+) TRINITY_DN103776_c8_g1:120-557(+)	1	4.241e-10	112.06	ESYWYNGTGSVVTVDQDPK(1)SR	2	-3.2751	1
TRINITY_DN103789_c5_g2_m.7630	291	K	TRINITY_DN103789_c5_g2|g.7630 ORF TRINITY_DN103789_c5_g2|g.7630 TRINITY_DN103789_c5_g2_m.7630 type:5prime_partial len:413 (+) TRINITY_DN103789_c5_g2:3-1241(+)	1	1.11698e-47	231.92	IYSVNEGNAK(1)NWDGPTAK	2	-3.3144	1
TRINITY_DN103789_c5_g2_m.7630	382	K	TRINITY_DN103789_c5_g2|g.7630 ORF TRINITY_DN103789_c5_g2|g.7630 TRINITY_DN103789_c5_g2_m.7630 type:5prime_partial len:413 (+) TRINITY_DN103789_c5_g2:3-1241(+)	1	0.0703937	47.349	ALDLVPK(1)K	2	-4.658	1
TRINITY_DN103789_c5_g2_m.7630	97	K	TRINITY_DN103789_c5_g2|g.7630 ORF TRINITY_DN103789_c5_g2|g.7630 TRINITY_DN103789_c5_g2_m.7630 type:5prime_partial len:413 (+) TRINITY_DN103789_c5_g2:3-1241(+)	1	2.10302e-07	106.11	FVLNEQSK(1)HPDSK	2	-0.43235	1
TRINITY_DN103789_c5_g2_m.7630	146	K	TRINITY_DN103789_c5_g2|g.7630 ORF TRINITY_DN103789_c5_g2|g.7630 TRINITY_DN103789_c5_g2_m.7630 type:5prime_partial len:413 (+) TRINITY_DN103789_c5_g2:3-1241(+)	1	2.55474e-09	109.47	LIGLAGDTNVQGEEQK(1)K	2	-4.0646	1
TRINITY_DN103794_c1_g1_m.7639	351	K	TRINITY_DN103794_c1_g1|g.7639 ORF TRINITY_DN103794_c1_g1|g.7639 TRINITY_DN103794_c1_g1_m.7639 type:3prime_partial len:477 (-) TRINITY_DN103794_c1_g1:2-1429(-)	1	0.0175436	47.334	GK(1)VVEWCSQVR	2	1.3895	1
TRINITY_DN103795_c4_g3_m.7646	199	K	TRINITY_DN103795_c4_g3|g.7646 ORF TRINITY_DN103795_c4_g3|g.7646 TRINITY_DN103795_c4_g3_m.7646 type:complete len:457 (+) TRINITY_DN103795_c4_g3:237-1607(+)	1	0.0618174	41.025	PLLDFK(1)K	2	-2.9293	1
TRINITY_DN103801_c1_g1_m.7659	94	K	TRINITY_DN103801_c1_g1|g.7659 ORF TRINITY_DN103801_c1_g1|g.7659 TRINITY_DN103801_c1_g1_m.7659 type:5prime_partial len:224 (+) TRINITY_DN103801_c1_g1:3-674(+)	1	7.7939e-05	101.82	PLAVAAAASTK(1)K	2	-0.10429	1
TRINITY_DN103801_c1_g1_m.7659	167	K	TRINITY_DN103801_c1_g1|g.7659 ORF TRINITY_DN103801_c1_g1|g.7659 TRINITY_DN103801_c1_g1_m.7659 type:5prime_partial len:224 (+) TRINITY_DN103801_c1_g1:3-674(+)	1	0.000136336	90.306	MTHGAPK(1)DNIR	2	-1.8546	2
TRINITY_DN103814_c0_g1_m.7682	32	K	TRINITY_DN103814_c0_g1|g.7682 ORF TRINITY_DN103814_c0_g1|g.7682 TRINITY_DN103814_c0_g1_m.7682 type:5prime_partial len:606 (+) TRINITY_DN103814_c0_g1:1-1818(+)	1	5.18608e-57	257.38	NQVAMNPINTVFDAK(1)R	2	0.39731	4
TRINITY_DN103814_c0_g1_m.7682	503	K	TRINITY_DN103814_c0_g1|g.7682 ORF TRINITY_DN103814_c0_g1|g.7682 TRINITY_DN103814_c0_g1_m.7682 type:5prime_partial len:606 (+) TRINITY_DN103814_c0_g1:1-1818(+)	1	2.53999e-08	140.01	VESK(1)NTLENYAYNMR	2	-4.0733	1
TRINITY_DN103814_c0_g1_m.7682	476	K	TRINITY_DN103814_c0_g1|g.7682 ORF TRINITY_DN103814_c0_g1|g.7682 TRINITY_DN103814_c0_g1_m.7682 type:5prime_partial len:606 (+) TRINITY_DN103814_c0_g1:1-1818(+)	1	0.0035504	105.36	LSK(1)DEIEK	2	-1.2496	1
TRINITY_DN103814_c0_g1_m.7682	70	K	TRINITY_DN103814_c0_g1|g.7682 ORF TRINITY_DN103814_c0_g1|g.7682 TRINITY_DN103814_c0_g1_m.7682 type:5prime_partial len:606 (+) TRINITY_DN103814_c0_g1:1-1818(+)	0.996391	0.0008665	42.218	VIPGPGDK(0.004)PMIVVQYK(0.996)GEDK	3	-1.4095	1
TRINITY_DN103814_c0_g1_m.7682	49	K	TRINITY_DN103814_c0_g1|g.7682 ORF TRINITY_DN103814_c0_g1|g.7682 TRINITY_DN103814_c0_g1_m.7682 type:5prime_partial len:606 (+) TRINITY_DN103814_c0_g1:1-1818(+)	1	2.77135e-13	132.9	FSDASVQSDIK(1)LWPFK	2	1.0608	1
TRINITY_DN103814_c0_g1_m.7682	292	K	TRINITY_DN103814_c0_g1|g.7682 ORF TRINITY_DN103814_c0_g1|g.7682 TRINITY_DN103814_c0_g1_m.7682 type:5prime_partial len:606 (+) TRINITY_DN103814_c0_g1:1-1818(+)	1	3.78422e-06	68.127	MDK(1)STIHDVVLVGGSTR	2	-1.9824	2
TRINITY_DN103814_c0_g1_m.7682	525	K	TRINITY_DN103814_c0_g1|g.7682 ORF TRINITY_DN103814_c0_g1|g.7682 TRINITY_DN103814_c0_g1_m.7682 type:5prime_partial len:606 (+) TRINITY_DN103814_c0_g1:1-1818(+)	1	1.61592e-07	141.44	IASK(1)LAADDK	2	0.22199	2
TRINITY_DN103819_c1_g2_m.7690	405	K	TRINITY_DN103819_c1_g2|g.7690 ORF TRINITY_DN103819_c1_g2|g.7690 TRINITY_DN103819_c1_g2_m.7690 type:complete len:708 (+) TRINITY_DN103819_c1_g2:178-2301(+)	1	0.0298966	42.229	MDVGK(1)YK	2	3.3166	1
TRINITY_DN103819_c1_g2_m.7690	508	K	TRINITY_DN103819_c1_g2|g.7690 ORF TRINITY_DN103819_c1_g2|g.7690 TRINITY_DN103819_c1_g2_m.7690 type:complete len:708 (+) TRINITY_DN103819_c1_g2:178-2301(+)	1	4.52122e-06	58.794	HETK(1)VEHLFVIDSSAR	3	-2.7849	1
TRINITY_DN103828_c6_g1_m.7709	75	K	TRINITY_DN103828_c6_g1|g.7709 ORF TRINITY_DN103828_c6_g1|g.7709 TRINITY_DN103828_c6_g1_m.7709 type:complete len:156 (+) TRINITY_DN103828_c6_g1:149-616(+)	1	0.0595895	47.349	QK(1)PTESSR	2	2.1803	1
TRINITY_DN103833_c0_g31_m.7717	72	K	TRINITY_DN103833_c0_g31|g.7717 ORF TRINITY_DN103833_c0_g31|g.7717 TRINITY_DN103833_c0_g31_m.7717 type:internal len:224 (+) TRINITY_DN103833_c0_g31:3-671(+)	1	0.0156732	60.892	IMPVQK(1)QTR	2	-2.2761	1
TRINITY_DN103833_c0_g31_m.7717	61	K	TRINITY_DN103833_c0_g31|g.7717 ORF TRINITY_DN103833_c0_g31|g.7717 TRINITY_DN103833_c0_g31_m.7717 type:internal len:224 (+) TRINITY_DN103833_c0_g31:3-671(+)	1	7.24783e-10	101.52	EHQIVETILGPQLK(1)DEVMK	3	-3.9976	2
TRINITY_DN103833_c0_g31_m.7717	23	K	TRINITY_DN103833_c0_g31|g.7717 ORF TRINITY_DN103833_c0_g31|g.7717 TRINITY_DN103833_c0_g31_m.7717 type:internal len:224 (+) TRINITY_DN103833_c0_g31:3-671(+)	1	0.00798375	72.492	WVPVTK(1)LGR	2	-3.0966	1
TRINITY_DN103851_c0_g1_m.7756	333	K	TRINITY_DN103851_c0_g1|g.7756 ORF TRINITY_DN103851_c0_g1|g.7756 TRINITY_DN103851_c0_g1_m.7756 type:5prime_partial len:358 (+) TRINITY_DN103851_c0_g1:2-1075(+)	1	2.18096e-05	62.454	TLTVK(1)EYTSEYFAGK	2	3.0827	1
TRINITY_DN103851_c0_g1_m.7756	354	K	TRINITY_DN103851_c0_g1|g.7756 ORF TRINITY_DN103851_c0_g1|g.7756 TRINITY_DN103851_c0_g1_m.7756 type:5prime_partial len:358 (+) TRINITY_DN103851_c0_g1:2-1075(+)	1	0.000435925	83.623	NSLESVK(1)LR	2	1.128	1
TRINITY_DN103851_c0_g1_m.7756	177	K	TRINITY_DN103851_c0_g1|g.7756 ORF TRINITY_DN103851_c0_g1|g.7756 TRINITY_DN103851_c0_g1_m.7756 type:5prime_partial len:358 (+) TRINITY_DN103851_c0_g1:2-1075(+)	1	4.43012e-07	101.82	DTLETYTSK(1)VAR	2	4.0375	1
TRINITY_DN103851_c0_g1_m.7756	284	K	TRINITY_DN103851_c0_g1|g.7756 ORF TRINITY_DN103851_c0_g1|g.7756 TRINITY_DN103851_c0_g1_m.7756 type:5prime_partial len:358 (+) TRINITY_DN103851_c0_g1:2-1075(+)	1	0.00320883	105.04	YK(1)SIEHR	2	1.4856	1
TRINITY_DN103851_c0_g1_m.7756	100	K	TRINITY_DN103851_c0_g1|g.7756 ORF TRINITY_DN103851_c0_g1|g.7756 TRINITY_DN103851_c0_g1_m.7756 type:5prime_partial len:358 (+) TRINITY_DN103851_c0_g1:2-1075(+)	1	0.00170604	137.88	TK(1)DDINK	2	0.77895	1
TRINITY_DN103857_c4_g1_m.7771	23	K	TRINITY_DN103857_c4_g1|g.7771 ORF TRINITY_DN103857_c4_g1|g.7771 TRINITY_DN103857_c4_g1_m.7771 type:complete len:412 (+) TRINITY_DN103857_c4_g1:500-1735(+)	1	5.62492e-06	112.8	LLGLDSK(1)LER	2	-1.894	1
TRINITY_DN103857_c4_g1_m.7771	325	K	TRINITY_DN103857_c4_g1|g.7771 ORF TRINITY_DN103857_c4_g1|g.7771 TRINITY_DN103857_c4_g1_m.7771 type:complete len:412 (+) TRINITY_DN103857_c4_g1:500-1735(+)	1	4.37042e-10	95.001	FIIEAANHPTDPEADEILSK(1)K	3	-1.0335	1
TRINITY_DN103866_c0_g1_m.7782	310	K	TRINITY_DN103866_c0_g1|g.7782 ORF TRINITY_DN103866_c0_g1|g.7782 TRINITY_DN103866_c0_g1_m.7782 type:complete len:476 (+) TRINITY_DN103866_c0_g1:529-1956(+)	1	2.89276e-05	112.73	AAQQVSK(1)HFYDEK	2	-3.493	1
TRINITY_DN103908_c1_g1_m.7878	100	K	TRINITY_DN103908_c1_g1|g.7878 ORF TRINITY_DN103908_c1_g1|g.7878 TRINITY_DN103908_c1_g1_m.7878 type:complete len:181 (+) TRINITY_DN103908_c1_g1:343-885(+)	1	0.0266987	42.835	VIK(1)VHER	2	-0.98512	1
TRINITY_DN103943_c2_g2_m.7944	52	K	TRINITY_DN103943_c2_g2|g.7944 ORF TRINITY_DN103943_c2_g2|g.7944 TRINITY_DN103943_c2_g2_m.7944 type:complete len:562 (+) TRINITY_DN103943_c2_g2:155-1840(+)	1	4.60817e-08	112.95	SLVSEK(1)CDVPAEQQR	2	-2.7267	1
TRINITY_DN103948_c3_g1_m.7952	135	K	TRINITY_DN103948_c3_g1|g.7952 ORF TRINITY_DN103948_c3_g1|g.7952 TRINITY_DN103948_c3_g1_m.7952 type:complete len:137 (+) TRINITY_DN103948_c3_g1:146-556(+)	1	0.00113262	119.07	LVITDVEHK(1)R	2	-1.6657	1
TRINITY_DN103957_c3_g4_m.7969	37	K	TRINITY_DN103957_c3_g4|g.7969 ORF TRINITY_DN103957_c3_g4|g.7969 TRINITY_DN103957_c3_g4_m.7969 type:complete len:501 (+) TRINITY_DN103957_c3_g4:216-1718(+)	1	0.0159689	54.436	ESVIPILK(1)PK	2	-3.26	1
TRINITY_DN103974_c0_g1_m.7997	158	K	TRINITY_DN103974_c0_g1|g.7997 ORF TRINITY_DN103974_c0_g1|g.7997 TRINITY_DN103974_c0_g1_m.7997 type:complete len:1477 (+) TRINITY_DN103974_c0_g1:159-4589(+)	1	0.0275848	72.042	RPDGTK(1)VYK	2	-0.46949	1
TRINITY_DN103974_c0_g1_m.7997	261	K	TRINITY_DN103974_c0_g1|g.7997 ORF TRINITY_DN103974_c0_g1|g.7997 TRINITY_DN103974_c0_g1_m.7997 type:complete len:1477 (+) TRINITY_DN103974_c0_g1:159-4589(+)	1	0.00238251	53.517	QEK(1)EEYEVAR	2	-1.7831	1
TRINITY_DN103974_c0_g1_m.7997	296	K	TRINITY_DN103974_c0_g1|g.7997 ORF TRINITY_DN103974_c0_g1|g.7997 TRINITY_DN103974_c0_g1_m.7997 type:complete len:1477 (+) TRINITY_DN103974_c0_g1:159-4589(+)	1	0.00694742	71.219	ATLSNRPETVK(1)EK	2	-1.5559	1
TRINITY_DN103974_c0_g1_m.7997	767	K	TRINITY_DN103974_c0_g1|g.7997 ORF TRINITY_DN103974_c0_g1|g.7997 TRINITY_DN103974_c0_g1_m.7997 type:complete len:1477 (+) TRINITY_DN103974_c0_g1:159-4589(+)	1	0.0378322	44.57	HDQK(1)EGLLR	2	0.06279	1
TRINITY_DN103974_c0_g1_m.7997	746	K	TRINITY_DN103974_c0_g1|g.7997 ORF TRINITY_DN103974_c0_g1|g.7997 TRINITY_DN103974_c0_g1_m.7997 type:complete len:1477 (+) TRINITY_DN103974_c0_g1:159-4589(+)	1	0.00188118	52.837	TLNDNGITK(1)ER	2	-2.0329	1
TRINITY_DN103974_c0_g1_m.7997	895	K	TRINITY_DN103974_c0_g1|g.7997 ORF TRINITY_DN103974_c0_g1|g.7997 TRINITY_DN103974_c0_g1_m.7997 type:complete len:1477 (+) TRINITY_DN103974_c0_g1:159-4589(+)	1	0.000113719	101.48	GYEELNNAEPK(1)K	2	0.39469	1
TRINITY_DN103986_c1_g1_m.8014	540	K	TRINITY_DN103986_c1_g1|g.8014 ORF TRINITY_DN103986_c1_g1|g.8014 TRINITY_DN103986_c1_g1_m.8014 type:complete len:584 (+) TRINITY_DN103986_c1_g1:93-1844(+)	1	0.0172069	65.12	TPIEGFYLAGDYTK(1)QK	2	0.083142	1
TRINITY_DN103997_c0_g2_m.8041	908	K	TRINITY_DN103997_c0_g2|g.8041 ORF TRINITY_DN103997_c0_g2|g.8041 TRINITY_DN103997_c0_g2_m.8041 type:complete len:1206 (+) TRINITY_DN103997_c0_g2:271-3888(+)	1	0.061393	56.014	SK(1)IVDGR	2	1.0257	1
TRINITY_DN103997_c0_g2_m.8041	789	K	TRINITY_DN103997_c0_g2|g.8041 ORF TRINITY_DN103997_c0_g2|g.8041 TRINITY_DN103997_c0_g2_m.8041 type:complete len:1206 (+) TRINITY_DN103997_c0_g2:271-3888(+)	1	1.31899e-07	94.66	EETGAGMMDCK(1)K	2	-0.39552	1
TRINITY_DN103997_c0_g2_m.8041	887	K	TRINITY_DN103997_c0_g2|g.8041 ORF TRINITY_DN103997_c0_g2|g.8041 TRINITY_DN103997_c0_g2_m.8041 type:complete len:1206 (+) TRINITY_DN103997_c0_g2:271-3888(+)	1	0.0159602	45.183	YLVPEDVPDEIVNK(1)ER	2	-3.4407	1
TRINITY_DN103997_c0_g2_m.8041	263	K	TRINITY_DN103997_c0_g2|g.8041 ORF TRINITY_DN103997_c0_g2|g.8041 TRINITY_DN103997_c0_g2_m.8041 type:complete len:1206 (+) TRINITY_DN103997_c0_g2:271-3888(+)	1	0.00537829	76.255	LVK(1)GQILDGTVK	2	1.9803	1
TRINITY_DN103997_c0_g2_m.8041	895	K	TRINITY_DN103997_c0_g2|g.8041 ORF TRINITY_DN103997_c0_g2|g.8041 TRINITY_DN103997_c0_g2_m.8041 type:complete len:1206 (+) TRINITY_DN103997_c0_g2:271-3888(+)	0.997018	0.000280457	57.042	EIEMQK(0.997)EDLLTK(0.003)PEQIR	3	0.20785	1
TRINITY_DN103997_c0_g2_m.8041	1128	K	TRINITY_DN103997_c0_g2|g.8041 ORF TRINITY_DN103997_c0_g2|g.8041 TRINITY_DN103997_c0_g2_m.8041 type:complete len:1206 (+) TRINITY_DN103997_c0_g2:271-3888(+)	1	0.00239775	102.46	EK(1)EIEMQR	2	-0.59791	1
TRINITY_DN104036_c0_g2_m.8121	9	K	TRINITY_DN104036_c0_g2|g.8121 ORF TRINITY_DN104036_c0_g2|g.8121 TRINITY_DN104036_c0_g2_m.8121 type:complete len:126 (+) TRINITY_DN104036_c0_g2:553-930(+)	1	5.38648e-05	97.084	IDFAPK(1)GLNPPHTHPR	3	0.7058	1
TRINITY_DN104037_c3_g1_m.8129	1249	K	TRINITY_DN104037_c3_g1|g.8129 ORF TRINITY_DN104037_c3_g1|g.8129 TRINITY_DN104037_c3_g1_m.8129 type:complete len:1707 (+) TRINITY_DN104037_c3_g1:239-5359(+)	1	2.73048e-10	122.51	LK(1)QFQGAVDAAR	2	-2.701	1
TRINITY_DN104037_c3_g1_m.8129	391	K	TRINITY_DN104037_c3_g1|g.8129 ORF TRINITY_DN104037_c3_g1|g.8129 TRINITY_DN104037_c3_g1_m.8129 type:complete len:1707 (+) TRINITY_DN104037_c3_g1:239-5359(+)	1	2.11784e-09	118.87	YK(1)EAAELAAESPQGLLR	2	-2.055	1
TRINITY_DN104037_c3_g1_m.8129	955	K	TRINITY_DN104037_c3_g1|g.8129 ORF TRINITY_DN104037_c3_g1|g.8129 TRINITY_DN104037_c3_g1_m.8129 type:complete len:1707 (+) TRINITY_DN104037_c3_g1:239-5359(+)	1	0.0142713	67.464	NSLFK(1)LQAR	2	-0.073723	1
TRINITY_DN104037_c3_g1_m.8129	1361	K	TRINITY_DN104037_c3_g1|g.8129 ORF TRINITY_DN104037_c3_g1|g.8129 TRINITY_DN104037_c3_g1_m.8129 type:complete len:1707 (+) TRINITY_DN104037_c3_g1:239-5359(+)	1	0.0465772	56.091	LNIPK(1)LIR	2	-4.8954	1
TRINITY_DN104037_c3_g1_m.8129	389	K	TRINITY_DN104037_c3_g1|g.8129 ORF TRINITY_DN104037_c3_g1|g.8129 TRINITY_DN104037_c3_g1_m.8129 type:complete len:1707 (+) TRINITY_DN104037_c3_g1:239-5359(+)	1	3.62565e-21	147.78	FQELFSQTK(1)YK	2	1.9737	1
TRINITY_DN104037_c3_g1_m.8129	751	K	TRINITY_DN104037_c3_g1|g.8129 ORF TRINITY_DN104037_c3_g1|g.8129 TRINITY_DN104037_c3_g1_m.8129 type:complete len:1707 (+) TRINITY_DN104037_c3_g1:239-5359(+)	1	6.94464e-05	51.531	YIEAAAK(1)TGQIK	2	-0.67853	1
TRINITY_DN104037_c3_g1_m.8129	651	K	TRINITY_DN104037_c3_g1|g.8129 ORF TRINITY_DN104037_c3_g1|g.8129 TRINITY_DN104037_c3_g1_m.8129 type:complete len:1707 (+) TRINITY_DN104037_c3_g1:239-5359(+)	1	1.11922e-07	108.24	ALQHYSELPDIK(1)R	2	-1.1011	1
TRINITY_DN104037_c3_g1_m.8129	1351	K	TRINITY_DN104037_c3_g1|g.8129 ORF TRINITY_DN104037_c3_g1|g.8129 TRINITY_DN104037_c3_g1_m.8129 type:complete len:1707 (+) TRINITY_DN104037_c3_g1:239-5359(+)	1	0.000115875	120.65	LMEHIK(1)LFSTR	2	3.1564	1
TRINITY_DN104037_c3_g1_m.8129	439	K	TRINITY_DN104037_c3_g1|g.8129 ORF TRINITY_DN104037_c3_g1|g.8129 TRINITY_DN104037_c3_g1_m.8129 type:complete len:1707 (+) TRINITY_DN104037_c3_g1:239-5359(+)	1	1.8825e-08	124.06	GK(1)LNAFESLELSR	2	-1.0444	1
TRINITY_DN104037_c3_g1_m.8129	106	K	TRINITY_DN104037_c3_g1|g.8129 ORF TRINITY_DN104037_c3_g1|g.8129 TRINITY_DN104037_c3_g1_m.8129 type:complete len:1707 (+) TRINITY_DN104037_c3_g1:239-5359(+)	1	0.00416783	51.454	MK(1)SHQMPEQVVFWK	3	0.49801	1
TRINITY_DN104037_c3_g1_m.8129	781	K	TRINITY_DN104037_c3_g1|g.8129 ORF TRINITY_DN104037_c3_g1|g.8129 TRINITY_DN104037_c3_g1_m.8129 type:complete len:1707 (+) TRINITY_DN104037_c3_g1:239-5359(+)	1	0.000296313	78.043	NFLMEAK(1)LPDAR	2	-1.402	1
TRINITY_DN104037_c3_g1_m.8129	1549	K	TRINITY_DN104037_c3_g1|g.8129 ORF TRINITY_DN104037_c3_g1|g.8129 TRINITY_DN104037_c3_g1_m.8129 type:complete len:1707 (+) TRINITY_DN104037_c3_g1:239-5359(+)	1	0.000362632	83.474	LYK(1)DAMETCSQSGDR	2	-4.963	1
TRINITY_DN104037_c3_g1_m.8129	1536	K	TRINITY_DN104037_c3_g1|g.8129 ORF TRINITY_DN104037_c3_g1|g.8129 TRINITY_DN104037_c3_g1_m.8129 type:complete len:1707 (+) TRINITY_DN104037_c3_g1:239-5359(+)	1	0.0656274	40.386	WK(1)QSIALSK	2	-0.71353	1
TRINITY_DN104049_c3_g3_m.8161	28	K	TRINITY_DN104049_c3_g3|g.8161 ORF TRINITY_DN104049_c3_g3|g.8161 TRINITY_DN104049_c3_g3_m.8161 type:complete len:325 (+) TRINITY_DN104049_c3_g3:86-1060(+)	1	0.00199318	69.915	SSHAVAAVGK(1)K	2	-0.66558	1
TRINITY_DN104049_c3_g3_m.8161	46	K	TRINITY_DN104049_c3_g3|g.8161 ORF TRINITY_DN104049_c3_g3|g.8161 TRINITY_DN104049_c3_g3_m.8161 type:complete len:325 (+) TRINITY_DN104049_c3_g3:86-1060(+)	1	0.00147194	50.641	VPVDNK(1)LHVFDLDQR	3	-3.3237	1
TRINITY_DN104063_c0_g2_m.8197	21	K	TRINITY_DN104063_c0_g2|g.8197 ORF TRINITY_DN104063_c0_g2|g.8197 TRINITY_DN104063_c0_g2_m.8197 type:complete len:2627 (+) TRINITY_DN104063_c0_g2:182-8062(+)	1	2.48983e-05	108.24	AAAEGVSTASTK(1)QR	2	-0.74783	1
TRINITY_DN104074_c0_g1_m.8232	59	K	TRINITY_DN104074_c0_g1|g.8232 ORF TRINITY_DN104074_c0_g1|g.8232 TRINITY_DN104074_c0_g1_m.8232 type:5prime_partial len:453 (+) TRINITY_DN104074_c0_g1:3-1361(+)	1	0.0568468	42.075	NTK(1)LNSGK	2	-0.7754	1
TRINITY_DN104074_c0_g1_m.8232	64	K	TRINITY_DN104074_c0_g1|g.8232 ORF TRINITY_DN104074_c0_g1|g.8232 TRINITY_DN104074_c0_g1_m.8232 type:5prime_partial len:453 (+) TRINITY_DN104074_c0_g1:3-1361(+)	1	1.54279e-05	115.04	LNSGK(1)IVAVGPGIR	2	1.0918	1
TRINITY_DN104074_c0_g1_m.8232	78	K	TRINITY_DN104074_c0_g1|g.8232 ORF TRINITY_DN104074_c0_g1|g.8232 TRINITY_DN104074_c0_g1_m.8232 type:5prime_partial len:453 (+) TRINITY_DN104074_c0_g1:3-1361(+)	0.875453	0.00625052	60	DK(0.125)DGK(0.875)HIPLSLK	3	-1.3546	1
TRINITY_DN104076_c0_g3_m.8233	41	K	TRINITY_DN104076_c0_g3|g.8233 ORF TRINITY_DN104076_c0_g3|g.8233 TRINITY_DN104076_c0_g3_m.8233 type:complete len:110 (+) TRINITY_DN104076_c0_g3:1263-1592(+)	1	0.0165849	61.48	IDMMDVIYK(1)R	2	0.037892	1
TRINITY_DN104081_c0_g1_m.8244	117	K	TRINITY_DN104081_c0_g1|g.8244 ORF TRINITY_DN104081_c0_g1|g.8244 TRINITY_DN104081_c0_g1_m.8244 type:3prime_partial len:250 (+) TRINITY_DN104081_c0_g1:523-1269(+)	1	0.0282454	64.547	ELLAAK(1)R	2	0.067053	1
TRINITY_DN104081_c0_g1_m.8244	79	K	TRINITY_DN104081_c0_g1|g.8244 ORF TRINITY_DN104081_c0_g1|g.8244 TRINITY_DN104081_c0_g1_m.8244 type:3prime_partial len:250 (+) TRINITY_DN104081_c0_g1:523-1269(+)	1	0.0161969	58.286	VK(1)AEELR	2	1.3228	1
TRINITY_DN104085_c0_g1_m.8253	62	K	TRINITY_DN104085_c0_g1|g.8253 ORF TRINITY_DN104085_c0_g1|g.8253 TRINITY_DN104085_c0_g1_m.8253 type:internal len:141 (+) TRINITY_DN104085_c0_g1:1-420(+)	1	2.14831e-05	61.503	LSSESEFLNHHIPWEK(1)VTVGK	3	1.1607	1
TRINITY_DN104085_c0_g2_m.8254	246	K	TRINITY_DN104085_c0_g2|g.8254 ORF TRINITY_DN104085_c0_g2|g.8254 TRINITY_DN104085_c0_g2_m.8254 type:internal len:287 (+) TRINITY_DN104085_c0_g2:3-860(+)	1	1.72713e-05	77.358	EK(1)QYLSAYNDFK	2	0.32404	1
TRINITY_DN104085_c0_g2_m.8254	156	K	TRINITY_DN104085_c0_g2|g.8254 ORF TRINITY_DN104085_c0_g2|g.8254 TRINITY_DN104085_c0_g2_m.8254 type:internal len:287 (+) TRINITY_DN104085_c0_g2:3-860(+)	1	1.43737e-10	162.21	EVVTSAYK(1)AETK	2	-0.36424	1
TRINITY_DN104085_c0_g2_m.8254	148	K	TRINITY_DN104085_c0_g2|g.8254 ORF TRINITY_DN104085_c0_g2|g.8254 TRINITY_DN104085_c0_g2_m.8254 type:internal len:287 (+) TRINITY_DN104085_c0_g2:3-860(+)	1	0.00153058	70.195	STFK(1)EVVTSAYK	2	8.3779	1
TRINITY_DN104085_c0_g2_m.8254	160	K	TRINITY_DN104085_c0_g2|g.8254 ORF TRINITY_DN104085_c0_g2|g.8254 TRINITY_DN104085_c0_g2_m.8254 type:internal len:287 (+) TRINITY_DN104085_c0_g2:3-860(+)	1	0.00149986	96.957	AETK(1)ALDFQAK	2	-1.9392	1
TRINITY_DN104085_c0_g2_m.8254	167	K	TRINITY_DN104085_c0_g2|g.8254 ORF TRINITY_DN104085_c0_g2|g.8254 TRINITY_DN104085_c0_g2_m.8254 type:internal len:287 (+) TRINITY_DN104085_c0_g2:3-860(+)	1	0.000395136	80.623	ALDFQAK(1)ADDAR	2	1.355	1
TRINITY_DN104123_c1_g1_m.8333	269	K	TRINITY_DN104123_c1_g1|g.8333 ORF TRINITY_DN104123_c1_g1|g.8333 TRINITY_DN104123_c1_g1_m.8333 type:complete len:424 (+) TRINITY_DN104123_c1_g1:131-1402(+)	1	0.0447937	60.892	FTVLNSK(1)GR	2	-0.20218	1
TRINITY_DN104123_c1_g1_m.8333	387	K	TRINITY_DN104123_c1_g1|g.8333 ORF TRINITY_DN104123_c1_g1|g.8333 TRINITY_DN104123_c1_g1_m.8333 type:complete len:424 (+) TRINITY_DN104123_c1_g1:131-1402(+)	1	1.93841e-07	83.775	GGPNYQTGLAK(1)MR	2	0.27138	1
TRINITY_DN104123_c1_g1_m.8333	225	K	TRINITY_DN104123_c1_g1|g.8333 ORF TRINITY_DN104123_c1_g1|g.8333 TRINITY_DN104123_c1_g1_m.8333 type:complete len:424 (+) TRINITY_DN104123_c1_g1:131-1402(+)	1	2.94576e-31	207.88	GELDDTAAFK(1)NFK	2	1.9201	1
TRINITY_DN104123_c1_g1_m.8333	148	K	TRINITY_DN104123_c1_g1|g.8333 ORF TRINITY_DN104123_c1_g1|g.8333 TRINITY_DN104123_c1_g1_m.8333 type:complete len:424 (+) TRINITY_DN104123_c1_g1:131-1402(+)	1	0.0117022	57.888	VK(1)TVFLPTEK	2	0.39084	1
TRINITY_DN104123_c1_g1_m.8333	16	K	TRINITY_DN104123_c1_g1|g.8333 ORF TRINITY_DN104123_c1_g1|g.8333 TRINITY_DN104123_c1_g1_m.8333 type:complete len:424 (+) TRINITY_DN104123_c1_g1:131-1402(+)	1	0.0551862	60.589	LLK(1)EHLK	2	0.15202	1
TRINITY_DN104128_c1_g1_m.8348	112	K	TRINITY_DN104128_c1_g1|g.8348 ORF TRINITY_DN104128_c1_g1|g.8348 TRINITY_DN104128_c1_g1_m.8348 type:complete len:1073 (+) TRINITY_DN104128_c1_g1:257-3475(+)	1	6.2375e-07	105.78	NLVLAGVK(1)SITLHDEGK	2	-0.44911	1
TRINITY_DN104128_c1_g1_m.8348	941	K	TRINITY_DN104128_c1_g1|g.8348 ORF TRINITY_DN104128_c1_g1|g.8348 TRINITY_DN104128_c1_g1_m.8348 type:complete len:1073 (+) TRINITY_DN104128_c1_g1:257-3475(+)	1	0.000885626	99.174	VLAGGHK(1)LEDYR	2	-2.4223	1
TRINITY_DN104128_c1_g1_m.8348	477	K	TRINITY_DN104128_c1_g1|g.8348 ORF TRINITY_DN104128_c1_g1|g.8348 TRINITY_DN104128_c1_g1_m.8348 type:complete len:1073 (+) TRINITY_DN104128_c1_g1:257-3475(+)	1	0.0055231	65.879	YDAQISVFGAK(1)LQHK	2	-1.5454	1
TRINITY_DN104140_c1_g11_m.8374	52	K	TRINITY_DN104140_c1_g11|g.8374 ORF TRINITY_DN104140_c1_g11|g.8374 TRINITY_DN104140_c1_g11_m.8374 type:internal len:102 (+) TRINITY_DN104140_c1_g11:1-303(+)	1	0.000124905	129.56	DHVFK(1)QIK	2	0.82193	1
TRINITY_DN104169_c1_g3_m.8429	64	K	TRINITY_DN104169_c1_g3|g.8429 ORF TRINITY_DN104169_c1_g3|g.8429 TRINITY_DN104169_c1_g3_m.8429 type:complete len:197 (+) TRINITY_DN104169_c1_g3:172-762(+)	1	2.06696e-08	163.93	LNANDYENDEALK(1)K	2	-3.2238	1
TRINITY_DN104176_c8_g1_m.8436	472	K	TRINITY_DN104176_c8_g1|g.8436 ORF TRINITY_DN104176_c8_g1|g.8436 TRINITY_DN104176_c8_g1_m.8436 type:5prime_partial len:512 (+) TRINITY_DN104176_c8_g1:1-1536(+)	1	5.90795e-12	143.22	HLDEK(1)VAALHLGK	2	-0.99238	2
TRINITY_DN104176_c8_g1_m.8436	308	K	TRINITY_DN104176_c8_g1|g.8436 ORF TRINITY_DN104176_c8_g1|g.8436 TRINITY_DN104176_c8_g1_m.8436 type:5prime_partial len:512 (+) TRINITY_DN104176_c8_g1:1-1536(+)	1	0.000881815	90.306	GCAAALK(1)TAGAR	2	0.31503	1
TRINITY_DN104176_c8_g1_m.8436	43	K	TRINITY_DN104176_c8_g1|g.8436 ORF TRINITY_DN104176_c8_g1|g.8436 TRINITY_DN104176_c8_g1_m.8436 type:5prime_partial len:512 (+) TRINITY_DN104176_c8_g1:1-1536(+)	1	6.66521e-05	99.174	VK(1)DLSQADFGR	2	-1.6844	1
TRINITY_DN104181_c4_g1_m.8446	100	K	TRINITY_DN104181_c4_g1|g.8446 ORF TRINITY_DN104181_c4_g1|g.8446 TRINITY_DN104181_c4_g1_m.8446 type:complete len:230 (+) TRINITY_DN104181_c4_g1:124-813(+)	1	0.000572375	92.445	QAAATTASLAK(1)K	2	0.0087166	1
TRINITY_DN104197_c0_g2_m.8476	476	K	TRINITY_DN104197_c0_g2|g.8476 ORF TRINITY_DN104197_c0_g2|g.8476 TRINITY_DN104197_c0_g2_m.8476 type:complete len:598 (+) TRINITY_DN104197_c0_g2:306-2099(+)	1	0.00185453	65.933	IK(1)NNQEVILQR	2	-3.1675	1
TRINITY_DN104197_c0_g2_m.8476	449	K	TRINITY_DN104197_c0_g2|g.8476 ORF TRINITY_DN104197_c0_g2|g.8476 TRINITY_DN104197_c0_g2_m.8476 type:complete len:598 (+) TRINITY_DN104197_c0_g2:306-2099(+)	1	5.36912e-06	115.05	FK(1)SSVDYQNDGNYK	2	-2.5684	1
TRINITY_DN104206_c2_g2_m.8491	638	K	TRINITY_DN104206_c2_g2|g.8491 ORF TRINITY_DN104206_c2_g2|g.8491 TRINITY_DN104206_c2_g2_m.8491 type:complete len:1063 (+) TRINITY_DN104206_c2_g2:456-3644(+)	1	0.00930543	55.578	AEVHK(1)AIEDCR	2	0.89448	1
TRINITY_DN104207_c5_g1_m.8495	162	K	TRINITY_DN104207_c5_g1|g.8495 ORF TRINITY_DN104207_c5_g1|g.8495 TRINITY_DN104207_c5_g1_m.8495 type:complete len:190 (+) TRINITY_DN104207_c5_g1:168-737(+)	1	0.0649914	51.43	LAEHLK(1)K	2	0.31683	1
TRINITY_DN104207_c5_g1_m.8495	125	K	TRINITY_DN104207_c5_g1|g.8495 ORF TRINITY_DN104207_c5_g1|g.8495 TRINITY_DN104207_c5_g1_m.8495 type:complete len:190 (+) TRINITY_DN104207_c5_g1:168-737(+)	1	0.0119014	53.679	PSGK(1)FWR	2	-1.1224	1
TRINITY_DN104207_c5_g1_m.8495	115	K	TRINITY_DN104207_c5_g1|g.8495 ORF TRINITY_DN104207_c5_g1|g.8495 TRINITY_DN104207_c5_g1_m.8495 type:complete len:190 (+) TRINITY_DN104207_c5_g1:168-737(+)	1	2.20553e-15	160.98	SEEEAEGEK(1)WHR	2	-2.1239	1
TRINITY_DN104208_c0_g7_m.8497	47	K	TRINITY_DN104208_c0_g7|g.8497 ORF TRINITY_DN104208_c0_g7|g.8497 TRINITY_DN104208_c0_g7_m.8497 type:5prime_partial len:466 (+) TRINITY_DN104208_c0_g7:1-1398(+)	1	0.0144745	74.849	EK(1)QQFPISQNK	2	-1.7151	1
TRINITY_DN104272_c6_g2_m.8627	453	K	TRINITY_DN104272_c6_g2|g.8627 ORF TRINITY_DN104272_c6_g2|g.8627 TRINITY_DN104272_c6_g2_m.8627 type:complete len:468 (+) TRINITY_DN104272_c6_g2:93-1496(+)	1	0.0667436	40.386	SAK(1)LVQGQDR	2	0.22973	1
TRINITY_DN104272_c6_g2_m.8627	204	K	TRINITY_DN104272_c6_g2|g.8627 ORF TRINITY_DN104272_c6_g2|g.8627 TRINITY_DN104272_c6_g2_m.8627 type:complete len:468 (+) TRINITY_DN104272_c6_g2:93-1496(+)	1	3.36152e-05	110.58	EK(1)GSLLYTSLTDGK	2	0.59623	1
TRINITY_DN104288_c5_g2_m.8671	191	K	TRINITY_DN104288_c5_g2|g.8671 ORF TRINITY_DN104288_c5_g2|g.8671 TRINITY_DN104288_c5_g2_m.8671 type:complete len:758 (+) TRINITY_DN104288_c5_g2:226-2499(+)	1	0.0122407	74.424	AK(1)SLEVIQYLK	2	-1.9119	1
TRINITY_DN104288_c5_g2_m.8671	321	K	TRINITY_DN104288_c5_g2|g.8671 ORF TRINITY_DN104288_c5_g2|g.8671 TRINITY_DN104288_c5_g2_m.8671 type:complete len:758 (+) TRINITY_DN104288_c5_g2:226-2499(+)	1	0.0271109	41.317	AAEELISNENRPK(1)ETR	2	-2.4519	1
TRINITY_DN104288_c5_g2_m.8671	736	K	TRINITY_DN104288_c5_g2|g.8671 ORF TRINITY_DN104288_c5_g2|g.8671 TRINITY_DN104288_c5_g2_m.8671 type:complete len:758 (+) TRINITY_DN104288_c5_g2:226-2499(+)	1	0.0276498	44.598	AAAHGNSFEK(1)K	2	-1.1173	1
TRINITY_DN104289_c4_g1_m.8672	127	K	TRINITY_DN104289_c4_g1|g.8672 ORF TRINITY_DN104289_c4_g1|g.8672 TRINITY_DN104289_c4_g1_m.8672 type:complete len:252 (+) TRINITY_DN104289_c4_g1:64-819(+)	1	0.00108254	78.043	SLSK(1)TTDDTSGK	2	0.65494	1
TRINITY_DN104289_c4_g1_m.8672	216	K	TRINITY_DN104289_c4_g1|g.8672 ORF TRINITY_DN104289_c4_g1|g.8672 TRINITY_DN104289_c4_g1_m.8672 type:complete len:252 (+) TRINITY_DN104289_c4_g1:64-819(+)	1	1.97581e-07	101.45	VETELGSK(1)MIHLK	2	-2.072	1
TRINITY_DN104289_c4_g1_m.8672	135	K	TRINITY_DN104289_c4_g1|g.8672 ORF TRINITY_DN104289_c4_g1|g.8672 TRINITY_DN104289_c4_g1_m.8672 type:complete len:252 (+) TRINITY_DN104289_c4_g1:64-819(+)	1	2.18934e-26	180.17	TTDDTSGK(1)EALANVFR	2	2.4121	1
TRINITY_DN104293_c0_g1_m.8678	693	K	TRINITY_DN104293_c0_g1|g.8678 ORF TRINITY_DN104293_c0_g1|g.8678 TRINITY_DN104293_c0_g1_m.8678 type:complete len:899 (+) TRINITY_DN104293_c0_g1:252-2948(+)	1	0.000423705	73.655	EKLDDNEEIK(1)K	2	-1.2386	1
TRINITY_DN104293_c0_g1_m.8678	685	K	TRINITY_DN104293_c0_g1|g.8678 ORF TRINITY_DN104293_c0_g1|g.8678 TRINITY_DN104293_c0_g1_m.8678 type:complete len:899 (+) TRINITY_DN104293_c0_g1:252-2948(+)	1	6.51939e-06	112.93	EK(1)LDDNEEIKK	2	-0.48757	1
TRINITY_DN104293_c0_g1_m.8678	795	K	TRINITY_DN104293_c0_g1|g.8678 ORF TRINITY_DN104293_c0_g1|g.8678 TRINITY_DN104293_c0_g1_m.8678 type:complete len:899 (+) TRINITY_DN104293_c0_g1:252-2948(+)	1	0.01661	65.156	VK(1)IWLQDK	2	-2.1868	1
TRINITY_DN104293_c0_g1_m.8678	91	K	TRINITY_DN104293_c0_g1|g.8678 ORF TRINITY_DN104293_c0_g1|g.8678 TRINITY_DN104293_c0_g1_m.8678 type:complete len:899 (+) TRINITY_DN104293_c0_g1:252-2948(+)	1	0.057967	40.386	YPSK(1)VYSQVR	2	-0.44902	1
TRINITY_DN104293_c0_g1_m.8678	801	K	TRINITY_DN104293_c0_g1|g.8678 ORF TRINITY_DN104293_c0_g1|g.8678 TRINITY_DN104293_c0_g1_m.8678 type:complete len:899 (+) TRINITY_DN104293_c0_g1:252-2948(+)	1	0.000788729	90.142	IWLQDK(1)EALQK	2	1.437	1
TRINITY_DN104293_c0_g1_m.8678	813	K	TRINITY_DN104293_c0_g1|g.8678 ORF TRINITY_DN104293_c0_g1|g.8678 TRINITY_DN104293_c0_g1_m.8678 type:complete len:899 (+) TRINITY_DN104293_c0_g1:252-2948(+)	1	0.00088576	73.305	ETSHFIK(1)PAITSEEIYDK	3	-3.0429	1
TRINITY_DN104293_c0_g1_m.8678	806	K	TRINITY_DN104293_c0_g1|g.8678 ORF TRINITY_DN104293_c0_g1|g.8678 TRINITY_DN104293_c0_g1_m.8678 type:complete len:899 (+) TRINITY_DN104293_c0_g1:252-2948(+)	1	1.72783e-07	141.44	EALQK(1)ETSHFIK	2	-2.5971	1
TRINITY_DN104293_c0_g1_m.8678	781	K	TRINITY_DN104293_c0_g1|g.8678 ORF TRINITY_DN104293_c0_g1|g.8678 TRINITY_DN104293_c0_g1_m.8678 type:complete len:899 (+) TRINITY_DN104293_c0_g1:252-2948(+)	1	0.0348693	76.605	NKPWLPK(1)SR	2	-1.3659	1
TRINITY_DN104293_c0_g1_m.8678	735	K	TRINITY_DN104293_c0_g1|g.8678 ORF TRINITY_DN104293_c0_g1|g.8678 TRINITY_DN104293_c0_g1_m.8678 type:complete len:899 (+) TRINITY_DN104293_c0_g1:252-2948(+)	1	0.000427368	80.623	LDSLK(1)AIGDPIFFR	2	-1.7236	1
TRINITY_DN104296_c0_g2_m.8684	158	K	TRINITY_DN104296_c0_g2|g.8684 ORF TRINITY_DN104296_c0_g2|g.8684 TRINITY_DN104296_c0_g2_m.8684 type:complete len:635 (+) TRINITY_DN104296_c0_g2:726-2630(+)	0.999987	0.000131224	73.655	IVQLTK(1)EGQLNKPK	2	-4.2258	1
TRINITY_DN104296_c0_g2_m.8684	143	K	TRINITY_DN104296_c0_g2|g.8684 ORF TRINITY_DN104296_c0_g2|g.8684 TRINITY_DN104296_c0_g2_m.8684 type:complete len:635 (+) TRINITY_DN104296_c0_g2:726-2630(+)	1	0.00186402	64.266	TTK(1)SWEDSTLNK	2	1.1196	1
TRINITY_DN104312_c1_g3_m.8720	412	K	TRINITY_DN104312_c1_g3|g.8720 ORF TRINITY_DN104312_c1_g3|g.8720 TRINITY_DN104312_c1_g3_m.8720 type:5prime_partial len:545 (+) TRINITY_DN104312_c1_g3:2-1636(+)	1	0.0434197	40.203	LEK(1)LQNR	2	1.838	1
TRINITY_DN104344_c3_g4_m.8784	123	K	TRINITY_DN104344_c3_g4|g.8784 ORF TRINITY_DN104344_c3_g4|g.8784 TRINITY_DN104344_c3_g4_m.8784 type:complete len:254 (+) TRINITY_DN104344_c3_g4:161-922(+)	1	0.000860067	82.822	VAYALSQGLK(1)VIACVGETLEQR	3	0.34542	1
TRINITY_DN104344_c3_g4_m.8784	4	K	TRINITY_DN104344_c3_g4|g.8784 ORF TRINITY_DN104344_c3_g4|g.8784 TRINITY_DN104344_c3_g4_m.8784 type:complete len:254 (+) TRINITY_DN104344_c3_g4:161-922(+)	1	8.87846e-08	155.82	K(1)FFVGGNWK	2	-2.5559	1
TRINITY_DN104344_c3_g4_m.8784	21	K	TRINITY_DN104344_c3_g4|g.8784 ORF TRINITY_DN104344_c3_g4|g.8784 TRINITY_DN104344_c3_g4_m.8784 type:complete len:254 (+) TRINITY_DN104344_c3_g4:161-922(+)	1	0.0341801	50.297	CNGTTEEVK(1)K	2	-0.069329	1
TRINITY_DN104344_c3_g4_m.8784	194	K	TRINITY_DN104344_c3_g4|g.8784 ORF TRINITY_DN104344_c3_g4|g.8784 TRINITY_DN104344_c3_g4_m.8784 type:complete len:254 (+) TRINITY_DN104344_c3_g4:161-922(+)	1	1.5005e-18	132.93	WLK(1)ENVSAEVSESTR	2	-1.9703	1
TRINITY_DN104344_c3_g4_m.8784	70	K	TRINITY_DN104344_c3_g4|g.8784 ORF TRINITY_DN104344_c3_g4|g.8784 TRINITY_DN104344_c3_g4_m.8784 type:complete len:254 (+) TRINITY_DN104344_c3_g4:161-922(+)	1	0.000200193	103.87	PDFHVAAQNCWVK(1)K	3	-1.7072	1
TRINITY_DN104344_c3_g4_m.8784	12	K	TRINITY_DN104344_c3_g4|g.8784 ORF TRINITY_DN104344_c3_g4|g.8784 TRINITY_DN104344_c3_g4_m.8784 type:complete len:254 (+) TRINITY_DN104344_c3_g4:161-922(+)	1	1.58301e-19	141.88	FFVGGNWK(1)CNGTTEEVK	2	0.11397	1
TRINITY_DN104344_c3_g4_m.8784	113	K	TRINITY_DN104344_c3_g4|g.8784 ORF TRINITY_DN104344_c3_g4|g.8784 TRINITY_DN104344_c3_g4_m.8784 type:complete len:254 (+) TRINITY_DN104344_c3_g4:161-922(+)	1	0.0180281	41.188	ALLGESNEFVGDK(1)VAYALSQGLK	3	0.64644	1
TRINITY_DN104350_c0_g2_m.8798	356	K	TRINITY_DN104350_c0_g2|g.8798 ORF TRINITY_DN104350_c0_g2|g.8798 TRINITY_DN104350_c0_g2_m.8798 type:5prime_partial len:426 (+) TRINITY_DN104350_c0_g2:3-1280(+)	1	0.0132455	53.028	VEESVGLK(1)PEK	2	0.16155	1
TRINITY_DN104350_c0_g2_m.8798	88	K	TRINITY_DN104350_c0_g2|g.8798 ORF TRINITY_DN104350_c0_g2|g.8798 TRINITY_DN104350_c0_g2_m.8798 type:5prime_partial len:426 (+) TRINITY_DN104350_c0_g2:3-1280(+)	1	8.95094e-05	65.173	ITNSEHLVDLK(1)NK	2	-1.5514	1
TRINITY_DN104350_c0_g2_m.8798	210	K	TRINITY_DN104350_c0_g2|g.8798 ORF TRINITY_DN104350_c0_g2|g.8798 TRINITY_DN104350_c0_g2_m.8798 type:5prime_partial len:426 (+) TRINITY_DN104350_c0_g2:3-1280(+)	1	0.0202001	50.834	LAK(1)CLAESR	2	-2.1183	1
TRINITY_DN104350_c0_g2_m.8798	156	K	TRINITY_DN104350_c0_g2|g.8798 ORF TRINITY_DN104350_c0_g2|g.8798 TRINITY_DN104350_c0_g2_m.8798 type:5prime_partial len:426 (+) TRINITY_DN104350_c0_g2:3-1280(+)	1	0.0100506	62.271	AIQEWGQPK(1)SR	2	-0.72715	1
TRINITY_DN104351_c2_g2_m.8804	271	K	TRINITY_DN104351_c2_g2|g.8804 ORF TRINITY_DN104351_c2_g2|g.8804 TRINITY_DN104351_c2_g2_m.8804 type:complete len:298 (+) TRINITY_DN104351_c2_g2:107-1000(+)	1	0.0130922	69.716	HISK(1)EEVK	2	-1.8093	1
TRINITY_DN104364_c0_g1_m.8841	69	K	TRINITY_DN104364_c0_g1|g.8841 ORF TRINITY_DN104364_c0_g1|g.8841 TRINITY_DN104364_c0_g1_m.8841 type:complete len:143 (+) TRINITY_DN104364_c0_g1:321-749(+)	1	0.0248305	56.89	FFLK(1)LQK	1	2.1057	1
TRINITY_DN104386_c4_g1_m.8899	192	K	TRINITY_DN104386_c4_g1|g.8899 ORF TRINITY_DN104386_c4_g1|g.8899 TRINITY_DN104386_c4_g1_m.8899 type:complete len:300 (+) TRINITY_DN104386_c4_g1:106-1005(+)	1	0.0515795	49.325	AK(1)IGDVVR	2	2.2433	1
TRINITY_DN104387_c0_g1_m.8902	140	K	TRINITY_DN104387_c0_g1|g.8902 ORF TRINITY_DN104387_c0_g1|g.8902 TRINITY_DN104387_c0_g1_m.8902 type:complete len:503 (+) TRINITY_DN104387_c0_g1:39-1547(+)	1	9.02871e-05	97.277	THLLSSQK(1)VK	2	0.033421	1
TRINITY_DN104398_c3_g1_m.8914	325	K	TRINITY_DN104398_c3_g1|g.8914 ORF TRINITY_DN104398_c3_g1|g.8914 TRINITY_DN104398_c3_g1_m.8914 type:complete len:379 (+) TRINITY_DN104398_c3_g1:330-1466(+)	1	0.0172804	63.397	LGWAPTMK(1)LK	2	-3.5475	1
TRINITY_DN104465_c3_g2_m.9064	3495	K	TRINITY_DN104465_c3_g2|g.9064 ORF TRINITY_DN104465_c3_g2|g.9064 TRINITY_DN104465_c3_g2_m.9064 type:complete len:3667 (+) TRINITY_DN104465_c3_g2:248-11248(+)	1	5.49185e-07	110.58	VTEENK(1)HEYVDR	2	-2.3261	1
TRINITY_DN104465_c3_g2_m.9064	538	K	TRINITY_DN104465_c3_g2|g.9064 ORF TRINITY_DN104465_c3_g2|g.9064 TRINITY_DN104465_c3_g2_m.9064 type:complete len:3667 (+) TRINITY_DN104465_c3_g2:248-11248(+)	1	0.0158653	50.09	HDDDYLYSQK(1)R	2	0.26205	1
TRINITY_DN104481_c0_g11_m.9096	81	K	TRINITY_DN104481_c0_g11|g.9096 ORF TRINITY_DN104481_c0_g11|g.9096 TRINITY_DN104481_c0_g11_m.9096 type:internal len:327 (+) TRINITY_DN104481_c0_g11:1-978(+)	1	0.00794218	74.424	VLVK(1)VHPEGK	2	-1.2586	1
TRINITY_DN104481_c0_g11_m.9096	87	K	TRINITY_DN104481_c0_g11|g.9096 ORF TRINITY_DN104481_c0_g11|g.9096 TRINITY_DN104481_c0_g11_m.9096 type:internal len:327 (+) TRINITY_DN104481_c0_g11:1-978(+)	1	0.0011789	76.563	VHPEGK(1)YVVDVDK	2	-1.5769	1
TRINITY_DN104481_c0_g11_m.9096	189	K	TRINITY_DN104481_c0_g11|g.9096 ORF TRINITY_DN104481_c0_g11|g.9096 TRINITY_DN104481_c0_g11_m.9096 type:internal len:327 (+) TRINITY_DN104481_c0_g11:1-978(+)	1	0.000455146	65.12	GVLLYGPPGTGK(1)TLLAR	2	1.9027	2
TRINITY_DN104481_c0_g11_m.9096	31	K	TRINITY_DN104481_c0_g11|g.9096 ORF TRINITY_DN104481_c0_g11|g.9096 TRINITY_DN104481_c0_g11_m.9096 type:internal len:327 (+) TRINITY_DN104481_c0_g11:1-978(+)	1	0.0535475	49.325	QK(1)SHNLNR	2	-1.5535	1
TRINITY_DN104481_c0_g11_m.9096	48	K	TRINITY_DN104481_c0_g11|g.9096 ORF TRINITY_DN104481_c0_g11|g.9096 TRINITY_DN104481_c0_g11_m.9096 type:internal len:327 (+) TRINITY_DN104481_c0_g11:1-978(+)	1	0.000531921	113.14	NDLNAK(1)VR	2	0.7532	1
TRINITY_DN104485_c0_g2_m.9108	1095	K	TRINITY_DN104485_c0_g2|g.9108 ORF TRINITY_DN104485_c0_g2|g.9108 TRINITY_DN104485_c0_g2_m.9108 type:5prime_partial len:1101 (+) TRINITY_DN104485_c0_g2:2-3304(+)	1	0.00701728	44.57	HEYEVK(1)QVSK	2	-1.4697	1
TRINITY_DN104512_c4_g4_m.9166	42	K	TRINITY_DN104512_c4_g4|g.9166 ORF TRINITY_DN104512_c4_g4|g.9166 TRINITY_DN104512_c4_g4_m.9166 type:5prime_partial len:228 (+) TRINITY_DN104512_c4_g4:3-686(+)	1	1.29423e-09	126.17	YGAQVQGITLSPVQAK(1)R	2	0.18218	1
TRINITY_DN104516_c3_g1_m.9174	496	K	TRINITY_DN104516_c3_g1|g.9174 ORF TRINITY_DN104516_c3_g1|g.9174 TRINITY_DN104516_c3_g1_m.9174 type:5prime_partial len:519 (+) TRINITY_DN104516_c3_g1:1-1557(+)	1	3.85348e-11	108.2	LIK(1)GWINEYYQDK	2	2.0504	1
TRINITY_DN104533_c0_g2_m.9214	908	K	TRINITY_DN104533_c0_g2|g.9214 ORF TRINITY_DN104533_c0_g2|g.9214 TRINITY_DN104533_c0_g2_m.9214 type:complete len:962 (+) TRINITY_DN104533_c0_g2:268-3153(+)	1	0.0438614	62.494	LK(1)TTSSNPVSEIDITK	2	-1.8136	1
TRINITY_DN104533_c0_g2_m.9214	175	K	TRINITY_DN104533_c0_g2|g.9214 ORF TRINITY_DN104533_c0_g2|g.9214 TRINITY_DN104533_c0_g2_m.9214 type:complete len:962 (+) TRINITY_DN104533_c0_g2:268-3153(+)	1	0.0318032	41.87	SSLNHDGIFILDTK(1)SK	3	-1.4844	1
TRINITY_DN104533_c0_g2_m.9214	933	K	TRINITY_DN104533_c0_g2|g.9214 ORF TRINITY_DN104533_c0_g2|g.9214 TRINITY_DN104533_c0_g2_m.9214 type:complete len:962 (+) TRINITY_DN104533_c0_g2:268-3153(+)	1	0.00965576	63.212	ETYLSSVEFK(1)EK	2	0.96103	1
TRINITY_DN104533_c0_g2_m.9214	193	K	TRINITY_DN104533_c0_g2|g.9214 ORF TRINITY_DN104533_c0_g2|g.9214 TRINITY_DN104533_c0_g2_m.9214 type:complete len:962 (+) TRINITY_DN104533_c0_g2:268-3153(+)	1	0.0181497	40.386	AK(1)ALEVVQYVK	2	-0.60429	1
TRINITY_DN104565_c0_g2_m.9292	176	K	TRINITY_DN104565_c0_g2|g.9292 ORF TRINITY_DN104565_c0_g2|g.9292 TRINITY_DN104565_c0_g2_m.9292 type:complete len:194 (+) TRINITY_DN104565_c0_g2:307-888(+)	1	0.00439286	62.705	ASVHAK(1)IETDR	2	0.83709	1
TRINITY_DN104567_c6_g1_m.9296	285	K	TRINITY_DN104567_c6_g1|g.9296 ORF TRINITY_DN104567_c6_g1|g.9296 TRINITY_DN104567_c6_g1_m.9296 type:complete len:834 (+) TRINITY_DN104567_c6_g1:504-3005(+)	1	0.00632716	68.49	ENK(1)DLDLPAHK	2	-0.75336	1
TRINITY_DN104582_c0_g1_m.9329	291	K	TRINITY_DN104582_c0_g1|g.9329 ORF TRINITY_DN104582_c0_g1|g.9329 TRINITY_DN104582_c0_g1_m.9329 type:complete len:752 (+) TRINITY_DN104582_c0_g1:97-2352(+)	1	0.0141185	75.243	VK(1)LDVQK	2	0.25515	1
TRINITY_DN104627_c3_g3_m.9418	109	K	TRINITY_DN104627_c3_g3|g.9418 ORF TRINITY_DN104627_c3_g3|g.9418 TRINITY_DN104627_c3_g3_m.9418 type:complete len:256 (+) TRINITY_DN104627_c3_g3:442-1209(+)	1	0.0170451	44.42	SEFYK(1)NK	2	0.22955	1
TRINITY_DN104627_c3_g3_m.9418	111	K	TRINITY_DN104627_c3_g3|g.9418 ORF TRINITY_DN104627_c3_g3|g.9418 TRINITY_DN104627_c3_g3_m.9418 type:complete len:256 (+) TRINITY_DN104627_c3_g3:442-1209(+)	1	5.41916e-08	126.17	NK(1)FGSTQYEHIISR	2	-1.3617	1
TRINITY_DN104627_c3_g3_m.9418	218	K	TRINITY_DN104627_c3_g3|g.9418 ORF TRINITY_DN104627_c3_g3|g.9418 TRINITY_DN104627_c3_g3_m.9418 type:complete len:256 (+) TRINITY_DN104627_c3_g3:442-1209(+)	1	0.0182971	43.306	EVNEELEK(1)YSSR	2	1.5493	1
TRINITY_DN104654_c1_g1_m.9481	356	K	TRINITY_DN104654_c1_g1|g.9481 ORF TRINITY_DN104654_c1_g1|g.9481 TRINITY_DN104654_c1_g1_m.9481 type:complete len:404 (+) TRINITY_DN104654_c1_g1:206-1417(+)	1	0.013731	60.547	AVK(1)EIEPALK	2	-0.16879	1
TRINITY_DN104654_c1_g1_m.9481	251	K	TRINITY_DN104654_c1_g1|g.9481 ORF TRINITY_DN104654_c1_g1|g.9481 TRINITY_DN104654_c1_g1_m.9481 type:complete len:404 (+) TRINITY_DN104654_c1_g1:206-1417(+)	1	3.0874e-09	98.895	VGGGIYTK(1)AADVGADLVGK	2	2.0609	1
TRINITY_DN104654_c1_g1_m.9481	363	K	TRINITY_DN104654_c1_g1|g.9481 ORF TRINITY_DN104654_c1_g1|g.9481 TRINITY_DN104654_c1_g1_m.9481 type:complete len:404 (+) TRINITY_DN104654_c1_g1:206-1417(+)	1	0.00952276	89.123	EIEPALK(1)R	2	-0.55017	1
TRINITY_DN104654_c1_g1_m.9481	37	K	TRINITY_DN104654_c1_g1|g.9481 ORF TRINITY_DN104654_c1_g1|g.9481 TRINITY_DN104654_c1_g1_m.9481 type:complete len:404 (+) TRINITY_DN104654_c1_g1:206-1417(+)	1	0.0470472	53.679	VK(1)VAPER	2	0.26096	1
TRINITY_DN104654_c1_g1_m.9481	129	K	TRINITY_DN104654_c1_g1|g.9481 ORF TRINITY_DN104654_c1_g1|g.9481 TRINITY_DN104654_c1_g1_m.9481 type:complete len:404 (+) TRINITY_DN104654_c1_g1:206-1417(+)	1	0.0171015	47.561	EQPCTYSK(1)DK	2	0.37813	1
TRINITY_DN104654_c1_g1_m.9481	262	K	TRINITY_DN104654_c1_g1|g.9481 ORF TRINITY_DN104654_c1_g1|g.9481 TRINITY_DN104654_c1_g1_m.9481 type:complete len:404 (+) TRINITY_DN104654_c1_g1:206-1417(+)	1	8.3037e-12	179.98	AADVGADLVGK(1)VER	2	3.6206	2
TRINITY_DN104654_c1_g1_m.9482	327	K	TRINITY_DN104654_c1_g1|g.9482 ORF TRINITY_DN104654_c1_g1|g.9482 TRINITY_DN104654_c1_g1_m.9482 type:complete len:377 (+) TRINITY_DN104654_c1_g1:1457-2587(+)	1	7.51457e-05	80.049	GSDPHK(1)AAVIGDTIGDPLK	2	-3.0721	2
TRINITY_DN104654_c1_g1_m.9482	213	K	TRINITY_DN104654_c1_g1|g.9482 ORF TRINITY_DN104654_c1_g1|g.9482 TRINITY_DN104654_c1_g1_m.9482 type:complete len:377 (+) TRINITY_DN104654_c1_g1:1457-2587(+)	1	3.43523e-05	110.58	SVGSAALK(1)MVEEVR	2	-2.387	1
TRINITY_DN104654_c1_g1_m.9482	177	K	TRINITY_DN104654_c1_g1|g.9482 ORF TRINITY_DN104654_c1_g1|g.9482 TRINITY_DN104654_c1_g1_m.9482 type:complete len:377 (+) TRINITY_DN104654_c1_g1:1457-2587(+)	1	0.000112306	108.24	AAISK(1)VDVLTPK	2	-0.12753	1
TRINITY_DN104654_c1_g1_m.9482	316	K	TRINITY_DN104654_c1_g1|g.9482 ORF TRINITY_DN104654_c1_g1|g.9482 TRINITY_DN104654_c1_g1_m.9482 type:complete len:377 (+) TRINITY_DN104654_c1_g1:1457-2587(+)	1	8.04258e-13	156.02	YIEAGVSEHAK(1)SLGPK	2	-3.8186	1
TRINITY_DN104656_c0_g7_m.9485	395	K	TRINITY_DN104656_c0_g7|g.9485 ORF TRINITY_DN104656_c0_g7|g.9485 TRINITY_DN104656_c0_g7_m.9485 type:5prime_partial len:412 (+) TRINITY_DN104656_c0_g7:1-1236(+)	1	0.000110059	94.66	MADVEGLEAHK(1)R	2	-1.6858	1
TRINITY_DN104664_c0_g27_m.9515	23	K	TRINITY_DN104664_c0_g27|g.9515 ORF TRINITY_DN104664_c0_g27|g.9515 TRINITY_DN104664_c0_g27_m.9515 type:internal len:133 (+) TRINITY_DN104664_c0_g27:3-398(+)	1	1.63809e-05	108.92	EHELLK(1)K	2	0.71735	1
TRINITY_DN104664_c0_g27_m.9515	17	K	TRINITY_DN104664_c0_g27|g.9515 ORF TRINITY_DN104664_c0_g27|g.9515 TRINITY_DN104664_c0_g27_m.9515 type:internal len:133 (+) TRINITY_DN104664_c0_g27:3-398(+)	1	3.0423e-15	169.81	TTVLPK(1)EHELLK	2	-1.2032	1
TRINITY_DN104664_c0_g9_m.9517	116	K	TRINITY_DN104664_c0_g9|g.9517 ORF TRINITY_DN104664_c0_g9|g.9517 TRINITY_DN104664_c0_g9_m.9517 type:5prime_partial len:142 (+) TRINITY_DN104664_c0_g9:3-428(+)	1	0.00285976	74.849	FNEK(1)LAADTR	2	0.56703	1
TRINITY_DN104664_c0_g9_m.9517	26	K	TRINITY_DN104664_c0_g9|g.9517 ORF TRINITY_DN104664_c0_g9|g.9517 TRINITY_DN104664_c0_g9_m.9517 type:5prime_partial len:142 (+) TRINITY_DN104664_c0_g9:3-428(+)	1	2.77418e-15	124.69	EAGVEHK(1)IDFIESDAVPALDK	3	2.7312	1
TRINITY_DN104669_c0_g1_m.9525	398	K	TRINITY_DN104669_c0_g1|g.9525 ORF TRINITY_DN104669_c0_g1|g.9525 TRINITY_DN104669_c0_g1_m.9525 type:5prime_partial len:792 (+) TRINITY_DN104669_c0_g1:3-2378(+)	1	3.16574e-39	206.73	ALAGQK(1)DEAFFSANAAAQASR	3	3.33	2
TRINITY_DN104669_c0_g1_m.9525	53	K	TRINITY_DN104669_c0_g1|g.9525 ORF TRINITY_DN104669_c0_g1|g.9525 TRINITY_DN104669_c0_g1_m.9525 type:5prime_partial len:792 (+) TRINITY_DN104669_c0_g1:3-2378(+)	1	8.84616e-14	120.21	FALESFWDGK(1)STAEDLQK	2	2.6062	1
TRINITY_DN104669_c0_g1_m.9525	770	K	TRINITY_DN104669_c0_g1|g.9525 ORF TRINITY_DN104669_c0_g1|g.9525 TRINITY_DN104669_c0_g1_m.9525 type:5prime_partial len:792 (+) TRINITY_DN104669_c0_g1:3-2378(+)	1	0.00820695	47.915	YAEVK(1)PALTNMVAAAK	2	0.72403	1
TRINITY_DN104669_c0_g1_m.9525	347	K	TRINITY_DN104669_c0_g1|g.9525 ORF TRINITY_DN104669_c0_g1|g.9525 TRINITY_DN104669_c0_g1_m.9525 type:5prime_partial len:792 (+) TRINITY_DN104669_c0_g1:3-2378(+)	1	1.63759e-07	85.443	DK(1)LVVSTSSSLLHTAVDLVNETK	3	0.3403	1
TRINITY_DN104669_c0_g1_m.9525	167	K	TRINITY_DN104669_c0_g1|g.9525 ORF TRINITY_DN104669_c0_g1|g.9525 TRINITY_DN104669_c0_g1_m.9525 type:5prime_partial len:792 (+) TRINITY_DN104669_c0_g1:3-2378(+)	1	0.0134363	83.623	AVSEYK(1)EAK	2	1.2245	1
TRINITY_DN104669_c0_g1_m.9525	72	K	TRINITY_DN104669_c0_g1|g.9525 ORF TRINITY_DN104669_c0_g1|g.9525 TRINITY_DN104669_c0_g1_m.9525 type:5prime_partial len:792 (+) TRINITY_DN104669_c0_g1:3-2378(+)	1	3.12222e-11	143.22	SSIWK(1)QMADAGIK	2	-1.3976	1
TRINITY_DN104669_c0_g1_m.9525	494	K	TRINITY_DN104669_c0_g1|g.9525 ORF TRINITY_DN104669_c0_g1|g.9525 TRINITY_DN104669_c0_g1_m.9525 type:5prime_partial len:792 (+) TRINITY_DN104669_c0_g1:3-2378(+)	1	1.36201e-08	128.46	ISEEAYVNAIK(1)EEINK	2	2.4076	2
TRINITY_DN104669_c0_g1_m.9525	161	K	TRINITY_DN104669_c0_g1|g.9525 ORF TRINITY_DN104669_c0_g1|g.9525 TRINITY_DN104669_c0_g1_m.9525 type:5prime_partial len:792 (+) TRINITY_DN104669_c0_g1:3-2378(+)	1	8.53619e-17	176.97	FSYASHK(1)AVSEYK	2	-1.8248	2
TRINITY_DN104669_c0_g1_m.9525	426	K	TRINITY_DN104669_c0_g1|g.9525 ORF TRINITY_DN104669_c0_g1|g.9525 TRINITY_DN104669_c0_g1_m.9525 type:5prime_partial len:792 (+) TRINITY_DN104669_c0_g1:3-2378(+)	1	0.000895098	42.061	VTNPEVQK(1)AAAALK	2	-2.7786	1
TRINITY_DN104669_c0_g1_m.9525	704	K	TRINITY_DN104669_c0_g1|g.9525 ORF TRINITY_DN104669_c0_g1|g.9525 TRINITY_DN104669_c0_g1_m.9525 type:5prime_partial len:792 (+) TRINITY_DN104669_c0_g1:3-2378(+)	1	2.62369e-06	151.22	SDEK(1)LLSVFR	2	-1.0116	1
TRINITY_DN104669_c0_g1_m.9525	61	K	TRINITY_DN104669_c0_g1|g.9525 ORF TRINITY_DN104669_c0_g1|g.9525 TRINITY_DN104669_c0_g1_m.9525 type:5prime_partial len:792 (+) TRINITY_DN104669_c0_g1:3-2378(+)	1	2.37109e-09	124.06	STAEDLQK(1)VSADLR	2	-1.0037	1
TRINITY_DN104669_c0_g1_m.9525	374	K	TRINITY_DN104669_c0_g1|g.9525 ORF TRINITY_DN104669_c0_g1|g.9525 TRINITY_DN104669_c0_g1_m.9525 type:5prime_partial len:792 (+) TRINITY_DN104669_c0_g1:3-2378(+)	1	0.0113618	68.548	LDDEIK(1)SWLAFAAQK	3	1.9501	1
TRINITY_DN104669_c0_g1_m.9525	714	K	TRINITY_DN104669_c0_g1|g.9525 ORF TRINITY_DN104669_c0_g1|g.9525 TRINITY_DN104669_c0_g1_m.9525 type:5prime_partial len:792 (+) TRINITY_DN104669_c0_g1:3-2378(+)	1	1.92384e-05	65.724	EGVK(1)YGAGIGPGVYDIHSPR	3	-3.1046	1
TRINITY_DN104669_c0_g1_m.9525	451	K	TRINITY_DN104669_c0_g1|g.9525 ORF TRINITY_DN104669_c0_g1|g.9525 TRINITY_DN104669_c0_g1_m.9525 type:5prime_partial len:792 (+) TRINITY_DN104669_c0_g1:3-2378(+)	1	0.00547413	93.561	LDAQQK(1)K	2	-0.57356	1
TRINITY_DN104669_c0_g1_m.9525	499	K	TRINITY_DN104669_c0_g1|g.9525 ORF TRINITY_DN104669_c0_g1|g.9525 TRINITY_DN104669_c0_g1_m.9525 type:5prime_partial len:792 (+) TRINITY_DN104669_c0_g1:3-2378(+)	1	0.00330333	89.123	EEINK(1)VVK	2	0.22477	1
TRINITY_DN104669_c0_g1_m.9525	432	K	TRINITY_DN104669_c0_g1|g.9525 ORF TRINITY_DN104669_c0_g1|g.9525 TRINITY_DN104669_c0_g1_m.9525 type:5prime_partial len:792 (+) TRINITY_DN104669_c0_g1:3-2378(+)	1	8.22144e-11	183	AAAALK(1)GSDHR	2	0.47642	1
TRINITY_DN104669_c0_g1_m.9525	781	K	TRINITY_DN104669_c0_g1|g.9525 ORF TRINITY_DN104669_c0_g1|g.9525 TRINITY_DN104669_c0_g1_m.9525 type:5prime_partial len:792 (+) TRINITY_DN104669_c0_g1:3-2378(+)	1	1.06243e-09	131.54	PALTNMVAAAK(1)QLR	2	0.3283	2
TRINITY_DN104679_c0_g1_m.9548	663	K	TRINITY_DN104679_c0_g1|g.9548 ORF TRINITY_DN104679_c0_g1|g.9548 TRINITY_DN104679_c0_g1_m.9548 type:5prime_partial len:975 (+) TRINITY_DN104679_c0_g1:2-2926(+)	1	2.73652e-07	87.573	FPHPYPQLAQLQK(1)EMVR	3	-3.6497	1
TRINITY_DN104686_c0_g1_m.9558	94	K	TRINITY_DN104686_c0_g1|g.9558 ORF TRINITY_DN104686_c0_g1|g.9558 TRINITY_DN104686_c0_g1_m.9558 type:complete len:288 (+) TRINITY_DN104686_c0_g1:85-948(+)	1	1.0446e-07	103.76	AIGEGVGATDETK(1)R	2	-0.65385	1
TRINITY_DN104708_c1_g1_m.9594	359	K	TRINITY_DN104708_c1_g1|g.9594 ORF TRINITY_DN104708_c1_g1|g.9594 TRINITY_DN104708_c1_g1_m.9594 type:5prime_partial len:498 (+) TRINITY_DN104708_c1_g1:3-1496(+)	1	7.04992e-08	126.21	ETVGFNEYYK(1)EEER	2	-0.70624	1
TRINITY_DN104708_c1_g1_m.9594	106	K	TRINITY_DN104708_c1_g1|g.9594 ORF TRINITY_DN104708_c1_g1|g.9594 TRINITY_DN104708_c1_g1_m.9594 type:5prime_partial len:498 (+) TRINITY_DN104708_c1_g1:3-1496(+)	1	1.58462e-05	49.718	LLESPGIHQGPVCHDALSAK(1)LIER	3	4.3553	1
TRINITY_DN104708_c1_g1_m.9594	428	K	TRINITY_DN104708_c1_g1|g.9594 ORF TRINITY_DN104708_c1_g1|g.9594 TRINITY_DN104708_c1_g1_m.9594 type:5prime_partial len:498 (+) TRINITY_DN104708_c1_g1:3-1496(+)	1	0.00168537	85.622	LK(1)VTGNNGVEK	2	-1.1039	1
TRINITY_DN104730_c3_g5_m.9631	246	K	TRINITY_DN104730_c3_g5|g.9631 ORF TRINITY_DN104730_c3_g5|g.9631 TRINITY_DN104730_c3_g5_m.9631 type:5prime_partial len:555 (+) TRINITY_DN104730_c3_g5:3-1667(+)	1	0.00778251	51.531	AASDFDEK(1)QLQR	2	0.79855	1
TRINITY_DN104730_c3_g5_m.9631	467	K	TRINITY_DN104730_c3_g5|g.9631 ORF TRINITY_DN104730_c3_g5|g.9631 TRINITY_DN104730_c3_g5_m.9631 type:5prime_partial len:555 (+) TRINITY_DN104730_c3_g5:3-1667(+)	1	1.66132e-24	152.23	FLATEK(1)EMNDLYLR	2	2.5024	1
TRINITY_DN104730_c3_g5_m.9631	382	K	TRINITY_DN104730_c3_g5|g.9631 ORF TRINITY_DN104730_c3_g5|g.9631 TRINITY_DN104730_c3_g5_m.9631 type:5prime_partial len:555 (+) TRINITY_DN104730_c3_g5:3-1667(+)	1	2.24419e-24	210.4	IAQQELDDVIGK(1)HR	2	-3.6241	2
TRINITY_DN104730_c3_g5_m.9631	458	K	TRINITY_DN104730_c3_g5|g.9631 ORF TRINITY_DN104730_c3_g5|g.9631 TRINITY_DN104730_c3_g5_m.9631 type:5prime_partial len:555 (+) TRINITY_DN104730_c3_g5:3-1667(+)	1	0.000129696	65.408	DPHFWGEDAEEFK(1)PER	3	-1.2142	1
TRINITY_DN104761_c0_g11_m.9704	172	K	TRINITY_DN104761_c0_g11|g.9704 ORF TRINITY_DN104761_c0_g11|g.9704 TRINITY_DN104761_c0_g11_m.9704 type:internal len:199 (+) TRINITY_DN104761_c0_g11:1-594(+)	1	0.00621533	75.474	SGGAK(1)FDGTAK	2	1.7476	1
TRINITY_DN104761_c0_g11_m.9704	56	K	TRINITY_DN104761_c0_g11|g.9704 ORF TRINITY_DN104761_c0_g11|g.9704 TRINITY_DN104761_c0_g11_m.9704 type:internal len:199 (+) TRINITY_DN104761_c0_g11:1-594(+)	1	3.71415e-14	113.86	HVEVPIPSPK(1)K	2	-1.1528	2
TRINITY_DN104761_c0_g12_m.9706	25	K	TRINITY_DN104761_c0_g12|g.9706 ORF TRINITY_DN104761_c0_g12|g.9706 TRINITY_DN104761_c0_g12_m.9706 type:internal len:110 (+) TRINITY_DN104761_c0_g12:1-327(+)	0.978675	0.000499039	89.923	K(0.021)DEILLK(0.979)LEAASINPADWK	3	4.4148	1
TRINITY_DN104761_c0_g12_m.9706	18	K	TRINITY_DN104761_c0_g12|g.9706 ORF TRINITY_DN104761_c0_g12|g.9706 TRINITY_DN104761_c0_g12_m.9706 type:internal len:110 (+) TRINITY_DN104761_c0_g12:1-327(+)	1	3.2812e-06	96.957	HVEVPIPSPK(1)K	2	-1.1528	2
TRINITY_DN104761_c0_g12_m.9706	71	K	TRINITY_DN104761_c0_g12|g.9706 ORF TRINITY_DN104761_c0_g12|g.9706 TRINITY_DN104761_c0_g12_m.9706 type:internal len:110 (+) TRINITY_DN104761_c0_g12:1-327(+)	1	6.07927e-07	86.952	FPFIPVSDAAGEVADVGSAVK(1)DFK	3	3.6716	1
TRINITY_DN104761_c0_g19_m.9708	52	K	TRINITY_DN104761_c0_g19|g.9708 ORF TRINITY_DN104761_c0_g19|g.9708 TRINITY_DN104761_c0_g19_m.9708 type:5prime_partial len:175 (+) TRINITY_DN104761_c0_g19:1-525(+)	1	1.17714e-13	122.2	SLGADEVLDYK(1)SSDGAK	2	-0.50638	1
TRINITY_DN104761_c0_g19_m.9708	148	K	TRINITY_DN104761_c0_g19|g.9708 ORF TRINITY_DN104761_c0_g19|g.9708 TRINITY_DN104761_c0_g19_m.9708 type:5prime_partial len:175 (+) TRINITY_DN104761_c0_g19:1-525(+)	1	0.0145694	45.939	TVVDSK(1)YPLSK	2	-1.9737	1
TRINITY_DN104761_c0_g19_m.9708	114	K	TRINITY_DN104761_c0_g19|g.9708 ORF TRINITY_DN104761_c0_g19|g.9708 TRINITY_DN104761_c0_g19_m.9708 type:5prime_partial len:175 (+) TRINITY_DN104761_c0_g19:1-525(+)	1	0.0126637	109.36	KLTFAK(1)K	2	-0.92088	1
TRINITY_DN104761_c0_g19_m.9708	160	K	TRINITY_DN104761_c0_g19|g.9708 ORF TRINITY_DN104761_c0_g19|g.9708 TRINITY_DN104761_c0_g19_m.9708 type:5prime_partial len:175 (+) TRINITY_DN104761_c0_g19:1-525(+)	1	7.14606e-19	209.7	AEEAWAK(1)SIDGHATGK	2	-3.5832	3
TRINITY_DN104761_c0_g19_m.9708	58	K	TRINITY_DN104761_c0_g19|g.9708 ORF TRINITY_DN104761_c0_g19|g.9708 TRINITY_DN104761_c0_g19_m.9708 type:5prime_partial len:175 (+) TRINITY_DN104761_c0_g19:1-525(+)	1	5.09965e-16	152.23	SSDGAK(1)LNSPSGK	2	1.6169	1
TRINITY_DN104761_c0_g21_m.9710	67	K	TRINITY_DN104761_c0_g21|g.9710 ORF TRINITY_DN104761_c0_g21|g.9710 TRINITY_DN104761_c0_g21_m.9710 type:internal len:109 (+) TRINITY_DN104761_c0_g21:1-324(+)	1	3.14808e-06	98.167	SLGADEVLDYK(1)SPDGAK	2	-1.7496	2
TRINITY_DN104794_c8_g2_m.9785	6	K	TRINITY_DN104794_c8_g2|g.9785 ORF TRINITY_DN104794_c8_g2|g.9785 TRINITY_DN104794_c8_g2_m.9785 type:complete len:320 (+) TRINITY_DN104794_c8_g2:268-1227(+)	1	5.41916e-08	131.54	VDLGK(1)IEHSHLPIR	3	-4.4655	3
TRINITY_DN104794_c8_g2_m.9785	109	K	TRINITY_DN104794_c8_g2|g.9785 ORF TRINITY_DN104794_c8_g2|g.9785 TRINITY_DN104794_c8_g2_m.9785 type:complete len:320 (+) TRINITY_DN104794_c8_g2:268-1227(+)	1	0.000161139	88.42	AFLISK(1)DFGAFPAYHFAIR	3	0.73894	1
TRINITY_DN104794_c8_g2_m.9785	173	K	TRINITY_DN104794_c8_g2|g.9785 ORF TRINITY_DN104794_c8_g2|g.9785 TRINITY_DN104794_c8_g2_m.9785 type:complete len:320 (+) TRINITY_DN104794_c8_g2:268-1227(+)	1	0.0129431	84.368	YDAK(1)TVVR	2	-0.37549	1
TRINITY_DN104794_c8_g2_m.9785	282	K	TRINITY_DN104794_c8_g2|g.9785 ORF TRINITY_DN104794_c8_g2|g.9785 TRINITY_DN104794_c8_g2_m.9785 type:complete len:320 (+) TRINITY_DN104794_c8_g2:268-1227(+)	1	0.0631575	52.591	K(1)FIPNLELK	2	0.12091	1
TRINITY_DN104794_c8_g2_m.9785	267	K	TRINITY_DN104794_c8_g2|g.9785 ORF TRINITY_DN104794_c8_g2|g.9785 TRINITY_DN104794_c8_g2_m.9785 type:complete len:320 (+) TRINITY_DN104794_c8_g2:268-1227(+)	1	0.0125464	44.82	DYVIK(1)FPGIGEYVR	2	-3.7233	1
TRINITY_DN104794_c8_g2_m.9785	316	K	TRINITY_DN104794_c8_g2|g.9785 ORF TRINITY_DN104794_c8_g2|g.9785 TRINITY_DN104794_c8_g2_m.9785 type:complete len:320 (+) TRINITY_DN104794_c8_g2:268-1227(+)	1	2.47702e-05	48.945	FLPEGSHFVHEQNPEEVNELILDFLK(1)R	4	1.3526	1
TRINITY_DN104800_c1_g4_m.9810	21	K	TRINITY_DN104800_c1_g4|g.9810 ORF TRINITY_DN104800_c1_g4|g.9810 TRINITY_DN104800_c1_g4_m.9810 type:5prime_partial len:377 (+) TRINITY_DN104800_c1_g4:3-1133(+)	1	0.0172747	53.679	IPLLK(1)PYK	2	-2.7211	1
TRINITY_DN104819_c0_g1_m.9882	105	K	TRINITY_DN104819_c0_g1|g.9882 ORF TRINITY_DN104819_c0_g1|g.9882 TRINITY_DN104819_c0_g1_m.9882 type:5prime_partial len:127 (+) TRINITY_DN104819_c0_g1:1-381(+)	1	0.000646519	71.219	HQEELK(1)DTVLNK	2	1.105	1
TRINITY_DN104822_c1_g3_m.9885	127	K	TRINITY_DN104822_c1_g3|g.9885 ORF TRINITY_DN104822_c1_g3|g.9885 TRINITY_DN104822_c1_g3_m.9885 type:complete len:228 (+) TRINITY_DN104822_c1_g3:1473-2156(+)	1	2.59703e-08	153.25	ALEATNMSK(1)LVDR	2	0.73577	1
TRINITY_DN104822_c1_g3_m.9885	95	K	TRINITY_DN104822_c1_g3|g.9885 ORF TRINITY_DN104822_c1_g3|g.9885 TRINITY_DN104822_c1_g3_m.9885 type:complete len:228 (+) TRINITY_DN104822_c1_g3:1473-2156(+)	1	0.0597989	50.834	HFEPYGK(1)LVNVR	2	0.21206	1
TRINITY_DN104827_c0_g10_m.9903	137	K	TRINITY_DN104827_c0_g10|g.9903 ORF TRINITY_DN104827_c0_g10|g.9903 TRINITY_DN104827_c0_g10_m.9903 type:internal len:221 (+) TRINITY_DN104827_c0_g10:3-662(+)	1	1.46894e-08	95.677	ISK(1)HEVITLSPSDSDK	2	-2.1819	2
TRINITY_DN104833_c0_g5_m.9927	248	K	TRINITY_DN104833_c0_g5|g.9927 ORF TRINITY_DN104833_c0_g5|g.9927 TRINITY_DN104833_c0_g5_m.9927 type:complete len:491 (+) TRINITY_DN104833_c0_g5:74-1546(+)	1	0.0154106	42.061	NEK(1)LQWFLDTIK	2	0.52572	1
TRINITY_DN104843_c0_g1_m.9949	226	K	TRINITY_DN104843_c0_g1|g.9949 ORF TRINITY_DN104843_c0_g1|g.9949 TRINITY_DN104843_c0_g1_m.9949 type:complete len:296 (+) TRINITY_DN104843_c0_g1:133-1020(+)	1	0.00610583	53.878	GAK(1)VVTDR	2	1.6473	1
TRINITY_DN104872_c1_g1_m.10030	307	K	TRINITY_DN104872_c1_g1|g.10030 ORF TRINITY_DN104872_c1_g1|g.10030 TRINITY_DN104872_c1_g1_m.10030 type:complete len:312 (+) TRINITY_DN104872_c1_g1:64-999(+)	1	0.0077708	61.48	VVAEIQK(1)AFR	2	-2.6329	1
TRINITY_DN104872_c1_g1_m.10030	223	K	TRINITY_DN104872_c1_g1|g.10030 ORF TRINITY_DN104872_c1_g1|g.10030 TRINITY_DN104872_c1_g1_m.10030 type:complete len:312 (+) TRINITY_DN104872_c1_g1:64-999(+)	1	0.00322157	47.844	SVLSPTAVAVTVDCGK(1)EGDVK	2	-1.0033	1
TRINITY_DN104929_c0_g1_m.10154	428	K	TRINITY_DN104929_c0_g1|g.10154 ORF TRINITY_DN104929_c0_g1|g.10154 TRINITY_DN104929_c0_g1_m.10154 type:3prime_partial len:437 (+) TRINITY_DN104929_c0_g1:221-1528(+)	1	0.000114225	119.07	FVGPDGAK(1)LLR	2	-0.32798	1
TRINITY_DN104929_c0_g1_m.10154	118	K	TRINITY_DN104929_c0_g1|g.10154 ORF TRINITY_DN104929_c0_g1|g.10154 TRINITY_DN104929_c0_g1_m.10154 type:3prime_partial len:437 (+) TRINITY_DN104929_c0_g1:221-1528(+)	1	1.9173e-13	104.86	DVFTGTYMPSTK(1)LTGGYR	2	-0.23088	1
TRINITY_DN104929_c0_g1_m.10154	138	K	TRINITY_DN104929_c0_g1|g.10154 ORF TRINITY_DN104929_c0_g1|g.10154 TRINITY_DN104929_c0_g1_m.10154 type:3prime_partial len:437 (+) TRINITY_DN104929_c0_g1:221-1528(+)	1	5.6771e-13	137.58	VCSYLDPSEPSHTK(1)VK	2	-3.7419	2
TRINITY_DN104929_c0_g1_m.10154	213	K	TRINITY_DN104929_c0_g1|g.10154 ORF TRINITY_DN104929_c0_g1|g.10154 TRINITY_DN104929_c0_g1_m.10154 type:3prime_partial len:437 (+) TRINITY_DN104929_c0_g1:221-1528(+)	1	2.07368e-31	220.17	SPSDVGAAGLQK(1)K	2	-0.73554	1
TRINITY_DN104929_c0_g1_m.10154	102	K	TRINITY_DN104929_c0_g1|g.10154 ORF TRINITY_DN104929_c0_g1|g.10154 TRINITY_DN104929_c0_g1_m.10154 type:3prime_partial len:437 (+) TRINITY_DN104929_c0_g1:221-1528(+)	1	0.0011184	75.474	SFPILFDTSK(1)VEK	2	-0.53939	1
TRINITY_DN104929_c0_g1_m.10154	51	K	TRINITY_DN104929_c0_g1|g.10154 ORF TRINITY_DN104929_c0_g1|g.10154 TRINITY_DN104929_c0_g1_m.10154 type:3prime_partial len:437 (+) TRINITY_DN104929_c0_g1:221-1528(+)	1	0.00122804	106	LDYYYFK(1)GHDK	2	-2.6225	1
TRINITY_DN104929_c0_g1_m.10154	92	K	TRINITY_DN104929_c0_g1|g.10154 ORF TRINITY_DN104929_c0_g1|g.10154 TRINITY_DN104929_c0_g1_m.10154 type:3prime_partial len:437 (+) TRINITY_DN104929_c0_g1:221-1528(+)	1	2.72983e-06	70.552	VIAVLDAK(1)SFPILFDTSK	2	3.8792	1
TRINITY_DN104929_c0_g1_m.10154	60	K	TRINITY_DN104929_c0_g1|g.10154 ORF TRINITY_DN104929_c0_g1|g.10154 TRINITY_DN104929_c0_g1_m.10154 type:3prime_partial len:437 (+) TRINITY_DN104929_c0_g1:221-1528(+)	1	4.21509e-34	194.83	FFQSK(1)IDQYSSTVFR	2	3.9016	1
TRINITY_DN104929_c0_g1_m.10154	375	K	TRINITY_DN104929_c0_g1|g.10154 ORF TRINITY_DN104929_c0_g1|g.10154 TRINITY_DN104929_c0_g1_m.10154 type:3prime_partial len:437 (+) TRINITY_DN104929_c0_g1:221-1528(+)	1	0.000270765	86.243	IDPPVEFQYAHAK(1)K	2	-3.5774	1
TRINITY_DN104929_c0_g1_m.10154	201	K	TRINITY_DN104929_c0_g1|g.10154 ORF TRINITY_DN104929_c0_g1|g.10154 TRINITY_DN104929_c0_g1_m.10154 type:3prime_partial len:437 (+) TRINITY_DN104929_c0_g1:221-1528(+)	1	0.00013035	109.47	AYFGK(1)SPSDVGAAGLQK	2	-4.1382	1
TRINITY_DN104929_c0_g1_m.10154	376	K	TRINITY_DN104929_c0_g1|g.10154 ORF TRINITY_DN104929_c0_g1|g.10154 TRINITY_DN104929_c0_g1_m.10154 type:3prime_partial len:437 (+) TRINITY_DN104929_c0_g1:221-1528(+)	1	1.03458e-12	128.46	K(1)DFLLQSHDAQFQVR	3	-3.0167	1
TRINITY_DN104929_c0_g1_m.10154	256	K	TRINITY_DN104929_c0_g1|g.10154 ORF TRINITY_DN104929_c0_g1|g.10154 TRINITY_DN104929_c0_g1_m.10154 type:3prime_partial len:437 (+) TRINITY_DN104929_c0_g1:221-1528(+)	1	0.000894829	63.947	LVEDFLLHTFALPSFIAK(1)PGYK	3	1.122	1
TRINITY_DN104929_c0_g1_m.10154	151	K	TRINITY_DN104929_c0_g1|g.10154 ORF TRINITY_DN104929_c0_g1|g.10154 TRINITY_DN104929_c0_g1_m.10154 type:3prime_partial len:437 (+) TRINITY_DN104929_c0_g1:221-1528(+)	1	0.0060762	76.605	K(1)DYFLPAFR	2	0.36491	1
TRINITY_DN104929_c0_g1_m.10154	148	K	TRINITY_DN104929_c0_g1|g.10154 ORF TRINITY_DN104929_c0_g1|g.10154 TRINITY_DN104929_c0_g1_m.10154 type:3prime_partial len:437 (+) TRINITY_DN104929_c0_g1:221-1528(+)	1	2.70389e-06	154.81	QFLFNLLK(1)SR	2	0.32449	1
TRINITY_DN104929_c0_g1_m.10154	140	K	TRINITY_DN104929_c0_g1|g.10154 ORF TRINITY_DN104929_c0_g1|g.10154 TRINITY_DN104929_c0_g1_m.10154 type:3prime_partial len:437 (+) TRINITY_DN104929_c0_g1:221-1528(+)	1	5.41138e-09	158.61	VK(1)QFLFNLLK	2	1.6929	1
TRINITY_DN104929_c0_g1_m.10154	55	K	TRINITY_DN104929_c0_g1|g.10154 ORF TRINITY_DN104929_c0_g1|g.10154 TRINITY_DN104929_c0_g1_m.10154 type:3prime_partial len:437 (+) TRINITY_DN104929_c0_g1:221-1528(+)	1	0.0101437	83.358	GHDK(1)FFQSK	2	1.0644	1
TRINITY_DN104937_c3_g1_m.10182	449	K	TRINITY_DN104937_c3_g1|g.10182 ORF TRINITY_DN104937_c3_g1|g.10182 TRINITY_DN104937_c3_g1_m.10182 type:complete len:482 (+) TRINITY_DN104937_c3_g1:191-1636(+)	1	0.0204866	84.699	ELK(1)ELAR	2	1.2108	1
TRINITY_DN104943_c0_g1_m.10199	127	K	TRINITY_DN104943_c0_g1|g.10199 ORF TRINITY_DN104943_c0_g1|g.10199 TRINITY_DN104943_c0_g1_m.10199 type:internal len:139 (+) TRINITY_DN104943_c0_g1:1-414(+)	1	0.000149589	113.7	SNWQYK(1)WK	2	-1.7795	1
TRINITY_DN104949_c0_g1_m.10211	1149	K	TRINITY_DN104949_c0_g1|g.10211 ORF TRINITY_DN104949_c0_g1|g.10211 TRINITY_DN104949_c0_g1_m.10211 type:complete len:2097 (+) TRINITY_DN104949_c0_g1:149-6439(+)	1	9.53802e-09	151.66	SELQQTK(1)SVAER	2	-1.3147	1
TRINITY_DN104949_c0_g1_m.10211	243	K	TRINITY_DN104949_c0_g1|g.10211 ORF TRINITY_DN104949_c0_g1|g.10211 TRINITY_DN104949_c0_g1_m.10211 type:complete len:2097 (+) TRINITY_DN104949_c0_g1:149-6439(+)	1	1.98417e-15	147.19	EYSISLNHSK(1)ER	2	-0.1382	1
TRINITY_DN104949_c0_g1_m.10211	1440	K	TRINITY_DN104949_c0_g1|g.10211 ORF TRINITY_DN104949_c0_g1|g.10211 TRINITY_DN104949_c0_g1_m.10211 type:complete len:2097 (+) TRINITY_DN104949_c0_g1:149-6439(+)	1	0.00212114	87.895	EKEELNSK(1)K	2	-1.6864	1
TRINITY_DN104949_c0_g1_m.10211	874	K	TRINITY_DN104949_c0_g1|g.10211 ORF TRINITY_DN104949_c0_g1|g.10211 TRINITY_DN104949_c0_g1_m.10211 type:complete len:2097 (+) TRINITY_DN104949_c0_g1:149-6439(+)	1	0.00238456	85.813	ILTVEK(1)ER	2	-0.83709	1
TRINITY_DN104949_c0_g1_m.10211	1482	K	TRINITY_DN104949_c0_g1|g.10211 ORF TRINITY_DN104949_c0_g1|g.10211 TRINITY_DN104949_c0_g1_m.10211 type:complete len:2097 (+) TRINITY_DN104949_c0_g1:149-6439(+)	1	0.0157237	41.87	EDFSSK(1)TQATAK	2	-1.7712	2
TRINITY_DN104949_c0_g1_m.10211	224	K	TRINITY_DN104949_c0_g1|g.10211 ORF TRINITY_DN104949_c0_g1|g.10211 TRINITY_DN104949_c0_g1_m.10211 type:complete len:2097 (+) TRINITY_DN104949_c0_g1:149-6439(+)	1	4.76031e-09	93.777	TQMDAESDASSK(1)IADLER	2	-0.35397	1
TRINITY_DN104949_c0_g1_m.10211	82	K	TRINITY_DN104949_c0_g1|g.10211 ORF TRINITY_DN104949_c0_g1|g.10211 TRINITY_DN104949_c0_g1_m.10211 type:complete len:2097 (+) TRINITY_DN104949_c0_g1:149-6439(+)	1	9.797e-08	137.39	LQYENAQLSASTK(1)K	2	-3.1389	1
TRINITY_DN104949_c0_g1_m.10211	1434	K	TRINITY_DN104949_c0_g1|g.10211 ORF TRINITY_DN104949_c0_g1|g.10211 TRINITY_DN104949_c0_g1_m.10211 type:complete len:2097 (+) TRINITY_DN104949_c0_g1:149-6439(+)	1	0.00207763	81.642	EK(1)EELNSK	2	-0.12036	1
TRINITY_DN104953_c1_g3_m.10217	17	K	TRINITY_DN104953_c1_g3|g.10217 ORF TRINITY_DN104953_c1_g3|g.10217 TRINITY_DN104953_c1_g3_m.10217 type:5prime_partial len:383 (+) TRINITY_DN104953_c1_g3:1-1149(+)	1	0.0650908	43.306	SDDTQEK(1)VVSR	2	-3.8974	1
TRINITY_DN104961_c1_g2_m.10230	306	K	TRINITY_DN104961_c1_g2|g.10230 ORF TRINITY_DN104961_c1_g2|g.10230 TRINITY_DN104961_c1_g2_m.10230 type:complete len:844 (+) TRINITY_DN104961_c1_g2:182-2713(+)	1	0.000118132	83.358	LGVTMK(1)NEEK	2	0.52361	1
TRINITY_DN104961_c1_g2_m.10230	571	K	TRINITY_DN104961_c1_g2|g.10230 ORF TRINITY_DN104961_c1_g2|g.10230 TRINITY_DN104961_c1_g2_m.10230 type:complete len:844 (+) TRINITY_DN104961_c1_g2:182-2713(+)	1	0.0122544	79.059	ETVLEK(1)SSR	2	-1.4126	1
TRINITY_DN104961_c1_g2_m.10230	579	K	TRINITY_DN104961_c1_g2|g.10230 ORF TRINITY_DN104961_c1_g2|g.10230 TRINITY_DN104961_c1_g2_m.10230 type:complete len:844 (+) TRINITY_DN104961_c1_g2:182-2713(+)	1	0.0167418	62.969	TVMSK(1)SPNK	2	0.46976	1
TRINITY_DN104961_c1_g2_m.10230	842	K	TRINITY_DN104961_c1_g2|g.10230 ORF TRINITY_DN104961_c1_g2|g.10230 TRINITY_DN104961_c1_g2_m.10230 type:complete len:844 (+) TRINITY_DN104961_c1_g2:182-2713(+)	1	7.44383e-08	88.734	EQMTPLSEFEDK(1)L	2	2.9945	1
TRINITY_DN104961_c1_g2_m.10230	438	K	TRINITY_DN104961_c1_g2|g.10230 ORF TRINITY_DN104961_c1_g2|g.10230 TRINITY_DN104961_c1_g2_m.10230 type:complete len:844 (+) TRINITY_DN104961_c1_g2:182-2713(+)	1	0.0114472	63.301	TVIWMGK(1)R	2	-2.978	1
TRINITY_DN104961_c1_g2_m.10230	315	K	TRINITY_DN104961_c1_g2|g.10230 ORF TRINITY_DN104961_c1_g2|g.10230 TRINITY_DN104961_c1_g2_m.10230 type:complete len:844 (+) TRINITY_DN104961_c1_g2:182-2713(+)	1	0.0161406	48.157	DLVGK(1)ALMK	2	-1.737	1
TRINITY_DN104961_c1_g2_m.10230	427	K	TRINITY_DN104961_c1_g2|g.10230 ORF TRINITY_DN104961_c1_g2|g.10230 TRINITY_DN104961_c1_g2_m.10230 type:complete len:844 (+) TRINITY_DN104961_c1_g2:182-2713(+)	1	0.00274828	72.038	DLYVK(1)SVQR	2	-2.3213	1
TRINITY_DN104961_c1_g2_m.10230	628	K	TRINITY_DN104961_c1_g2|g.10230 ORF TRINITY_DN104961_c1_g2|g.10230 TRINITY_DN104961_c1_g2_m.10230 type:complete len:844 (+) TRINITY_DN104961_c1_g2:182-2713(+)	1	3.36516e-12	172.51	ILSEEFGWDK(1)DLAK	2	2.0707	1
TRINITY_DN104961_c1_g2_m.10230	255	K	TRINITY_DN104961_c1_g2|g.10230 ORF TRINITY_DN104961_c1_g2|g.10230 TRINITY_DN104961_c1_g2_m.10230 type:complete len:844 (+) TRINITY_DN104961_c1_g2:182-2713(+)	1	0.00168383	66.953	LWGENFFDPATK(1)K	2	1.1543	1
TRINITY_DN104961_c1_g2_m.10230	16	K	TRINITY_DN104961_c1_g2|g.10230 ORF TRINITY_DN104961_c1_g2|g.10230 TRINITY_DN104961_c1_g2_m.10230 type:complete len:844 (+) TRINITY_DN104961_c1_g2:182-2713(+)	1	1.99312e-05	130.31	IMDLK(1)HNIR	2	-3.054	1
TRINITY_DN104961_c1_g2_m.10230	3	K	TRINITY_DN104961_c1_g2|g.10230 ORF TRINITY_DN104961_c1_g2|g.10230 TRINITY_DN104961_c1_g2_m.10230 type:complete len:844 (+) TRINITY_DN104961_c1_g2:182-2713(+)	1	0.00112824	93.467	VK(1)FTADELR	2	1.0901	1
TRINITY_DN104961_c1_g2_m.10230	310	K	TRINITY_DN104961_c1_g2|g.10230 ORF TRINITY_DN104961_c1_g2|g.10230 TRINITY_DN104961_c1_g2_m.10230 type:complete len:844 (+) TRINITY_DN104961_c1_g2:182-2713(+)	1	0.000316971	92.732	NEEK(1)DLVGK	2	0.3556	1
TRINITY_DN104961_c1_g2_m.10230	291	K	TRINITY_DN104961_c1_g2|g.10230 ORF TRINITY_DN104961_c1_g2|g.10230 TRINITY_DN104961_c1_g2_m.10230 type:complete len:844 (+) TRINITY_DN104961_c1_g2:182-2713(+)	1	0.00033373	111.39	TCMNDQK(1)DK	2	-0.28801	1
TRINITY_DN104961_c1_g2_m.10230	471	K	TRINITY_DN104961_c1_g2|g.10230 ORF TRINITY_DN104961_c1_g2|g.10230 TRINITY_DN104961_c1_g2_m.10230 type:complete len:844 (+) TRINITY_DN104961_c1_g2:182-2713(+)	1	4.45881e-26	180.17	NATLTNEK(1)EVDAHPIR	3	1.3396	3
TRINITY_DN104961_c1_g2_m.10230	268	K	TRINITY_DN104961_c1_g2|g.10230 ORF TRINITY_DN104961_c1_g2|g.10230 TRINITY_DN104961_c1_g2_m.10230 type:complete len:844 (+) TRINITY_DN104961_c1_g2:182-2713(+)	1	0.000616035	81.163	NTGSPTCK(1)R	2	0.82133	1
TRINITY_DN104961_c1_g2_m.10230	482	K	TRINITY_DN104961_c1_g2|g.10230 ORF TRINITY_DN104961_c1_g2|g.10230 TRINITY_DN104961_c1_g2_m.10230 type:complete len:844 (+) TRINITY_DN104961_c1_g2:182-2713(+)	1	0.0120065	41.796	AMK(1)FSVSPVVR	2	-0.5564	1
TRINITY_DN104961_c1_g2_m.10230	722	K	TRINITY_DN104961_c1_g2|g.10230 ORF TRINITY_DN104961_c1_g2|g.10230 TRINITY_DN104961_c1_g2_m.10230 type:complete len:844 (+) TRINITY_DN104961_c1_g2:182-2713(+)	1	1.73645e-15	133.76	VIYASQLTAK(1)PR	2	-1.3572	1
TRINITY_DN104961_c1_g2_m.10230	232	K	TRINITY_DN104961_c1_g2|g.10230 ORF TRINITY_DN104961_c1_g2|g.10230 TRINITY_DN104961_c1_g2_m.10230 type:complete len:844 (+) TRINITY_DN104961_c1_g2:182-2713(+)	1	8.82219e-05	61.577	MYASK(1)FGVDESK	2	-2.0019	2
TRINITY_DN104961_c1_g2_m.10230	260	K	TRINITY_DN104961_c1_g2|g.10230 ORF TRINITY_DN104961_c1_g2|g.10230 TRINITY_DN104961_c1_g2_m.10230 type:complete len:844 (+) TRINITY_DN104961_c1_g2:182-2713(+)	1	0.000794381	94.791	WTSK(1)NTGSPTCK	2	-1.7447	1
TRINITY_DN104961_c1_g2_m.10230	496	K	TRINITY_DN104961_c1_g2|g.10230 ORF TRINITY_DN104961_c1_g2|g.10230 TRINITY_DN104961_c1_g2_m.10230 type:complete len:844 (+) TRINITY_DN104961_c1_g2:182-2713(+)	1	4.91077e-05	84.999	VAVSCK(1)VASDLPK	2	1.4428	1
TRINITY_DN104983_c2_g2_m.10276	747	K	TRINITY_DN104983_c2_g2|g.10276 ORF TRINITY_DN104983_c2_g2|g.10276 TRINITY_DN104983_c2_g2_m.10276 type:complete len:812 (+) TRINITY_DN104983_c2_g2:253-2688(+)	1	1.94548e-05	119.94	ASHFEESMK(1)YAR	2	-2.0345	1
TRINITY_DN104983_c2_g2_m.10276	342	K	TRINITY_DN104983_c2_g2|g.10276 ORF TRINITY_DN104983_c2_g2|g.10276 TRINITY_DN104983_c2_g2_m.10276 type:complete len:812 (+) TRINITY_DN104983_c2_g2:253-2688(+)	1	0.000259005	75.012	IVSQLLTLMDGLK(1)SR	2	1.5376	1
TRINITY_DN104983_c2_g2_m.10276	620	K	TRINITY_DN104983_c2_g2|g.10276 ORF TRINITY_DN104983_c2_g2|g.10276 TRINITY_DN104983_c2_g2_m.10276 type:complete len:812 (+) TRINITY_DN104983_c2_g2:253-2688(+)	1	1.1093e-06	92.747	VLNQLLTEMDGMSAK(1)K	2	1.7197	1
TRINITY_DN104983_c2_g2_m.10276	318	K	TRINITY_DN104983_c2_g2|g.10276 ORF TRINITY_DN104983_c2_g2|g.10276 TRINITY_DN104983_c2_g2_m.10276 type:complete len:812 (+) TRINITY_DN104983_c2_g2:253-2688(+)	1	1.20684e-13	102.26	NAPSIIFIDEIDSIAPK(1)R	2	2.7408	1
TRINITY_DN104983_c2_g2_m.10276	711	K	TRINITY_DN104983_c2_g2|g.10276 ORF TRINITY_DN104983_c2_g2|g.10276 TRINITY_DN104983_c2_g2_m.10276 type:complete len:812 (+) TRINITY_DN104983_c2_g2:253-2688(+)	1	0.0378322	67.881	ENIEK(1)DIEK	2	1.524	1
TRINITY_DN104983_c2_g2_m.10276	674	K	TRINITY_DN104983_c2_g2|g.10276 ORF TRINITY_DN104983_c2_g2|g.10276 TRINITY_DN104983_c2_g2_m.10276 type:complete len:812 (+) TRINITY_DN104983_c2_g2:253-2688(+)	1	1.92681e-06	110.91	SPISK(1)DVDLAALAK	2	-1.2053	1
TRINITY_DN105015_c0_g1_m.10346	20	K	TRINITY_DN105015_c0_g1|g.10346 ORF TRINITY_DN105015_c0_g1|g.10346 TRINITY_DN105015_c0_g1_m.10346 type:complete len:382 (+) TRINITY_DN105015_c0_g1:137-1282(+)	1	0.00186402	50.116	LLEIAEK(1)LLDAR	2	-0.054504	1
TRINITY_DN105019_c2_g13_m.10355	67	K	TRINITY_DN105019_c2_g13|g.10355 ORF TRINITY_DN105019_c2_g13|g.10355 TRINITY_DN105019_c2_g13_m.10355 type:internal len:168 (+) TRINITY_DN105019_c2_g13:3-503(+)	1	2.50208e-05	113.14	LFDDGVVK(1)R	2	-0.68446	1
TRINITY_DN105019_c2_g13_m.10355	145	K	TRINITY_DN105019_c2_g13|g.10355 ORF TRINITY_DN105019_c2_g13|g.10355 TRINITY_DN105019_c2_g13_m.10355 type:internal len:168 (+) TRINITY_DN105019_c2_g13:3-503(+)	1	0.000781941	100.75	LYDSGK(1)AR	2	1.311	1
TRINITY_DN105019_c2_g13_m.10355	157	K	TRINITY_DN105019_c2_g13|g.10355 ORF TRINITY_DN105019_c2_g13|g.10355 TRINITY_DN105019_c2_g13_m.10355 type:internal len:168 (+) TRINITY_DN105019_c2_g13:3-503(+)	1	0.00114434	57.888	AIGVSNFSTK(1)K	2	-3.2291	1
TRINITY_DN105019_c2_g14_m.10356	178	K	TRINITY_DN105019_c2_g14|g.10356 ORF TRINITY_DN105019_c2_g14|g.10356 TRINITY_DN105019_c2_g14_m.10356 type:5prime_partial len:204 (+) TRINITY_DN105019_c2_g14:2-613(+)	1	0.0117084	78.932	FSTIQQEK(1)LVR	2	0.64295	1
TRINITY_DN105022_c1_g4_m.10369	102	K	TRINITY_DN105022_c1_g4|g.10369 ORF TRINITY_DN105022_c1_g4|g.10369 TRINITY_DN105022_c1_g4_m.10369 type:complete len:146 (-) TRINITY_DN105022_c1_g4:2853-3290(-)	1	0.000701413	95.656	VK(1)ESLLEQNPSAK	2	-1.2826	1
TRINITY_DN105035_c0_g4_m.10394	156	K	TRINITY_DN105035_c0_g4|g.10394 ORF TRINITY_DN105035_c0_g4|g.10394 TRINITY_DN105035_c0_g4_m.10394 type:complete len:635 (+) TRINITY_DN105035_c0_g4:270-2174(+)	1	7.19837e-08	97.175	LVQQQAQTK(1)AQMAR	2	-8.0582	1
TRINITY_DN105048_c0_g1_m.10416	75	K	TRINITY_DN105048_c0_g1|g.10416 ORF TRINITY_DN105048_c0_g1|g.10416 TRINITY_DN105048_c0_g1_m.10416 type:complete len:177 (+) TRINITY_DN105048_c0_g1:231-761(+)	1	0.0171015	63.397	YAVWK(1)AADIR	2	-1.1018	1
TRINITY_DN105080_c0_g1_m.10486	761	K	TRINITY_DN105080_c0_g1|g.10486 ORF TRINITY_DN105080_c0_g1|g.10486 TRINITY_DN105080_c0_g1_m.10486 type:complete len:1496 (+) TRINITY_DN105080_c0_g1:1195-5682(+)	1	0.0165094	67.881	GINLSGGQK(1)QR	2	-0.43429	1
TRINITY_DN105080_c0_g1_m.10486	513	K	TRINITY_DN105080_c0_g1|g.10486 ORF TRINITY_DN105080_c0_g1|g.10486 TRINITY_DN105080_c0_g1_m.10486 type:complete len:1496 (+) TRINITY_DN105080_c0_g1:1195-5682(+)	1	0.00527994	66.664	FQAWEEHFNK(1)R	2	-4.2014	1
TRINITY_DN105095_c0_g1_m.10527	121	K	TRINITY_DN105095_c0_g1|g.10527 ORF TRINITY_DN105095_c0_g1|g.10527 TRINITY_DN105095_c0_g1_m.10527 type:5prime_partial len:476 (+) TRINITY_DN105095_c0_g1:1-1428(+)	1	3.6691e-06	76.255	NFFK(1)VTTTDDPVIR	2	-2.7591	1
TRINITY_DN105098_c2_g8_m.10531	124	K	TRINITY_DN105098_c2_g8|g.10531 ORF TRINITY_DN105098_c2_g8|g.10531 TRINITY_DN105098_c2_g8_m.10531 type:5prime_partial len:210 (+) TRINITY_DN105098_c2_g8:3-632(+)	1	0.0169449	51.43	AK(1)LVIFPR	2	-2.1555	1
TRINITY_DN105113_c0_g1_m.10566	151	K	TRINITY_DN105113_c0_g1|g.10566 ORF TRINITY_DN105113_c0_g1|g.10566 TRINITY_DN105113_c0_g1_m.10566 type:complete len:236 (+) TRINITY_DN105113_c0_g1:129-836(+)	1	0.000702223	54.199	LENGK(1)VFDSSYDR	2	0.16277	1
TRINITY_DN105113_c0_g1_m.10566	135	K	TRINITY_DN105113_c0_g1|g.10566 ORF TRINITY_DN105113_c0_g1|g.10566 TRINITY_DN105113_c0_g1_m.10566 type:complete len:236 (+) TRINITY_DN105113_c0_g1:129-836(+)	1	0.00016483	108.5	VVGSGVGPSK(1)GLLIK	2	2.5399	1
TRINITY_DN105134_c0_g1_m.10617	161	K	TRINITY_DN105134_c0_g1|g.10617 ORF TRINITY_DN105134_c0_g1|g.10617 TRINITY_DN105134_c0_g1_m.10617 type:5prime_partial len:653 (+) TRINITY_DN105134_c0_g1:3-1961(+)	1	0.0384032	44.767	SGTK(1)VTR	2	-0.91058	1
TRINITY_DN105134_c0_g1_m.10617	233	K	TRINITY_DN105134_c0_g1|g.10617 ORF TRINITY_DN105134_c0_g1|g.10617 TRINITY_DN105134_c0_g1_m.10617 type:5prime_partial len:653 (+) TRINITY_DN105134_c0_g1:3-1961(+)	1	2.93598e-05	133.49	NVAQADASMK(1)AGK	2	-0.983	2
TRINITY_DN105134_c0_g1_m.10617	118	K	TRINITY_DN105134_c0_g1|g.10617 ORF TRINITY_DN105134_c0_g1|g.10617 TRINITY_DN105134_c0_g1_m.10617 type:5prime_partial len:653 (+) TRINITY_DN105134_c0_g1:3-1961(+)	1	3.07546e-20	129.04	PTVLVSEK(1)LGEAGLELLR	2	4.8853	1
TRINITY_DN105134_c0_g1_m.10617	259	K	TRINITY_DN105134_c0_g1|g.10617 ORF TRINITY_DN105134_c0_g1|g.10617 TRINITY_DN105134_c0_g1_m.10617 type:5prime_partial len:653 (+) TRINITY_DN105134_c0_g1:3-1961(+)	1	6.6894e-06	97.084	NLAIMGFGK(1)VGSEVAR	2	2.0525	1
TRINITY_DN105134_c0_g1_m.10617	241	K	TRINITY_DN105134_c0_g1|g.10617 ORF TRINITY_DN105134_c0_g1|g.10617 TRINITY_DN105134_c0_g1_m.10617 type:5prime_partial len:653 (+) TRINITY_DN105134_c0_g1:3-1961(+)	1	0.013241	54.584	NK(1)YVGVSLVGK	2	-2.1081	1
TRINITY_DN105134_c0_g1_m.10617	328	K	TRINITY_DN105134_c0_g1|g.10617 ORF TRINITY_DN105134_c0_g1|g.10617 TRINITY_DN105134_c0_g1_m.10617 type:5prime_partial len:653 (+) TRINITY_DN105134_c0_g1:3-1961(+)	1	1.59476e-05	127.94	IFNDENFAK(1)MK	2	3.9484	1
TRINITY_DN105134_c0_g1_m.10617	506	K	TRINITY_DN105134_c0_g1|g.10617 ORF TRINITY_DN105134_c0_g1|g.10617 TRINITY_DN105134_c0_g1_m.10617 type:5prime_partial len:653 (+) TRINITY_DN105134_c0_g1:3-1961(+)	1	0.000349551	89.923	GIVEPVSSVFVNLVNADYIAK(1)QR	3	2.5708	1
TRINITY_DN105134_c0_g1_m.10617	171	K	TRINITY_DN105134_c0_g1|g.10617 ORF TRINITY_DN105134_c0_g1|g.10617 TRINITY_DN105134_c0_g1_m.10617 type:5prime_partial len:653 (+) TRINITY_DN105134_c0_g1:3-1961(+)	1	0.00738236	65.156	EVFEASK(1)GR	2	-0.42877	1
TRINITY_DN105145_c1_g3_m.10651	495	K	TRINITY_DN105145_c1_g3|g.10651 ORF TRINITY_DN105145_c1_g3|g.10651 TRINITY_DN105145_c1_g3_m.10651 type:complete len:701 (+) TRINITY_DN105145_c1_g3:141-2243(+)	1	6.59974e-06	69.224	LTSAGK(1)NNAFPSPSPDGK	2	-2.1498	1
TRINITY_DN105158_c25_g1_m.10689	169	K	TRINITY_DN105158_c25_g1|g.10689 ORF TRINITY_DN105158_c25_g1|g.10689 TRINITY_DN105158_c25_g1_m.10689 type:complete len:324 (+) TRINITY_DN105158_c25_g1:248-1219(+)	1	0.00314375	97.033	LK(1)QQGSR	2	0.32138	1
TRINITY_DN105158_c25_g1_m.10689	65	K	TRINITY_DN105158_c25_g1|g.10689 ORF TRINITY_DN105158_c25_g1|g.10689 TRINITY_DN105158_c25_g1_m.10689 type:complete len:324 (+) TRINITY_DN105158_c25_g1:248-1219(+)	1	4.14331e-27	180.11	ASEQQGK(1)VQEDEVVDSK	2	-4.3793	1
TRINITY_DN105189_c5_g1_m.10750	391	K	TRINITY_DN105189_c5_g1|g.10750 ORF TRINITY_DN105189_c5_g1|g.10750 TRINITY_DN105189_c5_g1_m.10750 type:5prime_partial len:884 (+) TRINITY_DN105189_c5_g1:1-2652(+)	1	2.37717e-12	133.49	VK(1)ANMTEEDLAELAR	2	-2.5028	2
TRINITY_DN105189_c5_g1_m.10750	662	K	TRINITY_DN105189_c5_g1|g.10750 ORF TRINITY_DN105189_c5_g1|g.10750 TRINITY_DN105189_c5_g1_m.10750 type:5prime_partial len:884 (+) TRINITY_DN105189_c5_g1:1-2652(+)	1	0.00189314	94.66	NLNHSTK(1)FVAK	2	-2.1785	1
TRINITY_DN105189_c5_g1_m.10750	412	K	TRINITY_DN105189_c5_g1|g.10750 ORF TRINITY_DN105189_c5_g1|g.10750 TRINITY_DN105189_c5_g1_m.10750 type:5prime_partial len:884 (+) TRINITY_DN105189_c5_g1:1-2652(+)	1	1.32284e-11	131.54	LK(1)QETPDSPEALR	2	-2.0796	1
TRINITY_DN105189_c5_g1_m.10750	165	K	TRINITY_DN105189_c5_g1|g.10750 ORF TRINITY_DN105189_c5_g1|g.10750 TRINITY_DN105189_c5_g1_m.10750 type:5prime_partial len:884 (+) TRINITY_DN105189_c5_g1:1-2652(+)	1	0.00702682	69.093	LFK(1)EPVR	2	-1.2717	1
TRINITY_DN105189_c5_g1_m.10750	111	K	TRINITY_DN105189_c5_g1|g.10750 ORF TRINITY_DN105189_c5_g1|g.10750 TRINITY_DN105189_c5_g1_m.10750 type:5prime_partial len:884 (+) TRINITY_DN105189_c5_g1:1-2652(+)	1	8.2422e-08	145.75	LTFEEFK(1)EFHQK	2	-3.3652	1
TRINITY_DN105189_c5_g1_m.10750	842	K	TRINITY_DN105189_c5_g1|g.10750 ORF TRINITY_DN105189_c5_g1|g.10750 TRINITY_DN105189_c5_g1_m.10750 type:5prime_partial len:884 (+) TRINITY_DN105189_c5_g1:1-2652(+)	0.843458	0.0031399	47.844	LK(0.157)DFK(0.843)EFADVIETVK	2	1.993	1
TRINITY_DN105189_c5_g1_m.10750	116	K	TRINITY_DN105189_c5_g1|g.10750 ORF TRINITY_DN105189_c5_g1|g.10750 TRINITY_DN105189_c5_g1_m.10750 type:5prime_partial len:884 (+) TRINITY_DN105189_c5_g1:1-2652(+)	1	0.000167799	93.162	EFHQK(1)YYHPSNAR	3	1.0789	1
TRINITY_DN105189_c5_g1_m.10750	566	K	TRINITY_DN105189_c5_g1|g.10750 ORF TRINITY_DN105189_c5_g1|g.10750 TRINITY_DN105189_c5_g1_m.10750 type:5prime_partial len:884 (+) TRINITY_DN105189_c5_g1:1-2652(+)	1	0.0112551	65.933	FK(1)QFVSQSK	2	-1.2253	1
TRINITY_DN105189_c5_g1_m.10750	338	K	TRINITY_DN105189_c5_g1|g.10750 ORF TRINITY_DN105189_c5_g1|g.10750 TRINITY_DN105189_c5_g1_m.10750 type:5prime_partial len:884 (+) TRINITY_DN105189_c5_g1:1-2652(+)	1	0.0545815	53.878	PLQSLK(1)ER	2	-1.5246	1
TRINITY_DN105189_c5_g1_m.10750	666	K	TRINITY_DN105189_c5_g1|g.10750 ORF TRINITY_DN105189_c5_g1|g.10750 TRINITY_DN105189_c5_g1_m.10750 type:5prime_partial len:884 (+) TRINITY_DN105189_c5_g1:1-2652(+)	1	7.01314e-05	52.149	FVAK(1)FLDLLPSSASTELHPLR	3	-0.60918	1
TRINITY_DN105189_c5_g1_m.10750	573	K	TRINITY_DN105189_c5_g1|g.10750 ORF TRINITY_DN105189_c5_g1|g.10750 TRINITY_DN105189_c5_g1_m.10750 type:5prime_partial len:884 (+) TRINITY_DN105189_c5_g1:1-2652(+)	1	0.00139799	102.46	QFVSQSK(1)AR	2	2.4737	1
TRINITY_DN105189_c5_g1_m.10750	852	K	TRINITY_DN105189_c5_g1|g.10750 ORF TRINITY_DN105189_c5_g1|g.10750 TRINITY_DN105189_c5_g1_m.10750 type:5prime_partial len:884 (+) TRINITY_DN105189_c5_g1:1-2652(+)	1	8.43048e-05	94.66	EFADVIETVK(1)DK	2	-1.598	1
TRINITY_DN105223_c2_g1_m.10826	92	K	TRINITY_DN105223_c2_g1|g.10826 ORF TRINITY_DN105223_c2_g1|g.10826 TRINITY_DN105223_c2_g1_m.10826 type:complete len:497 (+) TRINITY_DN105223_c2_g1:217-1707(+)	1	0.0135029	73.655	DNK(1)GPIAECLVK	2	0.93506	1
TRINITY_DN105223_c2_g1_m.10826	482	K	TRINITY_DN105223_c2_g1|g.10826 ORF TRINITY_DN105223_c2_g1|g.10826 TRINITY_DN105223_c2_g1_m.10826 type:complete len:497 (+) TRINITY_DN105223_c2_g1:217-1707(+)	1	0.0663501	55.578	IK(1)STVINLPSPSYSIG	2	4.3766	1
TRINITY_DN105223_c2_g1_m.10826	67	K	TRINITY_DN105223_c2_g1|g.10826 ORF TRINITY_DN105223_c2_g1|g.10826 TRINITY_DN105223_c2_g1_m.10826 type:complete len:497 (+) TRINITY_DN105223_c2_g1:217-1707(+)	1	0.0187506	51.43	AAQK(1)AWAR	2	1.5321	1
TRINITY_DN105223_c2_g1_m.10826	63	K	TRINITY_DN105223_c2_g1|g.10826 ORF TRINITY_DN105223_c2_g1|g.10826 TRINITY_DN105223_c2_g1_m.10826 type:complete len:497 (+) TRINITY_DN105223_c2_g1:217-1707(+)	1	0.0104307	60.892	VMEGAK(1)AAQK	2	0.55518	1
TRINITY_DN105223_c2_g1_m.10826	57	K	TRINITY_DN105223_c2_g1|g.10826 ORF TRINITY_DN105223_c2_g1|g.10826 TRINITY_DN105223_c2_g1_m.10826 type:complete len:497 (+) TRINITY_DN105223_c2_g1:217-1707(+)	1	3.48973e-20	202.58	VQACTQEEVNK(1)VMEGAK	2	-0.29908	2
TRINITY_DN105223_c2_g1_m.10826	101	K	TRINITY_DN105223_c2_g1|g.10826 ORF TRINITY_DN105223_c2_g1|g.10826 TRINITY_DN105223_c2_g1_m.10826 type:complete len:497 (+) TRINITY_DN105223_c2_g1:217-1707(+)	1	0.000451975	80.623	GPIAECLVK(1)EIAK	2	0.85759	1
TRINITY_DN105223_c2_g1_m.10826	89	K	TRINITY_DN105223_c2_g1|g.10826 ORF TRINITY_DN105223_c2_g1|g.10826 TRINITY_DN105223_c2_g1_m.10826 type:complete len:497 (+) TRINITY_DN105223_c2_g1:217-1707(+)	1	0.0441008	48.157	AAAILK(1)DNK	2	-3.5801	1
TRINITY_DN105223_c2_g1_m.10826	358	K	TRINITY_DN105223_c2_g1|g.10826 ORF TRINITY_DN105223_c2_g1|g.10826 TRINITY_DN105223_c2_g1_m.10826 type:complete len:497 (+) TRINITY_DN105223_c2_g1:217-1707(+)	1	0.000546773	101.45	EK(1)GATFCQEYR	2	-1.1813	1
TRINITY_DN105250_c2_g3_m.10894	51	K	TRINITY_DN105250_c2_g3|g.10894 ORF TRINITY_DN105250_c2_g3|g.10894 TRINITY_DN105250_c2_g3_m.10894 type:complete len:460 (+) TRINITY_DN105250_c2_g3:144-1523(+)	1	0.000188605	108.93	TVADVK(1)DANNR	2	0.38624	1
TRINITY_DN105250_c2_g3_m.10894	26	K	TRINITY_DN105250_c2_g3|g.10894 ORF TRINITY_DN105250_c2_g3|g.10894 TRINITY_DN105250_c2_g3_m.10894 type:complete len:460 (+) TRINITY_DN105250_c2_g3:144-1523(+)	1	0.0666145	46.447	TGK(1)LELFK	2	-5.0236	1
TRINITY_DN105265_c2_g4_m.10931	93	K	TRINITY_DN105265_c2_g4|g.10931 ORF TRINITY_DN105265_c2_g4|g.10931 TRINITY_DN105265_c2_g4_m.10931 type:complete len:484 (+) TRINITY_DN105265_c2_g4:126-1577(+)	1	0.0109468	59.645	IMEYK(1)DESQR	2	-0.04763	1
TRINITY_DN105288_c2_g1_m.10974	306	K	TRINITY_DN105288_c2_g1|g.10974 ORF TRINITY_DN105288_c2_g1|g.10974 TRINITY_DN105288_c2_g1_m.10974 type:5prime_partial len:489 (+) TRINITY_DN105288_c2_g1:2-1468(+)	1	0.000529229	77.358	WLKPHLETAK(1)TK	3	0.59899	2
TRINITY_DN105288_c2_g1_m.10974	241	K	TRINITY_DN105288_c2_g1|g.10974 ORF TRINITY_DN105288_c2_g1|g.10974 TRINITY_DN105288_c2_g1_m.10974 type:5prime_partial len:489 (+) TRINITY_DN105288_c2_g1:2-1468(+)	1	5.11728e-09	99.855	VQLEQISK(1)LK	2	-0.36894	1
TRINITY_DN105288_c2_g1_m.10974	94	K	TRINITY_DN105288_c2_g1|g.10974 ORF TRINITY_DN105288_c2_g1|g.10974 TRINITY_DN105288_c2_g1_m.10974 type:5prime_partial len:489 (+) TRINITY_DN105288_c2_g1:2-1468(+)	1	0.00137363	87.895	LEIEHLK(1)SK	2	-0.56896	1
TRINITY_DN105288_c2_g1_m.10974	114	K	TRINITY_DN105288_c2_g1|g.10974 ORF TRINITY_DN105288_c2_g1|g.10974 TRINITY_DN105288_c2_g1_m.10974 type:5prime_partial len:489 (+) TRINITY_DN105288_c2_g1:2-1468(+)	1	5.08972e-11	150.21	NK(1)DETIEQLER	2	-1.5219	1
TRINITY_DN105288_c2_g1_m.10974	208	K	TRINITY_DN105288_c2_g1|g.10974 ORF TRINITY_DN105288_c2_g1|g.10974 TRINITY_DN105288_c2_g1_m.10974 type:5prime_partial len:489 (+) TRINITY_DN105288_c2_g1:2-1468(+)	1	2.00012e-15	187.85	LESLEK(1)TNDEQK	2	-0.69269	1
TRINITY_DN105288_c2_g1_m.10974	202	K	TRINITY_DN105288_c2_g1|g.10974 ORF TRINITY_DN105288_c2_g1|g.10974 TRINITY_DN105288_c2_g1_m.10974 type:5prime_partial len:489 (+) TRINITY_DN105288_c2_g1:2-1468(+)	1	0.000405076	81.48	VQELNLK(1)LESLEK	2	-2.0384	2
TRINITY_DN105288_c2_g1_m.10974	107	K	TRINITY_DN105288_c2_g1|g.10974 ORF TRINITY_DN105288_c2_g1|g.10974 TRINITY_DN105288_c2_g1_m.10974 type:5prime_partial len:489 (+) TRINITY_DN105288_c2_g1:2-1468(+)	1	2.89928e-11	132.44	ISSLETSTLEK(1)AR	2	-2.6559	1
TRINITY_DN105288_c2_g1_m.10974	172	K	TRINITY_DN105288_c2_g1|g.10974 ORF TRINITY_DN105288_c2_g1|g.10974 TRINITY_DN105288_c2_g1_m.10974 type:5prime_partial len:489 (+) TRINITY_DN105288_c2_g1:2-1468(+)	1	1.32344e-29	216.04	LK(1)NEIEEQTNQR	2	-0.99392	1
TRINITY_DN105288_c2_g1_m.10974	96	K	TRINITY_DN105288_c2_g1|g.10974 ORF TRINITY_DN105288_c2_g1|g.10974 TRINITY_DN105288_c2_g1_m.10974 type:5prime_partial len:489 (+) TRINITY_DN105288_c2_g1:2-1468(+)	1	2.74597e-05	121.71	SK(1)ISSLETSTLEK	2	2.3647	1
TRINITY_DN105321_c4_g3_m.11042	509	K	TRINITY_DN105321_c4_g3|g.11042 ORF TRINITY_DN105321_c4_g3|g.11042 TRINITY_DN105321_c4_g3_m.11042 type:complete len:749 (+) TRINITY_DN105321_c4_g3:556-2802(+)	1	0.0359887	40.203	LK(1)LDLNR	2	-12.428	1
TRINITY_DN105325_c0_g1_m.11046	682	K	TRINITY_DN105325_c0_g1|g.11046 ORF TRINITY_DN105325_c0_g1|g.11046 TRINITY_DN105325_c0_g1_m.11046 type:complete len:980 (+) TRINITY_DN105325_c0_g1:399-3338(+)	1	6.08644e-06	74.62	LQEATDADNK(1)VQELEK	2	-1.5913	1
TRINITY_DN105325_c0_g1_m.11046	672	K	TRINITY_DN105325_c0_g1|g.11046 ORF TRINITY_DN105325_c0_g1|g.11046 TRINITY_DN105325_c0_g1_m.11046 type:complete len:980 (+) TRINITY_DN105325_c0_g1:399-3338(+)	1	5.83315e-09	118.26	ALNSK(1)LQEATDADNK	2	-1.1961	1
TRINITY_DN105344_c7_g1_m.11078	100	K	TRINITY_DN105344_c7_g1|g.11078 ORF TRINITY_DN105344_c7_g1|g.11078 TRINITY_DN105344_c7_g1_m.11078 type:5prime_partial len:250 (+) TRINITY_DN105344_c7_g1:1-750(+)	1	9.51215e-05	97.277	GFTVK(1)QFQELR	2	-0.047182	1
TRINITY_DN105363_c1_g17_m.11137	88	K	TRINITY_DN105363_c1_g17|g.11137 ORF TRINITY_DN105363_c1_g17|g.11137 TRINITY_DN105363_c1_g17_m.11137 type:internal len:280 (+) TRINITY_DN105363_c1_g17:2-838(+)	1	2.61288e-05	103.23	FHK(1)LPNLTGNIPSSITR	3	-1.5764	1
TRINITY_DN105395_c2_g2_m.11198	134	K	TRINITY_DN105395_c2_g2|g.11198 ORF TRINITY_DN105395_c2_g2|g.11198 TRINITY_DN105395_c2_g2_m.11198 type:complete len:345 (+) TRINITY_DN105395_c2_g2:535-1569(+)	1	2.1537e-07	87.573	DVQEIFK(1)MTPHDK	2	-0.73272	1
TRINITY_DN105407_c5_g1_m.11236	140	K	TRINITY_DN105407_c5_g1|g.11236 ORF TRINITY_DN105407_c5_g1|g.11236 TRINITY_DN105407_c5_g1_m.11236 type:complete len:323 (+) TRINITY_DN105407_c5_g1:37-1005(+)	1	0.0029507	69.641	ANEK(1)IESATDILK	2	3.5693	1
TRINITY_DN105416_c5_g1_m.11260	289	K	TRINITY_DN105416_c5_g1|g.11260 ORF TRINITY_DN105416_c5_g1|g.11260 TRINITY_DN105416_c5_g1_m.11260 type:complete len:308 (+) TRINITY_DN105416_c5_g1:75-998(+)	1	0.000332689	69.716	IQFSK(1)NPFGR	2	-0.706	1
TRINITY_DN105430_c5_g1_m.11282	434	K	TRINITY_DN105430_c5_g1|g.11282 ORF TRINITY_DN105430_c5_g1|g.11282 TRINITY_DN105430_c5_g1_m.11282 type:5prime_partial len:514 (+) TRINITY_DN105430_c5_g1:3-1544(+)	1	0.0195937	56.091	FIGEEGK(1)R	2	1.2591	1
TRINITY_DN105430_c5_g1_m.11282	53	K	TRINITY_DN105430_c5_g1|g.11282 ORF TRINITY_DN105430_c5_g1|g.11282 TRINITY_DN105430_c5_g1_m.11282 type:5prime_partial len:514 (+) TRINITY_DN105430_c5_g1:3-1544(+)	1	0.0547447	40.83	SIPGSYGFPLLGPLK(1)DR	2	1.8626	1
TRINITY_DN105430_c5_g1_m.11282	347	K	TRINITY_DN105430_c5_g1|g.11282 ORF TRINITY_DN105430_c5_g1|g.11282 TRINITY_DN105430_c5_g1_m.11282 type:5prime_partial len:514 (+) TRINITY_DN105430_c5_g1:3-1544(+)	1	0.000169428	76.255	SEK(1)GVVGFEELK	2	1.8779	1
TRINITY_DN105430_c5_g1_m.11282	76	K	TRINITY_DN105430_c5_g1|g.11282 ORF TRINITY_DN105430_c5_g1|g.11282 TRINITY_DN105430_c5_g1_m.11282 type:5prime_partial len:514 (+) TRINITY_DN105430_c5_g1:3-1544(+)	1	0.007112	78.932	MEAHK(1)SPVFR	2	-0.47133	1
TRINITY_DN105462_c1_g2_m.11380	87	K	TRINITY_DN105462_c1_g2|g.11380 ORF TRINITY_DN105462_c1_g2|g.11380 TRINITY_DN105462_c1_g2_m.11380 type:3prime_partial len:336 (+) TRINITY_DN105462_c1_g2:167-1171(+)	1	1.92149e-09	111.98	FIGSVLSGGGSVPAPK(1)ASVK	2	-2.9474	1
TRINITY_DN105462_c1_g2_m.11380	296	K	TRINITY_DN105462_c1_g2|g.11380 ORF TRINITY_DN105462_c1_g2|g.11380 TRINITY_DN105462_c1_g2_m.11380 type:3prime_partial len:336 (+) TRINITY_DN105462_c1_g2:167-1171(+)	1	4.31282e-06	62.398	MHENHYLLTDFLK(1)NK	3	-0.71278	1
TRINITY_DN105462_c1_g2_m.11380	148	K	TRINITY_DN105462_c1_g2|g.11380 ORF TRINITY_DN105462_c1_g2|g.11380 TRINITY_DN105462_c1_g2_m.11380 type:3prime_partial len:336 (+) TRINITY_DN105462_c1_g2:167-1171(+)	1	0.00530532	88.35	DPALVK(1)R	2	0.127	1
TRINITY_DN105491_c1_g2_m.11433	183	K	TRINITY_DN105491_c1_g2|g.11433 ORF TRINITY_DN105491_c1_g2|g.11433 TRINITY_DN105491_c1_g2_m.11433 type:complete len:213 (+) TRINITY_DN105491_c1_g2:67-705(+)	1	0.000237143	64.21	GLADFTQK(1)LNSAVTDLEK	2	4.5002	1
TRINITY_DN105549_c2_g3_m.11545	800	K	TRINITY_DN105549_c2_g3|g.11545 ORF TRINITY_DN105549_c2_g3|g.11545 TRINITY_DN105549_c2_g3_m.11545 type:complete len:823 (+) TRINITY_DN105549_c2_g3:152-2620(+)	1	0.0667436	40.386	MPELK(1)GLVLK	2	0.75499	1
TRINITY_DN105607_c0_g13_m.11654	59	K	TRINITY_DN105607_c0_g13|g.11654 ORF TRINITY_DN105607_c0_g13|g.11654 TRINITY_DN105607_c0_g13_m.11654 type:internal len:133 (+) TRINITY_DN105607_c0_g13:2-397(+)	1	1.59172e-06	158.57	ETDLSQEK(1)TR	2	1.0139	1
TRINITY_DN105607_c0_g15_m.11655	92	K	TRINITY_DN105607_c0_g15|g.11655 ORF TRINITY_DN105607_c0_g15|g.11655 TRINITY_DN105607_c0_g15_m.11655 type:5prime_partial len:126 (+) TRINITY_DN105607_c0_g15:2-379(+)	1	0.0336252	51.864	NLK(1)QSLER	2	-0.23497	1
TRINITY_DN105607_c0_g7_m.11659	182	K	TRINITY_DN105607_c0_g7|g.11659 ORF TRINITY_DN105607_c0_g7|g.11659 TRINITY_DN105607_c0_g7_m.11659 type:internal len:614 (+) TRINITY_DN105607_c0_g7:1-1839(+)	1	0.00680615	50.314	TLDLYK(1)EYFAVPYPLPK	2	2.1885	1
TRINITY_DN105607_c0_g7_m.11659	354	K	TRINITY_DN105607_c0_g7|g.11659 ORF TRINITY_DN105607_c0_g7|g.11659 TRINITY_DN105607_c0_g7_m.11659 type:internal len:614 (+) TRINITY_DN105607_c0_g7:1-1839(+)	1	0.000487506	117.18	SLASYVK(1)R	2	0.14734	1
TRINITY_DN105607_c0_g7_m.11659	499	K	TRINITY_DN105607_c0_g7|g.11659 ORF TRINITY_DN105607_c0_g7|g.11659 TRINITY_DN105607_c0_g7_m.11659 type:internal len:614 (+) TRINITY_DN105607_c0_g7:1-1839(+)	1	0.0176575	68.548	YAIENNK(1)LSATDR	2	-4.9822	1
TRINITY_DN105607_c0_g7_m.11659	232	K	TRINITY_DN105607_c0_g7|g.11659 ORF TRINITY_DN105607_c0_g7|g.11659 TRINITY_DN105607_c0_g7_m.11659 type:internal len:614 (+) TRINITY_DN105607_c0_g7:1-1839(+)	1	0.00683396	67.464	HSAAANK(1)QR	2	-0.48344	1
TRINITY_DN105607_c0_g7_m.11659	587	K	TRINITY_DN105607_c0_g7|g.11659 ORF TRINITY_DN105607_c0_g7|g.11659 TRINITY_DN105607_c0_g7_m.11659 type:internal len:614 (+) TRINITY_DN105607_c0_g7:1-1839(+)	1	0.000489533	46.206	LGWDPK(1)EGESHLDAMLR	3	-3.938	1
TRINITY_DN105712_c0_g3_m.11855	384	K	TRINITY_DN105712_c0_g3|g.11855 ORF TRINITY_DN105712_c0_g3|g.11855 TRINITY_DN105712_c0_g3_m.11855 type:complete len:617 (+) TRINITY_DN105712_c0_g3:226-2076(+)	1	3.09997e-07	95.138	IHDEDDK(1)TVSIR	2	-0.8307	1
TRINITY_DN105712_c0_g3_m.11855	563	K	TRINITY_DN105712_c0_g3|g.11855 ORF TRINITY_DN105712_c0_g3|g.11855 TRINITY_DN105712_c0_g3_m.11855 type:complete len:617 (+) TRINITY_DN105712_c0_g3:226-2076(+)	1	5.57962e-05	92.707	VLGK(1)GGSNLANIR	2	-4.705	1
TRINITY_DN105712_c0_g3_m.11855	395	K	TRINITY_DN105712_c0_g3|g.11855 ORF TRINITY_DN105712_c0_g3|g.11855 TRINITY_DN105712_c0_g3_m.11855 type:complete len:617 (+) TRINITY_DN105712_c0_g3:226-2076(+)	1	0.0120247	47.334	LLVPTK(1)VIGCLIGK	2	0.95006	1
TRINITY_DN105712_c0_g3_m.11855	602	K	TRINITY_DN105712_c0_g3|g.11855 ORF TRINITY_DN105712_c0_g3|g.11855 TRINITY_DN105712_c0_g3_m.11855 type:complete len:617 (+) TRINITY_DN105712_c0_g3:226-2076(+)	1	3.5343e-10	141.44	IAQISGTPDQK(1)R	2	-1.8641	1
TRINITY_DN105712_c0_g3_m.11855	70	K	TRINITY_DN105712_c0_g3|g.11855 ORF TRINITY_DN105712_c0_g3|g.11855 TRINITY_DN105712_c0_g3_m.11855 type:complete len:617 (+) TRINITY_DN105712_c0_g3:226-2076(+)	1	0.0065521	55.754	IK(1)VVDPYPGAQK	2	-0.6551	1
TRINITY_DN105712_c0_g3_m.11855	428	K	TRINITY_DN105712_c0_g3|g.11855 ORF TRINITY_DN105712_c0_g3|g.11855 TRINITY_DN105712_c0_g3_m.11855 type:complete len:617 (+) TRINITY_DN105712_c0_g3:226-2076(+)	1	0.0025547	78.932	AK(1)SASSDEER	2	-0.17541	1
TRINITY_DN105712_c0_g3_m.11855	80	K	TRINITY_DN105712_c0_g3|g.11855 ORF TRINITY_DN105712_c0_g3|g.11855 TRINITY_DN105712_c0_g3_m.11855 type:complete len:617 (+) TRINITY_DN105712_c0_g3:226-2076(+)	1	0.0195208	60.892	VVDPYPGAQK(1)R	2	0.59269	1
TRINITY_DN105732_c1_g1_m.11905	271	K	TRINITY_DN105732_c1_g1|g.11905 ORF TRINITY_DN105732_c1_g1|g.11905 TRINITY_DN105732_c1_g1_m.11905 type:5prime_partial len:584 (+) TRINITY_DN105732_c1_g1:2-1753(+)	1	0.000255509	77.358	AVK(1)SHLQTFR	2	-1.4022	1
TRINITY_DN105755_c1_g25_m.11954	38	K	TRINITY_DN105755_c1_g25|g.11954 ORF TRINITY_DN105755_c1_g25|g.11954 TRINITY_DN105755_c1_g25_m.11954 type:5prime_partial len:572 (+) TRINITY_DN105755_c1_g25:2-1717(+)	1	0.013554	62.88	QK(1)NFDLQK	2	9.055	1
TRINITY_DN105784_c0_g1_m.12019	379	K	TRINITY_DN105784_c0_g1|g.12019 ORF TRINITY_DN105784_c0_g1|g.12019 TRINITY_DN105784_c0_g1_m.12019 type:complete len:498 (+) TRINITY_DN105784_c0_g1:357-1850(+)	1	6.21943e-08	110.58	LK(1)DILGISNTSFK	2	0.22251	1
TRINITY_DN105855_c0_g1_m.12142	183	K	TRINITY_DN105855_c0_g1|g.12142 ORF TRINITY_DN105855_c0_g1|g.12142 TRINITY_DN105855_c0_g1_m.12142 type:5prime_partial len:1031 (+) TRINITY_DN105855_c0_g1:1-3093(+)	1	0.00194896	72.355	LPIFYK(1)QR	2	-1.2488	1
TRINITY_DN105856_c0_g3_m.12150	109	K	TRINITY_DN105856_c0_g3|g.12150 ORF TRINITY_DN105856_c0_g3|g.12150 TRINITY_DN105856_c0_g3_m.12150 type:5prime_partial len:335 (+) TRINITY_DN105856_c0_g3:2-1006(+)	1	2.85423e-06	140.05	EVVDQTVMNK(1)K	2	-2.469	2
TRINITY_DN105856_c0_g3_m.12150	99	K	TRINITY_DN105856_c0_g3|g.12150 ORF TRINITY_DN105856_c0_g3|g.12150 TRINITY_DN105856_c0_g3_m.12150 type:5prime_partial len:335 (+) TRINITY_DN105856_c0_g3:2-1006(+)	1	0.00143188	87.942	QK(1)EVVDQTVMNK	2	-0.31792	1
TRINITY_DN105856_c0_g3_m.12150	88	K	TRINITY_DN105856_c0_g3|g.12150 ORF TRINITY_DN105856_c0_g3|g.12150 TRINITY_DN105856_c0_g3_m.12150 type:5prime_partial len:335 (+) TRINITY_DN105856_c0_g3:2-1006(+)	1	0.0260708	49.097	TESSVSK(1)LMAVLSAAK	2	1.5548	1
TRINITY_DN105856_c0_g3_m.12150	97	K	TRINITY_DN105856_c0_g3|g.12150 ORF TRINITY_DN105856_c0_g3|g.12150 TRINITY_DN105856_c0_g3_m.12150 type:5prime_partial len:335 (+) TRINITY_DN105856_c0_g3:2-1006(+)	1	0.00132127	83.623	LMAVLSAAK(1)QK	2	3.1303	1
TRINITY_DN105856_c0_g3_m.12150	211	K	TRINITY_DN105856_c0_g3|g.12150 ORF TRINITY_DN105856_c0_g3|g.12150 TRINITY_DN105856_c0_g3_m.12150 type:5prime_partial len:335 (+) TRINITY_DN105856_c0_g3:2-1006(+)	1	0.00273599	93.561	NHLK(1)VGLK	2	0.2431	1
TRINITY_DN105856_c0_g3_m.12150	135	K	TRINITY_DN105856_c0_g3|g.12150 ORF TRINITY_DN105856_c0_g3|g.12150 TRINITY_DN105856_c0_g3_m.12150 type:5prime_partial len:335 (+) TRINITY_DN105856_c0_g3:2-1006(+)	1	0.00154736	57.293	AIQK(1)MEADETK	2	0.172	1
TRINITY_DN105870_c1_g6_m.12180	205	K	TRINITY_DN105870_c1_g6|g.12180 ORF TRINITY_DN105870_c1_g6|g.12180 TRINITY_DN105870_c1_g6_m.12180 type:internal len:603 (+) TRINITY_DN105870_c1_g6:1-1806(+)	1	3.15668e-21	195.3	ALLEQK(1)DGLAR	2	1.6256	2
TRINITY_DN105870_c1_g6_m.12180	188	K	TRINITY_DN105870_c1_g6|g.12180 ORF TRINITY_DN105870_c1_g6|g.12180 TRINITY_DN105870_c1_g6_m.12180 type:internal len:603 (+) TRINITY_DN105870_c1_g6:1-1806(+)	1	6.09526e-17	142.51	TSK(1)QQVVETEHLMK	2	-1.8699	1
TRINITY_DN105870_c1_g6_m.12180	300	K	TRINITY_DN105870_c1_g6|g.12180 ORF TRINITY_DN105870_c1_g6|g.12180 TRINITY_DN105870_c1_g6_m.12180 type:internal len:603 (+) TRINITY_DN105870_c1_g6:1-1806(+)	1	0.0140222	42.075	DLK(1)DAVLAVR	2	-1.5709	1
TRINITY_DN105870_c1_g9_m.12181	165	K	TRINITY_DN105870_c1_g9|g.12181 ORF TRINITY_DN105870_c1_g9|g.12181 TRINITY_DN105870_c1_g9_m.12181 type:internal len:306 (+) TRINITY_DN105870_c1_g9:1-915(+)	1	3.10443e-10	128.97	DK(1)LVSLEEVLHK	2	0.92812	1
TRINITY_DN105870_c1_g9_m.12181	175	K	TRINITY_DN105870_c1_g9|g.12181 ORF TRINITY_DN105870_c1_g9|g.12181 TRINITY_DN105870_c1_g9_m.12181 type:internal len:306 (+) TRINITY_DN105870_c1_g9:1-915(+)	1	5.17363e-21	213.45	LVSLEEVLHK(1)R	2	-2.5539	1
TRINITY_DN105870_c1_g9_m.12181	5	K	TRINITY_DN105870_c1_g9|g.12181 ORF TRINITY_DN105870_c1_g9|g.12181 TRINITY_DN105870_c1_g9_m.12181 type:internal len:306 (+) TRINITY_DN105870_c1_g9:1-915(+)	1	0.0540901	58.916	LK(1)MEITSK	2	0.60248	1
TRINITY_DN105877_c16_g1_m.12207	52	K	TRINITY_DN105877_c16_g1|g.12207 ORF TRINITY_DN105877_c16_g1|g.12207 TRINITY_DN105877_c16_g1_m.12207 type:internal len:424 (+) TRINITY_DN105877_c16_g1:2-1270(+)	1	3.63109e-22	199.4	GNDLQAVALK(1)FR	2	-2.8443	1
TRINITY_DN105877_c16_g1_m.12207	131	K	TRINITY_DN105877_c16_g1|g.12207 ORF TRINITY_DN105877_c16_g1|g.12207 TRINITY_DN105877_c16_g1_m.12207 type:internal len:424 (+) TRINITY_DN105877_c16_g1:2-1270(+)	1	3.22162e-22	110.99	HHLQTLLNEDQLDSALK(1)ILISHTLELPSHR	4	0.27806	1
TRINITY_DN105877_c16_g1_m.12207	77	K	TRINITY_DN105877_c16_g1|g.12207 ORF TRINITY_DN105877_c16_g1|g.12207 TRINITY_DN105877_c16_g1_m.12207 type:internal len:424 (+) TRINITY_DN105877_c16_g1:2-1270(+)	1	0.00825951	78.932	YKDDEGK(1)FK	2	0.46852	1
TRINITY_DN105877_c16_g1_m.12207	302	K	TRINITY_DN105877_c16_g1|g.12207 ORF TRINITY_DN105877_c16_g1|g.12207 TRINITY_DN105877_c16_g1_m.12207 type:internal len:424 (+) TRINITY_DN105877_c16_g1:2-1270(+)	1	8.52954e-05	72.031	TLQDFNNELTSHGK(1)SYR	2	-2.4028	2
TRINITY_DN105877_c16_g1_m.12207	72	K	TRINITY_DN105877_c16_g1|g.12207 ORF TRINITY_DN105877_c16_g1|g.12207 TRINITY_DN105877_c16_g1_m.12207 type:internal len:424 (+) TRINITY_DN105877_c16_g1:2-1270(+)	1	0.0304368	65.313	YK(1)DDEGK	2	2.2006	1
TRINITY_DN105877_c16_g1_m.12207	280	K	TRINITY_DN105877_c16_g1|g.12207 ORF TRINITY_DN105877_c16_g1|g.12207 TRINITY_DN105877_c16_g1_m.12207 type:internal len:424 (+) TRINITY_DN105877_c16_g1:2-1270(+)	1	0.00346256	46.447	EYLK(1)IHFQNFNK	3	-2.2909	1
TRINITY_DN105877_c16_g1_m.12207	399	K	TRINITY_DN105877_c16_g1|g.12207 ORF TRINITY_DN105877_c16_g1|g.12207 TRINITY_DN105877_c16_g1_m.12207 type:internal len:424 (+) TRINITY_DN105877_c16_g1:2-1270(+)	1	0.000784743	63.908	MRDDVVSHEFEQK(1)R	3	-0.020089	2
TRINITY_DN105881_c0_g1_m.12216	77	K	TRINITY_DN105881_c0_g1|g.12216 ORF TRINITY_DN105881_c0_g1|g.12216 TRINITY_DN105881_c0_g1_m.12216 type:complete len:237 (+) TRINITY_DN105881_c0_g1:9224-9934(+)	1	0.0133226	51.43	FLIVGTK(1)K	2	-3.1246	1
TRINITY_DN105897_c1_g2_m.12268	47	K	TRINITY_DN105897_c1_g2|g.12268 ORF TRINITY_DN105897_c1_g2|g.12268 TRINITY_DN105897_c1_g2_m.12268 type:complete len:113 (+) TRINITY_DN105897_c1_g2:1105-1443(+)	1	0.0152998	58.889	AIEEK(1)ISGEQR	2	-0.95069	1
TRINITY_DN105905_c12_g34_m.12294	121	K	TRINITY_DN105905_c12_g34|g.12294 ORF TRINITY_DN105905_c12_g34|g.12294 TRINITY_DN105905_c12_g34_m.12294 type:internal len:147 (+) TRINITY_DN105905_c12_g34:3-440(+)	1	0.0588631	43.272	FSEGVSK(1)ATK	2	-1.1693	1
TRINITY_DN105911_c8_g2_m.12314	253	K	TRINITY_DN105911_c8_g2|g.12314 ORF TRINITY_DN105911_c8_g2|g.12314 TRINITY_DN105911_c8_g2_m.12314 type:complete len:322 (+) TRINITY_DN105911_c8_g2:204-1169(+)	1	3.77696e-08	95.345	GGENIK(1)NMQATTGAR	2	-2.6271	1
TRINITY_DN105911_c8_g2_m.12314	247	K	TRINITY_DN105911_c8_g2|g.12314 ORF TRINITY_DN105911_c8_g2|g.12314 TRINITY_DN105911_c8_g2_m.12314 type:complete len:322 (+) TRINITY_DN105911_c8_g2:204-1169(+)	1	0.0097301	61.577	VGLIIGK(1)GGENIK	2	-0.20859	1
TRINITY_DN105985_c12_g6_m.12448	334	K	TRINITY_DN105985_c12_g6|g.12448 ORF TRINITY_DN105985_c12_g6|g.12448 TRINITY_DN105985_c12_g6_m.12448 type:3prime_partial len:408 (+) TRINITY_DN105985_c12_g6:141-1361(+)	1	0.0737443	40.502	NLQTK(1)TGAR	2	0.30639	1
TRINITY_DN106262_c0_g1_m.12661	109	K	TRINITY_DN106262_c0_g1|g.12661 ORF TRINITY_DN106262_c0_g1|g.12661 TRINITY_DN106262_c0_g1_m.12661 type:complete len:147 (+) TRINITY_DN106262_c0_g1:110-550(+)	1	0.0150607	69.905	EVK(1)DIFIR	2	-0.75011	1
TRINITY_DN106262_c0_g1_m.12661	50	K	TRINITY_DN106262_c0_g1|g.12661 ORF TRINITY_DN106262_c0_g1|g.12661 TRINITY_DN106262_c0_g1_m.12661 type:complete len:147 (+) TRINITY_DN106262_c0_g1:110-550(+)	1	4.96915e-06	98.865	YK(1)AFEPILLAGVER	2	1.0321	1
TRINITY_DN106262_c0_g1_m.12661	77	K	TRINITY_DN106262_c0_g1|g.12661 ORF TRINITY_DN106262_c0_g1|g.12661 TRINITY_DN106262_c0_g1_m.12661 type:complete len:147 (+) TRINITY_DN106262_c0_g1:110-550(+)	1	0.000783039	101.48	GGGK(1)TSQIYAIR	2	-2.239	1
TRINITY_DN106262_c0_g1_m.12661	26	K	TRINITY_DN106262_c0_g1|g.12661 ORF TRINITY_DN106262_c0_g1|g.12661 TRINITY_DN106262_c0_g1_m.12661 type:complete len:147 (+) TRINITY_DN106262_c0_g1:110-550(+)	1	0.00157629	79.311	TAVAVTHCK(1)AGK	2	-1.991	1
TRINITY_DN106508_c0_g1_m.12680	92	K	TRINITY_DN106508_c0_g1|g.12680 ORF TRINITY_DN106508_c0_g1|g.12680 TRINITY_DN106508_c0_g1_m.12680 type:complete len:385 (+) TRINITY_DN106508_c0_g1:156-1310(+)	0.999962	3.73644e-06	52.149	LKDFIHISDFDK(1)ETIMR	3	-0.53278	1
TRINITY_DN106508_c0_g1_m.12680	282	K	TRINITY_DN106508_c0_g1|g.12680 ORF TRINITY_DN106508_c0_g1|g.12680 TRINITY_DN106508_c0_g1_m.12680 type:complete len:385 (+) TRINITY_DN106508_c0_g1:156-1310(+)	1	0.000121027	110.58	SAGISK(1)IVLTDNPR	2	0.17187	1
TRINITY_DN106508_c0_g1_m.12680	101	K	TRINITY_DN106508_c0_g1|g.12680 ORF TRINITY_DN106508_c0_g1|g.12680 TRINITY_DN106508_c0_g1_m.12680 type:complete len:385 (+) TRINITY_DN106508_c0_g1:156-1310(+)	1	0.0182808	60.892	ILQK(1)ASEVK	2	-1.2763	1
TRINITY_DN10790_c0_g1_m.12825	70	K	TRINITY_DN10790_c0_g1|g.12825 ORF TRINITY_DN10790_c0_g1|g.12825 TRINITY_DN10790_c0_g1_m.12825 type:3prime_partial len:165 (+) TRINITY_DN10790_c0_g1:77-568(+)	1	0.00227201	41.317	NQVAMNPANTVFDAK(1)R	2	-1.7042	1
TRINITY_DN11192_c0_g2_m.13091	348	K	TRINITY_DN11192_c0_g2|g.13091 ORF TRINITY_DN11192_c0_g2|g.13091 TRINITY_DN11192_c0_g2_m.13091 type:complete len:426 (+) TRINITY_DN11192_c0_g2:215-1492(+)	1	0.00122241	85.716	TQIFK(1)IHTR	2	-0.60728	1
TRINITY_DN11192_c0_g2_m.13091	42	K	TRINITY_DN11192_c0_g2|g.13091 ORF TRINITY_DN11192_c0_g2|g.13091 TRINITY_DN11192_c0_g2_m.13091 type:complete len:426 (+) TRINITY_DN11192_c0_g2:215-1492(+)	0.987724	0.0486149	84.368	K(0.012)VEK(0.988)EIK	2	0.43547	1
TRINITY_DN11192_c0_g2_m.13091	102	K	TRINITY_DN11192_c0_g2|g.13091 ORF TRINITY_DN11192_c0_g2|g.13091 TRINITY_DN11192_c0_g2_m.13091 type:complete len:426 (+) TRINITY_DN11192_c0_g2:215-1492(+)	1	0.000423159	78.157	IINPNTEDAK(1)YVINVK	2	-2.2834	1
TRINITY_DN11192_c0_g2_m.13091	108	K	TRINITY_DN11192_c0_g2|g.13091 ORF TRINITY_DN11192_c0_g2|g.13091 TRINITY_DN11192_c0_g2_m.13091 type:complete len:426 (+) TRINITY_DN11192_c0_g2:215-1492(+)	1	0.0103459	53.878	YVINVK(1)QIAK	2	0.37516	1
TRINITY_DN116059_c0_g1_m.13447	97	K	TRINITY_DN116059_c0_g1|g.13447 ORF TRINITY_DN116059_c0_g1|g.13447 TRINITY_DN116059_c0_g1_m.13447 type:internal len:125 (+) TRINITY_DN116059_c0_g1:1-372(+)	1	0.00703192	43.306	ILYGGSVNEK(1)NCGELSK	2	-2.6908	1
TRINITY_DN119962_c0_g1_m.13762	22	K	TRINITY_DN119962_c0_g1|g.13762 ORF TRINITY_DN119962_c0_g1|g.13762 TRINITY_DN119962_c0_g1_m.13762 type:5prime_partial len:130 (-) TRINITY_DN119962_c0_g1:21-410(-)	1	0.00735185	64.547	LFGLLK(1)AR	2	-2.0631	1
TRINITY_DN128853_c0_g1_m.14381	127	K	TRINITY_DN128853_c0_g1|g.14381 ORF TRINITY_DN128853_c0_g1|g.14381 TRINITY_DN128853_c0_g1_m.14381 type:complete len:174 (+) TRINITY_DN128853_c0_g1:184-705(+)	1	3.56774e-13	181.87	LEK(1)EIAEVQELK	2	3.9652	1
TRINITY_DN128853_c0_g1_m.14381	120	K	TRINITY_DN128853_c0_g1|g.14381 ORF TRINITY_DN128853_c0_g1|g.14381 TRINITY_DN128853_c0_g1_m.14381 type:complete len:174 (+) TRINITY_DN128853_c0_g1:184-705(+)	1	0.000885626	73.655	EAEQTSLK(1)ETER	2	-0.9957	1
TRINITY_DN128853_c0_g1_m.14381	138	K	TRINITY_DN128853_c0_g1|g.14381 ORF TRINITY_DN128853_c0_g1|g.14381 TRINITY_DN128853_c0_g1_m.14381 type:complete len:174 (+) TRINITY_DN128853_c0_g1:184-705(+)	1	0.000921742	67.548	QK(1)ICTMTAEEYFQK	2	-2.407	1
TRINITY_DN128853_c0_g1_m.14381	15	K	TRINITY_DN128853_c0_g1|g.14381 ORF TRINITY_DN128853_c0_g1|g.14381 TRINITY_DN128853_c0_g1_m.14381 type:complete len:174 (+) TRINITY_DN128853_c0_g1:184-705(+)	1	0.0056847	78.864	VVETAVK(1)ATK	2	-0.65697	2
TRINITY_DN128853_c0_g1_m.14381	81	K	TRINITY_DN128853_c0_g1|g.14381 ORF TRINITY_DN128853_c0_g1|g.14381 TRINITY_DN128853_c0_g1_m.14381 type:complete len:174 (+) TRINITY_DN128853_c0_g1:184-705(+)	1	9.20543e-06	66.509	LVDMYK(1)EAYESVEIPK	2	-2.2957	1
TRINITY_DN128853_c0_g1_m.14381	103	K	TRINITY_DN128853_c0_g1|g.14381 ORF TRINITY_DN128853_c0_g1|g.14381 TRINITY_DN128853_c0_g1_m.14381 type:complete len:174 (+) TRINITY_DN128853_c0_g1:184-705(+)	1	2.44822e-06	115.04	PK(1)FDALLVELK	2	1.259	1
TRINITY_DN128853_c0_g1_m.14381	18	K	TRINITY_DN128853_c0_g1|g.14381 ORF TRINITY_DN128853_c0_g1|g.14381 TRINITY_DN128853_c0_g1_m.14381 type:complete len:174 (+) TRINITY_DN128853_c0_g1:184-705(+)	1	0.000884326	97.594	ATK(1)AIDWDGMAK	2	-1.2561	2
TRINITY_DN128853_c0_g1_m.14381	101	K	TRINITY_DN128853_c0_g1|g.14381 ORF TRINITY_DN128853_c0_g1|g.14381 TRINITY_DN128853_c0_g1_m.14381 type:complete len:174 (+) TRINITY_DN128853_c0_g1:184-705(+)	1	2.34022e-15	171.34	FVDTVTPQYK(1)PK	2	-0.91039	1
TRINITY_DN128853_c0_g1_m.14381	157	K	TRINITY_DN128853_c0_g1|g.14381 ORF TRINITY_DN128853_c0_g1|g.14381 TRINITY_DN128853_c0_g1_m.14381 type:complete len:174 (+) TRINITY_DN128853_c0_g1:184-705(+)	1	0.00738423	87.251	QK(1)FDDEIR	2	0.8701	1
TRINITY_DN129377_c0_g1_m.14438	96	K	TRINITY_DN129377_c0_g1|g.14438 ORF TRINITY_DN129377_c0_g1|g.14438 TRINITY_DN129377_c0_g1_m.14438 type:internal len:150 (-) TRINITY_DN129377_c0_g1:2-448(-)	1	0.000879039	112.8	NHLPSNFK(1)K	2	-0.27969	1
TRINITY_DN135180_c0_g1_m.14871	20	K	TRINITY_DN135180_c0_g1|g.14871 ORF TRINITY_DN135180_c0_g1|g.14871 TRINITY_DN135180_c0_g1_m.14871 type:complete len:143 (+) TRINITY_DN135180_c0_g1:89-517(+)	1	0.0143318	65.404	PQAAPSAAK(1)R	2	-0.31031	1
TRINITY_DN1448_c0_g1_m.15205	74	K	TRINITY_DN1448_c0_g1|g.15205 ORF TRINITY_DN1448_c0_g1|g.15205 TRINITY_DN1448_c0_g1_m.15205 type:complete len:101 (+) TRINITY_DN1448_c0_g1:65-367(+)	1	1.95682e-06	112.93	DTK(1)ESVVGESK	2	1.8434	1
TRINITY_DN1448_c0_g1_m.15205	62	K	TRINITY_DN1448_c0_g1|g.15205 ORF TRINITY_DN1448_c0_g1|g.15205 TRINITY_DN1448_c0_g1_m.15205 type:complete len:101 (+) TRINITY_DN1448_c0_g1:65-367(+)	1	0.00520017	94.806	QK(1)AESLK	2	1.1257	1
TRINITY_DN18481_c0_g2_m.15329	154	K	TRINITY_DN18481_c0_g2|g.15329 ORF TRINITY_DN18481_c0_g2|g.15329 TRINITY_DN18481_c0_g2_m.15329 type:5prime_partial len:186 (+) TRINITY_DN18481_c0_g2:3-560(+)	1	3.99849e-11	154.94	ETNEIFSK(1)HANVK	2	-1.3246	2
TRINITY_DN18481_c0_g2_m.15329	173	K	TRINITY_DN18481_c0_g2|g.15329 ORF TRINITY_DN18481_c0_g2|g.15329 TRINITY_DN18481_c0_g2_m.15329 type:5prime_partial len:186 (+) TRINITY_DN18481_c0_g2:3-560(+)	1	0.0160094	57.293	ESWQK(1)VLEIAK	2	0.31282	1
TRINITY_DN18481_c0_g2_m.15329	111	K	TRINITY_DN18481_c0_g2|g.15329 ORF TRINITY_DN18481_c0_g2|g.15329 TRINITY_DN18481_c0_g2_m.15329 type:5prime_partial len:186 (+) TRINITY_DN18481_c0_g2:3-560(+)	1	0.00561511	77.072	VLK(1)VYDQR	2	1.2581	2
TRINITY_DN20004_c0_g1_m.15386	99	K	TRINITY_DN20004_c0_g1|g.15386 ORF TRINITY_DN20004_c0_g1|g.15386 TRINITY_DN20004_c0_g1_m.15386 type:complete len:116 (+) TRINITY_DN20004_c0_g1:130-477(+)	1	0.000861814	81.163	YFLK(1)FYDSK	2	-1.6173	1
TRINITY_DN20004_c0_g1_m.15386	93	K	TRINITY_DN20004_c0_g1|g.15386 ORF TRINITY_DN20004_c0_g1|g.15386 TRINITY_DN20004_c0_g1_m.15386 type:complete len:116 (+) TRINITY_DN20004_c0_g1:130-477(+)	1	0.0042619	89.123	LSVPK(1)SR	2	-0.3123	1
TRINITY_DN20004_c0_g1_m.15386	88	K	TRINITY_DN20004_c0_g1|g.15386 ORF TRINITY_DN20004_c0_g1|g.15386 TRINITY_DN20004_c0_g1_m.15386 type:complete len:116 (+) TRINITY_DN20004_c0_g1:130-477(+)	1	1.64663e-19	139.7	LSAAIATILETK(1)LSVPK	2	1.9304	2
TRINITY_DN27637_c0_g1_m.15649	84	K	TRINITY_DN27637_c0_g1|g.15649 ORF TRINITY_DN27637_c0_g1|g.15649 TRINITY_DN27637_c0_g1_m.15649 type:complete len:248 (+) TRINITY_DN27637_c0_g1:184-927(+)	1	0.027014	65.156	AK(1)EAMEK	2	1.3564	1
TRINITY_DN27637_c0_g1_m.15649	203	K	TRINITY_DN27637_c0_g1|g.15649 ORF TRINITY_DN27637_c0_g1|g.15649 TRINITY_DN27637_c0_g1_m.15649 type:complete len:248 (+) TRINITY_DN27637_c0_g1:184-927(+)	1	2.01731e-05	145.95	KDDTAAVLK(1)SR	2	-0.18229	1
TRINITY_DN27637_c0_g1_m.15649	28	K	TRINITY_DN27637_c0_g1|g.15649 ORF TRINITY_DN27637_c0_g1|g.15649 TRINITY_DN27637_c0_g1_m.15649 type:complete len:248 (+) TRINITY_DN27637_c0_g1:184-927(+)	1	0.00136254	111.61	MK(1)CASKPDK	2	1.0439	1
TRINITY_DN27637_c0_g1_m.15649	136	K	TRINITY_DN27637_c0_g1|g.15649 ORF TRINITY_DN27637_c0_g1|g.15649 TRINITY_DN27637_c0_g1_m.15649 type:complete len:248 (+) TRINITY_DN27637_c0_g1:184-927(+)	1	0.000677556	96.957	LDDMLAK(1)QGTK	2	-1.0318	1
TRINITY_DN27637_c0_g1_m.15649	129	K	TRINITY_DN27637_c0_g1|g.15649 ORF TRINITY_DN27637_c0_g1|g.15649 TRINITY_DN27637_c0_g1_m.15649 type:complete len:248 (+) TRINITY_DN27637_c0_g1:184-927(+)	1	4.2662e-17	191.95	TVVQAEK(1)LDDMLAK	2	-0.14485	1
TRINITY_DN27637_c0_g1_m.15649	113	K	TRINITY_DN27637_c0_g1|g.15649 ORF TRINITY_DN27637_c0_g1|g.15649 TRINITY_DN27637_c0_g1_m.15649 type:complete len:248 (+) TRINITY_DN27637_c0_g1:184-927(+)	1	0.0482486	55.604	RPSCQK(1)GFILDGFPR	3	-4.7957	1
TRINITY_DN27637_c0_g1_m.15649	47	K	TRINITY_DN27637_c0_g1|g.15649 ORF TRINITY_DN27637_c0_g1|g.15649 TRINITY_DN27637_c0_g1_m.15649 type:complete len:248 (+) TRINITY_DN27637_c0_g1:184-927(+)	1	0.000100564	52.201	LILIGPPGSGK(1)GTQSPIIK	2	1.6683	1
TRINITY_DN27637_c0_g1_m.15649	211	K	TRINITY_DN27637_c0_g1|g.15649 ORF TRINITY_DN27637_c0_g1|g.15649 TRINITY_DN27637_c0_g1_m.15649 type:complete len:248 (+) TRINITY_DN27637_c0_g1:184-927(+)	1	8.41575e-06	91.993	LEAFHK(1)QTEPVIAYYSK	2	-1.0939	2
TRINITY_DN29739_c0_g7_m.15740	62	K	TRINITY_DN29739_c0_g7|g.15740 ORF TRINITY_DN29739_c0_g7|g.15740 TRINITY_DN29739_c0_g7_m.15740 type:5prime_partial len:133 (+) TRINITY_DN29739_c0_g7:2-400(+)	1	0.000178223	70.552	TK(1)FDSGTGWPSYYEPIR	2	1.1347	1
TRINITY_DN31668_c0_g2_m.15793	63	K	TRINITY_DN31668_c0_g2|g.15793 ORF TRINITY_DN31668_c0_g2|g.15793 TRINITY_DN31668_c0_g2_m.15793 type:internal len:112 (-) TRINITY_DN31668_c0_g2:2-334(-)	1	3.59166e-09	92.747	WSSSTSTTGGAPTIPLYK(1)K	2	-3.7535	1
TRINITY_DN34687_c0_g1_m.15911	30	K	TRINITY_DN34687_c0_g1|g.15911 ORF TRINITY_DN34687_c0_g1|g.15911 TRINITY_DN34687_c0_g1_m.15911 type:5prime_partial len:100 (-) TRINITY_DN34687_c0_g1:90-389(-)	1	0.00404971	98.009	ENVAK(1)QGLPK	2	-0.0043049	1
TRINITY_DN42304_c0_g1_m.16189	278	K	TRINITY_DN42304_c0_g1|g.16189 ORF TRINITY_DN42304_c0_g1|g.16189 TRINITY_DN42304_c0_g1_m.16189 type:complete len:382 (+) TRINITY_DN42304_c0_g1:251-1396(+)	1	1.29942e-05	89.636	IIPGYGGGMSSAK(1)AALESDTR	2	1.787	1
TRINITY_DN42304_c0_g1_m.16189	314	K	TRINITY_DN42304_c0_g1|g.16189 ORF TRINITY_DN42304_c0_g1|g.16189 TRINITY_DN42304_c0_g1_m.16189 type:complete len:382 (+) TRINITY_DN42304_c0_g1:251-1396(+)	1	0.00736383	60.547	AAK(1)AIGFIEK	2	-2.7021	1
TRINITY_DN4821_c0_g2_m.16446	43	K	TRINITY_DN4821_c0_g2|g.16446 ORF TRINITY_DN4821_c0_g2|g.16446 TRINITY_DN4821_c0_g2_m.16446 type:internal len:116 (+) TRINITY_DN4821_c0_g2:2-346(+)	1	3.25517e-05	76.255	LPASK(1)EVGAASDR	2	-0.73348	1
TRINITY_DN49720_c0_g1_m.16526	114	K	TRINITY_DN49720_c0_g1|g.16526 ORF TRINITY_DN49720_c0_g1|g.16526 TRINITY_DN49720_c0_g1_m.16526 type:complete len:169 (+) TRINITY_DN49720_c0_g1:76-582(+)	1	0.0286058	43.734	VVK(1)IDTEK	2	-0.016487	1
TRINITY_DN50714_c0_g3_m.16590	145	K	TRINITY_DN50714_c0_g3|g.16590 ORF TRINITY_DN50714_c0_g3|g.16590 TRINITY_DN50714_c0_g3_m.16590 type:5prime_partial len:162 (+) TRINITY_DN50714_c0_g3:1-486(+)	1	1.51817e-09	80.128	ELQEFK(1)HTGDGESADLGAK	3	-0.27255	1
TRINITY_DN50714_c0_g3_m.16590	139	K	TRINITY_DN50714_c0_g3|g.16590 ORF TRINITY_DN50714_c0_g3|g.16590 TRINITY_DN50714_c0_g3_m.16590 type:5prime_partial len:162 (+) TRINITY_DN50714_c0_g3:1-486(+)	1	2.38977e-07	117.21	PWLNHK(1)ELQEFK	2	-0.042958	4
TRINITY_DN50714_c0_g3_m.16590	102	K	TRINITY_DN50714_c0_g3|g.16590 ORF TRINITY_DN50714_c0_g3|g.16590 TRINITY_DN50714_c0_g3_m.16590 type:5prime_partial len:162 (+) TRINITY_DN50714_c0_g3:1-486(+)	1	1.78206e-11	78.925	AK(1)EQVVAGTLYHLTLEAIDAGIK	3	1.1547	1
TRINITY_DN51048_c0_g1_m.16604	353	K	TRINITY_DN51048_c0_g1|g.16604 ORF TRINITY_DN51048_c0_g1|g.16604 TRINITY_DN51048_c0_g1_m.16604 type:complete len:391 (+) TRINITY_DN51048_c0_g1:429-1601(+)	1	7.12307e-13	123.99	GQPENVETAQK(1)ALLIR	2	-1.9436	1
TRINITY_DN51048_c0_g1_m.16604	272	K	TRINITY_DN51048_c0_g1|g.16604 ORF TRINITY_DN51048_c0_g1|g.16604 TRINITY_DN51048_c0_g1_m.16604 type:complete len:391 (+) TRINITY_DN51048_c0_g1:429-1601(+)	1	0.00505966	78.932	EK(1)ASPETIAK	2	0.35642	1
TRINITY_DN51048_c0_g1_m.16604	360	K	TRINITY_DN51048_c0_g1|g.16604 ORF TRINITY_DN51048_c0_g1|g.16604 TRINITY_DN51048_c0_g1_m.16604 type:complete len:391 (+) TRINITY_DN51048_c0_g1:429-1601(+)	1	0.00090116	81.163	AK(1)ANSMAQLGR	2	1.5666	2
TRINITY_DN51048_c0_g1_m.16604	342	K	TRINITY_DN51048_c0_g1|g.16604 ORF TRINITY_DN51048_c0_g1|g.16604 TRINITY_DN51048_c0_g1_m.16604 type:complete len:391 (+) TRINITY_DN51048_c0_g1:429-1601(+)	1	5.54993e-17	145.08	TWK(1)GQPENVETAQK	2	-2.0245	1
TRINITY_DN51048_c0_g1_m.16604	287	K	TRINITY_DN51048_c0_g1|g.16604 ORF TRINITY_DN51048_c0_g1|g.16604 TRINITY_DN51048_c0_g1_m.16604 type:complete len:391 (+) TRINITY_DN51048_c0_g1:429-1601(+)	1	0.02513	58.286	YTLTMLK(1)R	2	-2.8574	1
TRINITY_DN51048_c0_g1_m.16604	380	K	TRINITY_DN51048_c0_g1|g.16604 ORF TRINITY_DN51048_c0_g1|g.16604 TRINITY_DN51048_c0_g1_m.16604 type:complete len:391 (+) TRINITY_DN51048_c0_g1:429-1601(+)	1	4.05093e-10	156.14	YSAEGENEEAK(1)K	2	-1.0104	1
TRINITY_DN52351_c0_g1_m.16713	139	K	TRINITY_DN52351_c0_g1|g.16713 ORF TRINITY_DN52351_c0_g1|g.16713 TRINITY_DN52351_c0_g1_m.16713 type:complete len:199 (+) TRINITY_DN52351_c0_g1:498-1094(+)	1	0.0325201	74.424	KIEEALEK(1)K	2	-0.49677	1
TRINITY_DN52351_c0_g1_m.16713	192	K	TRINITY_DN52351_c0_g1|g.16713 ORF TRINITY_DN52351_c0_g1|g.16713 TRINITY_DN52351_c0_g1_m.16713 type:complete len:199 (+) TRINITY_DN52351_c0_g1:498-1094(+)	1	0.0516774	58.286	ATGLAPK(1)K	2	0.92932	1
TRINITY_DN52351_c0_g1_m.16713	183	K	TRINITY_DN52351_c0_g1|g.16713 ORF TRINITY_DN52351_c0_g1|g.16713 TRINITY_DN52351_c0_g1_m.16713 type:complete len:199 (+) TRINITY_DN52351_c0_g1:498-1094(+)	1	1.38882e-07	137.84	AEETAAK(1)YR	2	0.42289	1
TRINITY_DN52351_c0_g1_m.16713	122	K	TRINITY_DN52351_c0_g1|g.16713 ORF TRINITY_DN52351_c0_g1|g.16713 TRINITY_DN52351_c0_g1_m.16713 type:complete len:199 (+) TRINITY_DN52351_c0_g1:498-1094(+)	1	7.83748e-23	156.57	VSAIASWENTK(1)K	2	0.66122	1
TRINITY_DN52351_c0_g1_m.16713	176	K	TRINITY_DN52351_c0_g1|g.16713 ORF TRINITY_DN52351_c0_g1|g.16713 TRINITY_DN52351_c0_g1_m.16713 type:complete len:199 (+) TRINITY_DN52351_c0_g1:498-1094(+)	1	0.000203154	106.97	RGEEILK(1)AEETAAK	3	1.3249	3
TRINITY_DN52351_c0_g1_m.16713	107	K	TRINITY_DN52351_c0_g1|g.16713 ORF TRINITY_DN52351_c0_g1|g.16713 TRINITY_DN52351_c0_g1_m.16713 type:complete len:199 (+) TRINITY_DN52351_c0_g1:498-1094(+)	1	0.0208892	53.679	AENK(1)AIK	2	1.2963	1
TRINITY_DN52351_c0_g1_m.16713	69	K	TRINITY_DN52351_c0_g1|g.16713 ORF TRINITY_DN52351_c0_g1|g.16713 TRINITY_DN52351_c0_g1_m.16713 type:complete len:199 (+) TRINITY_DN52351_c0_g1:498-1094(+)	1	9.96524e-19	135.13	VADPPTEK(1)SPGGSINR	2	-1.2496	1
TRINITY_DN52351_c0_g1_m.16713	169	K	TRINITY_DN52351_c0_g1|g.16713 ORF TRINITY_DN52351_c0_g1|g.16713 TRINITY_DN52351_c0_g1_m.16713 type:complete len:199 (+) TRINITY_DN52351_c0_g1:498-1094(+)	1	0.00876616	58.687	AITEAK(1)R	2	0.083447	1
TRINITY_DN52351_c0_g1_m.16713	101	K	TRINITY_DN52351_c0_g1|g.16713 ORF TRINITY_DN52351_c0_g1|g.16713 TRINITY_DN52351_c0_g1_m.16713 type:complete len:199 (+) TRINITY_DN52351_c0_g1:498-1094(+)	1	0.00152153	69.716	AWEDSEK(1)VK	2	-0.46869	1
TRINITY_DN52351_c0_g1_m.16713	151	K	TRINITY_DN52351_c0_g1|g.16713 ORF TRINITY_DN52351_c0_g1|g.16713 TRINITY_DN52351_c0_g1_m.16713 type:complete len:199 (+) TRINITY_DN52351_c0_g1:498-1094(+)	1	0.0023696	92.677	NK(1)VALIHR	2	0.58364	1
TRINITY_DN52351_c0_g1_m.16713	54	K	TRINITY_DN52351_c0_g1|g.16713 ORF TRINITY_DN52351_c0_g1|g.16713 TRINITY_DN52351_c0_g1_m.16713 type:complete len:199 (+) TRINITY_DN52351_c0_g1:498-1094(+)	1	0.0111421	71.219	VDDSK(1)TLAIVEK	2	-2.7262	1
TRINITY_DN52453_c0_g1_m.16720	79	K	TRINITY_DN52453_c0_g1|g.16720 ORF TRINITY_DN52453_c0_g1|g.16720 TRINITY_DN52453_c0_g1_m.16720 type:internal len:101 (+) TRINITY_DN52453_c0_g1:2-301(+)	1	0.00318615	72.038	GEELEETK(1)K	2	0.18648	2
TRINITY_DN53129_c0_g1_m.16760	72	K	TRINITY_DN53129_c0_g1|g.16760 ORF TRINITY_DN53129_c0_g1|g.16760 TRINITY_DN53129_c0_g1_m.16760 type:5prime_partial len:136 (+) TRINITY_DN53129_c0_g1:2-409(+)	1	0.00204859	86.205	NFQK(1)VDPSK	2	0.55902	1
TRINITY_DN53129_c0_g1_m.16760	56	K	TRINITY_DN53129_c0_g1|g.16760 ORF TRINITY_DN53129_c0_g1|g.16760 TRINITY_DN53129_c0_g1_m.16760 type:5prime_partial len:136 (+) TRINITY_DN53129_c0_g1:2-409(+)	1	4.50776e-11	136.94	GSFLDK(1)SEVTDR	2	3.2366	1
TRINITY_DN53197_c0_g1_m.16763	134	K	TRINITY_DN53197_c0_g1|g.16763 ORF TRINITY_DN53197_c0_g1|g.16763 TRINITY_DN53197_c0_g1_m.16763 type:internal len:210 (-) TRINITY_DN53197_c0_g1:1-627(-)	1	2.14793e-06	111.61	GTALAIK(1)HAGR	2	-0.26199	1
TRINITY_DN53197_c0_g1_m.16763	188	K	TRINITY_DN53197_c0_g1|g.16763 ORF TRINITY_DN53197_c0_g1|g.16763 TRINITY_DN53197_c0_g1_m.16763 type:internal len:210 (-) TRINITY_DN53197_c0_g1:1-627(-)	1	0.0235334	43.272	AAAAELGGK(1)GVR	2	-1.2653	1
TRINITY_DN54985_c0_g2_m.16864	116	K	TRINITY_DN54985_c0_g2|g.16864 ORF TRINITY_DN54985_c0_g2|g.16864 TRINITY_DN54985_c0_g2_m.16864 type:internal len:153 (+) TRINITY_DN54985_c0_g2:1-456(+)	1	0.0636744	42.229	IK(1)AVNAK	2	1.2991	1
TRINITY_DN55520_c0_g1_m.16899	63	K	TRINITY_DN55520_c0_g1|g.16899 ORF TRINITY_DN55520_c0_g1|g.16899 TRINITY_DN55520_c0_g1_m.16899 type:complete len:116 (+) TRINITY_DN55520_c0_g1:103-450(+)	1	0.00244587	70.598	FTNAIFLK(1)VDVDELK	2	4.2015	2
TRINITY_DN55520_c0_g1_m.16899	70	K	TRINITY_DN55520_c0_g1|g.16899 ORF TRINITY_DN55520_c0_g1|g.16899 TRINITY_DN55520_c0_g1_m.16899 type:complete len:116 (+) TRINITY_DN55520_c0_g1:103-450(+)	1	1.05248e-17	183	VDVDELK(1)TVSEEWK	2	2.341	1
TRINITY_DN55520_c0_g1_m.16899	95	K	TRINITY_DN55520_c0_g1|g.16899 ORF TRINITY_DN55520_c0_g1|g.16899 TRINITY_DN55520_c0_g1_m.16899 type:complete len:116 (+) TRINITY_DN55520_c0_g1:103-450(+)	1	1.97581e-07	110.52	DGEVVDK(1)LVGAHK	2	-2.8753	1
TRINITY_DN55520_c0_g1_m.16899	114	K	TRINITY_DN55520_c0_g1|g.16899 ORF TRINITY_DN55520_c0_g1|g.16899 TRINITY_DN55520_c0_g1_m.16899 type:complete len:116 (+) TRINITY_DN55520_c0_g1:103-450(+)	1	0.00364356	96.311	KIELLLNK(1)Q	2	-2.8529	1
TRINITY_DN55520_c0_g1_m.16899	88	K	TRINITY_DN55520_c0_g1|g.16899 ORF TRINITY_DN55520_c0_g1|g.16899 TRINITY_DN55520_c0_g1_m.16899 type:complete len:116 (+) TRINITY_DN55520_c0_g1:103-450(+)	1	1.30942e-20	131.06	VTAMPTFIFLK(1)DGEVVDK	2	5.7138	2
TRINITY_DN55520_c0_g1_m.16899	77	K	TRINITY_DN55520_c0_g1|g.16899 ORF TRINITY_DN55520_c0_g1|g.16899 TRINITY_DN55520_c0_g1_m.16899 type:complete len:116 (+) TRINITY_DN55520_c0_g1:103-450(+)	1	3.67435e-20	141.88	TVSEEWK(1)VTAMPTFIFLK	2	0.64128	1
TRINITY_DN55520_c0_g1_m.16899	106	K	TRINITY_DN55520_c0_g1|g.16899 ORF TRINITY_DN55520_c0_g1|g.16899 TRINITY_DN55520_c0_g1_m.16899 type:complete len:116 (+) TRINITY_DN55520_c0_g1:103-450(+)	1	1.26676e-09	112.93	LVGAHKDELPK(1)K	2	-1.5959	2
TRINITY_DN55520_c0_g1_m.16899	24	K	TRINITY_DN55520_c0_g1|g.16899 ORF TRINITY_DN55520_c0_g1|g.16899 TRINITY_DN55520_c0_g1_m.16899 type:complete len:116 (+) TRINITY_DN55520_c0_g1:103-450(+)	1	1.01363e-33	145.31	AEEGAVIGCHTVDEWNHHFGQAK(1)ESGK	3	-2.4776	2
TRINITY_DN55520_c0_g1_m.16899	101	K	TRINITY_DN55520_c0_g1|g.16899 ORF TRINITY_DN55520_c0_g1|g.16899 TRINITY_DN55520_c0_g1_m.16899 type:complete len:116 (+) TRINITY_DN55520_c0_g1:103-450(+)	1	0.000115875	130.79	LVGAHK(1)DELPK	2	0.43114	3
TRINITY_DN55520_c0_g1_m.16899	54	K	TRINITY_DN55520_c0_g1|g.16899 ORF TRINITY_DN55520_c0_g1|g.16899 TRINITY_DN55520_c0_g1_m.16899 type:complete len:116 (+) TRINITY_DN55520_c0_g1:103-450(+)	1	7.87649e-05	124.81	IIAPIFAELAK(1)K	2	2.0531	1
TRINITY_DN55520_c0_g1_m.16899	55	K	TRINITY_DN55520_c0_g1|g.16899 ORF TRINITY_DN55520_c0_g1|g.16899 TRINITY_DN55520_c0_g1_m.16899 type:complete len:116 (+) TRINITY_DN55520_c0_g1:103-450(+)	1	0.0102881	78.816	K(1)FTNAIFLK	2	0.42494	1
TRINITY_DN55749_c0_g1_m.16922	166	K	TRINITY_DN55749_c0_g1|g.16922 ORF TRINITY_DN55749_c0_g1|g.16922 TRINITY_DN55749_c0_g1_m.16922 type:5prime_partial len:202 (+) TRINITY_DN55749_c0_g1:2-607(+)	1	0.00093607	65.173	VLGK(1)GMLPASQPVVVK	2	-0.92604	1
TRINITY_DN55749_c0_g1_m.16922	99	K	TRINITY_DN55749_c0_g1|g.16922 ORF TRINITY_DN55749_c0_g1|g.16922 TRINITY_DN55749_c0_g1_m.16922 type:5prime_partial len:202 (+) TRINITY_DN55749_c0_g1:2-607(+)	1	0.000952655	71.066	ILFDK(1)YHPGYFGK	2	-2.5864	1
TRINITY_DN55749_c0_g1_m.16922	178	K	TRINITY_DN55749_c0_g1|g.16922 ORF TRINITY_DN55749_c0_g1|g.16922 TRINITY_DN55749_c0_g1_m.16922 type:5prime_partial len:202 (+) TRINITY_DN55749_c0_g1:2-607(+)	1	9.04521e-08	150.21	GMLPASQPVVVK(1)AK	2	4.0072	1
TRINITY_DN55749_c0_g1_m.16922	184	K	TRINITY_DN55749_c0_g1|g.16922 ORF TRINITY_DN55749_c0_g1|g.16922 TRINITY_DN55749_c0_g1_m.16922 type:5prime_partial len:202 (+) TRINITY_DN55749_c0_g1:2-607(+)	1	0.074779	41.025	LISK(1)TAEK	2	-0.84933	1
TRINITY_DN55749_c0_g1_m.16922	107	K	TRINITY_DN55749_c0_g1|g.16922 ORF TRINITY_DN55749_c0_g1|g.16922 TRINITY_DN55749_c0_g1_m.16922 type:5prime_partial len:202 (+) TRINITY_DN55749_c0_g1:2-607(+)	1	0.0538678	46.447	YHPGYFGK(1)VGMR	2	-1.3912	1
TRINITY_DN55938_c0_g1_m.16938	246	K	TRINITY_DN55938_c0_g1|g.16938 ORF TRINITY_DN55938_c0_g1|g.16938 TRINITY_DN55938_c0_g1_m.16938 type:complete len:664 (+) TRINITY_DN55938_c0_g1:259-2250(+)	1	0.00100514	54.27	LDCVFGDDFDK(1)K	2	0.23134	1
TRINITY_DN55938_c0_g1_m.16938	138	K	TRINITY_DN55938_c0_g1|g.16938 ORF TRINITY_DN55938_c0_g1|g.16938 TRINITY_DN55938_c0_g1_m.16938 type:complete len:664 (+) TRINITY_DN55938_c0_g1:259-2250(+)	1	0.00366659	81.642	GFK(1)EVAQK	2	0.58377	1
TRINITY_DN55938_c0_g1_m.16938	143	K	TRINITY_DN55938_c0_g1|g.16938 ORF TRINITY_DN55938_c0_g1|g.16938 TRINITY_DN55938_c0_g1_m.16938 type:complete len:664 (+) TRINITY_DN55938_c0_g1:259-2250(+)	1	0.00716566	68.548	EVAQK(1)VHDLGLK	2	-1.4218	1
TRINITY_DN56510_c0_g1_m.16971	131	K	TRINITY_DN56510_c0_g1|g.16971 ORF TRINITY_DN56510_c0_g1|g.16971 TRINITY_DN56510_c0_g1_m.16971 type:complete len:195 (+) TRINITY_DN56510_c0_g1:175-759(+)	1	0.000849723	74.849	K(1)IESATSHFK	2	0.56006	1
TRINITY_DN56510_c0_g1_m.16971	57	K	TRINITY_DN56510_c0_g1|g.16971 ORF TRINITY_DN56510_c0_g1|g.16971 TRINITY_DN56510_c0_g1_m.16971 type:complete len:195 (+) TRINITY_DN56510_c0_g1:175-759(+)	1	9.20365e-15	155.34	APAAALFK(1)ALFTDWHNLGPK	3	1.1723	1
TRINITY_DN56510_c0_g1_m.16971	115	K	TRINITY_DN56510_c0_g1|g.16971 ORF TRINITY_DN56510_c0_g1|g.16971 TRINITY_DN56510_c0_g1_m.16971 type:complete len:195 (+) TRINITY_DN56510_c0_g1:175-759(+)	1	2.94252e-07	141.44	LEFIDHEK(1)FELK	2	1.5836	2
TRINITY_DN56510_c0_g1_m.16971	180	K	TRINITY_DN56510_c0_g1|g.16971 ORF TRINITY_DN56510_c0_g1|g.16971 TRINITY_DN56510_c0_g1_m.16971 type:complete len:195 (+) TRINITY_DN56510_c0_g1:175-759(+)	1	8.69344e-20	189.13	SVK(1)AVEEFLAANPGSYA	2	2.8648	2
TRINITY_DN56510_c0_g1_m.16971	172	K	TRINITY_DN56510_c0_g1|g.16971 ORF TRINITY_DN56510_c0_g1|g.16971 TRINITY_DN56510_c0_g1_m.16971 type:complete len:195 (+) TRINITY_DN56510_c0_g1:175-759(+)	1	0.0198035	76.605	AK(1)EGFIK	2	1.1466	2
TRINITY_DN56510_c0_g1_m.16971	169	K	TRINITY_DN56510_c0_g1|g.16971 ORF TRINITY_DN56510_c0_g1|g.16971 TRINITY_DN56510_c0_g1_m.16971 type:complete len:195 (+) TRINITY_DN56510_c0_g1:175-759(+)	1	0.00161661	54.27	ALPGVDSTEDIK(1)K	2	1.9561	1
TRINITY_DN56510_c0_g1_m.16971	151	K	TRINITY_DN56510_c0_g1|g.16971 ORF TRINITY_DN56510_c0_g1|g.16971 TRINITY_DN56510_c0_g1_m.16971 type:complete len:195 (+) TRINITY_DN56510_c0_g1:175-759(+)	1	1.13058e-07	117.45	GAGSIVK(1)LTGTYK	2	0.46799	1
TRINITY_DN56510_c0_g1_m.16971	144	K	TRINITY_DN56510_c0_g1|g.16971 ORF TRINITY_DN56510_c0_g1|g.16971 TRINITY_DN56510_c0_g1_m.16971 type:complete len:195 (+) TRINITY_DN56510_c0_g1:175-759(+)	1	0.0091425	87.942	VEPK(1)GAGSIVK	2	1.2188	1
TRINITY_DN56510_c0_g1_m.16971	157	K	TRINITY_DN56510_c0_g1|g.16971 ORF TRINITY_DN56510_c0_g1|g.16971 TRINITY_DN56510_c0_g1_m.16971 type:complete len:195 (+) TRINITY_DN56510_c0_g1:175-759(+)	1	5.64395e-20	177.62	LTGTYK(1)ALPGVDSTEDIK	2	-1.9934	3
TRINITY_DN56510_c0_g1_m.16971	140	K	TRINITY_DN56510_c0_g1|g.16971 ORF TRINITY_DN56510_c0_g1|g.16971 TRINITY_DN56510_c0_g1_m.16971 type:complete len:195 (+) TRINITY_DN56510_c0_g1:175-759(+)	1	2.80346e-31	216.04	IESATSHFK(1)VEPK	2	-0.42414	4
TRINITY_DN56672_c0_g1_m.16982	197	K	TRINITY_DN56672_c0_g1|g.16982 ORF TRINITY_DN56672_c0_g1|g.16982 TRINITY_DN56672_c0_g1_m.16982 type:complete len:398 (+) TRINITY_DN56672_c0_g1:178-1371(+)	1	0.00234772	79.059	VDMK(1)QIER	2	-0.71378	1
TRINITY_DN56672_c0_g1_m.16982	272	K	TRINITY_DN56672_c0_g1|g.16982 ORF TRINITY_DN56672_c0_g1|g.16982 TRINITY_DN56672_c0_g1_m.16982 type:complete len:398 (+) TRINITY_DN56672_c0_g1:178-1371(+)	1	0.00172887	71.896	RHETAYTK(1)IIEK	3	-0.74078	2
TRINITY_DN56672_c0_g1_m.16982	343	K	TRINITY_DN56672_c0_g1|g.16982 ORF TRINITY_DN56672_c0_g1|g.16982 TRINITY_DN56672_c0_g1_m.16982 type:complete len:398 (+) TRINITY_DN56672_c0_g1:178-1371(+)	1	0.00029659	56.938	WK(1)VEGLTGLSSEGNK	2	-0.51009	1
TRINITY_DN59128_c0_g1_m.17126	19	K	TRINITY_DN59128_c0_g1|g.17126 ORF TRINITY_DN59128_c0_g1|g.17126 TRINITY_DN59128_c0_g1_m.17126 type:complete len:146 (+) TRINITY_DN59128_c0_g1:22-459(+)	0.999997	0.000155593	97.594	KPVAEEK(1)APAEK	2	-1.492	1
TRINITY_DN60704_c0_g1_m.17243	78	K	TRINITY_DN60704_c0_g1|g.17243 ORF TRINITY_DN60704_c0_g1|g.17243 TRINITY_DN60704_c0_g1_m.17243 type:internal len:107 (+) TRINITY_DN60704_c0_g1:3-320(+)	1	2.49619e-10	145.95	PK(1)LALWIEELNK	2	-0.49325	1
TRINITY_DN60984_c0_g1_m.17279	101	K	TRINITY_DN60984_c0_g1|g.17279 ORF TRINITY_DN60984_c0_g1|g.17279 TRINITY_DN60984_c0_g1_m.17279 type:complete len:126 (+) TRINITY_DN60984_c0_g1:31-408(+)	1	0.000181234	89.382	K(1)YQATVWDKPWEK	2	-1.8978	1
TRINITY_DN60984_c0_g1_m.17279	78	K	TRINITY_DN60984_c0_g1|g.17279 ORF TRINITY_DN60984_c0_g1|g.17279 TRINITY_DN60984_c0_g1_m.17279 type:complete len:126 (+) TRINITY_DN60984_c0_g1:31-408(+)	1	0.000223807	119.43	VLSGETQVISGVK(1)YR	2	-0.38355	1
TRINITY_DN60984_c0_g1_m.17279	55	K	TRINITY_DN60984_c0_g1|g.17279 ORF TRINITY_DN60984_c0_g1|g.17279 TRINITY_DN60984_c0_g1_m.17279 type:complete len:126 (+) TRINITY_DN60984_c0_g1:31-408(+)	1	0.00220769	93.561	FAVAENNK(1)K	2	0.018403	1
TRINITY_DN61373_c0_g1_m.17300	25	K	TRINITY_DN61373_c0_g1|g.17300 ORF TRINITY_DN61373_c0_g1|g.17300 TRINITY_DN61373_c0_g1_m.17300 type:complete len:539 (+) TRINITY_DN61373_c0_g1:163-1779(+)	1	0.0075865	83.623	TESYVDNK(1)R	2	1.2621	1
TRINITY_DN61373_c0_g1_m.17300	318	K	TRINITY_DN61373_c0_g1|g.17300 ORF TRINITY_DN61373_c0_g1|g.17300 TRINITY_DN61373_c0_g1_m.17300 type:complete len:539 (+) TRINITY_DN61373_c0_g1:163-1779(+)	1	2.06042e-25	159.44	DAVTDLSLHYLAK(1)AK	2	-0.099005	1
TRINITY_DN61373_c0_g1_m.17300	86	K	TRINITY_DN61373_c0_g1|g.17300 ORF TRINITY_DN61373_c0_g1|g.17300 TRINITY_DN61373_c0_g1_m.17300 type:complete len:539 (+) TRINITY_DN61373_c0_g1:163-1779(+)	1	1.69551e-08	66.509	MEVLQPAAK(1)MLVDLSR	2	2.0623	1
TRINITY_DN61373_c0_g1_m.17300	17	K	TRINITY_DN61373_c0_g1|g.17300 ORF TRINITY_DN61373_c0_g1|g.17300 TRINITY_DN61373_c0_g1_m.17300 type:complete len:539 (+) TRINITY_DN61373_c0_g1:163-1779(+)	1	1.66034e-09	150.21	SSK(1)TESYVDNK	2	0.38388	1
TRINITY_DN61759_c0_g1_m.17341	102	K	TRINITY_DN61759_c0_g1|g.17341 ORF TRINITY_DN61759_c0_g1|g.17341 TRINITY_DN61759_c0_g1_m.17341 type:internal len:120 (-) TRINITY_DN61759_c0_g1:3-359(-)	1	2.7835e-09	90.376	VPATVFGAGIK(1)EELLEK	2	2.9428	1
TRINITY_DN62083_c0_g1_m.17372	28	K	TRINITY_DN62083_c0_g1|g.17372 ORF TRINITY_DN62083_c0_g1|g.17372 TRINITY_DN62083_c0_g1_m.17372 type:complete len:166 (+) TRINITY_DN62083_c0_g1:91-588(+)	1	3.96935e-09	119.58	FDADGDGK(1)ISASELGNVVR	2	-1.4269	1
TRINITY_DN62083_c0_g1_m.17372	3	K	TRINITY_DN62083_c0_g1|g.17372 ORF TRINITY_DN62083_c0_g1|g.17372 TRINITY_DN62083_c0_g1_m.17372 type:complete len:166 (+) TRINITY_DN62083_c0_g1:91-588(+)	1	0.00801707	49.325	MEK(1)APAGIR	2	-1.5031	1
TRINITY_DN62114_c0_g2_m.17375	65	K	TRINITY_DN62114_c0_g2|g.17375 ORF TRINITY_DN62114_c0_g2|g.17375 TRINITY_DN62114_c0_g2_m.17375 type:3prime_partial len:107 (+) TRINITY_DN62114_c0_g2:2-319(+)	1	0.0461792	68.49	TASNSDEK(1)QLR	2	0.64316	1
TRINITY_DN62517_c0_g1_m.17413	75	K	TRINITY_DN62517_c0_g1|g.17413 ORF TRINITY_DN62517_c0_g1|g.17413 TRINITY_DN62517_c0_g1_m.17413 type:5prime_partial len:133 (+) TRINITY_DN62517_c0_g1:3-401(+)	1	0.0729468	62.969	LRPAEYK(1)R	2	1.1795	1
TRINITY_DN63502_c0_g1_m.17512	174	K	TRINITY_DN63502_c0_g1|g.17512 ORF TRINITY_DN63502_c0_g1|g.17512 TRINITY_DN63502_c0_g1_m.17512 type:5prime_partial len:181 (-) TRINITY_DN63502_c0_g1:18-560(-)	0.870885	0.0013704	78.888	QVQCISFIAYK(0.129)PK(0.871)GTEYIN	2	-2	1
TRINITY_DN63502_c0_g1_m.17512	64	K	TRINITY_DN63502_c0_g1|g.17512 ORF TRINITY_DN63502_c0_g1|g.17512 TRINITY_DN63502_c0_g1_m.17512 type:5prime_partial len:181 (-) TRINITY_DN63502_c0_g1:18-560(-)	1	0.00852555	67.464	VWPVEGVK(1)K	2	-1.6392	2
TRINITY_DN63502_c0_g1_m.17512	138	K	TRINITY_DN63502_c0_g1|g.17512 ORF TRINITY_DN63502_c0_g1|g.17512 TRINITY_DN63502_c0_g1_m.17512 type:5prime_partial len:181 (-) TRINITY_DN63502_c0_g1:18-560(-)	1	8.9946e-30	171.03	LPMFGCTDAVQVAK(1)EVEECRK	3	-1.9895	3
TRINITY_DN63502_c0_g1_m.17512	100	K	TRINITY_DN63502_c0_g1|g.17512 ORF TRINITY_DN63502_c0_g1|g.17512 TRINITY_DN63502_c0_g1_m.17512 type:5prime_partial len:181 (-) TRINITY_DN63502_c0_g1:18-560(-)	1	0.00204668	53.051	SGWIPCLEFDK(1)IGFVYR	2	5.0478	1
TRINITY_DN63502_c0_g1_m.17512	65	K	TRINITY_DN63502_c0_g1|g.17512 ORF TRINITY_DN63502_c0_g1|g.17512 TRINITY_DN63502_c0_g1_m.17512 type:5prime_partial len:181 (-) TRINITY_DN63502_c0_g1:18-560(-)	1	5.35682e-14	166.48	K(1)FETLSYLPTLSPEALLK	2	2.7401	1
TRINITY_DN63502_c0_g1_m.17512	150	K	TRINITY_DN63502_c0_g1|g.17512 ORF TRINITY_DN63502_c0_g1|g.17512 TRINITY_DN63502_c0_g1_m.17512 type:5prime_partial len:181 (-) TRINITY_DN63502_c0_g1:18-560(-)	1	3.6143e-15	196.77	EHPEK(1)FIR	2	-0.39295	3
TRINITY_DN63600_c0_g1_m.17517	439	K	TRINITY_DN63600_c0_g1|g.17517 ORF TRINITY_DN63600_c0_g1|g.17517 TRINITY_DN63600_c0_g1_m.17517 type:complete len:489 (+) TRINITY_DN63600_c0_g1:112-1578(+)	1	0.013682	45.939	K(1)FVSQGAYDTR	2	-0.82307	1
TRINITY_DN63600_c0_g1_m.17517	467	K	TRINITY_DN63600_c0_g1|g.17517 ORF TRINITY_DN63600_c0_g1|g.17517 TRINITY_DN63600_c0_g1_m.17517 type:complete len:489 (+) TRINITY_DN63600_c0_g1:112-1578(+)	1	0.0273157	60.589	IFPK(1)ELLHR	2	-2.0987	1
TRINITY_DN63600_c0_g1_m.17517	476	K	TRINITY_DN63600_c0_g1|g.17517 ORF TRINITY_DN63600_c0_g1|g.17517 TRINITY_DN63600_c0_g1_m.17517 type:complete len:489 (+) TRINITY_DN63600_c0_g1:112-1578(+)	1	8.06348e-11	133.49	IPSK(1)TLDQYYSR	2	-1.8598	1
TRINITY_DN63600_c0_g1_m.17517	36	K	TRINITY_DN63600_c0_g1|g.17517 ORF TRINITY_DN63600_c0_g1|g.17517 TRINITY_DN63600_c0_g1_m.17517 type:complete len:489 (+) TRINITY_DN63600_c0_g1:112-1578(+)	1	0.0197462	50.314	TVSGVAGPLVILDK(1)VK	2	1.2381	1
TRINITY_DN63600_c0_g1_m.17517	381	K	TRINITY_DN63600_c0_g1|g.17517 ORF TRINITY_DN63600_c0_g1|g.17517 TRINITY_DN63600_c0_g1_m.17517 type:complete len:489 (+) TRINITY_DN63600_c0_g1:112-1578(+)	1	7.85517e-07	143.22	LMK(1)SAIGEGMTR	2	0.1452	3
TRINITY_DN63600_c0_g1_m.17517	41	K	TRINITY_DN63600_c0_g1|g.17517 ORF TRINITY_DN63600_c0_g1|g.17517 TRINITY_DN63600_c0_g1_m.17517 type:complete len:489 (+) TRINITY_DN63600_c0_g1:112-1578(+)	1	3.90879e-10	159.11	GPK(1)YQEIVNIR	2	2.6244	1
TRINITY_DN63741_c0_g1_m.17529	21	K	TRINITY_DN63741_c0_g1|g.17529 ORF TRINITY_DN63741_c0_g1|g.17529 TRINITY_DN63741_c0_g1_m.17529 type:complete len:491 (+) TRINITY_DN63741_c0_g1:591-2063(+)	1	0.040098	42.075	ASVGFK(1)AGVK	2	0.40174	1
TRINITY_DN63741_c0_g1_m.17529	208	K	TRINITY_DN63741_c0_g1|g.17529 ORF TRINITY_DN63741_c0_g1|g.17529 TRINITY_DN63741_c0_g1_m.17529 type:complete len:491 (+) TRINITY_DN63741_c0_g1:591-2063(+)	1	9.74702e-111	358.74	GGLDFTK(1)DDENVNSQPFMR	2	-1.7959	2
TRINITY_DN63741_c0_g1_m.17529	341	K	TRINITY_DN63741_c0_g1|g.17529 ORF TRINITY_DN63741_c0_g1|g.17529 TRINITY_DN63741_c0_g1_m.17529 type:complete len:491 (+) TRINITY_DN63741_c0_g1:591-2063(+)	1	2.20869e-31	272.05	MSGGDHIHAGTVVGK(1)LEGER	3	0.80755	9
TRINITY_DN63741_c0_g1_m.17529	457	K	TRINITY_DN63741_c0_g1|g.17529 ORF TRINITY_DN63741_c0_g1|g.17529 TRINITY_DN63741_c0_g1_m.17529 type:complete len:491 (+) TRINITY_DN63741_c0_g1:591-2063(+)	1	0.000550677	59.997	EAAK(1)WSPELAAACEVWK	2	2.6643	1
TRINITY_DN63741_c0_g1_m.17529	363	K	TRINITY_DN63741_c0_g1|g.17529 ORF TRINITY_DN63741_c0_g1|g.17529 TRINITY_DN63741_c0_g1_m.17529 type:complete len:491 (+) TRINITY_DN63741_c0_g1:591-2063(+)	1	0.000518053	113.7	DDFIEK(1)DR	2	2.751	2
TRINITY_DN63741_c0_g1_m.17529	481	K	TRINITY_DN63741_c0_g1|g.17529 ORF TRINITY_DN63741_c0_g1|g.17529 TRINITY_DN63741_c0_g1_m.17529 type:complete len:491 (+) TRINITY_DN63741_c0_g1:591-2063(+)	1	9.89796e-24	175.54	EITFEFEPVDK(1)VDK	2	5.1752	3
TRINITY_DN63741_c0_g1_m.17529	487	K	TRINITY_DN63741_c0_g1|g.17529 ORF TRINITY_DN63741_c0_g1|g.17529 TRINITY_DN63741_c0_g1_m.17529 type:complete len:491 (+) TRINITY_DN63741_c0_g1:591-2063(+)	1	4.44719e-05	150.53	VDKVDK(1)ETK	2	0.07992	2
TRINITY_DN63741_c0_g1_m.17529	25	K	TRINITY_DN63741_c0_g1|g.17529 ORF TRINITY_DN63741_c0_g1|g.17529 TRINITY_DN63741_c0_g1_m.17529 type:complete len:491 (+) TRINITY_DN63741_c0_g1:591-2063(+)	1	0.0352247	67.903	AGVK(1)DYK	2	1.8554	1
TRINITY_DN63741_c0_g1_m.17529	190	K	TRINITY_DN63741_c0_g1|g.17529 ORF TRINITY_DN63741_c0_g1|g.17529 TRINITY_DN63741_c0_g1_m.17529 type:complete len:491 (+) TRINITY_DN63741_c0_g1:591-2063(+)	1	1.23937e-06	170.95	LGLSAK(1)NYGR	2	-0.23969	1
TRINITY_DN63741_c0_g1_m.17529	182	K	TRINITY_DN63741_c0_g1|g.17529 ORF TRINITY_DN63741_c0_g1|g.17529 TRINITY_DN63741_c0_g1_m.17529 type:complete len:491 (+) TRINITY_DN63741_c0_g1:591-2063(+)	1	6.53445e-09	130.31	YGRPLLGCTIK(1)PK	3	-2.2266	2
TRINITY_DN63741_c0_g1_m.17529	28	K	TRINITY_DN63741_c0_g1|g.17529 ORF TRINITY_DN63741_c0_g1|g.17529 TRINITY_DN63741_c0_g1_m.17529 type:complete len:491 (+) TRINITY_DN63741_c0_g1:591-2063(+)	1	3.95694e-24	156.73	DYK(1)LTYYTPDYETK	2	-1.0059	1
TRINITY_DN63741_c0_g1_m.17529	39	K	TRINITY_DN63741_c0_g1|g.17529 ORF TRINITY_DN63741_c0_g1|g.17529 TRINITY_DN63741_c0_g1_m.17529 type:complete len:491 (+) TRINITY_DN63741_c0_g1:591-2063(+)	1	1.05655e-14	101.43	LTYYTPDYETK(1)DTDILAAFR	3	-0.34122	1
TRINITY_DN63741_c0_g1_m.17529	259	K	TRINITY_DN63741_c0_g1|g.17529 ORF TRINITY_DN63741_c0_g1|g.17529 TRINITY_DN63741_c0_g1_m.17529 type:complete len:491 (+) TRINITY_DN63741_c0_g1:591-2063(+)	1	3.56899e-60	285.55	GHYLNATAGTCEEMIK(1)R	2	-3.9395	4
TRINITY_DN63741_c0_g1_m.17529	484	K	TRINITY_DN63741_c0_g1|g.17529 ORF TRINITY_DN63741_c0_g1|g.17529 TRINITY_DN63741_c0_g1_m.17529 type:complete len:491 (+) TRINITY_DN63741_c0_g1:591-2063(+)	0.997131	0.00065632	102.57	EITFEFEPVDK(0.003)VDK(0.997)VDK	2	0.015874	2
TRINITY_DN63741_c0_g1_m.17529	323	K	TRINITY_DN63741_c0_g1|g.17529 ORF TRINITY_DN63741_c0_g1|g.17529 TRINITY_DN63741_c0_g1_m.17529 type:complete len:491 (+) TRINITY_DN63741_c0_g1:591-2063(+)	1	0.00522891	79.833	VLAK(1)ALR	2	-0.74795	1
TRINITY_DN63741_c0_g1_m.17529	153	K	TRINITY_DN63741_c0_g1|g.17529 ORF TRINITY_DN63741_c0_g1|g.17529 TRINITY_DN63741_c0_g1_m.17529 type:complete len:491 (+) TRINITY_DN63741_c0_g1:591-2063(+)	1	0.00157274	54.261	IPTSYSK(1)TFQGPPHGIQVER	3	-1.26	1
TRINITY_DN63741_c0_g1_m.17529	184	K	TRINITY_DN63741_c0_g1|g.17529 ORF TRINITY_DN63741_c0_g1|g.17529 TRINITY_DN63741_c0_g1_m.17529 type:complete len:491 (+) TRINITY_DN63741_c0_g1:591-2063(+)	1	1.01248e-19	165.02	PK(1)LGLSAK	2	-0.26551	4
TRINITY_DN63741_c0_g1_m.17529	243	K	TRINITY_DN63741_c0_g1|g.17529 ORF TRINITY_DN63741_c0_g1|g.17529 TRINITY_DN63741_c0_g1_m.17529 type:complete len:491 (+) TRINITY_DN63741_c0_g1:591-2063(+)	1	1.52906e-23	213.32	AQAETGEIK(1)GHYLNATAGTCEEMIK	3	-1.928	4
TRINITY_DN63741_c0_g1_m.17529	312	K	TRINITY_DN63741_c0_g1|g.17529 ORF TRINITY_DN63741_c0_g1|g.17529 TRINITY_DN63741_c0_g1_m.17529 type:complete len:491 (+) TRINITY_DN63741_c0_g1:591-2063(+)	1	9.0754e-08	152.31	QK(1)NHGMHFR	2	-0.62987	4
TRINITY_DN63741_c0_g1_m.17529	171	K	TRINITY_DN63741_c0_g1|g.17529 ORF TRINITY_DN63741_c0_g1|g.17529 TRINITY_DN63741_c0_g1_m.17529 type:complete len:491 (+) TRINITY_DN63741_c0_g1:591-2063(+)	1	0.00287055	109.36	DKLNK(1)YGR	2	0.01347	1
TRINITY_DN64052_c1_g1_m.17549	142	K	TRINITY_DN64052_c1_g1|g.17549 ORF TRINITY_DN64052_c1_g1|g.17549 TRINITY_DN64052_c1_g1_m.17549 type:complete len:162 (+) TRINITY_DN64052_c1_g1:175-660(+)	1	0.000155564	96.313	FNVLK(1)VVPAGSSGGSK	2	-1.2496	1
TRINITY_DN64052_c1_g1_m.17549	96	K	TRINITY_DN64052_c1_g1|g.17549 ORF TRINITY_DN64052_c1_g1|g.17549 TRINITY_DN64052_c1_g1_m.17549 type:complete len:162 (+) TRINITY_DN64052_c1_g1:175-660(+)	1	0.0150948	67.903	NYLHYVK(1)K	2	0.69044	1
TRINITY_DN64209_c0_g1_m.17563	191	K	TRINITY_DN64209_c0_g1|g.17563 ORF TRINITY_DN64209_c0_g1|g.17563 TRINITY_DN64209_c0_g1_m.17563 type:5prime_partial len:295 (+) TRINITY_DN64209_c0_g1:2-886(+)	1	2.95729e-06	95.345	VK(1)LQSILLPLTEFNHEEK	3	1.0197	1
TRINITY_DN64209_c0_g1_m.17563	227	K	TRINITY_DN64209_c0_g1|g.17563 ORF TRINITY_DN64209_c0_g1|g.17563 TRINITY_DN64209_c0_g1_m.17563 type:5prime_partial len:295 (+) TRINITY_DN64209_c0_g1:2-886(+)	1	2.57715e-19	163.09	LVNEK(1)LLNTHSVAAR	2	-1.7586	2
TRINITY_DN64209_c0_g2_m.17565	84	K	TRINITY_DN64209_c0_g2|g.17565 ORF TRINITY_DN64209_c0_g2|g.17565 TRINITY_DN64209_c0_g2_m.17565 type:complete len:264 (+) TRINITY_DN64209_c0_g2:69-860(+)	1	9.14141e-09	137.58	QELALVTSSPGK(1)SLAR	2	-0.090817	1
TRINITY_DN64209_c0_g2_m.17565	160	K	TRINITY_DN64209_c0_g2|g.17565 ORF TRINITY_DN64209_c0_g2|g.17565 TRINITY_DN64209_c0_g2_m.17565 type:complete len:264 (+) TRINITY_DN64209_c0_g2:69-860(+)	1	6.90543e-07	104	VK(1)LQSILMPLTEFHHEEK	3	1.6032	3
TRINITY_DN64209_c0_g2_m.17565	196	K	TRINITY_DN64209_c0_g2|g.17565 ORF TRINITY_DN64209_c0_g2|g.17565 TRINITY_DN64209_c0_g2_m.17565 type:complete len:264 (+) TRINITY_DN64209_c0_g2:69-860(+)	1	9.27039e-19	202.24	LVNEK(1)LLNLHSVAAR	2	0.8775	2
TRINITY_DN64209_c0_g2_m.17565	150	K	TRINITY_DN64209_c0_g2|g.17565 ORF TRINITY_DN64209_c0_g2|g.17565 TRINITY_DN64209_c0_g2_m.17565 type:complete len:264 (+) TRINITY_DN64209_c0_g2:69-860(+)	1	0.00410733	105.22	LMK(1)YQNK	2	2.0419	1
TRINITY_DN64209_c0_g2_m.17565	135	K	TRINITY_DN64209_c0_g2|g.17565 ORF TRINITY_DN64209_c0_g2|g.17565 TRINITY_DN64209_c0_g2_m.17565 type:complete len:264 (+) TRINITY_DN64209_c0_g2:69-860(+)	1	0.000159708	111.61	FFK(1)ESSEEER	2	-0.46112	1
TRINITY_DN64261_c0_g2_m.17573	66	K	TRINITY_DN64261_c0_g2|g.17573 ORF TRINITY_DN64261_c0_g2|g.17573 TRINITY_DN64261_c0_g2_m.17573 type:complete len:142 (+) TRINITY_DN64261_c0_g2:224-649(+)	1	0.000670883	93.467	TETLEK(1)VCK	2	-1.7892	1
TRINITY_DN64266_c0_g1_m.17574	38	K	TRINITY_DN64266_c0_g1|g.17574 ORF TRINITY_DN64266_c0_g1|g.17574 TRINITY_DN64266_c0_g1_m.17574 type:complete len:324 (+) TRINITY_DN64266_c0_g1:150-1121(+)	1	7.36313e-10	126.48	DK(1)SILVWDLTK	2	-0.21394	1
TRINITY_DN64266_c0_g1_m.17574	280	K	TRINITY_DN64266_c0_g1|g.17574 ORF TRINITY_DN64266_c0_g1|g.17574 TRINITY_DN64266_c0_g1_m.17574 type:complete len:324 (+) TRINITY_DN64266_c0_g1:150-1121(+)	1	8.06915e-05	112.95	TIVQDLK(1)PEAAAAGK	2	-0.88209	1
TRINITY_DN64266_c0_g1_m.17574	138	K	TRINITY_DN64266_c0_g1|g.17574 ORF TRINITY_DN64266_c0_g1|g.17574 TRINITY_DN64266_c0_g1_m.17574 type:complete len:324 (+) TRINITY_DN64266_c0_g1:150-1121(+)	1	4.99029e-07	115.04	TIK(1)LWNTLGECK	2	-2.5502	1
TRINITY_DN64266_c0_g1_m.17574	184	K	TRINITY_DN64266_c0_g1|g.17574 ORF TRINITY_DN64266_c0_g1|g.17574 TRINITY_DN64266_c0_g1_m.17574 type:complete len:324 (+) TRINITY_DN64266_c0_g1:150-1121(+)	1	0.00102665	69.276	TVK(1)VWNLTNCK	2	0.81726	1
TRINITY_DN64704_c0_g1_m.17597	173	K	TRINITY_DN64704_c0_g1|g.17597 ORF TRINITY_DN64704_c0_g1|g.17597 TRINITY_DN64704_c0_g1_m.17597 type:5prime_partial len:245 (+) TRINITY_DN64704_c0_g1:3-737(+)	1	0.00288513	81.32	QHYK(1)IFGR	2	-0.75872	1
TRINITY_DN64704_c0_g1_m.17597	75	K	TRINITY_DN64704_c0_g1|g.17597 ORF TRINITY_DN64704_c0_g1|g.17597 TRINITY_DN64704_c0_g1_m.17597 type:5prime_partial len:245 (+) TRINITY_DN64704_c0_g1:3-737(+)	1	0.000360491	96.957	EQQAK(1)GFDDPK	2	-1.9838	1
TRINITY_DN65644_c0_g3_m.17660	98	K	TRINITY_DN65644_c0_g3|g.17660 ORF TRINITY_DN65644_c0_g3|g.17660 TRINITY_DN65644_c0_g3_m.17660 type:complete len:111 (+) TRINITY_DN65644_c0_g3:101-433(+)	1	0.0118184	69.276	EHK(1)GDAVAAIR	2	1.9087	1
TRINITY_DN67522_c0_g1_m.17811	35	K	TRINITY_DN67522_c0_g1|g.17811 ORF TRINITY_DN67522_c0_g1|g.17811 TRINITY_DN67522_c0_g1_m.17811 type:complete len:190 (+) TRINITY_DN67522_c0_g1:117-686(+)	1	0.0097522	77.358	EGLNK(1)SDISK	2	0.5373	1
TRINITY_DN67522_c0_g1_m.17811	66	K	TRINITY_DN67522_c0_g1|g.17811 ORF TRINITY_DN67522_c0_g1|g.17811 TRINITY_DN67522_c0_g1_m.17811 type:complete len:190 (+) TRINITY_DN67522_c0_g1:117-686(+)	1	0.0126984	69.276	MK(1)ESGELLFVK	2	-4.0298	1
TRINITY_DN67778_c0_g1_m.17831	59	K	TRINITY_DN67778_c0_g1|g.17831 ORF TRINITY_DN67778_c0_g1|g.17831 TRINITY_DN67778_c0_g1_m.17831 type:internal len:221 (+) TRINITY_DN67778_c0_g1:2-661(+)	1	1.15697e-29	241.99	ALSGQK(1)DEDFFSANAAAQASR	3	3.1251	2
TRINITY_DN67778_c0_g1_m.17831	155	K	TRINITY_DN67778_c0_g1|g.17831 ORF TRINITY_DN67778_c0_g1|g.17831 TRINITY_DN67778_c0_g1_m.17831 type:internal len:221 (+) TRINITY_DN67778_c0_g1:2-661(+)	1	1.43875e-08	91.939	ISEEEYVNAIK(1)DEINK	2	-0.78999	1
TRINITY_DN67778_c0_g1_m.17831	53	K	TRINITY_DN67778_c0_g1|g.17831 ORF TRINITY_DN67778_c0_g1|g.17831 TRINITY_DN67778_c0_g1_m.17831 type:internal len:221 (+) TRINITY_DN67778_c0_g1:2-661(+)	1	2.1102e-18	184.43	VVEVNALAK(1)ALSGQK	2	0.77649	1
TRINITY_DN67778_c0_g1_m.17831	93	K	TRINITY_DN67778_c0_g1|g.17831 ORF TRINITY_DN67778_c0_g1|g.17831 TRINITY_DN67778_c0_g1_m.17831 type:internal len:221 (+) TRINITY_DN67778_c0_g1:2-661(+)	1	7.42297e-10	159.11	AAAALK(1)GSEHR	2	-0.71115	1
TRINITY_DN67778_c0_g1_m.17831	144	K	TRINITY_DN67778_c0_g1|g.17831 ORF TRINITY_DN67778_c0_g1|g.17831 TRINITY_DN67778_c0_g1_m.17831 type:internal len:221 (+) TRINITY_DN67778_c0_g1:2-661(+)	1	1.90432e-09	110.9	ANK(1)ISEEEYVNAIKDEINK	3	2.76	1
TRINITY_DN68431_c0_g1_m.17871	77	K	TRINITY_DN68431_c0_g1|g.17871 ORF TRINITY_DN68431_c0_g1|g.17871 TRINITY_DN68431_c0_g1_m.17871 type:complete len:251 (+) TRINITY_DN68431_c0_g1:109-861(+)	1	2.70906e-29	228.13	IVSSIEQK(1)EENRR	2	-4.1829	2
TRINITY_DN68431_c0_g1_m.17871	144	K	TRINITY_DN68431_c0_g1|g.17871 ORF TRINITY_DN68431_c0_g1|g.17871 TRINITY_DN68431_c0_g1_m.17871 type:complete len:251 (+) TRINITY_DN68431_c0_g1:109-861(+)	1	0.00102665	85.821	YLAEFK(1)AGDER	2	2.3807	1
TRINITY_DN68431_c0_g1_m.17871	91	K	TRINITY_DN68431_c0_g1|g.17871 ORF TRINITY_DN68431_c0_g1|g.17871 TRINITY_DN68431_c0_g1_m.17871 type:complete len:251 (+) TRINITY_DN68431_c0_g1:109-861(+)	1	0.000543394	76.255	RNDDHAALVK(1)DYR	3	1.3707	3
TRINITY_DN68431_c0_g1_m.17871	17	K	TRINITY_DN68431_c0_g1|g.17871 ORF TRINITY_DN68431_c0_g1|g.17871 TRINITY_DN68431_c0_g1_m.17871 type:complete len:251 (+) TRINITY_DN68431_c0_g1:109-861(+)	1	2.37505e-18	181.9	EQYVYLAK(1)LAEQAER	2	0.10945	2
TRINITY_DN68564_c0_g1_m.17886	150	K	TRINITY_DN68564_c0_g1|g.17886 ORF TRINITY_DN68564_c0_g1|g.17886 TRINITY_DN68564_c0_g1_m.17886 type:complete len:152 (+) TRINITY_DN68564_c0_g1:98-553(+)	1	0.00340436	69.716	FCEEEDAK(1)H	2	1.0144	1
TRINITY_DN69158_c0_g1_m.17980	86	K	TRINITY_DN69158_c0_g1|g.17980 ORF TRINITY_DN69158_c0_g1|g.17980 TRINITY_DN69158_c0_g1_m.17980 type:3prime_partial len:135 (+) TRINITY_DN69158_c0_g1:289-690(+)	1	0.0178862	79.059	VK(1)EDFSK	2	-0.18261	1
TRINITY_DN69419_c0_g2_m.18029	60	K	TRINITY_DN69419_c0_g2|g.18029 ORF TRINITY_DN69419_c0_g2|g.18029 TRINITY_DN69419_c0_g2_m.18029 type:complete len:307 (+) TRINITY_DN69419_c0_g2:303-1223(+)	1	0.00218016	51.454	YK(1)GMLGTVATIAR	2	-4.4372	1
TRINITY_DN69851_c0_g3_m.18089	123	K	TRINITY_DN69851_c0_g3|g.18089 ORF TRINITY_DN69851_c0_g3|g.18089 TRINITY_DN69851_c0_g3_m.18089 type:complete len:258 (+) TRINITY_DN69851_c0_g3:141-914(+)	1	9.39281e-06	112.73	LVSAVVTPDSK(1)VFYYK	2	2.035	1
TRINITY_DN69851_c0_g3_m.18089	74	K	TRINITY_DN69851_c0_g3|g.18089 ORF TRINITY_DN69851_c0_g3|g.18089 TRINITY_DN69851_c0_g3_m.18089 type:complete len:258 (+) TRINITY_DN69851_c0_g3:141-914(+)	1	2.51278e-29	187.85	IVSSIEQK(1)EEGR	2	-2.3426	1
TRINITY_DN69851_c0_g3_m.18089	141	K	TRINITY_DN69851_c0_g3|g.18089 ORF TRINITY_DN69851_c0_g3|g.18089 TRINITY_DN69851_c0_g3_m.18089 type:complete len:258 (+) TRINITY_DN69851_c0_g3:141-914(+)	1	2.52377e-05	101.82	YLAEFK(1)TGDER	2	2.1003	1
TRINITY_DN69851_c0_g3_m.18089	55	K	TRINITY_DN69851_c0_g3|g.18089 ORF TRINITY_DN69851_c0_g3|g.18089 TRINITY_DN69851_c0_g3_m.18089 type:complete len:258 (+) TRINITY_DN69851_c0_g3:141-914(+)	1	8.07292e-06	138	NLLSVAYK(1)NVVGAR	2	3.9339	1
TRINITY_DN69851_c0_g3_m.18089	14	K	TRINITY_DN69851_c0_g3|g.18089 ORF TRINITY_DN69851_c0_g3|g.18089 TRINITY_DN69851_c0_g3_m.18089 type:complete len:258 (+) TRINITY_DN69851_c0_g3:141-914(+)	1	4.21509e-34	205.26	EENVYMAK(1)LAEQAER	2	-0.036338	1
TRINITY_DN69965_c0_g1_m.18103	83	K	TRINITY_DN69965_c0_g1|g.18103 ORF TRINITY_DN69965_c0_g1|g.18103 TRINITY_DN69965_c0_g1_m.18103 type:complete len:168 (+) TRINITY_DN69965_c0_g1:219-722(+)	1	0.014915	64.064	EELEAELEGK(1)K	2	-1.3742	1
TRINITY_DN69965_c0_g1_m.18103	110	K	TRINITY_DN69965_c0_g1|g.18103 ORF TRINITY_DN69965_c0_g1|g.18103 TRINITY_DN69965_c0_g1_m.18103 type:complete len:168 (+) TRINITY_DN69965_c0_g1:219-722(+)	1	0.00108285	65.408	EAPAVIQSYYDK(1)R	2	-2.2985	1
TRINITY_DN70132_c0_g1_m.18121	103	K	TRINITY_DN70132_c0_g1|g.18121 ORF TRINITY_DN70132_c0_g1|g.18121 TRINITY_DN70132_c0_g1_m.18121 type:complete len:110 (+) TRINITY_DN70132_c0_g1:146-475(+)	1	0.000828098	72.365	FIVFDYK(1)PTIVK	2	1.9481	1
TRINITY_DN70132_c0_g1_m.18121	24	K	TRINITY_DN70132_c0_g1|g.18121 ORF TRINITY_DN70132_c0_g1|g.18121 TRINITY_DN70132_c0_g1_m.18121 type:complete len:110 (+) TRINITY_DN70132_c0_g1:146-475(+)	1	0.000179653	94.507	FKDDVSPEK(1)IEELIR	3	-0.90796	2
TRINITY_DN70132_c0_g1_m.18121	17	K	TRINITY_DN70132_c0_g1|g.18121 ORF TRINITY_DN70132_c0_g1|g.18121 TRINITY_DN70132_c0_g1_m.18121 type:complete len:110 (+) TRINITY_DN70132_c0_g1:146-475(+)	1	0.0025415	74.424	FK(1)DDVSPEK	2	0.16891	2
TRINITY_DN71754_c0_g1_m.18297	116	K	TRINITY_DN71754_c0_g1|g.18297 ORF TRINITY_DN71754_c0_g1|g.18297 TRINITY_DN71754_c0_g1_m.18297 type:5prime_partial len:609 (+) TRINITY_DN71754_c0_g1:3-1829(+)	1	0.000327931	65.404	AK(1)QLAAQLIPR	2	-0.97227	1
TRINITY_DN71863_c0_g1_m.18308	119	K	TRINITY_DN71863_c0_g1|g.18308 ORF TRINITY_DN71863_c0_g1|g.18308 TRINITY_DN71863_c0_g1_m.18308 type:complete len:128 (+) TRINITY_DN71863_c0_g1:157-540(+)	1	6.6387e-07	154.94	SQIQQLK(1)DAIEK	2	3.2244	1
TRINITY_DN71863_c0_g1_m.18308	43	K	TRINITY_DN71863_c0_g1|g.18308 ORF TRINITY_DN71863_c0_g1|g.18308 TRINITY_DN71863_c0_g1_m.18308 type:complete len:128 (+) TRINITY_DN71863_c0_g1:157-540(+)	1	0.000210758	116.13	GANEATK(1)TLNR	2	-0.50294	1
TRINITY_DN71987_c0_g1_m.18327	167	K	TRINITY_DN71987_c0_g1|g.18327 ORF TRINITY_DN71987_c0_g1|g.18327 TRINITY_DN71987_c0_g1_m.18327 type:complete len:341 (+) TRINITY_DN71987_c0_g1:156-1178(+)	1	0.0455654	61.194	LIQLEPGEK(1)ELILLK	2	2.1755	1
TRINITY_DN721_c0_g2_m.18360	457	K	TRINITY_DN721_c0_g2|g.18360 ORF TRINITY_DN721_c0_g2|g.18360 TRINITY_DN721_c0_g2_m.18360 type:complete len:474 (+) TRINITY_DN721_c0_g2:1635-3056(+)	1	5.52825e-07	134.2	AAAAGFEK(1)GIDR	2	1.5322	1
TRINITY_DN721_c0_g2_m.18360	339	K	TRINITY_DN721_c0_g2|g.18360 ORF TRINITY_DN721_c0_g2|g.18360 TRINITY_DN721_c0_g2_m.18360 type:complete len:474 (+) TRINITY_DN721_c0_g2:1635-3056(+)	1	9.17357e-63	215.11	LGANVGSAQGPTGLGK(1)YLMR	2	-1.8044	2
TRINITY_DN721_c0_g2_m.18360	382	K	TRINITY_DN721_c0_g2|g.18360 ORF TRINITY_DN721_c0_g2|g.18360 TRINITY_DN721_c0_g2_m.18360 type:complete len:474 (+) TRINITY_DN721_c0_g2:1635-3056(+)	1	0.00559254	81.099	K(1)DIQPWQER	2	-1.5614	1
TRINITY_DN721_c0_g2_m.18361	265	K	TRINITY_DN721_c0_g2|g.18361 ORF TRINITY_DN721_c0_g2|g.18361 TRINITY_DN721_c0_g2_m.18361 type:complete len:354 (+) TRINITY_DN721_c0_g2:626-1687(+)	1	0.0132408	40.224	FWSQIFGVAFSNK(1)R	2	4.0994	1
TRINITY_DN72971_c0_g1_m.18457	130	K	TRINITY_DN72971_c0_g1|g.18457 ORF TRINITY_DN72971_c0_g1|g.18457 TRINITY_DN72971_c0_g1_m.18457 type:complete len:228 (+) TRINITY_DN72971_c0_g1:830-1513(+)	1	3.06501e-11	147.02	EDDK(1)EVK	2	0.12114	2
TRINITY_DN72971_c0_g1_m.18457	204	K	TRINITY_DN72971_c0_g1|g.18457 ORF TRINITY_DN72971_c0_g1|g.18457 TRINITY_DN72971_c0_g1_m.18457 type:complete len:228 (+) TRINITY_DN72971_c0_g1:830-1513(+)	1	9.42598e-05	65.173	AEFK(1)NGVLLVTVPK	2	0.73113	1
TRINITY_DN72971_c0_g1_m.18457	198	K	TRINITY_DN72971_c0_g1|g.18457 ORF TRINITY_DN72971_c0_g1|g.18457 TRINITY_DN72971_c0_g1_m.18457 type:complete len:228 (+) TRINITY_DN72971_c0_g1:830-1513(+)	0.894167	0.000327465	44.598	LVLPDECEK(0.106)DK(0.894)VK	2	-2.2711	1
TRINITY_DN72971_c0_g1_m.18457	168	K	TRINITY_DN72971_c0_g1|g.18457 ORF TRINITY_DN72971_c0_g1|g.18457 TRINITY_DN72971_c0_g1_m.18457 type:complete len:228 (+) TRINITY_DN72971_c0_g1:830-1513(+)	0.999844	0.0300498	46.068	SQHKEETGEK(1)K	2	-1.2119	1
TRINITY_DN72971_c0_g1_m.18457	143	K	TRINITY_DN72971_c0_g1|g.18457 ORF TRINITY_DN72971_c0_g1|g.18457 TRINITY_DN72971_c0_g1_m.18457 type:complete len:228 (+) TRINITY_DN72971_c0_g1:830-1513(+)	1	0.0345872	55.754	YDLPGLSK(1)EEVK	2	0.60958	1
TRINITY_DN72971_c0_g1_m.18457	158	K	TRINITY_DN72971_c0_g1|g.18457 ORF TRINITY_DN72971_c0_g1|g.18457 TRINITY_DN72971_c0_g1_m.18457 type:complete len:228 (+) TRINITY_DN72971_c0_g1:830-1513(+)	1	4.40986e-19	206.03	VSLEDDVLVIK(1)SQHK	2	-1.9824	1
TRINITY_DN72971_c0_g1_m.18457	162	K	TRINITY_DN72971_c0_g1|g.18457 ORF TRINITY_DN72971_c0_g1|g.18457 TRINITY_DN72971_c0_g1_m.18457 type:complete len:228 (+) TRINITY_DN72971_c0_g1:830-1513(+)	1	6.81748e-13	203.52	SQHK(1)EETGEK	2	-0.56534	1
TRINITY_DN72971_c0_g1_m.18457	214	K	TRINITY_DN72971_c0_g1|g.18457 ORF TRINITY_DN72971_c0_g1|g.18457 TRINITY_DN72971_c0_g1_m.18457 type:complete len:228 (+) TRINITY_DN72971_c0_g1:830-1513(+)	1	9.18219e-08	127.93	NGVLLVTVPK(1)SK	2	1.2018	1
TRINITY_DN72971_c0_g1_m.18457	169	K	TRINITY_DN72971_c0_g1|g.18457 ORF TRINITY_DN72971_c0_g1|g.18457 TRINITY_DN72971_c0_g1_m.18457 type:complete len:228 (+) TRINITY_DN72971_c0_g1:830-1513(+)	1	0.000224074	74.424	K(1)EGEDGWWR	2	2.0595	2
TRINITY_DN72971_c0_g1_m.18457	196	K	TRINITY_DN72971_c0_g1|g.18457 ORF TRINITY_DN72971_c0_g1|g.18457 TRINITY_DN72971_c0_g1_m.18457 type:complete len:228 (+) TRINITY_DN72971_c0_g1:830-1513(+)	1	0.00014966	76.85	LVLPDECEK(1)DK	2	-1.6894	1
TRINITY_DN72971_c0_g1_m.18457	133	K	TRINITY_DN72971_c0_g1|g.18457 ORF TRINITY_DN72971_c0_g1|g.18457 TRINITY_DN72971_c0_g1_m.18457 type:complete len:228 (+) TRINITY_DN72971_c0_g1:830-1513(+)	1	6.88904e-16	174.92	EDDKEVK(1)IR	2	1.8313	3
TRINITY_DN72971_c0_g1_m.18457	126	K	TRINITY_DN72971_c0_g1|g.18457 ORF TRINITY_DN72971_c0_g1|g.18457 TRINITY_DN72971_c0_g1_m.18457 type:complete len:228 (+) TRINITY_DN72971_c0_g1:830-1513(+)	1	1.34422e-15	137.58	APWDIK(1)EDDK	2	-2.2089	3
TRINITY_DN73357_c1_g3_m.18513	38	K	TRINITY_DN73357_c1_g3|g.18513 ORF TRINITY_DN73357_c1_g3|g.18513 TRINITY_DN73357_c1_g3_m.18513 type:complete len:103 (+) TRINITY_DN73357_c1_g3:319-627(+)	1	3.02875e-10	152.17	ASDTAAGAK(1)EK	2	-0.33881	1
TRINITY_DN73357_c1_g3_m.18513	60	K	TRINITY_DN73357_c1_g3|g.18513 ORF TRINITY_DN73357_c1_g3|g.18513 TRINITY_DN73357_c1_g3_m.18513 type:complete len:103 (+) TRINITY_DN73357_c1_g3:319-627(+)	1	3.27475e-10	137.89	ASNTAEAAK(1)EHAVEGK	2	-2.965	1
TRINITY_DN73357_c1_g3_m.18513	40	K	TRINITY_DN73357_c1_g3|g.18513 ORF TRINITY_DN73357_c1_g3|g.18513 TRINITY_DN73357_c1_g3_m.18513 type:complete len:103 (+) TRINITY_DN73357_c1_g3:319-627(+)	1	0.014307	53.028	EK(1)ASDAAAGAK	2	-0.58603	1
TRINITY_DN73357_c1_g3_m.18513	49	K	TRINITY_DN73357_c1_g3|g.18513 ORF TRINITY_DN73357_c1_g3|g.18513 TRINITY_DN73357_c1_g3_m.18513 type:complete len:103 (+) TRINITY_DN73357_c1_g3:319-627(+)	1	0.0568358	47.334	ASDAAAGAK(1)DK	2	-0.26934	1
TRINITY_DN73357_c1_g3_m.18513	7	K	TRINITY_DN73357_c1_g3|g.18513 ORF TRINITY_DN73357_c1_g3|g.18513 TRINITY_DN73357_c1_g3_m.18513 type:complete len:103 (+) TRINITY_DN73357_c1_g3:319-627(+)	1	0.00410641	66.485	ASNEDK(1)AAYHAGEAK	2	-5.0237	1
TRINITY_DN73357_c1_g3_m.18513	16	K	TRINITY_DN73357_c1_g3|g.18513 ORF TRINITY_DN73357_c1_g3|g.18513 TRINITY_DN73357_c1_g3_m.18513 type:complete len:103 (+) TRINITY_DN73357_c1_g3:319-627(+)	1	2.12266e-25	149.02	AAYHAGEAK(1)GQTQEK	2	-3.3419	1
TRINITY_DN73357_c1_g3_m.18513	29	K	TRINITY_DN73357_c1_g3|g.18513 ORF TRINITY_DN73357_c1_g3|g.18513 TRINITY_DN73357_c1_g3_m.18513 type:complete len:103 (+) TRINITY_DN73357_c1_g3:319-627(+)	1	1.74013e-12	139.94	NELLGK(1)ASDTAAGAK	2	-3.5524	3
TRINITY_DN73358_c0_g1_m.18515	106	K	TRINITY_DN73358_c0_g1|g.18515 ORF TRINITY_DN73358_c0_g1|g.18515 TRINITY_DN73358_c0_g1_m.18515 type:complete len:116 (+) TRINITY_DN73358_c0_g1:144-491(+)	0.999999	0.00219765	90.306	IVGANKDDLPK(1)K	2	-1.686	1
TRINITY_DN73358_c0_g1_m.18515	101	K	TRINITY_DN73358_c0_g1|g.18515 ORF TRINITY_DN73358_c0_g1|g.18515 TRINITY_DN73358_c0_g1_m.18515 type:complete len:116 (+) TRINITY_DN73358_c0_g1:144-491(+)	1	0.000375097	114.39	IVGANK(1)DDLPK	2	-1.4376	1
TRINITY_DN73358_c0_g1_m.18515	114	K	TRINITY_DN73358_c0_g1|g.18515 ORF TRINITY_DN73358_c0_g1|g.18515 TRINITY_DN73358_c0_g1_m.18515 type:complete len:116 (+) TRINITY_DN73358_c0_g1:144-491(+)	1	0.00100509	139.02	KIELHSNK(1)N	2	-0.31057	1
TRINITY_DN73380_c0_g1_m.18524	106	K	TRINITY_DN73380_c0_g1|g.18524 ORF TRINITY_DN73380_c0_g1|g.18524 TRINITY_DN73380_c0_g1_m.18524 type:complete len:139 (+) TRINITY_DN73380_c0_g1:144-560(+)	1	0.0159823	51.864	IDSEGK(1)AR	2	-0.76249	1
TRINITY_DN73380_c0_g1_m.18524	73	K	TRINITY_DN73380_c0_g1|g.18524 ORF TRINITY_DN73380_c0_g1|g.18524 TRINITY_DN73380_c0_g1_m.18524 type:complete len:139 (+) TRINITY_DN73380_c0_g1:144-560(+)	1	0.000108296	56.436	LVK(1)ALCADHNVHLVTIPSAK	3	-0.79648	1
TRINITY_DN73380_c0_g1_m.18524	100	K	TRINITY_DN73380_c0_g1|g.18524 ORF TRINITY_DN73380_c0_g1|g.18524 TRINITY_DN73380_c0_g1_m.18524 type:complete len:139 (+) TRINITY_DN73380_c0_g1:144-560(+)	1	9.21101e-09	104.49	TLGEWAGLCK(1)IDSEGK	2	1.4885	1
TRINITY_DN73687_c0_g1_m.18572	55	K	TRINITY_DN73687_c0_g1|g.18572 ORF TRINITY_DN73687_c0_g1|g.18572 TRINITY_DN73687_c0_g1_m.18572 type:complete len:117 (+) TRINITY_DN73687_c0_g1:169-519(+)	1	0.000152387	61.067	FDANK(1)HVEDLDTIDR	2	-2.874	2
TRINITY_DN73715_c0_g1_m.18577	74	K	TRINITY_DN73715_c0_g1|g.18577 ORF TRINITY_DN73715_c0_g1|g.18577 TRINITY_DN73715_c0_g1_m.18577 type:complete len:136 (+) TRINITY_DN73715_c0_g1:107-514(+)	1	1.06772e-05	77.696	NADVTNPK(1)VIDMLLFK	2	3.0652	1
TRINITY_DN73715_c0_g1_m.18577	127	K	TRINITY_DN73715_c0_g1|g.18577 ORF TRINITY_DN73715_c0_g1|g.18577 TRINITY_DN73715_c0_g1_m.18577 type:complete len:136 (+) TRINITY_DN73715_c0_g1:107-514(+)	1	0.0119003	60.892	DEGASDFLK(1)R	2	-0.86331	1
TRINITY_DN73715_c0_g1_m.18577	95	K	TRINITY_DN73715_c0_g1|g.18577 ORF TRINITY_DN73715_c0_g1|g.18577 TRINITY_DN73715_c0_g1_m.18577 type:complete len:136 (+) TRINITY_DN73715_c0_g1:107-514(+)	1	2.4406e-12	130.65	AMEELTNVVDHAK(1)QR	2	-4.9027	1
TRINITY_DN73825_c0_g1_m.18587	170	K	TRINITY_DN73825_c0_g1|g.18587 ORF TRINITY_DN73825_c0_g1|g.18587 TRINITY_DN73825_c0_g1_m.18587 type:complete len:204 (+) TRINITY_DN73825_c0_g1:141-752(+)	1	0.0074979	84.368	MTAEIK(1)SR	2	0.98508	1
TRINITY_DN73825_c0_g1_m.18587	55	K	TRINITY_DN73825_c0_g1|g.18587 ORF TRINITY_DN73825_c0_g1|g.18587 TRINITY_DN73825_c0_g1_m.18587 type:complete len:204 (+) TRINITY_DN73825_c0_g1:141-752(+)	1	0.00218209	61.48	TVEQDGK(1)TIK	2	0.37448	1
TRINITY_DN73911_c0_g1_m.18592	391	K	TRINITY_DN73911_c0_g1|g.18592 ORF TRINITY_DN73911_c0_g1|g.18592 TRINITY_DN73911_c0_g1_m.18592 type:complete len:536 (+) TRINITY_DN73911_c0_g1:117-1724(+)	1	0.000578992	77.431	GPNDHTIAQIK(1)DAVR	2	-5.5018	2
TRINITY_DN73911_c0_g1_m.18592	137	K	TRINITY_DN73911_c0_g1|g.18592 ORF TRINITY_DN73911_c0_g1|g.18592 TRINITY_DN73911_c0_g1_m.18592 type:complete len:536 (+) TRINITY_DN73911_c0_g1:117-1724(+)	0.999999	0.000336259	62.494	FK(1)TPVVMGETPDKEILK	3	1.4578	2
TRINITY_DN73911_c0_g1_m.18592	40	K	TRINITY_DN73911_c0_g1|g.18592 ORF TRINITY_DN73911_c0_g1|g.18592 TRINITY_DN73911_c0_g1_m.18592 type:complete len:536 (+) TRINITY_DN73911_c0_g1:117-1724(+)	1	0.0622259	47.561	TNLGPK(1)GTIK	2	-0.37315	1
TRINITY_DN73911_c0_g1_m.18592	202	K	TRINITY_DN73911_c0_g1|g.18592 ORF TRINITY_DN73911_c0_g1|g.18592 TRINITY_DN73911_c0_g1_m.18592 type:complete len:536 (+) TRINITY_DN73911_c0_g1:117-1724(+)	1	0.0296658	60.892	HK(1)FDVDTR	2	0.48078	1
TRINITY_DN73911_c0_g1_m.18592	430	K	TRINITY_DN73911_c0_g1|g.18592 ORF TRINITY_DN73911_c0_g1|g.18592 TRINITY_DN73911_c0_g1_m.18592 type:complete len:536 (+) TRINITY_DN73911_c0_g1:117-1724(+)	1	4.9445e-05	121.31	QHLINNVK(1)K	2	0.94375	1
TRINITY_DN74118_c0_g1_m.18622	11	K	TRINITY_DN74118_c0_g1|g.18622 ORF TRINITY_DN74118_c0_g1|g.18622 TRINITY_DN74118_c0_g1_m.18622 type:complete len:123 (+) TRINITY_DN74118_c0_g1:147-515(+)	1	3.11861e-06	91.993	LHQLQTK(1)AVQASQFVAK	3	0.25935	2
TRINITY_DN74118_c0_g1_m.18622	4	K	TRINITY_DN74118_c0_g1|g.18622 ORF TRINITY_DN74118_c0_g1|g.18622 TRINITY_DN74118_c0_g1_m.18622 type:complete len:123 (+) TRINITY_DN74118_c0_g1:147-515(+)	1	2.24761e-10	148.9	ASK(1)LHQLQTK	2	-0.19432	1
TRINITY_DN74118_c0_g1_m.18622	77	K	TRINITY_DN74118_c0_g1|g.18622 ORF TRINITY_DN74118_c0_g1|g.18622 TRINITY_DN74118_c0_g1_m.18622 type:complete len:123 (+) TRINITY_DN74118_c0_g1:147-515(+)	1	2.26069e-09	192.6	ELEGVK(1)HIWR	2	0.99499	1
TRINITY_DN74118_c0_g1_m.18622	28	K	TRINITY_DN74118_c0_g1|g.18622 ORF TRINITY_DN74118_c0_g1|g.18622 TRINITY_DN74118_c0_g1_m.18622 type:complete len:123 (+) TRINITY_DN74118_c0_g1:147-515(+)	1	3.52789e-08	89.382	HGTSYYK(1)QLLEQNK	2	-0.95245	1
TRINITY_DN74118_c0_g1_m.18622	21	K	TRINITY_DN74118_c0_g1|g.18622 ORF TRINITY_DN74118_c0_g1|g.18622 TRINITY_DN74118_c0_g1_m.18622 type:complete len:123 (+) TRINITY_DN74118_c0_g1:147-515(+)	1	3.54689e-27	157.54	AVQASQFVAK(1)HGTSYYK	2	-1.6965	1
TRINITY_DN74118_c0_g1_m.18622	71	K	TRINITY_DN74118_c0_g1|g.18622 ORF TRINITY_DN74118_c0_g1|g.18622 TRINITY_DN74118_c0_g1_m.18622 type:complete len:123 (+) TRINITY_DN74118_c0_g1:147-515(+)	1	2.57033e-05	105.94	YESFWK(1)ELEGVK	2	2.779	1
TRINITY_DN74386_c0_g1_m.18654	116	K	TRINITY_DN74386_c0_g1|g.18654 ORF TRINITY_DN74386_c0_g1|g.18654 TRINITY_DN74386_c0_g1_m.18654 type:3prime_partial len:185 (+) TRINITY_DN74386_c0_g1:214-765(+)	1	0.0014156	57.888	ANIEQYCSK(1)R	2	-0.72738	1
TRINITY_DN75140_c0_g1_m.18753	149	K	TRINITY_DN75140_c0_g1|g.18753 ORF TRINITY_DN75140_c0_g1|g.18753 TRINITY_DN75140_c0_g1_m.18753 type:complete len:338 (+) TRINITY_DN75140_c0_g1:187-1200(+)	1	1.24249e-36	192.68	LCLEPTSFTVK(1)AEGVSK	2	-1.28	3
TRINITY_DN75140_c0_g1_m.18753	130	K	TRINITY_DN75140_c0_g1|g.18753 ORF TRINITY_DN75140_c0_g1|g.18753 TRINITY_DN75140_c0_g1_m.18753 type:complete len:338 (+) TRINITY_DN75140_c0_g1:187-1200(+)	1	2.16652e-22	179.92	GSGTANQCPTIEGGVDSFVFK(1)PGK	3	2.1729	2
TRINITY_DN75140_c0_g1_m.18753	155	K	TRINITY_DN75140_c0_g1|g.18753 ORF TRINITY_DN75140_c0_g1|g.18753 TRINITY_DN75140_c0_g1_m.18753 type:complete len:338 (+) TRINITY_DN75140_c0_g1:187-1200(+)	1	7.18945e-45	220.06	AEGVSK(1)NAPPDFQPTK	2	-2.5311	1
TRINITY_DN75140_c0_g1_m.18753	194	K	TRINITY_DN75140_c0_g1|g.18753 ORF TRINITY_DN75140_c0_g1|g.18753 TRINITY_DN75140_c0_g1_m.18753 type:complete len:338 (+) TRINITY_DN75140_c0_g1:187-1200(+)	1	7.59368e-07	89.636	FEEK(1)DGIDYAAVTVQLPGGER	3	0.48252	1
TRINITY_DN75140_c0_g1_m.18753	165	K	TRINITY_DN75140_c0_g1|g.18753 ORF TRINITY_DN75140_c0_g1|g.18753 TRINITY_DN75140_c0_g1_m.18753 type:complete len:338 (+) TRINITY_DN75140_c0_g1:187-1200(+)	1	3.26712e-05	86.729	NAPPDFQPTK(1)LMTR	2	-1.5124	1
TRINITY_DN75140_c0_g1_m.18753	248	K	TRINITY_DN75140_c0_g1|g.18753 ORF TRINITY_DN75140_c0_g1|g.18753 TRINITY_DN75140_c0_g1_m.18753 type:complete len:338 (+) TRINITY_DN75140_c0_g1:187-1200(+)	1	1.43459e-06	137.84	GSSFLDPK(1)GR	2	-1.5458	1
TRINITY_DN75140_c0_g1_m.18753	287	K	TRINITY_DN75140_c0_g1|g.18753 ORF TRINITY_DN75140_c0_g1|g.18753 TRINITY_DN75140_c0_g1_m.18753 type:complete len:338 (+) TRINITY_DN75140_c0_g1:187-1200(+)	1	0.000732201	80.128	NTSSSNGK(1)ISLSVSK	2	-2.7228	1
TRINITY_DN75140_c0_g1_m.18753	226	K	TRINITY_DN75140_c0_g1|g.18753 ORF TRINITY_DN75140_c0_g1|g.18753 TRINITY_DN75140_c0_g1_m.18753 type:complete len:338 (+) TRINITY_DN75140_c0_g1:187-1200(+)	1	0.00237665	42.218	QLVATGK(1)PEAFGGQFLVPSYR	3	-0.57581	1
TRINITY_DN75140_c0_g1_m.18753	279	K	TRINITY_DN75140_c0_g1|g.18753 ORF TRINITY_DN75140_c0_g1|g.18753 TRINITY_DN75140_c0_g1_m.18753 type:complete len:338 (+) TRINITY_DN75140_c0_g1:187-1200(+)	1	1.75709e-15	162.21	ENIK(1)NTSSSNGK	2	1.134	1
TRINITY_DN75140_c0_g1_m.18753	103	K	TRINITY_DN75140_c0_g1|g.18753 ORF TRINITY_DN75140_c0_g1|g.18753 TRINITY_DN75140_c0_g1_m.18753 type:complete len:338 (+) TRINITY_DN75140_c0_g1:187-1200(+)	1	3.37146e-26	196.38	LTFDEIQSK(1)TYMEVK	2	-0.26351	1
TRINITY_DN75140_c0_g1_m.18753	294	K	TRINITY_DN75140_c0_g1|g.18753 ORF TRINITY_DN75140_c0_g1|g.18753 TRINITY_DN75140_c0_g1_m.18753 type:complete len:338 (+) TRINITY_DN75140_c0_g1:187-1200(+)	1	0.0178022	52.591	ISLSVSK(1)SK	2	-0.72581	1
TRINITY_DN75140_c0_g1_m.18753	275	K	TRINITY_DN75140_c0_g1|g.18753 ORF TRINITY_DN75140_c0_g1|g.18753 TRINITY_DN75140_c0_g1_m.18753 type:complete len:338 (+) TRINITY_DN75140_c0_g1:187-1200(+)	1	1.21227e-29	211.68	GDEEELTK(1)ENIK	2	2.0731	1
TRINITY_DN75602_c0_g1_m.18808	67	K	TRINITY_DN75602_c0_g1|g.18808 ORF TRINITY_DN75602_c0_g1|g.18808 TRINITY_DN75602_c0_g1_m.18808 type:3prime_partial len:157 (+) TRINITY_DN75602_c0_g1:43-510(+)	1	0.00486255	80.128	AGSFK(1)HTAGNWAADPDDK	2	-3.4384	1
TRINITY_DN75629_c0_g1_m.18812	309	K	TRINITY_DN75629_c0_g1|g.18812 ORF TRINITY_DN75629_c0_g1|g.18812 TRINITY_DN75629_c0_g1_m.18812 type:complete len:579 (+) TRINITY_DN75629_c0_g1:219-1955(+)	1	0.0152998	44.598	VVHELK(1)DYLQK	2	-1.5649	1
TRINITY_DN75629_c0_g1_m.18812	303	K	TRINITY_DN75629_c0_g1|g.18812 ORF TRINITY_DN75629_c0_g1|g.18812 TRINITY_DN75629_c0_g1_m.18812 type:complete len:579 (+) TRINITY_DN75629_c0_g1:219-1955(+)	1	0.00339108	83.438	DAK(1)VVHELK	2	-0.87259	1
TRINITY_DN75655_c0_g1_m.18814	43	K	TRINITY_DN75655_c0_g1|g.18814 ORF TRINITY_DN75655_c0_g1|g.18814 TRINITY_DN75655_c0_g1_m.18814 type:complete len:267 (+) TRINITY_DN75655_c0_g1:227-1027(+)	1	1.97044e-34	195.36	TVGK(1)ATSGSPWYGPDR	2	-1.29	1
TRINITY_DN75765_c0_g1_m.18827	228	K	TRINITY_DN75765_c0_g1|g.18827 ORF TRINITY_DN75765_c0_g1|g.18827 TRINITY_DN75765_c0_g1_m.18827 type:complete len:369 (+) TRINITY_DN75765_c0_g1:110-1216(+)	1	2.41921e-09	124.24	SGGLETEK(1)DYPYSGTDR	2	-0.26509	1
TRINITY_DN75805_c0_g2_m.18833	176	K	TRINITY_DN75805_c0_g2|g.18833 ORF TRINITY_DN75805_c0_g2|g.18833 TRINITY_DN75805_c0_g2_m.18833 type:complete len:214 (+) TRINITY_DN75805_c0_g2:295-936(+)	1	0.00106959	64.266	IK(1)DAIATHNTAR	2	-2.5825	1
TRINITY_DN75897_c0_g2_m.18871	281	K	TRINITY_DN75897_c0_g2|g.18871 ORF TRINITY_DN75897_c0_g2|g.18871 TRINITY_DN75897_c0_g2_m.18871 type:complete len:731 (+) TRINITY_DN75897_c0_g2:129-2321(+)	1	0.0187506	42.835	TWTK(1)EHLK	2	1.1742	1
TRINITY_DN76537_c0_g1_m.18960	71	K	TRINITY_DN76537_c0_g1|g.18960 ORF TRINITY_DN76537_c0_g1|g.18960 TRINITY_DN76537_c0_g1_m.18960 type:complete len:154 (+) TRINITY_DN76537_c0_g1:58-519(+)	1	0.0379708	56.014	TDHNFK(1)K	2	-1.303	1
TRINITY_DN76591_c0_g2_m.18968	42	K	TRINITY_DN76591_c0_g2|g.18968 ORF TRINITY_DN76591_c0_g2|g.18968 TRINITY_DN76591_c0_g2_m.18968 type:5prime_partial len:165 (+) TRINITY_DN76591_c0_g2:1-495(+)	1	0.00165402	40.53	GDSLFIIHVK(1)SPSADESK	3	-3.135	1
TRINITY_DN76591_c0_g2_m.18968	95	K	TRINITY_DN76591_c0_g2|g.18968 ORF TRINITY_DN76591_c0_g2|g.18968 TRINITY_DN76591_c0_g2_m.18968 type:5prime_partial len:165 (+) TRINITY_DN76591_c0_g2:1-495(+)	1	0.0116502	79.809	QK(1)QVAIVMK	2	-2.752	1
TRINITY_DN76765_c0_g1_m.18999	192	K	TRINITY_DN76765_c0_g1|g.18999 ORF TRINITY_DN76765_c0_g1|g.18999 TRINITY_DN76765_c0_g1_m.18999 type:complete len:402 (+) TRINITY_DN76765_c0_g1:246-1451(+)	0.999994	0.0321747	53.051	EKPVEESSPEYEK(1)LK	2	-1.8106	1
TRINITY_DN76774_c0_g1_m.19000	237	K	TRINITY_DN76774_c0_g1|g.19000 ORF TRINITY_DN76774_c0_g1|g.19000 TRINITY_DN76774_c0_g1_m.19000 type:complete len:376 (+) TRINITY_DN76774_c0_g1:209-1336(+)	1	6.63837e-06	101.82	VADNFK(1)TSAR	2	-1.1835	1
TRINITY_DN76774_c0_g1_m.19000	137	K	TRINITY_DN76774_c0_g1|g.19000 ORF TRINITY_DN76774_c0_g1|g.19000 TRINITY_DN76774_c0_g1_m.19000 type:complete len:376 (+) TRINITY_DN76774_c0_g1:209-1336(+)	1	0.00764062	60.589	IEDDMK(1)IR	2	-0.56987	1
TRINITY_DN76774_c0_g1_m.19000	72	K	TRINITY_DN76774_c0_g1|g.19000 ORF TRINITY_DN76774_c0_g1|g.19000 TRINITY_DN76774_c0_g1_m.19000 type:complete len:376 (+) TRINITY_DN76774_c0_g1:209-1336(+)	1	1.67799e-16	190.68	LNTFIEGVSHK(1)IR	2	-1.2269	1
TRINITY_DN76851_c0_g1_m.19011	52	K	TRINITY_DN76851_c0_g1|g.19011 ORF TRINITY_DN76851_c0_g1|g.19011 TRINITY_DN76851_c0_g1_m.19011 type:complete len:249 (+) TRINITY_DN76851_c0_g1:73-819(+)	1	0.00534663	56.202	EK(1)PVHQVLGGGK	2	-1.3862	1
TRINITY_DN76851_c0_g1_m.19011	233	K	TRINITY_DN76851_c0_g1|g.19011 ORF TRINITY_DN76851_c0_g1|g.19011 TRINITY_DN76851_c0_g1_m.19011 type:complete len:249 (+) TRINITY_DN76851_c0_g1:73-819(+)	1	0.000768899	106	QYAVFDAK(1)VLSK	2	-1.2705	1
TRINITY_DN76851_c0_g1_m.19011	218	K	TRINITY_DN76851_c0_g1|g.19011 ORF TRINITY_DN76851_c0_g1|g.19011 TRINITY_DN76851_c0_g1_m.19011 type:complete len:249 (+) TRINITY_DN76851_c0_g1:73-819(+)	1	9.07372e-06	104.04	IDSFGEK(1)AIAEIK	2	-0.1039	3
TRINITY_DN76851_c0_g1_m.19011	62	K	TRINITY_DN76851_c0_g1|g.19011 ORF TRINITY_DN76851_c0_g1|g.19011 TRINITY_DN76851_c0_g1_m.19011 type:complete len:249 (+) TRINITY_DN76851_c0_g1:73-819(+)	0.999999	1.33252e-06	80.049	EKPVHQVLGGGK(1)PADLFLWR	3	-3.332	2
TRINITY_DN76932_c0_g1_m.19034	529	K	TRINITY_DN76932_c0_g1|g.19034 ORF TRINITY_DN76932_c0_g1|g.19034 TRINITY_DN76932_c0_g1_m.19034 type:complete len:625 (+) TRINITY_DN76932_c0_g1:185-2059(+)	1	0.000980984	76.572	LK(1)QLELENEK	2	-1.491	1
TRINITY_DN76934_c0_g1_m.19035	283	K	TRINITY_DN76934_c0_g1|g.19035 ORF TRINITY_DN76934_c0_g1|g.19035 TRINITY_DN76934_c0_g1_m.19035 type:complete len:804 (+) TRINITY_DN76934_c0_g1:152-2563(+)	1	0.0172967	45.939	DDK(1)GFAHPER	2	2.1429	1
TRINITY_DN76939_c0_g1_m.19038	71	K	TRINITY_DN76939_c0_g1|g.19038 ORF TRINITY_DN76939_c0_g1|g.19038 TRINITY_DN76939_c0_g1_m.19038 type:5prime_partial len:186 (+) TRINITY_DN76939_c0_g1:3-560(+)	1	5.74077e-10	103.17	TDYAVK(1)VSGVDIDPYPVAR	2	-0.34783	1
TRINITY_DN77008_c0_g1_m.19048	92	K	TRINITY_DN77008_c0_g1|g.19048 ORF TRINITY_DN77008_c0_g1|g.19048 TRINITY_DN77008_c0_g1_m.19048 type:3prime_partial len:213 (+) TRINITY_DN77008_c0_g1:171-806(+)	1	2.98519e-15	207.41	VPSLEHNNEVK(1)GESLDLLK	2	-3.0546	2
TRINITY_DN77008_c0_g1_m.19048	196	K	TRINITY_DN77008_c0_g1|g.19048 ORF TRINITY_DN77008_c0_g1|g.19048 TRINITY_DN77008_c0_g1_m.19048 type:3prime_partial len:213 (+) TRINITY_DN77008_c0_g1:171-806(+)	1	2.01308e-25	205.26	FQLFLAELK(1)NYDVTK	2	5.0904	1
TRINITY_DN77008_c0_g1_m.19048	10	K	TRINITY_DN77008_c0_g1|g.19048 ORF TRINITY_DN77008_c0_g1|g.19048 TRINITY_DN77008_c0_g1_m.19048 type:3prime_partial len:213 (+) TRINITY_DN77008_c0_g1:171-806(+)	1	7.07298e-07	54.747	AAAVAGSYK(1)EELPPTLDATAEPPALFDGTTR	3	0.4765	1
TRINITY_DN77008_c0_g1_m.19048	202	K	TRINITY_DN77008_c0_g1|g.19048 ORF TRINITY_DN77008_c0_g1|g.19048 TRINITY_DN77008_c0_g1_m.19048 type:3prime_partial len:213 (+) TRINITY_DN77008_c0_g1:171-806(+)	1	0.000449837	95.311	NYDVTK(1)GRPK	2	2.09	3
TRINITY_DN77153_c0_g1_m.19086	309	K	TRINITY_DN77153_c0_g1|g.19086 ORF TRINITY_DN77153_c0_g1|g.19086 TRINITY_DN77153_c0_g1_m.19086 type:complete len:444 (+) TRINITY_DN77153_c0_g1:216-1547(+)	1	1.76226e-18	165.02	VINDTK(1)WLEQEFTER	2	1.8727	1
TRINITY_DN77153_c0_g1_m.19086	385	K	TRINITY_DN77153_c0_g1|g.19086 ORF TRINITY_DN77153_c0_g1|g.19086 TRINITY_DN77153_c0_g1_m.19086 type:complete len:444 (+) TRINITY_DN77153_c0_g1:216-1547(+)	1	0.000688134	103.76	SK(1)GDGDYELVK	2	1.3452	2
TRINITY_DN77153_c0_g1_m.19086	329	K	TRINITY_DN77153_c0_g1|g.19086 ORF TRINITY_DN77153_c0_g1|g.19086 TRINITY_DN77153_c0_g1_m.19086 type:complete len:444 (+) TRINITY_DN77153_c0_g1:216-1547(+)	1	0.0108204	79.809	GGVLIQK(1)WGR	2	-3.6868	1
TRINITY_DN77153_c0_g1_m.19086	417	K	TRINITY_DN77153_c0_g1|g.19086 ORF TRINITY_DN77153_c0_g1|g.19086 TRINITY_DN77153_c0_g1_m.19086 type:complete len:444 (+) TRINITY_DN77153_c0_g1:216-1547(+)	1	5.34027e-06	139.02	TEAELIAEK(1)R	2	-1.9889	1
TRINITY_DN77401_c0_g1_m.19110	149	K	TRINITY_DN77401_c0_g1|g.19110 ORF TRINITY_DN77401_c0_g1|g.19110 TRINITY_DN77401_c0_g1_m.19110 type:complete len:278 (+) TRINITY_DN77401_c0_g1:90-923(+)	1	5.97053e-13	167.01	QDLTVQGQTLTQDFK(1)K	2	-2.9082	1
TRINITY_DN77401_c0_g1_m.19110	92	K	TRINITY_DN77401_c0_g1|g.19110 ORF TRINITY_DN77401_c0_g1|g.19110 TRINITY_DN77401_c0_g1_m.19110 type:complete len:278 (+) TRINITY_DN77401_c0_g1:90-923(+)	1	0.00369678	90.761	AEK(1)DAHSR	2	-0.05929	1
TRINITY_DN77401_c0_g1_m.19110	75	K	TRINITY_DN77401_c0_g1|g.19110 ORF TRINITY_DN77401_c0_g1|g.19110 TRINITY_DN77401_c0_g1_m.19110 type:complete len:278 (+) TRINITY_DN77401_c0_g1:90-923(+)	1	0.000316971	102.55	AAVK(1)EEIHR	2	0.60743	1
TRINITY_DN77903_c0_g2_m.19165	128	K	TRINITY_DN77903_c0_g2|g.19165 ORF TRINITY_DN77903_c0_g2|g.19165 TRINITY_DN77903_c0_g2_m.19165 type:complete len:223 (+) TRINITY_DN77903_c0_g2:276-944(+)	1	1.18353e-28	228.06	LNKGEELEETK(1)K	2	-2.0597	2
TRINITY_DN77903_c0_g2_m.19165	35	K	TRINITY_DN77903_c0_g2|g.19165 ORF TRINITY_DN77903_c0_g2|g.19165 TRINITY_DN77903_c0_g2_m.19165 type:complete len:223 (+) TRINITY_DN77903_c0_g2:276-944(+)	1	4.42549e-17	163.93	GVEYEYK(1)EENLSEK	2	-2.4196	1
TRINITY_DN77903_c0_g2_m.19165	190	K	TRINITY_DN77903_c0_g2|g.19165 ORF TRINITY_DN77903_c0_g2|g.19165 TRINITY_DN77903_c0_g2_m.19165 type:complete len:223 (+) TRINITY_DN77903_c0_g2:276-944(+)	1	0.00921728	67.889	LAAWGK(1)R	2	-2.1897	1
TRINITY_DN77903_c0_g2_m.19165	120	K	TRINITY_DN77903_c0_g2|g.19165 ORF TRINITY_DN77903_c0_g2|g.19165 TRINITY_DN77903_c0_g2_m.19165 type:complete len:223 (+) TRINITY_DN77903_c0_g2:276-944(+)	1	8.11166e-10	140.57	LNK(1)GEELEETK	2	-1.4882	3
TRINITY_DN77903_c0_g2_m.19165	145	K	TRINITY_DN77903_c0_g2|g.19165 ORF TRINITY_DN77903_c0_g2|g.19165 TRINITY_DN77903_c0_g2_m.19165 type:complete len:223 (+) TRINITY_DN77903_c0_g2:276-944(+)	1	0.000227536	78.932	TLEAELGEK(1)K	2	1.5755	1
TRINITY_DN77903_c0_g2_m.19165	48	K	TRINITY_DN77903_c0_g2|g.19165 ORF TRINITY_DN77903_c0_g2|g.19165 TRINITY_DN77903_c0_g2_m.19165 type:complete len:223 (+) TRINITY_DN77903_c0_g2:276-944(+)	1	3.43762e-07	106	SELLLK(1)SNPVHK	2	0.28739	1
TRINITY_DN78180_c0_g2_m.19215	237	K	TRINITY_DN78180_c0_g2|g.19215 ORF TRINITY_DN78180_c0_g2|g.19215 TRINITY_DN78180_c0_g2_m.19215 type:complete len:311 (+) TRINITY_DN78180_c0_g2:217-1149(+)	1	7.07014e-23	195.8	AGGLQDK(1)DGGLR	2	0.14888	1
TRINITY_DN78180_c0_g2_m.19215	248	K	TRINITY_DN78180_c0_g2|g.19215 ORF TRINITY_DN78180_c0_g2|g.19215 TRINITY_DN78180_c0_g2_m.19215 type:complete len:311 (+) TRINITY_DN78180_c0_g2:217-1149(+)	1	2.29561e-15	207.67	ELLVGK(1)NDELLK	2	-1.2785	1
TRINITY_DN78180_c0_g2_m.19215	102	K	TRINITY_DN78180_c0_g2|g.19215 ORF TRINITY_DN78180_c0_g2|g.19215 TRINITY_DN78180_c0_g2_m.19215 type:complete len:311 (+) TRINITY_DN78180_c0_g2:217-1149(+)	1	6.48411e-19	189.13	EK(1)IGGADDVFVADIR	2	-0.070752	1
TRINITY_DN78180_c0_g2_m.19215	288	K	TRINITY_DN78180_c0_g2|g.19215 ORF TRINITY_DN78180_c0_g2|g.19215 TRINITY_DN78180_c0_g2_m.19215 type:complete len:311 (+) TRINITY_DN78180_c0_g2:217-1149(+)	1	6.93539e-10	125.75	AFDLASK(1)PEGTGTPTTDFK	2	-1.1317	1
TRINITY_DN78180_c0_g2_m.19215	79	K	TRINITY_DN78180_c0_g2|g.19215 ORF TRINITY_DN78180_c0_g2|g.19215 TRINITY_DN78180_c0_g2_m.19215 type:complete len:311 (+) TRINITY_DN78180_c0_g2:217-1149(+)	1	0.02513	49.325	TGQIVYK(1)K	2	0.46626	1
TRINITY_DN78180_c0_g2_m.19215	281	K	TRINITY_DN78180_c0_g2|g.19215 ORF TRINITY_DN78180_c0_g2|g.19215 TRINITY_DN78180_c0_g2_m.19215 type:complete len:311 (+) TRINITY_DN78180_c0_g2:217-1149(+)	1	5.02968e-22	167.19	FK(1)AFDLASKPEGTGTPTTDFK	3	-0.49884	1
TRINITY_DN78180_c0_g2_m.19215	178	K	TRINITY_DN78180_c0_g2|g.19215 ORF TRINITY_DN78180_c0_g2|g.19215 TRINITY_DN78180_c0_g2_m.19215 type:complete len:311 (+) TRINITY_DN78180_c0_g2:217-1149(+)	1	0.000421061	110.88	NQIDAAK(1)AAGVK	2	-1.6471	1
TRINITY_DN78180_c0_g2_m.19215	300	K	TRINITY_DN78180_c0_g2|g.19215 ORF TRINITY_DN78180_c0_g2|g.19215 TRINITY_DN78180_c0_g2_m.19215 type:complete len:311 (+) TRINITY_DN78180_c0_g2:217-1149(+)	0.999999	4.07506e-19	114.95	AFDLASKPEGTGTPTTDFK(1)ALFSLTSER	3	0.99142	1
TRINITY_DN78244_c0_g1_m.19223	87	K	TRINITY_DN78244_c0_g1|g.19223 ORF TRINITY_DN78244_c0_g1|g.19223 TRINITY_DN78244_c0_g1_m.19223 type:complete len:196 (+) TRINITY_DN78244_c0_g1:165-752(+)	1	1.91064e-05	89.382	FEVVSGSTSK(1)TWER	2	-3.6429	1
TRINITY_DN78244_c0_g1_m.19223	120	K	TRINITY_DN78244_c0_g1|g.19223 ORF TRINITY_DN78244_c0_g1|g.19223 TRINITY_DN78244_c0_g1_m.19223 type:complete len:196 (+) TRINITY_DN78244_c0_g1:165-752(+)	1	1.67326e-07	113.46	GAFQGSPAVIK(1)FR	2	-1.8746	1
TRINITY_DN78244_c0_g1_m.19223	107	K	TRINITY_DN78244_c0_g1|g.19223 ORF TRINITY_DN78244_c0_g1|g.19223 TRINITY_DN78244_c0_g1_m.19223 type:complete len:196 (+) TRINITY_DN78244_c0_g1:165-752(+)	1	0.00957786	53.773	LDAGATASHSFVLESK(1)VK	3	-1.3073	1
TRINITY_DN78381_c0_g1_m.19249	167	K	TRINITY_DN78381_c0_g1|g.19249 ORF TRINITY_DN78381_c0_g1|g.19249 TRINITY_DN78381_c0_g1_m.19249 type:internal len:259 (+) TRINITY_DN78381_c0_g1:2-775(+)	1	1.11242e-06	110.14	FFYK(1)GYESALGHPIDESR	3	-1.64	2
TRINITY_DN78455_c0_g1_m.19256	180	K	TRINITY_DN78455_c0_g1|g.19256 ORF TRINITY_DN78455_c0_g1|g.19256 TRINITY_DN78455_c0_g1_m.19256 type:complete len:270 (+) TRINITY_DN78455_c0_g1:101-910(+)	1	4.96933e-16	145.95	YPLVSDVTK(1)SIAK	2	1.2422	1
TRINITY_DN78455_c0_g1_m.19256	99	K	TRINITY_DN78455_c0_g1|g.19256 ORF TRINITY_DN78455_c0_g1|g.19256 TRINITY_DN78455_c0_g1_m.19256 type:complete len:270 (+) TRINITY_DN78455_c0_g1:101-910(+)	1	0.0106784	74.269	VK(1)LSDYIGK	2	-4.5089	1
TRINITY_DN78455_c0_g1_m.19256	260	K	TRINITY_DN78455_c0_g1|g.19256 ORF TRINITY_DN78455_c0_g1|g.19256 TRINITY_DN78455_c0_g1_m.19256 type:complete len:270 (+) TRINITY_DN78455_c0_g1:101-910(+)	1	0.0180854	86.205	SMKPDPK(1)R	2	1.4497	2
TRINITY_DN78658_c0_g1_m.19296	94	K	TRINITY_DN78658_c0_g1|g.19296 ORF TRINITY_DN78658_c0_g1|g.19296 TRINITY_DN78658_c0_g1_m.19296 type:complete len:237 (+) TRINITY_DN78658_c0_g1:62-772(+)	1	0.000412247	111.61	TFIAIK(1)PDGVQR	2	-4.1157	1
TRINITY_DN78658_c0_g1_m.19296	138	K	TRINITY_DN78658_c0_g1|g.19296 ORF TRINITY_DN78658_c0_g1|g.19296 TRINITY_DN78658_c0_g1_m.19296 type:complete len:237 (+) TRINITY_DN78658_c0_g1:62-772(+)	1	7.176e-05	52.662	LVVPSNEFAQQHYHDLK(1)ER	3	1.55	1
TRINITY_DN78834_c0_g3_m.19326	271	K	TRINITY_DN78834_c0_g3|g.19326 ORF TRINITY_DN78834_c0_g3|g.19326 TRINITY_DN78834_c0_g3_m.19326 type:complete len:289 (+) TRINITY_DN78834_c0_g3:507-1373(+)	1	1.44594e-07	168.05	SGSQK(1)ANEAITK	2	0.76683	1
TRINITY_DN78834_c0_g3_m.19326	244	K	TRINITY_DN78834_c0_g3|g.19326 ORF TRINITY_DN78834_c0_g3|g.19326 TRINITY_DN78834_c0_g3_m.19326 type:complete len:289 (+) TRINITY_DN78834_c0_g3:507-1373(+)	1	5.04817e-07	150.53	NLLSK(1)LVQAK	2	0.38982	1
TRINITY_DN78834_c0_g3_m.19326	253	K	TRINITY_DN78834_c0_g3|g.19326 ORF TRINITY_DN78834_c0_g3|g.19326 TRINITY_DN78834_c0_g3_m.19326 type:complete len:289 (+) TRINITY_DN78834_c0_g3:507-1373(+)	1	0.00823981	50.834	ELLK(1)EYVDR	2	-0.69897	1
TRINITY_DN78834_c0_g3_m.19326	249	K	TRINITY_DN78834_c0_g3|g.19326 ORF TRINITY_DN78834_c0_g3|g.19326 TRINITY_DN78834_c0_g3_m.19326 type:complete len:289 (+) TRINITY_DN78834_c0_g3:507-1373(+)	1	0.00885185	88.181	LVQAK(1)ELLK	2	-2.9065	1
TRINITY_DN78853_c0_g1_m.19329	80	K	TRINITY_DN78853_c0_g1|g.19329 ORF TRINITY_DN78853_c0_g1|g.19329 TRINITY_DN78853_c0_g1_m.19329 type:complete len:122 (+) TRINITY_DN78853_c0_g1:103-468(+)	1	0.00167814	88.181	EVASK(1)MEVK	2	-0.32227	1
TRINITY_DN78853_c0_g1_m.19329	14	K	TRINITY_DN78853_c0_g1|g.19329 ORF TRINITY_DN78853_c0_g1|g.19329 TRINITY_DN78853_c0_g1_m.19329 type:complete len:122 (+) TRINITY_DN78853_c0_g1:103-468(+)	1	2.72983e-06	77.431	VLK(1)VESGESWESFMAQAK	2	3.3267	1
TRINITY_DN78853_c0_g1_m.19329	110	K	TRINITY_DN78853_c0_g1|g.19329 ORF TRINITY_DN78853_c0_g1|g.19329 TRINITY_DN78853_c0_g1_m.19329 type:complete len:122 (+) TRINITY_DN78853_c0_g1:103-468(+)	1	0.0639899	70.389	MVGANPEEIK(1)K	2	2.7919	1
TRINITY_DN79233_c0_g1_m.19427	143	K	TRINITY_DN79233_c0_g1|g.19427 ORF TRINITY_DN79233_c0_g1|g.19427 TRINITY_DN79233_c0_g1_m.19427 type:complete len:165 (+) TRINITY_DN79233_c0_g1:222-716(+)	1	0.0116886	58.286	YLLFK(1)SNR	2	-1.0463	1
TRINITY_DN79262_c0_g1_m.19430	209	K	TRINITY_DN79262_c0_g1|g.19430 ORF TRINITY_DN79262_c0_g1|g.19430 TRINITY_DN79262_c0_g1_m.19430 type:complete len:525 (+) TRINITY_DN79262_c0_g1:278-1852(+)	1	0.00181419	46.206	NK(1)NIEHILILSGDHLYR	3	1.1633	1
TRINITY_DN79262_c0_g1_m.19430	483	K	TRINITY_DN79262_c0_g1|g.19430 ORF TRINITY_DN79262_c0_g1|g.19430 TRINITY_DN79262_c0_g1_m.19430 type:complete len:525 (+) TRINITY_DN79262_c0_g1:278-1852(+)	1	0.0454182	46.447	VGK(1)NVIIQNK	2	1.1967	1
TRINITY_DN79262_c0_g1_m.19430	490	K	TRINITY_DN79262_c0_g1|g.19430 ORF TRINITY_DN79262_c0_g1|g.19430 TRINITY_DN79262_c0_g1_m.19430 type:complete len:525 (+) TRINITY_DN79262_c0_g1:278-1852(+)	1	0.000666258	87.895	NVIIQNK(1)DGVR	2	-0.54386	1
TRINITY_DN79311_c0_g1_m.19445	152	K	TRINITY_DN79311_c0_g1|g.19445 ORF TRINITY_DN79311_c0_g1|g.19445 TRINITY_DN79311_c0_g1_m.19445 type:complete len:208 (+) TRINITY_DN79311_c0_g1:324-947(+)	1	0.0685519	56.014	TK(1)EGLGK	2	0.82467	1
TRINITY_DN79311_c0_g1_m.19445	194	K	TRINITY_DN79311_c0_g1|g.19445 ORF TRINITY_DN79311_c0_g1|g.19445 TRINITY_DN79311_c0_g1_m.19445 type:complete len:208 (+) TRINITY_DN79311_c0_g1:324-947(+)	1	5.91576e-05	78.043	DAVVGK(1)DDGAGDNK	2	0.10593	3
TRINITY_DN79311_c0_g1_m.19445	139	K	TRINITY_DN79311_c0_g1|g.19445 ORF TRINITY_DN79311_c0_g1|g.19445 TRINITY_DN79311_c0_g1_m.19445 type:complete len:208 (+) TRINITY_DN79311_c0_g1:324-947(+)	1	1.28122e-21	220.17	ESADSAWEK(1)TK	2	0.7709	1
TRINITY_DN79311_c0_g1_m.19445	94	K	TRINITY_DN79311_c0_g1|g.19445 ORF TRINITY_DN79311_c0_g1|g.19445 TRINITY_DN79311_c0_g1_m.19445 type:complete len:208 (+) TRINITY_DN79311_c0_g1:324-947(+)	1	0.0122483	50.834	AK(1)SAADWAK	2	0.1803	1
TRINITY_DN79311_c0_g1_m.19445	188	K	TRINITY_DN79311_c0_g1|g.19445 ORF TRINITY_DN79311_c0_g1|g.19445 TRINITY_DN79311_c0_g1_m.19445 type:complete len:208 (+) TRINITY_DN79311_c0_g1:324-947(+)	1	0.0339749	49.96	VK(1)DAVVGK	2	1.4598	1
TRINITY_DN79311_c0_g1_m.19445	202	K	TRINITY_DN79311_c0_g1|g.19445 ORF TRINITY_DN79311_c0_g1|g.19445 TRINITY_DN79311_c0_g1_m.19445 type:complete len:208 (+) TRINITY_DN79311_c0_g1:324-947(+)	1	6.5572e-05	125.17	DDGAGDNK(1)VHGK	2	0.27998	1
TRINITY_DN79311_c0_g1_m.19445	168	K	TRINITY_DN79311_c0_g1|g.19445 ORF TRINITY_DN79311_c0_g1|g.19445 TRINITY_DN79311_c0_g1_m.19445 type:complete len:208 (+) TRINITY_DN79311_c0_g1:324-947(+)	1	3.70115e-11	148.76	AAEVAENVGEK(1)AK	2	-1.4971	1
TRINITY_DN79311_c0_g1_m.19445	79	K	TRINITY_DN79311_c0_g1|g.19445 ORF TRINITY_DN79311_c0_g1|g.19445 TRINITY_DN79311_c0_g1_m.19445 type:complete len:208 (+) TRINITY_DN79311_c0_g1:324-947(+)	1	0.000684572	106.93	EGSESAK(1)ER	2	2.6162	1
TRINITY_DN79311_c0_g1_m.19445	174	K	TRINITY_DN79311_c0_g1|g.19445 ORF TRINITY_DN79311_c0_g1|g.19445 TRINITY_DN79311_c0_g1_m.19445 type:complete len:208 (+) TRINITY_DN79311_c0_g1:324-947(+)	1	8.85331e-13	150.85	ETVK(1)GVVGAANDTTQK	2	-3.8147	1
TRINITY_DN79311_c0_g1_m.19445	72	K	TRINITY_DN79311_c0_g1|g.19445 ORF TRINITY_DN79311_c0_g1|g.19445 TRINITY_DN79311_c0_g1_m.19445 type:complete len:208 (+) TRINITY_DN79311_c0_g1:324-947(+)	1	8.9076e-05	106	EVLK(1)EGSESAK	2	-0.54881	1
TRINITY_DN79311_c0_g1_m.19445	186	K	TRINITY_DN79311_c0_g1|g.19445 ORF TRINITY_DN79311_c0_g1|g.19445 TRINITY_DN79311_c0_g1_m.19445 type:complete len:208 (+) TRINITY_DN79311_c0_g1:324-947(+)	1	2.45507e-42	266.12	GVVGAANDTTQK(1)VK	2	-2.4819	1
TRINITY_DN79311_c0_g1_m.19445	141	K	TRINITY_DN79311_c0_g1|g.19445 ORF TRINITY_DN79311_c0_g1|g.19445 TRINITY_DN79311_c0_g1_m.19445 type:complete len:208 (+) TRINITY_DN79311_c0_g1:324-947(+)	1	0.000389135	129.28	TK(1)ESAESTK	2	1.8004	1
TRINITY_DN79311_c0_g1_m.19445	101	K	TRINITY_DN79311_c0_g1|g.19445 ORF TRINITY_DN79311_c0_g1|g.19445 TRINITY_DN79311_c0_g1_m.19445 type:complete len:208 (+) TRINITY_DN79311_c0_g1:324-947(+)	1	1.67343e-34	217.2	SAADWAK(1)DATNSASEK	2	-1.5771	1
TRINITY_DN79311_c0_g1_m.19445	148	K	TRINITY_DN79311_c0_g1|g.19445 ORF TRINITY_DN79311_c0_g1|g.19445 TRINITY_DN79311_c0_g1_m.19445 type:complete len:208 (+) TRINITY_DN79311_c0_g1:324-947(+)	1	0.00124861	90.761	ESAESTK(1)EK	2	0.95914	1
TRINITY_DN79311_c0_g1_m.19445	86	K	TRINITY_DN79311_c0_g1|g.19445 ORF TRINITY_DN79311_c0_g1|g.19445 TRINITY_DN79311_c0_g1_m.19445 type:complete len:208 (+) TRINITY_DN79311_c0_g1:324-947(+)	1	1.66034e-09	172.1	AGNVK(1)ETAEDR	2	1.0853	1
TRINITY_DN79311_c0_g1_m.19445	157	K	TRINITY_DN79311_c0_g1|g.19445 ORF TRINITY_DN79311_c0_g1|g.19445 TRINITY_DN79311_c0_g1_m.19445 type:complete len:208 (+) TRINITY_DN79311_c0_g1:324-947(+)	1	1.99564e-13	132.93	EGLGK(1)AAEVAENVGEK	2	-3.2882	1
TRINITY_DN79311_c0_g1_m.19445	126	K	TRINITY_DN79311_c0_g1|g.19445 ORF TRINITY_DN79311_c0_g1|g.19445 TRINITY_DN79311_c0_g1_m.19445 type:complete len:208 (+) TRINITY_DN79311_c0_g1:324-947(+)	1	0.00188807	103.8	ESAESAK(1)EK	2	0.41959	1
TRINITY_DN79311_c0_g1_m.19445	110	K	TRINITY_DN79311_c0_g1|g.19445 ORF TRINITY_DN79311_c0_g1|g.19445 TRINITY_DN79311_c0_g1_m.19445 type:complete len:208 (+) TRINITY_DN79311_c0_g1:324-947(+)	1	3.59217e-21	195.58	DATNSASEK(1)AR	2	0.62563	1
TRINITY_DN79678_c0_g1_m.19522	153	K	TRINITY_DN79678_c0_g1|g.19522 ORF TRINITY_DN79678_c0_g1|g.19522 TRINITY_DN79678_c0_g1_m.19522 type:complete len:197 (+) TRINITY_DN79678_c0_g1:162-752(+)	1	0.0740938	51.864	SPHVHK(1)DAR	2	0.050935	1
TRINITY_DN79779_c0_g1_m.19551	370	K	TRINITY_DN79779_c0_g1|g.19551 ORF TRINITY_DN79779_c0_g1|g.19551 TRINITY_DN79779_c0_g1_m.19551 type:5prime_partial len:454 (+) TRINITY_DN79779_c0_g1:3-1364(+)	1	4.40861e-21	207.88	NTINDEK(1)IGGK	2	-0.79631	1
TRINITY_DN79779_c0_g1_m.19551	339	K	TRINITY_DN79779_c0_g1|g.19551 ORF TRINITY_DN79779_c0_g1|g.19551 TRINITY_DN79779_c0_g1_m.19551 type:5prime_partial len:454 (+) TRINITY_DN79779_c0_g1:3-1364(+)	1	1.41269e-08	141.29	YK(1)TEDEEHK	2	0.59295	2
TRINITY_DN79779_c0_g1_m.19551	352	K	TRINITY_DN79779_c0_g1|g.19551 ORF TRINITY_DN79779_c0_g1|g.19551 TRINITY_DN79779_c0_g1_m.19551 type:5prime_partial len:454 (+) TRINITY_DN79779_c0_g1:3-1364(+)	1	2.77135e-06	106.47	VEAK(1)NALENYAYNMR	2	-1.6261	1
TRINITY_DN79779_c0_g1_m.19551	141	K	TRINITY_DN79779_c0_g1|g.19551 ORF TRINITY_DN79779_c0_g1|g.19551 TRINITY_DN79779_c0_g1_m.19551 type:5prime_partial len:454 (+) TRINITY_DN79779_c0_g1:3-1364(+)	1	3.08744e-06	108.41	MDK(1)NSVHDVVLVGGSTR	2	-4.815	2
TRINITY_DN79779_c0_g1_m.19551	374	K	TRINITY_DN79779_c0_g1|g.19551 ORF TRINITY_DN79779_c0_g1|g.19551 TRINITY_DN79779_c0_g1_m.19551 type:5prime_partial len:454 (+) TRINITY_DN79779_c0_g1:3-1364(+)	1	0.00605937	53.517	IGGK(1)LNPADK	2	-0.23419	1
TRINITY_DN79779_c0_g1_m.19551	346	K	TRINITY_DN79779_c0_g1|g.19551 ORF TRINITY_DN79779_c0_g1|g.19551 TRINITY_DN79779_c0_g1_m.19551 type:5prime_partial len:454 (+) TRINITY_DN79779_c0_g1:3-1364(+)	1	0.000785176	121.67	TEDEEHK(1)K	2	0.41511	1
TRINITY_DN79779_c0_g1_m.19551	410	K	TRINITY_DN79779_c0_g1|g.19551 ORF TRINITY_DN79779_c0_g1|g.19551 TRINITY_DN79779_c0_g1_m.19551 type:5prime_partial len:454 (+) TRINITY_DN79779_c0_g1:3-1364(+)	1	7.76539e-09	117.41	MK(1)ELESVCNPIIAK	2	-2.2907	2
TRINITY_DN79854_c0_g1_m.19563	119	K	TRINITY_DN79854_c0_g1|g.19563 ORF TRINITY_DN79854_c0_g1|g.19563 TRINITY_DN79854_c0_g1_m.19563 type:complete len:333 (+) TRINITY_DN79854_c0_g1:176-1174(+)	1	7.66174e-26	215.93	SQASALEK(1)HAAANCK	2	-3.8643	1
TRINITY_DN79854_c0_g1_m.19563	208	K	TRINITY_DN79854_c0_g1|g.19563 ORF TRINITY_DN79854_c0_g1|g.19563 TRINITY_DN79854_c0_g1_m.19563 type:complete len:333 (+) TRINITY_DN79854_c0_g1:176-1174(+)	1	2.80521e-05	111.39	TQDGEK(1)PVR	2	1.0513	1
TRINITY_DN79854_c0_g1_m.19563	111	K	TRINITY_DN79854_c0_g1|g.19563 ORF TRINITY_DN79854_c0_g1|g.19563 TRINITY_DN79854_c0_g1_m.19563 type:complete len:333 (+) TRINITY_DN79854_c0_g1:176-1174(+)	1	1.02652e-23	180.17	NVSIYK(1)SQASALEK	2	-2.5472	1
TRINITY_DN79854_c0_g1_m.19563	202	K	TRINITY_DN79854_c0_g1|g.19563 ORF TRINITY_DN79854_c0_g1|g.19563 TRINITY_DN79854_c0_g1_m.19563 type:complete len:333 (+) TRINITY_DN79854_c0_g1:176-1174(+)	0.999401	5.71656e-16	124.59	NVIIWGNHSSTQYPDVSHATVK(0.999)TQDGEK(0.001)PVR	4	-1.5368	1
TRINITY_DN79968_c0_g1_m.19578	263	K	TRINITY_DN79968_c0_g1|g.19578 ORF TRINITY_DN79968_c0_g1|g.19578 TRINITY_DN79968_c0_g1_m.19578 type:5prime_partial len:341 (+) TRINITY_DN79968_c0_g1:2-1024(+)	1	0.00165995	65.408	SLPTFSDK(1)LSGMLR	2	0.91775	1
TRINITY_DN79968_c0_g1_m.19578	96	K	TRINITY_DN79968_c0_g1|g.19578 ORF TRINITY_DN79968_c0_g1|g.19578 TRINITY_DN79968_c0_g1_m.19578 type:5prime_partial len:341 (+) TRINITY_DN79968_c0_g1:2-1024(+)	1	1.1017e-05	102.57	GEAALSK(1)IQSTTGNK	2	-2.1558	1
TRINITY_DN79968_c0_g1_m.19578	288	K	TRINITY_DN79968_c0_g1|g.19578 ORF TRINITY_DN79968_c0_g1|g.19578 TRINITY_DN79968_c0_g1_m.19578 type:5prime_partial len:341 (+) TRINITY_DN79968_c0_g1:2-1024(+)	1	0.00166201	51.454	EK(1)LVSGAFYFDR	2	-1.9683	1
TRINITY_DN80014_c0_g1_m.19585	169	K	TRINITY_DN80014_c0_g1|g.19585 ORF TRINITY_DN80014_c0_g1|g.19585 TRINITY_DN80014_c0_g1_m.19585 type:5prime_partial len:531 (+) TRINITY_DN80014_c0_g1:2-1594(+)	1	0.0615018	46.033	SLSK(1)DQEFQK	2	-1.0598	1
TRINITY_DN80368_c0_g1_m.19685	357	K	TRINITY_DN80368_c0_g1|g.19685 ORF TRINITY_DN80368_c0_g1|g.19685 TRINITY_DN80368_c0_g1_m.19685 type:complete len:498 (+) TRINITY_DN80368_c0_g1:74-1567(+)	1	0.0239979	61.494	YIEYGK(1)R	2	-0.24466	1
TRINITY_DN80368_c0_g1_m.19685	407	K	TRINITY_DN80368_c0_g1|g.19685 ORF TRINITY_DN80368_c0_g1|g.19685 TRINITY_DN80368_c0_g1_m.19685 type:complete len:498 (+) TRINITY_DN80368_c0_g1:74-1567(+)	1	0.00900676	74.849	FK(1)TIEEVIEK	2	2.0664	1
TRINITY_DN80370_c0_g1_m.19687	130	K	TRINITY_DN80370_c0_g1|g.19687 ORF TRINITY_DN80370_c0_g1|g.19687 TRINITY_DN80370_c0_g1_m.19687 type:complete len:410 (+) TRINITY_DN80370_c0_g1:168-1397(+)	1	0.0096003	58.338	QTILETK(1)DGGNTWFPR	2	2.3586	1
TRINITY_DN80410_c0_g1_m.19696	525	K	TRINITY_DN80410_c0_g1|g.19696 ORF TRINITY_DN80410_c0_g1|g.19696 TRINITY_DN80410_c0_g1_m.19696 type:5prime_partial len:626 (+) TRINITY_DN80410_c0_g1:3-1880(+)	1	0.000661652	90.308	GK(1)AYELLR	2	-0.41801	1
TRINITY_DN80427_c0_g1_m.19699	152	K	TRINITY_DN80427_c0_g1|g.19699 ORF TRINITY_DN80427_c0_g1|g.19699 TRINITY_DN80427_c0_g1_m.19699 type:complete len:206 (+) TRINITY_DN80427_c0_g1:199-816(+)	1	0.00778251	58.889	VLK(1)AMQLMTDNR	2	1.7766	1
TRINITY_DN80427_c0_g1_m.19699	130	K	TRINITY_DN80427_c0_g1|g.19699 ORF TRINITY_DN80427_c0_g1|g.19699 TRINITY_DN80427_c0_g1_m.19699 type:complete len:206 (+) TRINITY_DN80427_c0_g1:199-816(+)	1	0.00502802	65.408	STK(1)VGDIMTEENK	2	-3.6743	1
TRINITY_DN80427_c0_g1_m.19699	145	K	TRINITY_DN80427_c0_g1|g.19699 ORF TRINITY_DN80427_c0_g1|g.19699 TRINITY_DN80427_c0_g1_m.19699 type:complete len:206 (+) TRINITY_DN80427_c0_g1:199-816(+)	1	0.0101945	52.591	LITVK(1)PDTK	2	1.5438	1
TRINITY_DN80427_c0_g1_m.19699	63	K	TRINITY_DN80427_c0_g1|g.19699 ORF TRINITY_DN80427_c0_g1|g.19699 TRINITY_DN80427_c0_g1_m.19699 type:complete len:206 (+) TRINITY_DN80427_c0_g1:199-816(+)	1	1.57715e-14	158.59	LEEHGFESTTIADVLNAK(1)GK	3	-3.5156	1
TRINITY_DN80519_c0_g1_m.19711	6	K	TRINITY_DN80519_c0_g1|g.19711 ORF TRINITY_DN80519_c0_g1|g.19711 TRINITY_DN80519_c0_g1_m.19711 type:complete len:135 (+) TRINITY_DN80519_c0_g1:163-567(+)	1	1.4834e-05	79.235	AEDQK(1)SYHFDEVSK	2	-2.5086	1
TRINITY_DN80569_c0_g1_m.19724	350	K	TRINITY_DN80569_c0_g1|g.19724 ORF TRINITY_DN80569_c0_g1|g.19724 TRINITY_DN80569_c0_g1_m.19724 type:complete len:452 (+) TRINITY_DN80569_c0_g1:244-1599(+)	1	0.00126153	125.5	NINTLAK(1)R	2	-0.78653	1
TRINITY_DN80569_c0_g1_m.19724	267	K	TRINITY_DN80569_c0_g1|g.19724 ORF TRINITY_DN80569_c0_g1|g.19724 TRINITY_DN80569_c0_g1_m.19724 type:complete len:452 (+) TRINITY_DN80569_c0_g1:244-1599(+)	1	0.0100323	72.922	SDYK(1)DAFVDK	2	-0.34439	1
TRINITY_DN80569_c0_g1_m.19724	438	K	TRINITY_DN80569_c0_g1|g.19724 ORF TRINITY_DN80569_c0_g1|g.19724 TRINITY_DN80569_c0_g1_m.19724 type:complete len:452 (+) TRINITY_DN80569_c0_g1:244-1599(+)	1	0.00126608	114.39	IK(1)DVVEDPR	2	-0.19887	1
TRINITY_DN80569_c0_g1_m.19724	277	K	TRINITY_DN80569_c0_g1|g.19724 ORF TRINITY_DN80569_c0_g1|g.19724 TRINITY_DN80569_c0_g1_m.19724 type:complete len:452 (+) TRINITY_DN80569_c0_g1:244-1599(+)	1	0.0299829	70.806	HGTK(1)LGLMSGFVK	2	0.81958	1
TRINITY_DN80569_c0_g1_m.19724	172	K	TRINITY_DN80569_c0_g1|g.19724 ORF TRINITY_DN80569_c0_g1|g.19724 TRINITY_DN80569_c0_g1_m.19724 type:complete len:452 (+) TRINITY_DN80569_c0_g1:244-1599(+)	0.99607	0.00104317	85.081	LDQDTPK(0.004)PGAK(0.996)EADK	2	-2.2692	1
TRINITY_DN80569_c0_g1_m.19724	219	K	TRINITY_DN80569_c0_g1|g.19724 ORF TRINITY_DN80569_c0_g1|g.19724 TRINITY_DN80569_c0_g1_m.19724 type:complete len:452 (+) TRINITY_DN80569_c0_g1:244-1599(+)	1	3.66072e-05	76.255	LSASEPQLPPK(1)ER	2	-0.87135	1
TRINITY_DN80569_c0_g1_m.19724	178	K	TRINITY_DN80569_c0_g1|g.19724 ORF TRINITY_DN80569_c0_g1|g.19724 TRINITY_DN80569_c0_g1_m.19724 type:complete len:452 (+) TRINITY_DN80569_c0_g1:244-1599(+)	1	0.0615018	46.033	AK(1)PIVEEQIK	2	-1.3576	1
TRINITY_DN80569_c0_g1_m.19724	132	K	TRINITY_DN80569_c0_g1|g.19724 ORF TRINITY_DN80569_c0_g1|g.19724 TRINITY_DN80569_c0_g1_m.19724 type:complete len:452 (+) TRINITY_DN80569_c0_g1:244-1599(+)	1	4.68198e-18	156.02	FVAK(1)EGDTVTPGTK	2	-2.8671	1
TRINITY_DN80569_c0_g1_m.19724	196	K	TRINITY_DN80569_c0_g1|g.19724 ORF TRINITY_DN80569_c0_g1|g.19724 TRINITY_DN80569_c0_g1_m.19724 type:complete len:452 (+) TRINITY_DN80569_c0_g1:244-1599(+)	0.987968	0.00958017	59.67	IK(0.988)EK(0.012)PTVTSPAAPK	2	-2.0852	2
TRINITY_DN80574_c0_g1_m.19727	70	K	TRINITY_DN80574_c0_g1|g.19727 ORF TRINITY_DN80574_c0_g1|g.19727 TRINITY_DN80574_c0_g1_m.19727 type:complete len:199 (+) TRINITY_DN80574_c0_g1:115-711(+)	1	0.000390778	117.18	VMIK(1)TSCR	2	-0.54679	2
TRINITY_DN80640_c0_g1_m.19745	19	K	TRINITY_DN80640_c0_g1|g.19745 ORF TRINITY_DN80640_c0_g1|g.19745 TRINITY_DN80640_c0_g1_m.19745 type:complete len:103 (+) TRINITY_DN80640_c0_g1:261-569(+)	1	3.43545e-05	106	LHGGDQQK(1)EHEK	3	0.82861	1
TRINITY_DN80640_c0_g1_m.19745	44	K	TRINITY_DN80640_c0_g1|g.19745 ORF TRINITY_DN80640_c0_g1|g.19745 TRINITY_DN80640_c0_g1_m.19745 type:complete len:103 (+) TRINITY_DN80640_c0_g1:261-569(+)	1	2.85853e-15	145.08	EGEQHK(1)EGIVEK	2	-2.5204	1
TRINITY_DN80640_c0_g1_m.19745	62	K	TRINITY_DN80640_c0_g1|g.19745 ORF TRINITY_DN80640_c0_g1|g.19745 TRINITY_DN80640_c0_g1_m.19745 type:complete len:103 (+) TRINITY_DN80640_c0_g1:261-569(+)	1	0.00032061	83.214	IHGGEEDK(1)IHGGEK	3	0.072733	1
TRINITY_DN80640_c0_g1_m.19745	54	K	TRINITY_DN80640_c0_g1|g.19745 ORF TRINITY_DN80640_c0_g1|g.19745 TRINITY_DN80640_c0_g1_m.19745 type:complete len:103 (+) TRINITY_DN80640_c0_g1:261-569(+)	1	0.000370254	86.243	DK(1)IHGGEEDK	2	-0.26568	1
TRINITY_DN80648_c0_g1_m.19752	200	K	TRINITY_DN80648_c0_g1|g.19752 ORF TRINITY_DN80648_c0_g1|g.19752 TRINITY_DN80648_c0_g1_m.19752 type:complete len:296 (+) TRINITY_DN80648_c0_g1:159-1046(+)	1	0.0131707	67.507	FHYTHYDK(1)K	2	-0.84883	1
TRINITY_DN80648_c0_g1_m.19752	19	K	TRINITY_DN80648_c0_g1|g.19752 ORF TRINITY_DN80648_c0_g1|g.19752 TRINITY_DN80648_c0_g1_m.19752 type:complete len:296 (+) TRINITY_DN80648_c0_g1:159-1046(+)	1	9.47266e-05	68.548	ALHAGSWYTDNTK(1)K	2	-2.6741	1
TRINITY_DN80769_c0_g1_m.19767	28	K	TRINITY_DN80769_c0_g1|g.19767 ORF TRINITY_DN80769_c0_g1|g.19767 TRINITY_DN80769_c0_g1_m.19767 type:complete len:130 (+) TRINITY_DN80769_c0_g1:132-521(+)	1	0.00660523	62.88	IQVSNTK(1)K	2	1.4235	1
TRINITY_DN80769_c0_g1_m.19767	105	K	TRINITY_DN80769_c0_g1|g.19767 ORF TRINITY_DN80769_c0_g1|g.19767 TRINITY_DN80769_c0_g1_m.19767 type:complete len:130 (+) TRINITY_DN80769_c0_g1:132-521(+)	1	0.0132942	53.517	IEILLGK(1)SEK	2	-2.7545	1
TRINITY_DN80778_c0_g1_m.19768	163	K	TRINITY_DN80778_c0_g1|g.19768 ORF TRINITY_DN80778_c0_g1|g.19768 TRINITY_DN80778_c0_g1_m.19768 type:complete len:334 (+) TRINITY_DN80778_c0_g1:143-1144(+)	1	0.00387382	62.88	IGPLLMK(1)MQK	2	-1.7048	1
TRINITY_DN80778_c0_g1_m.19768	180	K	TRINITY_DN80778_c0_g1|g.19768 ORF TRINITY_DN80778_c0_g1|g.19768 TRINITY_DN80778_c0_g1_m.19768 type:complete len:334 (+) TRINITY_DN80778_c0_g1:143-1144(+)	1	0.00721385	67.887	PIDNTELTEK(1)EIIR	2	-3.5947	2
TRINITY_DN80778_c0_g1_m.19768	286	K	TRINITY_DN80778_c0_g1|g.19768 ORF TRINITY_DN80778_c0_g1|g.19768 TRINITY_DN80778_c0_g1_m.19768 type:complete len:334 (+) TRINITY_DN80778_c0_g1:143-1144(+)	1	0.0125973	75.243	AGYENFK(1)R	2	0.69311	1
TRINITY_DN80819_c0_g1_m.19782	27	K	TRINITY_DN80819_c0_g1|g.19782 ORF TRINITY_DN80819_c0_g1|g.19782 TRINITY_DN80819_c0_g1_m.19782 type:complete len:154 (+) TRINITY_DN80819_c0_g1:173-634(+)	1	6.31078e-21	172.92	TITLEVESSDTIDNVK(1)AK	2	-0.61017	1
TRINITY_DN80819_c0_g1_m.19782	6	K	TRINITY_DN80819_c0_g1|g.19782 ORF TRINITY_DN80819_c0_g1|g.19782 TRINITY_DN80819_c0_g1_m.19782 type:complete len:154 (+) TRINITY_DN80819_c0_g1:173-634(+)	1	1.853e-06	142.71	VK(1)TLTGK	2	2.241	3
TRINITY_DN80819_c0_g1_m.19782	124	K	TRINITY_DN80819_c0_g1|g.19782 ORF TRINITY_DN80819_c0_g1|g.19782 TRINITY_DN80819_c0_g1_m.19782 type:complete len:154 (+) TRINITY_DN80819_c0_g1:173-634(+)	1	0.0436724	57.293	LIYAGK(1)QLADDK	2	0.84823	1
TRINITY_DN80819_c0_g1_m.19782	33	K	TRINITY_DN80819_c0_g1|g.19782 ORF TRINITY_DN80819_c0_g1|g.19782 TRINITY_DN80819_c0_g1_m.19782 type:complete len:154 (+) TRINITY_DN80819_c0_g1:173-634(+)	1	0.000410318	105.94	IQDK(1)EGIPPDQQR	2	-1.9599	1
TRINITY_DN80819_c0_g1_m.19782	63	K	TRINITY_DN80819_c0_g1|g.19782 ORF TRINITY_DN80819_c0_g1|g.19782 TRINITY_DN80819_c0_g1_m.19782 type:complete len:154 (+) TRINITY_DN80819_c0_g1:173-634(+)	1	1.88974e-20	224.75	TLADYNIQK(1)ESTLHLVLR	3	-2.1676	1
TRINITY_DN80819_c0_g1_m.19782	48	K	TRINITY_DN80819_c0_g1|g.19782 ORF TRINITY_DN80819_c0_g1|g.19782 TRINITY_DN80819_c0_g1_m.19782 type:complete len:154 (+) TRINITY_DN80819_c0_g1:173-634(+)	1	9.69154e-11	175.64	LIFAGK(1)QLEDGR	2	5.3519	3
TRINITY_DN80879_c0_g1_m.19792	124	K	TRINITY_DN80879_c0_g1|g.19792 ORF TRINITY_DN80879_c0_g1|g.19792 TRINITY_DN80879_c0_g1_m.19792 type:complete len:395 (+) TRINITY_DN80879_c0_g1:100-1284(+)	1	0.00013517	68.127	NAVETALANSECYEQGK(1)SSDR	2	-0.95914	1
TRINITY_DN80879_c0_g1_m.19792	278	K	TRINITY_DN80879_c0_g1|g.19792 ORF TRINITY_DN80879_c0_g1|g.19792 TRINITY_DN80879_c0_g1_m.19792 type:complete len:395 (+) TRINITY_DN80879_c0_g1:100-1284(+)	1	0.00547862	56.378	AYNYIHK(1)YGHK	3	1.2074	1
TRINITY_DN80879_c0_g1_m.19792	338	K	TRINITY_DN80879_c0_g1|g.19792 ORF TRINITY_DN80879_c0_g1|g.19792 TRINITY_DN80879_c0_g1_m.19792 type:complete len:395 (+) TRINITY_DN80879_c0_g1:100-1284(+)	1	6.59974e-06	76.009	LTPSSAK(1)EYEFSDEELLK	2	0.72749	1
TRINITY_DN80879_c0_g1_m.19792	316	K	TRINITY_DN80879_c0_g1|g.19792 ORF TRINITY_DN80879_c0_g1|g.19792 TRINITY_DN80879_c0_g1_m.19792 type:complete len:395 (+) TRINITY_DN80879_c0_g1:100-1284(+)	1	1.55394e-34	170.22	ILQSLK(1)ESVTYPDEK	2	-2.5108	1
TRINITY_DN80915_c0_g1_m.19802	249	K	TRINITY_DN80915_c0_g1|g.19802 ORF TRINITY_DN80915_c0_g1|g.19802 TRINITY_DN80915_c0_g1_m.19802 type:complete len:314 (+) TRINITY_DN80915_c0_g1:119-1060(+)	1	0.00147182	61.577	NVK(1)AELVALYAK	2	2.0903	1
TRINITY_DN80915_c0_g1_m.19802	258	K	TRINITY_DN80915_c0_g1|g.19802 ORF TRINITY_DN80915_c0_g1|g.19802 TRINITY_DN80915_c0_g1_m.19802 type:complete len:314 (+) TRINITY_DN80915_c0_g1:119-1060(+)	1	0.000986298	64.906	AELVALYAK(1)HIGK	2	-0.99058	1
TRINITY_DN81010_c0_g1_m.19826	84	K	TRINITY_DN81010_c0_g1|g.19826 ORF TRINITY_DN81010_c0_g1|g.19826 TRINITY_DN81010_c0_g1_m.19826 type:5prime_partial len:394 (+) TRINITY_DN81010_c0_g1:2-1183(+)	1	0.0119645	75.243	LK(1)VPEGTR	2	0.6315	1
TRINITY_DN81010_c0_g1_m.19826	56	K	TRINITY_DN81010_c0_g1|g.19826 ORF TRINITY_DN81010_c0_g1|g.19826 TRINITY_DN81010_c0_g1_m.19826 type:5prime_partial len:394 (+) TRINITY_DN81010_c0_g1:2-1183(+)	1	0.00140874	90.761	QGEAAVENK(1)K	2	-1.1257	1
TRINITY_DN81010_c0_g1_m.19826	247	K	TRINITY_DN81010_c0_g1|g.19826 ORF TRINITY_DN81010_c0_g1|g.19826 TRINITY_DN81010_c0_g1_m.19826 type:5prime_partial len:394 (+) TRINITY_DN81010_c0_g1:2-1183(+)	1	1.27148e-05	136.06	DK(1)FGFDDAFNYK	2	3.1508	1
TRINITY_DN81026_c0_g4_m.19833	104	K	TRINITY_DN81026_c0_g4|g.19833 ORF TRINITY_DN81026_c0_g4|g.19833 TRINITY_DN81026_c0_g4_m.19833 type:complete len:125 (+) TRINITY_DN81026_c0_g4:149-523(+)	1	0.00407604	83.358	IK(1)GSLSAAQK	2	-0.48647	1
TRINITY_DN81026_c0_g4_m.19833	27	K	TRINITY_DN81026_c0_g4|g.19833 ORF TRINITY_DN81026_c0_g4|g.19833 TRINITY_DN81026_c0_g4_m.19833 type:complete len:125 (+) TRINITY_DN81026_c0_g4:149-523(+)	1	4.34516e-05	108.24	AHLATDAGK(1)DLTK	2	-0.87553	1
TRINITY_DN81026_c0_g4_m.19833	18	K	TRINITY_DN81026_c0_g4|g.19833 ORF TRINITY_DN81026_c0_g4|g.19833 TRINITY_DN81026_c0_g4_m.19833 type:complete len:125 (+) TRINITY_DN81026_c0_g4:149-523(+)	1	3.22165e-09	125.75	SAALLDQMK(1)AHLATDAGK	2	2.7537	1
TRINITY_DN81026_c0_g4_m.19833	9	K	TRINITY_DN81026_c0_g4|g.19833 ORF TRINITY_DN81026_c0_g4|g.19833 TRINITY_DN81026_c0_g4_m.19833 type:complete len:125 (+) TRINITY_DN81026_c0_g4:149-523(+)	1	3.88784e-08	100.69	PGILLK(1)SAALLDQMK	2	2.6032	1
TRINITY_DN81028_c0_g1_m.19834	11	K	TRINITY_DN81028_c0_g1|g.19834 ORF TRINITY_DN81028_c0_g1|g.19834 TRINITY_DN81028_c0_g1_m.19834 type:complete len:160 (+) TRINITY_DN81028_c0_g1:146-625(+)	1	2.73577e-06	84.58	SDEEHHFESK(1)ADAGASK	2	-2.7049	2
TRINITY_DN81028_c0_g1_m.19834	18	K	TRINITY_DN81028_c0_g1|g.19834 ORF TRINITY_DN81028_c0_g1|g.19834 TRINITY_DN81028_c0_g1_m.19834 type:complete len:160 (+) TRINITY_DN81028_c0_g1:146-625(+)	1	9.41987e-20	166.65	ADAGASK(1)TYPQQAGTIR	2	-1.2642	1
TRINITY_DN81109_c0_g1_m.19854	296	K	TRINITY_DN81109_c0_g1|g.19854 ORF TRINITY_DN81109_c0_g1|g.19854 TRINITY_DN81109_c0_g1_m.19854 type:complete len:322 (+) TRINITY_DN81109_c0_g1:124-1089(+)	1	0.00109412	64.906	IEQLPQYK(1)GCR	2	-1.3435	1
TRINITY_DN81280_c0_g1_m.19898	159	K	TRINITY_DN81280_c0_g1|g.19898 ORF TRINITY_DN81280_c0_g1|g.19898 TRINITY_DN81280_c0_g1_m.19898 type:5prime_partial len:294 (+) TRINITY_DN81280_c0_g1:2-883(+)	1	0.000533738	76.85	DTK(1)FIDTHSK	2	-2.8078	1
TRINITY_DN81280_c0_g1_m.19898	272	K	TRINITY_DN81280_c0_g1|g.19898 ORF TRINITY_DN81280_c0_g1|g.19898 TRINITY_DN81280_c0_g1_m.19898 type:5prime_partial len:294 (+) TRINITY_DN81280_c0_g1:2-883(+)	1	5.25185e-06	97.175	YYEGMTK(1)EQFAQMQK	2	-0.81095	1
TRINITY_DN81346_c0_g1_m.19921	246	K	TRINITY_DN81346_c0_g1|g.19921 ORF TRINITY_DN81346_c0_g1|g.19921 TRINITY_DN81346_c0_g1_m.19921 type:complete len:297 (+) TRINITY_DN81346_c0_g1:322-1212(+)	1	0.00173171	63.212	NPK(1)FSGSINAFK	2	2.1481	1
TRINITY_DN81346_c0_g1_m.19921	264	K	TRINITY_DN81346_c0_g1|g.19921 ORF TRINITY_DN81346_c0_g1|g.19921 TRINITY_DN81346_c0_g1_m.19921 type:complete len:297 (+) TRINITY_DN81346_c0_g1:322-1212(+)	1	3.66923e-07	85.622	IFATEGVK(1)GLYK	2	0.65672	1
TRINITY_DN81346_c0_g1_m.19921	54	K	TRINITY_DN81346_c0_g1|g.19921 ORF TRINITY_DN81346_c0_g1|g.19921 TRINITY_DN81346_c0_g1_m.19921 type:complete len:297 (+) TRINITY_DN81346_c0_g1:322-1212(+)	1	7.09711e-06	90.376	YSGAMDAVK(1)QTIAAEGAR	2	0.98692	1
TRINITY_DN81663_c0_g1_m.19994	104	K	TRINITY_DN81663_c0_g1|g.19994 ORF TRINITY_DN81663_c0_g1|g.19994 TRINITY_DN81663_c0_g1_m.19994 type:3prime_partial len:124 (+) TRINITY_DN81663_c0_g1:116-484(+)	1	0.000889293	63.212	SYLQDMLALVK(1)K	2	1.5878	2
TRINITY_DN81663_c0_g1_m.19994	77	K	TRINITY_DN81663_c0_g1|g.19994 ORF TRINITY_DN81663_c0_g1|g.19994 TRINITY_DN81663_c0_g1_m.19994 type:3prime_partial len:124 (+) TRINITY_DN81663_c0_g1:116-484(+)	1	2.4809e-06	92.593	ALDLSMK(1)HEYLSEEMQK	2	-0.61374	3
TRINITY_DN81693_c0_g1_m.20003	63	K	TRINITY_DN81693_c0_g1|g.20003 ORF TRINITY_DN81693_c0_g1|g.20003 TRINITY_DN81693_c0_g1_m.20003 type:complete len:122 (+) TRINITY_DN81693_c0_g1:71-436(+)	1	0.00352398	56.378	VNK(1)LIWSR	2	-1.3176	1
TRINITY_DN81693_c0_g1_m.20003	48	K	TRINITY_DN81693_c0_g1|g.20003 ORF TRINITY_DN81693_c0_g1|g.20003 TRINITY_DN81693_c0_g1_m.20003 type:complete len:122 (+) TRINITY_DN81693_c0_g1:71-436(+)	1	0.00137258	63.212	FAQK(1)AMGTTDVR	2	-1.7217	1
TRINITY_DN81727_c0_g1_m.20015	33	K	TRINITY_DN81727_c0_g1|g.20015 ORF TRINITY_DN81727_c0_g1|g.20015 TRINITY_DN81727_c0_g1_m.20015 type:complete len:107 (+) TRINITY_DN81727_c0_g1:104-424(+)	1	0.00653484	43.727	HHK(1)HEEHSGELGALGAGAFALHEK	4	0.78348	1
TRINITY_DN81727_c0_g1_m.20015	68	K	TRINITY_DN81727_c0_g1|g.20015 ORF TRINITY_DN81727_c0_g1|g.20015 TRINITY_DN81727_c0_g1_m.20015 type:complete len:107 (+) TRINITY_DN81727_c0_g1:104-424(+)	1	9.15572e-07	73.455	HK(1)IEEEIAAAAAVGAGGFAFHEHHEK	3	-3.0808	2
TRINITY_DN81727_c0_g1_m.20015	26	K	TRINITY_DN81727_c0_g1|g.20015 ORF TRINITY_DN81727_c0_g1|g.20015 TRINITY_DN81727_c0_g1_m.20015 type:complete len:107 (+) TRINITY_DN81727_c0_g1:104-424(+)	1	1.3412e-11	173.07	EEEQPSEIDYK(1)K	2	-1.6458	1
TRINITY_DN81727_c0_g1_m.20015	54	K	TRINITY_DN81727_c0_g1|g.20015 ORF TRINITY_DN81727_c0_g1|g.20015 TRINITY_DN81727_c0_g1_m.20015 type:complete len:107 (+) TRINITY_DN81727_c0_g1:104-424(+)	1	1.29194e-11	73.805	HEEHSGELGALGAGAFALHEK(1)HK	4	-1.8427	1
TRINITY_DN81786_c0_g1_m.20026	152	K	TRINITY_DN81786_c0_g1|g.20026 ORF TRINITY_DN81786_c0_g1|g.20026 TRINITY_DN81786_c0_g1_m.20026 type:complete len:174 (+) TRINITY_DN81786_c0_g1:77-598(+)	1	2.08837e-06	135.28	DVEK(1)VGSSSGR	2	0.51166	1
TRINITY_DN81786_c0_g1_m.20026	98	K	TRINITY_DN81786_c0_g1|g.20026 ORF TRINITY_DN81786_c0_g1|g.20026 TRINITY_DN81786_c0_g1_m.20026 type:complete len:174 (+) TRINITY_DN81786_c0_g1:77-598(+)	1	1.09201e-05	154.71	FADENFVK(1)K	2	0.41227	1
TRINITY_DN81786_c0_g1_m.20026	57	K	TRINITY_DN81786_c0_g1|g.20026 ORF TRINITY_DN81786_c0_g1|g.20026 TRINITY_DN81786_c0_g1_m.20026 type:complete len:174 (+) TRINITY_DN81786_c0_g1:77-598(+)	1	2.23018e-10	170.85	PLHFK(1)GSAFHR	3	-0.036859	3
TRINITY_DN81786_c0_g1_m.20026	45	K	TRINITY_DN81786_c0_g1|g.20026 ORF TRINITY_DN81786_c0_g1|g.20026 TRINITY_DN81786_c0_g1_m.20026 type:complete len:174 (+) TRINITY_DN81786_c0_g1:77-598(+)	1	0.0028322	81.335	ALCTGEK(1)GIGK	2	-1.2318	1
TRINITY_DN81786_c0_g1_m.20026	133	K	TRINITY_DN81786_c0_g1|g.20026 ORF TRINITY_DN81786_c0_g1|g.20026 TRINITY_DN81786_c0_g1_m.20026 type:complete len:174 (+) TRINITY_DN81786_c0_g1:77-598(+)	1	6.72961e-16	164.79	TSWLDGK(1)HVVFGQVVEGLNVVR	3	-0.8932	1
TRINITY_DN81844_c0_g1_m.20039	179	K	TRINITY_DN81844_c0_g1|g.20039 ORF TRINITY_DN81844_c0_g1|g.20039 TRINITY_DN81844_c0_g1_m.20039 type:complete len:245 (+) TRINITY_DN81844_c0_g1:81-815(+)	1	0.000192783	49.485	HK(1)IICIEDLIHEIFTVGPHFK	4	-0.5634	1
TRINITY_DN81844_c0_g1_m.20039	177	K	TRINITY_DN81844_c0_g1|g.20039 ORF TRINITY_DN81844_c0_g1|g.20039 TRINITY_DN81844_c0_g1_m.20039 type:complete len:245 (+) TRINITY_DN81844_c0_g1:81-815(+)	1	1.42784e-09	132.93	IPLTNNSIIEQGLGK(1)HK	3	-2.2141	1
TRINITY_DN81844_c0_g1_m.20039	7	K	TRINITY_DN81844_c0_g1|g.20039 ORF TRINITY_DN81844_c0_g1|g.20039 TRINITY_DN81844_c0_g1_m.20039 type:complete len:245 (+) TRINITY_DN81844_c0_g1:81-815(+)	1	0.000416149	58.338	AEVEAK(1)NVIPESVLK	2	2.2876	1
TRINITY_DN81844_c0_g1_m.20039	100	K	TRINITY_DN81844_c0_g1|g.20039 ORF TRINITY_DN81844_c0_g1|g.20039 TRINITY_DN81844_c0_g1_m.20039 type:complete len:245 (+) TRINITY_DN81844_c0_g1:81-815(+)	1	0.00142974	94.804	GINAMHPK(1)TK	2	0.54843	1
TRINITY_DN81844_c0_g1_m.20039	55	K	TRINITY_DN81844_c0_g1|g.20039 ORF TRINITY_DN81844_c0_g1|g.20039 TRINITY_DN81844_c0_g1_m.20039 type:complete len:245 (+) TRINITY_DN81844_c0_g1:81-815(+)	1	9.71993e-06	112.73	AEQYAK(1)EYENQEK	2	-2.0432	1
TRINITY_DN81849_c0_g1_m.20043	357	K	TRINITY_DN81849_c0_g1|g.20043 ORF TRINITY_DN81849_c0_g1|g.20043 TRINITY_DN81849_c0_g1_m.20043 type:complete len:412 (+) TRINITY_DN81849_c0_g1:173-1408(+)	1	0.00765227	43.272	LMK(1)IFPEIIR	2	-0.15811	1
TRINITY_DN81849_c0_g1_m.20043	222	K	TRINITY_DN81849_c0_g1|g.20043 ORF TRINITY_DN81849_c0_g1|g.20043 TRINITY_DN81849_c0_g1_m.20043 type:complete len:412 (+) TRINITY_DN81849_c0_g1:173-1408(+)	1	0.0118783	42.446	MEDNILEFFPTAK(1)R	2	1.0535	1
TRINITY_DN81880_c0_g1_m.20056	45	K	TRINITY_DN81880_c0_g1|g.20056 ORF TRINITY_DN81880_c0_g1|g.20056 TRINITY_DN81880_c0_g1_m.20056 type:5prime_partial len:202 (+) TRINITY_DN81880_c0_g1:2-607(+)	1	0.0636725	44.42	LLVK(1)LYR	2	-4.8107	1
TRINITY_DN81898_c0_g1_m.20063	7	K	TRINITY_DN81898_c0_g1|g.20063 ORF TRINITY_DN81898_c0_g1|g.20063 TRINITY_DN81898_c0_g1_m.20063 type:complete len:144 (+) TRINITY_DN81898_c0_g1:127-558(+)	1	1.66904e-06	99.34	EK(1)VSNISATAK	2	-0.90941	1
TRINITY_DN81898_c0_g1_m.20063	29	K	TRINITY_DN81898_c0_g1|g.20063 ORF TRINITY_DN81898_c0_g1|g.20063 TRINITY_DN81898_c0_g1_m.20063 type:complete len:144 (+) TRINITY_DN81898_c0_g1:127-558(+)	1	0.0202001	43.272	ATAEEK(1)VDK	2	1.347	1
TRINITY_DN81936_c0_g1_m.20073	79	K	TRINITY_DN81936_c0_g1|g.20073 ORF TRINITY_DN81936_c0_g1|g.20073 TRINITY_DN81936_c0_g1_m.20073 type:complete len:165 (+) TRINITY_DN81936_c0_g1:141-635(+)	1	0.018705	65.408	GGESIYGTK(1)FEDEIR	2	-2.0971	1
TRINITY_DN81995_c0_g1_m.20084	60	K	TRINITY_DN81995_c0_g1|g.20084 ORF TRINITY_DN81995_c0_g1|g.20084 TRINITY_DN81995_c0_g1_m.20084 type:complete len:231 (+) TRINITY_DN81995_c0_g1:212-904(+)	1	0.00314375	85.813	QK(1)QVEIR	2	-0.5162	1
TRINITY_DN81995_c0_g1_m.20084	98	K	TRINITY_DN81995_c0_g1|g.20084 ORF TRINITY_DN81995_c0_g1|g.20084 TRINITY_DN81995_c0_g1_m.20084 type:complete len:231 (+) TRINITY_DN81995_c0_g1:212-904(+)	1	0.000874619	73.305	EAAEK(1)ELLNVAHHHHTYR	3	1.8385	2
TRINITY_DN81995_c0_g1_m.20084	93	K	TRINITY_DN81995_c0_g1|g.20084 ORF TRINITY_DN81995_c0_g1|g.20084 TRINITY_DN81995_c0_g1_m.20084 type:complete len:231 (+) TRINITY_DN81995_c0_g1:212-904(+)	1	1.45493e-37	210.62	VLQAQDNLVNSMK(1)EAAEK	2	-3.733	2
TRINITY_DN81995_c0_g1_m.20084	80	K	TRINITY_DN81995_c0_g1|g.20084 ORF TRINITY_DN81995_c0_g1|g.20084 TRINITY_DN81995_c0_g1_m.20084 type:complete len:231 (+) TRINITY_DN81995_c0_g1:212-904(+)	1	1.92921e-18	190.37	IK(1)VLQAQDNLVNSMK	2	-5.1625	2
TRINITY_DN81995_c0_g1_m.20084	48	K	TRINITY_DN81995_c0_g1|g.20084 ORF TRINITY_DN81995_c0_g1|g.20084 TRINITY_DN81995_c0_g1_m.20084 type:complete len:231 (+) TRINITY_DN81995_c0_g1:212-904(+)	1	0.00182999	110.22	LQLVEAEK(1)R	2	-1.4338	1
TRINITY_DN81995_c0_g1_m.20084	126	K	TRINITY_DN81995_c0_g1|g.20084 ORF TRINITY_DN81995_c0_g1|g.20084 TRINITY_DN81995_c0_g1_m.20084 type:complete len:231 (+) TRINITY_DN81995_c0_g1:212-904(+)	1	0.000572105	99.305	LK(1)EPAVLLR	2	-1.2245	1
TRINITY_DN82028_c0_g2_m.20103	45	K	TRINITY_DN82028_c0_g2|g.20103 ORF TRINITY_DN82028_c0_g2|g.20103 TRINITY_DN82028_c0_g2_m.20103 type:complete len:153 (+) TRINITY_DN82028_c0_g2:135-593(+)	1	5.54388e-10	121.69	YANNSNYK(1)NDTMIR	2	-2.9642	1
TRINITY_DN82111_c0_g1_m.20118	237	K	TRINITY_DN82111_c0_g1|g.20118 ORF TRINITY_DN82111_c0_g1|g.20118 TRINITY_DN82111_c0_g1_m.20118 type:complete len:414 (+) TRINITY_DN82111_c0_g1:136-1377(+)	1	0.0143978	54.056	FMHK(1)PVR	2	0.56868	1
TRINITY_DN82111_c0_g1_m.20118	62	K	TRINITY_DN82111_c0_g1|g.20118 ORF TRINITY_DN82111_c0_g1|g.20118 TRINITY_DN82111_c0_g1_m.20118 type:complete len:414 (+) TRINITY_DN82111_c0_g1:136-1377(+)	1	8.87981e-09	124.06	GIYAYGFEK(1)PSAIQQR	2	-2.2461	1
TRINITY_DN82151_c0_g1_m.20122	564	K	TRINITY_DN82151_c0_g1|g.20122 ORF TRINITY_DN82151_c0_g1|g.20122 TRINITY_DN82151_c0_g1_m.20122 type:complete len:603 (+) TRINITY_DN82151_c0_g1:166-1974(+)	1	0.00427795	79.889	FSAADEPYIK(1)NSFK	2	2.0286	1
TRINITY_DN82151_c0_g1_m.20122	462	K	TRINITY_DN82151_c0_g1|g.20122 ORF TRINITY_DN82151_c0_g1|g.20122 TRINITY_DN82151_c0_g1_m.20122 type:complete len:603 (+) TRINITY_DN82151_c0_g1:166-1974(+)	1	3.37413e-08	123.92	FVFAGPSK(1)SAETIFR	2	2.2695	1
TRINITY_DN82151_c0_g1_m.20122	372	K	TRINITY_DN82151_c0_g1|g.20122 ORF TRINITY_DN82151_c0_g1|g.20122 TRINITY_DN82151_c0_g1_m.20122 type:complete len:603 (+) TRINITY_DN82151_c0_g1:166-1974(+)	1	0.000435916	81.642	IQFLEK(1)GIR	2	-1.0252	1
TRINITY_DN82151_c0_g1_m.20122	351	K	TRINITY_DN82151_c0_g1|g.20122 ORF TRINITY_DN82151_c0_g1|g.20122 TRINITY_DN82151_c0_g1_m.20122 type:complete len:603 (+) TRINITY_DN82151_c0_g1:166-1974(+)	1	2.20262e-05	113.34	DQELYAK(1)AFGDEEK	2	0.73366	1
TRINITY_DN82151_c0_g1_m.20122	585	K	TRINITY_DN82151_c0_g1|g.20122 ORF TRINITY_DN82151_c0_g1|g.20122 TRINITY_DN82151_c0_g1_m.20122 type:complete len:603 (+) TRINITY_DN82151_c0_g1:166-1974(+)	1	0.00158481	72.922	IILNIDNATTK(1)K	2	0.75755	1
TRINITY_DN82214_c0_g1_m.20144	134	K	TRINITY_DN82214_c0_g1|g.20144 ORF TRINITY_DN82214_c0_g1|g.20144 TRINITY_DN82214_c0_g1_m.20144 type:complete len:190 (+) TRINITY_DN82214_c0_g1:241-810(+)	1	8.44815e-05	125.98	TYEGK(1)LNCFK	2	0.40311	1
TRINITY_DN82214_c0_g1_m.20144	129	K	TRINITY_DN82214_c0_g1|g.20144 ORF TRINITY_DN82214_c0_g1|g.20144 TRINITY_DN82214_c0_g1_m.20144 type:complete len:190 (+) TRINITY_DN82214_c0_g1:241-810(+)	1	0.0203002	60.892	LSK(1)TYEGK	2	1.3932	1
TRINITY_DN82214_c0_g1_m.20144	126	K	TRINITY_DN82214_c0_g1|g.20144 ORF TRINITY_DN82214_c0_g1|g.20144 TRINITY_DN82214_c0_g1_m.20144 type:complete len:190 (+) TRINITY_DN82214_c0_g1:241-810(+)	1	0.00118172	97.277	MILPVIAK(1)LSK	2	1.6817	3
TRINITY_DN82380_c1_g2_m.20182	308	K	TRINITY_DN82380_c1_g2|g.20182 ORF TRINITY_DN82380_c1_g2|g.20182 TRINITY_DN82380_c1_g2_m.20182 type:internal len:384 (+) TRINITY_DN82380_c1_g2:2-1150(+)	1	9.08151e-07	85.742	SVGFPSGK(1)YLFAGIVDGR	2	2.0918	1
TRINITY_DN82380_c1_g2_m.20182	57	K	TRINITY_DN82380_c1_g2|g.20182 ORF TRINITY_DN82380_c1_g2|g.20182 TRINITY_DN82380_c1_g2_m.20182 type:internal len:384 (+) TRINITY_DN82380_c1_g2:2-1150(+)	1	8.79326e-12	112.7	STAEDLQK(1)VAANLR	2	1.221	1
TRINITY_DN82380_c1_g2_m.20182	157	K	TRINITY_DN82380_c1_g2|g.20182 ORF TRINITY_DN82380_c1_g2|g.20182 TRINITY_DN82380_c1_g2_m.20182 type:internal len:384 (+) TRINITY_DN82380_c1_g2:2-1150(+)	1	9.10796e-19	139.7	FSYASHK(1)AVSEYNEAK	2	-4.0953	3
TRINITY_DN82515_c0_g1_m.20219	165	K	TRINITY_DN82515_c0_g1|g.20219 ORF TRINITY_DN82515_c0_g1|g.20219 TRINITY_DN82515_c0_g1_m.20219 type:complete len:531 (+) TRINITY_DN82515_c0_g1:143-1735(+)	1	0.00925879	41.284	VVIEHGAVPIFVK(1)LLGSPSDDVR	3	0.35966	1
TRINITY_DN82515_c0_g1_m.20219	241	K	TRINITY_DN82515_c0_g1|g.20219 ORF TRINITY_DN82515_c0_g1|g.20219 TRINITY_DN82515_c0_g1_m.20219 type:complete len:531 (+) TRINITY_DN82515_c0_g1:143-1735(+)	0.999582	0.0281847	42.941	GKPQPNFEQTK(1)PALPALK	3	-1.1919	1
TRINITY_DN82515_c0_g1_m.20219	485	K	TRINITY_DN82515_c0_g1|g.20219 ORF TRINITY_DN82515_c0_g1|g.20219 TRINITY_DN82515_c0_g1_m.20219 type:complete len:531 (+) TRINITY_DN82515_c0_g1:143-1735(+)	1	0.000100526	69.224	IENLQSHDNTEIYEK(1)AVK	3	-0.13446	1
TRINITY_DN82666_c0_g1_m.20239	93	K	TRINITY_DN82666_c0_g1|g.20239 ORF TRINITY_DN82666_c0_g1|g.20239 TRINITY_DN82666_c0_g1_m.20239 type:complete len:164 (+) TRINITY_DN82666_c0_g1:155-646(+)	1	3.02415e-05	106.35	DATFEK(1)TNELSR	2	1.6629	1
TRINITY_DN82781_c0_g1_m.20269	29	K	TRINITY_DN82781_c0_g1|g.20269 ORF TRINITY_DN82781_c0_g1|g.20269 TRINITY_DN82781_c0_g1_m.20269 type:complete len:441 (+) TRINITY_DN82781_c0_g1:196-1518(+)	1	0.0241277	43.272	LAGDVAGTK(1)K	2	0.1711	1
TRINITY_DN82781_c0_g1_m.20269	435	K	TRINITY_DN82781_c0_g1|g.20269 ORF TRINITY_DN82781_c0_g1|g.20269 TRINITY_DN82781_c0_g1_m.20269 type:complete len:441 (+) TRINITY_DN82781_c0_g1:196-1518(+)	1	0.000213929	102.55	ETMVHK(1)AVLK	2	-1.1376	1
TRINITY_DN82781_c0_g1_m.20269	336	K	TRINITY_DN82781_c0_g1|g.20269 ORF TRINITY_DN82781_c0_g1|g.20269 TRINITY_DN82781_c0_g1_m.20269 type:complete len:441 (+) TRINITY_DN82781_c0_g1:196-1518(+)	1	0.0119645	56.014	AAEDLK(1)LR	2	0.81898	1
TRINITY_DN82929_c0_g1_m.20286	111	K	TRINITY_DN82929_c0_g1|g.20286 ORF TRINITY_DN82929_c0_g1|g.20286 TRINITY_DN82929_c0_g1_m.20286 type:3prime_partial len:292 (+) TRINITY_DN82929_c0_g1:196-1068(+)	1	0.0569621	54.056	EAGNIK(1)R	2	-0.35326	1
TRINITY_DN83046_c0_g1_m.20311	134	K	TRINITY_DN83046_c0_g1|g.20311 ORF TRINITY_DN83046_c0_g1|g.20311 TRINITY_DN83046_c0_g1_m.20311 type:complete len:227 (+) TRINITY_DN83046_c0_g1:188-868(+)	1	4.83422e-05	81.799	LYDLK(1)QQGFIER	2	-2.5483	1
TRINITY_DN83046_c0_g1_m.20311	178	K	TRINITY_DN83046_c0_g1|g.20311 ORF TRINITY_DN83046_c0_g1|g.20311 TRINITY_DN83046_c0_g1_m.20311 type:complete len:227 (+) TRINITY_DN83046_c0_g1:188-868(+)	1	3.86584e-07	132.44	TFEEADTK(1)HDGK	2	0.48519	1
TRINITY_DN83093_c0_g1_m.20330	59	K	TRINITY_DN83093_c0_g1|g.20330 ORF TRINITY_DN83093_c0_g1|g.20330 TRINITY_DN83093_c0_g1_m.20330 type:complete len:135 (+) TRINITY_DN83093_c0_g1:76-480(+)	1	2.1705e-08	117.45	LSLTDIK(1)IDIPR	2	2.5447	1
TRINITY_DN83093_c0_g1_m.20330	81	K	TRINITY_DN83093_c0_g1|g.20330 ORF TRINITY_DN83093_c0_g1|g.20330 TRINITY_DN83093_c0_g1_m.20330 type:complete len:135 (+) TRINITY_DN83093_c0_g1:76-480(+)	1	0.00606933	65.879	LIAAMDAADVK(1)NK	2	0.46444	1
TRINITY_DN83093_c0_g1_m.20330	109	K	TRINITY_DN83093_c0_g1|g.20330 ORF TRINITY_DN83093_c0_g1|g.20330 TRINITY_DN83093_c0_g1_m.20330 type:complete len:135 (+) TRINITY_DN83093_c0_g1:76-480(+)	1	0.0580727	49.058	FK(1)VMLAK	2	-3.1518	1
TRINITY_DN83093_c0_g1_m.20330	70	K	TRINITY_DN83093_c0_g1|g.20330 ORF TRINITY_DN83093_c0_g1|g.20330 TRINITY_DN83093_c0_g1_m.20330 type:complete len:135 (+) TRINITY_DN83093_c0_g1:76-480(+)	1	0.00743733	69.641	SK(1)LIAAMDAADVK	2	2.8087	1
TRINITY_DN83093_c0_g1_m.20330	19	K	TRINITY_DN83093_c0_g1|g.20330 ORF TRINITY_DN83093_c0_g1|g.20330 TRINITY_DN83093_c0_g1_m.20330 type:complete len:135 (+) TRINITY_DN83093_c0_g1:76-480(+)	1	3.95012e-05	103.87	VALVNYGK(1)EYGR	2	2.4114	1
TRINITY_DN83093_c0_g1_m.20330	51	K	TRINITY_DN83093_c0_g1|g.20330 ORF TRINITY_DN83093_c0_g1|g.20330 TRINITY_DN83093_c0_g1_m.20330 type:complete len:135 (+) TRINITY_DN83093_c0_g1:76-480(+)	1	0.0212643	54.056	GQMNFK(1)R	2	-0.25041	1
TRINITY_DN83139_c0_g1_m.20368	11	K	TRINITY_DN83139_c0_g1|g.20368 ORF TRINITY_DN83139_c0_g1|g.20368 TRINITY_DN83139_c0_g1_m.20368 type:complete len:149 (+) TRINITY_DN83139_c0_g1:185-631(+)	1	0.018634	82.716	ELK(1)DLQK	2	-0.42454	1
TRINITY_DN83139_c0_g1_m.20368	133	K	TRINITY_DN83139_c0_g1|g.20368 ORF TRINITY_DN83139_c0_g1|g.20368 TRINITY_DN83139_c0_g1_m.20368 type:complete len:149 (+) TRINITY_DN83139_c0_g1:185-631(+)	1	0.0172749	58.426	NK(1)YETTAR	2	-0.40464	1
TRINITY_DN83210_c0_g1_m.20393	185	K	TRINITY_DN83210_c0_g1|g.20393 ORF TRINITY_DN83210_c0_g1|g.20393 TRINITY_DN83210_c0_g1_m.20393 type:complete len:241 (+) TRINITY_DN83210_c0_g1:223-945(+)	1	0.0274306	49.058	ILQSK(1)DR	2	0.82413	1
TRINITY_DN83210_c0_g1_m.20393	141	K	TRINITY_DN83210_c0_g1|g.20393 ORF TRINITY_DN83210_c0_g1|g.20393 TRINITY_DN83210_c0_g1_m.20393 type:complete len:241 (+) TRINITY_DN83210_c0_g1:223-945(+)	1	0.00517738	87.251	TK(1)EMEDR	2	-0.22269	1
TRINITY_DN83210_c0_g1_m.20393	139	K	TRINITY_DN83210_c0_g1|g.20393 ORF TRINITY_DN83210_c0_g1|g.20393 TRINITY_DN83210_c0_g1_m.20393 type:complete len:241 (+) TRINITY_DN83210_c0_g1:223-945(+)	1	0.0384032	53.679	FAVVK(1)TK	2	-1.9987	1
TRINITY_DN83210_c0_g1_m.20393	175	K	TRINITY_DN83210_c0_g1|g.20393 ORF TRINITY_DN83210_c0_g1|g.20393 TRINITY_DN83210_c0_g1_m.20393 type:complete len:241 (+) TRINITY_DN83210_c0_g1:223-945(+)	1	0.00122641	65.879	MEGDLVLAK(1)ER	2	2.2524	1
TRINITY_DN83219_c0_g2_m.20398	99	K	TRINITY_DN83219_c0_g2|g.20398 ORF TRINITY_DN83219_c0_g2|g.20398 TRINITY_DN83219_c0_g2_m.20398 type:complete len:163 (+) TRINITY_DN83219_c0_g2:128-616(+)	1	5.73119e-12	144.2	HVK(1)FLADGSANYTK	2	-0.10977	2
TRINITY_DN83219_c0_g2_m.20398	90	K	TRINITY_DN83219_c0_g2|g.20398 ORF TRINITY_DN83219_c0_g2|g.20398 TRINITY_DN83219_c0_g2_m.20398 type:complete len:163 (+) TRINITY_DN83219_c0_g2:128-616(+)	1	6.95871e-18	183.27	AWAK(1)TYTDNK	2	1.1774	1
TRINITY_DN83219_c0_g2_m.20398	138	K	TRINITY_DN83219_c0_g2|g.20398 ORF TRINITY_DN83219_c0_g2|g.20398 TRINITY_DN83219_c0_g2_m.20398 type:complete len:163 (+) TRINITY_DN83219_c0_g2:128-616(+)	1	0.000118347	114.39	YAILVEDLK(1)VK	2	0.025863	1
TRINITY_DN83219_c0_g2_m.20398	96	K	TRINITY_DN83219_c0_g2|g.20398 ORF TRINITY_DN83219_c0_g2|g.20398 TRINITY_DN83219_c0_g2_m.20398 type:complete len:163 (+) TRINITY_DN83219_c0_g2:128-616(+)	1	1.23821e-08	197.66	TYTDNK(1)HVK	2	1.5568	1
TRINITY_DN83248_c0_g1_m.20411	132	K	TRINITY_DN83248_c0_g1|g.20411 ORF TRINITY_DN83248_c0_g1|g.20411 TRINITY_DN83248_c0_g1_m.20411 type:5prime_partial len:143 (+) TRINITY_DN83248_c0_g1:2-430(+)	1	1.895e-06	76.196	YTEVKPALTNLVAAAK(1)QLR	3	0.25391	2
TRINITY_DN83248_c0_g1_m.20411	121	K	TRINITY_DN83248_c0_g1|g.20411 ORF TRINITY_DN83248_c0_g1|g.20411 TRINITY_DN83248_c0_g1_m.20411 type:5prime_partial len:143 (+) TRINITY_DN83248_c0_g1:2-430(+)	0.986239	2.09429e-05	89.359	K(0.014)YTEVK(0.986)PALTNLVAAAK	3	-2.1726	1
TRINITY_DN83266_c0_g1_m.20420	152	K	TRINITY_DN83266_c0_g1|g.20420 ORF TRINITY_DN83266_c0_g1|g.20420 TRINITY_DN83266_c0_g1_m.20420 type:complete len:580 (+) TRINITY_DN83266_c0_g1:95-1834(+)	1	1.36558e-36	226.85	LGLLSVTSGANPVSVK(1)K	2	0.35625	1
TRINITY_DN83266_c0_g1_m.20420	274	K	TRINITY_DN83266_c0_g1|g.20420 ORF TRINITY_DN83266_c0_g1|g.20420 TRINITY_DN83266_c0_g1_m.20420 type:complete len:580 (+) TRINITY_DN83266_c0_g1:95-1834(+)	1	2.50346e-05	136.94	EIIPLLEK(1)TTQLR	2	0.66432	1
TRINITY_DN83266_c0_g1_m.20420	261	K	TRINITY_DN83266_c0_g1|g.20420 ORF TRINITY_DN83266_c0_g1|g.20420 TRINITY_DN83266_c0_g1_m.20420 type:complete len:580 (+) TRINITY_DN83266_c0_g1:95-1834(+)	1	4.90922e-07	129.69	VLVTDQK(1)ISTIK	2	3.9104	1
TRINITY_DN83266_c0_g1_m.20420	266	K	TRINITY_DN83266_c0_g1|g.20420 ORF TRINITY_DN83266_c0_g1|g.20420 TRINITY_DN83266_c0_g1_m.20420 type:complete len:580 (+) TRINITY_DN83266_c0_g1:95-1834(+)	1	3.67578e-11	147.02	ISTIK(1)EIIPLLEK	2	2.4874	1
TRINITY_DN83266_c0_g1_m.20420	115	K	TRINITY_DN83266_c0_g1|g.20420 ORF TRINITY_DN83266_c0_g1|g.20420 TRINITY_DN83266_c0_g1_m.20420 type:complete len:580 (+) TRINITY_DN83266_c0_g1:95-1834(+)	1	4.63866e-22	129.82	EVASK(1)TNDSAGDGTTTASVLAR	2	-2.1142	1
TRINITY_DN83266_c0_g1_m.20420	467	K	TRINITY_DN83266_c0_g1|g.20420 ORF TRINITY_DN83266_c0_g1|g.20420 TRINITY_DN83266_c0_g1_m.20420 type:complete len:580 (+) TRINITY_DN83266_c0_g1:95-1834(+)	1	0.000115195	114.39	DK(1)LEDADER	2	1.5207	1
TRINITY_DN83266_c0_g1_m.20420	254	K	TRINITY_DN83266_c0_g1|g.20420 ORF TRINITY_DN83266_c0_g1|g.20420 TRINITY_DN83266_c0_g1_m.20420 type:complete len:580 (+) TRINITY_DN83266_c0_g1:95-1834(+)	1	5.87109e-35	242.35	SVVEFDNAK(1)VLVTDQK	2	-1.9972	1
TRINITY_DN83266_c0_g1_m.20420	312	K	TRINITY_DN83266_c0_g1|g.20420 ORF TRINITY_DN83266_c0_g1|g.20420 TRINITY_DN83266_c0_g1_m.20420 type:complete len:580 (+) TRINITY_DN83266_c0_g1:95-1834(+)	1	5.49394e-07	85.813	GIINVAAIK(1)APGFGER	2	1.4058	1
TRINITY_DN83309_c0_g1_m.20443	221	K	TRINITY_DN83309_c0_g1|g.20443 ORF TRINITY_DN83309_c0_g1|g.20443 TRINITY_DN83309_c0_g1_m.20443 type:complete len:558 (+) TRINITY_DN83309_c0_g1:194-1867(+)	1	0.0595192	40.861	GVMFNK(1)DVVAPGK	2	7.6905	1
TRINITY_DN83309_c0_g1_m.20443	286	K	TRINITY_DN83309_c0_g1|g.20443 ORF TRINITY_DN83309_c0_g1|g.20443 TRINITY_DN83309_c0_g1_m.20443 type:complete len:558 (+) TRINITY_DN83309_c0_g1:194-1867(+)	1	0.0168118	50.297	FK(1)PDLVITEK	2	-2.3012	1
TRINITY_DN83309_c0_g1_m.20443	502	K	TRINITY_DN83309_c0_g1|g.20443 ORF TRINITY_DN83309_c0_g1|g.20443 TRINITY_DN83309_c0_g1_m.20443 type:complete len:558 (+) TRINITY_DN83309_c0_g1:194-1867(+)	1	9.42641e-23	156.14	IWDAYNVK(1)AQTFK	2	0.6479	1
TRINITY_DN83309_c0_g1_m.20443	9	K	TRINITY_DN83309_c0_g1|g.20443 ORF TRINITY_DN83309_c0_g1|g.20443 TRINITY_DN83309_c0_g1_m.20443 type:complete len:558 (+) TRINITY_DN83309_c0_g1:194-1867(+)	1	5.86615e-05	57.003	MHAPVLVLK(1)DSLK	2	1.2683	1
TRINITY_DN83309_c0_g1_m.20443	425	K	TRINITY_DN83309_c0_g1|g.20443 ORF TRINITY_DN83309_c0_g1|g.20443 TRINITY_DN83309_c0_g1_m.20443 type:complete len:558 (+) TRINITY_DN83309_c0_g1:194-1867(+)	1	2.92472e-10	172.1	QK(1)SSSIEGIEK	2	0.11925	1
TRINITY_DN83309_c0_g1_m.20443	212	K	TRINITY_DN83309_c0_g1|g.20443 ORF TRINITY_DN83309_c0_g1|g.20443 TRINITY_DN83309_c0_g1_m.20443 type:complete len:558 (+) TRINITY_DN83309_c0_g1:194-1867(+)	1	0.000461614	77.157	VPGGQLEDSK(1)VLK	2	-1.2131	1
TRINITY_DN83309_c0_g1_m.20443	507	K	TRINITY_DN83309_c0_g1|g.20443 ORF TRINITY_DN83309_c0_g1|g.20443 TRINITY_DN83309_c0_g1_m.20443 type:complete len:558 (+) TRINITY_DN83309_c0_g1:194-1867(+)	1	6.15625e-09	113.34	AQTFK(1)TAIEAASMLLR	2	2.1043	1
TRINITY_DN83309_c0_g1_m.20443	423	K	TRINITY_DN83309_c0_g1|g.20443 ORF TRINITY_DN83309_c0_g1|g.20443 TRINITY_DN83309_c0_g1_m.20443 type:complete len:558 (+) TRINITY_DN83309_c0_g1:194-1867(+)	1	0.0517825	42.495	LVPGGGATEMTVSAALK(1)QK	2	-5.5475	1
TRINITY_DN83379_c0_g1_m.20462	673	K	TRINITY_DN83379_c0_g1|g.20462 ORF TRINITY_DN83379_c0_g1|g.20462 TRINITY_DN83379_c0_g1_m.20462 type:complete len:865 (+) TRINITY_DN83379_c0_g1:161-2755(+)	1	0.0160094	43.306	AQK(1)EYEAAELK	2	-0.34188	1
TRINITY_DN83459_c0_g1_m.20478	182	K	TRINITY_DN83459_c0_g1|g.20478 ORF TRINITY_DN83459_c0_g1|g.20478 TRINITY_DN83459_c0_g1_m.20478 type:complete len:224 (+) TRINITY_DN83459_c0_g1:89-760(+)	1	0.0251251	72.355	LK(1)AGIFK	2	-3.105	1
TRINITY_DN83486_c0_g1_m.20488	104	K	TRINITY_DN83486_c0_g1|g.20488 ORF TRINITY_DN83486_c0_g1|g.20488 TRINITY_DN83486_c0_g1_m.20488 type:complete len:247 (+) TRINITY_DN83486_c0_g1:123-863(+)	1	1.78606e-05	72.327	FK(1)WGYEMPVDVLAK	2	2.9366	1
TRINITY_DN83486_c0_g1_m.20488	33	K	TRINITY_DN83486_c0_g1|g.20488 ORF TRINITY_DN83486_c0_g1|g.20488 TRINITY_DN83486_c0_g1_m.20488 type:complete len:247 (+) TRINITY_DN83486_c0_g1:123-863(+)	1	0.00218016	90.306	AVK(1)AAGVTSIGVR	2	-1.3083	1
TRINITY_DN83486_c0_g1_m.20488	181	K	TRINITY_DN83486_c0_g1|g.20488 ORF TRINITY_DN83486_c0_g1|g.20488 TRINITY_DN83486_c0_g1_m.20488 type:complete len:247 (+) TRINITY_DN83486_c0_g1:123-863(+)	1	0.000144557	110.88	EQEAINFLEK(1)K	2	4.4246	1
TRINITY_DN83486_c0_g1_m.20488	30	K	TRINITY_DN83486_c0_g1|g.20488 ORF TRINITY_DN83486_c0_g1|g.20488 TRINITY_DN83486_c0_g1_m.20488 type:complete len:247 (+) TRINITY_DN83486_c0_g1:123-863(+)	1	0.00168076	59.645	LYQVEYAFK(1)AVK	2	0.1976	1
TRINITY_DN83486_c0_g1_m.20488	171	K	TRINITY_DN83486_c0_g1|g.20488 ORF TRINITY_DN83486_c0_g1|g.20488 TRINITY_DN83486_c0_g1_m.20488 type:complete len:247 (+) TRINITY_DN83486_c0_g1:123-863(+)	1	1.18008e-19	135.89	ATSAGLK(1)EQEAINFLEK	2	14.221	2
TRINITY_DN83486_c0_g1_m.20488	153	K	TRINITY_DN83486_c0_g1|g.20488 ORF TRINITY_DN83486_c0_g1|g.20488 TRINITY_DN83486_c0_g1_m.20488 type:complete len:247 (+) TRINITY_DN83486_c0_g1:123-863(+)	1	0.00274938	50.641	GPQLFK(1)CDPAGHFFGHK	3	-2.9817	1
TRINITY_DN83486_c0_g1_m.20488	54	K	TRINITY_DN83486_c0_g1|g.20488 ORF TRINITY_DN83486_c0_g1|g.20488 TRINITY_DN83486_c0_g1_m.20488 type:complete len:247 (+) TRINITY_DN83486_c0_g1:123-863(+)	0.999999	0.00412221	62.705	GKDSVCVVTQK(1)K	2	0.0018681	1
TRINITY_DN83544_c0_g1_m.20500	32	K	TRINITY_DN83544_c0_g1|g.20500 ORF TRINITY_DN83544_c0_g1|g.20500 TRINITY_DN83544_c0_g1_m.20500 type:complete len:160 (+) TRINITY_DN83544_c0_g1:25-504(+)	1	1.45075e-05	122.44	DVSVK(1)HLGR	2	-0.27584	1
TRINITY_DN83544_c0_g1_m.20500	9	K	TRINITY_DN83544_c0_g1|g.20500 ORF TRINITY_DN83544_c0_g1|g.20500 TRINITY_DN83544_c0_g1_m.20500 type:complete len:160 (+) TRINITY_DN83544_c0_g1:25-504(+)	1	0.00499341	69.716	AK(1)GFVAEK	2	-0.22168	1
TRINITY_DN83544_c0_g1_m.20500	65	K	TRINITY_DN83544_c0_g1|g.20500 ORF TRINITY_DN83544_c0_g1|g.20500 TRINITY_DN83544_c0_g1_m.20500 type:complete len:160 (+) TRINITY_DN83544_c0_g1:25-504(+)	1	0.00789605	54.309	LPVCELTYTLK(1)SADR	2	1.4934	1
TRINITY_DN83544_c0_g1_m.20500	20	K	TRINITY_DN83544_c0_g1|g.20500 ORF TRINITY_DN83544_c0_g1|g.20500 TRINITY_DN83544_c0_g1_m.20500 type:complete len:160 (+) TRINITY_DN83544_c0_g1:25-504(+)	1	0.00147182	54.27	IAHVK(1)MPEASLK	2	-3.4869	1
TRINITY_DN83544_c0_g1_m.20500	143	K	TRINITY_DN83544_c0_g1|g.20500 ORF TRINITY_DN83544_c0_g1|g.20500 TRINITY_DN83544_c0_g1_m.20500 type:complete len:160 (+) TRINITY_DN83544_c0_g1:25-504(+)	1	0.00342683	81.48	GELK(1)LPSITDFFSR	2	-0.67372	1
[truncated: 3,090 more rows]

## Sheet: pep_quant
ID	Sequence	Length	Modifications	Modified sequence	Protein accession	Protein description	Charge	m/z	Mass error [ppm]	PEP	Score	MS/MS Count
[truncated: 16,007 more rows]

## Sheet: statistics
Peptide length	Number of peptides	Number of modification sites per protein	Number of proteins
[truncated: 37 more rows]
