# Supplementary material for: Qualitative Proteome-Wide Analysis Reveals the Diverse Functions of Lysine Crotonylation in Dendrobium huoshanense
Source: Front Plant Sci. 2022 Feb 16;13:822374. doi: 10.3389/fpls.2022.822374 (PMC8888884; doi:10.3389/fpls.2022.822374)
Supplement: Supplementary file 3 [file Table_2.XLSX]

## Sheet: GO
Category	Protein accession	Position	Amino acid	Protein description	Localization probability	PEP	Score	Modified sequence	Charge	Mass error [ppm]	MS/MS Count
cellular metabolic process	TRINITY_DN100000_c0_g1_m.1	103	K	TRINITY_DN100000_c0_g1|g.1 ORF TRINITY_DN100000_c0_g1|g.1 TRINITY_DN100000_c0_g1_m.1 type:complete len:446 (+) TRINITY_DN100000_c0_g1:98-1435(+)	1	0.00579866	74.486	SK(1)VDDLR	2	-0.16887	1
	TRINITY_DN100000_c0_g1_m.1	418	K	TRINITY_DN100000_c0_g1|g.1 ORF TRINITY_DN100000_c0_g1|g.1 TRINITY_DN100000_c0_g1_m.1 type:complete len:446 (+) TRINITY_DN100000_c0_g1:98-1435(+)	1	0.00658958	61.48	MK(1)VTQVDFK	2	0.87541	1
	TRINITY_DN100000_c0_g1_m.1	91	K	TRINITY_DN100000_c0_g1|g.1 ORF TRINITY_DN100000_c0_g1|g.1 TRINITY_DN100000_c0_g1_m.1 type:complete len:446 (+) TRINITY_DN100000_c0_g1:98-1435(+)	0.998407	0.00147268	46.068	LK(0.998)PHEDK(0.002)NEEDR	3	0.52218	1
	TRINITY_DN100000_c0_g1_m.1	425	K	TRINITY_DN100000_c0_g1|g.1 ORF TRINITY_DN100000_c0_g1|g.1 TRINITY_DN100000_c0_g1_m.1 type:complete len:446 (+) TRINITY_DN100000_c0_g1:98-1435(+)	1	0.02513	58.286	VTQVDFK(1)K	2	-1.1828	1
	TRINITY_DN100025_c1_g9_m.49	188	K	TRINITY_DN100025_c1_g9|g.49 ORF TRINITY_DN100025_c1_g9|g.49 TRINITY_DN100025_c1_g9_m.49 type:complete len:262 (+) TRINITY_DN100025_c1_g9:132-917(+)	1	0.00702904	87.251	AGNAYHK(1)YR	2	3.4349	1
	TRINITY_DN100046_c0_g1_m.79	124	K	TRINITY_DN100046_c0_g1|g.79 ORF TRINITY_DN100046_c0_g1|g.79 TRINITY_DN100046_c0_g1_m.79 type:complete len:1025 (+) TRINITY_DN100046_c0_g1:238-3312(+)	1	1.06133e-12	137.39	FDAGLTESQMTDHMK(1)R	3	-0.2686	2
	TRINITY_DN100046_c0_g1_m.79	778	K	TRINITY_DN100046_c0_g1|g.79 ORF TRINITY_DN100046_c0_g1|g.79 TRINITY_DN100046_c0_g1_m.79 type:complete len:1025 (+) TRINITY_DN100046_c0_g1:238-3312(+)	1	7.9052e-05	70.806	TFCIPHGGGGPGMGPIGVK(1)K	3	-3.9567	1
	TRINITY_DN100046_c0_g1_m.79	445	K	TRINITY_DN100046_c0_g1|g.79 ORF TRINITY_DN100046_c0_g1|g.79 TRINITY_DN100046_c0_g1_m.79 type:complete len:1025 (+) TRINITY_DN100046_c0_g1:238-3312(+)	1	0.000298977	62.398	LGTVDVQELPFFDTVK(1)VK	2	3.4869	1
	TRINITY_DN100046_c0_g1_m.79	363	K	TRINITY_DN100046_c0_g1|g.79 ORF TRINITY_DN100046_c0_g1|g.79 TRINITY_DN100046_c0_g1_m.79 type:complete len:1025 (+) TRINITY_DN100046_c0_g1:238-3312(+)	1	2.15481e-07	145.95	IIGVSLDSSGK(1)PALR	2	-1.9676	1
	TRINITY_DN100046_c0_g1_m.79	879	K	TRINITY_DN100046_c0_g1|g.79 ORF TRINITY_DN100046_c0_g1|g.79 TRINITY_DN100046_c0_g1_m.79 type:complete len:1025 (+) TRINITY_DN100046_c0_g1:238-3312(+)	1	1.57796e-06	108.91	GFK(1)QTAGIEAEDVAK	2	-3.3508	1
	TRINITY_DN100046_c0_g1_m.79	891	K	TRINITY_DN100046_c0_g1|g.79 ORF TRINITY_DN100046_c0_g1|g.79 TRINITY_DN100046_c0_g1_m.79 type:complete len:1025 (+) TRINITY_DN100046_c0_g1:238-3312(+)	1	4.21918e-16	176.97	QTAGIEAEDVAK(1)R	2	-3.1331	1
	TRINITY_DN100046_c0_g1_m.79	678	K	TRINITY_DN100046_c0_g1|g.79 ORF TRINITY_DN100046_c0_g1|g.79 TRINITY_DN100046_c0_g1_m.79 type:complete len:1025 (+) TRINITY_DN100046_c0_g1:238-3312(+)	1	6.88712e-14	120.75	IVSVGTDSK(1)GNINIEEVR	2	-2.2185	1
	TRINITY_DN100046_c0_g1_m.79	945	K	TRINITY_DN100046_c0_g1|g.79 ORF TRINITY_DN100046_c0_g1|g.79 TRINITY_DN100046_c0_g1_m.79 type:complete len:1025 (+) TRINITY_DN100046_c0_g1:238-3312(+)	1	4.29914e-08	126.48	EIENGK(1)ADINNNVLK	2	-1.0608	1
	TRINITY_DN100080_c0_g1_m.120	318	K	TRINITY_DN100080_c0_g1|g.120 ORF TRINITY_DN100080_c0_g1|g.120 TRINITY_DN100080_c0_g1_m.120 type:complete len:401 (+) TRINITY_DN100080_c0_g1:95-1297(+)	1	0.000146939	66.509	LCAQAAGLEAK(1)IIHYDPK	3	-0.67715	1
	TRINITY_DN100080_c0_g1_m.120	325	K	TRINITY_DN100080_c0_g1|g.120 ORF TRINITY_DN100080_c0_g1|g.120 TRINITY_DN100080_c0_g1_m.120 type:complete len:401 (+) TRINITY_DN100080_c0_g1:95-1297(+)	1	2.69076e-05	91.939	IIHYDPK(1)SVGVDAK	2	-1.9088	2
	TRINITY_DN100081_c0_g1_m.121	535	K	TRINITY_DN100081_c0_g1|g.121 ORF TRINITY_DN100081_c0_g1|g.121 TRINITY_DN100081_c0_g1_m.121 type:complete len:630 (+) TRINITY_DN100081_c0_g1:237-2126(+)	1	0.00219563	65.408	AWESFHDVK(1)ISDR	2	-2.2052	1
	TRINITY_DN100081_c0_g1_m.121	319	K	TRINITY_DN100081_c0_g1|g.121 ORF TRINITY_DN100081_c0_g1|g.121 TRINITY_DN100081_c0_g1_m.121 type:complete len:630 (+) TRINITY_DN100081_c0_g1:237-2126(+)	1	0.0180236	67.548	YAPTAK(1)DLASR	2	-1.9904	1
	TRINITY_DN100081_c0_g1_m.121	602	K	TRINITY_DN100081_c0_g1|g.121 ORF TRINITY_DN100081_c0_g1|g.121 TRINITY_DN100081_c0_g1_m.121 type:complete len:630 (+) TRINITY_DN100081_c0_g1:237-2126(+)	1	4.65104e-05	81.799	HSLGYWENEK(1)VR	2	-0.81129	1
	TRINITY_DN100081_c0_g1_m.121	526	K	TRINITY_DN100081_c0_g1|g.121 ORF TRINITY_DN100081_c0_g1|g.121 TRINITY_DN100081_c0_g1_m.121 type:complete len:630 (+) TRINITY_DN100081_c0_g1:237-2126(+)	1	0.000623401	89.382	LIDK(1)AWESFHDVK	2	-2.3045	1
	TRINITY_DN100081_c0_g1_m.121	234	K	TRINITY_DN100081_c0_g1|g.121 ORF TRINITY_DN100081_c0_g1|g.121 TRINITY_DN100081_c0_g1_m.121 type:complete len:630 (+) TRINITY_DN100081_c0_g1:237-2126(+)	1	0.00392377	83.474	FSAK(1)STILATGGYGR	2	-0.47171	1
	TRINITY_DN100081_c0_g1_m.121	165	K	TRINITY_DN100081_c0_g1|g.121 ORF TRINITY_DN100081_c0_g1|g.121 TRINITY_DN100081_c0_g1_m.121 type:complete len:630 (+) TRINITY_DN100081_c0_g1:237-2126(+)	1	2.01956e-06	85.813	AFGGQSLNFGK(1)GGQAYR	2	-2.6951	1
	TRINITY_DN100081_c0_g1_m.121	522	K	TRINITY_DN100081_c0_g1|g.121 ORF TRINITY_DN100081_c0_g1|g.121 TRINITY_DN100081_c0_g1_m.121 type:complete len:630 (+) TRINITY_DN100081_c0_g1:237-2126(+)	1	1.83717e-08	108.91	TQETLEEGCK(1)LIDK	2	-2.7643	1
	TRINITY_DN100081_c0_g1_m.121	150	K	TRINITY_DN100081_c0_g1|g.121 ORF TRINITY_DN100081_c0_g1|g.121 TRINITY_DN100081_c0_g1_m.121 type:complete len:630 (+) TRINITY_DN100081_c0_g1:237-2126(+)	1	0.000127346	117.39	TEDGK(1)IYQR	2	0.46053	1
	TRINITY_DN100123_c0_g1_m.199	131	K	TRINITY_DN100123_c0_g1|g.199 ORF TRINITY_DN100123_c0_g1|g.199 TRINITY_DN100123_c0_g1_m.199 type:complete len:441 (+) TRINITY_DN100123_c0_g1:258-1580(+)	1	0.000788531	104.39	EK(1)GAVTQIK	2	-0.33289	1
	TRINITY_DN100126_c0_g1_m.201	307	K	TRINITY_DN100126_c0_g1|g.201 ORF TRINITY_DN100126_c0_g1|g.201 TRINITY_DN100126_c0_g1_m.201 type:complete len:481 (+) TRINITY_DN100126_c0_g1:290-1732(+)	1	0.00234772	79.059	INDYQK(1)SR	2	2.1235	1
	TRINITY_DN100201_c1_g1_m.332	958	K	TRINITY_DN100201_c1_g1|g.332 ORF TRINITY_DN100201_c1_g1|g.332 TRINITY_DN100201_c1_g1_m.332 type:complete len:1806 (+) TRINITY_DN100201_c1_g1:162-5579(+)	1	0.00794218	57.888	SSQSSYHK(1)FR	2	-1.7311	1
	TRINITY_DN100242_c0_g1_m.405	248	K	TRINITY_DN100242_c0_g1|g.405 ORF TRINITY_DN100242_c0_g1|g.405 TRINITY_DN100242_c0_g1_m.405 type:complete len:269 (+) TRINITY_DN100242_c0_g1:89-895(+)	1	3.29085e-05	81.799	TISIVDNELAVK(1)R	2	3.4148	1
	TRINITY_DN100270_c1_g1_m.453	300	K	TRINITY_DN100270_c1_g1|g.453 ORF TRINITY_DN100270_c1_g1|g.453 TRINITY_DN100270_c1_g1_m.453 type:5prime_partial len:469 (+) TRINITY_DN100270_c1_g1:3-1409(+)	1	0.0101295	56.378	MAK(1)QAMER	2	0.93315	1
	TRINITY_DN100270_c1_g1_m.453	55	K	TRINITY_DN100270_c1_g1|g.453 ORF TRINITY_DN100270_c1_g1|g.453 TRINITY_DN100270_c1_g1_m.453 type:5prime_partial len:469 (+) TRINITY_DN100270_c1_g1:3-1409(+)	1	4.80171e-05	85.821	GEPPSVVALAK(1)WR	2	0.39167	1
	TRINITY_DN100408_c0_g1_m.709	178	K	TRINITY_DN100408_c0_g1|g.709 ORF TRINITY_DN100408_c0_g1|g.709 TRINITY_DN100408_c0_g1_m.709 type:complete len:540 (+) TRINITY_DN100408_c0_g1:151-1770(+)	1	0.0293371	40.386	LK(1)VEPLLDK	2	-0.36496	1
	TRINITY_DN100479_c0_g1_m.827	191	K	TRINITY_DN100479_c0_g1|g.827 ORF TRINITY_DN100479_c0_g1|g.827 TRINITY_DN100479_c0_g1_m.827 type:complete len:320 (+) TRINITY_DN100479_c0_g1:185-1144(+)	1	0.00287286	50.314	FLTYHEPAPILIPK(1)DK	3	-3.7271	1
	TRINITY_DN100479_c0_g1_m.827	7	K	TRINITY_DN100479_c0_g1|g.827 ORF TRINITY_DN100479_c0_g1|g.827 TRINITY_DN100479_c0_g1_m.827 type:complete len:320 (+) TRINITY_DN100479_c0_g1:185-1144(+)	1	4.51114e-08	121.67	MEIGTIK(1)HR	2	-1.2963	1
	TRINITY_DN100479_c0_g1_m.827	277	K	TRINITY_DN100479_c0_g1|g.827 ORF TRINITY_DN100479_c0_g1|g.827 TRINITY_DN100479_c0_g1_m.827 type:complete len:320 (+) TRINITY_DN100479_c0_g1:185-1144(+)	1	0.0011467	67.881	VQEYVQK(1)GGFK	2	-0.77739	1
	TRINITY_DN100479_c0_g1_m.827	223	K	TRINITY_DN100479_c0_g1|g.827 ORF TRINITY_DN100479_c0_g1|g.827 TRINITY_DN100479_c0_g1_m.827 type:complete len:320 (+) TRINITY_DN100479_c0_g1:185-1144(+)	1	0.0386173	46.068	FNK(1)SGFTGGLNYYR	2	1.6765	1
	TRINITY_DN100491_c0_g1_m.854	913	K	TRINITY_DN100491_c0_g1|g.854 ORF TRINITY_DN100491_c0_g1|g.854 TRINITY_DN100491_c0_g1_m.854 type:5prime_partial len:1083 (+) TRINITY_DN100491_c0_g1:3-3251(+)	1	5.03848e-05	90.142	IDPLGEGAK(1)WR	2	0.50284	1
	TRINITY_DN100491_c0_g1_m.854	446	K	TRINITY_DN100491_c0_g1|g.854 ORF TRINITY_DN100491_c0_g1|g.854 TRINITY_DN100491_c0_g1_m.854 type:5prime_partial len:1083 (+) TRINITY_DN100491_c0_g1:3-3251(+)	1	0.00431026	65.313	QLEFLK(1)GR	2	-1.294	1
	TRINITY_DN100491_c0_g1_m.854	372	K	TRINITY_DN100491_c0_g1|g.854 ORF TRINITY_DN100491_c0_g1|g.854 TRINITY_DN100491_c0_g1_m.854 type:5prime_partial len:1083 (+) TRINITY_DN100491_c0_g1:3-3251(+)	1	0.0109189	58.916	FIHYVNK(1)DGR	2	-2.0768	2
	TRINITY_DN100505_c0_g1_m.878	100	K	TRINITY_DN100505_c0_g1|g.878 ORF TRINITY_DN100505_c0_g1|g.878 TRINITY_DN100505_c0_g1_m.878 type:complete len:212 (+) TRINITY_DN100505_c0_g1:499-1134(+)	1	0.000639421	72.365	PLVSFEDVK(1)K	2	2.3784	1
	TRINITY_DN100581_c0_g1_m.1039	137	K	TRINITY_DN100581_c0_g1|g.1039 ORF TRINITY_DN100581_c0_g1|g.1039 TRINITY_DN100581_c0_g1_m.1039 type:5prime_partial len:520 (+) TRINITY_DN100581_c0_g1:1-1560(+)	1	0.0340276	45.489	IGSSWAVK(1)K	2	-1.0808	1
	TRINITY_DN100581_c0_g1_m.1039	145	K	TRINITY_DN100581_c0_g1|g.1039 ORF TRINITY_DN100581_c0_g1|g.1039 TRINITY_DN100581_c0_g1_m.1039 type:5prime_partial len:520 (+) TRINITY_DN100581_c0_g1:1-1560(+)	1	0.00632716	45.939	LVEIGK(1)QGVSR	2	0.99	1
	TRINITY_DN100581_c0_g1_m.1039	89	K	TRINITY_DN100581_c0_g1|g.1039 ORF TRINITY_DN100581_c0_g1|g.1039 TRINITY_DN100581_c0_g1_m.1039 type:5prime_partial len:520 (+) TRINITY_DN100581_c0_g1:1-1560(+)	1	0.0118606	62.88	WFLK(1)EEGR	2	-3.2956	1
	TRINITY_DN100616_c1_g1_m.1117	486	K	TRINITY_DN100616_c1_g1|g.1117 ORF TRINITY_DN100616_c1_g1|g.1117 TRINITY_DN100616_c1_g1_m.1117 type:5prime_partial len:518 (+) TRINITY_DN100616_c1_g1:3-1556(+)	1	4.77648e-05	88.181	VALLHLGK(1)LGAK	2	2.4471	2
	TRINITY_DN100616_c1_g1_m.1117	369	K	TRINITY_DN100616_c1_g1|g.1117 ORF TRINITY_DN100616_c1_g1|g.1117 TRINITY_DN100616_c1_g1_m.1117 type:5prime_partial len:518 (+) TRINITY_DN100616_c1_g1:3-1556(+)	1	0.000421153	88.181	DIIMVDHMK(1)K	2	0.47818	1
	TRINITY_DN100616_c1_g1_m.1117	307	K	TRINITY_DN100616_c1_g1|g.1117 ORF TRINITY_DN100616_c1_g1|g.1117 TRINITY_DN100616_c1_g1_m.1117 type:5prime_partial len:518 (+) TRINITY_DN100616_c1_g1:3-1556(+)	1	4.44404e-14	97.949	VAVVCGYGDVGK(1)GCAAALK	2	-1.76	1
	TRINITY_DN100616_c1_g1_m.1117	314	K	TRINITY_DN100616_c1_g1|g.1117 ORF TRINITY_DN100616_c1_g1|g.1117 TRINITY_DN100616_c1_g1_m.1117 type:5prime_partial len:518 (+) TRINITY_DN100616_c1_g1:3-1556(+)	1	7.28872e-07	83.438	GCAAALK(1)SAGAR	2	0.34892	1
	TRINITY_DN100616_c1_g1_m.1117	417	K	TRINITY_DN100616_c1_g1|g.1117 ORF TRINITY_DN100616_c1_g1|g.1117 TRINITY_DN100616_c1_g1_m.1117 type:5prime_partial len:518 (+) TRINITY_DN100616_c1_g1:3-1556(+)	1	0.00190365	62.454	WVFPDTNK(1)GIIVLAEGR	2	5.0615	1
	TRINITY_DN100616_c1_g1_m.1117	243	K	TRINITY_DN100616_c1_g1|g.1117 ORF TRINITY_DN100616_c1_g1|g.1117 TRINITY_DN100616_c1_g1_m.1117 type:5prime_partial len:518 (+) TRINITY_DN100616_c1_g1:3-1556(+)	1	7.05213e-25	244.74	LVGVSEETTTGVK(1)R	2	-0.43994	1
	TRINITY_DN100616_c1_g1_m.1117	191	K	TRINITY_DN100616_c1_g1|g.1117 ORF TRINITY_DN100616_c1_g1|g.1117 TRINITY_DN100616_c1_g1_m.1117 type:5prime_partial len:518 (+) TRINITY_DN100616_c1_g1:3-1556(+)	1	0.00188593	61.48	AEEEYEK(1)TGK	2	0.9549	1
	TRINITY_DN100616_c1_g1_m.1117	49	K	TRINITY_DN100616_c1_g1|g.1117 ORF TRINITY_DN100616_c1_g1|g.1117 TRINITY_DN100616_c1_g1_m.1117 type:5prime_partial len:518 (+) TRINITY_DN100616_c1_g1:3-1556(+)	1	0.000696467	106	VK(1)DMSQADFGR	2	0.5081	2
	TRINITY_DN100616_c1_g1_m.1117	493	K	TRINITY_DN100616_c1_g1|g.1117 ORF TRINITY_DN100616_c1_g1|g.1117 TRINITY_DN100616_c1_g1_m.1117 type:5prime_partial len:518 (+) TRINITY_DN100616_c1_g1:3-1556(+)	1	1.57328e-09	98.942	LTK(1)LSPAQAEYISVPVEGPYKPPHYR	4	1.134	1
	TRINITY_DN100616_c1_g1_m.1117	478	K	TRINITY_DN100616_c1_g1|g.1117 ORF TRINITY_DN100616_c1_g1|g.1117 TRINITY_DN100616_c1_g1_m.1117 type:5prime_partial len:518 (+) TRINITY_DN100616_c1_g1:3-1556(+)	1	2.17955e-05	115.04	HLDEK(1)VALLHLGK	2	-1.4027	2
	TRINITY_DN100616_c1_g1_m.1117	404	K	TRINITY_DN100616_c1_g1|g.1117 ORF TRINITY_DN100616_c1_g1|g.1117 TRINITY_DN100616_c1_g1_m.1117 type:5prime_partial len:518 (+) TRINITY_DN100616_c1_g1:3-1556(+)	1	0.00360836	79.059	ITIK(1)PQTDR	2	1.4666	1
	TRINITY_DN100616_c1_g1_m.1117	473	K	TRINITY_DN100616_c1_g1|g.1117 ORF TRINITY_DN100616_c1_g1|g.1117 TRINITY_DN100616_c1_g1_m.1117 type:5prime_partial len:518 (+) TRINITY_DN100616_c1_g1:3-1556(+)	1	8.30763e-07	141.29	VYVLPK(1)HLDEK	2	-0.46679	3
	TRINITY_DN100642_c1_g1_m.1168	203	K	TRINITY_DN100642_c1_g1|g.1168 ORF TRINITY_DN100642_c1_g1|g.1168 TRINITY_DN100642_c1_g1_m.1168 type:complete len:242 (+) TRINITY_DN100642_c1_g1:228-953(+)	1	0.0169449	60.709	IK(1)LSPWFR	2	-0.44716	1
	TRINITY_DN100642_c1_g1_m.1168	235	K	TRINITY_DN100642_c1_g1|g.1168 ORF TRINITY_DN100642_c1_g1|g.1168 TRINITY_DN100642_c1_g1_m.1168 type:complete len:242 (+) TRINITY_DN100642_c1_g1:228-953(+)	1	0.00285014	65.879	GTLHEAANMK(1)AIHK	3	2.3574	1
	TRINITY_DN100650_c4_g2_m.1181	188	K	TRINITY_DN100650_c4_g2|g.1181 ORF TRINITY_DN100650_c4_g2|g.1181 TRINITY_DN100650_c4_g2_m.1181 type:complete len:393 (+) TRINITY_DN100650_c4_g2:120-1298(+)	1	0.00397505	51.569	VHFATVANLK(1)DPLIAK	3	-4.317	1
	TRINITY_DN100650_c4_g2_m.1182	118	K	TRINITY_DN100650_c4_g2|g.1182 ORF TRINITY_DN100650_c4_g2|g.1182 TRINITY_DN100650_c4_g2_m.1182 type:complete len:137 (+) TRINITY_DN100650_c4_g2:1564-1974(+)	1	0.0202693	40.83	IPSGLSFDK(1)LEPEAHR	3	3.571	1
	TRINITY_DN100654_c2_g1_m.1189	128	K	TRINITY_DN100654_c2_g1|g.1189 ORF TRINITY_DN100654_c2_g1|g.1189 TRINITY_DN100654_c2_g1_m.1189 type:internal len:475 (-) TRINITY_DN100654_c2_g1:2-1423(-)	1	5.41138e-09	158.61	VK(1)QFLFNLLK	2	1.6929	1
	TRINITY_DN100699_c0_g1_m.1283	228	K	TRINITY_DN100699_c0_g1|g.1283 ORF TRINITY_DN100699_c0_g1|g.1283 TRINITY_DN100699_c0_g1_m.1283 type:complete len:796 (+) TRINITY_DN100699_c0_g1:329-2716(+)	1	4.32995e-05	83.474	NYPLAVK(1)LGTLSADLEK	2	2.8009	1
	TRINITY_DN100699_c0_g1_m.1283	338	K	TRINITY_DN100699_c0_g1|g.1283 ORF TRINITY_DN100699_c0_g1|g.1283 TRINITY_DN100699_c0_g1_m.1283 type:complete len:796 (+) TRINITY_DN100699_c0_g1:329-2716(+)	1	0.0171047	67.464	YYK(1)EQNLK	2	-0.60612	1
	TRINITY_DN100752_c1_g1_m.1377	439	K	TRINITY_DN100752_c1_g1|g.1377 ORF TRINITY_DN100752_c1_g1|g.1377 TRINITY_DN100752_c1_g1_m.1377 type:complete len:505 (+) TRINITY_DN100752_c1_g1:157-1671(+)	1	0.00699012	69.905	AK(1)LDDNAR	2	0.95618	1
	TRINITY_DN100752_c1_g1_m.1377	468	K	TRINITY_DN100752_c1_g1|g.1377 ORF TRINITY_DN100752_c1_g1|g.1377 TRINITY_DN100752_c1_g1_m.1377 type:complete len:505 (+) TRINITY_DN100752_c1_g1:157-1671(+)	1	0.000277206	85.821	MTK(1)DLALIVHGPK	2	-2.7262	1
	TRINITY_DN100752_c1_g1_m.1377	330	K	TRINITY_DN100752_c1_g1|g.1377 ORF TRINITY_DN100752_c1_g1|g.1377 TRINITY_DN100752_c1_g1_m.1377 type:complete len:505 (+) TRINITY_DN100752_c1_g1:157-1671(+)	1	0.00314666	73.891	WK(1)SQFDASGIWYEHR	3	-0.87065	1
	TRINITY_DN100752_c1_g1_m.1377	478	K	TRINITY_DN100752_c1_g1|g.1377 ORF TRINITY_DN100752_c1_g1|g.1377 TRINITY_DN100752_c1_g1_m.1377 type:complete len:505 (+) TRINITY_DN100752_c1_g1:157-1671(+)	1	0.0448362	48.701	DLALIVHGPK(1)VTR	2	0.68574	1
	TRINITY_DN100752_c1_g1_m.1377	297	K	TRINITY_DN100752_c1_g1|g.1377 ORF TRINITY_DN100752_c1_g1|g.1377 TRINITY_DN100752_c1_g1_m.1377 type:complete len:505 (+) TRINITY_DN100752_c1_g1:157-1671(+)	1	6.31959e-08	84.309	AFAESSMNTAYQK(1)K	2	-1.0534	1
	TRINITY_DN100763_c0_g1_m.1391	685	K	TRINITY_DN100763_c0_g1|g.1391 ORF TRINITY_DN100763_c0_g1|g.1391 TRINITY_DN100763_c0_g1_m.1391 type:complete len:980 (+) TRINITY_DN100763_c0_g1:104-3043(+)	1	0.00325952	67.464	MK(1)VVSLVR	2	-3.8658	1
	TRINITY_DN100763_c0_g1_m.1391	272	K	TRINITY_DN100763_c0_g1|g.1391 ORF TRINITY_DN100763_c0_g1|g.1391 TRINITY_DN100763_c0_g1_m.1391 type:complete len:980 (+) TRINITY_DN100763_c0_g1:104-3043(+)	1	0.0016008	64.064	K(1)HWIGGENIK	2	-0.089634	1
	TRINITY_DN100763_c0_g1_m.1391	605	K	TRINITY_DN100763_c0_g1|g.1391 ORF TRINITY_DN100763_c0_g1|g.1391 TRINITY_DN100763_c0_g1_m.1391 type:complete len:980 (+) TRINITY_DN100763_c0_g1:104-3043(+)	1	0.00146426	99.855	K(1)DVFNSFYR	2	1.3586	1
	TRINITY_DN100763_c0_g1_m.1391	412	K	TRINITY_DN100763_c0_g1|g.1391 ORF TRINITY_DN100763_c0_g1|g.1391 TRINITY_DN100763_c0_g1_m.1391 type:complete len:980 (+) TRINITY_DN100763_c0_g1:104-3043(+)	1	2.60357e-06	106.35	ILIDLK(1)GLSWK	2	0.127	1
	TRINITY_DN100763_c0_g1_m.1391	310	K	TRINITY_DN100763_c0_g1|g.1391 ORF TRINITY_DN100763_c0_g1|g.1391 TRINITY_DN100763_c0_g1_m.1391 type:complete len:980 (+) TRINITY_DN100763_c0_g1:104-3043(+)	1	0.00106977	69.327	VPAK(1)DFDLEAFNAGK	2	1.5319	1
	TRINITY_DN100763_c0_g1_m.1391	655	K	TRINITY_DN100763_c0_g1|g.1391 ORF TRINITY_DN100763_c0_g1|g.1391 TRINITY_DN100763_c0_g1_m.1391 type:complete len:980 (+) TRINITY_DN100763_c0_g1:104-3043(+)	0.997205	0.000134803	78.888	WIGTEDWVVK(0.997)TENLEELK(0.003)K	3	1.9569	1
	TRINITY_DN100763_c0_g1_m.1391	295	K	TRINITY_DN100763_c0_g1|g.1391 ORF TRINITY_DN100763_c0_g1|g.1391 TRINITY_DN100763_c0_g1_m.1391 type:complete len:980 (+) TRINITY_DN100763_c0_g1:104-3043(+)	1	0.032544	69.905	TK(1)TTLNLR	2	-0.79136	1
	TRINITY_DN100763_c0_g1_m.1391	762	K	TRINITY_DN100763_c0_g1|g.1391 ORF TRINITY_DN100763_c0_g1|g.1391 TRINITY_DN100763_c0_g1_m.1391 type:complete len:980 (+) TRINITY_DN100763_c0_g1:104-3043(+)	1	0.00214173	72.038	AFATYVQAK(1)R	2	-0.083118	1
	TRINITY_DN100763_c0_g1_m.1391	220	K	TRINITY_DN100763_c0_g1|g.1391 ORF TRINITY_DN100763_c0_g1|g.1391 TRINITY_DN100763_c0_g1_m.1391 type:complete len:980 (+) TRINITY_DN100763_c0_g1:104-3043(+)	1	2.13569e-10	148.76	YK(1)YGLFQQTITK	2	-0.76364	1
	TRINITY_DN100763_c0_g1_m.1391	956	K	TRINITY_DN100763_c0_g1|g.1391 ORF TRINITY_DN100763_c0_g1|g.1391 TRINITY_DN100763_c0_g1_m.1391 type:complete len:980 (+) TRINITY_DN100763_c0_g1:104-3043(+)	1	1.42265e-13	126.17	MSILNTAGSHK(1)FSSDR	3	-0.3167	3
	TRINITY_DN100763_c0_g1_m.1391	664	K	TRINITY_DN100763_c0_g1|g.1391 ORF TRINITY_DN100763_c0_g1|g.1391 TRINITY_DN100763_c0_g1_m.1391 type:complete len:980 (+) TRINITY_DN100763_c0_g1:104-3043(+)	1	0.000473587	72.327	K(1)HADNEDLHMEWR	3	-1.4354	1
	TRINITY_DN100763_c0_g1_m.1391	506	K	TRINITY_DN100763_c0_g1|g.1391 ORF TRINITY_DN100763_c0_g1|g.1391 TRINITY_DN100763_c0_g1_m.1391 type:complete len:980 (+) TRINITY_DN100763_c0_g1:104-3043(+)	1	0.00328683	55.782	ILDNVDFPDSVVELFNK(1)AK	2	2.7507	1
	TRINITY_DN100763_c0_g1_m.1391	321	K	TRINITY_DN100763_c0_g1|g.1391 ORF TRINITY_DN100763_c0_g1|g.1391 TRINITY_DN100763_c0_g1_m.1391 type:complete len:980 (+) TRINITY_DN100763_c0_g1:104-3043(+)	1	4.01969e-09	99.127	DFDLEAFNAGK(1)HNQANEAHANAEK	3	-1.3676	1
	TRINITY_DN100763_c0_g1_m.1391	293	K	TRINITY_DN100763_c0_g1|g.1391 ORF TRINITY_DN100763_c0_g1|g.1391 TRINITY_DN100763_c0_g1_m.1391 type:complete len:980 (+) TRINITY_DN100763_c0_g1:104-3043(+)	1	0.000142517	74.524	AIAYDVPIPGFK(1)TK	2	1.4338	1
	TRINITY_DN100763_c0_g1_m.1391	508	K	TRINITY_DN100763_c0_g1|g.1391 ORF TRINITY_DN100763_c0_g1|g.1391 TRINITY_DN100763_c0_g1_m.1391 type:complete len:980 (+) TRINITY_DN100763_c0_g1:104-3043(+)	1	0.000562159	129.72	AK(1)TISEVK	2	-0.83171	1
	TRINITY_DN100763_c0_g1_m.1391	732	K	TRINITY_DN100763_c0_g1|g.1391 ORF TRINITY_DN100763_c0_g1|g.1391 TRINITY_DN100763_c0_g1_m.1391 type:complete len:980 (+) TRINITY_DN100763_c0_g1:104-3043(+)	1	0.00727628	78.816	MK(1)EMSAQER	2	0.18663	1
	TRINITY_DN100853_c0_g1_m.1554	38	K	TRINITY_DN100853_c0_g1|g.1554 ORF TRINITY_DN100853_c0_g1|g.1554 TRINITY_DN100853_c0_g1_m.1554 type:complete len:426 (+) TRINITY_DN100853_c0_g1:290-1567(+)	1	0.00118941	52.201	LPSLPK(1)QLEGVVSHEK	3	0.49758	1
	TRINITY_DN100853_c0_g1_m.1554	231	K	TRINITY_DN100853_c0_g1|g.1554 ORF TRINITY_DN100853_c0_g1|g.1554 TRINITY_DN100853_c0_g1_m.1554 type:complete len:426 (+) TRINITY_DN100853_c0_g1:290-1567(+)	1	0.0241972	41.796	LAASLK(1)FPLK	2	-4.7477	1
	TRINITY_DN100950_c0_g1_m.1717	83	K	TRINITY_DN100950_c0_g1|g.1717 ORF TRINITY_DN100950_c0_g1|g.1717 TRINITY_DN100950_c0_g1_m.1717 type:complete len:303 (+) TRINITY_DN100950_c0_g1:172-1080(+)	1	2.23051e-06	97.084	AVLK(1)FAQYTGAHPIAGR	2	-4.1295	2
	TRINITY_DN100950_c0_g1_m.1717	51	K	TRINITY_DN100950_c0_g1|g.1717 ORF TRINITY_DN100950_c0_g1|g.1717 TRINITY_DN100950_c0_g1_m.1717 type:complete len:303 (+) TRINITY_DN100950_c0_g1:172-1080(+)	1	2.79964e-09	140.05	TWEK(1)IQLAAR	2	-1.8356	1
	TRINITY_DN100950_c0_g1_m.1717	188	K	TRINITY_DN100950_c0_g1|g.1717 ORF TRINITY_DN100950_c0_g1|g.1717 TRINITY_DN100950_c0_g1_m.1717 type:complete len:303 (+) TRINITY_DN100950_c0_g1:172-1080(+)	1	5.76447e-21	180.11	GTIAPGHK(1)WDVMVDLFFHR	3	1.3124	1
	TRINITY_DN100950_c0_g1_m.1717	160	K	TRINITY_DN100950_c0_g1|g.1717 ORF TRINITY_DN100950_c0_g1|g.1717 TRINITY_DN100950_c0_g1_m.1717 type:complete len:303 (+) TRINITY_DN100950_c0_g1:172-1080(+)	1	0.000889772	72.365	FVDIGIPANNK(1)GK	2	1.058	1
	TRINITY_DN100950_c0_g1_m.1717	47	K	TRINITY_DN100950_c0_g1|g.1717 ORF TRINITY_DN100950_c0_g1|g.1717 TRINITY_DN100950_c0_g1_m.1717 type:complete len:303 (+) TRINITY_DN100950_c0_g1:172-1080(+)	1	0.00387648	56.938	TDGIYIINLGK(1)TWEK	2	2.8251	1
	TRINITY_DN100960_c1_g4_m.1734	126	K	TRINITY_DN100960_c1_g4|g.1734 ORF TRINITY_DN100960_c1_g4|g.1734 TRINITY_DN100960_c1_g4_m.1734 type:complete len:278 (+) TRINITY_DN100960_c1_g4:295-1128(+)	1	8.93995e-05	99.276	NK(1)HNEVETEIIK	2	-3.2167	1
	TRINITY_DN100988_c0_g2_m.1794	359	K	TRINITY_DN100988_c0_g2|g.1794 ORF TRINITY_DN100988_c0_g2|g.1794 TRINITY_DN100988_c0_g2_m.1794 type:complete len:369 (+) TRINITY_DN100988_c0_g2:144-1250(+)	1	0.00305376	67.881	VELYK(1)GVPIK	2	0.71612	1
	TRINITY_DN100988_c0_g2_m.1794	320	K	TRINITY_DN100988_c0_g2|g.1794 ORF TRINITY_DN100988_c0_g2|g.1794 TRINITY_DN100988_c0_g2_m.1794 type:complete len:369 (+) TRINITY_DN100988_c0_g2:144-1250(+)	1	0.000394269	48.892	LQPGYVTAWNNMGDAYEK(1)K	2	-3.5681	1
	TRINITY_DN101011_c6_g1_m.1843	246	K	TRINITY_DN101011_c6_g1|g.1843 ORF TRINITY_DN101011_c6_g1|g.1843 TRINITY_DN101011_c6_g1_m.1843 type:5prime_partial len:431 (+) TRINITY_DN101011_c6_g1:1-1293(+)	1	7.92455e-05	106.11	FK(1)DIFQEVYESK	2	2.2042	1
	TRINITY_DN101011_c6_g1_m.1843	225	K	TRINITY_DN101011_c6_g1|g.1843 ORF TRINITY_DN101011_c6_g1|g.1843 TRINITY_DN101011_c6_g1_m.1843 type:5prime_partial len:431 (+) TRINITY_DN101011_c6_g1:1-1293(+)	1	4.48044e-09	127.03	AFADASMNTAFQK(1)K	2	-3.0733	2
	TRINITY_DN101011_c6_g1_m.1843	234	K	TRINITY_DN101011_c6_g1|g.1843 ORF TRINITY_DN101011_c6_g1|g.1843 TRINITY_DN101011_c6_g1_m.1843 type:5prime_partial len:431 (+) TRINITY_DN101011_c6_g1:1-1293(+)	1	0.00833605	52.863	WPLYLSTK(1)NTILK	2	1.7465	1
	TRINITY_DN101011_c6_g1_m.1843	139	K	TRINITY_DN101011_c6_g1|g.1843 ORF TRINITY_DN101011_c6_g1|g.1843 TRINITY_DN101011_c6_g1_m.1843 type:5prime_partial len:431 (+) TRINITY_DN101011_c6_g1:1-1293(+)	1	0.00141899	86.205	EPILCK(1)NVPR	2	1.9132	1
	TRINITY_DN101011_c6_g1_m.1843	396	K	TRINITY_DN101011_c6_g1|g.1843 ORF TRINITY_DN101011_c6_g1|g.1843 TRINITY_DN101011_c6_g1_m.1843 type:5prime_partial len:431 (+) TRINITY_DN101011_c6_g1:1-1293(+)	1	4.2913e-08	90.156	MTK(1)DLALIIHGSNLK	2	-0.81015	2
	TRINITY_DN101011_c6_g1_m.1843	79	K	TRINITY_DN101011_c6_g1|g.1843 ORF TRINITY_DN101011_c6_g1|g.1843 TRINITY_DN101011_c6_g1_m.1843 type:5prime_partial len:431 (+) TRINITY_DN101011_c6_g1:1-1293(+)	1	6.88208e-05	74.733	DSTDDK(1)VTVESAEATLK	2	-1.2098	1
	TRINITY_DN101011_c6_g1_m.1843	258	K	TRINITY_DN101011_c6_g1|g.1843 ORF TRINITY_DN101011_c6_g1|g.1843 TRINITY_DN101011_c6_g1_m.1843 type:5prime_partial len:431 (+) TRINITY_DN101011_c6_g1:1-1293(+)	1	8.26033e-09	168.43	WK(1)SLFEDSGIWYEHR	3	1.352	1
	TRINITY_DN101011_c6_g1_m.1843	408	K	TRINITY_DN101011_c6_g1|g.1843 ORF TRINITY_DN101011_c6_g1|g.1843 TRINITY_DN101011_c6_g1_m.1843 type:5prime_partial len:431 (+) TRINITY_DN101011_c6_g1:1-1293(+)	1	5.09493e-11	104.04	DLALIIHGSNLK(1)R	2	1.9761	1
	TRINITY_DN101011_c6_g1_m.1843	177	K	TRINITY_DN101011_c6_g1|g.1843 ORF TRINITY_DN101011_c6_g1|g.1843 TRINITY_DN101011_c6_g1_m.1843 type:5prime_partial len:431 (+) TRINITY_DN101011_c6_g1:1-1293(+)	1	0.0515963	43.734	LK(1)LVFEGK	2	-4.2562	1
	TRINITY_DN101011_c6_g1_m.1843	256	K	TRINITY_DN101011_c6_g1|g.1843 ORF TRINITY_DN101011_c6_g1|g.1843 TRINITY_DN101011_c6_g1_m.1843 type:5prime_partial len:431 (+) TRINITY_DN101011_c6_g1:1-1293(+)	1	0.000456904	57.293	DIFQEVYESK(1)WK	2	2.1778	1
	TRINITY_DN101011_c6_g1_m.1843	96	K	TRINITY_DN101011_c6_g1|g.1843 ORF TRINITY_DN101011_c6_g1|g.1843 TRINITY_DN101011_c6_g1_m.1843 type:5prime_partial len:431 (+) TRINITY_DN101011_c6_g1:1-1293(+)	1	0.0102049	58.338	YNVAIK(1)CATITPDEAR	2	-1.9693	1
	TRINITY_DN101011_c6_g1_m.1843	29	K	TRINITY_DN101011_c6_g1|g.1843 ORF TRINITY_DN101011_c6_g1|g.1843 TRINITY_DN101011_c6_g1_m.1843 type:5prime_partial len:431 (+) TRINITY_DN101011_c6_g1:1-1293(+)	1	4.60279e-09	99.909	IK(1)VTSPIVEMDGDEMTR	2	-0.95605	1
	TRINITY_DN101048_c1_g1_m.1917	328	K	TRINITY_DN101048_c1_g1|g.1917 ORF TRINITY_DN101048_c1_g1|g.1917 TRINITY_DN101048_c1_g1_m.1917 type:complete len:364 (+) TRINITY_DN101048_c1_g1:149-1240(+)	1	0.000523254	91.245	LESLK(1)LNSSDAALK	2	-0.57622	1
	TRINITY_DN101113_c0_g1_m.2042	355	K	TRINITY_DN101113_c0_g1|g.2042 ORF TRINITY_DN101113_c0_g1|g.2042 TRINITY_DN101113_c0_g1_m.2042 type:complete len:773 (+) TRINITY_DN101113_c0_g1:136-2454(+)	1	0.00158839	62.271	LYAVSTTSTSK(1)R	2	-0.77909	1
	TRINITY_DN101186_c1_g1_m.2184	182	K	TRINITY_DN101186_c1_g1|g.2184 ORF TRINITY_DN101186_c1_g1|g.2184 TRINITY_DN101186_c1_g1_m.2184 type:complete len:532 (+) TRINITY_DN101186_c1_g1:85-1680(+)	1	4.1982e-05	96.946	YK(1)VIILDEAHER	2	-3.7853	1
	TRINITY_DN101261_c2_g1_m.2346	140	K	TRINITY_DN101261_c2_g1|g.2346 ORF TRINITY_DN101261_c2_g1|g.2346 TRINITY_DN101261_c2_g1_m.2346 type:complete len:339 (+) TRINITY_DN101261_c2_g1:479-1495(+)	1	0.00754938	81.642	EISHQFK(1)VK	2	-1.3142	1
	TRINITY_DN101313_c4_g1_m.2434	198	K	TRINITY_DN101313_c4_g1|g.2434 ORF TRINITY_DN101313_c4_g1|g.2434 TRINITY_DN101313_c4_g1_m.2434 type:complete len:299 (+) TRINITY_DN101313_c4_g1:153-1049(+)	1	2.98777e-05	71.896	ANATISIVHSK(1)TK	2	-3.871	1
	TRINITY_DN101313_c4_g1_m.2434	31	K	TRINITY_DN101313_c4_g1|g.2434 ORF TRINITY_DN101313_c4_g1|g.2434 TRINITY_DN101313_c4_g1_m.2434 type:complete len:299 (+) TRINITY_DN101313_c4_g1:153-1049(+)	1	2.20875e-09	100.6	IK(1)DSTGIVPGLAVILVGSR	2	3.2472	1
	TRINITY_DN101354_c0_g2_m.2518	27	K	TRINITY_DN101354_c0_g2|g.2518 ORF TRINITY_DN101354_c0_g2|g.2518 TRINITY_DN101354_c0_g2_m.2518 type:complete len:307 (+) TRINITY_DN101354_c0_g2:138-1058(+)	1	0.00253295	68.108	HIVAASAK(1)LGHATFVLVR	3	0.5015	1
	TRINITY_DN101354_c0_g2_m.2518	234	K	TRINITY_DN101354_c0_g2|g.2518 ORF TRINITY_DN101354_c0_g2|g.2518 TRINITY_DN101354_c0_g2_m.2518 type:complete len:307 (+) TRINITY_DN101354_c0_g2:138-1058(+)	1	0.00838461	81.163	TGK(1)TLER	2	0.63218	2
	TRINITY_DN101354_c0_g2_m.2518	7	K	TRINITY_DN101354_c0_g2|g.2518 ORF TRINITY_DN101354_c0_g2|g.2518 TRINITY_DN101354_c0_g2_m.2518 type:complete len:307 (+) TRINITY_DN101354_c0_g2:138-1058(+)	1	0.00585624	55.604	SK(1)ILIIGGTGYIGK	2	1.3213	1
	TRINITY_DN101354_c0_g2_m.2518	107	K	TRINITY_DN101354_c0_g2|g.2518 ORF TRINITY_DN101354_c0_g2|g.2518 TRINITY_DN101354_c0_g2_m.2518 type:complete len:307 (+) TRINITY_DN101354_c0_g2:138-1058(+)	1	0.0068432	105.22	ETGNIK(1)R	2	0.27809	1
	TRINITY_DN101367_c0_g1_m.2542	1114	K	TRINITY_DN101367_c0_g1|g.2542 ORF TRINITY_DN101367_c0_g1|g.2542 TRINITY_DN101367_c0_g1_m.2542 type:complete len:1396 (+) TRINITY_DN101367_c0_g1:95-4282(+)	1	0.0413794	47.334	TIGSK(1)LEASLAR	2	0.26893	1
	TRINITY_DN101367_c0_g1_m.2542	168	K	TRINITY_DN101367_c0_g1|g.2542 ORF TRINITY_DN101367_c0_g1|g.2542 TRINITY_DN101367_c0_g1_m.2542 type:complete len:1396 (+) TRINITY_DN101367_c0_g1:95-4282(+)	1	0.0285717	45.489	LPSSK(1)LPR	2	-0.12336	1
	TRINITY_DN101367_c0_g1_m.2542	1153	K	TRINITY_DN101367_c0_g1|g.2542 ORF TRINITY_DN101367_c0_g1|g.2542 TRINITY_DN101367_c0_g1_m.2542 type:complete len:1396 (+) TRINITY_DN101367_c0_g1:95-4282(+)	1	0.00883232	55.782	SNLESSVVPAFEK(1)SSR	2	-3.6378	1
	TRINITY_DN101438_c0_g1_m.2694	540	K	TRINITY_DN101438_c0_g1|g.2694 ORF TRINITY_DN101438_c0_g1|g.2694 TRINITY_DN101438_c0_g1_m.2694 type:complete len:617 (+) TRINITY_DN101438_c0_g1:169-2019(+)	1	0.0113576	64.064	AAGEVLALQK(1)R	2	-2.4119	1
	TRINITY_DN101443_c1_g2_m.2706	138	K	TRINITY_DN101443_c1_g2|g.2706 ORF TRINITY_DN101443_c1_g2|g.2706 TRINITY_DN101443_c1_g2_m.2706 type:5prime_partial len:201 (+) TRINITY_DN101443_c1_g2:1-603(+)	1	0.00019415	80.128	NMGEILK(1)ASGASYSSVVK	2	-4.6229	1
	TRINITY_DN101450_c0_g1_m.2721	100	K	TRINITY_DN101450_c0_g1|g.2721 ORF TRINITY_DN101450_c0_g1|g.2721 TRINITY_DN101450_c0_g1_m.2721 type:complete len:393 (+) TRINITY_DN101450_c0_g1:186-1364(+)	1	3.10392e-17	185.9	AK(1)GEAFEEIVGLAR	2	1.7385	1
	TRINITY_DN101471_c1_g1_m.2763	505	K	TRINITY_DN101471_c1_g1|g.2763 ORF TRINITY_DN101471_c1_g1|g.2763 TRINITY_DN101471_c1_g1_m.2763 type:complete len:905 (+) TRINITY_DN101471_c1_g1:1572-4286(+)	1	0.0315907	63.908	QISTAVSGPVTK(1)EGR	2	3.0714	1
	TRINITY_DN101541_c4_g1_m.2910	272	K	TRINITY_DN101541_c4_g1|g.2910 ORF TRINITY_DN101541_c4_g1|g.2910 TRINITY_DN101541_c4_g1_m.2910 type:complete len:514 (+) TRINITY_DN101541_c4_g1:152-1693(+)	1	0.00605752	61.494	SYK(1)PNPR	2	1.6559	1
	TRINITY_DN101541_c4_g1_m.2910	413	K	TRINITY_DN101541_c4_g1|g.2910 ORF TRINITY_DN101541_c4_g1|g.2910 TRINITY_DN101541_c4_g1_m.2910 type:complete len:514 (+) TRINITY_DN101541_c4_g1:152-1693(+)	1	1.06608e-09	150.53	AALSDDYFVK(1)R	2	0.86355	1
	TRINITY_DN101541_c4_g1_m.2910	369	K	TRINITY_DN101541_c4_g1|g.2910 ORF TRINITY_DN101541_c4_g1|g.2910 TRINITY_DN101541_c4_g1_m.2910 type:complete len:514 (+) TRINITY_DN101541_c4_g1:152-1693(+)	1	0.0097329	74.486	VYK(1)NYDPR	2	-0.46196	1
	TRINITY_DN101541_c4_g1_m.2910	216	K	TRINITY_DN101541_c4_g1|g.2910 ORF TRINITY_DN101541_c4_g1|g.2910 TRINITY_DN101541_c4_g1_m.2910 type:complete len:514 (+) TRINITY_DN101541_c4_g1:152-1693(+)	1	0.000826909	94.66	GQDLYTSK(1)TVR	2	-0.88333	1
	TRINITY_DN101626_c2_g6_m.3096	234	K	TRINITY_DN101626_c2_g6|g.3096 ORF TRINITY_DN101626_c2_g6|g.3096 TRINITY_DN101626_c2_g6_m.3096 type:complete len:542 (+) TRINITY_DN101626_c2_g6:471-2096(+)	1	4.81987e-16	139.7	EHVQLAK(1)TLGVSK	2	-2.992	1
	TRINITY_DN101629_c1_g2_m.3102	549	K	TRINITY_DN101629_c1_g2|g.3102 ORF TRINITY_DN101629_c1_g2|g.3102 TRINITY_DN101629_c1_g2_m.3102 type:complete len:698 (+) TRINITY_DN101629_c1_g2:82-2175(+)	1	4.2913e-08	82.437	NIFK(1)LAQGEYIAPEK	2	-0.67201	1
	TRINITY_DN101629_c1_g2_m.3102	372	K	TRINITY_DN101629_c1_g2|g.3102 ORF TRINITY_DN101629_c1_g2|g.3102 TRINITY_DN101629_c1_g2_m.3102 type:complete len:698 (+) TRINITY_DN101629_c1_g2:82-2175(+)	1	0.0654158	43.734	TSGGLK(1)ER	2	-0.84325	1
	TRINITY_DN101643_c4_g1_m.3120	177	K	TRINITY_DN101643_c4_g1|g.3120 ORF TRINITY_DN101643_c4_g1|g.3120 TRINITY_DN101643_c4_g1_m.3120 type:complete len:253 (+) TRINITY_DN101643_c4_g1:286-1044(+)	1	0.000325031	80.623	IDSTYSQGSPAK(1)IR	2	-4.2909	1
	TRINITY_DN101648_c0_g1_m.3129	46	K	TRINITY_DN101648_c0_g1|g.3129 ORF TRINITY_DN101648_c0_g1|g.3129 TRINITY_DN101648_c0_g1_m.3129 type:complete len:152 (+) TRINITY_DN101648_c0_g1:80-535(+)	1	4.31702e-06	115.79	YKPETCSIQSHK(1)GDR	3	-1.2604	2
	TRINITY_DN101648_c0_g1_m.3129	36	K	TRINITY_DN101648_c0_g1|g.3129 ORF TRINITY_DN101648_c0_g1|g.3129 TRINITY_DN101648_c0_g1_m.3129 type:complete len:152 (+) TRINITY_DN101648_c0_g1:80-535(+)	1	0.000118839	88.24	YK(1)PETCSIQSHK	3	1.4945	2
	TRINITY_DN101648_c0_g1_m.3129	80	K	TRINITY_DN101648_c0_g1|g.3129 ORF TRINITY_DN101648_c0_g1|g.3129 TRINITY_DN101648_c0_g1_m.3129 type:complete len:152 (+) TRINITY_DN101648_c0_g1:80-535(+)	1	1.41192e-13	159.44	GDPIEFELGK(1)GQVIK	2	1.2992	1
	TRINITY_DN101790_c1_g1_m.3376	566	K	TRINITY_DN101790_c1_g1|g.3376 ORF TRINITY_DN101790_c1_g1|g.3376 TRINITY_DN101790_c1_g1_m.3376 type:complete len:673 (+) TRINITY_DN101790_c1_g1:160-2178(+)	1	0.018512	49.325	EK(1)AEAAAR	2	-0.31824	1
	TRINITY_DN101790_c1_g1_m.3376	585	K	TRINITY_DN101790_c1_g1|g.3376 ORF TRINITY_DN101790_c1_g1|g.3376 TRINITY_DN101790_c1_g1_m.3376 type:complete len:673 (+) TRINITY_DN101790_c1_g1:160-2178(+)	1	0.00606496	68.49	AEALAK(1)EEEER	2	-1.7971	1
	TRINITY_DN101818_c1_g1_m.3435	218	K	TRINITY_DN101818_c1_g1|g.3435 ORF TRINITY_DN101818_c1_g1|g.3435 TRINITY_DN101818_c1_g1_m.3435 type:complete len:542 (+) TRINITY_DN101818_c1_g1:130-1755(+)	1	0.0670945	40.502	YIK(1)ILGEALK	2	0.16525	1
	TRINITY_DN101874_c4_g1_m.3521	409	K	TRINITY_DN101874_c4_g1|g.3521 ORF TRINITY_DN101874_c4_g1|g.3521 TRINITY_DN101874_c4_g1_m.3521 type:complete len:432 (+) TRINITY_DN101874_c4_g1:243-1538(+)	1	0.00210255	85.622	IVANHEAYQK(1)R	2	-1.7699	1
	TRINITY_DN101894_c0_g1_m.3564	347	K	TRINITY_DN101894_c0_g1|g.3564 ORF TRINITY_DN101894_c0_g1|g.3564 TRINITY_DN101894_c0_g1_m.3564 type:complete len:464 (+) TRINITY_DN101894_c0_g1:295-1686(+)	1	0.000381916	88.42	TDRPFK(1)TSIVFAHDR	3	-0.72887	1
	TRINITY_DN101986_c0_g1_m.3723	119	K	TRINITY_DN101986_c0_g1|g.3723 ORF TRINITY_DN101986_c0_g1|g.3723 TRINITY_DN101986_c0_g1_m.3723 type:complete len:268 (+) TRINITY_DN101986_c0_g1:81-884(+)	1	0.000335447	115.86	VPVAK(1)LDDK	2	0.40346	1
	TRINITY_DN101986_c0_g1_m.3723	88	K	TRINITY_DN101986_c0_g1|g.3723 ORF TRINITY_DN101986_c0_g1|g.3723 TRINITY_DN101986_c0_g1_m.3723 type:complete len:268 (+) TRINITY_DN101986_c0_g1:81-884(+)	1	2.16175e-08	104.04	VLLTLEEK(1)NLPYDIK	2	3.108	1
	TRINITY_DN101986_c0_g1_m.3723	108	K	TRINITY_DN101986_c0_g1|g.3723 ORF TRINITY_DN101986_c0_g1|g.3723 TRINITY_DN101986_c0_g1_m.3723 type:complete len:268 (+) TRINITY_DN101986_c0_g1:81-884(+)	0.999956	7.72464e-07	81.409	LANLANKPEWFLK(1)ISPEGK	3	-1.5235	1
	TRINITY_DN101986_c0_g1_m.3723	249	K	TRINITY_DN101986_c0_g1|g.3723 ORF TRINITY_DN101986_c0_g1|g.3723 TRINITY_DN101986_c0_g1_m.3723 type:complete len:268 (+) TRINITY_DN101986_c0_g1:81-884(+)	1	9.3589e-13	187.82	ESFVK(1)TQALR	2	-1.1686	1
	TRINITY_DN101995_c0_g1_m.3740	24	K	TRINITY_DN101995_c0_g1|g.3740 ORF TRINITY_DN101995_c0_g1|g.3740 TRINITY_DN101995_c0_g1_m.3740 type:complete len:456 (+) TRINITY_DN101995_c0_g1:461-1828(+)	1	0.0183069	48.785	DNK(1)DLVAANIR	2	-1.0683	1
	TRINITY_DN102004_c0_g1_m.3758	204	K	TRINITY_DN102004_c0_g1|g.3758 ORF TRINITY_DN102004_c0_g1|g.3758 TRINITY_DN102004_c0_g1_m.3758 type:complete len:550 (+) TRINITY_DN102004_c0_g1:40-1689(+)	1	0.0466728	43.306	NSDELIDFK(1)EGR	2	3.9739	1
	TRINITY_DN102004_c0_g1_m.3758	424	K	TRINITY_DN102004_c0_g1|g.3758 ORF TRINITY_DN102004_c0_g1|g.3758 TRINITY_DN102004_c0_g1_m.3758 type:complete len:550 (+) TRINITY_DN102004_c0_g1:40-1689(+)	1	0.00173624	47.561	VQEQNK(1)TALR	2	0.63266	1
	TRINITY_DN102012_c1_g1_m.3775	172	K	TRINITY_DN102012_c1_g1|g.3775 ORF TRINITY_DN102012_c1_g1|g.3775 TRINITY_DN102012_c1_g1_m.3775 type:complete len:444 (+) TRINITY_DN102012_c1_g1:235-1566(+)	1	5.73583e-07	131.54	VVQK(1)QFHDVGGK	2	-1.6296	2
	TRINITY_DN102012_c1_g1_m.3775	180	K	TRINITY_DN102012_c1_g1|g.3775 ORF TRINITY_DN102012_c1_g1|g.3775 TRINITY_DN102012_c1_g1_m.3775 type:complete len:444 (+) TRINITY_DN102012_c1_g1:235-1566(+)	1	4.23979e-11	131.54	QFHDVGGK(1)AVEVK	2	-1.1276	2
	TRINITY_DN102019_c0_g1_m.3788	31	K	TRINITY_DN102019_c0_g1|g.3788 ORF TRINITY_DN102019_c0_g1|g.3788 TRINITY_DN102019_c0_g1_m.3788 type:complete len:219 (+) TRINITY_DN102019_c0_g1:600-1256(+)	1	0.00469691	88.24	NFSK(1)GLQEDER	2	1.1723	1
	TRINITY_DN102035_c0_g1_m.3833	209	K	TRINITY_DN102035_c0_g1|g.3833 ORF TRINITY_DN102035_c0_g1|g.3833 TRINITY_DN102035_c0_g1_m.3833 type:complete len:831 (+) TRINITY_DN102035_c0_g1:88-2580(+)	1	0.000577128	73.655	NPK(1)MLELASWLK	2	-0.85654	1
	TRINITY_DN102041_c0_g2_m.3846	67	K	TRINITY_DN102041_c0_g2|g.3846 ORF TRINITY_DN102041_c0_g2|g.3846 TRINITY_DN102041_c0_g2_m.3846 type:5prime_partial len:584 (+) TRINITY_DN102041_c0_g2:1-1752(+)	1	7.74431e-22	123.14	SSFK(1)IVDGPPSSAAGSPEEIAK	2	-3.1758	1
	TRINITY_DN102041_c0_g2_m.3846	63	K	TRINITY_DN102041_c0_g2|g.3846 ORF TRINITY_DN102041_c0_g2|g.3846 TRINITY_DN102041_c0_g2_m.3846 type:5prime_partial len:584 (+) TRINITY_DN102041_c0_g2:1-1752(+)	1	0.000109637	81.48	LNHPLPLPAVLK(1)SSFK	2	1.7143	2
	TRINITY_DN102041_c0_g2_m.3846	142	K	TRINITY_DN102041_c0_g2|g.3846 ORF TRINITY_DN102041_c0_g2|g.3846 TRINITY_DN102041_c0_g2_m.3846 type:5prime_partial len:584 (+) TRINITY_DN102041_c0_g2:1-1752(+)	1	0.00158074	83.623	AK(1)GSTLYGFR	2	-0.83158	1
	TRINITY_DN102041_c0_g2_m.3846	282	K	TRINITY_DN102041_c0_g2|g.3846 ORF TRINITY_DN102041_c0_g2|g.3846 TRINITY_DN102041_c0_g2_m.3846 type:5prime_partial len:584 (+) TRINITY_DN102041_c0_g2:1-1752(+)	1	0.000427271	98.009	STGK(1)YYHFVR	2	-1.3751	1
	TRINITY_DN102041_c0_g2_m.3846	424	K	TRINITY_DN102041_c0_g2|g.3846 ORF TRINITY_DN102041_c0_g2|g.3846 TRINITY_DN102041_c0_g2_m.3846 type:5prime_partial len:584 (+) TRINITY_DN102041_c0_g2:1-1752(+)	1	4.82026e-09	108.34	IETEK(1)MLISMVETELEK	2	3.7029	2
	TRINITY_DN102041_c0_g2_m.3846	249	K	TRINITY_DN102041_c0_g2|g.3846 ORF TRINITY_DN102041_c0_g2|g.3846 TRINITY_DN102041_c0_g2_m.3846 type:5prime_partial len:584 (+) TRINITY_DN102041_c0_g2:1-1752(+)	1	0.0503559	49.96	TIDGDLK(1)CK	2	-0.71824	1
	TRINITY_DN102041_c0_g2_m.3846	419	K	TRINITY_DN102041_c0_g2|g.3846 ORF TRINITY_DN102041_c0_g2|g.3846 TRINITY_DN102041_c0_g2_m.3846 type:5prime_partial len:584 (+) TRINITY_DN102041_c0_g2:1-1752(+)	1	7.55899e-13	172.09	DPHGNVQVAK(1)IETEK	2	-3.5043	2
	TRINITY_DN102041_c0_g2_m.3846	187	K	TRINITY_DN102041_c0_g2|g.3846 ORF TRINITY_DN102041_c0_g2|g.3846 TRINITY_DN102041_c0_g2_m.3846 type:5prime_partial len:584 (+) TRINITY_DN102041_c0_g2:1-1752(+)	1	0.0133575	72.042	DK(1)IETPEQFK	2	2.919	1
	TRINITY_DN102041_c0_g2_m.3846	195	K	TRINITY_DN102041_c0_g2|g.3846 ORF TRINITY_DN102041_c0_g2|g.3846 TRINITY_DN102041_c0_g2_m.3846 type:5prime_partial len:584 (+) TRINITY_DN102041_c0_g2:1-1752(+)	1	2.14145e-37	224.97	DKIETPEQFK(1)QAEETVLK	3	-2.2477	2
	TRINITY_DN102080_c1_g1_m.3928	124	K	TRINITY_DN102080_c1_g1|g.3928 ORF TRINITY_DN102080_c1_g1|g.3928 TRINITY_DN102080_c1_g1_m.3928 type:5prime_partial len:295 (+) TRINITY_DN102080_c1_g1:3-887(+)	1	4.18638e-05	81.799	SAHLK(1)ALEVAK	2	0.2599	2
	TRINITY_DN102080_c1_g1_m.3928	197	K	TRINITY_DN102080_c1_g1|g.3928 ORF TRINITY_DN102080_c1_g1|g.3928 TRINITY_DN102080_c1_g1_m.3928 type:5prime_partial len:295 (+) TRINITY_DN102080_c1_g1:3-887(+)	1	6.21943e-08	102.03	PSLK(1)LLLVTLGEK	2	0.15787	2
	TRINITY_DN102080_c1_g1_m.3928	274	K	TRINITY_DN102080_c1_g1|g.3928 ORF TRINITY_DN102080_c1_g1|g.3928 TRINITY_DN102080_c1_g1_m.3928 type:5prime_partial len:295 (+) TRINITY_DN102080_c1_g1:3-887(+)	1	6.25401e-23	163.59	FANACGAITTTK(1)K	2	-1.667	1
	TRINITY_DN102080_c1_g1_m.3928	104	K	TRINITY_DN102080_c1_g1|g.3928 ORF TRINITY_DN102080_c1_g1|g.3928 TRINITY_DN102080_c1_g1_m.3928 type:5prime_partial len:295 (+) TRINITY_DN102080_c1_g1:3-887(+)	1	8.3413e-07	104.49	AK(1)VFHYGSISLITEPCR	2	-2.0429	3
	TRINITY_DN102080_c1_g1_m.3928	213	K	TRINITY_DN102080_c1_g1|g.3928 ORF TRINITY_DN102080_c1_g1|g.3928 TRINITY_DN102080_c1_g1_m.3928 type:5prime_partial len:295 (+) TRINITY_DN102080_c1_g1:3-887(+)	1	0.0116757	78.178	YYTK(1)DFR	2	-0.7526	1
	TRINITY_DN102080_c1_g1_m.3928	209	K	TRINITY_DN102080_c1_g1|g.3928 ORF TRINITY_DN102080_c1_g1|g.3928 TRINITY_DN102080_c1_g1_m.3928 type:5prime_partial len:295 (+) TRINITY_DN102080_c1_g1:3-887(+)	1	0.0616222	41.025	GCK(1)YYTK	2	0.88601	1
	TRINITY_DN102080_c1_g1_m.3928	31	K	TRINITY_DN102080_c1_g1|g.3928 ORF TRINITY_DN102080_c1_g1|g.3928 TRINITY_DN102080_c1_g1_m.3928 type:5prime_partial len:295 (+) TRINITY_DN102080_c1_g1:3-887(+)	1	0.000664971	87.573	AAFMGK(1)LGDDEFGR	2	1.0373	2
	TRINITY_DN102080_c1_g1_m.3928	223	K	TRINITY_DN102080_c1_g1|g.3928 ORF TRINITY_DN102080_c1_g1|g.3928 TRINITY_DN102080_c1_g1_m.3928 type:5prime_partial len:295 (+) TRINITY_DN102080_c1_g1:3-887(+)	1	0.0502527	54.143	GAVDAFK(1)VSQIDTTGAGDAFVGALLTK	3	4.989	1
	TRINITY_DN102133_c3_g1_m.4029	92	K	TRINITY_DN102133_c3_g1|g.4029 ORF TRINITY_DN102133_c3_g1|g.4029 TRINITY_DN102133_c3_g1_m.4029 type:5prime_partial len:100 (+) TRINITY_DN102133_c3_g1:1-300(+)	0.999539	0.0365546	45.939	AKPYK(1)DHPTILR	3	-1.0847	1
	TRINITY_DN102135_c0_g1_m.4034	228	K	TRINITY_DN102135_c0_g1|g.4034 ORF TRINITY_DN102135_c0_g1|g.4034 TRINITY_DN102135_c0_g1_m.4034 type:5prime_partial len:1138 (+) TRINITY_DN102135_c0_g1:3-3416(+)	1	0.0167418	46.447	IAEFK(1)DPNR	2	1.5672	1
	TRINITY_DN102135_c0_g1_m.4034	767	K	TRINITY_DN102135_c0_g1|g.4034 ORF TRINITY_DN102135_c0_g1|g.4034 TRINITY_DN102135_c0_g1_m.4034 type:5prime_partial len:1138 (+) TRINITY_DN102135_c0_g1:3-3416(+)	1	0.00997627	72.492	MSK(1)STGNFR	2	0.37926	1
	TRINITY_DN102224_c0_g1_m.4214	353	K	TRINITY_DN102224_c0_g1|g.4214 ORF TRINITY_DN102224_c0_g1|g.4214 TRINITY_DN102224_c0_g1_m.4214 type:complete len:723 (+) TRINITY_DN102224_c0_g1:294-2462(+)	1	0.00847193	67.464	IK(1)ANLQSR	2	0.49941	1
	TRINITY_DN102224_c0_g1_m.4214	707	K	TRINITY_DN102224_c0_g1|g.4214 ORF TRINITY_DN102224_c0_g1|g.4214 TRINITY_DN102224_c0_g1_m.4214 type:complete len:723 (+) TRINITY_DN102224_c0_g1:294-2462(+)	1	0.00123638	73.655	AAK(1)GSPLSAAVER	2	-0.63378	1
	TRINITY_DN102224_c0_g1_m.4214	45	K	TRINITY_DN102224_c0_g1|g.4214 ORF TRINITY_DN102224_c0_g1|g.4214 TRINITY_DN102224_c0_g1_m.4214 type:complete len:723 (+) TRINITY_DN102224_c0_g1:294-2462(+)	1	0.0102794	50.834	DNYEQALK(1)R	2	1.8649	1
	TRINITY_DN102224_c0_g1_m.4214	378	K	TRINITY_DN102224_c0_g1|g.4214 ORF TRINITY_DN102224_c0_g1|g.4214 TRINITY_DN102224_c0_g1_m.4214 type:complete len:723 (+) TRINITY_DN102224_c0_g1:294-2462(+)	1	1.05405e-05	66.619	TLSLVK(1)GVLDYESFR	2	2.3545	1
	TRINITY_DN102224_c0_g1_m.4214	168	K	TRINITY_DN102224_c0_g1|g.4214 ORF TRINITY_DN102224_c0_g1|g.4214 TRINITY_DN102224_c0_g1_m.4214 type:complete len:723 (+) TRINITY_DN102224_c0_g1:294-2462(+)	1	0.00166032	69.276	ALEMILLSK(1)SIK	2	0.66259	1
	TRINITY_DN102260_c1_g1_m.4277	332	K	TRINITY_DN102260_c1_g1|g.4277 ORF TRINITY_DN102260_c1_g1|g.4277 TRINITY_DN102260_c1_g1_m.4277 type:complete len:862 (+) TRINITY_DN102260_c1_g1:208-2793(+)	1	3.61103e-06	124.81	VAELLNQFK(1)GR	2	1.3583	1
	TRINITY_DN102274_c11_g5_m.4307	120	K	TRINITY_DN102274_c11_g5|g.4307 ORF TRINITY_DN102274_c11_g5|g.4307 TRINITY_DN102274_c11_g5_m.4307 type:complete len:168 (+) TRINITY_DN102274_c11_g5:298-801(+)	1	0.0131393	40.502	FWIHTSNK(1)YR	2	0.2911	1
	TRINITY_DN102274_c11_g5_m.4307	157	K	TRINITY_DN102274_c11_g5|g.4307 ORF TRINITY_DN102274_c11_g5|g.4307 TRINITY_DN102274_c11_g5_m.4307 type:complete len:168 (+) TRINITY_DN102274_c11_g5:298-801(+)	1	0.0192596	49.058	IVK(1)TGYR	2	0.50899	1
	TRINITY_DN102283_c3_g9_m.4332	57	K	TRINITY_DN102283_c3_g9|g.4332 ORF TRINITY_DN102283_c3_g9|g.4332 TRINITY_DN102283_c3_g9_m.4332 type:internal len:108 (+) TRINITY_DN102283_c3_g9:3-323(+)	1	4.35136e-06	142.56	YTLGYK(1)TVLR	2	-0.66088	1
	TRINITY_DN102303_c4_g2_m.4372	50	K	TRINITY_DN102303_c4_g2|g.4372 ORF TRINITY_DN102303_c4_g2|g.4372 TRINITY_DN102303_c4_g2_m.4372 type:complete len:406 (+) TRINITY_DN102303_c4_g2:318-1535(+)	1	0.0454337	51.531	LGSIAIESALK(1)R	2	-0.51225	1
	TRINITY_DN102303_c4_g2_m.4372	287	K	TRINITY_DN102303_c4_g2|g.4372 ORF TRINITY_DN102303_c4_g2|g.4372 TRINITY_DN102303_c4_g2_m.4372 type:complete len:406 (+) TRINITY_DN102303_c4_g2:318-1535(+)	1	0.0163981	62.271	AHELGLQVIAK(1)IR	3	-1.2592	1
	TRINITY_DN102337_c5_g3_m.4456	188	K	TRINITY_DN102337_c5_g3|g.4456 ORF TRINITY_DN102337_c5_g3|g.4456 TRINITY_DN102337_c5_g3_m.4456 type:5prime_partial len:196 (+) TRINITY_DN102337_c5_g3:2-589(+)	1	3.65981e-06	91.939	NHIVTPSETK(1)YPISAR	2	-5.3502	2
	TRINITY_DN102337_c5_g3_m.4456	17	K	TRINITY_DN102337_c5_g3|g.4456 ORF TRINITY_DN102337_c5_g3|g.4456 TRINITY_DN102337_c5_g3_m.4456 type:5prime_partial len:196 (+) TRINITY_DN102337_c5_g3:2-589(+)	1	6.7329e-07	88.734	NFEGLDLGK(1)MEK	2	-2.2291	1
	TRINITY_DN102337_c5_g3_m.4456	20	K	TRINITY_DN102337_c5_g3|g.4456 ORF TRINITY_DN102337_c5_g3|g.4456 TRINITY_DN102337_c5_g3_m.4456 type:5prime_partial len:196 (+) TRINITY_DN102337_c5_g3:2-589(+)	1	1.08953e-20	140.78	MEK(1)SDDSGLASYVAGQIDR	2	-0.33303	1
	TRINITY_DN102398_c1_g1_m.4587	61	K	TRINITY_DN102398_c1_g1|g.4587 ORF TRINITY_DN102398_c1_g1|g.4587 TRINITY_DN102398_c1_g1_m.4587 type:complete len:469 (+) TRINITY_DN102398_c1_g1:175-1581(+)	1	0.0616222	41.025	FK(1)NELER	2	1.0115	1
	TRINITY_DN102422_c0_g1_m.4640	183	K	TRINITY_DN102422_c0_g1|g.4640 ORF TRINITY_DN102422_c0_g1|g.4640 TRINITY_DN102422_c0_g1_m.4640 type:5prime_partial len:373 (+) TRINITY_DN102422_c0_g1:1-1119(+)	1	0.000212899	76.85	FSK(1)VFNEGMR	2	-2.5666	1
	TRINITY_DN102460_c1_g1_m.4730	201	K	TRINITY_DN102460_c1_g1|g.4730 ORF TRINITY_DN102460_c1_g1|g.4730 TRINITY_DN102460_c1_g1_m.4730 type:5prime_partial len:1404 (+) TRINITY_DN102460_c1_g1:3-4214(+)	1	6.9189e-06	75.969	VVK(1)ADADGYVMGASGAR	2	1.9844	1
	TRINITY_DN102460_c1_g1_m.4730	296	K	TRINITY_DN102460_c1_g1|g.4730 ORF TRINITY_DN102460_c1_g1|g.4730 TRINITY_DN102460_c1_g1_m.4730 type:5prime_partial len:1404 (+) TRINITY_DN102460_c1_g1:3-4214(+)	1	0.0131108	44.82	VREDLQNK(1)LDFLR	3	-1.3966	1
	TRINITY_DN102460_c1_g1_m.4730	259	K	TRINITY_DN102460_c1_g1|g.4730 ORF TRINITY_DN102460_c1_g1|g.4730 TRINITY_DN102460_c1_g1_m.4730 type:5prime_partial len:1404 (+) TRINITY_DN102460_c1_g1:3-4214(+)	1	0.000450774	73.891	WSTK(1)NQEAISEALK	2	-4.3812	1
	TRINITY_DN102460_c1_g1_m.4730	967	K	TRINITY_DN102460_c1_g1|g.4730 ORF TRINITY_DN102460_c1_g1|g.4730 TRINITY_DN102460_c1_g1_m.4730 type:5prime_partial len:1404 (+) TRINITY_DN102460_c1_g1:3-4214(+)	1	1.84753e-06	94.791	FK(1)LDEGAEIKPR	2	0.0015295	1
	TRINITY_DN102469_c0_g1_m.4757	165	K	TRINITY_DN102469_c0_g1|g.4757 ORF TRINITY_DN102469_c0_g1|g.4757 TRINITY_DN102469_c0_g1_m.4757 type:complete len:985 (+) TRINITY_DN102469_c0_g1:37-2991(+)	1	2.00408e-05	91.939	LK(1)IDEDYSAPSAPSK	2	-0.065256	1
	TRINITY_DN102523_c1_g1_m.4888	549	K	TRINITY_DN102523_c1_g1|g.4888 ORF TRINITY_DN102523_c1_g1|g.4888 TRINITY_DN102523_c1_g1_m.4888 type:complete len:1047 (+) TRINITY_DN102523_c1_g1:255-3395(+)	1	0.00479693	81.335	NEEEANLEAK(1)R	2	-1.7117	1
	TRINITY_DN102523_c1_g1_m.4888	383	K	TRINITY_DN102523_c1_g1|g.4888 ORF TRINITY_DN102523_c1_g1|g.4888 TRINITY_DN102523_c1_g1_m.4888 type:complete len:1047 (+) TRINITY_DN102523_c1_g1:255-3395(+)	1	0.0121791	50.314	ITPAHDPNDFEVGK(1)R	3	2.0783	1
	TRINITY_DN102523_c1_g1_m.4888	37	K	TRINITY_DN102523_c1_g1|g.4888 ORF TRINITY_DN102523_c1_g1|g.4888 TRINITY_DN102523_c1_g1_m.4888 type:complete len:1047 (+) TRINITY_DN102523_c1_g1:255-3395(+)	1	0.0590312	42.835	AEATK(1)LQK	2	-0.81391	1
	TRINITY_DN102553_c0_g4_m.4950	314	K	TRINITY_DN102553_c0_g4|g.4950 ORF TRINITY_DN102553_c0_g4|g.4950 TRINITY_DN102553_c0_g4_m.4950 type:complete len:418 (+) TRINITY_DN102553_c0_g4:94-1347(+)	1	2.87734e-06	97.175	AYMDSLK(1)EPGPTGK	2	2.7933	1
	TRINITY_DN102593_c2_g1_m.5034	105	K	TRINITY_DN102593_c2_g1|g.5034 ORF TRINITY_DN102593_c2_g1|g.5034 TRINITY_DN102593_c2_g1_m.5034 type:complete len:359 (+) TRINITY_DN102593_c2_g1:226-1302(+)	1	0.00474944	96.311	LPK(1)EFDAR	2	-1.2173	1
	TRINITY_DN102600_c0_g1_m.5048	25	K	TRINITY_DN102600_c0_g1|g.5048 ORF TRINITY_DN102600_c0_g1|g.5048 TRINITY_DN102600_c0_g1_m.5048 type:complete len:399 (+) TRINITY_DN102600_c0_g1:299-1495(+)	1	0.000290229	102.55	LLNYK(1)EQESR	2	-0.52198	1
	TRINITY_DN102600_c0_g1_m.5048	319	K	TRINITY_DN102600_c0_g1|g.5048 ORF TRINITY_DN102600_c0_g1|g.5048 TRINITY_DN102600_c0_g1_m.5048 type:complete len:399 (+) TRINITY_DN102600_c0_g1:299-1495(+)	1	0.000291545	72.846	MEILK(1)IHAAGIAK	2	2.4105	1
	TRINITY_DN102605_c0_g3_m.5060	587	K	TRINITY_DN102605_c0_g3|g.5060 ORF TRINITY_DN102605_c0_g3|g.5060 TRINITY_DN102605_c0_g3_m.5060 type:complete len:688 (+) TRINITY_DN102605_c0_g3:186-2249(+)	1	0.0109395	54.436	VK(1)IQDLEK	2	0.65235	1
	TRINITY_DN102649_c2_g1_m.5144	448	K	TRINITY_DN102649_c2_g1|g.5144 ORF TRINITY_DN102649_c2_g1|g.5144 TRINITY_DN102649_c2_g1_m.5144 type:5prime_partial len:469 (+) TRINITY_DN102649_c2_g1:3-1409(+)	1	2.11962e-05	107.08	GAGHEVPLHK(1)PR	3	0.86154	2
	TRINITY_DN102650_c0_g1_m.5147	660	K	TRINITY_DN102650_c0_g1|g.5147 ORF TRINITY_DN102650_c0_g1|g.5147 TRINITY_DN102650_c0_g1_m.5147 type:complete len:954 (+) TRINITY_DN102650_c0_g1:330-3191(+)	1	0.0661389	49.097	TEK(1)SLWAGNEVEVQR	2	-4.4441	1
	TRINITY_DN102742_c0_g1_m.5316	81	K	TRINITY_DN102742_c0_g1|g.5316 ORF TRINITY_DN102742_c0_g1|g.5316 TRINITY_DN102742_c0_g1_m.5316 type:complete len:308 (+) TRINITY_DN102742_c0_g1:263-1186(+)	1	0.00288743	73.655	HQEVGHK(1)SLLK	3	1.0429	1
	TRINITY_DN102742_c0_g1_m.5316	107	K	TRINITY_DN102742_c0_g1|g.5316 ORF TRINITY_DN102742_c0_g1|g.5316 TRINITY_DN102742_c0_g1_m.5316 type:complete len:308 (+) TRINITY_DN102742_c0_g1:263-1186(+)	1	0.0178022	52.591	EPESMK(1)ELR	2	3.3933	1
	TRINITY_DN102755_c2_g1_m.5350	313	K	TRINITY_DN102755_c2_g1|g.5350 ORF TRINITY_DN102755_c2_g1|g.5350 TRINITY_DN102755_c2_g1_m.5350 type:complete len:423 (+) TRINITY_DN102755_c2_g1:130-1398(+)	1	3.24807e-05	96.957	TIEDTWNLFHK(1)K	2	-0.77111	1
	TRINITY_DN102851_c1_g1_m.5549	203	K	TRINITY_DN102851_c1_g1|g.5549 ORF TRINITY_DN102851_c1_g1|g.5549 TRINITY_DN102851_c1_g1_m.5549 type:5prime_partial len:395 (+) TRINITY_DN102851_c1_g1:1-1185(+)	1	0.00184165	93.467	LPAVVSK(1)LHK	2	1.0003	1
	TRINITY_DN102851_c1_g1_m.5549	206	K	TRINITY_DN102851_c1_g1|g.5549 ORF TRINITY_DN102851_c1_g1|g.5549 TRINITY_DN102851_c1_g1_m.5549 type:5prime_partial len:395 (+) TRINITY_DN102851_c1_g1:1-1185(+)	1	0.00381161	96.666	LHK(1)AINR	2	0.62272	1
	TRINITY_DN102851_c1_g1_m.5549	247	K	TRINITY_DN102851_c1_g1|g.5549 ORF TRINITY_DN102851_c1_g1|g.5549 TRINITY_DN102851_c1_g1_m.5549 type:5prime_partial len:395 (+) TRINITY_DN102851_c1_g1:1-1185(+)	1	0.0142036	51.531	LSEAHK(1)FLQSR	2	-1.3084	1
	TRINITY_DN102902_c1_g3_m.5661	80	K	TRINITY_DN102902_c1_g3|g.5661 ORF TRINITY_DN102902_c1_g3|g.5661 TRINITY_DN102902_c1_g3_m.5661 type:5prime_partial len:175 (+) TRINITY_DN102902_c1_g3:2-526(+)	1	0.000836946	83.623	GEEFEQTK(1)K	2	1.3489	1
	TRINITY_DN102902_c3_g1_m.5664	89	K	TRINITY_DN102902_c3_g1|g.5664 ORF TRINITY_DN102902_c3_g1|g.5664 TRINITY_DN102902_c3_g1_m.5664 type:complete len:472 (+) TRINITY_DN102902_c3_g1:132-1547(+)	1	3.36402e-06	138.23	ILYSQK(1)DVLAR	2	1.4663	1
	TRINITY_DN102910_c56_g26_m.5674	278	K	TRINITY_DN102910_c56_g26|g.5674 ORF TRINITY_DN102910_c56_g26|g.5674 TRINITY_DN102910_c56_g26_m.5674 type:complete len:358 (+) TRINITY_DN102910_c56_g26:168-1241(+)	1	2.23485e-18	214.14	HK(1)EHIASYGEGNER	3	0.80029	2
	TRINITY_DN102910_c56_g26_m.5674	326	K	TRINITY_DN102910_c56_g26|g.5674 ORF TRINITY_DN102910_c56_g26|g.5674 TRINITY_DN102910_c56_g26_m.5674 type:complete len:358 (+) TRINITY_DN102910_c56_g26:168-1241(+)	1	0.0178022	52.591	NGK(1)GYFEDR	2	0.36821	1
	TRINITY_DN102910_c56_g26_m.5674	255	K	TRINITY_DN102910_c56_g26|g.5674 ORF TRINITY_DN102910_c56_g26|g.5674 TRINITY_DN102910_c56_g26_m.5674 type:complete len:358 (+) TRINITY_DN102910_c56_g26:168-1241(+)	1	0.000555623	54.813	PIQGDWNGAGAHTNYSTK(1)SMR	3	1.9635	1
	TRINITY_DN102910_c56_g26_m.5674	267	K	TRINITY_DN102910_c56_g26|g.5674 ORF TRINITY_DN102910_c56_g26|g.5674 TRINITY_DN102910_c56_g26_m.5674 type:complete len:358 (+) TRINITY_DN102910_c56_g26:168-1241(+)	1	0.000221593	115.86	EEGGYEIIK(1)K	2	-1.2393	1
	TRINITY_DN102931_c0_g1_m.5722	590	K	TRINITY_DN102931_c0_g1|g.5722 ORF TRINITY_DN102931_c0_g1|g.5722 TRINITY_DN102931_c0_g1_m.5722 type:complete len:609 (+) TRINITY_DN102931_c0_g1:270-2096(+)	1	0.0168056	62.705	SIGLIGHTFDQK(1)R	2	1.965	1
	TRINITY_DN102931_c0_g1_m.5722	19	K	TRINITY_DN102931_c0_g1|g.5722 ORF TRINITY_DN102931_c0_g1|g.5722 TRINITY_DN102931_c0_g1_m.5722 type:complete len:609 (+) TRINITY_DN102931_c0_g1:270-2096(+)	1	0.00014298	88.734	NTQALFYNYK(1)QLPIQR	2	-1.4406	1
	TRINITY_DN103010_c1_g1_m.5891	269	K	TRINITY_DN103010_c1_g1|g.5891 ORF TRINITY_DN103010_c1_g1|g.5891 TRINITY_DN103010_c1_g1_m.5891 type:complete len:863 (+) TRINITY_DN103010_c1_g1:142-2730(+)	1	0.00300743	63.766	FGHLK(1)FADFLGYGLK	2	3.9318	1
	TRINITY_DN103010_c1_g1_m.5891	173	K	TRINITY_DN103010_c1_g1|g.5891 ORF TRINITY_DN103010_c1_g1|g.5891 TRINITY_DN103010_c1_g1_m.5891 type:complete len:863 (+) TRINITY_DN103010_c1_g1:142-2730(+)	1	9.61896e-07	65.421	IFFANDTYLPEHTPGPLK(1)GYR	3	-2.6786	1
	TRINITY_DN103010_c1_g1_m.5891	134	K	TRINITY_DN103010_c1_g1|g.5891 ORF TRINITY_DN103010_c1_g1|g.5891 TRINITY_DN103010_c1_g1_m.5891 type:complete len:863 (+) TRINITY_DN103010_c1_g1:142-2730(+)	1	9.12592e-05	90.263	SITIDDFPGK(1)GR	2	-0.07685	1
	TRINITY_DN103010_c1_g1_m.5891	752	K	TRINITY_DN103010_c1_g1|g.5891 ORF TRINITY_DN103010_c1_g1|g.5891 TRINITY_DN103010_c1_g1_m.5891 type:complete len:863 (+) TRINITY_DN103010_c1_g1:142-2730(+)	1	0.00462478	55.354	FMPQPGTAEYEELEK(1)NPEK	2	-0.52719	1
	TRINITY_DN103010_c1_g1_m.5891	550	K	TRINITY_DN103010_c1_g1|g.5891 ORF TRINITY_DN103010_c1_g1|g.5891 TRINITY_DN103010_c1_g1_m.5891 type:complete len:863 (+) TRINITY_DN103010_c1_g1:142-2730(+)	1	5.51579e-14	166.71	QLSALHPINK(1)LLAPHYR	3	-0.14202	1
	TRINITY_DN103010_c1_g1_m.5891	451	K	TRINITY_DN103010_c1_g1|g.5891 ORF TRINITY_DN103010_c1_g1|g.5891 TRINITY_DN103010_c1_g1_m.5891 type:complete len:863 (+) TRINITY_DN103010_c1_g1:142-2730(+)	1	1.86166e-10	143.22	INSTDNK(1)IYASR	2	-3.0731	1
	TRINITY_DN103071_c1_g6_m.6030	22	K	TRINITY_DN103071_c1_g6|g.6030 ORF TRINITY_DN103071_c1_g6|g.6030 TRINITY_DN103071_c1_g6_m.6030 type:5prime_partial len:274 (+) TRINITY_DN103071_c1_g6:3-824(+)	1	7.89128e-07	99.174	TIK(1)FYTECFGMK	2	-2.551	1
	TRINITY_DN103071_c1_g6_m.6030	233	K	TRINITY_DN103071_c1_g6|g.6030 ORF TRINITY_DN103071_c1_g6|g.6030 TRINITY_DN103071_c1_g6_m.6030 type:5prime_partial len:274 (+) TRINITY_DN103071_c1_g6:3-824(+)	1	0.0214517	51.864	ELGGK(1)ITR	2	0.21691	1
	TRINITY_DN103071_c1_g6_m.6030	156	K	TRINITY_DN103071_c1_g6|g.6030 ORF TRINITY_DN103071_c1_g6|g.6030 TRINITY_DN103071_c1_g6_m.6030 type:5prime_partial len:274 (+) TRINITY_DN103071_c1_g6:3-824(+)	1	6.57005e-07	103.87	SIQFYEK(1)ACGMK	2	8.4836	1
	TRINITY_DN103071_c1_g6_m.6030	228	K	TRINITY_DN103071_c1_g6|g.6030 ORF TRINITY_DN103071_c1_g6|g.6030 TRINITY_DN103071_c1_g6_m.6030 type:5prime_partial len:274 (+) TRINITY_DN103071_c1_g6:3-824(+)	1	3.2886e-18	184.65	SAQVVELVTK(1)ELGGK	2	2.4855	1
	TRINITY_DN103071_c1_g6_m.6030	258	K	TRINITY_DN103071_c1_g6|g.6030 ORF TRINITY_DN103071_c1_g6|g.6030 TRINITY_DN103071_c1_g6_m.6030 type:5prime_partial len:274 (+) TRINITY_DN103071_c1_g6:3-824(+)	1	0.0108349	46.528	VTSFLDPDGWK(1)VVFVDHSDFLK	3	1.8128	1
	TRINITY_DN103095_c2_g16_m.6072	160	K	TRINITY_DN103095_c2_g16|g.6072 ORF TRINITY_DN103095_c2_g16|g.6072 TRINITY_DN103095_c2_g16_m.6072 type:5prime_partial len:219 (+) TRINITY_DN103095_c2_g16:1-657(+)	1	0.00590269	76.833	VEEMVK(1)R	2	-0.90814	1
	TRINITY_DN103119_c2_g2_m.6120	247	K	TRINITY_DN103119_c2_g2|g.6120 ORF TRINITY_DN103119_c2_g2|g.6120 TRINITY_DN103119_c2_g2_m.6120 type:5prime_partial len:522 (+) TRINITY_DN103119_c2_g2:2-1567(+)	1	0.0301866	49.16	IYYNEYNSK(1)K	2	-0.12299	1
	TRINITY_DN103154_c0_g1_m.6194	269	K	TRINITY_DN103154_c0_g1|g.6194 ORF TRINITY_DN103154_c0_g1|g.6194 TRINITY_DN103154_c0_g1_m.6194 type:complete len:546 (+) TRINITY_DN103154_c0_g1:883-2520(+)	1	0.00145337	83.438	YVAVGNEDCGK(1)K	2	-1.4116	1
	TRINITY_DN103154_c0_g1_m.6194	457	K	TRINITY_DN103154_c0_g1|g.6194 ORF TRINITY_DN103154_c0_g1|g.6194 TRINITY_DN103154_c0_g1_m.6194 type:complete len:546 (+) TRINITY_DN103154_c0_g1:883-2520(+)	1	4.92742e-08	108.24	IK(1)IVNVGSNTVNLK	2	-1.1926	1
	TRINITY_DN103154_c0_g1_m.6194	160	K	TRINITY_DN103154_c0_g1|g.6194 ORF TRINITY_DN103154_c0_g1|g.6194 TRINITY_DN103154_c0_g1_m.6194 type:complete len:546 (+) TRINITY_DN103154_c0_g1:883-2520(+)	1	0.00966247	71.896	WK(1)ETMVSWEER	2	3.0525	1
	TRINITY_DN103194_c1_g1_m.6280	560	K	TRINITY_DN103194_c1_g1|g.6280 ORF TRINITY_DN103194_c1_g1|g.6280 TRINITY_DN103194_c1_g1_m.6280 type:complete len:715 (+) TRINITY_DN103194_c1_g1:193-2337(+)	1	0.000247749	65.173	LK(1)LYEPYEFHVINSDK	2	-1.3614	2
	TRINITY_DN103194_c1_g1_m.6280	574	K	TRINITY_DN103194_c1_g1|g.6280 ORF TRINITY_DN103194_c1_g1|g.6280 TRINITY_DN103194_c1_g1_m.6280 type:complete len:715 (+) TRINITY_DN103194_c1_g1:193-2337(+)	1	0.000995677	54.556	LYEPYEFHVINSDK(1)TTR	3	-1.0621	1
	TRINITY_DN103200_c0_g1_m.6298	442	K	TRINITY_DN103200_c0_g1|g.6298 ORF TRINITY_DN103200_c0_g1|g.6298 TRINITY_DN103200_c0_g1_m.6298 type:complete len:509 (+) TRINITY_DN103200_c0_g1:475-2001(+)	1	0.0318526	66.664	SDTNVYEGK(1)TGK	2	0.77439	1
	TRINITY_DN103240_c4_g1_m.6409	201	K	TRINITY_DN103240_c4_g1|g.6409 ORF TRINITY_DN103240_c4_g1|g.6409 TRINITY_DN103240_c4_g1_m.6409 type:complete len:239 (+) TRINITY_DN103240_c4_g1:137-853(+)	1	0.0113504	51.531	STSAHFIK(1)DK	2	1.7086	1
	TRINITY_DN103260_c1_g2_m.6433	893	K	TRINITY_DN103260_c1_g2|g.6433 ORF TRINITY_DN103260_c1_g2|g.6433 TRINITY_DN103260_c1_g2_m.6433 type:complete len:1058 (+) TRINITY_DN103260_c1_g2:123-3296(+)	1	0.0121927	51.864	NLNK(1)ENLDIK	2	-12.857	1
	TRINITY_DN103270_c0_g1_m.6447	1574	K	TRINITY_DN103270_c0_g1|g.6447 ORF TRINITY_DN103270_c0_g1|g.6447 TRINITY_DN103270_c0_g1_m.6447 type:complete len:1627 (+) TRINITY_DN103270_c0_g1:220-5100(+)	1	2.29127e-05	101.64	SLIEAHVEK(1)TGSK	2	-1.8529	1
	TRINITY_DN103270_c0_g1_m.6447	245	K	TRINITY_DN103270_c0_g1|g.6447 ORF TRINITY_DN103270_c0_g1|g.6447 TRINITY_DN103270_c0_g1_m.6447 type:complete len:1627 (+) TRINITY_DN103270_c0_g1:220-5100(+)	1	0.00487162	62.454	VPK(1)EESVDDIER	2	-1.5723	1
	TRINITY_DN103270_c0_g1_m.6447	1075	K	TRINITY_DN103270_c0_g1|g.6447 ORF TRINITY_DN103270_c0_g1|g.6447 TRINITY_DN103270_c0_g1_m.6447 type:complete len:1627 (+) TRINITY_DN103270_c0_g1:220-5100(+)	1	0.00284727	66.619	IAQGAK(1)PGEGGQLPGK	2	-1.2595	1
	TRINITY_DN103270_c0_g1_m.6447	198	K	TRINITY_DN103270_c0_g1|g.6447 ORF TRINITY_DN103270_c0_g1|g.6447 TRINITY_DN103270_c0_g1_m.6447 type:complete len:1627 (+) TRINITY_DN103270_c0_g1:220-5100(+)	1	0.00610583	62.88	AAK(1)TAIMR	2	-1.5022	1
	TRINITY_DN103270_c0_g1_m.6447	1551	K	TRINITY_DN103270_c0_g1|g.6447 ORF TRINITY_DN103270_c0_g1|g.6447 TRINITY_DN103270_c0_g1_m.6447 type:complete len:1627 (+) TRINITY_DN103270_c0_g1:220-5100(+)	1	0.0056035	72.355	EIVK(1)IQR	2	0.61186	1
	TRINITY_DN103270_c0_g1_m.6447	1547	K	TRINITY_DN103270_c0_g1|g.6447 ORF TRINITY_DN103270_c0_g1|g.6447 TRINITY_DN103270_c0_g1_m.6447 type:complete len:1627 (+) TRINITY_DN103270_c0_g1:220-5100(+)	1	0.0568691	49.325	VNK(1)EIVK	2	-0.54285	1
	TRINITY_DN103270_c0_g1_m.6447	821	K	TRINITY_DN103270_c0_g1|g.6447 ORF TRINITY_DN103270_c0_g1|g.6447 TRINITY_DN103270_c0_g1_m.6447 type:complete len:1627 (+) TRINITY_DN103270_c0_g1:220-5100(+)	1	0.0695982	42.075	AVK(1)SGLLK	2	-0.33794	1
	TRINITY_DN103270_c0_g1_m.6447	1372	K	TRINITY_DN103270_c0_g1|g.6447 ORF TRINITY_DN103270_c0_g1|g.6447 TRINITY_DN103270_c0_g1_m.6447 type:complete len:1627 (+) TRINITY_DN103270_c0_g1:220-5100(+)	1	1.62302e-07	119.43	EVTK(1)AVEIHNVDR	2	-1.8139	2
	TRINITY_DN103270_c0_g1_m.6447	921	K	TRINITY_DN103270_c0_g1|g.6447 ORF TRINITY_DN103270_c0_g1|g.6447 TRINITY_DN103270_c0_g1_m.6447 type:complete len:1627 (+) TRINITY_DN103270_c0_g1:220-5100(+)	1	0.00466948	105.22	LLHK(1)AVR	2	1.4409	1
	TRINITY_DN103270_c0_g1_m.6447	963	K	TRINITY_DN103270_c0_g1|g.6447 ORF TRINITY_DN103270_c0_g1|g.6447 TRINITY_DN103270_c0_g1_m.6447 type:complete len:1627 (+) TRINITY_DN103270_c0_g1:220-5100(+)	1	6.59433e-05	97.084	RPPIPVGK(1)VEPASSIVQR	3	-2.4917	1
	TRINITY_DN103287_c0_g1_m.6485	130	K	TRINITY_DN103287_c0_g1|g.6485 ORF TRINITY_DN103287_c0_g1|g.6485 TRINITY_DN103287_c0_g1_m.6485 type:complete len:1186 (+) TRINITY_DN103287_c0_g1:245-3802(+)	1	0.0387441	52.837	YVK(1)EWEEVITR	2	0.53166	1
	TRINITY_DN103287_c0_g1_m.6485	899	K	TRINITY_DN103287_c0_g1|g.6485 ORF TRINITY_DN103287_c0_g1|g.6485 TRINITY_DN103287_c0_g1_m.6485 type:complete len:1186 (+) TRINITY_DN103287_c0_g1:245-3802(+)	1	7.5301e-05	82.437	LK(1)EYVLEELNVK	2	1.7905	1
	TRINITY_DN103287_c0_g1_m.6485	458	K	TRINITY_DN103287_c0_g1|g.6485 ORF TRINITY_DN103287_c0_g1|g.6485 TRINITY_DN103287_c0_g1_m.6485 type:complete len:1186 (+) TRINITY_DN103287_c0_g1:245-3802(+)	1	0.0062987	60.547	IK(1)DQLLECNK	2	-1.8559	1
	TRINITY_DN103348_c8_g2_m.6625	652	K	TRINITY_DN103348_c8_g2|g.6625 ORF TRINITY_DN103348_c8_g2|g.6625 TRINITY_DN103348_c8_g2_m.6625 type:complete len:843 (+) TRINITY_DN103348_c8_g2:241-2769(+)	1	0.0100726	56.014	GIALHK(1)MIR	2	-2.2948	1
	TRINITY_DN103413_c0_g1_m.6788	483	K	TRINITY_DN103413_c0_g1|g.6788 ORF TRINITY_DN103413_c0_g1|g.6788 TRINITY_DN103413_c0_g1_m.6788 type:complete len:573 (+) TRINITY_DN103413_c0_g1:172-1890(+)	1	0.00701192	65.12	ANTK(1)ALAENEGEGLAK	2	-2.6869	1
	TRINITY_DN103413_c0_g1_m.6788	366	K	TRINITY_DN103413_c0_g1|g.6788 ORF TRINITY_DN103413_c0_g1|g.6788 TRINITY_DN103413_c0_g1_m.6788 type:complete len:573 (+) TRINITY_DN103413_c0_g1:172-1890(+)	1	0.000371795	81.409	APFTK(1)GLGLESVNVTTQR	2	-2.8829	1
	TRINITY_DN103413_c0_g1_m.6788	151	K	TRINITY_DN103413_c0_g1|g.6788 ORF TRINITY_DN103413_c0_g1|g.6788 TRINITY_DN103413_c0_g1_m.6788 type:complete len:573 (+) TRINITY_DN103413_c0_g1:172-1890(+)	1	2.38308e-05	48.037	MHELQSEDHLK(1)SMGLQVLNHSYDR	3	-2.1019	1
	TRINITY_DN103443_c0_g2_m.6843	590	K	TRINITY_DN103443_c0_g2|g.6843 ORF TRINITY_DN103443_c0_g2|g.6843 TRINITY_DN103443_c0_g2_m.6843 type:complete len:983 (+) TRINITY_DN103443_c0_g2:320-3268(+)	1	1.46405e-05	80.815	VVK(1)ETAENVDEAVR	2	-3.3272	1
	TRINITY_DN103507_c0_g4_m.7000	173	K	TRINITY_DN103507_c0_g4|g.7000 ORF TRINITY_DN103507_c0_g4|g.7000 TRINITY_DN103507_c0_g4_m.7000 type:complete len:204 (+) TRINITY_DN103507_c0_g4:193-804(+)	1	0.000862149	54.27	FDWDQTHK(1)AWVYR	2	2.8135	2
	TRINITY_DN103541_c0_g1_m.7077	479	K	TRINITY_DN103541_c0_g1|g.7077 ORF TRINITY_DN103541_c0_g1|g.7077 TRINITY_DN103541_c0_g1_m.7077 type:complete len:554 (+) TRINITY_DN103541_c0_g1:221-1882(+)	1	3.29131e-06	106	GGTVQK(1)IIEEK	2	-3.1996	1
	TRINITY_DN103585_c0_g1_m.7179	476	K	TRINITY_DN103585_c0_g1|g.7179 ORF TRINITY_DN103585_c0_g1|g.7179 TRINITY_DN103585_c0_g1_m.7179 type:complete len:644 (+) TRINITY_DN103585_c0_g1:260-2191(+)	1	0.00202001	70.638	SFK(1)SGQAPILVATDVAAR	2	0.45855	1
	TRINITY_DN103612_c1_g1_m.7236	180	K	TRINITY_DN103612_c1_g1|g.7236 ORF TRINITY_DN103612_c1_g1|g.7236 TRINITY_DN103612_c1_g1_m.7236 type:complete len:410 (+) TRINITY_DN103612_c1_g1:326-1555(+)	1	0.00082693	50.116	ILK(1)QVGAYADAEK	2	0.23619	1
	TRINITY_DN103612_c1_g1_m.7236	312	K	TRINITY_DN103612_c1_g1|g.7236 ORF TRINITY_DN103612_c1_g1|g.7236 TRINITY_DN103612_c1_g1_m.7236 type:complete len:410 (+) TRINITY_DN103612_c1_g1:326-1555(+)	1	2.76008e-13	137.4	IINSDEVQSVVK(1)PINK	2	-2.6598	1
	TRINITY_DN103612_c1_g1_m.7236	292	K	TRINITY_DN103612_c1_g1|g.7236 ORF TRINITY_DN103612_c1_g1|g.7236 TRINITY_DN103612_c1_g1_m.7236 type:complete len:410 (+) TRINITY_DN103612_c1_g1:326-1555(+)	1	5.9843e-06	123.42	PK(1)MTNADLGR	2	0.18766	2
	TRINITY_DN103612_c1_g1_m.7236	248	K	TRINITY_DN103612_c1_g1|g.7236 ORF TRINITY_DN103612_c1_g1|g.7236 TRINITY_DN103612_c1_g1_m.7236 type:complete len:410 (+) TRINITY_DN103612_c1_g1:326-1555(+)	1	9.99864e-12	126.29	LNVLK(1)LAPGGHLGR	2	0.12735	2
	TRINITY_DN103612_c1_g1_m.7236	372	K	TRINITY_DN103612_c1_g1|g.7236 ORF TRINITY_DN103612_c1_g1|g.7236 TRINITY_DN103612_c1_g1_m.7236 type:complete len:410 (+) TRINITY_DN103612_c1_g1:326-1555(+)	1	0.000132115	129.28	SSLTK(1)EEAAK	2	1.0275	1
	TRINITY_DN103612_c1_g1_m.7236	263	K	TRINITY_DN103612_c1_g1|g.7236 ORF TRINITY_DN103612_c1_g1|g.7236 TRINITY_DN103612_c1_g1_m.7236 type:complete len:410 (+) TRINITY_DN103612_c1_g1:326-1555(+)	1	0.0307264	47.561	FIVWTK(1)SAFEK	2	1.4511	1
	TRINITY_DN103612_c1_g1_m.7236	5	K	TRINITY_DN103612_c1_g1|g.7236 ORF TRINITY_DN103612_c1_g1|g.7236 TRINITY_DN103612_c1_g1_m.7236 type:complete len:410 (+) TRINITY_DN103612_c1_g1:326-1555(+)	1	0.0420022	45.489	AASK(1)PITR	2	-0.6008	1
	TRINITY_DN103612_c1_g1_m.7239	85	K	TRINITY_DN103612_c1_g1|g.7239 ORF TRINITY_DN103612_c1_g1|g.7239 TRINITY_DN103612_c1_g1_m.7239 type:complete len:112 (+) TRINITY_DN103612_c1_g1:1631-1966(+)	1	6.03787e-19	180.17	NNTEYK(1)LETFSGVYR	2	0.37782	1
	TRINITY_DN103612_c1_g1_m.7239	77	K	TRINITY_DN103612_c1_g1|g.7239 ORF TRINITY_DN103612_c1_g1|g.7239 TRINITY_DN103612_c1_g1_m.7239 type:complete len:112 (+) TRINITY_DN103612_c1_g1:1631-1966(+)	1	0.000169966	90.308	IFLDPK(1)ER	2	-1.2767	1
	TRINITY_DN103612_c1_g1_m.7239	71	K	TRINITY_DN103612_c1_g1|g.7239 ORF TRINITY_DN103612_c1_g1|g.7239 TRINITY_DN103612_c1_g1_m.7239 type:complete len:112 (+) TRINITY_DN103612_c1_g1:1631-1966(+)	1	0.0153784	46.033	IVK(1)IFLDPK	2	-2.359	1
	TRINITY_DN103612_c1_g1_m.7239	10	K	TRINITY_DN103612_c1_g1|g.7239 ORF TRINITY_DN103612_c1_g1|g.7239 TRINITY_DN103612_c1_g1_m.7239 type:complete len:112 (+) TRINITY_DN103612_c1_g1:1631-1966(+)	1	0.000604927	101.64	FSGK(1)DVIIIATR	2	-0.30463	1
	TRINITY_DN103612_c1_g1_m.7239	58	K	TRINITY_DN103612_c1_g1|g.7239 ORF TRINITY_DN103612_c1_g1|g.7239 TRINITY_DN103612_c1_g1_m.7239 type:complete len:112 (+) TRINITY_DN103612_c1_g1:1631-1966(+)	1	0.00108824	70.552	TLTAVHDAILEDLVYPAEIVGK(1)R	3	-0.73311	1
	TRINITY_DN103639_c0_g1_m.7301	66	K	TRINITY_DN103639_c0_g1|g.7301 ORF TRINITY_DN103639_c0_g1|g.7301 TRINITY_DN103639_c0_g1_m.7301 type:complete len:767 (+) TRINITY_DN103639_c0_g1:168-2468(+)	1	0.0169855	40.861	LTLQEK(1)VGFLGNK	2	-2.2501	1
	TRINITY_DN103639_c0_g1_m.7301	55	K	TRINITY_DN103639_c0_g1|g.7301 ORF TRINITY_DN103639_c0_g1|g.7301 TRINITY_DN103639_c0_g1_m.7301 type:complete len:767 (+) TRINITY_DN103639_c0_g1:168-2468(+)	1	0.00471197	84.699	VK(1)DLVGR	2	0.61658	1
	TRINITY_DN103712_c0_g2_m.7439	416	K	TRINITY_DN103712_c0_g2|g.7439 ORF TRINITY_DN103712_c0_g2|g.7439 TRINITY_DN103712_c0_g2_m.7439 type:complete len:846 (+) TRINITY_DN103712_c0_g2:325-2862(+)	1	7.59266e-05	102.55	FK(1)AMVNSNHR	2	-1.0061	1
	TRINITY_DN103712_c0_g2_m.7439	751	K	TRINITY_DN103712_c0_g2|g.7439 ORF TRINITY_DN103712_c0_g2|g.7439 TRINITY_DN103712_c0_g2_m.7439 type:complete len:846 (+) TRINITY_DN103712_c0_g2:325-2862(+)	1	1.85548e-05	133.98	FEEAK(1)HFIR	2	0.18126	1
	TRINITY_DN103712_c0_g2_m.7439	133	K	TRINITY_DN103712_c0_g2|g.7439 ORF TRINITY_DN103712_c0_g2|g.7439 TRINITY_DN103712_c0_g2_m.7439 type:complete len:846 (+) TRINITY_DN103712_c0_g2:325-2862(+)	1	0.00551779	60.547	EK(1)DAALGNGGLGR	2	0.9081	1
	TRINITY_DN103712_c0_g2_m.7439	82	K	TRINITY_DN103712_c0_g2|g.7439 ORF TRINITY_DN103712_c0_g2|g.7439 TRINITY_DN103712_c0_g2_m.7439 type:complete len:846 (+) TRINITY_DN103712_c0_g2:325-2862(+)	1	0.0121265	61.042	WNDTYLHFHK(1)HDPK	3	-1.143	1
	TRINITY_DN103728_c4_g1_m.7477	413	K	TRINITY_DN103728_c4_g1|g.7477 ORF TRINITY_DN103728_c4_g1|g.7477 TRINITY_DN103728_c4_g1_m.7477 type:complete len:488 (+) TRINITY_DN103728_c4_g1:103-1566(+)	1	0.0111564	55.578	LYK(1)GTFSNWPIGVNR	2	2.5126	1
	TRINITY_DN103728_c4_g1_m.7477	236	K	TRINITY_DN103728_c4_g1|g.7477 ORF TRINITY_DN103728_c4_g1|g.7477 TRINITY_DN103728_c4_g1_m.7477 type:complete len:488 (+) TRINITY_DN103728_c4_g1:103-1566(+)	1	2.98166e-06	124.46	TSK(1)DGTIVDPR	2	0.094412	1
	TRINITY_DN103728_c4_g1_m.7477	249	K	TRINITY_DN103728_c4_g1|g.7477 ORF TRINITY_DN103728_c4_g1|g.7477 TRINITY_DN103728_c4_g1_m.7477 type:complete len:488 (+) TRINITY_DN103728_c4_g1:103-1566(+)	1	0.000986241	76.833	LILNK(1)VVR	2	-1.51	1
	TRINITY_DN103728_c4_g1_m.7477	380	K	TRINITY_DN103728_c4_g1|g.7477 ORF TRINITY_DN103728_c4_g1|g.7477 TRINITY_DN103728_c4_g1_m.7477 type:complete len:488 (+) TRINITY_DN103728_c4_g1:103-1566(+)	1	1.07796e-13	138.33	IEQQPDSTTK(1)AEAMEVLR	2	-3.0103	1
	TRINITY_DN103764_c10_g1_m.7567	487	K	TRINITY_DN103764_c10_g1|g.7567 ORF TRINITY_DN103764_c10_g1|g.7567 TRINITY_DN103764_c10_g1_m.7567 type:3prime_partial len:989 (+) TRINITY_DN103764_c10_g1:119-3082(+)	1	0.0240269	49.058	ALSDFK(1)R	2	-1.9795	1
	TRINITY_DN103789_c5_g2_m.7630	291	K	TRINITY_DN103789_c5_g2|g.7630 ORF TRINITY_DN103789_c5_g2|g.7630 TRINITY_DN103789_c5_g2_m.7630 type:5prime_partial len:413 (+) TRINITY_DN103789_c5_g2:3-1241(+)	1	1.11698e-47	231.92	IYSVNEGNAK(1)NWDGPTAK	2	-3.3144	1
	TRINITY_DN103789_c5_g2_m.7630	382	K	TRINITY_DN103789_c5_g2|g.7630 ORF TRINITY_DN103789_c5_g2|g.7630 TRINITY_DN103789_c5_g2_m.7630 type:5prime_partial len:413 (+) TRINITY_DN103789_c5_g2:3-1241(+)	1	0.0703937	47.349	ALDLVPK(1)K	2	-4.658	1
	TRINITY_DN103789_c5_g2_m.7630	97	K	TRINITY_DN103789_c5_g2|g.7630 ORF TRINITY_DN103789_c5_g2|g.7630 TRINITY_DN103789_c5_g2_m.7630 type:5prime_partial len:413 (+) TRINITY_DN103789_c5_g2:3-1241(+)	1	2.10302e-07	106.11	FVLNEQSK(1)HPDSK	2	-0.43235	1
	TRINITY_DN103789_c5_g2_m.7630	146	K	TRINITY_DN103789_c5_g2|g.7630 ORF TRINITY_DN103789_c5_g2|g.7630 TRINITY_DN103789_c5_g2_m.7630 type:5prime_partial len:413 (+) TRINITY_DN103789_c5_g2:3-1241(+)	1	2.55474e-09	109.47	LIGLAGDTNVQGEEQK(1)K	2	-4.0646	1
	TRINITY_DN103794_c1_g1_m.7639	351	K	TRINITY_DN103794_c1_g1|g.7639 ORF TRINITY_DN103794_c1_g1|g.7639 TRINITY_DN103794_c1_g1_m.7639 type:3prime_partial len:477 (-) TRINITY_DN103794_c1_g1:2-1429(-)	1	0.0175436	47.334	GK(1)VVEWCSQVR	2	1.3895	1
	TRINITY_DN103801_c1_g1_m.7659	94	K	TRINITY_DN103801_c1_g1|g.7659 ORF TRINITY_DN103801_c1_g1|g.7659 TRINITY_DN103801_c1_g1_m.7659 type:5prime_partial len:224 (+) TRINITY_DN103801_c1_g1:3-674(+)	1	7.7939e-05	101.82	PLAVAAAASTK(1)K	2	-0.10429	1
	TRINITY_DN103801_c1_g1_m.7659	167	K	TRINITY_DN103801_c1_g1|g.7659 ORF TRINITY_DN103801_c1_g1|g.7659 TRINITY_DN103801_c1_g1_m.7659 type:5prime_partial len:224 (+) TRINITY_DN103801_c1_g1:3-674(+)	1	0.000136336	90.306	MTHGAPK(1)DNIR	2	-1.8546	2
	TRINITY_DN103819_c1_g2_m.7690	405	K	TRINITY_DN103819_c1_g2|g.7690 ORF TRINITY_DN103819_c1_g2|g.7690 TRINITY_DN103819_c1_g2_m.7690 type:complete len:708 (+) TRINITY_DN103819_c1_g2:178-2301(+)	1	0.0298966	42.229	MDVGK(1)YK	2	3.3166	1
	TRINITY_DN103819_c1_g2_m.7690	508	K	TRINITY_DN103819_c1_g2|g.7690 ORF TRINITY_DN103819_c1_g2|g.7690 TRINITY_DN103819_c1_g2_m.7690 type:complete len:708 (+) TRINITY_DN103819_c1_g2:178-2301(+)	1	4.52122e-06	58.794	HETK(1)VEHLFVIDSSAR	3	-2.7849	1
	TRINITY_DN103828_c6_g1_m.7709	75	K	TRINITY_DN103828_c6_g1|g.7709 ORF TRINITY_DN103828_c6_g1|g.7709 TRINITY_DN103828_c6_g1_m.7709 type:complete len:156 (+) TRINITY_DN103828_c6_g1:149-616(+)	1	0.0595895	47.349	QK(1)PTESSR	2	2.1803	1
	TRINITY_DN103833_c0_g31_m.7717	72	K	TRINITY_DN103833_c0_g31|g.7717 ORF TRINITY_DN103833_c0_g31|g.7717 TRINITY_DN103833_c0_g31_m.7717 type:internal len:224 (+) TRINITY_DN103833_c0_g31:3-671(+)	1	0.0156732	60.892	IMPVQK(1)QTR	2	-2.2761	1
	TRINITY_DN103833_c0_g31_m.7717	61	K	TRINITY_DN103833_c0_g31|g.7717 ORF TRINITY_DN103833_c0_g31|g.7717 TRINITY_DN103833_c0_g31_m.7717 type:internal len:224 (+) TRINITY_DN103833_c0_g31:3-671(+)	1	7.24783e-10	101.52	EHQIVETILGPQLK(1)DEVMK	3	-3.9976	2
	TRINITY_DN103833_c0_g31_m.7717	23	K	TRINITY_DN103833_c0_g31|g.7717 ORF TRINITY_DN103833_c0_g31|g.7717 TRINITY_DN103833_c0_g31_m.7717 type:internal len:224 (+) TRINITY_DN103833_c0_g31:3-671(+)	1	0.00798375	72.492	WVPVTK(1)LGR	2	-3.0966	1
	TRINITY_DN103866_c0_g1_m.7782	310	K	TRINITY_DN103866_c0_g1|g.7782 ORF TRINITY_DN103866_c0_g1|g.7782 TRINITY_DN103866_c0_g1_m.7782 type:complete len:476 (+) TRINITY_DN103866_c0_g1:529-1956(+)	1	2.89276e-05	112.73	AAQQVSK(1)HFYDEK	2	-3.493	1
	TRINITY_DN103943_c2_g2_m.7944	52	K	TRINITY_DN103943_c2_g2|g.7944 ORF TRINITY_DN103943_c2_g2|g.7944 TRINITY_DN103943_c2_g2_m.7944 type:complete len:562 (+) TRINITY_DN103943_c2_g2:155-1840(+)	1	4.60817e-08	112.95	SLVSEK(1)CDVPAEQQR	2	-2.7267	1
	TRINITY_DN103974_c0_g1_m.7997	158	K	TRINITY_DN103974_c0_g1|g.7997 ORF TRINITY_DN103974_c0_g1|g.7997 TRINITY_DN103974_c0_g1_m.7997 type:complete len:1477 (+) TRINITY_DN103974_c0_g1:159-4589(+)	1	0.0275848	72.042	RPDGTK(1)VYK	2	-0.46949	1
	TRINITY_DN103974_c0_g1_m.7997	261	K	TRINITY_DN103974_c0_g1|g.7997 ORF TRINITY_DN103974_c0_g1|g.7997 TRINITY_DN103974_c0_g1_m.7997 type:complete len:1477 (+) TRINITY_DN103974_c0_g1:159-4589(+)	1	0.00238251	53.517	QEK(1)EEYEVAR	2	-1.7831	1
	TRINITY_DN103974_c0_g1_m.7997	296	K	TRINITY_DN103974_c0_g1|g.7997 ORF TRINITY_DN103974_c0_g1|g.7997 TRINITY_DN103974_c0_g1_m.7997 type:complete len:1477 (+) TRINITY_DN103974_c0_g1:159-4589(+)	1	0.00694742	71.219	ATLSNRPETVK(1)EK	2	-1.5559	1
	TRINITY_DN103974_c0_g1_m.7997	767	K	TRINITY_DN103974_c0_g1|g.7997 ORF TRINITY_DN103974_c0_g1|g.7997 TRINITY_DN103974_c0_g1_m.7997 type:complete len:1477 (+) TRINITY_DN103974_c0_g1:159-4589(+)	1	0.0378322	44.57	HDQK(1)EGLLR	2	0.06279	1
	TRINITY_DN103974_c0_g1_m.7997	746	K	TRINITY_DN103974_c0_g1|g.7997 ORF TRINITY_DN103974_c0_g1|g.7997 TRINITY_DN103974_c0_g1_m.7997 type:complete len:1477 (+) TRINITY_DN103974_c0_g1:159-4589(+)	1	0.00188118	52.837	TLNDNGITK(1)ER	2	-2.0329	1
	TRINITY_DN103974_c0_g1_m.7997	895	K	TRINITY_DN103974_c0_g1|g.7997 ORF TRINITY_DN103974_c0_g1|g.7997 TRINITY_DN103974_c0_g1_m.7997 type:complete len:1477 (+) TRINITY_DN103974_c0_g1:159-4589(+)	1	0.000113719	101.48	GYEELNNAEPK(1)K	2	0.39469	1
	TRINITY_DN103986_c1_g1_m.8014	540	K	TRINITY_DN103986_c1_g1|g.8014 ORF TRINITY_DN103986_c1_g1|g.8014 TRINITY_DN103986_c1_g1_m.8014 type:complete len:584 (+) TRINITY_DN103986_c1_g1:93-1844(+)	1	0.0172069	65.12	TPIEGFYLAGDYTK(1)QK	2	0.083142	1
	TRINITY_DN104049_c3_g3_m.8161	28	K	TRINITY_DN104049_c3_g3|g.8161 ORF TRINITY_DN104049_c3_g3|g.8161 TRINITY_DN104049_c3_g3_m.8161 type:complete len:325 (+) TRINITY_DN104049_c3_g3:86-1060(+)	1	0.00199318	69.915	SSHAVAAVGK(1)K	2	-0.66558	1
	TRINITY_DN104049_c3_g3_m.8161	46	K	TRINITY_DN104049_c3_g3|g.8161 ORF TRINITY_DN104049_c3_g3|g.8161 TRINITY_DN104049_c3_g3_m.8161 type:complete len:325 (+) TRINITY_DN104049_c3_g3:86-1060(+)	1	0.00147194	50.641	VPVDNK(1)LHVFDLDQR	3	-3.3237	1
	TRINITY_DN104085_c0_g1_m.8253	62	K	TRINITY_DN104085_c0_g1|g.8253 ORF TRINITY_DN104085_c0_g1|g.8253 TRINITY_DN104085_c0_g1_m.8253 type:internal len:141 (+) TRINITY_DN104085_c0_g1:1-420(+)	1	2.14831e-05	61.503	LSSESEFLNHHIPWEK(1)VTVGK	3	1.1607	1
	TRINITY_DN104085_c0_g2_m.8254	246	K	TRINITY_DN104085_c0_g2|g.8254 ORF TRINITY_DN104085_c0_g2|g.8254 TRINITY_DN104085_c0_g2_m.8254 type:internal len:287 (+) TRINITY_DN104085_c0_g2:3-860(+)	1	1.72713e-05	77.358	EK(1)QYLSAYNDFK	2	0.32404	1
	TRINITY_DN104085_c0_g2_m.8254	156	K	TRINITY_DN104085_c0_g2|g.8254 ORF TRINITY_DN104085_c0_g2|g.8254 TRINITY_DN104085_c0_g2_m.8254 type:internal len:287 (+) TRINITY_DN104085_c0_g2:3-860(+)	1	1.43737e-10	162.21	EVVTSAYK(1)AETK	2	-0.36424	1
	TRINITY_DN104085_c0_g2_m.8254	148	K	TRINITY_DN104085_c0_g2|g.8254 ORF TRINITY_DN104085_c0_g2|g.8254 TRINITY_DN104085_c0_g2_m.8254 type:internal len:287 (+) TRINITY_DN104085_c0_g2:3-860(+)	1	0.00153058	70.195	STFK(1)EVVTSAYK	2	8.3779	1
	TRINITY_DN104085_c0_g2_m.8254	160	K	TRINITY_DN104085_c0_g2|g.8254 ORF TRINITY_DN104085_c0_g2|g.8254 TRINITY_DN104085_c0_g2_m.8254 type:internal len:287 (+) TRINITY_DN104085_c0_g2:3-860(+)	1	0.00149986	96.957	AETK(1)ALDFQAK	2	-1.9392	1
	TRINITY_DN104085_c0_g2_m.8254	167	K	TRINITY_DN104085_c0_g2|g.8254 ORF TRINITY_DN104085_c0_g2|g.8254 TRINITY_DN104085_c0_g2_m.8254 type:internal len:287 (+) TRINITY_DN104085_c0_g2:3-860(+)	1	0.000395136	80.623	ALDFQAK(1)ADDAR	2	1.355	1
	TRINITY_DN104123_c1_g1_m.8333	269	K	TRINITY_DN104123_c1_g1|g.8333 ORF TRINITY_DN104123_c1_g1|g.8333 TRINITY_DN104123_c1_g1_m.8333 type:complete len:424 (+) TRINITY_DN104123_c1_g1:131-1402(+)	1	0.0447937	60.892	FTVLNSK(1)GR	2	-0.20218	1
	TRINITY_DN104123_c1_g1_m.8333	387	K	TRINITY_DN104123_c1_g1|g.8333 ORF TRINITY_DN104123_c1_g1|g.8333 TRINITY_DN104123_c1_g1_m.8333 type:complete len:424 (+) TRINITY_DN104123_c1_g1:131-1402(+)	1	1.93841e-07	83.775	GGPNYQTGLAK(1)MR	2	0.27138	1
	TRINITY_DN104123_c1_g1_m.8333	225	K	TRINITY_DN104123_c1_g1|g.8333 ORF TRINITY_DN104123_c1_g1|g.8333 TRINITY_DN104123_c1_g1_m.8333 type:complete len:424 (+) TRINITY_DN104123_c1_g1:131-1402(+)	1	2.94576e-31	207.88	GELDDTAAFK(1)NFK	2	1.9201	1
	TRINITY_DN104123_c1_g1_m.8333	148	K	TRINITY_DN104123_c1_g1|g.8333 ORF TRINITY_DN104123_c1_g1|g.8333 TRINITY_DN104123_c1_g1_m.8333 type:complete len:424 (+) TRINITY_DN104123_c1_g1:131-1402(+)	1	0.0117022	57.888	VK(1)TVFLPTEK	2	0.39084	1
	TRINITY_DN104123_c1_g1_m.8333	16	K	TRINITY_DN104123_c1_g1|g.8333 ORF TRINITY_DN104123_c1_g1|g.8333 TRINITY_DN104123_c1_g1_m.8333 type:complete len:424 (+) TRINITY_DN104123_c1_g1:131-1402(+)	1	0.0551862	60.589	LLK(1)EHLK	2	0.15202	1
	TRINITY_DN104128_c1_g1_m.8348	112	K	TRINITY_DN104128_c1_g1|g.8348 ORF TRINITY_DN104128_c1_g1|g.8348 TRINITY_DN104128_c1_g1_m.8348 type:complete len:1073 (+) TRINITY_DN104128_c1_g1:257-3475(+)	1	6.2375e-07	105.78	NLVLAGVK(1)SITLHDEGK	2	-0.44911	1
	TRINITY_DN104128_c1_g1_m.8348	941	K	TRINITY_DN104128_c1_g1|g.8348 ORF TRINITY_DN104128_c1_g1|g.8348 TRINITY_DN104128_c1_g1_m.8348 type:complete len:1073 (+) TRINITY_DN104128_c1_g1:257-3475(+)	1	0.000885626	99.174	VLAGGHK(1)LEDYR	2	-2.4223	1
	TRINITY_DN104128_c1_g1_m.8348	477	K	TRINITY_DN104128_c1_g1|g.8348 ORF TRINITY_DN104128_c1_g1|g.8348 TRINITY_DN104128_c1_g1_m.8348 type:complete len:1073 (+) TRINITY_DN104128_c1_g1:257-3475(+)	1	0.0055231	65.879	YDAQISVFGAK(1)LQHK	2	-1.5454	1
	TRINITY_DN104169_c1_g3_m.8429	64	K	TRINITY_DN104169_c1_g3|g.8429 ORF TRINITY_DN104169_c1_g3|g.8429 TRINITY_DN104169_c1_g3_m.8429 type:complete len:197 (+) TRINITY_DN104169_c1_g3:172-762(+)	1	2.06696e-08	163.93	LNANDYENDEALK(1)K	2	-3.2238	1
	TRINITY_DN104176_c8_g1_m.8436	472	K	TRINITY_DN104176_c8_g1|g.8436 ORF TRINITY_DN104176_c8_g1|g.8436 TRINITY_DN104176_c8_g1_m.8436 type:5prime_partial len:512 (+) TRINITY_DN104176_c8_g1:1-1536(+)	1	5.90795e-12	143.22	HLDEK(1)VAALHLGK	2	-0.99238	2
	TRINITY_DN104176_c8_g1_m.8436	308	K	TRINITY_DN104176_c8_g1|g.8436 ORF TRINITY_DN104176_c8_g1|g.8436 TRINITY_DN104176_c8_g1_m.8436 type:5prime_partial len:512 (+) TRINITY_DN104176_c8_g1:1-1536(+)	1	0.000881815	90.306	GCAAALK(1)TAGAR	2	0.31503	1
	TRINITY_DN104176_c8_g1_m.8436	43	K	TRINITY_DN104176_c8_g1|g.8436 ORF TRINITY_DN104176_c8_g1|g.8436 TRINITY_DN104176_c8_g1_m.8436 type:5prime_partial len:512 (+) TRINITY_DN104176_c8_g1:1-1536(+)	1	6.66521e-05	99.174	VK(1)DLSQADFGR	2	-1.6844	1
	TRINITY_DN104208_c0_g7_m.8497	47	K	TRINITY_DN104208_c0_g7|g.8497 ORF TRINITY_DN104208_c0_g7|g.8497 TRINITY_DN104208_c0_g7_m.8497 type:5prime_partial len:466 (+) TRINITY_DN104208_c0_g7:1-1398(+)	1	0.0144745	74.849	EK(1)QQFPISQNK	2	-1.7151	1
	TRINITY_DN104272_c6_g2_m.8627	453	K	TRINITY_DN104272_c6_g2|g.8627 ORF TRINITY_DN104272_c6_g2|g.8627 TRINITY_DN104272_c6_g2_m.8627 type:complete len:468 (+) TRINITY_DN104272_c6_g2:93-1496(+)	1	0.0667436	40.386	SAK(1)LVQGQDR	2	0.22973	1
	TRINITY_DN104272_c6_g2_m.8627	204	K	TRINITY_DN104272_c6_g2|g.8627 ORF TRINITY_DN104272_c6_g2|g.8627 TRINITY_DN104272_c6_g2_m.8627 type:complete len:468 (+) TRINITY_DN104272_c6_g2:93-1496(+)	1	3.36152e-05	110.58	EK(1)GSLLYTSLTDGK	2	0.59623	1
	TRINITY_DN104465_c3_g2_m.9064	3495	K	TRINITY_DN104465_c3_g2|g.9064 ORF TRINITY_DN104465_c3_g2|g.9064 TRINITY_DN104465_c3_g2_m.9064 type:complete len:3667 (+) TRINITY_DN104465_c3_g2:248-11248(+)	1	5.49185e-07	110.58	VTEENK(1)HEYVDR	2	-2.3261	1
	TRINITY_DN104465_c3_g2_m.9064	538	K	TRINITY_DN104465_c3_g2|g.9064 ORF TRINITY_DN104465_c3_g2|g.9064 TRINITY_DN104465_c3_g2_m.9064 type:complete len:3667 (+) TRINITY_DN104465_c3_g2:248-11248(+)	1	0.0158653	50.09	HDDDYLYSQK(1)R	2	0.26205	1
	TRINITY_DN104512_c4_g4_m.9166	42	K	TRINITY_DN104512_c4_g4|g.9166 ORF TRINITY_DN104512_c4_g4|g.9166 TRINITY_DN104512_c4_g4_m.9166 type:5prime_partial len:228 (+) TRINITY_DN104512_c4_g4:3-686(+)	1	1.29423e-09	126.17	YGAQVQGITLSPVQAK(1)R	2	0.18218	1
	TRINITY_DN104656_c0_g7_m.9485	395	K	TRINITY_DN104656_c0_g7|g.9485 ORF TRINITY_DN104656_c0_g7|g.9485 TRINITY_DN104656_c0_g7_m.9485 type:5prime_partial len:412 (+) TRINITY_DN104656_c0_g7:1-1236(+)	1	0.000110059	94.66	MADVEGLEAHK(1)R	2	-1.6858	1
	TRINITY_DN104664_c0_g9_m.9517	116	K	TRINITY_DN104664_c0_g9|g.9517 ORF TRINITY_DN104664_c0_g9|g.9517 TRINITY_DN104664_c0_g9_m.9517 type:5prime_partial len:142 (+) TRINITY_DN104664_c0_g9:3-428(+)	1	0.00285976	74.849	FNEK(1)LAADTR	2	0.56703	1
	TRINITY_DN104664_c0_g9_m.9517	26	K	TRINITY_DN104664_c0_g9|g.9517 ORF TRINITY_DN104664_c0_g9|g.9517 TRINITY_DN104664_c0_g9_m.9517 type:5prime_partial len:142 (+) TRINITY_DN104664_c0_g9:3-428(+)	1	2.77418e-15	124.69	EAGVEHK(1)IDFIESDAVPALDK	3	2.7312	1
	TRINITY_DN104669_c0_g1_m.9525	398	K	TRINITY_DN104669_c0_g1|g.9525 ORF TRINITY_DN104669_c0_g1|g.9525 TRINITY_DN104669_c0_g1_m.9525 type:5prime_partial len:792 (+) TRINITY_DN104669_c0_g1:3-2378(+)	1	3.16574e-39	206.73	ALAGQK(1)DEAFFSANAAAQASR	3	3.33	2
	TRINITY_DN104669_c0_g1_m.9525	53	K	TRINITY_DN104669_c0_g1|g.9525 ORF TRINITY_DN104669_c0_g1|g.9525 TRINITY_DN104669_c0_g1_m.9525 type:5prime_partial len:792 (+) TRINITY_DN104669_c0_g1:3-2378(+)	1	8.84616e-14	120.21	FALESFWDGK(1)STAEDLQK	2	2.6062	1
	TRINITY_DN104669_c0_g1_m.9525	770	K	TRINITY_DN104669_c0_g1|g.9525 ORF TRINITY_DN104669_c0_g1|g.9525 TRINITY_DN104669_c0_g1_m.9525 type:5prime_partial len:792 (+) TRINITY_DN104669_c0_g1:3-2378(+)	1	0.00820695	47.915	YAEVK(1)PALTNMVAAAK	2	0.72403	1
	TRINITY_DN104669_c0_g1_m.9525	347	K	TRINITY_DN104669_c0_g1|g.9525 ORF TRINITY_DN104669_c0_g1|g.9525 TRINITY_DN104669_c0_g1_m.9525 type:5prime_partial len:792 (+) TRINITY_DN104669_c0_g1:3-2378(+)	1	1.63759e-07	85.443	DK(1)LVVSTSSSLLHTAVDLVNETK	3	0.3403	1
	TRINITY_DN104669_c0_g1_m.9525	167	K	TRINITY_DN104669_c0_g1|g.9525 ORF TRINITY_DN104669_c0_g1|g.9525 TRINITY_DN104669_c0_g1_m.9525 type:5prime_partial len:792 (+) TRINITY_DN104669_c0_g1:3-2378(+)	1	0.0134363	83.623	AVSEYK(1)EAK	2	1.2245	1
	TRINITY_DN104669_c0_g1_m.9525	72	K	TRINITY_DN104669_c0_g1|g.9525 ORF TRINITY_DN104669_c0_g1|g.9525 TRINITY_DN104669_c0_g1_m.9525 type:5prime_partial len:792 (+) TRINITY_DN104669_c0_g1:3-2378(+)	1	3.12222e-11	143.22	SSIWK(1)QMADAGIK	2	-1.3976	1
	TRINITY_DN104669_c0_g1_m.9525	494	K	TRINITY_DN104669_c0_g1|g.9525 ORF TRINITY_DN104669_c0_g1|g.9525 TRINITY_DN104669_c0_g1_m.9525 type:5prime_partial len:792 (+) TRINITY_DN104669_c0_g1:3-2378(+)	1	1.36201e-08	128.46	ISEEAYVNAIK(1)EEINK	2	2.4076	2
	TRINITY_DN104669_c0_g1_m.9525	161	K	TRINITY_DN104669_c0_g1|g.9525 ORF TRINITY_DN104669_c0_g1|g.9525 TRINITY_DN104669_c0_g1_m.9525 type:5prime_partial len:792 (+) TRINITY_DN104669_c0_g1:3-2378(+)	1	8.53619e-17	176.97	FSYASHK(1)AVSEYK	2	-1.8248	2
	TRINITY_DN104669_c0_g1_m.9525	426	K	TRINITY_DN104669_c0_g1|g.9525 ORF TRINITY_DN104669_c0_g1|g.9525 TRINITY_DN104669_c0_g1_m.9525 type:5prime_partial len:792 (+) TRINITY_DN104669_c0_g1:3-2378(+)	1	0.000895098	42.061	VTNPEVQK(1)AAAALK	2	-2.7786	1
	TRINITY_DN104669_c0_g1_m.9525	704	K	TRINITY_DN104669_c0_g1|g.9525 ORF TRINITY_DN104669_c0_g1|g.9525 TRINITY_DN104669_c0_g1_m.9525 type:5prime_partial len:792 (+) TRINITY_DN104669_c0_g1:3-2378(+)	1	2.62369e-06	151.22	SDEK(1)LLSVFR	2	-1.0116	1
	TRINITY_DN104669_c0_g1_m.9525	61	K	TRINITY_DN104669_c0_g1|g.9525 ORF TRINITY_DN104669_c0_g1|g.9525 TRINITY_DN104669_c0_g1_m.9525 type:5prime_partial len:792 (+) TRINITY_DN104669_c0_g1:3-2378(+)	1	2.37109e-09	124.06	STAEDLQK(1)VSADLR	2	-1.0037	1
	TRINITY_DN104669_c0_g1_m.9525	374	K	TRINITY_DN104669_c0_g1|g.9525 ORF TRINITY_DN104669_c0_g1|g.9525 TRINITY_DN104669_c0_g1_m.9525 type:5prime_partial len:792 (+) TRINITY_DN104669_c0_g1:3-2378(+)	1	0.0113618	68.548	LDDEIK(1)SWLAFAAQK	3	1.9501	1
	TRINITY_DN104669_c0_g1_m.9525	714	K	TRINITY_DN104669_c0_g1|g.9525 ORF TRINITY_DN104669_c0_g1|g.9525 TRINITY_DN104669_c0_g1_m.9525 type:5prime_partial len:792 (+) TRINITY_DN104669_c0_g1:3-2378(+)	1	1.92384e-05	65.724	EGVK(1)YGAGIGPGVYDIHSPR	3	-3.1046	1
	TRINITY_DN104669_c0_g1_m.9525	451	K	TRINITY_DN104669_c0_g1|g.9525 ORF TRINITY_DN104669_c0_g1|g.9525 TRINITY_DN104669_c0_g1_m.9525 type:5prime_partial len:792 (+) TRINITY_DN104669_c0_g1:3-2378(+)	1	0.00547413	93.561	LDAQQK(1)K	2	-0.57356	1
	TRINITY_DN104669_c0_g1_m.9525	499	K	TRINITY_DN104669_c0_g1|g.9525 ORF TRINITY_DN104669_c0_g1|g.9525 TRINITY_DN104669_c0_g1_m.9525 type:5prime_partial len:792 (+) TRINITY_DN104669_c0_g1:3-2378(+)	1	0.00330333	89.123	EEINK(1)VVK	2	0.22477	1
	TRINITY_DN104669_c0_g1_m.9525	432	K	TRINITY_DN104669_c0_g1|g.9525 ORF TRINITY_DN104669_c0_g1|g.9525 TRINITY_DN104669_c0_g1_m.9525 type:5prime_partial len:792 (+) TRINITY_DN104669_c0_g1:3-2378(+)	1	8.22144e-11	183	AAAALK(1)GSDHR	2	0.47642	1
	TRINITY_DN104669_c0_g1_m.9525	781	K	TRINITY_DN104669_c0_g1|g.9525 ORF TRINITY_DN104669_c0_g1|g.9525 TRINITY_DN104669_c0_g1_m.9525 type:5prime_partial len:792 (+) TRINITY_DN104669_c0_g1:3-2378(+)	1	1.06243e-09	131.54	PALTNMVAAAK(1)QLR	2	0.3283	2
	TRINITY_DN104794_c8_g2_m.9785	6	K	TRINITY_DN104794_c8_g2|g.9785 ORF TRINITY_DN104794_c8_g2|g.9785 TRINITY_DN104794_c8_g2_m.9785 type:complete len:320 (+) TRINITY_DN104794_c8_g2:268-1227(+)	1	5.41916e-08	131.54	VDLGK(1)IEHSHLPIR	3	-4.4655	3
	TRINITY_DN104794_c8_g2_m.9785	109	K	TRINITY_DN104794_c8_g2|g.9785 ORF TRINITY_DN104794_c8_g2|g.9785 TRINITY_DN104794_c8_g2_m.9785 type:complete len:320 (+) TRINITY_DN104794_c8_g2:268-1227(+)	1	0.000161139	88.42	AFLISK(1)DFGAFPAYHFAIR	3	0.73894	1
	TRINITY_DN104794_c8_g2_m.9785	173	K	TRINITY_DN104794_c8_g2|g.9785 ORF TRINITY_DN104794_c8_g2|g.9785 TRINITY_DN104794_c8_g2_m.9785 type:complete len:320 (+) TRINITY_DN104794_c8_g2:268-1227(+)	1	0.0129431	84.368	YDAK(1)TVVR	2	-0.37549	1
	TRINITY_DN104794_c8_g2_m.9785	282	K	TRINITY_DN104794_c8_g2|g.9785 ORF TRINITY_DN104794_c8_g2|g.9785 TRINITY_DN104794_c8_g2_m.9785 type:complete len:320 (+) TRINITY_DN104794_c8_g2:268-1227(+)	1	0.0631575	52.591	K(1)FIPNLELK	2	0.12091	1
	TRINITY_DN104794_c8_g2_m.9785	267	K	TRINITY_DN104794_c8_g2|g.9785 ORF TRINITY_DN104794_c8_g2|g.9785 TRINITY_DN104794_c8_g2_m.9785 type:complete len:320 (+) TRINITY_DN104794_c8_g2:268-1227(+)	1	0.0125464	44.82	DYVIK(1)FPGIGEYVR	2	-3.7233	1
	TRINITY_DN104794_c8_g2_m.9785	316	K	TRINITY_DN104794_c8_g2|g.9785 ORF TRINITY_DN104794_c8_g2|g.9785 TRINITY_DN104794_c8_g2_m.9785 type:complete len:320 (+) TRINITY_DN104794_c8_g2:268-1227(+)	1	2.47702e-05	48.945	FLPEGSHFVHEQNPEEVNELILDFLK(1)R	4	1.3526	1
	TRINITY_DN104822_c1_g3_m.9885	127	K	TRINITY_DN104822_c1_g3|g.9885 ORF TRINITY_DN104822_c1_g3|g.9885 TRINITY_DN104822_c1_g3_m.9885 type:complete len:228 (+) TRINITY_DN104822_c1_g3:1473-2156(+)	1	2.59703e-08	153.25	ALEATNMSK(1)LVDR	2	0.73577	1
	TRINITY_DN104822_c1_g3_m.9885	95	K	TRINITY_DN104822_c1_g3|g.9885 ORF TRINITY_DN104822_c1_g3|g.9885 TRINITY_DN104822_c1_g3_m.9885 type:complete len:228 (+) TRINITY_DN104822_c1_g3:1473-2156(+)	1	0.0597989	50.834	HFEPYGK(1)LVNVR	2	0.21206	1
	TRINITY_DN104872_c1_g1_m.10030	307	K	TRINITY_DN104872_c1_g1|g.10030 ORF TRINITY_DN104872_c1_g1|g.10030 TRINITY_DN104872_c1_g1_m.10030 type:complete len:312 (+) TRINITY_DN104872_c1_g1:64-999(+)	1	0.0077708	61.48	VVAEIQK(1)AFR	2	-2.6329	1
	TRINITY_DN104872_c1_g1_m.10030	223	K	TRINITY_DN104872_c1_g1|g.10030 ORF TRINITY_DN104872_c1_g1|g.10030 TRINITY_DN104872_c1_g1_m.10030 type:complete len:312 (+) TRINITY_DN104872_c1_g1:64-999(+)	1	0.00322157	47.844	SVLSPTAVAVTVDCGK(1)EGDVK	2	-1.0033	1
	TRINITY_DN104929_c0_g1_m.10154	428	K	TRINITY_DN104929_c0_g1|g.10154 ORF TRINITY_DN104929_c0_g1|g.10154 TRINITY_DN104929_c0_g1_m.10154 type:3prime_partial len:437 (+) TRINITY_DN104929_c0_g1:221-1528(+)	1	0.000114225	119.07	FVGPDGAK(1)LLR	2	-0.32798	1
	TRINITY_DN104929_c0_g1_m.10154	118	K	TRINITY_DN104929_c0_g1|g.10154 ORF TRINITY_DN104929_c0_g1|g.10154 TRINITY_DN104929_c0_g1_m.10154 type:3prime_partial len:437 (+) TRINITY_DN104929_c0_g1:221-1528(+)	1	1.9173e-13	104.86	DVFTGTYMPSTK(1)LTGGYR	2	-0.23088	1
	TRINITY_DN104929_c0_g1_m.10154	138	K	TRINITY_DN104929_c0_g1|g.10154 ORF TRINITY_DN104929_c0_g1|g.10154 TRINITY_DN104929_c0_g1_m.10154 type:3prime_partial len:437 (+) TRINITY_DN104929_c0_g1:221-1528(+)	1	5.6771e-13	137.58	VCSYLDPSEPSHTK(1)VK	2	-3.7419	2
	TRINITY_DN104929_c0_g1_m.10154	213	K	TRINITY_DN104929_c0_g1|g.10154 ORF TRINITY_DN104929_c0_g1|g.10154 TRINITY_DN104929_c0_g1_m.10154 type:3prime_partial len:437 (+) TRINITY_DN104929_c0_g1:221-1528(+)	1	2.07368e-31	220.17	SPSDVGAAGLQK(1)K	2	-0.73554	1
	TRINITY_DN104929_c0_g1_m.10154	102	K	TRINITY_DN104929_c0_g1|g.10154 ORF TRINITY_DN104929_c0_g1|g.10154 TRINITY_DN104929_c0_g1_m.10154 type:3prime_partial len:437 (+) TRINITY_DN104929_c0_g1:221-1528(+)	1	0.0011184	75.474	SFPILFDTSK(1)VEK	2	-0.53939	1
	TRINITY_DN104929_c0_g1_m.10154	51	K	TRINITY_DN104929_c0_g1|g.10154 ORF TRINITY_DN104929_c0_g1|g.10154 TRINITY_DN104929_c0_g1_m.10154 type:3prime_partial len:437 (+) TRINITY_DN104929_c0_g1:221-1528(+)	1	0.00122804	106	LDYYYFK(1)GHDK	2	-2.6225	1
	TRINITY_DN104929_c0_g1_m.10154	92	K	TRINITY_DN104929_c0_g1|g.10154 ORF TRINITY_DN104929_c0_g1|g.10154 TRINITY_DN104929_c0_g1_m.10154 type:3prime_partial len:437 (+) TRINITY_DN104929_c0_g1:221-1528(+)	1	2.72983e-06	70.552	VIAVLDAK(1)SFPILFDTSK	2	3.8792	1
	TRINITY_DN104929_c0_g1_m.10154	60	K	TRINITY_DN104929_c0_g1|g.10154 ORF TRINITY_DN104929_c0_g1|g.10154 TRINITY_DN104929_c0_g1_m.10154 type:3prime_partial len:437 (+) TRINITY_DN104929_c0_g1:221-1528(+)	1	4.21509e-34	194.83	FFQSK(1)IDQYSSTVFR	2	3.9016	1
	TRINITY_DN104929_c0_g1_m.10154	375	K	TRINITY_DN104929_c0_g1|g.10154 ORF TRINITY_DN104929_c0_g1|g.10154 TRINITY_DN104929_c0_g1_m.10154 type:3prime_partial len:437 (+) TRINITY_DN104929_c0_g1:221-1528(+)	1	0.000270765	86.243	IDPPVEFQYAHAK(1)K	2	-3.5774	1
	TRINITY_DN104929_c0_g1_m.10154	201	K	TRINITY_DN104929_c0_g1|g.10154 ORF TRINITY_DN104929_c0_g1|g.10154 TRINITY_DN104929_c0_g1_m.10154 type:3prime_partial len:437 (+) TRINITY_DN104929_c0_g1:221-1528(+)	1	0.00013035	109.47	AYFGK(1)SPSDVGAAGLQK	2	-4.1382	1
	TRINITY_DN104929_c0_g1_m.10154	376	K	TRINITY_DN104929_c0_g1|g.10154 ORF TRINITY_DN104929_c0_g1|g.10154 TRINITY_DN104929_c0_g1_m.10154 type:3prime_partial len:437 (+) TRINITY_DN104929_c0_g1:221-1528(+)	1	1.03458e-12	128.46	K(1)DFLLQSHDAQFQVR	3	-3.0167	1
	TRINITY_DN104929_c0_g1_m.10154	256	K	TRINITY_DN104929_c0_g1|g.10154 ORF TRINITY_DN104929_c0_g1|g.10154 TRINITY_DN104929_c0_g1_m.10154 type:3prime_partial len:437 (+) TRINITY_DN104929_c0_g1:221-1528(+)	1	0.000894829	63.947	LVEDFLLHTFALPSFIAK(1)PGYK	3	1.122	1
	TRINITY_DN104929_c0_g1_m.10154	151	K	TRINITY_DN104929_c0_g1|g.10154 ORF TRINITY_DN104929_c0_g1|g.10154 TRINITY_DN104929_c0_g1_m.10154 type:3prime_partial len:437 (+) TRINITY_DN104929_c0_g1:221-1528(+)	1	0.0060762	76.605	K(1)DYFLPAFR	2	0.36491	1
	TRINITY_DN104929_c0_g1_m.10154	148	K	TRINITY_DN104929_c0_g1|g.10154 ORF TRINITY_DN104929_c0_g1|g.10154 TRINITY_DN104929_c0_g1_m.10154 type:3prime_partial len:437 (+) TRINITY_DN104929_c0_g1:221-1528(+)	1	2.70389e-06	154.81	QFLFNLLK(1)SR	2	0.32449	1
	TRINITY_DN104929_c0_g1_m.10154	140	K	TRINITY_DN104929_c0_g1|g.10154 ORF TRINITY_DN104929_c0_g1|g.10154 TRINITY_DN104929_c0_g1_m.10154 type:3prime_partial len:437 (+) TRINITY_DN104929_c0_g1:221-1528(+)	1	5.41138e-09	158.61	VK(1)QFLFNLLK	2	1.6929	1
	TRINITY_DN104929_c0_g1_m.10154	55	K	TRINITY_DN104929_c0_g1|g.10154 ORF TRINITY_DN104929_c0_g1|g.10154 TRINITY_DN104929_c0_g1_m.10154 type:3prime_partial len:437 (+) TRINITY_DN104929_c0_g1:221-1528(+)	1	0.0101437	83.358	GHDK(1)FFQSK	2	1.0644	1
	TRINITY_DN105095_c0_g1_m.10527	121	K	TRINITY_DN105095_c0_g1|g.10527 ORF TRINITY_DN105095_c0_g1|g.10527 TRINITY_DN105095_c0_g1_m.10527 type:5prime_partial len:476 (+) TRINITY_DN105095_c0_g1:1-1428(+)	1	3.6691e-06	76.255	NFFK(1)VTTTDDPVIR	2	-2.7591	1
	TRINITY_DN105158_c25_g1_m.10689	169	K	TRINITY_DN105158_c25_g1|g.10689 ORF TRINITY_DN105158_c25_g1|g.10689 TRINITY_DN105158_c25_g1_m.10689 type:complete len:324 (+) TRINITY_DN105158_c25_g1:248-1219(+)	1	0.00314375	97.033	LK(1)QQGSR	2	0.32138	1
	TRINITY_DN105158_c25_g1_m.10689	65	K	TRINITY_DN105158_c25_g1|g.10689 ORF TRINITY_DN105158_c25_g1|g.10689 TRINITY_DN105158_c25_g1_m.10689 type:complete len:324 (+) TRINITY_DN105158_c25_g1:248-1219(+)	1	4.14331e-27	180.11	ASEQQGK(1)VQEDEVVDSK	2	-4.3793	1
	TRINITY_DN105430_c5_g1_m.11282	434	K	TRINITY_DN105430_c5_g1|g.11282 ORF TRINITY_DN105430_c5_g1|g.11282 TRINITY_DN105430_c5_g1_m.11282 type:5prime_partial len:514 (+) TRINITY_DN105430_c5_g1:3-1544(+)	1	0.0195937	56.091	FIGEEGK(1)R	2	1.2591	1
	TRINITY_DN105430_c5_g1_m.11282	53	K	TRINITY_DN105430_c5_g1|g.11282 ORF TRINITY_DN105430_c5_g1|g.11282 TRINITY_DN105430_c5_g1_m.11282 type:5prime_partial len:514 (+) TRINITY_DN105430_c5_g1:3-1544(+)	1	0.0547447	40.83	SIPGSYGFPLLGPLK(1)DR	2	1.8626	1
	TRINITY_DN105430_c5_g1_m.11282	347	K	TRINITY_DN105430_c5_g1|g.11282 ORF TRINITY_DN105430_c5_g1|g.11282 TRINITY_DN105430_c5_g1_m.11282 type:5prime_partial len:514 (+) TRINITY_DN105430_c5_g1:3-1544(+)	1	0.000169428	76.255	SEK(1)GVVGFEELK	2	1.8779	1
	TRINITY_DN105430_c5_g1_m.11282	76	K	TRINITY_DN105430_c5_g1|g.11282 ORF TRINITY_DN105430_c5_g1|g.11282 TRINITY_DN105430_c5_g1_m.11282 type:5prime_partial len:514 (+) TRINITY_DN105430_c5_g1:3-1544(+)	1	0.007112	78.932	MEAHK(1)SPVFR	2	-0.47133	1
	TRINITY_DN105491_c1_g2_m.11433	183	K	TRINITY_DN105491_c1_g2|g.11433 ORF TRINITY_DN105491_c1_g2|g.11433 TRINITY_DN105491_c1_g2_m.11433 type:complete len:213 (+) TRINITY_DN105491_c1_g2:67-705(+)	1	0.000237143	64.21	GLADFTQK(1)LNSAVTDLEK	2	4.5002	1
	TRINITY_DN105607_c0_g13_m.11654	59	K	TRINITY_DN105607_c0_g13|g.11654 ORF TRINITY_DN105607_c0_g13|g.11654 TRINITY_DN105607_c0_g13_m.11654 type:internal len:133 (+) TRINITY_DN105607_c0_g13:2-397(+)	1	1.59172e-06	158.57	ETDLSQEK(1)TR	2	1.0139	1
	TRINITY_DN105607_c0_g15_m.11655	92	K	TRINITY_DN105607_c0_g15|g.11655 ORF TRINITY_DN105607_c0_g15|g.11655 TRINITY_DN105607_c0_g15_m.11655 type:5prime_partial len:126 (+) TRINITY_DN105607_c0_g15:2-379(+)	1	0.0336252	51.864	NLK(1)QSLER	2	-0.23497	1
	TRINITY_DN105607_c0_g7_m.11659	182	K	TRINITY_DN105607_c0_g7|g.11659 ORF TRINITY_DN105607_c0_g7|g.11659 TRINITY_DN105607_c0_g7_m.11659 type:internal len:614 (+) TRINITY_DN105607_c0_g7:1-1839(+)	1	0.00680615	50.314	TLDLYK(1)EYFAVPYPLPK	2	2.1885	1
	TRINITY_DN105607_c0_g7_m.11659	354	K	TRINITY_DN105607_c0_g7|g.11659 ORF TRINITY_DN105607_c0_g7|g.11659 TRINITY_DN105607_c0_g7_m.11659 type:internal len:614 (+) TRINITY_DN105607_c0_g7:1-1839(+)	1	0.000487506	117.18	SLASYVK(1)R	2	0.14734	1
	TRINITY_DN105607_c0_g7_m.11659	499	K	TRINITY_DN105607_c0_g7|g.11659 ORF TRINITY_DN105607_c0_g7|g.11659 TRINITY_DN105607_c0_g7_m.11659 type:internal len:614 (+) TRINITY_DN105607_c0_g7:1-1839(+)	1	0.0176575	68.548	YAIENNK(1)LSATDR	2	-4.9822	1
	TRINITY_DN105607_c0_g7_m.11659	232	K	TRINITY_DN105607_c0_g7|g.11659 ORF TRINITY_DN105607_c0_g7|g.11659 TRINITY_DN105607_c0_g7_m.11659 type:internal len:614 (+) TRINITY_DN105607_c0_g7:1-1839(+)	1	0.00683396	67.464	HSAAANK(1)QR	2	-0.48344	1
	TRINITY_DN105607_c0_g7_m.11659	587	K	TRINITY_DN105607_c0_g7|g.11659 ORF TRINITY_DN105607_c0_g7|g.11659 TRINITY_DN105607_c0_g7_m.11659 type:internal len:614 (+) TRINITY_DN105607_c0_g7:1-1839(+)	1	0.000489533	46.206	LGWDPK(1)EGESHLDAMLR	3	-3.938	1
	TRINITY_DN105784_c0_g1_m.12019	379	K	TRINITY_DN105784_c0_g1|g.12019 ORF TRINITY_DN105784_c0_g1|g.12019 TRINITY_DN105784_c0_g1_m.12019 type:complete len:498 (+) TRINITY_DN105784_c0_g1:357-1850(+)	1	6.21943e-08	110.58	LK(1)DILGISNTSFK	2	0.22251	1
	TRINITY_DN105877_c16_g1_m.12207	52	K	TRINITY_DN105877_c16_g1|g.12207 ORF TRINITY_DN105877_c16_g1|g.12207 TRINITY_DN105877_c16_g1_m.12207 type:internal len:424 (+) TRINITY_DN105877_c16_g1:2-1270(+)	1	3.63109e-22	199.4	GNDLQAVALK(1)FR	2	-2.8443	1
	TRINITY_DN105877_c16_g1_m.12207	131	K	TRINITY_DN105877_c16_g1|g.12207 ORF TRINITY_DN105877_c16_g1|g.12207 TRINITY_DN105877_c16_g1_m.12207 type:internal len:424 (+) TRINITY_DN105877_c16_g1:2-1270(+)	1	3.22162e-22	110.99	HHLQTLLNEDQLDSALK(1)ILISHTLELPSHR	4	0.27806	1
	TRINITY_DN105877_c16_g1_m.12207	77	K	TRINITY_DN105877_c16_g1|g.12207 ORF TRINITY_DN105877_c16_g1|g.12207 TRINITY_DN105877_c16_g1_m.12207 type:internal len:424 (+) TRINITY_DN105877_c16_g1:2-1270(+)	1	0.00825951	78.932	YKDDEGK(1)FK	2	0.46852	1
	TRINITY_DN105877_c16_g1_m.12207	302	K	TRINITY_DN105877_c16_g1|g.12207 ORF TRINITY_DN105877_c16_g1|g.12207 TRINITY_DN105877_c16_g1_m.12207 type:internal len:424 (+) TRINITY_DN105877_c16_g1:2-1270(+)	1	8.52954e-05	72.031	TLQDFNNELTSHGK(1)SYR	2	-2.4028	2
	TRINITY_DN105877_c16_g1_m.12207	72	K	TRINITY_DN105877_c16_g1|g.12207 ORF TRINITY_DN105877_c16_g1|g.12207 TRINITY_DN105877_c16_g1_m.12207 type:internal len:424 (+) TRINITY_DN105877_c16_g1:2-1270(+)	1	0.0304368	65.313	YK(1)DDEGK	2	2.2006	1
	TRINITY_DN105877_c16_g1_m.12207	280	K	TRINITY_DN105877_c16_g1|g.12207 ORF TRINITY_DN105877_c16_g1|g.12207 TRINITY_DN105877_c16_g1_m.12207 type:internal len:424 (+) TRINITY_DN105877_c16_g1:2-1270(+)	1	0.00346256	46.447	EYLK(1)IHFQNFNK	3	-2.2909	1
	TRINITY_DN105877_c16_g1_m.12207	399	K	TRINITY_DN105877_c16_g1|g.12207 ORF TRINITY_DN105877_c16_g1|g.12207 TRINITY_DN105877_c16_g1_m.12207 type:internal len:424 (+) TRINITY_DN105877_c16_g1:2-1270(+)	1	0.000784743	63.908	MRDDVVSHEFEQK(1)R	3	-0.020089	2
	TRINITY_DN105881_c0_g1_m.12216	77	K	TRINITY_DN105881_c0_g1|g.12216 ORF TRINITY_DN105881_c0_g1|g.12216 TRINITY_DN105881_c0_g1_m.12216 type:complete len:237 (+) TRINITY_DN105881_c0_g1:9224-9934(+)	1	0.0133226	51.43	FLIVGTK(1)K	2	-3.1246	1
	TRINITY_DN105911_c8_g2_m.12314	253	K	TRINITY_DN105911_c8_g2|g.12314 ORF TRINITY_DN105911_c8_g2|g.12314 TRINITY_DN105911_c8_g2_m.12314 type:complete len:322 (+) TRINITY_DN105911_c8_g2:204-1169(+)	1	3.77696e-08	95.345	GGENIK(1)NMQATTGAR	2	-2.6271	1
	TRINITY_DN105911_c8_g2_m.12314	247	K	TRINITY_DN105911_c8_g2|g.12314 ORF TRINITY_DN105911_c8_g2|g.12314 TRINITY_DN105911_c8_g2_m.12314 type:complete len:322 (+) TRINITY_DN105911_c8_g2:204-1169(+)	1	0.0097301	61.577	VGLIIGK(1)GGENIK	2	-0.20859	1
	TRINITY_DN105985_c12_g6_m.12448	334	K	TRINITY_DN105985_c12_g6|g.12448 ORF TRINITY_DN105985_c12_g6|g.12448 TRINITY_DN105985_c12_g6_m.12448 type:3prime_partial len:408 (+) TRINITY_DN105985_c12_g6:141-1361(+)	1	0.0737443	40.502	NLQTK(1)TGAR	2	0.30639	1
	TRINITY_DN106262_c0_g1_m.12661	109	K	TRINITY_DN106262_c0_g1|g.12661 ORF TRINITY_DN106262_c0_g1|g.12661 TRINITY_DN106262_c0_g1_m.12661 type:complete len:147 (+) TRINITY_DN106262_c0_g1:110-550(+)	1	0.0150607	69.905	EVK(1)DIFIR	2	-0.75011	1
	TRINITY_DN106262_c0_g1_m.12661	50	K	TRINITY_DN106262_c0_g1|g.12661 ORF TRINITY_DN106262_c0_g1|g.12661 TRINITY_DN106262_c0_g1_m.12661 type:complete len:147 (+) TRINITY_DN106262_c0_g1:110-550(+)	1	4.96915e-06	98.865	YK(1)AFEPILLAGVER	2	1.0321	1
	TRINITY_DN106262_c0_g1_m.12661	77	K	TRINITY_DN106262_c0_g1|g.12661 ORF TRINITY_DN106262_c0_g1|g.12661 TRINITY_DN106262_c0_g1_m.12661 type:complete len:147 (+) TRINITY_DN106262_c0_g1:110-550(+)	1	0.000783039	101.48	GGGK(1)TSQIYAIR	2	-2.239	1
	TRINITY_DN106262_c0_g1_m.12661	26	K	TRINITY_DN106262_c0_g1|g.12661 ORF TRINITY_DN106262_c0_g1|g.12661 TRINITY_DN106262_c0_g1_m.12661 type:complete len:147 (+) TRINITY_DN106262_c0_g1:110-550(+)	1	0.00157629	79.311	TAVAVTHCK(1)AGK	2	-1.991	1
	TRINITY_DN106508_c0_g1_m.12680	92	K	TRINITY_DN106508_c0_g1|g.12680 ORF TRINITY_DN106508_c0_g1|g.12680 TRINITY_DN106508_c0_g1_m.12680 type:complete len:385 (+) TRINITY_DN106508_c0_g1:156-1310(+)	0.999962	3.73644e-06	52.149	LKDFIHISDFDK(1)ETIMR	3	-0.53278	1
	TRINITY_DN106508_c0_g1_m.12680	282	K	TRINITY_DN106508_c0_g1|g.12680 ORF TRINITY_DN106508_c0_g1|g.12680 TRINITY_DN106508_c0_g1_m.12680 type:complete len:385 (+) TRINITY_DN106508_c0_g1:156-1310(+)	1	0.000121027	110.58	SAGISK(1)IVLTDNPR	2	0.17187	1
	TRINITY_DN106508_c0_g1_m.12680	101	K	TRINITY_DN106508_c0_g1|g.12680 ORF TRINITY_DN106508_c0_g1|g.12680 TRINITY_DN106508_c0_g1_m.12680 type:complete len:385 (+) TRINITY_DN106508_c0_g1:156-1310(+)	1	0.0182808	60.892	ILQK(1)ASEVK	2	-1.2763	1
	TRINITY_DN10790_c0_g1_m.12825	70	K	TRINITY_DN10790_c0_g1|g.12825 ORF TRINITY_DN10790_c0_g1|g.12825 TRINITY_DN10790_c0_g1_m.12825 type:3prime_partial len:165 (+) TRINITY_DN10790_c0_g1:77-568(+)	1	0.00227201	41.317	NQVAMNPANTVFDAK(1)R	2	-1.7042	1
	TRINITY_DN116059_c0_g1_m.13447	97	K	TRINITY_DN116059_c0_g1|g.13447 ORF TRINITY_DN116059_c0_g1|g.13447 TRINITY_DN116059_c0_g1_m.13447 type:internal len:125 (+) TRINITY_DN116059_c0_g1:1-372(+)	1	0.00703192	43.306	ILYGGSVNEK(1)NCGELSK	2	-2.6908	1
	TRINITY_DN128853_c0_g1_m.14381	127	K	TRINITY_DN128853_c0_g1|g.14381 ORF TRINITY_DN128853_c0_g1|g.14381 TRINITY_DN128853_c0_g1_m.14381 type:complete len:174 (+) TRINITY_DN128853_c0_g1:184-705(+)	1	3.56774e-13	181.87	LEK(1)EIAEVQELK	2	3.9652	1
	TRINITY_DN128853_c0_g1_m.14381	120	K	TRINITY_DN128853_c0_g1|g.14381 ORF TRINITY_DN128853_c0_g1|g.14381 TRINITY_DN128853_c0_g1_m.14381 type:complete len:174 (+) TRINITY_DN128853_c0_g1:184-705(+)	1	0.000885626	73.655	EAEQTSLK(1)ETER	2	-0.9957	1
	TRINITY_DN128853_c0_g1_m.14381	138	K	TRINITY_DN128853_c0_g1|g.14381 ORF TRINITY_DN128853_c0_g1|g.14381 TRINITY_DN128853_c0_g1_m.14381 type:complete len:174 (+) TRINITY_DN128853_c0_g1:184-705(+)	1	0.000921742	67.548	QK(1)ICTMTAEEYFQK	2	-2.407	1
	TRINITY_DN128853_c0_g1_m.14381	15	K	TRINITY_DN128853_c0_g1|g.14381 ORF TRINITY_DN128853_c0_g1|g.14381 TRINITY_DN128853_c0_g1_m.14381 type:complete len:174 (+) TRINITY_DN128853_c0_g1:184-705(+)	1	0.0056847	78.864	VVETAVK(1)ATK	2	-0.65697	2
	TRINITY_DN128853_c0_g1_m.14381	81	K	TRINITY_DN128853_c0_g1|g.14381 ORF TRINITY_DN128853_c0_g1|g.14381 TRINITY_DN128853_c0_g1_m.14381 type:complete len:174 (+) TRINITY_DN128853_c0_g1:184-705(+)	1	9.20543e-06	66.509	LVDMYK(1)EAYESVEIPK	2	-2.2957	1
	TRINITY_DN128853_c0_g1_m.14381	103	K	TRINITY_DN128853_c0_g1|g.14381 ORF TRINITY_DN128853_c0_g1|g.14381 TRINITY_DN128853_c0_g1_m.14381 type:complete len:174 (+) TRINITY_DN128853_c0_g1:184-705(+)	1	2.44822e-06	115.04	PK(1)FDALLVELK	2	1.259	1
	TRINITY_DN128853_c0_g1_m.14381	18	K	TRINITY_DN128853_c0_g1|g.14381 ORF TRINITY_DN128853_c0_g1|g.14381 TRINITY_DN128853_c0_g1_m.14381 type:complete len:174 (+) TRINITY_DN128853_c0_g1:184-705(+)	1	0.000884326	97.594	ATK(1)AIDWDGMAK	2	-1.2561	2
	TRINITY_DN128853_c0_g1_m.14381	101	K	TRINITY_DN128853_c0_g1|g.14381 ORF TRINITY_DN128853_c0_g1|g.14381 TRINITY_DN128853_c0_g1_m.14381 type:complete len:174 (+) TRINITY_DN128853_c0_g1:184-705(+)	1	2.34022e-15	171.34	FVDTVTPQYK(1)PK	2	-0.91039	1
	TRINITY_DN128853_c0_g1_m.14381	157	K	TRINITY_DN128853_c0_g1|g.14381 ORF TRINITY_DN128853_c0_g1|g.14381 TRINITY_DN128853_c0_g1_m.14381 type:complete len:174 (+) TRINITY_DN128853_c0_g1:184-705(+)	1	0.00738423	87.251	QK(1)FDDEIR	2	0.8701	1
	TRINITY_DN34687_c0_g1_m.15911	30	K	TRINITY_DN34687_c0_g1|g.15911 ORF TRINITY_DN34687_c0_g1|g.15911 TRINITY_DN34687_c0_g1_m.15911 type:5prime_partial len:100 (-) TRINITY_DN34687_c0_g1:90-389(-)	1	0.00404971	98.009	ENVAK(1)QGLPK	2	-0.0043049	1
	TRINITY_DN42304_c0_g1_m.16189	278	K	TRINITY_DN42304_c0_g1|g.16189 ORF TRINITY_DN42304_c0_g1|g.16189 TRINITY_DN42304_c0_g1_m.16189 type:complete len:382 (+) TRINITY_DN42304_c0_g1:251-1396(+)	1	1.29942e-05	89.636	IIPGYGGGMSSAK(1)AALESDTR	2	1.787	1
	TRINITY_DN42304_c0_g1_m.16189	314	K	TRINITY_DN42304_c0_g1|g.16189 ORF TRINITY_DN42304_c0_g1|g.16189 TRINITY_DN42304_c0_g1_m.16189 type:complete len:382 (+) TRINITY_DN42304_c0_g1:251-1396(+)	1	0.00736383	60.547	AAK(1)AIGFIEK	2	-2.7021	1
	TRINITY_DN51048_c0_g1_m.16604	353	K	TRINITY_DN51048_c0_g1|g.16604 ORF TRINITY_DN51048_c0_g1|g.16604 TRINITY_DN51048_c0_g1_m.16604 type:complete len:391 (+) TRINITY_DN51048_c0_g1:429-1601(+)	1	7.12307e-13	123.99	GQPENVETAQK(1)ALLIR	2	-1.9436	1
	TRINITY_DN51048_c0_g1_m.16604	272	K	TRINITY_DN51048_c0_g1|g.16604 ORF TRINITY_DN51048_c0_g1|g.16604 TRINITY_DN51048_c0_g1_m.16604 type:complete len:391 (+) TRINITY_DN51048_c0_g1:429-1601(+)	1	0.00505966	78.932	EK(1)ASPETIAK	2	0.35642	1
	TRINITY_DN51048_c0_g1_m.16604	360	K	TRINITY_DN51048_c0_g1|g.16604 ORF TRINITY_DN51048_c0_g1|g.16604 TRINITY_DN51048_c0_g1_m.16604 type:complete len:391 (+) TRINITY_DN51048_c0_g1:429-1601(+)	1	0.00090116	81.163	AK(1)ANSMAQLGR	2	1.5666	2
	TRINITY_DN51048_c0_g1_m.16604	342	K	TRINITY_DN51048_c0_g1|g.16604 ORF TRINITY_DN51048_c0_g1|g.16604 TRINITY_DN51048_c0_g1_m.16604 type:complete len:391 (+) TRINITY_DN51048_c0_g1:429-1601(+)	1	5.54993e-17	145.08	TWK(1)GQPENVETAQK	2	-2.0245	1
	TRINITY_DN51048_c0_g1_m.16604	287	K	TRINITY_DN51048_c0_g1|g.16604 ORF TRINITY_DN51048_c0_g1|g.16604 TRINITY_DN51048_c0_g1_m.16604 type:complete len:391 (+) TRINITY_DN51048_c0_g1:429-1601(+)	1	0.02513	58.286	YTLTMLK(1)R	2	-2.8574	1
	TRINITY_DN51048_c0_g1_m.16604	380	K	TRINITY_DN51048_c0_g1|g.16604 ORF TRINITY_DN51048_c0_g1|g.16604 TRINITY_DN51048_c0_g1_m.16604 type:complete len:391 (+) TRINITY_DN51048_c0_g1:429-1601(+)	1	4.05093e-10	156.14	YSAEGENEEAK(1)K	2	-1.0104	1
	TRINITY_DN52453_c0_g1_m.16720	79	K	TRINITY_DN52453_c0_g1|g.16720 ORF TRINITY_DN52453_c0_g1|g.16720 TRINITY_DN52453_c0_g1_m.16720 type:internal len:101 (+) TRINITY_DN52453_c0_g1:2-301(+)	1	0.00318615	72.038	GEELEETK(1)K	2	0.18648	2
	TRINITY_DN53129_c0_g1_m.16760	72	K	TRINITY_DN53129_c0_g1|g.16760 ORF TRINITY_DN53129_c0_g1|g.16760 TRINITY_DN53129_c0_g1_m.16760 type:5prime_partial len:136 (+) TRINITY_DN53129_c0_g1:2-409(+)	1	0.00204859	86.205	NFQK(1)VDPSK	2	0.55902	1
	TRINITY_DN53129_c0_g1_m.16760	56	K	TRINITY_DN53129_c0_g1|g.16760 ORF TRINITY_DN53129_c0_g1|g.16760 TRINITY_DN53129_c0_g1_m.16760 type:5prime_partial len:136 (+) TRINITY_DN53129_c0_g1:2-409(+)	1	4.50776e-11	136.94	GSFLDK(1)SEVTDR	2	3.2366	1
	TRINITY_DN55938_c0_g1_m.16938	246	K	TRINITY_DN55938_c0_g1|g.16938 ORF TRINITY_DN55938_c0_g1|g.16938 TRINITY_DN55938_c0_g1_m.16938 type:complete len:664 (+) TRINITY_DN55938_c0_g1:259-2250(+)	1	0.00100514	54.27	LDCVFGDDFDK(1)K	2	0.23134	1
	TRINITY_DN55938_c0_g1_m.16938	138	K	TRINITY_DN55938_c0_g1|g.16938 ORF TRINITY_DN55938_c0_g1|g.16938 TRINITY_DN55938_c0_g1_m.16938 type:complete len:664 (+) TRINITY_DN55938_c0_g1:259-2250(+)	1	0.00366659	81.642	GFK(1)EVAQK	2	0.58377	1
	TRINITY_DN55938_c0_g1_m.16938	143	K	TRINITY_DN55938_c0_g1|g.16938 ORF TRINITY_DN55938_c0_g1|g.16938 TRINITY_DN55938_c0_g1_m.16938 type:complete len:664 (+) TRINITY_DN55938_c0_g1:259-2250(+)	1	0.00716566	68.548	EVAQK(1)VHDLGLK	2	-1.4218	1
	TRINITY_DN60704_c0_g1_m.17243	78	K	TRINITY_DN60704_c0_g1|g.17243 ORF TRINITY_DN60704_c0_g1|g.17243 TRINITY_DN60704_c0_g1_m.17243 type:internal len:107 (+) TRINITY_DN60704_c0_g1:3-320(+)	1	2.49619e-10	145.95	PK(1)LALWIEELNK	2	-0.49325	1
	TRINITY_DN64209_c0_g1_m.17563	191	K	TRINITY_DN64209_c0_g1|g.17563 ORF TRINITY_DN64209_c0_g1|g.17563 TRINITY_DN64209_c0_g1_m.17563 type:5prime_partial len:295 (+) TRINITY_DN64209_c0_g1:2-886(+)	1	2.95729e-06	95.345	VK(1)LQSILLPLTEFNHEEK	3	1.0197	1
	TRINITY_DN64209_c0_g1_m.17563	227	K	TRINITY_DN64209_c0_g1|g.17563 ORF TRINITY_DN64209_c0_g1|g.17563 TRINITY_DN64209_c0_g1_m.17563 type:5prime_partial len:295 (+) TRINITY_DN64209_c0_g1:2-886(+)	1	2.57715e-19	163.09	LVNEK(1)LLNTHSVAAR	2	-1.7586	2
	TRINITY_DN64209_c0_g2_m.17565	84	K	TRINITY_DN64209_c0_g2|g.17565 ORF TRINITY_DN64209_c0_g2|g.17565 TRINITY_DN64209_c0_g2_m.17565 type:complete len:264 (+) TRINITY_DN64209_c0_g2:69-860(+)	1	9.14141e-09	137.58	QELALVTSSPGK(1)SLAR	2	-0.090817	1
	TRINITY_DN64209_c0_g2_m.17565	160	K	TRINITY_DN64209_c0_g2|g.17565 ORF TRINITY_DN64209_c0_g2|g.17565 TRINITY_DN64209_c0_g2_m.17565 type:complete len:264 (+) TRINITY_DN64209_c0_g2:69-860(+)	1	6.90543e-07	104	VK(1)LQSILMPLTEFHHEEK	3	1.6032	3
	TRINITY_DN64209_c0_g2_m.17565	196	K	TRINITY_DN64209_c0_g2|g.17565 ORF TRINITY_DN64209_c0_g2|g.17565 TRINITY_DN64209_c0_g2_m.17565 type:complete len:264 (+) TRINITY_DN64209_c0_g2:69-860(+)	1	9.27039e-19	202.24	LVNEK(1)LLNLHSVAAR	2	0.8775	2
	TRINITY_DN64209_c0_g2_m.17565	150	K	TRINITY_DN64209_c0_g2|g.17565 ORF TRINITY_DN64209_c0_g2|g.17565 TRINITY_DN64209_c0_g2_m.17565 type:complete len:264 (+) TRINITY_DN64209_c0_g2:69-860(+)	1	0.00410733	105.22	LMK(1)YQNK	2	2.0419	1
	TRINITY_DN64209_c0_g2_m.17565	135	K	TRINITY_DN64209_c0_g2|g.17565 ORF TRINITY_DN64209_c0_g2|g.17565 TRINITY_DN64209_c0_g2_m.17565 type:complete len:264 (+) TRINITY_DN64209_c0_g2:69-860(+)	1	0.000159708	111.61	FFK(1)ESSEEER	2	-0.46112	1
	TRINITY_DN64261_c0_g2_m.17573	66	K	TRINITY_DN64261_c0_g2|g.17573 ORF TRINITY_DN64261_c0_g2|g.17573 TRINITY_DN64261_c0_g2_m.17573 type:complete len:142 (+) TRINITY_DN64261_c0_g2:224-649(+)	1	0.000670883	93.467	TETLEK(1)VCK	2	-1.7892	1
	TRINITY_DN67778_c0_g1_m.17831	59	K	TRINITY_DN67778_c0_g1|g.17831 ORF TRINITY_DN67778_c0_g1|g.17831 TRINITY_DN67778_c0_g1_m.17831 type:internal len:221 (+) TRINITY_DN67778_c0_g1:2-661(+)	1	1.15697e-29	241.99	ALSGQK(1)DEDFFSANAAAQASR	3	3.1251	2
	TRINITY_DN67778_c0_g1_m.17831	155	K	TRINITY_DN67778_c0_g1|g.17831 ORF TRINITY_DN67778_c0_g1|g.17831 TRINITY_DN67778_c0_g1_m.17831 type:internal len:221 (+) TRINITY_DN67778_c0_g1:2-661(+)	1	1.43875e-08	91.939	ISEEEYVNAIK(1)DEINK	2	-0.78999	1
	TRINITY_DN67778_c0_g1_m.17831	53	K	TRINITY_DN67778_c0_g1|g.17831 ORF TRINITY_DN67778_c0_g1|g.17831 TRINITY_DN67778_c0_g1_m.17831 type:internal len:221 (+) TRINITY_DN67778_c0_g1:2-661(+)	1	2.1102e-18	184.43	VVEVNALAK(1)ALSGQK	2	0.77649	1
	TRINITY_DN67778_c0_g1_m.17831	93	K	TRINITY_DN67778_c0_g1|g.17831 ORF TRINITY_DN67778_c0_g1|g.17831 TRINITY_DN67778_c0_g1_m.17831 type:internal len:221 (+) TRINITY_DN67778_c0_g1:2-661(+)	1	7.42297e-10	159.11	AAAALK(1)GSEHR	2	-0.71115	1
	TRINITY_DN67778_c0_g1_m.17831	144	K	TRINITY_DN67778_c0_g1|g.17831 ORF TRINITY_DN67778_c0_g1|g.17831 TRINITY_DN67778_c0_g1_m.17831 type:internal len:221 (+) TRINITY_DN67778_c0_g1:2-661(+)	1	1.90432e-09	110.9	ANK(1)ISEEEYVNAIKDEINK	3	2.76	1
	TRINITY_DN69419_c0_g2_m.18029	60	K	TRINITY_DN69419_c0_g2|g.18029 ORF TRINITY_DN69419_c0_g2|g.18029 TRINITY_DN69419_c0_g2_m.18029 type:complete len:307 (+) TRINITY_DN69419_c0_g2:303-1223(+)	1	0.00218016	51.454	YK(1)GMLGTVATIAR	2	-4.4372	1
	TRINITY_DN69965_c0_g1_m.18103	83	K	TRINITY_DN69965_c0_g1|g.18103 ORF TRINITY_DN69965_c0_g1|g.18103 TRINITY_DN69965_c0_g1_m.18103 type:complete len:168 (+) TRINITY_DN69965_c0_g1:219-722(+)	1	0.014915	64.064	EELEAELEGK(1)K	2	-1.3742	1
	TRINITY_DN69965_c0_g1_m.18103	110	K	TRINITY_DN69965_c0_g1|g.18103 ORF TRINITY_DN69965_c0_g1|g.18103 TRINITY_DN69965_c0_g1_m.18103 type:complete len:168 (+) TRINITY_DN69965_c0_g1:219-722(+)	1	0.00108285	65.408	EAPAVIQSYYDK(1)R	2	-2.2985	1
	TRINITY_DN71863_c0_g1_m.18308	119	K	TRINITY_DN71863_c0_g1|g.18308 ORF TRINITY_DN71863_c0_g1|g.18308 TRINITY_DN71863_c0_g1_m.18308 type:complete len:128 (+) TRINITY_DN71863_c0_g1:157-540(+)	1	6.6387e-07	154.94	SQIQQLK(1)DAIEK	2	3.2244	1
	TRINITY_DN71863_c0_g1_m.18308	43	K	TRINITY_DN71863_c0_g1|g.18308 ORF TRINITY_DN71863_c0_g1|g.18308 TRINITY_DN71863_c0_g1_m.18308 type:complete len:128 (+) TRINITY_DN71863_c0_g1:157-540(+)	1	0.000210758	116.13	GANEATK(1)TLNR	2	-0.50294	1
	TRINITY_DN73687_c0_g1_m.18572	55	K	TRINITY_DN73687_c0_g1|g.18572 ORF TRINITY_DN73687_c0_g1|g.18572 TRINITY_DN73687_c0_g1_m.18572 type:complete len:117 (+) TRINITY_DN73687_c0_g1:169-519(+)	1	0.000152387	61.067	FDANK(1)HVEDLDTIDR	2	-2.874	2
	TRINITY_DN74386_c0_g1_m.18654	116	K	TRINITY_DN74386_c0_g1|g.18654 ORF TRINITY_DN74386_c0_g1|g.18654 TRINITY_DN74386_c0_g1_m.18654 type:3prime_partial len:185 (+) TRINITY_DN74386_c0_g1:214-765(+)	1	0.0014156	57.888	ANIEQYCSK(1)R	2	-0.72738	1
	TRINITY_DN75629_c0_g1_m.18812	309	K	TRINITY_DN75629_c0_g1|g.18812 ORF TRINITY_DN75629_c0_g1|g.18812 TRINITY_DN75629_c0_g1_m.18812 type:complete len:579 (+) TRINITY_DN75629_c0_g1:219-1955(+)	1	0.0152998	44.598	VVHELK(1)DYLQK	2	-1.5649	1
	TRINITY_DN75629_c0_g1_m.18812	303	K	TRINITY_DN75629_c0_g1|g.18812 ORF TRINITY_DN75629_c0_g1|g.18812 TRINITY_DN75629_c0_g1_m.18812 type:complete len:579 (+) TRINITY_DN75629_c0_g1:219-1955(+)	1	0.00339108	83.438	DAK(1)VVHELK	2	-0.87259	1
	TRINITY_DN76932_c0_g1_m.19034	529	K	TRINITY_DN76932_c0_g1|g.19034 ORF TRINITY_DN76932_c0_g1|g.19034 TRINITY_DN76932_c0_g1_m.19034 type:complete len:625 (+) TRINITY_DN76932_c0_g1:185-2059(+)	1	0.000980984	76.572	LK(1)QLELENEK	2	-1.491	1
	TRINITY_DN77008_c0_g1_m.19048	92	K	TRINITY_DN77008_c0_g1|g.19048 ORF TRINITY_DN77008_c0_g1|g.19048 TRINITY_DN77008_c0_g1_m.19048 type:3prime_partial len:213 (+) TRINITY_DN77008_c0_g1:171-806(+)	1	2.98519e-15	207.41	VPSLEHNNEVK(1)GESLDLLK	2	-3.0546	2
	TRINITY_DN77008_c0_g1_m.19048	196	K	TRINITY_DN77008_c0_g1|g.19048 ORF TRINITY_DN77008_c0_g1|g.19048 TRINITY_DN77008_c0_g1_m.19048 type:3prime_partial len:213 (+) TRINITY_DN77008_c0_g1:171-806(+)	1	2.01308e-25	205.26	FQLFLAELK(1)NYDVTK	2	5.0904	1
	TRINITY_DN77008_c0_g1_m.19048	10	K	TRINITY_DN77008_c0_g1|g.19048 ORF TRINITY_DN77008_c0_g1|g.19048 TRINITY_DN77008_c0_g1_m.19048 type:3prime_partial len:213 (+) TRINITY_DN77008_c0_g1:171-806(+)	1	7.07298e-07	54.747	AAAVAGSYK(1)EELPPTLDATAEPPALFDGTTR	3	0.4765	1
	TRINITY_DN77008_c0_g1_m.19048	202	K	TRINITY_DN77008_c0_g1|g.19048 ORF TRINITY_DN77008_c0_g1|g.19048 TRINITY_DN77008_c0_g1_m.19048 type:3prime_partial len:213 (+) TRINITY_DN77008_c0_g1:171-806(+)	1	0.000449837	95.311	NYDVTK(1)GRPK	2	2.09	3
	TRINITY_DN77153_c0_g1_m.19086	309	K	TRINITY_DN77153_c0_g1|g.19086 ORF TRINITY_DN77153_c0_g1|g.19086 TRINITY_DN77153_c0_g1_m.19086 type:complete len:444 (+) TRINITY_DN77153_c0_g1:216-1547(+)	1	1.76226e-18	165.02	VINDTK(1)WLEQEFTER	2	1.8727	1
	TRINITY_DN77153_c0_g1_m.19086	385	K	TRINITY_DN77153_c0_g1|g.19086 ORF TRINITY_DN77153_c0_g1|g.19086 TRINITY_DN77153_c0_g1_m.19086 type:complete len:444 (+) TRINITY_DN77153_c0_g1:216-1547(+)	1	0.000688134	103.76	SK(1)GDGDYELVK	2	1.3452	2
	TRINITY_DN77153_c0_g1_m.19086	329	K	TRINITY_DN77153_c0_g1|g.19086 ORF TRINITY_DN77153_c0_g1|g.19086 TRINITY_DN77153_c0_g1_m.19086 type:complete len:444 (+) TRINITY_DN77153_c0_g1:216-1547(+)	1	0.0108204	79.809	GGVLIQK(1)WGR	2	-3.6868	1
	TRINITY_DN77153_c0_g1_m.19086	417	K	TRINITY_DN77153_c0_g1|g.19086 ORF TRINITY_DN77153_c0_g1|g.19086 TRINITY_DN77153_c0_g1_m.19086 type:complete len:444 (+) TRINITY_DN77153_c0_g1:216-1547(+)	1	5.34027e-06	139.02	TEAELIAEK(1)R	2	-1.9889	1
	TRINITY_DN77903_c0_g2_m.19165	128	K	TRINITY_DN77903_c0_g2|g.19165 ORF TRINITY_DN77903_c0_g2|g.19165 TRINITY_DN77903_c0_g2_m.19165 type:complete len:223 (+) TRINITY_DN77903_c0_g2:276-944(+)	1	1.18353e-28	228.06	LNKGEELEETK(1)K	2	-2.0597	2
	TRINITY_DN77903_c0_g2_m.19165	35	K	TRINITY_DN77903_c0_g2|g.19165 ORF TRINITY_DN77903_c0_g2|g.19165 TRINITY_DN77903_c0_g2_m.19165 type:complete len:223 (+) TRINITY_DN77903_c0_g2:276-944(+)	1	4.42549e-17	163.93	GVEYEYK(1)EENLSEK	2	-2.4196	1
	TRINITY_DN77903_c0_g2_m.19165	190	K	TRINITY_DN77903_c0_g2|g.19165 ORF TRINITY_DN77903_c0_g2|g.19165 TRINITY_DN77903_c0_g2_m.19165 type:complete len:223 (+) TRINITY_DN77903_c0_g2:276-944(+)	1	0.00921728	67.889	LAAWGK(1)R	2	-2.1897	1
	TRINITY_DN77903_c0_g2_m.19165	120	K	TRINITY_DN77903_c0_g2|g.19165 ORF TRINITY_DN77903_c0_g2|g.19165 TRINITY_DN77903_c0_g2_m.19165 type:complete len:223 (+) TRINITY_DN77903_c0_g2:276-944(+)	1	8.11166e-10	140.57	LNK(1)GEELEETK	2	-1.4882	3
	TRINITY_DN77903_c0_g2_m.19165	145	K	TRINITY_DN77903_c0_g2|g.19165 ORF TRINITY_DN77903_c0_g2|g.19165 TRINITY_DN77903_c0_g2_m.19165 type:complete len:223 (+) TRINITY_DN77903_c0_g2:276-944(+)	1	0.000227536	78.932	TLEAELGEK(1)K	2	1.5755	1
	TRINITY_DN77903_c0_g2_m.19165	48	K	TRINITY_DN77903_c0_g2|g.19165 ORF TRINITY_DN77903_c0_g2|g.19165 TRINITY_DN77903_c0_g2_m.19165 type:complete len:223 (+) TRINITY_DN77903_c0_g2:276-944(+)	1	3.43762e-07	106	SELLLK(1)SNPVHK	2	0.28739	1
	TRINITY_DN78455_c0_g1_m.19256	180	K	TRINITY_DN78455_c0_g1|g.19256 ORF TRINITY_DN78455_c0_g1|g.19256 TRINITY_DN78455_c0_g1_m.19256 type:complete len:270 (+) TRINITY_DN78455_c0_g1:101-910(+)	1	4.96933e-16	145.95	YPLVSDVTK(1)SIAK	2	1.2422	1
	TRINITY_DN78455_c0_g1_m.19256	99	K	TRINITY_DN78455_c0_g1|g.19256 ORF TRINITY_DN78455_c0_g1|g.19256 TRINITY_DN78455_c0_g1_m.19256 type:complete len:270 (+) TRINITY_DN78455_c0_g1:101-910(+)	1	0.0106784	74.269	VK(1)LSDYIGK	2	-4.5089	1
	TRINITY_DN78455_c0_g1_m.19256	260	K	TRINITY_DN78455_c0_g1|g.19256 ORF TRINITY_DN78455_c0_g1|g.19256 TRINITY_DN78455_c0_g1_m.19256 type:complete len:270 (+) TRINITY_DN78455_c0_g1:101-910(+)	1	0.0180854	86.205	SMKPDPK(1)R	2	1.4497	2
	TRINITY_DN78658_c0_g1_m.19296	94	K	TRINITY_DN78658_c0_g1|g.19296 ORF TRINITY_DN78658_c0_g1|g.19296 TRINITY_DN78658_c0_g1_m.19296 type:complete len:237 (+) TRINITY_DN78658_c0_g1:62-772(+)	1	0.000412247	111.61	TFIAIK(1)PDGVQR	2	-4.1157	1
	TRINITY_DN78658_c0_g1_m.19296	138	K	TRINITY_DN78658_c0_g1|g.19296 ORF TRINITY_DN78658_c0_g1|g.19296 TRINITY_DN78658_c0_g1_m.19296 type:complete len:237 (+) TRINITY_DN78658_c0_g1:62-772(+)	1	7.176e-05	52.662	LVVPSNEFAQQHYHDLK(1)ER	3	1.55	1
	TRINITY_DN79262_c0_g1_m.19430	209	K	TRINITY_DN79262_c0_g1|g.19430 ORF TRINITY_DN79262_c0_g1|g.19430 TRINITY_DN79262_c0_g1_m.19430 type:complete len:525 (+) TRINITY_DN79262_c0_g1:278-1852(+)	1	0.00181419	46.206	NK(1)NIEHILILSGDHLYR	3	1.1633	1
	TRINITY_DN79262_c0_g1_m.19430	483	K	TRINITY_DN79262_c0_g1|g.19430 ORF TRINITY_DN79262_c0_g1|g.19430 TRINITY_DN79262_c0_g1_m.19430 type:complete len:525 (+) TRINITY_DN79262_c0_g1:278-1852(+)	1	0.0454182	46.447	VGK(1)NVIIQNK	2	1.1967	1
	TRINITY_DN79262_c0_g1_m.19430	490	K	TRINITY_DN79262_c0_g1|g.19430 ORF TRINITY_DN79262_c0_g1|g.19430 TRINITY_DN79262_c0_g1_m.19430 type:complete len:525 (+) TRINITY_DN79262_c0_g1:278-1852(+)	1	0.000666258	87.895	NVIIQNK(1)DGVR	2	-0.54386	1
	TRINITY_DN79678_c0_g1_m.19522	153	K	TRINITY_DN79678_c0_g1|g.19522 ORF TRINITY_DN79678_c0_g1|g.19522 TRINITY_DN79678_c0_g1_m.19522 type:complete len:197 (+) TRINITY_DN79678_c0_g1:162-752(+)	1	0.0740938	51.864	SPHVHK(1)DAR	2	0.050935	1
	TRINITY_DN79779_c0_g1_m.19551	370	K	TRINITY_DN79779_c0_g1|g.19551 ORF TRINITY_DN79779_c0_g1|g.19551 TRINITY_DN79779_c0_g1_m.19551 type:5prime_partial len:454 (+) TRINITY_DN79779_c0_g1:3-1364(+)	1	4.40861e-21	207.88	NTINDEK(1)IGGK	2	-0.79631	1
	TRINITY_DN79779_c0_g1_m.19551	339	K	TRINITY_DN79779_c0_g1|g.19551 ORF TRINITY_DN79779_c0_g1|g.19551 TRINITY_DN79779_c0_g1_m.19551 type:5prime_partial len:454 (+) TRINITY_DN79779_c0_g1:3-1364(+)	1	1.41269e-08	141.29	YK(1)TEDEEHK	2	0.59295	2
	TRINITY_DN79779_c0_g1_m.19551	352	K	TRINITY_DN79779_c0_g1|g.19551 ORF TRINITY_DN79779_c0_g1|g.19551 TRINITY_DN79779_c0_g1_m.19551 type:5prime_partial len:454 (+) TRINITY_DN79779_c0_g1:3-1364(+)	1	2.77135e-06	106.47	VEAK(1)NALENYAYNMR	2	-1.6261	1
	TRINITY_DN79779_c0_g1_m.19551	141	K	TRINITY_DN79779_c0_g1|g.19551 ORF TRINITY_DN79779_c0_g1|g.19551 TRINITY_DN79779_c0_g1_m.19551 type:5prime_partial len:454 (+) TRINITY_DN79779_c0_g1:3-1364(+)	1	3.08744e-06	108.41	MDK(1)NSVHDVVLVGGSTR	2	-4.815	2
	TRINITY_DN79779_c0_g1_m.19551	374	K	TRINITY_DN79779_c0_g1|g.19551 ORF TRINITY_DN79779_c0_g1|g.19551 TRINITY_DN79779_c0_g1_m.19551 type:5prime_partial len:454 (+) TRINITY_DN79779_c0_g1:3-1364(+)	1	0.00605937	53.517	IGGK(1)LNPADK	2	-0.23419	1
	TRINITY_DN79779_c0_g1_m.19551	346	K	TRINITY_DN79779_c0_g1|g.19551 ORF TRINITY_DN79779_c0_g1|g.19551 TRINITY_DN79779_c0_g1_m.19551 type:5prime_partial len:454 (+) TRINITY_DN79779_c0_g1:3-1364(+)	1	0.000785176	121.67	TEDEEHK(1)K	2	0.41511	1
	TRINITY_DN79779_c0_g1_m.19551	410	K	TRINITY_DN79779_c0_g1|g.19551 ORF TRINITY_DN79779_c0_g1|g.19551 TRINITY_DN79779_c0_g1_m.19551 type:5prime_partial len:454 (+) TRINITY_DN79779_c0_g1:3-1364(+)	1	7.76539e-09	117.41	MK(1)ELESVCNPIIAK	2	-2.2907	2
	TRINITY_DN80014_c0_g1_m.19585	169	K	TRINITY_DN80014_c0_g1|g.19585 ORF TRINITY_DN80014_c0_g1|g.19585 TRINITY_DN80014_c0_g1_m.19585 type:5prime_partial len:531 (+) TRINITY_DN80014_c0_g1:2-1594(+)	1	0.0615018	46.033	SLSK(1)DQEFQK	2	-1.0598	1
	TRINITY_DN80778_c0_g1_m.19768	163	K	TRINITY_DN80778_c0_g1|g.19768 ORF TRINITY_DN80778_c0_g1|g.19768 TRINITY_DN80778_c0_g1_m.19768 type:complete len:334 (+) TRINITY_DN80778_c0_g1:143-1144(+)	1	0.00387382	62.88	IGPLLMK(1)MQK	2	-1.7048	1
	TRINITY_DN80778_c0_g1_m.19768	180	K	TRINITY_DN80778_c0_g1|g.19768 ORF TRINITY_DN80778_c0_g1|g.19768 TRINITY_DN80778_c0_g1_m.19768 type:complete len:334 (+) TRINITY_DN80778_c0_g1:143-1144(+)	1	0.00721385	67.887	PIDNTELTEK(1)EIIR	2	-3.5947	2
	TRINITY_DN80778_c0_g1_m.19768	286	K	TRINITY_DN80778_c0_g1|g.19768 ORF TRINITY_DN80778_c0_g1|g.19768 TRINITY_DN80778_c0_g1_m.19768 type:complete len:334 (+) TRINITY_DN80778_c0_g1:143-1144(+)	1	0.0125973	75.243	AGYENFK(1)R	2	0.69311	1
	TRINITY_DN80819_c0_g1_m.19782	27	K	TRINITY_DN80819_c0_g1|g.19782 ORF TRINITY_DN80819_c0_g1|g.19782 TRINITY_DN80819_c0_g1_m.19782 type:complete len:154 (+) TRINITY_DN80819_c0_g1:173-634(+)	1	6.31078e-21	172.92	TITLEVESSDTIDNVK(1)AK	2	-0.61017	1
	TRINITY_DN80819_c0_g1_m.19782	6	K	TRINITY_DN80819_c0_g1|g.19782 ORF TRINITY_DN80819_c0_g1|g.19782 TRINITY_DN80819_c0_g1_m.19782 type:complete len:154 (+) TRINITY_DN80819_c0_g1:173-634(+)	1	1.853e-06	142.71	VK(1)TLTGK	2	2.241	3
	TRINITY_DN80819_c0_g1_m.19782	124	K	TRINITY_DN80819_c0_g1|g.19782 ORF TRINITY_DN80819_c0_g1|g.19782 TRINITY_DN80819_c0_g1_m.19782 type:complete len:154 (+) TRINITY_DN80819_c0_g1:173-634(+)	1	0.0436724	57.293	LIYAGK(1)QLADDK	2	0.84823	1
	TRINITY_DN80819_c0_g1_m.19782	33	K	TRINITY_DN80819_c0_g1|g.19782 ORF TRINITY_DN80819_c0_g1|g.19782 TRINITY_DN80819_c0_g1_m.19782 type:complete len:154 (+) TRINITY_DN80819_c0_g1:173-634(+)	1	0.000410318	105.94	IQDK(1)EGIPPDQQR	2	-1.9599	1
	TRINITY_DN80819_c0_g1_m.19782	63	K	TRINITY_DN80819_c0_g1|g.19782 ORF TRINITY_DN80819_c0_g1|g.19782 TRINITY_DN80819_c0_g1_m.19782 type:complete len:154 (+) TRINITY_DN80819_c0_g1:173-634(+)	1	1.88974e-20	224.75	TLADYNIQK(1)ESTLHLVLR	3	-2.1676	1
	TRINITY_DN80819_c0_g1_m.19782	48	K	TRINITY_DN80819_c0_g1|g.19782 ORF TRINITY_DN80819_c0_g1|g.19782 TRINITY_DN80819_c0_g1_m.19782 type:complete len:154 (+) TRINITY_DN80819_c0_g1:173-634(+)	1	9.69154e-11	175.64	LIFAGK(1)QLEDGR	2	5.3519	3
	TRINITY_DN81026_c0_g4_m.19833	104	K	TRINITY_DN81026_c0_g4|g.19833 ORF TRINITY_DN81026_c0_g4|g.19833 TRINITY_DN81026_c0_g4_m.19833 type:complete len:125 (+) TRINITY_DN81026_c0_g4:149-523(+)	1	0.00407604	83.358	IK(1)GSLSAAQK	2	-0.48647	1
	TRINITY_DN81026_c0_g4_m.19833	27	K	TRINITY_DN81026_c0_g4|g.19833 ORF TRINITY_DN81026_c0_g4|g.19833 TRINITY_DN81026_c0_g4_m.19833 type:complete len:125 (+) TRINITY_DN81026_c0_g4:149-523(+)	1	4.34516e-05	108.24	AHLATDAGK(1)DLTK	2	-0.87553	1
	TRINITY_DN81026_c0_g4_m.19833	18	K	TRINITY_DN81026_c0_g4|g.19833 ORF TRINITY_DN81026_c0_g4|g.19833 TRINITY_DN81026_c0_g4_m.19833 type:complete len:125 (+) TRINITY_DN81026_c0_g4:149-523(+)	1	3.22165e-09	125.75	SAALLDQMK(1)AHLATDAGK	2	2.7537	1
	TRINITY_DN81026_c0_g4_m.19833	9	K	TRINITY_DN81026_c0_g4|g.19833 ORF TRINITY_DN81026_c0_g4|g.19833 TRINITY_DN81026_c0_g4_m.19833 type:complete len:125 (+) TRINITY_DN81026_c0_g4:149-523(+)	1	3.88784e-08	100.69	PGILLK(1)SAALLDQMK	2	2.6032	1
	TRINITY_DN81663_c0_g1_m.19994	104	K	TRINITY_DN81663_c0_g1|g.19994 ORF TRINITY_DN81663_c0_g1|g.19994 TRINITY_DN81663_c0_g1_m.19994 type:3prime_partial len:124 (+) TRINITY_DN81663_c0_g1:116-484(+)	1	0.000889293	63.212	SYLQDMLALVK(1)K	2	1.5878	2
	TRINITY_DN81663_c0_g1_m.19994	77	K	TRINITY_DN81663_c0_g1|g.19994 ORF TRINITY_DN81663_c0_g1|g.19994 TRINITY_DN81663_c0_g1_m.19994 type:3prime_partial len:124 (+) TRINITY_DN81663_c0_g1:116-484(+)	1	2.4809e-06	92.593	ALDLSMK(1)HEYLSEEMQK	2	-0.61374	3
	TRINITY_DN81786_c0_g1_m.20026	152	K	TRINITY_DN81786_c0_g1|g.20026 ORF TRINITY_DN81786_c0_g1|g.20026 TRINITY_DN81786_c0_g1_m.20026 type:complete len:174 (+) TRINITY_DN81786_c0_g1:77-598(+)	1	2.08837e-06	135.28	DVEK(1)VGSSSGR	2	0.51166	1
	TRINITY_DN81786_c0_g1_m.20026	98	K	TRINITY_DN81786_c0_g1|g.20026 ORF TRINITY_DN81786_c0_g1|g.20026 TRINITY_DN81786_c0_g1_m.20026 type:complete len:174 (+) TRINITY_DN81786_c0_g1:77-598(+)	1	1.09201e-05	154.71	FADENFVK(1)K	2	0.41227	1
	TRINITY_DN81786_c0_g1_m.20026	57	K	TRINITY_DN81786_c0_g1|g.20026 ORF TRINITY_DN81786_c0_g1|g.20026 TRINITY_DN81786_c0_g1_m.20026 type:complete len:174 (+) TRINITY_DN81786_c0_g1:77-598(+)	1	2.23018e-10	170.85	PLHFK(1)GSAFHR	3	-0.036859	3
	TRINITY_DN81786_c0_g1_m.20026	45	K	TRINITY_DN81786_c0_g1|g.20026 ORF TRINITY_DN81786_c0_g1|g.20026 TRINITY_DN81786_c0_g1_m.20026 type:complete len:174 (+) TRINITY_DN81786_c0_g1:77-598(+)	1	0.0028322	81.335	ALCTGEK(1)GIGK	2	-1.2318	1
	TRINITY_DN81786_c0_g1_m.20026	133	K	TRINITY_DN81786_c0_g1|g.20026 ORF TRINITY_DN81786_c0_g1|g.20026 TRINITY_DN81786_c0_g1_m.20026 type:complete len:174 (+) TRINITY_DN81786_c0_g1:77-598(+)	1	6.72961e-16	164.79	TSWLDGK(1)HVVFGQVVEGLNVVR	3	-0.8932	1
	TRINITY_DN81844_c0_g1_m.20039	179	K	TRINITY_DN81844_c0_g1|g.20039 ORF TRINITY_DN81844_c0_g1|g.20039 TRINITY_DN81844_c0_g1_m.20039 type:complete len:245 (+) TRINITY_DN81844_c0_g1:81-815(+)	1	0.000192783	49.485	HK(1)IICIEDLIHEIFTVGPHFK	4	-0.5634	1
	TRINITY_DN81844_c0_g1_m.20039	177	K	TRINITY_DN81844_c0_g1|g.20039 ORF TRINITY_DN81844_c0_g1|g.20039 TRINITY_DN81844_c0_g1_m.20039 type:complete len:245 (+) TRINITY_DN81844_c0_g1:81-815(+)	1	1.42784e-09	132.93	IPLTNNSIIEQGLGK(1)HK	3	-2.2141	1
	TRINITY_DN81844_c0_g1_m.20039	7	K	TRINITY_DN81844_c0_g1|g.20039 ORF TRINITY_DN81844_c0_g1|g.20039 TRINITY_DN81844_c0_g1_m.20039 type:complete len:245 (+) TRINITY_DN81844_c0_g1:81-815(+)	1	0.000416149	58.338	AEVEAK(1)NVIPESVLK	2	2.2876	1
	TRINITY_DN81844_c0_g1_m.20039	100	K	TRINITY_DN81844_c0_g1|g.20039 ORF TRINITY_DN81844_c0_g1|g.20039 TRINITY_DN81844_c0_g1_m.20039 type:complete len:245 (+) TRINITY_DN81844_c0_g1:81-815(+)	1	0.00142974	94.804	GINAMHPK(1)TK	2	0.54843	1
	TRINITY_DN81844_c0_g1_m.20039	55	K	TRINITY_DN81844_c0_g1|g.20039 ORF TRINITY_DN81844_c0_g1|g.20039 TRINITY_DN81844_c0_g1_m.20039 type:complete len:245 (+) TRINITY_DN81844_c0_g1:81-815(+)	1	9.71993e-06	112.73	AEQYAK(1)EYENQEK	2	-2.0432	1
	TRINITY_DN81936_c0_g1_m.20073	79	K	TRINITY_DN81936_c0_g1|g.20073 ORF TRINITY_DN81936_c0_g1|g.20073 TRINITY_DN81936_c0_g1_m.20073 type:complete len:165 (+) TRINITY_DN81936_c0_g1:141-635(+)	1	0.018705	65.408	GGESIYGTK(1)FEDEIR	2	-2.0971	1
	TRINITY_DN82028_c0_g2_m.20103	45	K	TRINITY_DN82028_c0_g2|g.20103 ORF TRINITY_DN82028_c0_g2|g.20103 TRINITY_DN82028_c0_g2_m.20103 type:complete len:153 (+) TRINITY_DN82028_c0_g2:135-593(+)	1	5.54388e-10	121.69	YANNSNYK(1)NDTMIR	2	-2.9642	1
	TRINITY_DN82111_c0_g1_m.20118	237	K	TRINITY_DN82111_c0_g1|g.20118 ORF TRINITY_DN82111_c0_g1|g.20118 TRINITY_DN82111_c0_g1_m.20118 type:complete len:414 (+) TRINITY_DN82111_c0_g1:136-1377(+)	1	0.0143978	54.056	FMHK(1)PVR	2	0.56868	1
	TRINITY_DN82111_c0_g1_m.20118	62	K	TRINITY_DN82111_c0_g1|g.20118 ORF TRINITY_DN82111_c0_g1|g.20118 TRINITY_DN82111_c0_g1_m.20118 type:complete len:414 (+) TRINITY_DN82111_c0_g1:136-1377(+)	1	8.87981e-09	124.06	GIYAYGFEK(1)PSAIQQR	2	-2.2461	1
	TRINITY_DN82380_c1_g2_m.20182	308	K	TRINITY_DN82380_c1_g2|g.20182 ORF TRINITY_DN82380_c1_g2|g.20182 TRINITY_DN82380_c1_g2_m.20182 type:internal len:384 (+) TRINITY_DN82380_c1_g2:2-1150(+)	1	9.08151e-07	85.742	SVGFPSGK(1)YLFAGIVDGR	2	2.0918	1
	TRINITY_DN82380_c1_g2_m.20182	57	K	TRINITY_DN82380_c1_g2|g.20182 ORF TRINITY_DN82380_c1_g2|g.20182 TRINITY_DN82380_c1_g2_m.20182 type:internal len:384 (+) TRINITY_DN82380_c1_g2:2-1150(+)	1	8.79326e-12	112.7	STAEDLQK(1)VAANLR	2	1.221	1
	TRINITY_DN82380_c1_g2_m.20182	157	K	TRINITY_DN82380_c1_g2|g.20182 ORF TRINITY_DN82380_c1_g2|g.20182 TRINITY_DN82380_c1_g2_m.20182 type:internal len:384 (+) TRINITY_DN82380_c1_g2:2-1150(+)	1	9.10796e-19	139.7	FSYASHK(1)AVSEYNEAK	2	-4.0953	3
	TRINITY_DN82781_c0_g1_m.20269	29	K	TRINITY_DN82781_c0_g1|g.20269 ORF TRINITY_DN82781_c0_g1|g.20269 TRINITY_DN82781_c0_g1_m.20269 type:complete len:441 (+) TRINITY_DN82781_c0_g1:196-1518(+)	1	0.0241277	43.272	LAGDVAGTK(1)K	2	0.1711	1
	TRINITY_DN82781_c0_g1_m.20269	435	K	TRINITY_DN82781_c0_g1|g.20269 ORF TRINITY_DN82781_c0_g1|g.20269 TRINITY_DN82781_c0_g1_m.20269 type:complete len:441 (+) TRINITY_DN82781_c0_g1:196-1518(+)	1	0.000213929	102.55	ETMVHK(1)AVLK	2	-1.1376	1
	TRINITY_DN82781_c0_g1_m.20269	336	K	TRINITY_DN82781_c0_g1|g.20269 ORF TRINITY_DN82781_c0_g1|g.20269 TRINITY_DN82781_c0_g1_m.20269 type:complete len:441 (+) TRINITY_DN82781_c0_g1:196-1518(+)	1	0.0119645	56.014	AAEDLK(1)LR	2	0.81898	1
	TRINITY_DN83093_c0_g1_m.20330	59	K	TRINITY_DN83093_c0_g1|g.20330 ORF TRINITY_DN83093_c0_g1|g.20330 TRINITY_DN83093_c0_g1_m.20330 type:complete len:135 (+) TRINITY_DN83093_c0_g1:76-480(+)	1	2.1705e-08	117.45	LSLTDIK(1)IDIPR	2	2.5447	1
	TRINITY_DN83093_c0_g1_m.20330	81	K	TRINITY_DN83093_c0_g1|g.20330 ORF TRINITY_DN83093_c0_g1|g.20330 TRINITY_DN83093_c0_g1_m.20330 type:complete len:135 (+) TRINITY_DN83093_c0_g1:76-480(+)	1	0.00606933	65.879	LIAAMDAADVK(1)NK	2	0.46444	1
	TRINITY_DN83093_c0_g1_m.20330	109	K	TRINITY_DN83093_c0_g1|g.20330 ORF TRINITY_DN83093_c0_g1|g.20330 TRINITY_DN83093_c0_g1_m.20330 type:complete len:135 (+) TRINITY_DN83093_c0_g1:76-480(+)	1	0.0580727	49.058	FK(1)VMLAK	2	-3.1518	1
	TRINITY_DN83093_c0_g1_m.20330	70	K	TRINITY_DN83093_c0_g1|g.20330 ORF TRINITY_DN83093_c0_g1|g.20330 TRINITY_DN83093_c0_g1_m.20330 type:complete len:135 (+) TRINITY_DN83093_c0_g1:76-480(+)	1	0.00743733	69.641	SK(1)LIAAMDAADVK	2	2.8087	1
	TRINITY_DN83093_c0_g1_m.20330	19	K	TRINITY_DN83093_c0_g1|g.20330 ORF TRINITY_DN83093_c0_g1|g.20330 TRINITY_DN83093_c0_g1_m.20330 type:complete len:135 (+) TRINITY_DN83093_c0_g1:76-480(+)	1	3.95012e-05	103.87	VALVNYGK(1)EYGR	2	2.4114	1
	TRINITY_DN83093_c0_g1_m.20330	51	K	TRINITY_DN83093_c0_g1|g.20330 ORF TRINITY_DN83093_c0_g1|g.20330 TRINITY_DN83093_c0_g1_m.20330 type:complete len:135 (+) TRINITY_DN83093_c0_g1:76-480(+)	1	0.0212643	54.056	GQMNFK(1)R	2	-0.25041	1
	TRINITY_DN83248_c0_g1_m.20411	132	K	TRINITY_DN83248_c0_g1|g.20411 ORF TRINITY_DN83248_c0_g1|g.20411 TRINITY_DN83248_c0_g1_m.20411 type:5prime_partial len:143 (+) TRINITY_DN83248_c0_g1:2-430(+)	1	1.895e-06	76.196	YTEVKPALTNLVAAAK(1)QLR	3	0.25391	2
	TRINITY_DN83248_c0_g1_m.20411	121	K	TRINITY_DN83248_c0_g1|g.20411 ORF TRINITY_DN83248_c0_g1|g.20411 TRINITY_DN83248_c0_g1_m.20411 type:5prime_partial len:143 (+) TRINITY_DN83248_c0_g1:2-430(+)	0.986239	2.09429e-05	89.359	K(0.014)YTEVK(0.986)PALTNLVAAAK	3	-2.1726	1
	TRINITY_DN83309_c0_g1_m.20443	221	K	TRINITY_DN83309_c0_g1|g.20443 ORF TRINITY_DN83309_c0_g1|g.20443 TRINITY_DN83309_c0_g1_m.20443 type:complete len:558 (+) TRINITY_DN83309_c0_g1:194-1867(+)	1	0.0595192	40.861	GVMFNK(1)DVVAPGK	2	7.6905	1
	TRINITY_DN83309_c0_g1_m.20443	286	K	TRINITY_DN83309_c0_g1|g.20443 ORF TRINITY_DN83309_c0_g1|g.20443 TRINITY_DN83309_c0_g1_m.20443 type:complete len:558 (+) TRINITY_DN83309_c0_g1:194-1867(+)	1	0.0168118	50.297	FK(1)PDLVITEK	2	-2.3012	1
	TRINITY_DN83309_c0_g1_m.20443	502	K	TRINITY_DN83309_c0_g1|g.20443 ORF TRINITY_DN83309_c0_g1|g.20443 TRINITY_DN83309_c0_g1_m.20443 type:complete len:558 (+) TRINITY_DN83309_c0_g1:194-1867(+)	1	9.42641e-23	156.14	IWDAYNVK(1)AQTFK	2	0.6479	1
	TRINITY_DN83309_c0_g1_m.20443	9	K	TRINITY_DN83309_c0_g1|g.20443 ORF TRINITY_DN83309_c0_g1|g.20443 TRINITY_DN83309_c0_g1_m.20443 type:complete len:558 (+) TRINITY_DN83309_c0_g1:194-1867(+)	1	5.86615e-05	57.003	MHAPVLVLK(1)DSLK	2	1.2683	1
	TRINITY_DN83309_c0_g1_m.20443	425	K	TRINITY_DN83309_c0_g1|g.20443 ORF TRINITY_DN83309_c0_g1|g.20443 TRINITY_DN83309_c0_g1_m.20443 type:complete len:558 (+) TRINITY_DN83309_c0_g1:194-1867(+)	1	2.92472e-10	172.1	QK(1)SSSIEGIEK	2	0.11925	1
	TRINITY_DN83309_c0_g1_m.20443	212	K	TRINITY_DN83309_c0_g1|g.20443 ORF TRINITY_DN83309_c0_g1|g.20443 TRINITY_DN83309_c0_g1_m.20443 type:complete len:558 (+) TRINITY_DN83309_c0_g1:194-1867(+)	1	0.000461614	77.157	VPGGQLEDSK(1)VLK	2	-1.2131	1
	TRINITY_DN83309_c0_g1_m.20443	507	K	TRINITY_DN83309_c0_g1|g.20443 ORF TRINITY_DN83309_c0_g1|g.20443 TRINITY_DN83309_c0_g1_m.20443 type:complete len:558 (+) TRINITY_DN83309_c0_g1:194-1867(+)	1	6.15625e-09	113.34	AQTFK(1)TAIEAASMLLR	2	2.1043	1
	TRINITY_DN83309_c0_g1_m.20443	423	K	TRINITY_DN83309_c0_g1|g.20443 ORF TRINITY_DN83309_c0_g1|g.20443 TRINITY_DN83309_c0_g1_m.20443 type:complete len:558 (+) TRINITY_DN83309_c0_g1:194-1867(+)	1	0.0517825	42.495	LVPGGGATEMTVSAALK(1)QK	2	-5.5475	1
	TRINITY_DN83379_c0_g1_m.20462	673	K	TRINITY_DN83379_c0_g1|g.20462 ORF TRINITY_DN83379_c0_g1|g.20462 TRINITY_DN83379_c0_g1_m.20462 type:complete len:865 (+) TRINITY_DN83379_c0_g1:161-2755(+)	1	0.0160094	43.306	AQK(1)EYEAAELK	2	-0.34188	1
	TRINITY_DN83681_c0_g1_m.20543	311	K	TRINITY_DN83681_c0_g1|g.20543 ORF TRINITY_DN83681_c0_g1|g.20543 TRINITY_DN83681_c0_g1_m.20543 type:5prime_partial len:335 (+) TRINITY_DN83681_c0_g1:1-1005(+)	0.808917	9.21186e-05	84.309	YAEITEWSDK(0.191)PK(0.809)VK	2	-5.3793	1
	TRINITY_DN83837_c0_g1_m.20601	202	K	TRINITY_DN83837_c0_g1|g.20601 ORF TRINITY_DN83837_c0_g1|g.20601 TRINITY_DN83837_c0_g1_m.20601 type:complete len:481 (+) TRINITY_DN83837_c0_g1:268-1710(+)	0.999411	0.0421388	57.042	LFIGNVPK(0.999)SLAEEELK(0.001)R	3	-1.337	1
	TRINITY_DN83980_c0_g1_m.20661	147	K	TRINITY_DN83980_c0_g1|g.20661 ORF TRINITY_DN83980_c0_g1|g.20661 TRINITY_DN83980_c0_g1_m.20661 type:complete len:342 (+) TRINITY_DN83980_c0_g1:225-1250(+)	1	0.0199462	45.939	SDHLK(1)RPENWK	3	1.1275	1
	TRINITY_DN83980_c0_g1_m.20661	274	K	TRINITY_DN83980_c0_g1|g.20661 ORF TRINITY_DN83980_c0_g1|g.20661 TRINITY_DN83980_c0_g1_m.20661 type:complete len:342 (+) TRINITY_DN83980_c0_g1:225-1250(+)	1	4.58084e-29	162.14	ITVITQGSDPVVVAEDGK(1)VR	2	-0.49205	1
	TRINITY_DN83980_c0_g1_m.20661	101	K	TRINITY_DN83980_c0_g1|g.20661 ORF TRINITY_DN83980_c0_g1|g.20661 TRINITY_DN83980_c0_g1_m.20661 type:complete len:342 (+) TRINITY_DN83980_c0_g1:225-1250(+)	1	0.000351647	57.22	NVK(1)EAGVNAHYYEDETAPTGTCAVCVVGGER	3	-2.45	1
	TRINITY_DN83980_c0_g1_m.20661	97	K	TRINITY_DN83980_c0_g1|g.20661 ORF TRINITY_DN83980_c0_g1|g.20661 TRINITY_DN83980_c0_g1_m.20661 type:complete len:342 (+) TRINITY_DN83980_c0_g1:225-1250(+)	0.999997	0.057008	59.645	DKFGEEMK(1)K	2	0.42532	1
	TRINITY_DN83980_c0_g1_m.20661	285	K	TRINITY_DN83980_c0_g1|g.20661 ORF TRINITY_DN83980_c0_g1|g.20661 TRINITY_DN83980_c0_g1_m.20661 type:complete len:342 (+) TRINITY_DN83980_c0_g1:225-1250(+)	1	0.0144987	47.561	LFPVILLPK(1)EK	2	3.9692	1
	TRINITY_DN83980_c0_g1_m.20661	249	K	TRINITY_DN83980_c0_g1|g.20661 ORF TRINITY_DN83980_c0_g1|g.20661 TRINITY_DN83980_c0_g1_m.20661 type:complete len:342 (+) TRINITY_DN83980_c0_g1:225-1250(+)	1	0.0174897	51.531	ISALPK(1)ASGTHK	2	-0.86584	1
	TRINITY_DN84253_c0_g1_m.20747	210	K	TRINITY_DN84253_c0_g1|g.20747 ORF TRINITY_DN84253_c0_g1|g.20747 TRINITY_DN84253_c0_g1_m.20747 type:complete len:225 (+) TRINITY_DN84253_c0_g1:162-836(+)	1	0.0167742	65.313	ELEFYLK(1)K	2	-0.53061	1
	TRINITY_DN84253_c0_g1_m.20747	55	K	TRINITY_DN84253_c0_g1|g.20747 ORF TRINITY_DN84253_c0_g1|g.20747 TRINITY_DN84253_c0_g1_m.20747 type:complete len:225 (+) TRINITY_DN84253_c0_g1:162-836(+)	1	0.0251251	61.494	GGNVK(1)WR	2	-1.2701	1
	TRINITY_DN84253_c0_g1_m.20747	150	K	TRINITY_DN84253_c0_g1|g.20747 ORF TRINITY_DN84253_c0_g1|g.20747 TRINITY_DN84253_c0_g1_m.20747 type:complete len:225 (+) TRINITY_DN84253_c0_g1:162-836(+)	1	3.59086e-09	107.46	DAPEGQEGEAQQEEVK(1)K	2	-3.5225	1
	TRINITY_DN84369_c0_g1_m.20773	426	K	TRINITY_DN84369_c0_g1|g.20773 ORF TRINITY_DN84369_c0_g1|g.20773 TRINITY_DN84369_c0_g1_m.20773 type:5prime_partial len:475 (+) TRINITY_DN84369_c0_g1:2-1426(+)	1	6.61673e-06	107.08	FGSYWIK(1)DGK	2	-2.4285	1
	TRINITY_DN84369_c0_g1_m.20773	463	K	TRINITY_DN84369_c0_g1|g.20773 ORF TRINITY_DN84369_c0_g1|g.20773 TRINITY_DN84369_c0_g1_m.20773 type:5prime_partial len:475 (+) TRINITY_DN84369_c0_g1:2-1426(+)	1	0.00158751	49.485	LQPPVADVDQLK(1)NEGLSFATK	3	2.7814	1
	TRINITY_DN84369_c0_g1_m.20773	282	K	TRINITY_DN84369_c0_g1|g.20773 ORF TRINITY_DN84369_c0_g1|g.20773 TRINITY_DN84369_c0_g1_m.20773 type:5prime_partial len:475 (+) TRINITY_DN84369_c0_g1:2-1426(+)	1	0.00172048	50.131	GTVAVGFNSDANGDVTAVK(1)LK	2	-2.3712	1
	TRINITY_DN84369_c0_g1_m.20773	91	K	TRINITY_DN84369_c0_g1|g.20773 ORF TRINITY_DN84369_c0_g1|g.20773 TRINITY_DN84369_c0_g1_m.20773 type:5prime_partial len:475 (+) TRINITY_DN84369_c0_g1:2-1426(+)	1	1.92671e-12	154.94	PALSK(1)AYLFPQGAAR	2	1.8541	1
	TRINITY_DN84369_c0_g1_m.20773	451	K	TRINITY_DN84369_c0_g1|g.20773 ORF TRINITY_DN84369_c0_g1|g.20773 TRINITY_DN84369_c0_g1_m.20773 type:5prime_partial len:475 (+) TRINITY_DN84369_c0_g1:2-1426(+)	1	0.0009983	68.108	VAK(1)LQPPVADVDQLK	2	1.2767	1
	TRINITY_DN84369_c0_g1_m.20773	78	K	TRINITY_DN84369_c0_g1|g.20773 ORF TRINITY_DN84369_c0_g1|g.20773 TRINITY_DN84369_c0_g1_m.20773 type:5prime_partial len:475 (+) TRINITY_DN84369_c0_g1:2-1426(+)	1	2.77887e-17	176.97	LAIISK(1)EGVAPYER	2	-0.29818	1
	TRINITY_DN84369_c0_g1_m.20773	308	K	TRINITY_DN84369_c0_g1|g.20773 ORF TRINITY_DN84369_c0_g1|g.20773 TRINITY_DN84369_c0_g1_m.20773 type:5prime_partial len:475 (+) TRINITY_DN84369_c0_g1:2-1426(+)	1	1.02368e-79	324.67	PLTTLFK(1)GQVDEEK	2	-0.98462	1
	TRINITY_DN84369_c0_g1_m.20773	315	K	TRINITY_DN84369_c0_g1|g.20773 ORF TRINITY_DN84369_c0_g1|g.20773 TRINITY_DN84369_c0_g1_m.20773 type:5prime_partial len:475 (+) TRINITY_DN84369_c0_g1:2-1426(+)	1	9.63988e-07	167.76	GQVDEEK(1)GGIK	2	0.53849	1
	TRINITY_DN84369_c0_g1_m.20773	200	K	TRINITY_DN84369_c0_g1|g.20773 ORF TRINITY_DN84369_c0_g1|g.20773 TRINITY_DN84369_c0_g1_m.20773 type:5prime_partial len:475 (+) TRINITY_DN84369_c0_g1:2-1426(+)	1	9.09794e-06	133.98	LLEVIQSK(1)K	2	-1.11	1
	TRINITY_DN84369_c0_g1_m.20773	366	K	TRINITY_DN84369_c0_g1|g.20773 ORF TRINITY_DN84369_c0_g1|g.20773 TRINITY_DN84369_c0_g1_m.20773 type:5prime_partial len:475 (+) TRINITY_DN84369_c0_g1:2-1426(+)	1	0.000823937	99.34	SAEHAVK(1)TIK	2	-0.51235	1
	TRINITY_DN84369_c0_g1_m.20773	419	K	TRINITY_DN84369_c0_g1|g.20773 ORF TRINITY_DN84369_c0_g1|g.20773 TRINITY_DN84369_c0_g1_m.20773 type:5prime_partial len:475 (+) TRINITY_DN84369_c0_g1:2-1426(+)	1	1.84193e-05	109.88	PK(1)FGSYWIK	2	1.5317	1
	TRINITY_DN84369_c0_g1_m.20773	72	K	TRINITY_DN84369_c0_g1|g.20773 ORF TRINITY_DN84369_c0_g1|g.20773 TRINITY_DN84369_c0_g1_m.20773 type:5prime_partial len:475 (+) TRINITY_DN84369_c0_g1:2-1426(+)	1	1.47021e-07	138	LGLSSGK(1)LAIISK	2	-2.5873	1
	TRINITY_DN84369_c0_g1_m.20773	65	K	TRINITY_DN84369_c0_g1|g.20773 ORF TRINITY_DN84369_c0_g1|g.20773 TRINITY_DN84369_c0_g1_m.20773 type:5prime_partial len:475 (+) TRINITY_DN84369_c0_g1:2-1426(+)	1	0.013486	62.271	EFAK(1)LGLSSGK	2	-1.1077	1
	TRINITY_DN85377_c0_g1_m.21083	290	K	TRINITY_DN85377_c0_g1|g.21083 ORF TRINITY_DN85377_c0_g1|g.21083 TRINITY_DN85377_c0_g1_m.21083 type:complete len:448 (+) TRINITY_DN85377_c0_g1:145-1488(+)	1	0.00703545	42.941	GLGSPVFDK(1)LEAEFAK	2	1.1961	1
	TRINITY_DN85575_c0_g3_m.21159	158	K	TRINITY_DN85575_c0_g3|g.21159 ORF TRINITY_DN85575_c0_g3|g.21159 TRINITY_DN85575_c0_g3_m.21159 type:5prime_partial len:169 (+) TRINITY_DN85575_c0_g3:2-508(+)	1	3.12696e-22	200.06	HAVSEGTK(1)AVTK	2	1.5783	1
	TRINITY_DN85575_c0_g3_m.21159	88	K	TRINITY_DN85575_c0_g3|g.21159 ORF TRINITY_DN85575_c0_g3|g.21159 TRINITY_DN85575_c0_g3_m.21159 type:5prime_partial len:169 (+) TRINITY_DN85575_c0_g3:2-508(+)	1	2.15006e-05	87.573	VLK(1)QVHPDTGISNR	2	-2.1408	1
	TRINITY_DN85575_c0_g3_m.21159	121	K	TRINITY_DN85575_c0_g3|g.21159 ORF TRINITY_DN85575_c0_g3|g.21159 TRINITY_DN85575_c0_g3_m.21159 type:5prime_partial len:169 (+) TRINITY_DN85575_c0_g3:2-508(+)	1	0.000273673	99.174	VATEASK(1)LAAYNK	2	-2.6385	1
	TRINITY_DN85598_c0_g2_m.21173	163	K	TRINITY_DN85598_c0_g2|g.21173 ORF TRINITY_DN85598_c0_g2|g.21173 TRINITY_DN85598_c0_g2_m.21173 type:complete len:184 (+) TRINITY_DN85598_c0_g2:113-664(+)	1	0.00188593	69.915	DDAMK(1)WFQVK	2	-0.87965	1
	TRINITY_DN85598_c0_g2_m.21173	87	K	TRINITY_DN85598_c0_g2|g.21173 ORF TRINITY_DN85598_c0_g2|g.21173 TRINITY_DN85598_c0_g2_m.21173 type:complete len:184 (+) TRINITY_DN85598_c0_g2:113-664(+)	1	0.0019249	54.584	AMQLLESGLK(1)VK	2	-0.033255	1
	TRINITY_DN85598_c0_g2_m.21173	37	K	TRINITY_DN85598_c0_g2|g.21173 ORF TRINITY_DN85598_c0_g2|g.21173 TRINITY_DN85598_c0_g2_m.21173 type:complete len:184 (+) TRINITY_DN85598_c0_g2:113-664(+)	1	1.47865e-13	127.07	ASK(1)VLEQLSGQTPVFSK	2	-2.8171	1
	TRINITY_DN85598_c0_g2_m.21173	89	K	TRINITY_DN85598_c0_g2|g.21173 ORF TRINITY_DN85598_c0_g2|g.21173 TRINITY_DN85598_c0_g2_m.21173 type:complete len:184 (+) TRINITY_DN85598_c0_g2:113-664(+)	1	0.00211677	84.368	VK(1)EYELLR	2	-2.9801	1
	TRINITY_DN85598_c0_g2_m.21173	51	K	TRINITY_DN85598_c0_g2|g.21173 ORF TRINITY_DN85598_c0_g2|g.21173 TRINITY_DN85598_c0_g2_m.21173 type:complete len:184 (+) TRINITY_DN85598_c0_g2:113-664(+)	1	5.47621e-19	155.57	VLEQLSGQTPVFSK(1)AR	2	-1.0221	1
	TRINITY_DN85620_c0_g8_m.21188	106	K	TRINITY_DN85620_c0_g8|g.21188 ORF TRINITY_DN85620_c0_g8|g.21188 TRINITY_DN85620_c0_g8_m.21188 type:5prime_partial len:111 (+) TRINITY_DN85620_c0_g8:3-335(+)	1	0.04028	71.896	DHRPLELHGPK(1)K	3	1.5583	1
	TRINITY_DN85620_c0_g8_m.21188	76	K	TRINITY_DN85620_c0_g8|g.21188 ORF TRINITY_DN85620_c0_g8|g.21188 TRINITY_DN85620_c0_g8_m.21188 type:5prime_partial len:111 (+) TRINITY_DN85620_c0_g8:3-335(+)	1	1.0793e-06	136.84	IEGVNHLQK(1)CR	2	-0.97576	1
	TRINITY_DN86137_c0_g1_m.21438	147	K	TRINITY_DN86137_c0_g1|g.21438 ORF TRINITY_DN86137_c0_g1|g.21438 TRINITY_DN86137_c0_g1_m.21438 type:complete len:528 (+) TRINITY_DN86137_c0_g1:277-1860(+)	1	1.65566e-12	154.81	EILEHESSK(1)R	2	0.19221	1
	TRINITY_DN86137_c0_g1_m.21438	103	K	TRINITY_DN86137_c0_g1|g.21438 ORF TRINITY_DN86137_c0_g1|g.21438 TRINITY_DN86137_c0_g1_m.21438 type:complete len:528 (+) TRINITY_DN86137_c0_g1:277-1860(+)	1	1.5475e-08	142.08	GK(1)EDSVEELDYLSK	2	0.50879	1
	TRINITY_DN86137_c0_g1_m.21438	228	K	TRINITY_DN86137_c0_g1|g.21438 ORF TRINITY_DN86137_c0_g1|g.21438 TRINITY_DN86137_c0_g1_m.21438 type:complete len:528 (+) TRINITY_DN86137_c0_g1:277-1860(+)	1	0.00197753	70.806	IDHYLGK(1)ELVQNLLVVR	3	1.7435	1
	TRINITY_DN86137_c0_g1_m.21438	386	K	TRINITY_DN86137_c0_g1|g.21438 ORF TRINITY_DN86137_c0_g1|g.21438 TRINITY_DN86137_c0_g1_m.21438 type:complete len:528 (+) TRINITY_DN86137_c0_g1:277-1860(+)	1	6.21849e-05	78.043	VQFK(1)EVPGDIYK	2	3.4069	1
	TRINITY_DN86137_c0_g1_m.21438	313	K	TRINITY_DN86137_c0_g1|g.21438 ORF TRINITY_DN86137_c0_g1|g.21438 TRINITY_DN86137_c0_g1_m.21438 type:complete len:528 (+) TRINITY_DN86137_c0_g1:277-1860(+)	1	0.000677556	96.957	VK(1)VLQSVLPIK	2	-0.753	1
	TRINITY_DN86137_c0_g1_m.21438	438	K	TRINITY_DN86137_c0_g1|g.21438 ORF TRINITY_DN86137_c0_g1|g.21438 TRINITY_DN86137_c0_g1_m.21438 type:complete len:528 (+) TRINITY_DN86137_c0_g1:277-1860(+)	0.999999	5.35211e-05	63.025	KPGLEMSTIQSELDLSYK(1)QR	3	-1.5809	1
	TRINITY_DN86360_c0_g1_m.21532	324	K	TRINITY_DN86360_c0_g1|g.21532 ORF TRINITY_DN86360_c0_g1|g.21532 TRINITY_DN86360_c0_g1_m.21532 type:5prime_partial len:357 (+) TRINITY_DN86360_c0_g1:2-1072(+)	1	0.0160876	69.093	FTNQK(1)LK	2	-0.24346	1
	TRINITY_DN86380_c0_g9_m.21548	34	K	TRINITY_DN86380_c0_g9|g.21548 ORF TRINITY_DN86380_c0_g9|g.21548 TRINITY_DN86380_c0_g9_m.21548 type:5prime_partial len:159 (+) TRINITY_DN86380_c0_g9:3-479(+)	1	0.00632716	60.547	TPLDQATQK(1)HR	2	0.16997	1
	TRINITY_DN86435_c0_g1_m.21578	232	K	TRINITY_DN86435_c0_g1|g.21578 ORF TRINITY_DN86435_c0_g1|g.21578 TRINITY_DN86435_c0_g1_m.21578 type:complete len:245 (+) TRINITY_DN86435_c0_g1:231-965(+)	1	0.0100606	43.518	DFEDPK(1)LWTAIEASLK	2	2.0959	1
	TRINITY_DN86442_c0_g2_m.21581	112	K	TRINITY_DN86442_c0_g2|g.21581 ORF TRINITY_DN86442_c0_g2|g.21581 TRINITY_DN86442_c0_g2_m.21581 type:complete len:152 (+) TRINITY_DN86442_c0_g2:105-560(+)	0.999996	0.0625319	62.88	DKDSK(1)FR	2	3.3133	1
	TRINITY_DN86442_c0_g2_m.21581	64	K	TRINITY_DN86442_c0_g2|g.21581 ORF TRINITY_DN86442_c0_g2|g.21581 TRINITY_DN86442_c0_g2_m.21581 type:complete len:152 (+) TRINITY_DN86442_c0_g2:105-560(+)	1	1.29648e-09	101.43	DSHGIAQVK(1)SVTGSK	2	-3.3332	1
	TRINITY_DN86446_c0_g1_m.21583	58	K	TRINITY_DN86446_c0_g1|g.21583 ORF TRINITY_DN86446_c0_g1|g.21583 TRINITY_DN86446_c0_g1_m.21583 type:complete len:262 (+) TRINITY_DN86446_c0_g1:242-1027(+)	1	0.0086682	47.361	VLEVEQK(1)FNEIR	2	-4.0905	1
	TRINITY_DN86703_c0_g1_m.21707	1006	K	TRINITY_DN86703_c0_g1|g.21707 ORF TRINITY_DN86703_c0_g1|g.21707 TRINITY_DN86703_c0_g1_m.21707 type:complete len:2264 (+) TRINITY_DN86703_c0_g1:636-7427(+)	1	0.00196852	67.887	ASQLLEQTK(1)LSELR	2	-5.9693	1
	TRINITY_DN86809_c0_g1_m.21753	135	K	TRINITY_DN86809_c0_g1|g.21753 ORF TRINITY_DN86809_c0_g1|g.21753 TRINITY_DN86809_c0_g1_m.21753 type:complete len:189 (+) TRINITY_DN86809_c0_g1:254-820(+)	1	0.00336099	71.066	GASLGSVSDEK(1)AR	2	-0.85173	1
	TRINITY_DN87062_c0_g1_m.21880	72	K	TRINITY_DN87062_c0_g1|g.21880 ORF TRINITY_DN87062_c0_g1|g.21880 TRINITY_DN87062_c0_g1_m.21880 type:5prime_partial len:154 (+) TRINITY_DN87062_c0_g1:2-463(+)	1	9.23737e-05	60.324	GQNVTVHCTGFGK(1)DGDLSK	3	0.13807	1
	TRINITY_DN87118_c0_g1_m.21905	524	K	TRINITY_DN87118_c0_g1|g.21905 ORF TRINITY_DN87118_c0_g1|g.21905 TRINITY_DN87118_c0_g1_m.21905 type:5prime_partial len:622 (+) TRINITY_DN87118_c0_g1:2-1867(+)	1	2.58595e-08	121.71	ITETQNK(1)VVITDR	2	-2.3695	1
	TRINITY_DN87266_c0_g1_m.21965	39	K	TRINITY_DN87266_c0_g1|g.21965 ORF TRINITY_DN87266_c0_g1|g.21965 TRINITY_DN87266_c0_g1_m.21965 type:complete len:528 (+) TRINITY_DN87266_c0_g1:257-1840(+)	1	0.000821576	98.009	IVGTLGPK(1)SR	2	0.077285	1
	TRINITY_DN87266_c0_g1_m.21965	503	K	TRINITY_DN87266_c0_g1|g.21965 ORF TRINITY_DN87266_c0_g1|g.21965 TRINITY_DN87266_c0_g1_m.21965 type:complete len:528 (+) TRINITY_DN87266_c0_g1:257-1840(+)	1	0.000376993	108.93	ASGVIK(1)THDR	2	-0.48844	1
	TRINITY_DN87266_c0_g1_m.21965	497	K	TRINITY_DN87266_c0_g1|g.21965 ORF TRINITY_DN87266_c0_g1|g.21965 TRINITY_DN87266_c0_g1_m.21965 type:complete len:528 (+) TRINITY_DN87266_c0_g1:257-1840(+)	1	0.00202146	86.243	VALEYGK(1)ASGVIK	2	3.0776	1
	TRINITY_DN87266_c0_g1_m.21965	381	K	TRINITY_DN87266_c0_g1|g.21965 ORF TRINITY_DN87266_c0_g1|g.21965 TRINITY_DN87266_c0_g1_m.21965 type:complete len:528 (+) TRINITY_DN87266_c0_g1:257-1840(+)	1	3.39106e-05	114.39	VFNHDLYFK(1)K	2	-1.417	1
	TRINITY_DN87266_c0_g1_m.21965	220	K	TRINITY_DN87266_c0_g1|g.21965 ORF TRINITY_DN87266_c0_g1|g.21965 TRINITY_DN87266_c0_g1_m.21965 type:complete len:528 (+) TRINITY_DN87266_c0_g1:257-1840(+)	1	4.85184e-07	112.93	NK(1)IDFLSLSYTR	2	0.70203	1
	TRINITY_DN87266_c0_g1_m.21965	302	K	TRINITY_DN87266_c0_g1|g.21965 ORF TRINITY_DN87266_c0_g1|g.21965 TRINITY_DN87266_c0_g1_m.21965 type:complete len:528 (+) TRINITY_DN87266_c0_g1:257-1840(+)	1	0.0175436	62.271	AAVYK(1)CNTSGK	2	-0.34586	1
	TRINITY_DN87266_c0_g1_m.21965	244	K	TRINITY_DN87266_c0_g1|g.21965 ORF TRINITY_DN87266_c0_g1|g.21965 TRINITY_DN87266_c0_g1_m.21965 type:complete len:528 (+) TRINITY_DN87266_c0_g1:257-1840(+)	1	1.0629e-09	100.69	DFLSK(1)LGELHQTQIFAK	3	1.364	1
	TRINITY_DN87266_c0_g1_m.21965	444	K	TRINITY_DN87266_c0_g1|g.21965 ORF TRINITY_DN87266_c0_g1|g.21965 TRINITY_DN87266_c0_g1_m.21965 type:complete len:528 (+) TRINITY_DN87266_c0_g1:257-1840(+)	1	0.0374545	72.492	LK(1)TNQLR	2	-0.70471	1
	TRINITY_DN87266_c0_g1_m.21965	264	K	TRINITY_DN87266_c0_g1|g.21965 ORF TRINITY_DN87266_c0_g1|g.21965 TRINITY_DN87266_c0_g1_m.21965 type:complete len:528 (+) TRINITY_DN87266_c0_g1:257-1840(+)	1	1.757e-11	121.54	IENIEGLK(1)HFDEILQEADGIILSR	3	0.56799	1
	TRINITY_DN87266_c0_g1_m.21965	31	K	TRINITY_DN87266_c0_g1|g.21965 ORF TRINITY_DN87266_c0_g1|g.21965 TRINITY_DN87266_c0_g1_m.21965 type:complete len:528 (+) TRINITY_DN87266_c0_g1:257-1840(+)	1	0.000127604	98.865	SSFFPSMTK(1)IVGTLGPK	2	2.9416	1
	TRINITY_DN87266_c0_g1_m.21965	140	K	TRINITY_DN87266_c0_g1|g.21965 ORF TRINITY_DN87266_c0_g1|g.21965 TRINITY_DN87266_c0_g1_m.21965 type:complete len:528 (+) TRINITY_DN87266_c0_g1:257-1840(+)	1	0.000118677	117.77	EASSELLPINFTGLAK(1)AVK	2	4.4861	1
	TRINITY_DN87266_c0_g1_m.21965	297	K	TRINITY_DN87266_c0_g1|g.21965 ORF TRINITY_DN87266_c0_g1|g.21965 TRINITY_DN87266_c0_g1_m.21965 type:complete len:528 (+) TRINITY_DN87266_c0_g1:257-1840(+)	1	4.67926e-05	81.642	VFLFQK(1)AAVYK	2	-0.97297	1
	TRINITY_DN87675_c1_g1_m.22141	97	K	TRINITY_DN87675_c1_g1|g.22141 ORF TRINITY_DN87675_c1_g1|g.22141 TRINITY_DN87675_c1_g1_m.22141 type:5prime_partial len:361 (+) TRINITY_DN87675_c1_g1:3-1085(+)	1	3.39554e-05	66.619	SAFVGK(1)LGNDDFGR	2	4.5211	1
	TRINITY_DN87675_c1_g1_m.22141	340	K	TRINITY_DN87675_c1_g1|g.22141 ORF TRINITY_DN87675_c1_g1|g.22141 TRINITY_DN87675_c1_g1_m.22141 type:5prime_partial len:361 (+) TRINITY_DN87675_c1_g1:3-1085(+)	1	0.0124916	48.822	FANACGAIATTK(1)K	2	-2.165	1
	TRINITY_DN87684_c0_g1_m.22148	339	K	TRINITY_DN87684_c0_g1|g.22148 ORF TRINITY_DN87684_c0_g1|g.22148 TRINITY_DN87684_c0_g1_m.22148 type:complete len:370 (+) TRINITY_DN87684_c0_g1:182-1291(+)	1	1.41719e-12	144.2	MSAMSSATDNAIELK(1)K	2	-1.0879	2
	TRINITY_DN87684_c0_g1_m.22148	64	K	TRINITY_DN87684_c0_g1|g.22148 ORF TRINITY_DN87684_c0_g1|g.22148 TRINITY_DN87684_c0_g1_m.22148 type:complete len:370 (+) TRINITY_DN87684_c0_g1:182-1291(+)	1	0.000171321	129.28	NTQK(1)ITEAMK	2	-4.6947	2
	TRINITY_DN87684_c0_g1_m.22148	70	K	TRINITY_DN87684_c0_g1|g.22148 ORF TRINITY_DN87684_c0_g1|g.22148 TRINITY_DN87684_c0_g1_m.22148 type:complete len:370 (+) TRINITY_DN87684_c0_g1:182-1291(+)	1	0.0150265	70.389	ITEAMK(1)LVAAAK	2	3.788	1
	TRINITY_DN87684_c0_g1_m.22148	76	K	TRINITY_DN87684_c0_g1|g.22148 ORF TRINITY_DN87684_c0_g1|g.22148 TRINITY_DN87684_c0_g1_m.22148 type:complete len:370 (+) TRINITY_DN87684_c0_g1:182-1291(+)	1	0.00021473	105.22	LVAAAK(1)VR	2	-0.030289	1
	TRINITY_DN87695_c0_g1_m.22151	80	K	TRINITY_DN87695_c0_g1|g.22151 ORF TRINITY_DN87695_c0_g1|g.22151 TRINITY_DN87695_c0_g1_m.22151 type:complete len:359 (+) TRINITY_DN87695_c0_g1:570-1646(+)	1	0.00886356	72.038	IATPK(1)EEMR	2	1.0012	1
	TRINITY_DN87731_c1_g1_m.22167	327	K	TRINITY_DN87731_c1_g1|g.22167 ORF TRINITY_DN87731_c1_g1|g.22167 TRINITY_DN87731_c1_g1_m.22167 type:complete len:435 (+) TRINITY_DN87731_c1_g1:172-1476(+)	1	0.0077708	61.48	SAEQAVK(1)GIK	2	-0.67446	1
	TRINITY_DN87731_c1_g1_m.22167	161	K	TRINITY_DN87731_c1_g1|g.22167 ORF TRINITY_DN87731_c1_g1|g.22167 TRINITY_DN87731_c1_g1_m.22167 type:complete len:435 (+) TRINITY_DN87731_c1_g1:172-1476(+)	1	0.041865	58.426	LVDAIQLK(1)K	2	-0.71812	1
	TRINITY_DN87731_c1_g1_m.22167	405	K	TRINITY_DN87731_c1_g1|g.22167 ORF TRINITY_DN87731_c1_g1|g.22167 TRINITY_DN87731_c1_g1_m.22167 type:complete len:435 (+) TRINITY_DN87731_c1_g1:172-1476(+)	1	0.00473269	49.487	VVGAFLESASPEENK(1)AISK	2	-1.7842	1
	TRINITY_DN88136_c0_g1_m.22361	46	K	TRINITY_DN88136_c0_g1|g.22361 ORF TRINITY_DN88136_c0_g1|g.22361 TRINITY_DN88136_c0_g1_m.22361 type:complete len:113 (+) TRINITY_DN88136_c0_g1:133-471(+)	1	0.000279097	69.276	DQCAHLLIPLNK(1)CR	3	-1.9625	1
	TRINITY_DN88351_c0_g1_m.22489	158	K	TRINITY_DN88351_c0_g1|g.22489 ORF TRINITY_DN88351_c0_g1|g.22489 TRINITY_DN88351_c0_g1_m.22489 type:complete len:179 (+) TRINITY_DN88351_c0_g1:164-700(+)	1	3.80735e-22	152.23	EAVSK(1)DEAEDAK	2	-0.56434	3
	TRINITY_DN88351_c0_g1_m.22489	165	K	TRINITY_DN88351_c0_g1|g.22489 ORF TRINITY_DN88351_c0_g1|g.22489 TRINITY_DN88351_c0_g1_m.22489 type:complete len:179 (+) TRINITY_DN88351_c0_g1:164-700(+)	1	1.7562e-10	115.35	EAVSKDEAEDAK(1)K	2	-2.8505	1
	TRINITY_DN88351_c0_g1_m.22489	142	K	TRINITY_DN88351_c0_g1|g.22489 ORF TRINITY_DN88351_c0_g1|g.22489 TRINITY_DN88351_c0_g1_m.22489 type:complete len:179 (+) TRINITY_DN88351_c0_g1:164-700(+)	1	0.0130412	56.202	EAK(1)ELIEGLPK	2	-1.0422	1
	TRINITY_DN88351_c0_g1_m.22489	167	K	TRINITY_DN88351_c0_g1|g.22489 ORF TRINITY_DN88351_c0_g1|g.22489 TRINITY_DN88351_c0_g1_m.22489 type:complete len:179 (+) TRINITY_DN88351_c0_g1:164-700(+)	0.917385	0.00177817	120.33	K(0.083)K(0.917)LEEVGAK	2	1.0789	1
	TRINITY_DN88351_c0_g1_m.22489	153	K	TRINITY_DN88351_c0_g1|g.22489 ORF TRINITY_DN88351_c0_g1|g.22489 TRINITY_DN88351_c0_g1_m.22489 type:complete len:179 (+) TRINITY_DN88351_c0_g1:164-700(+)	1	1.64701e-08	108.3	FK(1)EAVSK	2	0.95054	5
	TRINITY_DN88372_c0_g1_m.22502	88	K	TRINITY_DN88372_c0_g1|g.22502 ORF TRINITY_DN88372_c0_g1|g.22502 TRINITY_DN88372_c0_g1_m.22502 type:complete len:370 (+) TRINITY_DN88372_c0_g1:349-1458(+)	1	1.00792e-06	112.7	LLK(1)HLDHENVIGIR	3	-1.01	1
	TRINITY_DN88372_c0_g1_m.22502	270	K	TRINITY_DN88372_c0_g1|g.22502 ORF TRINITY_DN88372_c0_g1|g.22502 TRINITY_DN88372_c0_g1_m.22502 type:complete len:370 (+) TRINITY_DN88372_c0_g1:349-1458(+)	1	0.00258774	95.311	NEDAK(1)TYIR	2	1.268	1
	TRINITY_DN88372_c0_g1_m.22502	78	K	TRINITY_DN88372_c0_g1|g.22502 ORF TRINITY_DN88372_c0_g1|g.22502 TRINITY_DN88372_c0_g1_m.22502 type:complete len:370 (+) TRINITY_DN88372_c0_g1:349-1458(+)	1	6.18615e-05	51.569	IANAFDNHMDSK(1)R	2	-2.9587	1
	TRINITY_DN88390_c0_g1_m.22513	147	K	TRINITY_DN88390_c0_g1|g.22513 ORF TRINITY_DN88390_c0_g1|g.22513 TRINITY_DN88390_c0_g1_m.22513 type:complete len:165 (+) TRINITY_DN88390_c0_g1:234-728(+)	1	0.000289594	73.655	K(1)ELAEDIESLK	2	0.34921	1
	TRINITY_DN88390_c0_g1_m.22513	83	K	TRINITY_DN88390_c0_g1|g.22513 ORF TRINITY_DN88390_c0_g1|g.22513 TRINITY_DN88390_c0_g1_m.22513 type:complete len:165 (+) TRINITY_DN88390_c0_g1:234-728(+)	1	7.64411e-08	174.92	EK(1)WDSIENK	2	-0.57831	1
	TRINITY_DN88390_c0_g1_m.22513	157	K	TRINITY_DN88390_c0_g1|g.22513 ORF TRINITY_DN88390_c0_g1|g.22513 TRINITY_DN88390_c0_g1_m.22513 type:complete len:165 (+) TRINITY_DN88390_c0_g1:234-728(+)	1	2.47529e-28	195.58	ELAEDIESLK(1)K	2	-0.97172	1
	TRINITY_DN88390_c0_g1_m.22513	143	K	TRINITY_DN88390_c0_g1|g.22513 ORF TRINITY_DN88390_c0_g1|g.22513 TRINITY_DN88390_c0_g1_m.22513 type:complete len:165 (+) TRINITY_DN88390_c0_g1:234-728(+)	1	0.00206084	58.286	YLLFK(1)SSR	2	-1.8152	1
	TRINITY_DN88405_c0_g1_m.22523	95	K	TRINITY_DN88405_c0_g1|g.22523 ORF TRINITY_DN88405_c0_g1|g.22523 TRINITY_DN88405_c0_g1_m.22523 type:complete len:167 (+) TRINITY_DN88405_c0_g1:26-526(+)	1	0.00255599	49.097	DINPQAPTHILIIPK(1)VK	2	-0.71728	2
	TRINITY_DN88405_c0_g1_m.22523	97	K	TRINITY_DN88405_c0_g1|g.22523 ORF TRINITY_DN88405_c0_g1|g.22523 TRINITY_DN88405_c0_g1_m.22523 type:complete len:167 (+) TRINITY_DN88405_c0_g1:26-526(+)	1	0.0667957	57.888	VK(1)DGLTGLSK	2	0.16131	1
	TRINITY_DN88462_c0_g1_m.22559	271	K	TRINITY_DN88462_c0_g1|g.22559 ORF TRINITY_DN88462_c0_g1|g.22559 TRINITY_DN88462_c0_g1_m.22559 type:5prime_partial len:279 (+) TRINITY_DN88462_c0_g1:3-839(+)	1	0.0102755	79.059	LLAK(1)EAAQR	2	-0.12046	1
	TRINITY_DN88462_c0_g1_m.22559	241	K	TRINITY_DN88462_c0_g1|g.22559 ORF TRINITY_DN88462_c0_g1|g.22559 TRINITY_DN88462_c0_g1_m.22559 type:5prime_partial len:279 (+) TRINITY_DN88462_c0_g1:3-839(+)	1	0.00256363	66.664	ANFNDK(1)FDEIR	2	1.6454	1
	TRINITY_DN88462_c0_g1_m.22559	138	K	TRINITY_DN88462_c0_g1|g.22559 ORF TRINITY_DN88462_c0_g1|g.22559 TRINITY_DN88462_c0_g1_m.22559 type:5prime_partial len:279 (+) TRINITY_DN88462_c0_g1:3-839(+)	1	3.87021e-16	163.93	AQAETEGK(1)VVESK	2	-1.1381	1
	TRINITY_DN88462_c0_g1_m.22559	208	K	TRINITY_DN88462_c0_g1|g.22559 ORF TRINITY_DN88462_c0_g1|g.22559 TRINITY_DN88462_c0_g1_m.22559 type:5prime_partial len:279 (+) TRINITY_DN88462_c0_g1:3-839(+)	1	0.00660523	62.88	LGTIVHK(1)K	2	-0.35172	1
	TRINITY_DN88462_c0_g1_m.22559	143	K	TRINITY_DN88462_c0_g1|g.22559 ORF TRINITY_DN88462_c0_g1|g.22559 TRINITY_DN88462_c0_g1_m.22559 type:5prime_partial len:279 (+) TRINITY_DN88462_c0_g1:3-839(+)	0.977912	0.00786086	55.754	VVESK(0.978)K(0.022)PIVVK	2	-0.36368	1
	TRINITY_DN88487_c0_g1_m.22575	312	K	TRINITY_DN88487_c0_g1|g.22575 ORF TRINITY_DN88487_c0_g1|g.22575 TRINITY_DN88487_c0_g1_m.22575 type:complete len:398 (+) TRINITY_DN88487_c0_g1:128-1321(+)	1	0.0254229	70.806	YVNVPFPIAK(1)AIASPR	2	2.1276	1
	TRINITY_DN88487_c0_g1_m.22575	196	K	TRINITY_DN88487_c0_g1|g.22575 ORF TRINITY_DN88487_c0_g1|g.22575 TRINITY_DN88487_c0_g1_m.22575 type:complete len:398 (+) TRINITY_DN88487_c0_g1:128-1321(+)	1	0.00124812	96.946	TK(1)AASEESVLR	2	-0.40017	1
	TRINITY_DN88539_c0_g1_m.22591	34	K	TRINITY_DN88539_c0_g1|g.22591 ORF TRINITY_DN88539_c0_g1|g.22591 TRINITY_DN88539_c0_g1_m.22591 type:complete len:117 (+) TRINITY_DN88539_c0_g1:160-510(+)	1	0.00155767	90.761	AAENVYIK(1)K	2	-0.33997	1
	TRINITY_DN88552_c0_g1_m.22596	127	K	TRINITY_DN88552_c0_g1|g.22596 ORF TRINITY_DN88552_c0_g1|g.22596 TRINITY_DN88552_c0_g1_m.22596 type:complete len:148 (+) TRINITY_DN88552_c0_g1:339-782(+)	1	1.80472e-05	88.734	DNTMEDILTQLK(1)K	2	0.027111	1
	TRINITY_DN88589_c0_g1_m.22620	108	K	TRINITY_DN88589_c0_g1|g.22620 ORF TRINITY_DN88589_c0_g1|g.22620 TRINITY_DN88589_c0_g1_m.22620 type:complete len:130 (+) TRINITY_DN88589_c0_g1:68-457(+)	1	0.00206084	78.178	VIASNK(1)DR	2	0.013921	1
	TRINITY_DN88589_c0_g1_m.22620	54	K	TRINITY_DN88589_c0_g1|g.22620 ORF TRINITY_DN88589_c0_g1|g.22620 TRINITY_DN88589_c0_g1_m.22620 type:complete len:130 (+) TRINITY_DN88589_c0_g1:68-457(+)	1	4.73582e-06	89.489	VASLGGK(1)AGTLGDVVNVTR	2	-2.5095	1
	TRINITY_DN88589_c0_g1_m.22620	47	K	TRINITY_DN88589_c0_g1|g.22620 ORF TRINITY_DN88589_c0_g1|g.22620 TRINITY_DN88589_c0_g1_m.22620 type:complete len:130 (+) TRINITY_DN88589_c0_g1:68-457(+)	1	0.0122483	58.916	IK(1)VASLGGK	2	0.053535	1
	TRINITY_DN88657_c0_g1_m.22651	74	K	TRINITY_DN88657_c0_g1|g.22651 ORF TRINITY_DN88657_c0_g1|g.22651 TRINITY_DN88657_c0_g1_m.22651 type:5prime_partial len:444 (+) TRINITY_DN88657_c0_g1:2-1333(+)	1	0.000127778	136.94	TNLELESFK(1)EK	2	3.4538	1
	TRINITY_DN88657_c0_g1_m.22651	60	K	TRINITY_DN88657_c0_g1|g.22651 ORF TRINITY_DN88657_c0_g1|g.22651 TRINITY_DN88657_c0_g1_m.22651 type:5prime_partial len:444 (+) TRINITY_DN88657_c0_g1:2-1333(+)	1	0.0564266	47.349	VLK(1)DELQR	2	0.41727	1
	TRINITY_DN88657_c0_g1_m.22651	83	K	TRINITY_DN88657_c0_g1|g.22651 ORF TRINITY_DN88657_c0_g1|g.22651 TRINITY_DN88657_c0_g1_m.22651 type:5prime_partial len:444 (+) TRINITY_DN88657_c0_g1:2-1333(+)	0.999684	0.0275848	55.235	IKENQEK(1)IK	2	0.68993	1
	TRINITY_DN88657_c0_g1_m.22651	150	K	TRINITY_DN88657_c0_g1|g.22651 ORF TRINITY_DN88657_c0_g1|g.22651 TRINITY_DN88657_c0_g1_m.22651 type:5prime_partial len:444 (+) TRINITY_DN88657_c0_g1:2-1333(+)	1	0.0180078	44.82	LK(1)PGDLVGVNK	2	-4.0137	1
	TRINITY_DN88657_c0_g1_m.22651	331	K	TRINITY_DN88657_c0_g1|g.22651 ORF TRINITY_DN88657_c0_g1|g.22651 TRINITY_DN88657_c0_g1_m.22651 type:5prime_partial len:444 (+) TRINITY_DN88657_c0_g1:2-1333(+)	1	0.00272888	60.892	IK(1)VIAATNR	2	0.06617	1
	TRINITY_DN88684_c0_g1_m.22672	627	K	TRINITY_DN88684_c0_g1|g.22672 ORF TRINITY_DN88684_c0_g1|g.22672 TRINITY_DN88684_c0_g1_m.22672 type:5prime_partial len:686 (+) TRINITY_DN88684_c0_g1:3-2060(+)	1	0.0181586	64.266	TQYSFSHIPAK(1)K	2	2.0085	1
	TRINITY_DN88684_c0_g1_m.22672	303	K	TRINITY_DN88684_c0_g1|g.22672 ORF TRINITY_DN88684_c0_g1|g.22672 TRINITY_DN88684_c0_g1_m.22672 type:5prime_partial len:686 (+) TRINITY_DN88684_c0_g1:3-2060(+)	1	5.04421e-17	171.09	ITVGQGPEEK(1)GMVR	2	-3.3402	2
	TRINITY_DN88684_c0_g1_m.22672	455	K	TRINITY_DN88684_c0_g1|g.22672 ORF TRINITY_DN88684_c0_g1|g.22672 TRINITY_DN88684_c0_g1_m.22672 type:5prime_partial len:686 (+) TRINITY_DN88684_c0_g1:3-2060(+)	1	0.000104758	78.157	ALK(1)MHGGGPEVVAGR	2	-2.0227	2
	TRINITY_DN88684_c0_g1_m.22672	266	K	TRINITY_DN88684_c0_g1|g.22672 ORF TRINITY_DN88684_c0_g1|g.22672 TRINITY_DN88684_c0_g1_m.22672 type:5prime_partial len:686 (+) TRINITY_DN88684_c0_g1:3-2060(+)	1	2.33842e-05	112.7	TNPDDLTPEEVK(1)R	2	-0.11625	1
	TRINITY_DN88684_c0_g1_m.22672	561	K	TRINITY_DN88684_c0_g1|g.22672 ORF TRINITY_DN88684_c0_g1|g.22672 TRINITY_DN88684_c0_g1_m.22672 type:5prime_partial len:686 (+) TRINITY_DN88684_c0_g1:3-2060(+)	1	0.00113473	83.358	ACESHSK(1)PLK	2	-0.2772	1
	TRINITY_DN88684_c0_g1_m.22672	103	K	TRINITY_DN88684_c0_g1|g.22672 ORF TRINITY_DN88684_c0_g1|g.22672 TRINITY_DN88684_c0_g1_m.22672 type:5prime_partial len:686 (+) TRINITY_DN88684_c0_g1:3-2060(+)	1	0.0122788	58.476	AK(1)VLLSVLDELK	2	-0.059479	1
	TRINITY_DN88684_c0_g1_m.22672	434	K	TRINITY_DN88684_c0_g1|g.22672 ORF TRINITY_DN88684_c0_g1|g.22672 TRINITY_DN88684_c0_g1_m.22672 type:5prime_partial len:686 (+) TRINITY_DN88684_c0_g1:3-2060(+)	1	0.0226036	70.67	FMNIK(1)SR	2	0.4327	1
	TRINITY_DN88684_c0_g1_m.22672	254	K	TRINITY_DN88684_c0_g1|g.22672 ORF TRINITY_DN88684_c0_g1|g.22672 TRINITY_DN88684_c0_g1_m.22672 type:5prime_partial len:686 (+) TRINITY_DN88684_c0_g1:3-2060(+)	1	3.59992e-06	97.949	LGISK(1)TNPDDLTPEEVK	2	-2.68	2
	TRINITY_DN88684_c0_g1_m.22672	574	K	TRINITY_DN88684_c0_g1|g.22672 ORF TRINITY_DN88684_c0_g1|g.22672 TRINITY_DN88684_c0_g1_m.22672 type:5prime_partial len:686 (+) TRINITY_DN88684_c0_g1:3-2060(+)	1	0.000944083	54.584	FLYPLDLSIK(1)EK	2	1.603	1
	TRINITY_DN88722_c0_g1_m.22699	123	K	TRINITY_DN88722_c0_g1|g.22699 ORF TRINITY_DN88722_c0_g1|g.22699 TRINITY_DN88722_c0_g1_m.22699 type:complete len:185 (+) TRINITY_DN88722_c0_g1:3109-3663(+)	1	0.0077708	53.517	FFLK(1)DIQSIR	2	2.4725	1
	TRINITY_DN88727_c0_g1_m.22702	398	K	TRINITY_DN88727_c0_g1|g.22702 ORF TRINITY_DN88727_c0_g1|g.22702 TRINITY_DN88727_c0_g1_m.22702 type:complete len:472 (+) TRINITY_DN88727_c0_g1:180-1595(+)	1	0.0386068	54.199	LYEVVPPILTELGK(1)VK	2	2.3218	1
	TRINITY_DN88727_c0_g1_m.22702	371	K	TRINITY_DN88727_c0_g1|g.22702 ORF TRINITY_DN88727_c0_g1|g.22702 TRINITY_DN88727_c0_g1_m.22702 type:complete len:472 (+) TRINITY_DN88727_c0_g1:180-1595(+)	1	3.40115e-05	104.86	EFALK(1)HLPDDPLFQLVSK	3	1.3438	1
	TRINITY_DN88727_c0_g1_m.22702	455	K	TRINITY_DN88727_c0_g1|g.22702 ORF TRINITY_DN88727_c0_g1|g.22702 TRINITY_DN88727_c0_g1_m.22702 type:complete len:472 (+) TRINITY_DN88727_c0_g1:180-1595(+)	1	6.47372e-18	168.43	PK(1)SVTMDWLENHCK	2	-5.0001	2
	TRINITY_DN88727_c0_g1_m.22702	58	K	TRINITY_DN88727_c0_g1|g.22702 ORF TRINITY_DN88727_c0_g1|g.22702 TRINITY_DN88727_c0_g1_m.22702 type:complete len:472 (+) TRINITY_DN88727_c0_g1:180-1595(+)	1	0.0736863	49.96	LK(1)TDHGK	2	0.018676	1
	TRINITY_DN88727_c0_g1_m.22702	345	K	TRINITY_DN88727_c0_g1|g.22702 ORF TRINITY_DN88727_c0_g1|g.22702 TRINITY_DN88727_c0_g1_m.22702 type:complete len:472 (+) TRINITY_DN88727_c0_g1:180-1595(+)	1	0.000313321	81.799	SGK(1)VVPGYGHGVLR	2	-1.5569	1
	TRINITY_DN88727_c0_g1_m.22702	137	K	TRINITY_DN88727_c0_g1|g.22702 ORF TRINITY_DN88727_c0_g1|g.22702 TRINITY_DN88727_c0_g1_m.22702 type:complete len:472 (+) TRINITY_DN88727_c0_g1:180-1595(+)	1	0.000845142	81.48	VPSK(1)EQVDALSK	2	-1.1795	1
	TRINITY_DN88727_c0_g1_m.22702	145	K	TRINITY_DN88727_c0_g1|g.22702 ORF TRINITY_DN88727_c0_g1|g.22702 TRINITY_DN88727_c0_g1_m.22702 type:complete len:472 (+) TRINITY_DN88727_c0_g1:180-1595(+)	1	7.63953e-65	316.12	EQVDALSK(1)ELHIR	2	-3.4845	2
	TRINITY_DN88727_c0_g1_m.22702	255	K	TRINITY_DN88727_c0_g1|g.22702 ORF TRINITY_DN88727_c0_g1|g.22702 TRINITY_DN88727_c0_g1_m.22702 type:complete len:472 (+) TRINITY_DN88727_c0_g1:180-1595(+)	1	4.54707e-12	136.06	MLGFDDPK(1)MQELMR	2	4.2474	1
	TRINITY_DN88811_c0_g1_m.22750	76	K	TRINITY_DN88811_c0_g1|g.22750 ORF TRINITY_DN88811_c0_g1|g.22750 TRINITY_DN88811_c0_g1_m.22750 type:5prime_partial len:309 (+) TRINITY_DN88811_c0_g1:2-928(+)	1	0.0166359	69.905	LK(1)TFSIYR	2	-1.4445	1
	TRINITY_DN88811_c0_g1_m.22750	263	K	TRINITY_DN88811_c0_g1|g.22750 ORF TRINITY_DN88811_c0_g1|g.22750 TRINITY_DN88811_c0_g1_m.22750 type:5prime_partial len:309 (+) TRINITY_DN88811_c0_g1:2-928(+)	1	0.00435283	117.18	DQYTK(1)ER	2	1.2383	1
	TRINITY_DN88811_c0_g1_m.22750	193	K	TRINITY_DN88811_c0_g1|g.22750 ORF TRINITY_DN88811_c0_g1|g.22750 TRINITY_DN88811_c0_g1_m.22750 type:5prime_partial len:309 (+) TRINITY_DN88811_c0_g1:2-928(+)	1	0.0206992	70.67	SVEPWLK(1)R	2	-0.92915	1
	TRINITY_DN88811_c0_g1_m.22750	115	K	TRINITY_DN88811_c0_g1|g.22750 ORF TRINITY_DN88811_c0_g1|g.22750 TRINITY_DN88811_c0_g1_m.22750 type:5prime_partial len:309 (+) TRINITY_DN88811_c0_g1:2-928(+)	1	7.37747e-05	75.474	IK(1)NEMDPSLTFR	2	0.35071	2
	TRINITY_DN89071_c0_g1_m.22902	238	K	TRINITY_DN89071_c0_g1|g.22902 ORF TRINITY_DN89071_c0_g1|g.22902 TRINITY_DN89071_c0_g1_m.22902 type:complete len:312 (+) TRINITY_DN89071_c0_g1:107-1042(+)	1	0.000851662	77.358	SDGDYGAAK(1)VMLR	2	1.9447	1
	TRINITY_DN89071_c0_g1_m.22902	206	K	TRINITY_DN89071_c0_g1|g.22902 ORF TRINITY_DN89071_c0_g1|g.22902 TRINITY_DN89071_c0_g1_m.22902 type:complete len:312 (+) TRINITY_DN89071_c0_g1:107-1042(+)	1	0.000761922	82.437	EVVDAIVK(1)SSTNAR	2	-3.7464	1
	TRINITY_DN89077_c0_g1_m.22903	60	K	TRINITY_DN89077_c0_g1|g.22903 ORF TRINITY_DN89077_c0_g1|g.22903 TRINITY_DN89077_c0_g1_m.22903 type:complete len:278 (+) TRINITY_DN89077_c0_g1:98-931(+)	1	0.00198596	98.009	QLSHNVAK(1)FR	2	-1.7447	1
	TRINITY_DN89147_c0_g1_m.22936	66	K	TRINITY_DN89147_c0_g1|g.22936 ORF TRINITY_DN89147_c0_g1|g.22936 TRINITY_DN89147_c0_g1_m.22936 type:complete len:306 (+) TRINITY_DN89147_c0_g1:131-1048(+)	1	0.0655558	46.033	GGSK(1)VVVQPHR	2	0.70633	1
	TRINITY_DN89147_c0_g1_m.22936	113	K	TRINITY_DN89147_c0_g1|g.22936 ORF TRINITY_DN89147_c0_g1|g.22936 TRINITY_DN89147_c0_g1_m.22936 type:complete len:306 (+) TRINITY_DN89147_c0_g1:131-1048(+)	1	7.24143e-06	96.313	VSVQNEDGTK(1)VEYR	2	-3.1022	1
	TRINITY_DN89246_c0_g1_m.22998	249	K	TRINITY_DN89246_c0_g1|g.22998 ORF TRINITY_DN89246_c0_g1|g.22998 TRINITY_DN89246_c0_g1_m.22998 type:complete len:286 (+) TRINITY_DN89246_c0_g1:84-941(+)	1	0.000702223	68.548	ISPATFDK(1)VFNDR	2	0.42658	1
	TRINITY_DN89367_c0_g1_m.23087	225	K	TRINITY_DN89367_c0_g1|g.23087 ORF TRINITY_DN89367_c0_g1|g.23087 TRINITY_DN89367_c0_g1_m.23087 type:complete len:283 (+) TRINITY_DN89367_c0_g1:122-970(+)	1	0.0195585	53.878	YEALGK(1)TR	2	-9.2188	1
	TRINITY_DN89536_c0_g1_m.23193	54	K	TRINITY_DN89536_c0_g1|g.23193 ORF TRINITY_DN89536_c0_g1|g.23193 TRINITY_DN89536_c0_g1_m.23193 type:5prime_partial len:414 (+) TRINITY_DN89536_c0_g1:2-1243(+)	1	1.36508e-09	97.594	IYVVDVLTDPK(1)APALHK	2	-0.35654	2
	TRINITY_DN89659_c0_g1_m.23268	342	K	TRINITY_DN89659_c0_g1|g.23268 ORF TRINITY_DN89659_c0_g1|g.23268 TRINITY_DN89659_c0_g1_m.23268 type:5prime_partial len:346 (+) TRINITY_DN89659_c0_g1:3-1040(+)	1	0.0387188	46.802	EAAAK(1)VR	2	0.33011	1
	TRINITY_DN89659_c0_g1_m.23268	135	K	TRINITY_DN89659_c0_g1|g.23268 ORF TRINITY_DN89659_c0_g1|g.23268 TRINITY_DN89659_c0_g1_m.23268 type:5prime_partial len:346 (+) TRINITY_DN89659_c0_g1:3-1040(+)	1	1.47872e-05	94.507	AAVSK(1)GIEVVSVSR	2	3.703	1
	TRINITY_DN89948_c0_g1_m.23460	415	K	TRINITY_DN89948_c0_g1|g.23460 ORF TRINITY_DN89948_c0_g1|g.23460 TRINITY_DN89948_c0_g1_m.23460 type:complete len:526 (+) TRINITY_DN89948_c0_g1:62-1639(+)	1	0.00608949	89.123	IK(1)ELINR	2	-1.716	1
	TRINITY_DN90034_c0_g1_m.23519	356	K	TRINITY_DN90034_c0_g1|g.23519 ORF TRINITY_DN90034_c0_g1|g.23519 TRINITY_DN90034_c0_g1_m.23519 type:complete len:397 (+) TRINITY_DN90034_c0_g1:163-1353(+)	1	0.00779376	70.389	LAK(1)RPENTGK	2	-1.0423	1
	TRINITY_DN90034_c0_g1_m.23519	205	K	TRINITY_DN90034_c0_g1|g.23519 ORF TRINITY_DN90034_c0_g1|g.23519 TRINITY_DN90034_c0_g1_m.23519 type:complete len:397 (+) TRINITY_DN90034_c0_g1:163-1353(+)	1	0.00014991	110.88	GAVQK(1)AEEILK	2	-1.8614	1
	TRINITY_DN90034_c0_g1_m.23519	200	K	TRINITY_DN90034_c0_g1|g.23519 ORF TRINITY_DN90034_c0_g1|g.23519 TRINITY_DN90034_c0_g1_m.23519 type:complete len:397 (+) TRINITY_DN90034_c0_g1:163-1353(+)	1	0.00849935	70.67	GMK(1)GAVQK	2	-0.06423	1
	TRINITY_DN90034_c0_g1_m.23519	120	K	TRINITY_DN90034_c0_g1|g.23519 ORF TRINITY_DN90034_c0_g1|g.23519 TRINITY_DN90034_c0_g1_m.23519 type:complete len:397 (+) TRINITY_DN90034_c0_g1:163-1353(+)	1	0.0012224	50.116	LEIMEPCCSVK(1)DR	2	-1.9067	1
	TRINITY_DN90034_c0_g1_m.23519	291	K	TRINITY_DN90034_c0_g1|g.23519 ORF TRINITY_DN90034_c0_g1|g.23519 TRINITY_DN90034_c0_g1_m.23519 type:complete len:397 (+) TRINITY_DN90034_c0_g1:163-1353(+)	1	4.7643e-05	90.376	VIGIEPAESNILSGGK(1)PGPHK	3	-1.0998	1
	TRINITY_DN90075_c0_g1_m.23577	363	K	TRINITY_DN90075_c0_g1|g.23577 ORF TRINITY_DN90075_c0_g1|g.23577 TRINITY_DN90075_c0_g1_m.23577 type:complete len:522 (+) TRINITY_DN90075_c0_g1:106-1671(+)	1	1.7394e-05	93.649	SSGSGK(1)HTGSELVQR	2	-2.6834	2
	TRINITY_DN90075_c0_g1_m.23577	483	K	TRINITY_DN90075_c0_g1|g.23577 ORF TRINITY_DN90075_c0_g1|g.23577 TRINITY_DN90075_c0_g1_m.23577 type:complete len:522 (+) TRINITY_DN90075_c0_g1:106-1671(+)	1	0.000831176	97.277	IDAVDPSTVK(1)R	2	0.26051	1
	TRINITY_DN90075_c0_g1_m.23577	292	K	TRINITY_DN90075_c0_g1|g.23577 ORF TRINITY_DN90075_c0_g1|g.23577 TRINITY_DN90075_c0_g1_m.23577 type:complete len:522 (+) TRINITY_DN90075_c0_g1:106-1671(+)	1	9.79829e-10	150.85	QFTK(1)LSADPTTATQLVAR	2	-2.5189	1
	TRINITY_DN90075_c0_g1_m.23577	287	K	TRINITY_DN90075_c0_g1|g.23577 ORF TRINITY_DN90075_c0_g1|g.23577 TRINITY_DN90075_c0_g1_m.23577 type:complete len:522 (+) TRINITY_DN90075_c0_g1:106-1671(+)	1	6.80604e-09	158.57	HEEIVELVK(1)K	2	1.5692	1
	TRINITY_DN90075_c0_g1_m.23577	249	K	TRINITY_DN90075_c0_g1|g.23577 ORF TRINITY_DN90075_c0_g1|g.23577 TRINITY_DN90075_c0_g1_m.23577 type:complete len:522 (+) TRINITY_DN90075_c0_g1:106-1671(+)	1	3.07866e-05	104.04	TILGSSQNIK(1)TITK	2	-2.5982	1
	TRINITY_DN90075_c0_g1_m.23577	257	K	TRINITY_DN90075_c0_g1|g.23577 ORF TRINITY_DN90075_c0_g1|g.23577 TRINITY_DN90075_c0_g1_m.23577 type:complete len:522 (+) TRINITY_DN90075_c0_g1:106-1671(+)	1	8.18815e-09	93.649	DHLK(1)NYISTHYTAPR	3	2.0285	2
	TRINITY_DN90075_c0_g1_m.23577	54	K	TRINITY_DN90075_c0_g1|g.23577 ORF TRINITY_DN90075_c0_g1|g.23577 TRINITY_DN90075_c0_g1_m.23577 type:complete len:522 (+) TRINITY_DN90075_c0_g1:106-1671(+)	1	0.00701728	59.645	LSEAVSAK(1)IK	2	-0.65363	1
	TRINITY_DN90082_c0_g1_m.23588	109	K	TRINITY_DN90082_c0_g1|g.23588 ORF TRINITY_DN90082_c0_g1|g.23588 TRINITY_DN90082_c0_g1_m.23588 type:complete len:318 (+) TRINITY_DN90082_c0_g1:44-997(+)	1	0.00329331	54.199	LK(1)GYPEEEVQEAR	2	-0.85292	1
	TRINITY_DN90114_c0_g2_m.23616	124	K	TRINITY_DN90114_c0_g2|g.23616 ORF TRINITY_DN90114_c0_g2|g.23616 TRINITY_DN90114_c0_g2_m.23616 type:complete len:372 (+) TRINITY_DN90114_c0_g2:246-1361(+)	1	0.0010758	96.957	LK(1)HDNFVELR	2	-1.7741	1
	TRINITY_DN90204_c1_g1_m.23698	99	K	TRINITY_DN90204_c1_g1|g.23698 ORF TRINITY_DN90204_c1_g1|g.23698 TRINITY_DN90204_c1_g1_m.23698 type:complete len:150 (+) TRINITY_DN90204_c1_g1:67-516(+)	1	1.57979e-09	85.742	VAK(1)AVISQVADNHYRPDLK	3	0.27399	1
	TRINITY_DN90204_c1_g1_m.23698	115	K	TRINITY_DN90204_c1_g1|g.23698 ORF TRINITY_DN90204_c1_g1|g.23698 TRINITY_DN90204_c1_g1_m.23698 type:complete len:150 (+) TRINITY_DN90204_c1_g1:67-516(+)	1	6.42815e-10	115.79	AVISQVADNHYRPDLK(1)K	3	0.87304	2
	TRINITY_DN90210_c0_g1_m.23704	53	K	TRINITY_DN90210_c0_g1|g.23704 ORF TRINITY_DN90210_c0_g1|g.23704 TRINITY_DN90210_c0_g1_m.23704 type:complete len:187 (+) TRINITY_DN90210_c0_g1:166-726(+)	0.954752	0.029002	60.734	K(0.045)TELQPK(0.955)VLEIYEASSTEIK	3	-1.2572	1
	TRINITY_DN90210_c0_g1_m.23704	36	K	TRINITY_DN90210_c0_g1|g.23704 ORF TRINITY_DN90210_c0_g1|g.23704 TRINITY_DN90210_c0_g1_m.23704 type:complete len:187 (+) TRINITY_DN90210_c0_g1:166-726(+)	1	3.42629e-22	167.76	SFDDSK(1)EEINK	2	-0.3673	3
	TRINITY_DN90210_c0_g1_m.23704	30	K	TRINITY_DN90210_c0_g1|g.23704 ORF TRINITY_DN90210_c0_g1|g.23704 TRINITY_DN90210_c0_g1_m.23704 type:complete len:187 (+) TRINITY_DN90210_c0_g1:166-726(+)	1	3.21114e-27	164.22	AAAEASK(1)SFDDSK	2	-0.67091	3
	TRINITY_DN90210_c0_g1_m.23704	100	K	TRINITY_DN90210_c0_g1|g.23704 ORF TRINITY_DN90210_c0_g1|g.23704 TRINITY_DN90210_c0_g1_m.23704 type:complete len:187 (+) TRINITY_DN90210_c0_g1:166-726(+)	1	0.000712146	81.908	IDFPGSK(1)PVSDAVSK	2	-0.23531	1
	TRINITY_DN90210_c0_g1_m.23704	78	K	TRINITY_DN90210_c0_g1|g.23704 ORF TRINITY_DN90210_c0_g1|g.23704 TRINITY_DN90210_c0_g1_m.23704 type:complete len:187 (+) TRINITY_DN90210_c0_g1:166-726(+)	1	0.00579814	92.677	HEAGVK(1)K	2	2.0358	1
	TRINITY_DN90210_c0_g1_m.23704	41	K	TRINITY_DN90210_c0_g1|g.23704 ORF TRINITY_DN90210_c0_g1|g.23704 TRINITY_DN90210_c0_g1_m.23704 type:complete len:187 (+) TRINITY_DN90210_c0_g1:166-726(+)	1	2.23221e-12	162.52	EEINK(1)ELEEK	2	1.2918	3
	TRINITY_DN90232_c0_g1_m.23727	228	K	TRINITY_DN90232_c0_g1|g.23727 ORF TRINITY_DN90232_c0_g1|g.23727 TRINITY_DN90232_c0_g1_m.23727 type:complete len:286 (+) TRINITY_DN90232_c0_g1:334-1191(+)	1	0.0100506	54.584	ILDGK(1)ELEFYK	2	-3.9568	1
	TRINITY_DN90251_c0_g1_m.23745	170	K	TRINITY_DN90251_c0_g1|g.23745 ORF TRINITY_DN90251_c0_g1|g.23745 TRINITY_DN90251_c0_g1_m.23745 type:complete len:486 (+) TRINITY_DN90251_c0_g1:94-1551(+)	1	0.0568691	58.286	LK(1)VEPER	2	-1.0579	1
	TRINITY_DN90397_c0_g1_m.23857	69	K	TRINITY_DN90397_c0_g1|g.23857 ORF TRINITY_DN90397_c0_g1|g.23857 TRINITY_DN90397_c0_g1_m.23857 type:complete len:190 (+) TRINITY_DN90397_c0_g1:154-723(+)	1	0.00883614	41.824	MHVK(1)VGDTVK	2	-2.2787	1
	TRINITY_DN90397_c0_g1_m.23857	138	K	TRINITY_DN90397_c0_g1|g.23857 ORF TRINITY_DN90397_c0_g1|g.23857 TRINITY_DN90397_c0_g1_m.23857 type:complete len:190 (+) TRINITY_DN90397_c0_g1:154-723(+)	1	2.54481e-11	113.13	IEAPIHSSNVMLYSK(1)EQNVASR	3	3.6832	1
	TRINITY_DN90459_c0_g1_m.23908	94	K	TRINITY_DN90459_c0_g1|g.23908 ORF TRINITY_DN90459_c0_g1|g.23908 TRINITY_DN90459_c0_g1_m.23908 type:complete len:363 (+) TRINITY_DN90459_c0_g1:209-1297(+)	1	0.00157941	55.754	YQK(1)LYEPLYTK	2	0.65054	1
	TRINITY_DN90459_c0_g1_m.23908	91	K	TRINITY_DN90459_c0_g1|g.23908 ORF TRINITY_DN90459_c0_g1|g.23908 TRINITY_DN90459_c0_g1_m.23908 type:complete len:363 (+) TRINITY_DN90459_c0_g1:209-1297(+)	1	0.000454095	94.806	AALEAK(1)YQK	2	-1.5766	1
	TRINITY_DN90459_c0_g1_m.23908	171	K	TRINITY_DN90459_c0_g1|g.23908 ORF TRINITY_DN90459_c0_g1|g.23908 TRINITY_DN90459_c0_g1_m.23908 type:complete len:363 (+) TRINITY_DN90459_c0_g1:209-1297(+)	1	0.0486545	44.82	WSK(1)LNDPK	2	-0.12346	1
	TRINITY_DN90459_c0_g1_m.23908	176	K	TRINITY_DN90459_c0_g1|g.23908 ORF TRINITY_DN90459_c0_g1|g.23908 TRINITY_DN90459_c0_g1_m.23908 type:complete len:363 (+) TRINITY_DN90459_c0_g1:209-1297(+)	1	0.00764062	69.905	LNDPK(1)GFK	2	-0.0015906	1
	TRINITY_DN90471_c0_g1_m.23922	149	K	TRINITY_DN90471_c0_g1|g.23922 ORF TRINITY_DN90471_c0_g1|g.23922 TRINITY_DN90471_c0_g1_m.23922 type:complete len:392 (+) TRINITY_DN90471_c0_g1:183-1358(+)	1	0.000145136	57.003	TPHLDGK(1)HVVFGK	2	-0.67382	1
	TRINITY_DN90546_c1_g1_m.23968	274	K	TRINITY_DN90546_c1_g1|g.23968 ORF TRINITY_DN90546_c1_g1|g.23968 TRINITY_DN90546_c1_g1_m.23968 type:5prime_partial len:335 (+) TRINITY_DN90546_c1_g1:1-1005(+)	1	1.3578e-12	150.53	QAEEGK(1)VAIR	2	-0.57164	1
	TRINITY_DN90546_c1_g1_m.23968	225	K	TRINITY_DN90546_c1_g1|g.23968 ORF TRINITY_DN90546_c1_g1|g.23968 TRINITY_DN90546_c1_g1_m.23968 type:5prime_partial len:335 (+) TRINITY_DN90546_c1_g1:1-1005(+)	1	0.0115883	62.969	SSLK(1)VIEK	2	-1.2816	1
	TRINITY_DN90546_c1_g1_m.23968	229	K	TRINITY_DN90546_c1_g1|g.23968 ORF TRINITY_DN90546_c1_g1|g.23968 TRINITY_DN90546_c1_g1_m.23968 type:5prime_partial len:335 (+) TRINITY_DN90546_c1_g1:1-1005(+)	1	0.0307993	53.878	VIEK(1)AIVR	2	0.055472	1
	TRINITY_DN90546_c1_g1_m.23968	303	K	TRINITY_DN90546_c1_g1|g.23968 ORF TRINITY_DN90546_c1_g1|g.23968 TRINITY_DN90546_c1_g1_m.23968 type:5prime_partial len:335 (+) TRINITY_DN90546_c1_g1:1-1005(+)	1	0.000123347	90.156	LSEDNVK(1)DLSSDLQK	2	-3.1799	1
	TRINITY_DN90546_c1_g1_m.23968	268	K	TRINITY_DN90546_c1_g1|g.23968 ORF TRINITY_DN90546_c1_g1|g.23968 TRINITY_DN90546_c1_g1_m.23968 type:5prime_partial len:335 (+) TRINITY_DN90546_c1_g1:1-1005(+)	1	0.0330312	47.561	LVAK(1)QAEEGK	2	0.062286	1
	TRINITY_DN90546_c1_g1_m.23968	325	K	TRINITY_DN90546_c1_g1|g.23968 ORF TRINITY_DN90546_c1_g1|g.23968 TRINITY_DN90546_c1_g1_m.23968 type:5prime_partial len:335 (+) TRINITY_DN90546_c1_g1:1-1005(+)	0.999968	0.0359459	59.645	KLDSLLK(1)QK	2	0.56817	1
	TRINITY_DN90546_c1_g1_m.23968	290	K	TRINITY_DN90546_c1_g1|g.23968 ORF TRINITY_DN90546_c1_g1|g.23968 TRINITY_DN90546_c1_g1_m.23968 type:5prime_partial len:335 (+) TRINITY_DN90546_c1_g1:1-1005(+)	1	0.0222797	58.286	AYEK(1)LEK	2	-0.33321	1
	TRINITY_DN90641_c0_g1_m.24034	445	K	TRINITY_DN90641_c0_g1|g.24034 ORF TRINITY_DN90641_c0_g1|g.24034 TRINITY_DN90641_c0_g1_m.24034 type:complete len:462 (+) TRINITY_DN90641_c0_g1:324-1709(+)	1	0.00211677	74.486	DHK(1)WAWLR	2	-0.92866	1
	TRINITY_DN90641_c0_g1_m.24034	442	K	TRINITY_DN90641_c0_g1|g.24034 ORF TRINITY_DN90641_c0_g1|g.24034 TRINITY_DN90641_c0_g1_m.24034 type:complete len:462 (+) TRINITY_DN90641_c0_g1:324-1709(+)	1	0.0533146	54.436	NTVDVK(1)DHK	2	0.75796	1
	TRINITY_DN90687_c1_g2_m.24080	117	K	TRINITY_DN90687_c1_g2|g.24080 ORF TRINITY_DN90687_c1_g2|g.24080 TRINITY_DN90687_c1_g2_m.24080 type:5prime_partial len:131 (+) TRINITY_DN90687_c1_g2:3-395(+)	1	1.3339e-05	110.58	YTNSSFLK(1)DHISK	2	-1.3387	1
	TRINITY_DN90769_c0_g1_m.24141	80	K	TRINITY_DN90769_c0_g1|g.24141 ORF TRINITY_DN90769_c0_g1|g.24141 TRINITY_DN90769_c0_g1_m.24141 type:5prime_partial len:177 (+) TRINITY_DN90769_c0_g1:3-533(+)	1	0.000787427	65.408	YK(1)AFEPILLAGIER	2	-1.2838	1
	TRINITY_DN90773_c0_g1_m.24146	183	K	TRINITY_DN90773_c0_g1|g.24146 ORF TRINITY_DN90773_c0_g1|g.24146 TRINITY_DN90773_c0_g1_m.24146 type:complete len:250 (+) TRINITY_DN90773_c0_g1:150-899(+)	1	1.87231e-05	67.887	PGGLK(1)VETFDQLQNR	2	0.2971	1
	TRINITY_DN90947_c0_g1_m.24301	322	K	TRINITY_DN90947_c0_g1|g.24301 ORF TRINITY_DN90947_c0_g1|g.24301 TRINITY_DN90947_c0_g1_m.24301 type:complete len:500 (+) TRINITY_DN90947_c0_g1:92-1591(+)	1	0.0120651	73.891	DIKPANLVVTK(1)K	2	-0.82017	1
	TRINITY_DN90960_c0_g1_m.24318	660	K	TRINITY_DN90960_c0_g1|g.24318 ORF TRINITY_DN90960_c0_g1|g.24318 TRINITY_DN90960_c0_g1_m.24318 type:5prime_partial len:1229 (+) TRINITY_DN90960_c0_g1:1-3687(+)	1	0.0242331	63.301	LK(1)ATVDR	2	-1.616	1
	TRINITY_DN90967_c0_g1_m.24323	123	K	TRINITY_DN90967_c0_g1|g.24323 ORF TRINITY_DN90967_c0_g1|g.24323 TRINITY_DN90967_c0_g1_m.24323 type:complete len:208 (+) TRINITY_DN90967_c0_g1:149-772(+)	1	8.50749e-13	146.58	GGESIYGAK(1)FADENFK	2	-1.8822	2
	TRINITY_DN90967_c0_g1_m.24323	130	K	TRINITY_DN90967_c0_g1|g.24323 ORF TRINITY_DN90967_c0_g1|g.24323 TRINITY_DN90967_c0_g1_m.24323 type:complete len:208 (+) TRINITY_DN90967_c0_g1:149-772(+)	1	0.00208205	76.605	FADENFK(1)IK	2	-0.71481	1
	TRINITY_DN90967_c0_g1_m.24323	90	K	TRINITY_DN90967_c0_g1|g.24323 ORF TRINITY_DN90967_c0_g1|g.24323 TRINITY_DN90967_c0_g1_m.24323 type:complete len:208 (+) TRINITY_DN90967_c0_g1:149-772(+)	1	0.00107466	90.263	PLHFK(1)GSSFHR	3	0.41089	2
	TRINITY_DN90967_c0_g1_m.24323	39	K	TRINITY_DN90967_c0_g1|g.24323 ORF TRINITY_DN90967_c0_g1|g.24323 TRINITY_DN90967_c0_g1_m.24323 type:complete len:208 (+) TRINITY_DN90967_c0_g1:149-772(+)	1	1.82774e-09	146.48	EVTHK(1)VFFDVEIDGKPAGR	3	1.5322	1
	TRINITY_DN90967_c0_g1_m.24323	78	K	TRINITY_DN90967_c0_g1|g.24323 ORF TRINITY_DN90967_c0_g1|g.24323 TRINITY_DN90967_c0_g1_m.24323 type:complete len:208 (+) TRINITY_DN90967_c0_g1:149-772(+)	1	0.0307264	40.386	ALCTGEK(1)GVGK	2	-2.0464	1
	TRINITY_DN90967_c0_g1_m.24323	172	K	TRINITY_DN90967_c0_g1|g.24323 ORF TRINITY_DN90967_c0_g1|g.24323 TRINITY_DN90967_c0_g1_m.24323 type:complete len:208 (+) TRINITY_DN90967_c0_g1:149-772(+)	1	4.97204e-19	162.52	HVVFGK(1)VLSGMDVVYK	2	0.16415	2
	TRINITY_DN90967_c0_g1_m.24323	34	K	TRINITY_DN90967_c0_g1|g.24323 ORF TRINITY_DN90967_c0_g1|g.24323 TRINITY_DN90967_c0_g1_m.24323 type:complete len:208 (+) TRINITY_DN90967_c0_g1:149-772(+)	1	0.00352398	74.486	DLK(1)EVTHK	2	0.040747	1
	TRINITY_DN90967_c0_g1_m.24323	132	K	TRINITY_DN90967_c0_g1|g.24323 ORF TRINITY_DN90967_c0_g1|g.24323 TRINITY_DN90967_c0_g1_m.24323 type:complete len:208 (+) TRINITY_DN90967_c0_g1:149-772(+)	1	0.000105607	110.58	IK(1)HTGPGLLSMANAGR	3	-1.0536	3
	TRINITY_DN91011_c0_g1_m.24349	240	K	TRINITY_DN91011_c0_g1|g.24349 ORF TRINITY_DN91011_c0_g1|g.24349 TRINITY_DN91011_c0_g1_m.24349 type:complete len:419 (+) TRINITY_DN91011_c0_g1:279-1535(+)	1	0.00357111	58.476	NSGLPWTSPK(1)K	2	0.34014	2
	TRINITY_DN91011_c0_g1_m.24349	304	K	TRINITY_DN91011_c0_g1|g.24349 ORF TRINITY_DN91011_c0_g1|g.24349 TRINITY_DN91011_c0_g1_m.24349 type:complete len:419 (+) TRINITY_DN91011_c0_g1:279-1535(+)	1	0.010569	49.96	K(1)LLFAEDR	2	1.4727	1
	TRINITY_DN91011_c0_g1_m.24349	230	K	TRINITY_DN91011_c0_g1|g.24349 ORF TRINITY_DN91011_c0_g1|g.24349 TRINITY_DN91011_c0_g1_m.24349 type:complete len:419 (+) TRINITY_DN91011_c0_g1:279-1535(+)	1	1.4806e-07	126.48	GWK(1)NSGLPWTSPK	2	0.012261	1
	TRINITY_DN91011_c0_g1_m.24349	220	K	TRINITY_DN91011_c0_g1|g.24349 ORF TRINITY_DN91011_c0_g1|g.24349 TRINITY_DN91011_c0_g1_m.24349 type:complete len:419 (+) TRINITY_DN91011_c0_g1:279-1535(+)	1	0.00747848	43.306	AAFAIK(1)DGAEGTR	2	-1.2969	1
	TRINITY_DN91011_c0_g1_m.24349	184	K	TRINITY_DN91011_c0_g1|g.24349 ORF TRINITY_DN91011_c0_g1|g.24349 TRINITY_DN91011_c0_g1_m.24349 type:complete len:419 (+) TRINITY_DN91011_c0_g1:279-1535(+)	1	0.00601882	70.806	FK(1)DPGNTTLFIIDK	2	1.6989	1
	TRINITY_DN91011_c0_g1_m.24349	172	K	TRINITY_DN91011_c0_g1|g.24349 ORF TRINITY_DN91011_c0_g1|g.24349 TRINITY_DN91011_c0_g1_m.24349 type:complete len:419 (+) TRINITY_DN91011_c0_g1:279-1535(+)	1	0.00173624	63.397	GEDK(1)AGFLNK	2	-1.2213	1
	TRINITY_DN91011_c0_g1_m.24349	178	K	TRINITY_DN91011_c0_g1|g.24349 ORF TRINITY_DN91011_c0_g1|g.24349 TRINITY_DN91011_c0_g1_m.24349 type:complete len:419 (+) TRINITY_DN91011_c0_g1:279-1535(+)	1	0.00742392	74.486	AGFLNK(1)LALK	2	-0.49402	1
	TRINITY_DN91011_c0_g1_m.24349	340	K	TRINITY_DN91011_c0_g1|g.24349 ORF TRINITY_DN91011_c0_g1|g.24349 TRINITY_DN91011_c0_g1_m.24349 type:complete len:419 (+) TRINITY_DN91011_c0_g1:279-1535(+)	1	0.00286772	61.577	MIGK(1)ALLPTQSR	2	3.3585	1
	TRINITY_DN91011_c0_g1_m.24349	329	K	TRINITY_DN91011_c0_g1|g.24349 ORF TRINITY_DN91011_c0_g1|g.24349 TRINITY_DN91011_c0_g1_m.24349 type:complete len:419 (+) TRINITY_DN91011_c0_g1:279-1535(+)	1	0.00548078	40.533	VAPK(1)ELVDEIK	2	-1.8204	1
	TRINITY_DN91011_c0_g1_m.24349	148	K	TRINITY_DN91011_c0_g1|g.24349 ORF TRINITY_DN91011_c0_g1|g.24349 TRINITY_DN91011_c0_g1_m.24349 type:complete len:419 (+) TRINITY_DN91011_c0_g1:279-1535(+)	1	6.23808e-05	120.65	ELK(1)EAGSPDLR	2	0.79618	1
	TRINITY_DN91011_c0_g1_m.24349	325	K	TRINITY_DN91011_c0_g1|g.24349 ORF TRINITY_DN91011_c0_g1|g.24349 TRINITY_DN91011_c0_g1_m.24349 type:complete len:419 (+) TRINITY_DN91011_c0_g1:279-1535(+)	0.999999	0.00333747	61.23	KATLQQVDEFLNTK(1)VAPK	3	-1.2874	1
	TRINITY_DN91098_c0_g1_m.24420	22	K	TRINITY_DN91098_c0_g1|g.24420 ORF TRINITY_DN91098_c0_g1|g.24420 TRINITY_DN91098_c0_g1_m.24420 type:complete len:163 (+) TRINITY_DN91098_c0_g1:931-1419(+)	1	0.000209799	136.84	VDFK(1)EPVWFK	2	0.79526	1
	TRINITY_DN91143_c0_g1_m.24453	218	K	TRINITY_DN91143_c0_g1|g.24453 ORF TRINITY_DN91143_c0_g1|g.24453 TRINITY_DN91143_c0_g1_m.24453 type:complete len:255 (+) TRINITY_DN91143_c0_g1:31-795(+)	1	0.0246776	47.349	LINHTK(1)GK	1	-12.118	1
	TRINITY_DN91238_c0_g2_m.24530	40	K	TRINITY_DN91238_c0_g2|g.24530 ORF TRINITY_DN91238_c0_g2|g.24530 TRINITY_DN91238_c0_g2_m.24530 type:complete len:276 (+) TRINITY_DN91238_c0_g2:157-984(+)	1	0.00121699	83.358	HTK(1)AIVSK	2	-0.11011	1
	TRINITY_DN91238_c0_g2_m.24530	58	K	TRINITY_DN91238_c0_g2|g.24530 ORF TRINITY_DN91238_c0_g2|g.24530 TRINITY_DN91238_c0_g2_m.24530 type:complete len:276 (+) TRINITY_DN91238_c0_g2:157-984(+)	1	0.0120998	67.903	SSFDK(1)ANR	2	1.5859	1
	TRINITY_DN91288_c0_g1_m.24589	49	K	TRINITY_DN91288_c0_g1|g.24589 ORF TRINITY_DN91288_c0_g1|g.24589 TRINITY_DN91288_c0_g1_m.24589 type:complete len:117 (+) TRINITY_DN91288_c0_g1:101-451(+)	1	2.83304e-10	141.44	GK(1)DITELIASGR	2	-0.046766	1
	TRINITY_DN91288_c0_g1_m.24589	47	K	TRINITY_DN91288_c0_g1|g.24589 ORF TRINITY_DN91288_c0_g1|g.24589 TRINITY_DN91288_c0_g1_m.24589 type:complete len:117 (+) TRINITY_DN91288_c0_g1:101-451(+)	1	0.00141109	81.099	IEFLLSEVK(1)GK	2	1.0818	1
	TRINITY_DN91312_c0_g1_m.24613	217	K	TRINITY_DN91312_c0_g1|g.24613 ORF TRINITY_DN91312_c0_g1|g.24613 TRINITY_DN91312_c0_g1_m.24613 type:complete len:247 (+) TRINITY_DN91312_c0_g1:244-984(+)	1	0.00467003	90.306	EVEDKVEDVK(1)K	2	-0.49178	1
	TRINITY_DN91312_c0_g1_m.24613	96	K	TRINITY_DN91312_c0_g1|g.24613 ORF TRINITY_DN91312_c0_g1|g.24613 TRINITY_DN91312_c0_g1_m.24613 type:complete len:247 (+) TRINITY_DN91312_c0_g1:244-984(+)	1	8.76769e-05	100.07	LK(1)QLSVLALAENNK	2	-1.2729	1
	TRINITY_DN91375_c0_g1_m.24685	54	K	TRINITY_DN91375_c0_g1|g.24685 ORF TRINITY_DN91375_c0_g1|g.24685 TRINITY_DN91375_c0_g1_m.24685 type:complete len:130 (+) TRINITY_DN91375_c0_g1:120-509(+)	1	2.69406e-06	114.35	VASLGGK(1)AGTLGDVVSVSR	2	-1.2647	2
	TRINITY_DN91480_c0_g1_m.24763	402	K	TRINITY_DN91480_c0_g1|g.24763 ORF TRINITY_DN91480_c0_g1|g.24763 TRINITY_DN91480_c0_g1_m.24763 type:complete len:726 (+) TRINITY_DN91480_c0_g1:112-2289(+)	1	0.000635779	81.335	LK(1)QSIFNDIEK	2	-0.14793	1
	TRINITY_DN91480_c0_g1_m.24763	39	K	TRINITY_DN91480_c0_g1|g.24763 ORF TRINITY_DN91480_c0_g1|g.24763 TRINITY_DN91480_c0_g1_m.24763 type:complete len:726 (+) TRINITY_DN91480_c0_g1:112-2289(+)	1	0.0122518	50.834	EK(1)YAEAMSR	2	1.9007	1
	TRINITY_DN91514_c0_g1_m.24796	370	K	TRINITY_DN91514_c0_g1|g.24796 ORF TRINITY_DN91514_c0_g1|g.24796 TRINITY_DN91514_c0_g1_m.24796 type:complete len:490 (+) TRINITY_DN91514_c0_g1:345-1814(+)	1	0.0172703	51.43	GAQK(1)LAQIR	2	-0.21775	1
	TRINITY_DN91566_c1_g3_m.24846	213	K	TRINITY_DN91566_c1_g3|g.24846 ORF TRINITY_DN91566_c1_g3|g.24846 TRINITY_DN91566_c1_g3_m.24846 type:complete len:436 (+) TRINITY_DN91566_c1_g3:137-1444(+)	1	3.68975e-06	110.91	VLSASPSAYSASPK(1)TK	2	-4.8488	1
	TRINITY_DN91569_c0_g1_m.24849	75	K	TRINITY_DN91569_c0_g1|g.24849 ORF TRINITY_DN91569_c0_g1|g.24849 TRINITY_DN91569_c0_g1_m.24849 type:5prime_partial len:257 (+) TRINITY_DN91569_c0_g1:2-772(+)	1	1.99927e-12	144.51	VLLTLEEK(1)GIPYETK	2	0.951	1
	TRINITY_DN91569_c0_g1_m.24849	156	K	TRINITY_DN91569_c0_g1|g.24849 ORF TRINITY_DN91569_c0_g1|g.24849 TRINITY_DN91569_c0_g1_m.24849 type:5prime_partial len:257 (+) TRINITY_DN91569_c0_g1:2-772(+)	1	7.97925e-07	95.263	SK(1)DPNDGSEQALLNELR	2	-3.1176	1
	TRINITY_DN91569_c0_g1_m.24849	138	K	TRINITY_DN91569_c0_g1|g.24849 ORF TRINITY_DN91569_c0_g1|g.24849 TRINITY_DN91569_c0_g1_m.24849 type:5prime_partial len:257 (+) TRINITY_DN91569_c0_g1:2-772(+)	1	0.000400014	69.201	YPSPSFATPPEK(1)ASVGSK	2	-4.3111	1
	TRINITY_DN91569_c0_g1_m.24849	253	K	TRINITY_DN91569_c0_g1|g.24849 ORF TRINITY_DN91569_c0_g1|g.24849 TRINITY_DN91569_c0_g1_m.24849 type:5prime_partial len:257 (+) TRINITY_DN91569_c0_g1:2-772(+)	0.999999	0.00724862	59.625	TKPAADDYVIAGWAPK(1)VNS	2	-0.36412	1
	TRINITY_DN91569_c0_g1_m.24849	154	K	TRINITY_DN91569_c0_g1|g.24849 ORF TRINITY_DN91569_c0_g1|g.24849 TRINITY_DN91569_c0_g1_m.24849 type:5prime_partial len:257 (+) TRINITY_DN91569_c0_g1:2-772(+)	1	0.000896033	67.548	IFSSFVTFLK(1)SK	2	1.6423	1
	TRINITY_DN91569_c0_g1_m.24849	106	K	TRINITY_DN91569_c0_g1|g.24849 ORF TRINITY_DN91569_c0_g1|g.24849 TRINITY_DN91569_c0_g1_m.24849 type:5prime_partial len:257 (+) TRINITY_DN91569_c0_g1:2-772(+)	1	5.05473e-09	140.05	VPVLK(1)IEEDR	2	2.9806	1
	TRINITY_DN91569_c0_g1_m.24849	101	K	TRINITY_DN91569_c0_g1|g.24849 ORF TRINITY_DN91569_c0_g1|g.24849 TRINITY_DN91569_c0_g1_m.24849 type:5prime_partial len:257 (+) TRINITY_DN91569_c0_g1:2-772(+)	1	0.0403517	53.517	ISPEGK(1)VPVLK	2	-0.38537	1
	TRINITY_DN91569_c0_g1_m.24849	89	K	TRINITY_DN91569_c0_g1|g.24849 ORF TRINITY_DN91569_c0_g1|g.24849 TRINITY_DN91569_c0_g1_m.24849 type:5prime_partial len:257 (+) TRINITY_DN91569_c0_g1:2-772(+)	1	0.000985478	66.953	LVDLSNK(1)PDWFLK	2	0.74431	1
	TRINITY_DN91647_c1_g1_m.24911	92	K	TRINITY_DN91647_c1_g1|g.24911 ORF TRINITY_DN91647_c1_g1|g.24911 TRINITY_DN91647_c1_g1_m.24911 type:complete len:239 (+) TRINITY_DN91647_c1_g1:166-882(+)	1	3.22914e-17	190.37	GETSK(1)VVHLQSAIK	2	-0.95408	1
	TRINITY_DN91647_c1_g1_m.24911	87	K	TRINITY_DN91647_c1_g1|g.24911 ORF TRINITY_DN91647_c1_g1|g.24911 TRINITY_DN91647_c1_g1_m.24911 type:complete len:239 (+) TRINITY_DN91647_c1_g1:166-882(+)	1	6.08644e-06	104	ALEQLDEAVNK(1)GETSK	2	-2.7708	1
	TRINITY_DN91647_c1_g1_m.24911	76	K	TRINITY_DN91647_c1_g1|g.24911 ORF TRINITY_DN91647_c1_g1|g.24911 TRINITY_DN91647_c1_g1_m.24911 type:complete len:239 (+) TRINITY_DN91647_c1_g1:166-882(+)	1	2.96677e-65	241.3	HHQTYITNYNK(1)ALEQLDEAVNK	3	3.562	1
	TRINITY_DN91672_c0_g2_m.24937	38	K	TRINITY_DN91672_c0_g2|g.24937 ORF TRINITY_DN91672_c0_g2|g.24937 TRINITY_DN91672_c0_g2_m.24937 type:complete len:496 (+) TRINITY_DN91672_c0_g2:281-1768(+)	1	0.00812577	50.297	WVDAYDGK(1)TIK	2	2.8473	1
	TRINITY_DN91672_c0_g2_m.24937	371	K	TRINITY_DN91672_c0_g2|g.24937 ORF TRINITY_DN91672_c0_g2|g.24937 TRINITY_DN91672_c0_g2_m.24937 type:complete len:496 (+) TRINITY_DN91672_c0_g2:281-1768(+)	1	0.002049	94.806	GANIVLGGK(1)R	2	-1.7577	1
	TRINITY_DN91672_c0_g2_m.24937	22	K	TRINITY_DN91672_c0_g2|g.24937 ORF TRINITY_DN91672_c0_g2|g.24937 TRINITY_DN91672_c0_g2_m.24937 type:complete len:496 (+) TRINITY_DN91672_c0_g2:281-1768(+)	1	0.00199273	79.889	ESGLLK(1)TQGLIGGK	2	-0.57699	1
	TRINITY_DN91672_c0_g2_m.24937	262	K	TRINITY_DN91672_c0_g2|g.24937 ORF TRINITY_DN91672_c0_g2|g.24937 TRINITY_DN91672_c0_g2_m.24937 type:complete len:496 (+) TRINITY_DN91672_c0_g2:281-1768(+)	1	0.00131208	72.365	LMAGSANTVK(1)K	2	-0.48699	1
	TRINITY_DN91672_c0_g2_m.24937	410	K	TRINITY_DN91672_c0_g2|g.24937 ORF TRINITY_DN91672_c0_g2|g.24937 TRINITY_DN91672_c0_g2_m.24937 type:complete len:496 (+) TRINITY_DN91672_c0_g2:281-1768(+)	1	0.00199352	86.205	FK(1)TEDEAIR	2	-0.8957	1
	TRINITY_DN91797_c0_g1_m.25035	90	K	TRINITY_DN91797_c0_g1|g.25035 ORF TRINITY_DN91797_c0_g1|g.25035 TRINITY_DN91797_c0_g1_m.25035 type:5prime_partial len:312 (+) TRINITY_DN91797_c0_g1:1-936(+)	1	0.00148298	75.474	LSAVK(1)AVEYVK	2	-1.7042	1
	TRINITY_DN91797_c0_g1_m.25035	142	K	TRINITY_DN91797_c0_g1|g.25035 ORF TRINITY_DN91797_c0_g1|g.25035 TRINITY_DN91797_c0_g1_m.25035 type:5prime_partial len:312 (+) TRINITY_DN91797_c0_g1:1-936(+)	1	2.26436e-10	149.14	TFEQAK(1)SLGIPLSTLDEHPR	3	-0.38365	1
	TRINITY_DN91797_c0_g1_m.25035	185	K	TRINITY_DN91797_c0_g1|g.25035 ORF TRINITY_DN91797_c0_g1|g.25035 TRINITY_DN91797_c0_g1_m.25035 type:5prime_partial len:312 (+) TRINITY_DN91797_c0_g1:1-936(+)	1	6.38469e-09	148.9	EK(1)MVEAASDK	2	0.30826	1
	TRINITY_DN91797_c0_g1_m.25035	135	K	TRINITY_DN91797_c0_g1|g.25035 ORF TRINITY_DN91797_c0_g1|g.25035 TRINITY_DN91797_c0_g1_m.25035 type:5prime_partial len:312 (+) TRINITY_DN91797_c0_g1:1-936(+)	1	0.00158839	70.389	LSDIIGVPTSK(1)R	2	1.8494	1
	TRINITY_DN91797_c0_g1_m.25035	242	K	TRINITY_DN91797_c0_g1|g.25035 ORF TRINITY_DN91797_c0_g1|g.25035 TRINITY_DN91797_c0_g1_m.25035 type:5prime_partial len:312 (+) TRINITY_DN91797_c0_g1:1-936(+)	1	0.0158692	56.378	EEGCEAK(1)LR	2	1.8339	1
	TRINITY_DN91806_c0_g1_m.25040	182	K	TRINITY_DN91806_c0_g1|g.25040 ORF TRINITY_DN91806_c0_g1|g.25040 TRINITY_DN91806_c0_g1_m.25040 type:complete len:251 (+) TRINITY_DN91806_c0_g1:20-772(+)	1	2.61221e-05	91.939	IGAAEAAAK(1)GIIDR	2	1.0686	1
	TRINITY_DN91888_c0_g1_m.25118	308	K	TRINITY_DN91888_c0_g1|g.25118 ORF TRINITY_DN91888_c0_g1|g.25118 TRINITY_DN91888_c0_g1_m.25118 type:5prime_partial len:353 (+) TRINITY_DN91888_c0_g1:1-1059(+)	1	0.0286058	51.864	LK(1)SVTVQR	2	-0.064755	1
	TRINITY_DN91916_c0_g1_m.25148	196	K	TRINITY_DN91916_c0_g1|g.25148 ORF TRINITY_DN91916_c0_g1|g.25148 TRINITY_DN91916_c0_g1_m.25148 type:3prime_partial len:408 (+) TRINITY_DN91916_c0_g1:182-1402(+)	1	0.00619093	68.108	NPVFLEWEVNEQVK(1)R	2	1.3634	1
	TRINITY_DN91916_c0_g1_m.25148	129	K	TRINITY_DN91916_c0_g1|g.25148 ORF TRINITY_DN91916_c0_g1|g.25148 TRINITY_DN91916_c0_g1_m.25148 type:3prime_partial len:408 (+) TRINITY_DN91916_c0_g1:182-1402(+)	1	0.0237989	56.378	LAFK(1)STTNR	2	-1.0266	1
	TRINITY_DN91989_c0_g1_m.25210	180	K	TRINITY_DN91989_c0_g1|g.25210 ORF TRINITY_DN91989_c0_g1|g.25210 TRINITY_DN91989_c0_g1_m.25210 type:5prime_partial len:235 (+) TRINITY_DN91989_c0_g1:2-706(+)	1	0.00621229	81.32	EK(1)SLLGR	2	-1.9712	1
	TRINITY_DN91989_c0_g1_m.25210	228	K	TRINITY_DN91989_c0_g1|g.25210 ORF TRINITY_DN91989_c0_g1|g.25210 TRINITY_DN91989_c0_g1_m.25210 type:5prime_partial len:235 (+) TRINITY_DN91989_c0_g1:2-706(+)	1	5.79585e-17	128.97	ILEEVDTAEK(1)ALLR	2	3.2898	1
	TRINITY_DN91989_c0_g1_m.25210	144	K	TRINITY_DN91989_c0_g1|g.25210 ORF TRINITY_DN91989_c0_g1|g.25210 TRINITY_DN91989_c0_g1_m.25210 type:5prime_partial len:235 (+) TRINITY_DN91989_c0_g1:2-706(+)	1	7.38563e-25	223.93	ETAEVINK(1)VR	2	0.34794	1
	TRINITY_DN92006_c0_g1_m.25220	190	K	TRINITY_DN92006_c0_g1|g.25220 ORF TRINITY_DN92006_c0_g1|g.25220 TRINITY_DN92006_c0_g1_m.25220 type:complete len:346 (+) TRINITY_DN92006_c0_g1:120-1157(+)	1	4.39409e-12	130.71	VAVLTQGEK(1)VDEAK	2	-2.0144	1
	TRINITY_DN92006_c0_g1_m.25220	120	K	TRINITY_DN92006_c0_g1|g.25220 ORF TRINITY_DN92006_c0_g1|g.25220 TRINITY_DN92006_c0_g1_m.25220 type:complete len:346 (+) TRINITY_DN92006_c0_g1:120-1157(+)	1	0.0102832	78.178	FLEIQK(1)LR	2	-1.1143	1
	TRINITY_DN92006_c0_g1_m.25220	174	K	TRINITY_DN92006_c0_g1|g.25220 ORF TRINITY_DN92006_c0_g1|g.25220 TRINITY_DN92006_c0_g1_m.25220 type:complete len:346 (+) TRINITY_DN92006_c0_g1:120-1157(+)	1	0.00193059	70.806	ATVNLPK(1)GTGQTVR	2	-1.4409	1
	TRINITY_DN92006_c0_g1_m.25220	230	K	TRINITY_DN92006_c0_g1|g.25220 ORF TRINITY_DN92006_c0_g1|g.25220 TRINITY_DN92006_c0_g1_m.25220 type:complete len:346 (+) TRINITY_DN92006_c0_g1:120-1157(+)	1	0.000390635	65.173	LIASPDMMPK(1)VASLGK	2	1.9593	1
	TRINITY_DN92007_c0_g1_m.25222	205	K	TRINITY_DN92007_c0_g1|g.25222 ORF TRINITY_DN92007_c0_g1|g.25222 TRINITY_DN92007_c0_g1_m.25222 type:complete len:824 (+) TRINITY_DN92007_c0_g1:129-2600(+)	1	0.0191567	54.436	EK(1)SMAFER	2	0.65406	1
	TRINITY_DN92007_c0_g1_m.25222	145	K	TRINITY_DN92007_c0_g1|g.25222 ORF TRINITY_DN92007_c0_g1|g.25222 TRINITY_DN92007_c0_g1_m.25222 type:complete len:824 (+) TRINITY_DN92007_c0_g1:129-2600(+)	1	0.000150325	81.48	LVLHK(1)AGEFFHSAR	2	-3.5649	2
	TRINITY_DN92007_c0_g1_m.25222	140	K	TRINITY_DN92007_c0_g1|g.25222 ORF TRINITY_DN92007_c0_g1|g.25222 TRINITY_DN92007_c0_g1_m.25222 type:complete len:824 (+) TRINITY_DN92007_c0_g1:129-2600(+)	1	2.55036e-12	147.72	TYNELLEYK(1)LVLHK	2	-1.3197	1
	TRINITY_DN92033_c0_g1_m.25241	335	K	TRINITY_DN92033_c0_g1|g.25241 ORF TRINITY_DN92033_c0_g1|g.25241 TRINITY_DN92033_c0_g1_m.25241 type:complete len:780 (+) TRINITY_DN92033_c0_g1:93-2432(+)	1	0.0158692	56.378	NMQTK(1)TGAR	2	0.43377	1
	TRINITY_DN92044_c0_g1_m.25258	187	K	TRINITY_DN92044_c0_g1|g.25258 ORF TRINITY_DN92044_c0_g1|g.25258 TRINITY_DN92044_c0_g1_m.25258 type:complete len:280 (+) TRINITY_DN92044_c0_g1:184-1023(+)	1	9.6519e-05	67.881	SVAGELGK(1)HGIR	2	-1.5513	1
	TRINITY_DN92074_c0_g2_m.25288	162	K	TRINITY_DN92074_c0_g2|g.25288 ORF TRINITY_DN92074_c0_g2|g.25288 TRINITY_DN92074_c0_g2_m.25288 type:complete len:586 (+) TRINITY_DN92074_c0_g2:382-2139(+)	1	0.000896033	83.775	HPSGK(1)LVDSEIK	2	-1.4581	1
	TRINITY_DN92074_c0_g2_m.25288	529	K	TRINITY_DN92074_c0_g2|g.25288 ORF TRINITY_DN92074_c0_g2|g.25288 TRINITY_DN92074_c0_g2_m.25288 type:complete len:586 (+) TRINITY_DN92074_c0_g2:382-2139(+)	1	0.0169723	52.591	VEELVAK(1)EK	2	0.33814	1
	TRINITY_DN92074_c0_g2_m.25288	497	K	TRINITY_DN92074_c0_g2|g.25288 ORF TRINITY_DN92074_c0_g2|g.25288 TRINITY_DN92074_c0_g2_m.25288 type:complete len:586 (+) TRINITY_DN92074_c0_g2:382-2139(+)	1	0.0166975	41.824	IADGLLK(1)ELSK	2	-3.4893	1
	TRINITY_DN92074_c0_g2_m.25288	23	K	TRINITY_DN92074_c0_g2|g.25288 ORF TRINITY_DN92074_c0_g2|g.25288 TRINITY_DN92074_c0_g2_m.25288 type:complete len:586 (+) TRINITY_DN92074_c0_g2:382-2139(+)	1	0.0201618	54.584	VLSTLK(1)VENAGR	2	-3.1374	1
	TRINITY_DN92121_c0_g1_m.25335	69	K	TRINITY_DN92121_c0_g1|g.25335 ORF TRINITY_DN92121_c0_g1|g.25335 TRINITY_DN92121_c0_g1_m.25335 type:complete len:527 (+) TRINITY_DN92121_c0_g1:51-1631(+)	1	0.00311276	85.813	LLSLIYPK(1)R	2	-4.6663	2
	TRINITY_DN92219_c0_g1_m.25433	337	K	TRINITY_DN92219_c0_g1|g.25433 ORF TRINITY_DN92219_c0_g1|g.25433 TRINITY_DN92219_c0_g1_m.25433 type:complete len:556 (+) TRINITY_DN92219_c0_g1:336-2003(+)	1	1.82244e-08	135.21	YK(1)TEEYSHTAVNK	2	-1.2992	1
	TRINITY_DN92233_c0_g1_m.25449	131	K	TRINITY_DN92233_c0_g1|g.25449 ORF TRINITY_DN92233_c0_g1|g.25449 TRINITY_DN92233_c0_g1_m.25449 type:complete len:552 (+) TRINITY_DN92233_c0_g1:32-1687(+)	1	1.33643e-11	71.471	GASAK(1)GFFECTHDVTNLTCADFLR	3	2	1
	TRINITY_DN92233_c0_g1_m.25449	286	K	TRINITY_DN92233_c0_g1|g.25449 ORF TRINITY_DN92233_c0_g1|g.25449 TRINITY_DN92233_c0_g1_m.25449 type:complete len:552 (+) TRINITY_DN92233_c0_g1:32-1687(+)	1	0.0149687	59.645	FHWK(1)PTCGVR	2	0.13043	1
	TRINITY_DN92233_c0_g1_m.25449	488	K	TRINITY_DN92233_c0_g1|g.25449 ORF TRINITY_DN92233_c0_g1|g.25449 TRINITY_DN92233_c0_g1_m.25449 type:complete len:552 (+) TRINITY_DN92233_c0_g1:32-1687(+)	1	2.21848e-18	225.68	QNDFK(1)QPGER	2	-0.41405	1
	TRINITY_DN92233_c0_g1_m.25449	517	K	TRINITY_DN92233_c0_g1|g.25449 ORF TRINITY_DN92233_c0_g1|g.25449 TRINITY_DN92233_c0_g1_m.25449 type:complete len:552 (+) TRINITY_DN92233_c0_g1:32-1687(+)	1	1.75838e-12	132.93	WVEALGHPK(1)VSYELR	2	-1.6405	2
	TRINITY_DN92233_c0_g1_m.25449	282	K	TRINITY_DN92233_c0_g1|g.25449 ORF TRINITY_DN92233_c0_g1|g.25449 TRINITY_DN92233_c0_g1_m.25449 type:complete len:552 (+) TRINITY_DN92233_c0_g1:32-1687(+)	0.999201	0.00526228	53.363	SQYVK(0.999)FHWK(0.001)PTCGVR	3	0.22778	1
	TRINITY_DN92233_c0_g1_m.25449	475	K	TRINITY_DN92233_c0_g1|g.25449 ORF TRINITY_DN92233_c0_g1|g.25449 TRINITY_DN92233_c0_g1_m.25449 type:complete len:552 (+) TRINITY_DN92233_c0_g1:32-1687(+)	1	0.0127475	48.785	VPIPSRPLTGK(1)R	3	-0.046581	1
	TRINITY_DN92233_c0_g1_m.25449	218	K	TRINITY_DN92233_c0_g1|g.25449 ORF TRINITY_DN92233_c0_g1|g.25449 TRINITY_DN92233_c0_g1_m.25449 type:complete len:552 (+) TRINITY_DN92233_c0_g1:32-1687(+)	1	8.7859e-08	125.17	FPDVIHAFK(1)PNPR	2	-2.8551	2
	TRINITY_DN92233_c0_g1_m.25449	109	K	TRINITY_DN92233_c0_g1|g.25449 ORF TRINITY_DN92233_c0_g1|g.25449 TRINITY_DN92233_c0_g1_m.25449 type:complete len:552 (+) TRINITY_DN92233_c0_g1:32-1687(+)	1	2.38857e-15	164.56	GPILLEDYHLIEK(1)IAHFAR	3	2.2259	1
	TRINITY_DN92233_c0_g1_m.25449	209	K	TRINITY_DN92233_c0_g1|g.25449 ORF TRINITY_DN92233_c0_g1|g.25449 TRINITY_DN92233_c0_g1_m.25449 type:complete len:552 (+) TRINITY_DN92233_c0_g1:32-1687(+)	0.999987	0.00318279	50.314	DGIK(1)FPDVIHAFKPNPR	3	-2.2189	1
	TRINITY_DN92233_c0_g1_m.25449	483	K	TRINITY_DN92233_c0_g1|g.25449 ORF TRINITY_DN92233_c0_g1|g.25449 TRINITY_DN92233_c0_g1_m.25449 type:complete len:552 (+) TRINITY_DN92233_c0_g1:32-1687(+)	1	5.4536e-06	123.5	IIIQK(1)QNDFK	2	1.7335	1
	TRINITY_DN92233_c0_g1_m.25449	532	K	TRINITY_DN92233_c0_g1|g.25449 ORF TRINITY_DN92233_c0_g1|g.25449 TRINITY_DN92233_c0_g1_m.25449 type:complete len:552 (+) TRINITY_DN92233_c0_g1:32-1687(+)	1	3.34508e-06	86.135	SIWVNYLAK(1)CDTTLGQK	2	3.5792	1
	TRINITY_DN92233_c0_g1_m.25449	478	K	TRINITY_DN92233_c0_g1|g.25449 ORF TRINITY_DN92233_c0_g1|g.25449 TRINITY_DN92233_c0_g1_m.25449 type:complete len:552 (+) TRINITY_DN92233_c0_g1:32-1687(+)	1	0.000781105	108.92	EK(1)IIIQK	2	-0.97436	1
	TRINITY_DN92256_c0_g1_m.25468	197	K	TRINITY_DN92256_c0_g1|g.25468 ORF TRINITY_DN92256_c0_g1|g.25468 TRINITY_DN92256_c0_g1_m.25468 type:complete len:366 (+) TRINITY_DN92256_c0_g1:261-1358(+)	0.971327	1.16719e-08	79.182	GVCSNFLCDLK(0.029)PGDEVK(0.971)LTGPVGK	3	-0.56018	1
	TRINITY_DN92256_c0_g1_m.25468	204	K	TRINITY_DN92256_c0_g1|g.25468 ORF TRINITY_DN92256_c0_g1|g.25468 TRINITY_DN92256_c0_g1_m.25468 type:complete len:366 (+) TRINITY_DN92256_c0_g1:261-1358(+)	1	0.0108948	74.524	LTGPVGK(1)EMLMPK	2	-0.38039	2
	TRINITY_DN92256_c0_g1_m.25468	330	K	TRINITY_DN92256_c0_g1|g.25468 ORF TRINITY_DN92256_c0_g1|g.25468 TRINITY_DN92256_c0_g1_m.25468 type:complete len:366 (+) TRINITY_DN92256_c0_g1:261-1358(+)	1	0.00090643	66.509	GMEK(1)GIDDIMTDLAAK	2	2.7738	2
	TRINITY_DN92256_c0_g1_m.25468	234	K	TRINITY_DN92256_c0_g1|g.25468 ORF TRINITY_DN92256_c0_g1|g.25468 TRINITY_DN92256_c0_g1_m.25468 type:complete len:366 (+) TRINITY_DN92256_c0_g1:261-1358(+)	1	0.000326471	61.48	GFLWK(1)MFFEK	2	1.1949	1
	TRINITY_DN92256_c0_g1_m.25468	326	K	TRINITY_DN92256_c0_g1|g.25468 ORF TRINITY_DN92256_c0_g1|g.25468 TRINITY_DN92256_c0_g1_m.25468 type:complete len:366 (+) TRINITY_DN92256_c0_g1:261-1358(+)	1	0.0211222	59.77	NDNTFVYMCGLK(1)GMEK	2	-1.4029	1
	TRINITY_DN92256_c0_g1_m.25468	239	K	TRINITY_DN92256_c0_g1|g.25468 ORF TRINITY_DN92256_c0_g1|g.25468 TRINITY_DN92256_c0_g1_m.25468 type:complete len:366 (+) TRINITY_DN92256_c0_g1:261-1358(+)	1	5.89798e-18	183	MFFEK(1)HENYK	2	-1.7002	2
	TRINITY_DN92256_c0_g1_m.25468	273	K	TRINITY_DN92256_c0_g1|g.25468 ORF TRINITY_DN92256_c0_g1|g.25468 TRINITY_DN92256_c0_g1_m.25468 type:complete len:366 (+) TRINITY_DN92256_c0_g1:261-1358(+)	1	0.00292592	98.009	EK(1)APDNFR	2	0.028409	1
	TRINITY_DN92256_c0_g1_m.25468	295	K	TRINITY_DN92256_c0_g1|g.25468 ORF TRINITY_DN92256_c0_g1|g.25468 TRINITY_DN92256_c0_g1_m.25468 type:complete len:366 (+) TRINITY_DN92256_c0_g1:261-1358(+)	1	0.000396939	72.042	GEK(1)MYIQTR	2	-0.73706	3
	TRINITY_DN92256_c0_g1_m.25468	167	K	TRINITY_DN92256_c0_g1|g.25468 ORF TRINITY_DN92256_c0_g1|g.25468 TRINITY_DN92256_c0_g1_m.25468 type:complete len:366 (+) TRINITY_DN92256_c0_g1:261-1358(+)	1	0.0150948	67.903	TVSLCVK(1)R	2	-0.63454	1
	TRINITY_DN92256_c0_g1_m.25468	269	K	TRINITY_DN92256_c0_g1|g.25468 ORF TRINITY_DN92256_c0_g1|g.25468 TRINITY_DN92256_c0_g1_m.25468 type:complete len:366 (+) TRINITY_DN92256_c0_g1:261-1358(+)	1	0.0108286	46.835	EEFEK(1)MK	2	0.79773	1
	TRINITY_DN92256_c0_g1_m.25468	72	K	TRINITY_DN92256_c0_g1|g.25468 ORF TRINITY_DN92256_c0_g1|g.25468 TRINITY_DN92256_c0_g1_m.25468 type:complete len:366 (+) TRINITY_DN92256_c0_g1:261-1358(+)	0.998665	3.38522e-11	166.71	VSK(0.999)K(0.001)DEEGVITNK	3	0.5056	2
	TRINITY_DN92256_c0_g1_m.25468	86	K	TRINITY_DN92256_c0_g1|g.25468 ORF TRINITY_DN92256_c0_g1|g.25468 TRINITY_DN92256_c0_g1_m.25468 type:complete len:366 (+) TRINITY_DN92256_c0_g1:261-1358(+)	0.999997	0.00882506	88.181	FKPK(1)TPYTGR	2	-0.83017	1
	TRINITY_DN92256_c0_g1_m.25468	82	K	TRINITY_DN92256_c0_g1|g.25468 ORF TRINITY_DN92256_c0_g1|g.25468 TRINITY_DN92256_c0_g1_m.25468 type:complete len:366 (+) TRINITY_DN92256_c0_g1:261-1358(+)	1	5.41595e-08	142.08	KDEEGVITNK(1)FK	2	-1.9462	3
	TRINITY_DN92293_c0_g2_m.25503	171	K	TRINITY_DN92293_c0_g2|g.25503 ORF TRINITY_DN92293_c0_g2|g.25503 TRINITY_DN92293_c0_g2_m.25503 type:complete len:182 (+) TRINITY_DN92293_c0_g2:267-812(+)	1	0.0170362	44.57	VK(1)SIYGDVIGSG	2	-1.4752	1
	TRINITY_DN92294_c0_g1_m.25504	177	K	TRINITY_DN92294_c0_g1|g.25504 ORF TRINITY_DN92294_c0_g1|g.25504 TRINITY_DN92294_c0_g1_m.25504 type:complete len:219 (+) TRINITY_DN92294_c0_g1:52-708(+)	1	0.00158074	65.404	ALLK(1)MSENHR	2	-1.3197	1
	TRINITY_DN92358_c0_g1_m.25565	87	K	TRINITY_DN92358_c0_g1|g.25565 ORF TRINITY_DN92358_c0_g1|g.25565 TRINITY_DN92358_c0_g1_m.25565 type:complete len:368 (+) TRINITY_DN92358_c0_g1:104-1207(+)	1	0.00544769	50.09	ASCISFK(1)DSACR	2	-2.211	1
	TRINITY_DN92358_c0_g1_m.25565	80	K	TRINITY_DN92358_c0_g1|g.25565 ORF TRINITY_DN92358_c0_g1|g.25565 TRINITY_DN92358_c0_g1_m.25565 type:complete len:368 (+) TRINITY_DN92358_c0_g1:104-1207(+)	1	0.0183347	50.09	ILGPK(1)ASCISFK	2	1.727	1
	TRINITY_DN92383_c0_g1_m.25588	481	K	TRINITY_DN92383_c0_g1|g.25588 ORF TRINITY_DN92383_c0_g1|g.25588 TRINITY_DN92383_c0_g1_m.25588 type:complete len:496 (+) TRINITY_DN92383_c0_g1:237-1724(+)	1	0.000723861	82.437	IDRPGSFHTEWK(1)K	3	1.1051	1
	TRINITY_DN92383_c0_g1_m.25588	299	K	TRINITY_DN92383_c0_g1|g.25588 ORF TRINITY_DN92383_c0_g1|g.25588 TRINITY_DN92383_c0_g1_m.25588 type:complete len:496 (+) TRINITY_DN92383_c0_g1:237-1724(+)	1	0.0448723	40.502	YLSGLK(1)EER	2	1.0333	1
	TRINITY_DN92383_c0_g1_m.25588	41	K	TRINITY_DN92383_c0_g1|g.25588 ORF TRINITY_DN92383_c0_g1|g.25588 TRINITY_DN92383_c0_g1_m.25588 type:complete len:496 (+) TRINITY_DN92383_c0_g1:237-1724(+)	1	0.00814867	64.906	TASK(1)VDETVGR	2	-0.48632	1
	TRINITY_DN92402_c0_g1_m.25608	458	K	TRINITY_DN92402_c0_g1|g.25608 ORF TRINITY_DN92402_c0_g1|g.25608 TRINITY_DN92402_c0_g1_m.25608 type:complete len:469 (+) TRINITY_DN92402_c0_g1:169-1575(+)	1	0.000232321	119.94	FK(1)SHILTCAPK	2	-1.243	1
	TRINITY_DN92402_c0_g1_m.25608	107	K	TRINITY_DN92402_c0_g1|g.25608 ORF TRINITY_DN92402_c0_g1|g.25608 TRINITY_DN92402_c0_g1_m.25608 type:complete len:469 (+) TRINITY_DN92402_c0_g1:169-1575(+)	1	0.000563539	80.623	FK(1)TIIHPGEVNR	2	-1.0683	1
	TRINITY_DN92421_c0_g1_m.25631	229	K	TRINITY_DN92421_c0_g1|g.25631 ORF TRINITY_DN92421_c0_g1|g.25631 TRINITY_DN92421_c0_g1_m.25631 type:complete len:358 (+) TRINITY_DN92421_c0_g1:215-1288(+)	1	0.0162197	58.426	NLLWAENK(1)R	2	-2.604	1
	TRINITY_DN92421_c0_g1_m.25631	318	K	TRINITY_DN92421_c0_g1|g.25631 ORF TRINITY_DN92421_c0_g1|g.25631 TRINITY_DN92421_c0_g1_m.25631 type:complete len:358 (+) TRINITY_DN92421_c0_g1:215-1288(+)	1	4.44472e-22	203.55	DWGDDGYFK(1)ILR	2	1.428	1
	TRINITY_DN92461_c0_g1_m.25670	136	K	TRINITY_DN92461_c0_g1|g.25670 ORF TRINITY_DN92461_c0_g1|g.25670 TRINITY_DN92461_c0_g1_m.25670 type:complete len:522 (+) TRINITY_DN92461_c0_g1:77-1642(+)	1	0.00993926	72.038	IDAGK(1)FVWR	2	-1.5716	1
	TRINITY_DN92520_c0_g1_m.25730	79	K	TRINITY_DN92520_c0_g1|g.25730 ORF TRINITY_DN92520_c0_g1|g.25730 TRINITY_DN92520_c0_g1_m.25730 type:complete len:140 (+) TRINITY_DN92520_c0_g1:222-641(+)	1	8.70584e-09	101.43	SK(1)GFGFVSFEDSESAK	2	1.1115	1
	TRINITY_DN92536_c0_g1_m.25743	98	K	TRINITY_DN92536_c0_g1|g.25743 ORF TRINITY_DN92536_c0_g1|g.25743 TRINITY_DN92536_c0_g1_m.25743 type:5prime_partial len:112 (+) TRINITY_DN92536_c0_g1:1-336(+)	1	7.62216e-06	93.026	ATNPYFEDVHTALYK(1)AK	2	-1.68	1
	TRINITY_DN92536_c0_g1_m.25743	82	K	TRINITY_DN92536_c0_g1|g.25743 ORF TRINITY_DN92536_c0_g1|g.25743 TRINITY_DN92536_c0_g1_m.25743 type:5prime_partial len:112 (+) TRINITY_DN92536_c0_g1:1-336(+)	1	0.000805923	87.895	ILQWVENVK(1)K	2	-2.4419	1
	TRINITY_DN92536_c1_g1_m.25744	63	K	TRINITY_DN92536_c1_g1|g.25744 ORF TRINITY_DN92536_c1_g1|g.25744 TRINITY_DN92536_c1_g1_m.25744 type:3prime_partial len:112 (+) TRINITY_DN92536_c1_g1:91-423(+)	1	5.04574e-10	153.33	LK(1)LSESHAILR	2	-0.58508	1
	TRINITY_DN92536_c1_g1_m.25744	95	K	TRINITY_DN92536_c1_g1|g.25744 ORF TRINITY_DN92536_c1_g1|g.25744 TRINITY_DN92536_c1_g1_m.25744 type:3prime_partial len:112 (+) TRINITY_DN92536_c1_g1:91-423(+)	1	0.000239262	54.309	AK(1)VNSILDWHHSNLR	3	-2.5851	1
	TRINITY_DN92536_c1_g1_m.25744	41	K	TRINITY_DN92536_c1_g1|g.25744 ORF TRINITY_DN92536_c1_g1|g.25744 TRINITY_DN92536_c1_g1_m.25744 type:3prime_partial len:112 (+) TRINITY_DN92536_c1_g1:91-423(+)	1	0.0293371	40.386	GEHK(1)LPEYK	2	1.4248	1
	TRINITY_DN92536_c1_g2_m.25745	95	K	TRINITY_DN92536_c1_g2|g.25745 ORF TRINITY_DN92536_c1_g2|g.25745 TRINITY_DN92536_c1_g2_m.25745 type:complete len:119 (+) TRINITY_DN92536_c1_g2:86-442(+)	1	0.00102019	54.309	AK(1)INSILDWHHSNLR	3	-3.9865	1
	TRINITY_DN92615_c0_g2_m.25813	11	K	TRINITY_DN92615_c0_g2|g.25813 ORF TRINITY_DN92615_c0_g2|g.25813 TRINITY_DN92615_c0_g2_m.25813 type:complete len:152 (+) TRINITY_DN92615_c0_g2:80-535(+)	1	7.2404e-07	83.775	EPK(1)EETVTLGPK	2	-0.91442	2
	TRINITY_DN92615_c0_g3_m.25814	11	K	TRINITY_DN92615_c0_g3|g.25814 ORF TRINITY_DN92615_c0_g3|g.25814 TRINITY_DN92615_c0_g3_m.25814 type:complete len:152 (+) TRINITY_DN92615_c0_g3:87-542(+)	1	7.2404e-07	83.775	NREPK(1)EETVTLGPK	2	-2.0289	2
	TRINITY_DN92615_c0_g3_m.25814	106	K	TRINITY_DN92615_c0_g3|g.25814 ORF TRINITY_DN92615_c0_g3|g.25814 TRINITY_DN92615_c0_g3_m.25814 type:complete len:152 (+) TRINITY_DN92615_c0_g3:87-542(+)	1	0.000886737	95.138	TK(1)TPGPGAQSALR	2	-1.115	1
	TRINITY_DN92615_c0_g3_m.25814	20	K	TRINITY_DN92615_c0_g3|g.25814 ORF TRINITY_DN92615_c0_g3|g.25814 TRINITY_DN92615_c0_g3_m.25814 type:complete len:152 (+) TRINITY_DN92615_c0_g3:87-542(+)	1	0.000229895	125.98	EETVTLGPK(1)VR	2	-0.58843	1
	TRINITY_DN92664_c0_g1_m.25852	127	K	TRINITY_DN92664_c0_g1|g.25852 ORF TRINITY_DN92664_c0_g1|g.25852 TRINITY_DN92664_c0_g1_m.25852 type:complete len:153 (+) TRINITY_DN92664_c0_g1:257-715(+)	1	1.29626e-39	219.59	AVVVHADPDDLGK(1)GGHELSK	3	0.83983	2
	TRINITY_DN92664_c0_g1_m.25852	3	K	TRINITY_DN92664_c0_g1|g.25852 ORF TRINITY_DN92664_c0_g1|g.25852 TRINITY_DN92664_c0_g1_m.25852 type:complete len:153 (+) TRINITY_DN92664_c0_g1:257-715(+)	1	8.65478e-09	147.02	VK(1)AIAVLSGSEEVK	2	1.9969	2
	TRINITY_DN92664_c0_g1_m.25852	134	K	TRINITY_DN92664_c0_g1|g.25852 ORF TRINITY_DN92664_c0_g1|g.25852 TRINITY_DN92664_c0_g1_m.25852 type:complete len:153 (+) TRINITY_DN92664_c0_g1:257-715(+)	1	2.49419e-19	191.95	GGHELSK(1)STGNAGGR	2	-1.6199	2
	TRINITY_DN92685_c0_g1_m.25868	158	K	TRINITY_DN92685_c0_g1|g.25868 ORF TRINITY_DN92685_c0_g1|g.25868 TRINITY_DN92685_c0_g1_m.25868 type:complete len:243 (+) TRINITY_DN92685_c0_g1:136-864(+)	1	0.00188972	107.08	SMEK(1)DPEK	2	0.94202	2
	TRINITY_DN92685_c0_g1_m.25868	82	K	TRINITY_DN92685_c0_g1|g.25868 ORF TRINITY_DN92685_c0_g1|g.25868 TRINITY_DN92685_c0_g1_m.25868 type:complete len:243 (+) TRINITY_DN92685_c0_g1:136-864(+)	1	1.12067e-12	175.07	YK(1)ESELIHCR	2	-0.26903	1
	TRINITY_DN92720_c0_g1_m.25905	492	K	TRINITY_DN92720_c0_g1|g.25905 ORF TRINITY_DN92720_c0_g1|g.25905 TRINITY_DN92720_c0_g1_m.25905 type:5prime_partial len:530 (+) TRINITY_DN92720_c0_g1:2-1591(+)	1	1.52545e-08	111.38	TIK(1)EILAEVDTDHDGR	2	-3.1571	1
	TRINITY_DN92741_c0_g1_m.25924	346	K	TRINITY_DN92741_c0_g1|g.25924 ORF TRINITY_DN92741_c0_g1|g.25924 TRINITY_DN92741_c0_g1_m.25924 type:complete len:892 (+) TRINITY_DN92741_c0_g1:136-2811(+)	1	6.63098e-06	98.865	SPEDIYK(1)AHLIDGR	2	-1.3116	1
	TRINITY_DN92741_c0_g1_m.25924	96	K	TRINITY_DN92741_c0_g1|g.25924 ORF TRINITY_DN92741_c0_g1|g.25924 TRINITY_DN92741_c0_g1_m.25924 type:complete len:892 (+) TRINITY_DN92741_c0_g1:136-2811(+)	1	0.00582224	56.378	FLRPHYGK(1)LK	3	0.80835	1
	TRINITY_DN92741_c0_g1_m.25924	110	K	TRINITY_DN92741_c0_g1|g.25924 ORF TRINITY_DN92741_c0_g1|g.25924 TRINITY_DN92741_c0_g1_m.25924 type:complete len:892 (+) TRINITY_DN92741_c0_g1:136-2811(+)	1	1.48252e-08	112.93	AYFETMIDSDLK(1)K	2	1.2068	1
	TRINITY_DN92768_c0_g1_m.25954	61	K	TRINITY_DN92768_c0_g1|g.25954 ORF TRINITY_DN92768_c0_g1|g.25954 TRINITY_DN92768_c0_g1_m.25954 type:3prime_partial len:112 (+) TRINITY_DN92768_c0_g1:45-377(+)	1	0.0241972	49.16	VTVK(1)LTIQNR	2	-1.1395	1
	TRINITY_DN92860_c0_g1_m.26038	347	K	TRINITY_DN92860_c0_g1|g.26038 ORF TRINITY_DN92860_c0_g1|g.26038 TRINITY_DN92860_c0_g1_m.26038 type:5prime_partial len:765 (+) TRINITY_DN92860_c0_g1:3-2297(+)	1	0.0377394	51.872	GK(1)AYVDDTPR	2	0.52839	1
	TRINITY_DN92886_c0_g1_m.26068	180	K	TRINITY_DN92886_c0_g1|g.26068 ORF TRINITY_DN92886_c0_g1|g.26068 TRINITY_DN92886_c0_g1_m.26068 type:complete len:535 (+) TRINITY_DN92886_c0_g1:462-2066(+)	1	0.0149757	43.168	IIAK(1)GHYTER	2	-0.61438	1
	TRINITY_DN92907_c0_g1_m.26099	982	K	TRINITY_DN92907_c0_g1|g.26099 ORF TRINITY_DN92907_c0_g1|g.26099 TRINITY_DN92907_c0_g1_m.26099 type:complete len:1022 (+) TRINITY_DN92907_c0_g1:267-3332(+)	1	0.000513646	90.263	GTMEDIK(1)YVGR	2	2.6265	1
	TRINITY_DN92907_c0_g1_m.26099	600	K	TRINITY_DN92907_c0_g1|g.26099 ORF TRINITY_DN92907_c0_g1|g.26099 TRINITY_DN92907_c0_g1_m.26099 type:complete len:1022 (+) TRINITY_DN92907_c0_g1:267-3332(+)	0.999407	0.0694483	54.27	NTGVK(0.001)PEILK(0.999)R	2	-1.8952	1
	TRINITY_DN92907_c0_g1_m.26099	376	K	TRINITY_DN92907_c0_g1|g.26099 ORF TRINITY_DN92907_c0_g1|g.26099 TRINITY_DN92907_c0_g1_m.26099 type:complete len:1022 (+) TRINITY_DN92907_c0_g1:267-3332(+)	1	3.38503e-08	98.328	IHLSLVANPSHLEAVDPVVVGK(1)AR	3	-0.96825	1
	TRINITY_DN92907_c0_g1_m.26099	886	K	TRINITY_DN92907_c0_g1|g.26099 ORF TRINITY_DN92907_c0_g1|g.26099 TRINITY_DN92907_c0_g1_m.26099 type:complete len:1022 (+) TRINITY_DN92907_c0_g1:267-3332(+)	1	1.19582e-07	101.64	DQNDHK(1)DLEDGINR	2	-2.8077	2
	TRINITY_DN92907_c0_g1_m.26099	844	K	TRINITY_DN92907_c0_g1|g.26099 ORF TRINITY_DN92907_c0_g1|g.26099 TRINITY_DN92907_c0_g1_m.26099 type:complete len:1022 (+) TRINITY_DN92907_c0_g1:267-3332(+)	1	0.000521476	94.66	KPLIVMSPK(1)SLLR	3	-3.6604	2
	TRINITY_DN92907_c0_g1_m.26099	321	K	TRINITY_DN92907_c0_g1|g.26099 ORF TRINITY_DN92907_c0_g1|g.26099 TRINITY_DN92907_c0_g1_m.26099 type:complete len:1022 (+) TRINITY_DN92907_c0_g1:267-3332(+)	1	0.017371	40.502	QIFSEFDK(1)K	2	0.78953	1
	TRINITY_DN92907_c0_g1_m.26099	325	K	TRINITY_DN92907_c0_g1|g.26099 ORF TRINITY_DN92907_c0_g1|g.26099 TRINITY_DN92907_c0_g1_m.26099 type:complete len:1022 (+) TRINITY_DN92907_c0_g1:267-3332(+)	1	4.31457e-09	114.5	THK(1)DEDGLYTGTGDVK	2	-2.6935	1
	TRINITY_DN92907_c0_g1_m.26099	380	K	TRINITY_DN92907_c0_g1|g.26099 ORF TRINITY_DN92907_c0_g1|g.26099 TRINITY_DN92907_c0_g1_m.26099 type:complete len:1022 (+) TRINITY_DN92907_c0_g1:267-3332(+)	1	1.5821e-05	104.39	AK(1)QYYSNDVDR	2	-2.0187	1
	TRINITY_DN92907_c0_g1_m.26099	550	K	TRINITY_DN92907_c0_g1|g.26099 ORF TRINITY_DN92907_c0_g1|g.26099 TRINITY_DN92907_c0_g1_m.26099 type:complete len:1022 (+) TRINITY_DN92907_c0_g1:267-3332(+)	1	2.55662e-14	191.95	INNK(1)VESILEDEFNHSK	2	0.29042	2
	TRINITY_DN92907_c0_g1_m.26099	541	K	TRINITY_DN92907_c0_g1|g.26099 ORF TRINITY_DN92907_c0_g1|g.26099 TRINITY_DN92907_c0_g1_m.26099 type:complete len:1022 (+) TRINITY_DN92907_c0_g1:267-3332(+)	1	8.4632e-12	162.23	LVDSGVFSK(1)EDINK	2	5.6758	1
	TRINITY_DN92935_c1_g1_m.26127	155	K	TRINITY_DN92935_c1_g1|g.26127 ORF TRINITY_DN92935_c1_g1|g.26127 TRINITY_DN92935_c1_g1_m.26127 type:complete len:222 (+) TRINITY_DN92935_c1_g1:1751-2416(+)	1	3.89281e-09	85.081	NLQYYEISAK(1)SNYNFEK	2	0.081334	1
	TRINITY_DN92935_c1_g1_m.26127	145	K	TRINITY_DN92935_c1_g1|g.26127 ORF TRINITY_DN92935_c1_g1|g.26127 TRINITY_DN92935_c1_g1_m.26127 type:complete len:222 (+) TRINITY_DN92935_c1_g1:1751-2416(+)	0.962538	1.08642e-09	131.54	K(0.037)K(0.963)NLQYYEISAK	2	-1.0367	2
	TRINITY_DN92935_c1_g1_m.26127	40	K	TRINITY_DN92935_c1_g1|g.26127 ORF TRINITY_DN92935_c1_g1|g.26127 TRINITY_DN92935_c1_g1_m.26127 type:complete len:222 (+) TRINITY_DN92935_c1_g1:1751-2416(+)	1	0.000262966	108.3	HLTGEFEK(1)K	2	-0.30044	1
	TRINITY_DN92935_c1_g1_m.26127	102	K	TRINITY_DN92935_c1_g1|g.26127 ORF TRINITY_DN92935_c1_g1|g.26127 TRINITY_DN92935_c1_g1_m.26127 type:complete len:222 (+) TRINITY_DN92935_c1_g1:1751-2416(+)	1	0.000773871	99.174	LTYK(1)NVPTWHR	2	0.10452	2
	TRINITY_DN92956_c0_g1_m.26146	119	K	TRINITY_DN92956_c0_g1|g.26146 ORF TRINITY_DN92956_c0_g1|g.26146 TRINITY_DN92956_c0_g1_m.26146 type:5prime_partial len:189 (+) TRINITY_DN92956_c0_g1:1-567(+)	1	0.01531	40.224	GLADHK(1)ETLGAPLCPCR	3	-1.1791	1
	TRINITY_DN93020_c0_g1_m.26205	47	K	TRINITY_DN93020_c0_g1|g.26205 ORF TRINITY_DN93020_c0_g1|g.26205 TRINITY_DN93020_c0_g1_m.26205 type:complete len:168 (+) TRINITY_DN93020_c0_g1:130-633(+)	1	1.9781e-09	104.49	TLK(1)EIEAVPEDEGYR	2	-2.2014	1
	TRINITY_DN93031_c0_g1_m.26213	197	K	TRINITY_DN93031_c0_g1|g.26213 ORF TRINITY_DN93031_c0_g1|g.26213 TRINITY_DN93031_c0_g1_m.26213 type:complete len:482 (+) TRINITY_DN93031_c0_g1:514-1959(+)	1	0.000670883	83.623	IK(1)CSASQAK	2	0.052617	1
	TRINITY_DN93031_c0_g1_m.26213	306	K	TRINITY_DN93031_c0_g1|g.26213 ORF TRINITY_DN93031_c0_g1|g.26213 TRINITY_DN93031_c0_g1_m.26213 type:complete len:482 (+) TRINITY_DN93031_c0_g1:514-1959(+)	1	0.0531725	43.306	NLPK(1)DVSQDQLK	2	-2.7518	1
	TRINITY_DN93031_c0_g1_m.26213	204	K	TRINITY_DN93031_c0_g1|g.26213 ORF TRINITY_DN93031_c0_g1|g.26213 TRINITY_DN93031_c0_g1_m.26213 type:complete len:482 (+) TRINITY_DN93031_c0_g1:514-1959(+)	1	9.41462e-06	129.72	CSASQAK(1)HR	2	-0.47948	1
	TRINITY_DN93031_c0_g1_m.26213	314	K	TRINITY_DN93031_c0_g1|g.26213 ORF TRINITY_DN93031_c0_g1|g.26213 TRINITY_DN93031_c0_g1_m.26213 type:complete len:482 (+) TRINITY_DN93031_c0_g1:514-1959(+)	1	0.0171679	51.864	DVSQDQLK(1)K	2	-1.1641	1
	TRINITY_DN93031_c0_g1_m.26213	222	K	TRINITY_DN93031_c0_g1|g.26213 ORF TRINITY_DN93031_c0_g1|g.26213 TRINITY_DN93031_c0_g1_m.26213 type:complete len:482 (+) TRINITY_DN93031_c0_g1:514-1959(+)	1	0.00165472	62.969	SWSEDDLK(1)K	2	0.35673	1
	TRINITY_DN93031_c0_g1_m.26213	297	K	TRINITY_DN93031_c0_g1|g.26213 ORF TRINITY_DN93031_c0_g1|g.26213 TRINITY_DN93031_c0_g1_m.26213 type:complete len:482 (+) TRINITY_DN93031_c0_g1:514-1959(+)	1	6.19197e-06	99.276	SGDSSSQIK(1)SVYVK	2	-1.3527	1
	TRINITY_DN93166_c0_g1_m.26337	162	K	TRINITY_DN93166_c0_g1|g.26337 ORF TRINITY_DN93166_c0_g1|g.26337 TRINITY_DN93166_c0_g1_m.26337 type:complete len:394 (+) TRINITY_DN93166_c0_g1:191-1372(+)	1	0.000305408	51.569	LAASEIPK(1)IVEQYR	2	-2.489	1
	TRINITY_DN93166_c0_g1_m.26337	273	K	TRINITY_DN93166_c0_g1|g.26337 ORF TRINITY_DN93166_c0_g1|g.26337 TRINITY_DN93166_c0_g1_m.26337 type:complete len:394 (+) TRINITY_DN93166_c0_g1:191-1372(+)	1	9.28582e-07	104.15	LNAIQSTAGEK(1)LAYLHVTQPR	3	-1.3177	1
	TRINITY_DN93189_c1_g1_m.26362	331	K	TRINITY_DN93189_c1_g1|g.26362 ORF TRINITY_DN93189_c1_g1|g.26362 TRINITY_DN93189_c1_g1_m.26362 type:complete len:398 (+) TRINITY_DN93189_c1_g1:108-1301(+)	1	0.0113529	81.799	PK(1)EEIAK	2	0.72424	2
	TRINITY_DN93218_c0_g1_m.26392	253	K	TRINITY_DN93218_c0_g1|g.26392 ORF TRINITY_DN93218_c0_g1|g.26392 TRINITY_DN93218_c0_g1_m.26392 type:complete len:273 (+) TRINITY_DN93218_c0_g1:214-1032(+)	1	0.000826909	94.66	AALQK(1)VQEQSK	2	-0.94089	1
	TRINITY_DN93236_c1_g1_m.26407	152	K	TRINITY_DN93236_c1_g1|g.26407 ORF TRINITY_DN93236_c1_g1|g.26407 TRINITY_DN93236_c1_g1_m.26407 type:complete len:473 (+) TRINITY_DN93236_c1_g1:176-1594(+)	1	0.000446733	51.128	IVEK(1)YTNSNIEIHTFNQSQYPR	3	-4.9238	1
	TRINITY_DN93236_c1_g1_m.26407	182	K	TRINITY_DN93236_c1_g1|g.26407 ORF TRINITY_DN93236_c1_g1|g.26407 TRINITY_DN93236_c1_g1_m.26407 type:complete len:473 (+) TRINITY_DN93236_c1_g1:176-1594(+)	1	0.0015955	73.502	LVIDDFLPLPSK(1)GETGR	2	3.0585	1
	TRINITY_DN93236_c1_g1_m.26407	259	K	TRINITY_DN93236_c1_g1|g.26407 ORF TRINITY_DN93236_c1_g1|g.26407 TRINITY_DN93236_c1_g1_m.26407 type:complete len:473 (+) TRINITY_DN93236_c1_g1:176-1594(+)	1	6.56768e-26	184.65	TLADVK(1)GGTLISYEGR	2	-0.7424	1
	TRINITY_DN93236_c1_g1_m.26407	305	K	TRINITY_DN93236_c1_g1|g.26407 ORF TRINITY_DN93236_c1_g1|g.26407 TRINITY_DN93236_c1_g1_m.26407 type:complete len:473 (+) TRINITY_DN93236_c1_g1:176-1594(+)	1	4.20853e-09	114.93	IFNTNNLWVNLK(1)AIK	2	1.8692	1
	TRINITY_DN93236_c1_g1_m.26407	464	K	TRINITY_DN93236_c1_g1|g.26407 ORF TRINITY_DN93236_c1_g1|g.26407 TRINITY_DN93236_c1_g1_m.26407 type:complete len:473 (+) TRINITY_DN93236_c1_g1:176-1594(+)	1	1.8946e-12	183	LQVPDDAVIENK(1)EIK	2	-1.0054	1
	TRINITY_DN93236_c1_g1_m.26407	414	K	TRINITY_DN93236_c1_g1|g.26407 ORF TRINITY_DN93236_c1_g1|g.26407 TRINITY_DN93236_c1_g1_m.26407 type:complete len:473 (+) TRINITY_DN93236_c1_g1:176-1594(+)	1	5.71954e-12	163.09	FK(1)SIPSIVELDSLK	2	3.0588	1
	TRINITY_DN93236_c1_g1_m.26407	10	K	TRINITY_DN93236_c1_g1|g.26407 ORF TRINITY_DN93236_c1_g1|g.26407 TRINITY_DN93236_c1_g1_m.26407 type:complete len:473 (+) TRINITY_DN93236_c1_g1:176-1594(+)	1	0.00297492	79.311	AAVASETEK(1)ISK	2	3.215	1
	TRINITY_DN93236_c1_g1_m.26407	13	K	TRINITY_DN93236_c1_g1|g.26407 ORF TRINITY_DN93236_c1_g1|g.26407 TRINITY_DN93236_c1_g1_m.26407 type:complete len:473 (+) TRINITY_DN93236_c1_g1:176-1594(+)	1	5.98212e-15	153.26	ISK(1)LQTSVAGLDQISENEK	2	-2.031	2
	TRINITY_DN93236_c1_g1_m.26407	325	K	TRINITY_DN93236_c1_g1|g.26407 ORF TRINITY_DN93236_c1_g1|g.26407 TRINITY_DN93236_c1_g1_m.26407 type:complete len:473 (+) TRINITY_DN93236_c1_g1:176-1594(+)	1	0.000916709	68.108	MEIIPNPK(1)EVDGIK	2	-0.58931	1
	TRINITY_DN93236_c1_g1_m.26407	82	K	TRINITY_DN93236_c1_g1|g.26407 ORF TRINITY_DN93236_c1_g1|g.26407 TRINITY_DN93236_c1_g1_m.26407 type:complete len:473 (+) TRINITY_DN93236_c1_g1:176-1594(+)	1	0.0101321	67.881	ILDK(1)LAVLK	2	0.43848	1
	TRINITY_DN93236_c1_g1_m.26407	404	K	TRINITY_DN93236_c1_g1|g.26407 ORF TRINITY_DN93236_c1_g1|g.26407 TRINITY_DN93236_c1_g1_m.26407 type:complete len:473 (+) TRINITY_DN93236_c1_g1:176-1594(+)	1	2.32335e-25	164.3	KNPANPSVELGPEFK(1)K	2	-3.155	2
	TRINITY_DN93301_c0_g1_m.26492	897	K	TRINITY_DN93301_c0_g1|g.26492 ORF TRINITY_DN93301_c0_g1|g.26492 TRINITY_DN93301_c0_g1_m.26492 type:complete len:978 (+) TRINITY_DN93301_c0_g1:194-3127(+)	1	0.0145335	46.068	IPEALNVK(1)GEYR	2	-1.3656	1
	TRINITY_DN93306_c0_g1_m.26499	271	K	TRINITY_DN93306_c0_g1|g.26499 ORF TRINITY_DN93306_c0_g1|g.26499 TRINITY_DN93306_c0_g1_m.26499 type:complete len:294 (+) TRINITY_DN93306_c0_g1:195-1076(+)	1	0.0606146	51.864	VIYQTK(1)VK	2	-1.204	1
	TRINITY_DN93306_c0_g1_m.26499	99	K	TRINITY_DN93306_c0_g1|g.26499 ORF TRINITY_DN93306_c0_g1|g.26499 TRINITY_DN93306_c0_g1_m.26499 type:complete len:294 (+) TRINITY_DN93306_c0_g1:195-1076(+)	1	0.0264909	50.09	NK(1)VTVAGLHDK	2	-0.59099	1
	TRINITY_DN93311_c0_g1_m.26500	438	K	TRINITY_DN93311_c0_g1|g.26500 ORF TRINITY_DN93311_c0_g1|g.26500 TRINITY_DN93311_c0_g1_m.26500 type:complete len:481 (+) TRINITY_DN93311_c0_g1:359-1801(+)	1	0.000930232	62.454	ALHEDSVFLVTSK(1)R	2	-4.9781	1
	TRINITY_DN93401_c0_g1_m.26593	431	K	TRINITY_DN93401_c0_g1|g.26593 ORF TRINITY_DN93401_c0_g1|g.26593 TRINITY_DN93401_c0_g1_m.26593 type:5prime_partial len:1228 (+) TRINITY_DN93401_c0_g1:1-3684(+)	1	0.0558108	46.068	SSALASK(1)ATGFPIAK	2	-3.4691	1
	TRINITY_DN93401_c0_g1_m.26593	986	K	TRINITY_DN93401_c0_g1|g.26593 ORF TRINITY_DN93401_c0_g1|g.26593 TRINITY_DN93401_c0_g1_m.26593 type:5prime_partial len:1228 (+) TRINITY_DN93401_c0_g1:1-3684(+)	1	0.0567016	43.613	TVPFVSK(1)AIGHPLAK	2	-1.1999	1
	TRINITY_DN93401_c0_g1_m.26593	644	K	TRINITY_DN93401_c0_g1|g.26593 ORF TRINITY_DN93401_c0_g1|g.26593 TRINITY_DN93401_c0_g1_m.26593 type:5prime_partial len:1228 (+) TRINITY_DN93401_c0_g1:1-3684(+)	1	0.0175306	63.397	ISSGVIPAYK(1)R	2	-1.7731	1
	TRINITY_DN93401_c0_g1_m.26593	1081	K	TRINITY_DN93401_c0_g1|g.26593 ORF TRINITY_DN93401_c0_g1|g.26593 TRINITY_DN93401_c0_g1_m.26593 type:5prime_partial len:1228 (+) TRINITY_DN93401_c0_g1:1-3684(+)	1	1.11922e-07	136.06	LPVDDDGLLGSK(1)K	2	0.89599	1
	TRINITY_DN93402_c0_g1_m.26596	163	K	TRINITY_DN93402_c0_g1|g.26596 ORF TRINITY_DN93402_c0_g1|g.26596 TRINITY_DN93402_c0_g1_m.26596 type:5prime_partial len:238 (+) TRINITY_DN93402_c0_g1:2-715(+)	1	5.83315e-09	110.14	AQEVK(1)LSHVLDIYEK	2	-2.8398	2
	TRINITY_DN93402_c0_g1_m.26596	173	K	TRINITY_DN93402_c0_g1|g.26596 ORF TRINITY_DN93402_c0_g1|g.26596 TRINITY_DN93402_c0_g1_m.26596 type:5prime_partial len:238 (+) TRINITY_DN93402_c0_g1:2-715(+)	1	9.63782e-09	107.6	LSHVLDIYEK(1)QLAETK	2	-1.6286	2
	TRINITY_DN93402_c0_g1_m.26596	101	K	TRINITY_DN93402_c0_g1|g.26596 ORF TRINITY_DN93402_c0_g1|g.26596 TRINITY_DN93402_c0_g1_m.26596 type:5prime_partial len:238 (+) TRINITY_DN93402_c0_g1:2-715(+)	1	7.25177e-05	110.58	YLANHYK(1)GSGPDLLR	2	-1.6431	2
	TRINITY_DN93402_c0_g1_m.26596	94	K	TRINITY_DN93402_c0_g1|g.26596 ORF TRINITY_DN93402_c0_g1|g.26596 TRINITY_DN93402_c0_g1_m.26596 type:5prime_partial len:238 (+) TRINITY_DN93402_c0_g1:2-715(+)	1	0.00130892	56.378	AINK(1)YLANHYK	2	-2.5095	1
	TRINITY_DN93435_c0_g2_m.26640	131	K	TRINITY_DN93435_c0_g2|g.26640 ORF TRINITY_DN93435_c0_g2|g.26640 TRINITY_DN93435_c0_g2_m.26640 type:5prime_partial len:234 (+) TRINITY_DN93435_c0_g2:3-704(+)	1	4.73181e-09	145.75	LK(1)GEALQEAK	2	-0.42782	1
	TRINITY_DN93435_c0_g2_m.26640	40	K	TRINITY_DN93435_c0_g2|g.26640 ORF TRINITY_DN93435_c0_g2|g.26640 TRINITY_DN93435_c0_g2_m.26640 type:5prime_partial len:234 (+) TRINITY_DN93435_c0_g2:3-704(+)	1	0.011308	57.003	IALAEK(1)EVEYEYK	2	-2.0727	1
	TRINITY_DN93435_c0_g2_m.26640	211	K	TRINITY_DN93435_c0_g2|g.26640 ORF TRINITY_DN93435_c0_g2|g.26640 TRINITY_DN93435_c0_g2_m.26640 type:5prime_partial len:234 (+) TRINITY_DN93435_c0_g2:3-704(+)	1	0.00190995	94.66	ASVAK(1)TLYEPK	2	0.23576	1
	TRINITY_DN93515_c0_g1_m.26724	33	K	TRINITY_DN93515_c0_g1|g.26724 ORF TRINITY_DN93515_c0_g1|g.26724 TRINITY_DN93515_c0_g1_m.26724 type:complete len:149 (+) TRINITY_DN93515_c0_g1:124-570(+)	0.999936	0.0543435	58.426	KGFYLK(1)GLK	2	0.64471	1
	TRINITY_DN93515_c0_g1_m.26724	36	K	TRINITY_DN93515_c0_g1|g.26724 ORF TRINITY_DN93515_c0_g1|g.26724 TRINITY_DN93515_c0_g1_m.26724 type:complete len:149 (+) TRINITY_DN93515_c0_g1:124-570(+)	1	0.00414792	83.623	GLK(1)LITVER	2	0.10461	1
	TRINITY_DN93515_c0_g1_m.26724	9	K	TRINITY_DN93515_c0_g1|g.26724 ORF TRINITY_DN93515_c0_g1|g.26724 TRINITY_DN93515_c0_g1_m.26724 type:complete len:149 (+) TRINITY_DN93515_c0_g1:124-570(+)	1	6.45044e-06	84.102	MEQTFIMIK(1)PDGVQR	2	2.8168	1
	TRINITY_DN93515_c0_g1_m.26724	47	K	TRINITY_DN93515_c0_g1|g.26724 ORF TRINITY_DN93515_c0_g1|g.26724 TRINITY_DN93515_c0_g1_m.26724 type:complete len:149 (+) TRINITY_DN93515_c0_g1:124-570(+)	1	1.33228e-09	159.44	SFAEK(1)HYEDLSAK	2	-2.7441	1
	TRINITY_DN93605_c0_g1_m.26848	427	K	TRINITY_DN93605_c0_g1|g.26848 ORF TRINITY_DN93605_c0_g1|g.26848 TRINITY_DN93605_c0_g1_m.26848 type:complete len:457 (+) TRINITY_DN93605_c0_g1:174-1544(+)	1	0.0505169	43.272	WHVYMTK(1)DGR	2	0.67091	1
	TRINITY_DN93605_c0_g1_m.26848	188	K	TRINITY_DN93605_c0_g1|g.26848 ORF TRINITY_DN93605_c0_g1|g.26848 TRINITY_DN93605_c0_g1_m.26848 type:complete len:457 (+) TRINITY_DN93605_c0_g1:174-1544(+)	1	9.68685e-06	73.305	VLISSPSWGNHK(1)NIFNDAR	3	-1.7044	1
	TRINITY_DN93605_c0_g1_m.26848	82	K	TRINITY_DN93605_c0_g1|g.26848 ORF TRINITY_DN93605_c0_g1|g.26848 TRINITY_DN93605_c0_g1_m.26848 type:complete len:457 (+) TRINITY_DN93605_c0_g1:174-1544(+)	1	7.26694e-06	99.589	ADTSDVK(1)LNLGVGAYR	2	1.788	1
	TRINITY_DN93615_c0_g10_m.26862	643	K	TRINITY_DN93615_c0_g10|g.26862 ORF TRINITY_DN93615_c0_g10|g.26862 TRINITY_DN93615_c0_g10_m.26862 type:complete len:698 (+) TRINITY_DN93615_c0_g10:294-2387(+)	1	1.16421e-09	114.39	EVHASLVK(1)AAR	2	-0.30596	1
	TRINITY_DN93615_c0_g10_m.26862	203	K	TRINITY_DN93615_c0_g10|g.26862 ORF TRINITY_DN93615_c0_g10|g.26862 TRINITY_DN93615_c0_g10_m.26862 type:complete len:698 (+) TRINITY_DN93615_c0_g10:294-2387(+)	1	0.0015334	48.701	LIDISGQLDTVK(1)R	2	-0.4592	1
	TRINITY_DN93615_c0_g10_m.26862	85	K	TRINITY_DN93615_c0_g10|g.26862 ORF TRINITY_DN93615_c0_g10|g.26862 TRINITY_DN93615_c0_g10_m.26862 type:complete len:698 (+) TRINITY_DN93615_c0_g10:294-2387(+)	1	0.054417	45.489	FISK(1)ESEK	2	-0.88522	1
	TRINITY_DN93641_c1_g1_m.26896	30	K	TRINITY_DN93641_c1_g1|g.26896 ORF TRINITY_DN93641_c1_g1|g.26896 TRINITY_DN93641_c1_g1_m.26896 type:complete len:324 (+) TRINITY_DN93641_c1_g1:85-1056(+)	1	0.000352113	72.365	FDEK(1)SWAIAR	2	-1.1278	1
	TRINITY_DN93759_c0_g2_m.27046	91	K	TRINITY_DN93759_c0_g2|g.27046 ORF TRINITY_DN93759_c0_g2|g.27046 TRINITY_DN93759_c0_g2_m.27046 type:5prime_partial len:289 (+) TRINITY_DN93759_c0_g2:3-869(+)	1	4.50485e-23	184.43	VK(1)EILSHYPSNYK	2	-1.1571	1
	TRINITY_DN93813_c0_g1_m.27115	488	K	TRINITY_DN93813_c0_g1|g.27115 ORF TRINITY_DN93813_c0_g1|g.27115 TRINITY_DN93813_c0_g1_m.27115 type:complete len:515 (+) TRINITY_DN93813_c0_g1:69-1613(+)	1	3.82184e-05	116.13	GAGHEVPLHK(1)PK	3	0.55213	2
	TRINITY_DN93813_c0_g1_m.27115	214	K	TRINITY_DN93813_c0_g1|g.27115 ORF TRINITY_DN93813_c0_g1|g.27115 TRINITY_DN93813_c0_g1_m.27115 type:complete len:515 (+) TRINITY_DN93813_c0_g1:69-1613(+)	1	0.000232075	99.34	WFK(1)QFPQYEGR	2	0.29955	1
	TRINITY_DN93813_c0_g1_m.27115	490	K	TRINITY_DN93813_c0_g1|g.27115 ORF TRINITY_DN93813_c0_g1|g.27115 TRINITY_DN93813_c0_g1_m.27115 type:complete len:515 (+) TRINITY_DN93813_c0_g1:69-1613(+)	1	1.5086e-06	91.457	PK(1)QALLLIK	2	-0.30524	2
	TRINITY_DN93867_c0_g1_m.27171	384	K	TRINITY_DN93867_c0_g1|g.27171 ORF TRINITY_DN93867_c0_g1|g.27171 TRINITY_DN93867_c0_g1_m.27171 type:5prime_partial len:510 (+) TRINITY_DN93867_c0_g1:1-1530(+)	1	1.91357e-14	116.95	NIGLSSGK(1)CGIAMEASYPVK	2	2.2961	1
	TRINITY_DN93867_c0_g1_m.27171	308	K	TRINITY_DN93867_c0_g1|g.27171 ORF TRINITY_DN93867_c0_g1|g.27171 TRINITY_DN93867_c0_g1_m.27171 type:5prime_partial len:510 (+) TRINITY_DN93867_c0_g1:1-1530(+)	1	0.00804429	51.829	IAVAK(1)QPVSVAIEGSGR	2	-0.59836	1
	TRINITY_DN93867_c0_g1_m.27171	189	K	TRINITY_DN93867_c0_g1|g.27171 ORF TRINITY_DN93867_c0_g1|g.27171 TRINITY_DN93867_c0_g1_m.27171 type:5prime_partial len:510 (+) TRINITY_DN93867_c0_g1:1-1530(+)	1	0.00021079	88.181	EK(1)GAVLPIK	2	-1.8793	1
	TRINITY_DN93867_c0_g1_m.27171	292	K	TRINITY_DN93867_c0_g1|g.27171 ORF TRINITY_DN93867_c0_g1|g.27171 TRINITY_DN93867_c0_g1_m.27171 type:5prime_partial len:510 (+) TRINITY_DN93867_c0_g1:1-1530(+)	1	6.63697e-29	153.08	VVSIDGYK(1)DVPENDENALK	2	-2.18	1
	TRINITY_DN93867_c0_g1_m.27171	303	K	TRINITY_DN93867_c0_g1|g.27171 ORF TRINITY_DN93867_c0_g1|g.27171 TRINITY_DN93867_c0_g1_m.27171 type:5prime_partial len:510 (+) TRINITY_DN93867_c0_g1:1-1530(+)	1	0.00294647	40.224	DVPENDENALK(1)IAVAK	2	2.138	1
	TRINITY_DN93893_c3_g1_m.27195	111	K	TRINITY_DN93893_c3_g1|g.27195 ORF TRINITY_DN93893_c3_g1|g.27195 TRINITY_DN93893_c3_g1_m.27195 type:complete len:446 (+) TRINITY_DN93893_c3_g1:103-1440(+)	1	0.0062987	60.547	SK(1)GYGFITFR	2	-1.9275	1
	TRINITY_DN93985_c0_g1_m.27299	213	K	TRINITY_DN93985_c0_g1|g.27299 ORF TRINITY_DN93985_c0_g1|g.27299 TRINITY_DN93985_c0_g1_m.27299 type:complete len:235 (+) TRINITY_DN93985_c0_g1:104-808(+)	1	0.00537829	47.57	THEK(1)VDSLGENR	2	-0.98282	1
	TRINITY_DN93986_c0_g1_m.27300	306	K	TRINITY_DN93986_c0_g1|g.27300 ORF TRINITY_DN93986_c0_g1|g.27300 TRINITY_DN93986_c0_g1_m.27300 type:complete len:715 (+) TRINITY_DN93986_c0_g1:196-2340(+)	1	0.000449509	61.067	GCLLVGPPGTGK(1)TLLAR	2	1.1041	1
	TRINITY_DN93986_c0_g1_m.27300	291	K	TRINITY_DN93986_c0_g1|g.27300 ORF TRINITY_DN93986_c0_g1|g.27300 TRINITY_DN93986_c0_g1_m.27300 type:complete len:715 (+) TRINITY_DN93986_c0_g1:196-2340(+)	1	0.0105328	76.605	YTALGAK(1)IPK	2	-2.539	1
	TRINITY_DN93986_c0_g1_m.27300	280	K	TRINITY_DN93986_c0_g1|g.27300 ORF TRINITY_DN93986_c0_g1|g.27300 TRINITY_DN93986_c0_g1_m.27300 type:complete len:715 (+) TRINITY_DN93986_c0_g1:196-2340(+)	1	0.000237519	72.031	LELQEVVDFLK(1)NPDK	2	2.0121	1
	TRINITY_DN93986_c0_g1_m.27300	486	K	TRINITY_DN93986_c0_g1|g.27300 ORF TRINITY_DN93986_c0_g1|g.27300 TRINITY_DN93986_c0_g1_m.27300 type:complete len:715 (+) TRINITY_DN93986_c0_g1:196-2340(+)	0.999964	9.72941e-08	101.43	DLK(1)EISKDEISDALER	3	-2.7979	3
	TRINITY_DN93986_c0_g1_m.27300	143	K	TRINITY_DN93986_c0_g1|g.27300 ORF TRINITY_DN93986_c0_g1|g.27300 TRINITY_DN93986_c0_g1_m.27300 type:complete len:715 (+) TRINITY_DN93986_c0_g1:196-2340(+)	1	2.11127e-06	146.27	YSEFLSAVK(1)K	2	-2.021	1
	TRINITY_DN93986_c0_g1_m.27300	684	K	TRINITY_DN93986_c0_g1|g.27300 ORF TRINITY_DN93986_c0_g1|g.27300 TRINITY_DN93986_c0_g1_m.27300 type:complete len:715 (+) TRINITY_DN93986_c0_g1:196-2340(+)	1	5.00178e-07	109.42	QIITTHVDILHK(1)LAQLLIEK	3	-1.0646	1
	TRINITY_DN93986_c0_g1_m.27300	456	K	TRINITY_DN93986_c0_g1|g.27300 ORF TRINITY_DN93986_c0_g1|g.27300 TRINITY_DN93986_c0_g1_m.27300 type:complete len:715 (+) TRINITY_DN93986_c0_g1:196-2340(+)	1	0.0217312	58.916	DVDFEK(1)IAR	2	-1.9296	1
	TRINITY_DN93986_c0_g1_m.27300	672	K	TRINITY_DN93986_c0_g1|g.27300 ORF TRINITY_DN93986_c0_g1|g.27300 TRINITY_DN93986_c0_g1_m.27300 type:complete len:715 (+) TRINITY_DN93986_c0_g1:196-2340(+)	1	1.37812e-05	90.689	AK(1)QIITTHVDILHK	2	-1.2072	2
	TRINITY_DN93986_c0_g1_m.27300	154	K	TRINITY_DN93986_c0_g1|g.27300 ORF TRINITY_DN93986_c0_g1|g.27300 TRINITY_DN93986_c0_g1_m.27300 type:complete len:715 (+) TRINITY_DN93986_c0_g1:196-2340(+)	1	3.90068e-06	133.93	FSK(1)DGGALQLTAVDGR	2	0.35547	1
	TRINITY_DN93986_c0_g1_m.27300	666	K	TRINITY_DN93986_c0_g1|g.27300 ORF TRINITY_DN93986_c0_g1|g.27300 TRINITY_DN93986_c0_g1_m.27300 type:complete len:715 (+) TRINITY_DN93986_c0_g1:196-2340(+)	1	0.0494531	46.447	ELVEK(1)SYSR	2	-0.24177	1
	TRINITY_DN93986_c0_g1_m.27300	515	K	TRINITY_DN93986_c0_g1|g.27300 ORF TRINITY_DN93986_c0_g1|g.27300 TRINITY_DN93986_c0_g1_m.27300 type:complete len:715 (+) TRINITY_DN93986_c0_g1:196-2340(+)	1	0.0137424	52.591	NAVVSEEK(1)K	2	1.0818	2
	TRINITY_DN94095_c0_g1_m.27422	4	K	TRINITY_DN94095_c0_g1|g.27422 ORF TRINITY_DN94095_c0_g1|g.27422 TRINITY_DN94095_c0_g1_m.27422 type:complete len:369 (+) TRINITY_DN94095_c0_g1:203-1309(+)	1	0.000901838	51.454	ALK(1)HAAENFSK	2	3.573	1
	TRINITY_DN94238_c0_g1_m.27588	125	K	TRINITY_DN94238_c0_g1|g.27588 ORF TRINITY_DN94238_c0_g1|g.27588 TRINITY_DN94238_c0_g1_m.27588 type:complete len:267 (+) TRINITY_DN94238_c0_g1:147-947(+)	1	4.41855e-07	122.51	NGVK(1)FGEAVWFK	2	0.26425	1
	TRINITY_DN94238_c0_g1_m.27588	43	K	TRINITY_DN94238_c0_g1|g.27588 ORF TRINITY_DN94238_c0_g1|g.27588 TRINITY_DN94238_c0_g1_m.27588 type:complete len:267 (+) TRINITY_DN94238_c0_g1:147-947(+)	1	1.17071e-19	178.03	TVK(1)SVPQSIWYGPDRPK	2	-0.8227	3
	TRINITY_DN94238_c0_g1_m.27588	211	K	TRINITY_DN94238_c0_g1|g.27588 ORF TRINITY_DN94238_c0_g1|g.27588 TRINITY_DN94238_c0_g1_m.27588 type:complete len:267 (+) TRINITY_DN94238_c0_g1:147-947(+)	1	0.00120987	67.251	IYPGGAFDPLGLADDPEAFAELK(1)VK	3	0.76513	1
	TRINITY_DN94319_c0_g1_m.27678	139	K	TRINITY_DN94319_c0_g1|g.27678 ORF TRINITY_DN94319_c0_g1|g.27678 TRINITY_DN94319_c0_g1_m.27678 type:complete len:348 (+) TRINITY_DN94319_c0_g1:115-1158(+)	1	6.71277e-12	132.9	NMESTQK(1)ALEEPSK	2	-1.5382	1
	TRINITY_DN94319_c0_g1_m.27678	247	K	TRINITY_DN94319_c0_g1|g.27678 ORF TRINITY_DN94319_c0_g1|g.27678 TRINITY_DN94319_c0_g1_m.27678 type:complete len:348 (+) TRINITY_DN94319_c0_g1:115-1158(+)	1	0.00313613	53.028	SITVK(1)LADTQHK	2	-0.6026	1
	TRINITY_DN94362_c0_g1_m.27735	412	K	TRINITY_DN94362_c0_g1|g.27735 ORF TRINITY_DN94362_c0_g1|g.27735 TRINITY_DN94362_c0_g1_m.27735 type:complete len:696 (+) TRINITY_DN94362_c0_g1:292-2379(+)	1	1.01405e-15	187.85	TEILK(1)VHASNK	2	-1.6816	1
	TRINITY_DN94362_c0_g1_m.27735	629	K	TRINITY_DN94362_c0_g1|g.27735 ORF TRINITY_DN94362_c0_g1|g.27735 TRINITY_DN94362_c0_g1_m.27735 type:complete len:696 (+) TRINITY_DN94362_c0_g1:292-2379(+)	1	0.00332899	65.933	LAEDIDAAVK(1)R	2	-2.2303	1
	TRINITY_DN94362_c0_g1_m.27735	463	K	TRINITY_DN94362_c0_g1|g.27735 ORF TRINITY_DN94362_c0_g1|g.27735 TRINITY_DN94362_c0_g1_m.27735 type:complete len:696 (+) TRINITY_DN94362_c0_g1:292-2379(+)	1	4.11838e-08	130.99	MAISSK(1)EIDDSIDR	2	-4.5539	1
	TRINITY_DN94362_c0_g1_m.27735	278	K	TRINITY_DN94362_c0_g1|g.27735 ORF TRINITY_DN94362_c0_g1|g.27735 TRINITY_DN94362_c0_g1_m.27735 type:complete len:696 (+) TRINITY_DN94362_c0_g1:292-2379(+)	1	0.000182003	90.156	GVLLIGPPGTGK(1)TLLAK	2	0.36949	1
	TRINITY_DN94362_c0_g1_m.27735	266	K	TRINITY_DN94362_c0_g1|g.27735 ORF TRINITY_DN94362_c0_g1|g.27735 TRINITY_DN94362_c0_g1_m.27735 type:complete len:696 (+) TRINITY_DN94362_c0_g1:292-2379(+)	1	8.09095e-06	121.69	IPK(1)GVLLIGPPGTGK	2	-0.12775	1
	TRINITY_DN94362_c0_g1_m.27735	108	K	TRINITY_DN94362_c0_g1|g.27735 ORF TRINITY_DN94362_c0_g1|g.27735 TRINITY_DN94362_c0_g1_m.27735 type:complete len:696 (+) TRINITY_DN94362_c0_g1:292-2379(+)	1	0.00730562	52.591	FLEYLDK(1)DR	2	1.3834	1
	TRINITY_DN94362_c0_g1_m.27735	218	K	TRINITY_DN94362_c0_g1|g.27735 ORF TRINITY_DN94362_c0_g1|g.27735 TRINITY_DN94362_c0_g1_m.27735 type:complete len:696 (+) TRINITY_DN94362_c0_g1:292-2379(+)	1	3.06523e-07	82.747	SSGGLGGPGGPGFPLGFGQSK(1)AK	2	-0.77305	1
	TRINITY_DN94362_c0_g1_m.27735	153	K	TRINITY_DN94362_c0_g1|g.27735 ORF TRINITY_DN94362_c0_g1|g.27735 TRINITY_DN94362_c0_g1_m.27735 type:complete len:696 (+) TRINITY_DN94362_c0_g1:292-2379(+)	1	1.13882e-05	108.91	VQLPGLSQELLQK(1)LR	2	3.081	1
	TRINITY_DN94424_c0_g1_m.27824	127	K	TRINITY_DN94424_c0_g1|g.27824 ORF TRINITY_DN94424_c0_g1|g.27824 TRINITY_DN94424_c0_g1_m.27824 type:complete len:388 (+) TRINITY_DN94424_c0_g1:150-1313(+)	1	0.0145026	61.48	MQIASFK(1)LEK	2	-0.7307	1
	TRINITY_DN94424_c0_g1_m.27824	369	K	TRINITY_DN94424_c0_g1|g.27824 ORF TRINITY_DN94424_c0_g1|g.27824 TRINITY_DN94424_c0_g1_m.27824 type:complete len:388 (+) TRINITY_DN94424_c0_g1:150-1313(+)	1	0.00273279	87.251	LDSWLGK(1)VR	2	1.7429	1
	TRINITY_DN94453_c1_g2_m.27864	35	K	TRINITY_DN94453_c1_g2|g.27864 ORF TRINITY_DN94453_c1_g2|g.27864 TRINITY_DN94453_c1_g2_m.27864 type:complete len:402 (+) TRINITY_DN94453_c1_g2:154-1359(+)	1	1.47432e-06	115.24	VDLNVPLDDNLK(1)ITDDTR	2	1.6766	1
	TRINITY_DN94453_c1_g2_m.27864	11	K	TRINITY_DN94453_c1_g2|g.27864 ORF TRINITY_DN94453_c1_g2|g.27864 TRINITY_DN94453_c1_g2_m.27864 type:complete len:402 (+) TRINITY_DN94453_c1_g2:154-1359(+)	1	0.00689389	85.821	SVGDLK(1)GADLK	2	-1.586	1
	TRINITY_DN94453_c1_g2_m.27864	206	K	TRINITY_DN94453_c1_g2|g.27864 ORF TRINITY_DN94453_c1_g2|g.27864 TRINITY_DN94453_c1_g2_m.27864 type:complete len:402 (+) TRINITY_DN94453_c1_g2:154-1359(+)	1	5.73119e-12	153.52	VSTK(1)IGVMESLLEK	2	-1.3119	1
	TRINITY_DN94453_c1_g2_m.27864	165	K	TRINITY_DN94453_c1_g2|g.27864 ORF TRINITY_DN94453_c1_g2|g.27864 TRINITY_DN94453_c1_g2_m.27864 type:complete len:402 (+) TRINITY_DN94453_c1_g2:154-1359(+)	1	4.63578e-05	90.306	AHASTEGVTK(1)YLK	2	-3.2965	1
	TRINITY_DN94453_c1_g2_m.27864	129	K	TRINITY_DN94453_c1_g2|g.27864 ORF TRINITY_DN94453_c1_g2|g.27864 TRINITY_DN94453_c1_g2_m.27864 type:complete len:402 (+) TRINITY_DN94453_c1_g2:154-1359(+)	1	1.33157e-16	146.37	EEEK(1)NDPEFAK	2	1.1916	3
	TRINITY_DN94453_c1_g2_m.27864	78	K	TRINITY_DN94453_c1_g2|g.27864 ORF TRINITY_DN94453_c1_g2|g.27864 TRINITY_DN94453_c1_g2_m.27864 type:complete len:402 (+) TRINITY_DN94453_c1_g2:154-1359(+)	1	1.07994e-07	158.61	YSLK(1)PLVPR	2	-2.6227	1
	TRINITY_DN94453_c1_g2_m.27864	341	K	TRINITY_DN94453_c1_g2|g.27864 ORF TRINITY_DN94453_c1_g2|g.27864 TRINITY_DN94453_c1_g2_m.27864 type:complete len:402 (+) TRINITY_DN94453_c1_g2:154-1359(+)	1	0.00163079	85.716	FAVGTDAIAK(1)K	2	-1.1701	1
	TRINITY_DN94453_c1_g2_m.27864	136	K	TRINITY_DN94453_c1_g2|g.27864 ORF TRINITY_DN94453_c1_g2|g.27864 TRINITY_DN94453_c1_g2_m.27864 type:complete len:402 (+) TRINITY_DN94453_c1_g2:154-1359(+)	1	6.84062e-29	224.09	EEEKNDPEFAK(1)K	2	-1.4296	3
	TRINITY_DN94453_c1_g2_m.27864	125	K	TRINITY_DN94453_c1_g2|g.27864 ORF TRINITY_DN94453_c1_g2|g.27864 TRINITY_DN94453_c1_g2_m.27864 type:complete len:402 (+) TRINITY_DN94453_c1_g2:154-1359(+)	1	2.60014e-23	185.9	FYK(1)EEEK	2	0.153	3
	TRINITY_DN94453_c1_g2_m.27864	257	K	TRINITY_DN94453_c1_g2|g.27864 ORF TRINITY_DN94453_c1_g2|g.27864 TRINITY_DN94453_c1_g2_m.27864 type:complete len:402 (+) TRINITY_DN94453_c1_g2:154-1359(+)	1	0.000617311	90.142	LGLATALIEK(1)AK	2	0.23608	1
	TRINITY_DN94453_c1_g2_m.27864	74	K	TRINITY_DN94453_c1_g2|g.27864 ORF TRINITY_DN94453_c1_g2|g.27864 TRINITY_DN94453_c1_g2_m.27864 type:complete len:402 (+) TRINITY_DN94453_c1_g2:154-1359(+)	1	1.23581e-07	154.09	GVTPK(1)YSLKPLVPR	2	-2.5855	2
	TRINITY_DN94453_c1_g2_m.27864	261	K	TRINITY_DN94453_c1_g2|g.27864 ORF TRINITY_DN94453_c1_g2|g.27864 TRINITY_DN94453_c1_g2_m.27864 type:complete len:402 (+) TRINITY_DN94453_c1_g2:154-1359(+)	1	9.91072e-16	168.69	LK(1)GVSLLLPTDVVAADK	2	1.9365	1
	TRINITY_DN94453_c1_g2_m.27864	58	K	TRINITY_DN94453_c1_g2|g.27864 ORF TRINITY_DN94453_c1_g2|g.27864 TRINITY_DN94453_c1_g2_m.27864 type:complete len:402 (+) TRINITY_DN94453_c1_g2:154-1359(+)	1	3.28499e-08	112.73	EHGAK(1)VLLCSHLGR	3	0.59314	1
	TRINITY_DN94453_c1_g2_m.27864	202	K	TRINITY_DN94453_c1_g2|g.27864 ORF TRINITY_DN94453_c1_g2|g.27864 TRINITY_DN94453_c1_g2_m.27864 type:complete len:402 (+) TRINITY_DN94453_c1_g2:154-1359(+)	1	0.000228862	89.382	RPFAAIVGGSK(1)VSTK	3	-1.4252	1
	TRINITY_DN94453_c1_g2_m.27864	137	K	TRINITY_DN94453_c1_g2|g.27864 ORF TRINITY_DN94453_c1_g2|g.27864 TRINITY_DN94453_c1_g2_m.27864 type:complete len:402 (+) TRINITY_DN94453_c1_g2:154-1359(+)	1	1.2482e-09	110.06	K(1)LASLADLYVNDAFGTAHR	3	-0.11039	1
	TRINITY_DN94453_c1_g2_m.27864	69	K	TRINITY_DN94453_c1_g2|g.27864 ORF TRINITY_DN94453_c1_g2|g.27864 TRINITY_DN94453_c1_g2_m.27864 type:complete len:402 (+) TRINITY_DN94453_c1_g2:154-1359(+)	1	0.0691245	58.286	PK(1)GVTPK	2	-0.45074	1
	TRINITY_DN94453_c1_g2_m.27864	191	K	TRINITY_DN94453_c1_g2|g.27864 ORF TRINITY_DN94453_c1_g2|g.27864 TRINITY_DN94453_c1_g2_m.27864 type:complete len:402 (+) TRINITY_DN94453_c1_g2:154-1359(+)	1	9.16707e-08	155.57	ELDYLVGAVGNPK(1)R	2	-7.4016	1
	TRINITY_DN94453_c1_g2_m.27864	178	K	TRINITY_DN94453_c1_g2|g.27864 ORF TRINITY_DN94453_c1_g2|g.27864 TRINITY_DN94453_c1_g2_m.27864 type:complete len:402 (+) TRINITY_DN94453_c1_g2:154-1359(+)	1	1.7814e-25	149.62	YLKPAVAGFLMQK(1)ELDYLVGAVGNPK	3	0.93403	1
	TRINITY_DN94475_c0_g1_m.27888	131	K	TRINITY_DN94475_c0_g1|g.27888 ORF TRINITY_DN94475_c0_g1|g.27888 TRINITY_DN94475_c0_g1_m.27888 type:complete len:232 (+) TRINITY_DN94475_c0_g1:962-1657(+)	1	0.00115611	100.75	HK(1)GQYALR	2	1.7363	1
	TRINITY_DN94577_c0_g1_m.27995	3	K	TRINITY_DN94577_c0_g1|g.27995 ORF TRINITY_DN94577_c0_g1|g.27995 TRINITY_DN94577_c0_g1_m.27995 type:complete len:387 (+) TRINITY_DN94577_c0_g1:235-1395(+)	1	0.000237372	71.219	AK(1)PISIEVWNPSGK	2	5.6142	1
	TRINITY_DN94577_c0_g1_m.27995	248	K	TRINITY_DN94577_c0_g1|g.27995 ORF TRINITY_DN94577_c0_g1|g.27995 TRINITY_DN94577_c0_g1_m.27995 type:complete len:387 (+) TRINITY_DN94577_c0_g1:235-1395(+)	1	0.000653015	85.742	EADVISLHPVLDK(1)TTYHLINK	3	-3.2988	1
	TRINITY_DN94577_c0_g1_m.27995	287	K	TRINITY_DN94577_c0_g1|g.27995 ORF TRINITY_DN94577_c0_g1|g.27995 TRINITY_DN94577_c0_g1_m.27995 type:complete len:387 (+) TRINITY_DN94577_c0_g1:235-1395(+)	1	0.000106546	65.212	GPVIDEAALVEHLK(1)LNPMFR	3	-0.75062	1
	TRINITY_DN94593_c2_g2_m.28017	9	K	TRINITY_DN94593_c2_g2|g.28017 ORF TRINITY_DN94593_c2_g2|g.28017 TRINITY_DN94593_c2_g2_m.28017 type:complete len:196 (+) TRINITY_DN94593_c2_g2:309-896(+)	1	0.00032561	113.46	VQK(1)ELVECNR	2	-0.87133	1
	TRINITY_DN94632_c0_g1_m.28069	487	K	TRINITY_DN94632_c0_g1|g.28069 ORF TRINITY_DN94632_c0_g1|g.28069 TRINITY_DN94632_c0_g1_m.28069 type:complete len:580 (+) TRINITY_DN94632_c0_g1:113-1852(+)	1	0.000673628	91.245	MK(1)DTEEHPEGPLR	2	-2.3713	1
	TRINITY_DN94632_c0_g1_m.28069	284	K	TRINITY_DN94632_c0_g1|g.28069 ORF TRINITY_DN94632_c0_g1|g.28069 TRINITY_DN94632_c0_g1_m.28069 type:complete len:580 (+) TRINITY_DN94632_c0_g1:113-1852(+)	1	0.0116886	49.325	FAEEK(1)FQR	2	4.6832	1
	TRINITY_DN94636_c0_g1_m.28074	189	K	TRINITY_DN94636_c0_g1|g.28074 ORF TRINITY_DN94636_c0_g1|g.28074 TRINITY_DN94636_c0_g1_m.28074 type:complete len:521 (+) TRINITY_DN94636_c0_g1:413-1975(+)	1	2.69944e-30	114.35	IMALDLPHGGHLSHGYQTDTK(1)K	3	0.33329	1
	TRINITY_DN94636_c0_g1_m.28074	466	K	TRINITY_DN94636_c0_g1|g.28074 ORF TRINITY_DN94636_c0_g1|g.28074 TRINITY_DN94636_c0_g1_m.28074 type:complete len:521 (+) TRINITY_DN94636_c0_g1:413-1975(+)	1	6.314e-06	153.33	AK(1)AETTAGTK	2	0.23437	1
	TRINITY_DN94636_c0_g1_m.28074	476	K	TRINITY_DN94636_c0_g1|g.28074 ORF TRINITY_DN94636_c0_g1|g.28074 TRINITY_DN94636_c0_g1_m.28074 type:complete len:521 (+) TRINITY_DN94636_c0_g1:413-1975(+)	1	1.8946e-12	183	LK(1)DFIATIQTNDNIK	2	-0.46119	1
	TRINITY_DN94636_c0_g1_m.28074	309	K	TRINITY_DN94636_c0_g1|g.28074 ORF TRINITY_DN94636_c0_g1|g.28074 TRINITY_DN94636_c0_g1_m.28074 type:complete len:521 (+) TRINITY_DN94636_c0_g1:413-1975(+)	1	8.87546e-06	98.895	EINK(1)QGQEVIYDFEEK	2	-1.419	1
	TRINITY_DN94636_c0_g1_m.28074	129	K	TRINITY_DN94636_c0_g1|g.28074 ORF TRINITY_DN94636_c0_g1|g.28074 TRINITY_DN94636_c0_g1_m.28074 type:complete len:521 (+) TRINITY_DN94636_c0_g1:413-1975(+)	1	5.09983e-09	89.359	YYGGNEYIDMAETLCQK(1)R	2	-1.2154	1
	TRINITY_DN94636_c0_g1_m.28074	305	K	TRINITY_DN94636_c0_g1|g.28074 ORF TRINITY_DN94636_c0_g1|g.28074 TRINITY_DN94636_c0_g1_m.28074 type:complete len:521 (+) TRINITY_DN94636_c0_g1:413-1975(+)	1	0.0304368	56.014	GVK(1)EINK	2	0.31825	1
	TRINITY_DN94636_c0_g1_m.28074	394	K	TRINITY_DN94636_c0_g1|g.28074 ORF TRINITY_DN94636_c0_g1|g.28074 TRINITY_DN94636_c0_g1_m.28074 type:complete len:521 (+) TRINITY_DN94636_c0_g1:413-1975(+)	1	1.26644e-05	64.56	GYELVSGGTDNHLVLVNLK(1)SK	3	-1.146	2
	TRINITY_DN94636_c0_g1_m.28074	396	K	TRINITY_DN94636_c0_g1|g.28074 ORF TRINITY_DN94636_c0_g1|g.28074 TRINITY_DN94636_c0_g1_m.28074 type:complete len:521 (+) TRINITY_DN94636_c0_g1:413-1975(+)	1	0.00334239	91.783	SK(1)GIDGSR	2	0.44247	1
	TRINITY_DN94636_c0_g1_m.28074	367	K	TRINITY_DN94636_c0_g1|g.28074 ORF TRINITY_DN94636_c0_g1|g.28074 TRINITY_DN94636_c0_g1_m.28074 type:complete len:521 (+) TRINITY_DN94636_c0_g1:413-1975(+)	1	6.04925e-13	158.59	AYQEQVLSNCAK(1)FAQR	2	-3.5672	1
	TRINITY_DN94636_c0_g1_m.28074	375	K	TRINITY_DN94636_c0_g1|g.28074 ORF TRINITY_DN94636_c0_g1|g.28074 TRINITY_DN94636_c0_g1_m.28074 type:complete len:521 (+) TRINITY_DN94636_c0_g1:413-1975(+)	1	3.79887e-11	117.9	LAEK(1)GYELVSGGTDNHLVLVNLK	3	1.8038	1
	TRINITY_DN94636_c0_g1_m.28074	474	K	TRINITY_DN94636_c0_g1|g.28074 ORF TRINITY_DN94636_c0_g1|g.28074 TRINITY_DN94636_c0_g1_m.28074 type:complete len:521 (+) TRINITY_DN94636_c0_g1:413-1975(+)	1	0.00249898	92.732	AETTAGTK(1)LK	2	1.017	1
	TRINITY_DN94636_c0_g1_m.28074	494	K	TRINITY_DN94636_c0_g1|g.28074 ORF TRINITY_DN94636_c0_g1|g.28074 TRINITY_DN94636_c0_g1_m.28074 type:complete len:521 (+) TRINITY_DN94636_c0_g1:413-1975(+)	1	0.0056035	72.355	TEIAK(1)LR	2	1.6652	1
	TRINITY_DN94636_c0_g1_m.28074	405	K	TRINITY_DN94636_c0_g1|g.28074 ORF TRINITY_DN94636_c0_g1|g.28074 TRINITY_DN94636_c0_g1_m.28074 type:complete len:521 (+) TRINITY_DN94636_c0_g1:413-1975(+)	1	5.72282e-17	149.58	VEK(1)VLELVHIAANK	2	2.3122	2
	TRINITY_DN94636_c0_g1_m.28074	504	K	TRINITY_DN94636_c0_g1|g.28074 ORF TRINITY_DN94636_c0_g1|g.28074 TRINITY_DN94636_c0_g1_m.28074 type:complete len:521 (+) TRINITY_DN94636_c0_g1:413-1975(+)	1	0.000138958	47.27	HEVEDYAK(1)QFPTIGFEK	2	-2.7759	1
	TRINITY_DN94774_c1_g1_m.28226	45	K	TRINITY_DN94774_c1_g1|g.28226 ORF TRINITY_DN94774_c1_g1|g.28226 TRINITY_DN94774_c1_g1_m.28226 type:complete len:262 (+) TRINITY_DN94774_c1_g1:94-879(+)	1	0.0182808	60.892	NIGK(1)TLVSR	2	-2.1916	1
	TRINITY_DN94774_c1_g1_m.28226	62	K	TRINITY_DN94774_c1_g1|g.28226 ORF TRINITY_DN94774_c1_g1|g.28226 TRINITY_DN94774_c1_g1_m.28226 type:complete len:262 (+) TRINITY_DN94774_c1_g1:94-879(+)	1	3.81484e-06	125.5	IASEGLK(1)HR	2	2.3769	1
	TRINITY_DN94774_c1_g1_m.28226	55	K	TRINITY_DN94774_c1_g1|g.28226 ORF TRINITY_DN94774_c1_g1|g.28226 TRINITY_DN94774_c1_g1_m.28226 type:complete len:262 (+) TRINITY_DN94774_c1_g1:94-879(+)	1	7.1781e-05	97.175	TQGTK(1)IASEGLK	2	-0.91253	1
	TRINITY_DN94774_c1_g1_m.28226	195	K	TRINITY_DN94774_c1_g1|g.28226 ORF TRINITY_DN94774_c1_g1|g.28226 TRINITY_DN94774_c1_g1_m.28226 type:complete len:262 (+) TRINITY_DN94774_c1_g1:94-879(+)	1	0.00147182	69.276	FIPEVIGK(1)EIEK	2	-0.70765	1
	TRINITY_DN94774_c1_g1_m.28226	222	K	TRINITY_DN94774_c1_g1|g.28226 ORF TRINITY_DN94774_c1_g1|g.28226 TRINITY_DN94774_c1_g1_m.28226 type:complete len:262 (+) TRINITY_DN94774_c1_g1:94-879(+)	1	0.0618459	40.502	APK(1)FDLGK	2	-0.88958	1
	TRINITY_DN94784_c0_g1_m.28244	154	K	TRINITY_DN94784_c0_g1|g.28244 ORF TRINITY_DN94784_c0_g1|g.28244 TRINITY_DN94784_c0_g1_m.28244 type:complete len:470 (+) TRINITY_DN94784_c0_g1:237-1646(+)	1	0.0479576	49.96	AVNDIHK(1)R	2	0.93553	1
	TRINITY_DN94784_c0_g1_m.28244	68	K	TRINITY_DN94784_c0_g1|g.28244 ORF TRINITY_DN94784_c0_g1|g.28244 TRINITY_DN94784_c0_g1_m.28244 type:complete len:470 (+) TRINITY_DN94784_c0_g1:237-1646(+)	1	0.0155355	48.157	IVVQK(1)TSPR	2	0.50959	1
	TRINITY_DN94784_c0_g1_m.28244	355	K	TRINITY_DN94784_c0_g1|g.28244 ORF TRINITY_DN94784_c0_g1|g.28244 TRINITY_DN94784_c0_g1_m.28244 type:complete len:470 (+) TRINITY_DN94784_c0_g1:237-1646(+)	1	0.0242545	56.378	IK(1)DHFTR	2	1.1995	1
	TRINITY_DN94818_c0_g8_m.28285	87	K	TRINITY_DN94818_c0_g8|g.28285 ORF TRINITY_DN94818_c0_g8|g.28285 TRINITY_DN94818_c0_g8_m.28285 type:5prime_partial len:167 (+) TRINITY_DN94818_c0_g8:2-502(+)	1	0.000213929	112.8	YQK(1)STELLIR	2	-2.1326	1
	TRINITY_DN94818_c0_g8_m.28285	153	K	TRINITY_DN94818_c0_g8|g.28285 ORF TRINITY_DN94818_c0_g8|g.28285 TRINITY_DN94818_c0_g8_m.28285 type:5prime_partial len:167 (+) TRINITY_DN94818_c0_g8:2-502(+)	1	0.000865913	64.906	VTIQSK(1)DIQLAR	2	2.768	1
	TRINITY_DN94819_c0_g1_m.28287	212	K	TRINITY_DN94819_c0_g1|g.28287 ORF TRINITY_DN94819_c0_g1|g.28287 TRINITY_DN94819_c0_g1_m.28287 type:complete len:250 (+) TRINITY_DN94819_c0_g1:138-887(+)	1	1.0096e-24	198.33	NIEVAVMTK(1)EHGLR	2	-1.5452	2
	TRINITY_DN94819_c0_g1_m.28287	53	K	TRINITY_DN94819_c0_g1|g.28287 ORF TRINITY_DN94819_c0_g1|g.28287 TRINITY_DN94819_c0_g1_m.28287 type:complete len:250 (+) TRINITY_DN94819_c0_g1:138-887(+)	1	0.0558331	50.834	ATPK(1)LQDSR	2	0.69816	1
	TRINITY_DN94819_c0_g1_m.28287	179	K	TRINITY_DN94819_c0_g1|g.28287 ORF TRINITY_DN94819_c0_g1|g.28287 TRINITY_DN94819_c0_g1_m.28287 type:complete len:250 (+) TRINITY_DN94819_c0_g1:138-887(+)	1	4.91433e-06	106	NFK(1)ETSGQETVK	2	-1.4228	1
	TRINITY_DN94819_c0_g1_m.28287	188	K	TRINITY_DN94819_c0_g1|g.28287 ORF TRINITY_DN94819_c0_g1|g.28287 TRINITY_DN94819_c0_g1_m.28287 type:complete len:250 (+) TRINITY_DN94819_c0_g1:138-887(+)	1	0.00102716	65.879	ETSGQETVK(1)LAIR	2	1.0459	1
	TRINITY_DN94819_c0_g1_m.28287	176	K	TRINITY_DN94819_c0_g1|g.28287 ORF TRINITY_DN94819_c0_g1|g.28287 TRINITY_DN94819_c0_g1_m.28287 type:complete len:250 (+) TRINITY_DN94819_c0_g1:138-887(+)	1	0.00757982	46.835	EFLEK(1)NFK	2	-1.2629	1
	TRINITY_DN94820_c0_g1_m.28290	130	K	TRINITY_DN94820_c0_g1|g.28290 ORF TRINITY_DN94820_c0_g1|g.28290 TRINITY_DN94820_c0_g1_m.28290 type:complete len:196 (+) TRINITY_DN94820_c0_g1:295-882(+)	1	6.42781e-08	106.47	LALNDALTFDK(1)ATK	2	1.4944	1
	TRINITY_DN94820_c0_g1_m.28290	166	K	TRINITY_DN94820_c0_g1|g.28290 ORF TRINITY_DN94820_c0_g1|g.28290 TRINITY_DN94820_c0_g1_m.28290 type:complete len:196 (+) TRINITY_DN94820_c0_g1:295-882(+)	1	5.58487e-06	110.88	AK(1)EEIDSHSK	2	0.15276	1
	TRINITY_DN94820_c0_g1_m.28290	100	K	TRINITY_DN94820_c0_g1|g.28290 ORF TRINITY_DN94820_c0_g1|g.28290 TRINITY_DN94820_c0_g1_m.28290 type:complete len:196 (+) TRINITY_DN94820_c0_g1:295-882(+)	1	0.00417585	47.915	SEFQANIK(1)ETLFDAIK	2	3.876	1
	TRINITY_DN94923_c0_g1_m.28402	65	K	TRINITY_DN94923_c0_g1|g.28402 ORF TRINITY_DN94923_c0_g1|g.28402 TRINITY_DN94923_c0_g1_m.28402 type:complete len:356 (+) TRINITY_DN94923_c0_g1:253-1320(+)	1	0.00866722	75.474	GYLLSK(1)AESVNR	2	1.8619	1
	TRINITY_DN94951_c0_g1_m.28431	159	K	TRINITY_DN94951_c0_g1|g.28431 ORF TRINITY_DN94951_c0_g1|g.28431 TRINITY_DN94951_c0_g1_m.28431 type:complete len:584 (+) TRINITY_DN94951_c0_g1:211-1962(+)	1	0.00180904	99.305	IYANTK(1)TIK	2	-1.6787	1
	TRINITY_DN94951_c0_g1_m.28431	571	K	TRINITY_DN94951_c0_g1|g.28431 ORF TRINITY_DN94951_c0_g1|g.28431 TRINITY_DN94951_c0_g1_m.28431 type:complete len:584 (+) TRINITY_DN94951_c0_g1:211-1962(+)	1	0.0235891	78.178	MK(1)EFTGR	2	1.2908	2
	TRINITY_DN94951_c0_g1_m.28431	259	K	TRINITY_DN94951_c0_g1|g.28431 ORF TRINITY_DN94951_c0_g1|g.28431 TRINITY_DN94951_c0_g1_m.28431 type:complete len:584 (+) TRINITY_DN94951_c0_g1:211-1962(+)	1	1.54385e-06	69.94	ESSLLNCTPK(1)EDFGGGHPDPNLTYAK	3	2.2774	1
	TRINITY_DN94951_c0_g1_m.28431	69	K	TRINITY_DN94951_c0_g1|g.28431 ORF TRINITY_DN94951_c0_g1|g.28431 TRINITY_DN94951_c0_g1_m.28431 type:complete len:584 (+) TRINITY_DN94951_c0_g1:211-1962(+)	1	0.00894628	50.297	YFSK(1)DAIQIIIK	2	0.90164	1
	TRINITY_DN94951_c0_g1_m.28431	544	K	TRINITY_DN94951_c0_g1|g.28431 ORF TRINITY_DN94951_c0_g1|g.28431 TRINITY_DN94951_c0_g1_m.28431 type:complete len:584 (+) TRINITY_DN94951_c0_g1:211-1962(+)	1	1.09095e-05	92.707	LYIEQYVK(1)DSSK	2	-0.89422	1
	TRINITY_DN94951_c0_g1_m.28431	275	K	TRINITY_DN94951_c0_g1|g.28431 ORF TRINITY_DN94951_c0_g1|g.28431 TRINITY_DN94951_c0_g1_m.28431 type:complete len:584 (+) TRINITY_DN94951_c0_g1:211-1962(+)	1	8.16789e-07	66.913	EDFGGGHPDPNLTYAK(1)ELVLR	3	0.9973	1
	TRINITY_DN94951_c0_g1_m.28431	507	K	TRINITY_DN94951_c0_g1|g.28431 ORF TRINITY_DN94951_c0_g1|g.28431 TRINITY_DN94951_c0_g1_m.28431 type:complete len:584 (+) TRINITY_DN94951_c0_g1:211-1962(+)	0.997072	8.21865e-10	66.582	LDVSDVVDADEFEYK(0.003)DPVDGSVSK(0.997)HQGIR	4	2.5194	2
	TRINITY_DN94951_c0_g1_m.28431	311	K	TRINITY_DN94951_c0_g1|g.28431 ORF TRINITY_DN94951_c0_g1|g.28431 TRINITY_DN94951_c0_g1_m.28431 type:complete len:584 (+) TRINITY_DN94951_c0_g1:211-1962(+)	1	0.0372968	51.456	NMILGK(1)R	2	0.064538	1
	TRINITY_DN94951_c0_g1_m.28431	54	K	TRINITY_DN94951_c0_g1|g.28431 ORF TRINITY_DN94951_c0_g1|g.28431 TRINITY_DN94951_c0_g1_m.28431 type:complete len:584 (+) TRINITY_DN94951_c0_g1:211-1962(+)	1	1.1546e-07	108.24	VK(1)GATLVVSGDGR	2	-1.359	1
	TRINITY_DN94985_c0_g1_m.28471	99	K	TRINITY_DN94985_c0_g1|g.28471 ORF TRINITY_DN94985_c0_g1|g.28471 TRINITY_DN94985_c0_g1_m.28471 type:complete len:267 (+) TRINITY_DN94985_c0_g1:188-988(+)	1	1.45801e-13	97.084	LEEDASPEDLENIGK(1)IK	2	-0.98046	1
	TRINITY_DN95043_c2_g1_m.28543	170	K	TRINITY_DN95043_c2_g1|g.28543 ORF TRINITY_DN95043_c2_g1|g.28543 TRINITY_DN95043_c2_g1_m.28543 type:complete len:593 (+) TRINITY_DN95043_c2_g1:389-2167(+)	1	0.0618459	48.157	GK(1)ILEVLK	2	-0.84147	1
	TRINITY_DN95043_c2_g1_m.28543	391	K	TRINITY_DN95043_c2_g1|g.28543 ORF TRINITY_DN95043_c2_g1|g.28543 TRINITY_DN95043_c2_g1_m.28543 type:complete len:593 (+) TRINITY_DN95043_c2_g1:389-2167(+)	1	0.000920033	98.009	ESLQHFK(1)K	2	-1.8979	1
	TRINITY_DN95043_c2_g1_m.28543	271	K	TRINITY_DN95043_c2_g1|g.28543 ORF TRINITY_DN95043_c2_g1|g.28543 TRINITY_DN95043_c2_g1_m.28543 type:complete len:593 (+) TRINITY_DN95043_c2_g1:389-2167(+)	1	0.000119098	112.8	AVK(1)QNYGEK	2	1.5763	1
	TRINITY_DN95043_c2_g1_m.28543	369	K	TRINITY_DN95043_c2_g1|g.28543 ORF TRINITY_DN95043_c2_g1|g.28543 TRINITY_DN95043_c2_g1_m.28543 type:complete len:593 (+) TRINITY_DN95043_c2_g1:389-2167(+)	1	0.0205973	62.969	K(1)IWLVDSK	2	-2.4412	1
	TRINITY_DN95043_c2_g1_m.28543	71	K	TRINITY_DN95043_c2_g1|g.28543 ORF TRINITY_DN95043_c2_g1|g.28543 TRINITY_DN95043_c2_g1_m.28543 type:complete len:593 (+) TRINITY_DN95043_c2_g1:389-2167(+)	1	0.00255397	62.969	GLAFTEK(1)ER	2	1.5416	1
	TRINITY_DN95043_c2_g1_m.28543	64	K	TRINITY_DN95043_c2_g1|g.28543 ORF TRINITY_DN95043_c2_g1|g.28543 TRINITY_DN95043_c2_g1_m.28543 type:complete len:593 (+) TRINITY_DN95043_c2_g1:389-2167(+)	1	3.13217e-12	154.09	DPHHNK(1)GLAFTEK	2	-2.3974	2
	TRINITY_DN95043_c2_g1_m.28543	428	K	TRINITY_DN95043_c2_g1|g.28543 ORF TRINITY_DN95043_c2_g1|g.28543 TRINITY_DN95043_c2_g1_m.28543 type:complete len:593 (+) TRINITY_DN95043_c2_g1:389-2167(+)	1	4.09173e-26	176.58	TFTK(1)EVVQTLASFNER	2	1.344	1
	TRINITY_DN95043_c2_g1_m.28543	424	K	TRINITY_DN95043_c2_g1|g.28543 ORF TRINITY_DN95043_c2_g1|g.28543 TRINITY_DN95043_c2_g1_m.28543 type:complete len:593 (+) TRINITY_DN95043_c2_g1:389-2167(+)	1	6.36572e-20	135.89	PTILVGSSGAGK(1)TFTK	2	-4.6654	4
	TRINITY_DN95043_c2_g1_m.28543	543	K	TRINITY_DN95043_c2_g1|g.28543 ORF TRINITY_DN95043_c2_g1|g.28543 TRINITY_DN95043_c2_g1_m.28543 type:complete len:593 (+) TRINITY_DN95043_c2_g1:389-2167(+)	1	0.0165125	50.834	GLIYPPFK(1)SIR	2	1.0999	1
	TRINITY_DN95043_c2_g1_m.28543	176	K	TRINITY_DN95043_c2_g1|g.28543 ORF TRINITY_DN95043_c2_g1|g.28543 TRINITY_DN95043_c2_g1_m.28543 type:complete len:593 (+) TRINITY_DN95043_c2_g1:389-2167(+)	1	1.07012e-22	183.27	ILEVLK(1)NWPQR	2	-0.10356	1
	TRINITY_DN95043_c2_g1_m.28543	392	K	TRINITY_DN95043_c2_g1|g.28543 ORF TRINITY_DN95043_c2_g1|g.28543 TRINITY_DN95043_c2_g1_m.28543 type:complete len:593 (+) TRINITY_DN95043_c2_g1:389-2167(+)	1	0.00109259	82.822	K(1)PWAHEHEPVGNLLDAVK	3	2.4725	1
	TRINITY_DN95043_c2_g1_m.28543	376	K	TRINITY_DN95043_c2_g1|g.28543 ORF TRINITY_DN95043_c2_g1|g.28543 TRINITY_DN95043_c2_g1_m.28543 type:complete len:593 (+) TRINITY_DN95043_c2_g1:389-2167(+)	1	2.13691e-05	133.49	IWLVDSK(1)GLIVSAR	2	2.2395	1
	TRINITY_DN95043_c2_g1_m.28543	409	K	TRINITY_DN95043_c2_g1|g.28543 ORF TRINITY_DN95043_c2_g1|g.28543 TRINITY_DN95043_c2_g1_m.28543 type:complete len:593 (+) TRINITY_DN95043_c2_g1:389-2167(+)	0.999997	2.45429e-05	56.436	KPWAHEHEPVGNLLDAVK(1)AIK	3	-1.0755	1
	TRINITY_DN95054_c0_g1_m.28561	161	K	TRINITY_DN95054_c0_g1|g.28561 ORF TRINITY_DN95054_c0_g1|g.28561 TRINITY_DN95054_c0_g1_m.28561 type:complete len:310 (+) TRINITY_DN95054_c0_g1:222-1151(+)	1	0.00544769	43.306	FPK(1)PYDNEQAAR	2	-1.4353	1
	TRINITY_DN95054_c0_g1_m.28561	154	K	TRINITY_DN95054_c0_g1|g.28561 ORF TRINITY_DN95054_c0_g1|g.28561 TRINITY_DN95054_c0_g1_m.28561 type:complete len:310 (+) TRINITY_DN95054_c0_g1:222-1151(+)	1	0.00499654	93.561	PGK(1)LSDR	2	2.0221	1
	TRINITY_DN95069_c0_g1_m.28582	251	K	TRINITY_DN95069_c0_g1|g.28582 ORF TRINITY_DN95069_c0_g1|g.28582 TRINITY_DN95069_c0_g1_m.28582 type:complete len:796 (+) TRINITY_DN95069_c0_g1:170-2557(+)	1	0.0191679	47.561	HPRPPK(1)PISPR	3	0.26586	1
	TRINITY_DN95069_c0_g1_m.28582	662	K	TRINITY_DN95069_c0_g1|g.28582 ORF TRINITY_DN95069_c0_g1|g.28582 TRINITY_DN95069_c0_g1_m.28582 type:complete len:796 (+) TRINITY_DN95069_c0_g1:170-2557(+)	1	6.93539e-10	117.8	FSFLASAK(1)QIVSSASDLDK	2	5.612	1
	TRINITY_DN95069_c0_g1_m.28582	381	K	TRINITY_DN95069_c0_g1|g.28582 ORF TRINITY_DN95069_c0_g1|g.28582 TRINITY_DN95069_c0_g1_m.28582 type:complete len:796 (+) TRINITY_DN95069_c0_g1:170-2557(+)	1	0.00435704	50.297	GYHK(1)LWDSR	2	1.4452	1
	TRINITY_DN95077_c0_g2_m.28591	69	K	TRINITY_DN95077_c0_g2|g.28591 ORF TRINITY_DN95077_c0_g2|g.28591 TRINITY_DN95077_c0_g2_m.28591 type:complete len:165 (+) TRINITY_DN95077_c0_g2:104-598(+)	1	0.0342204	58.687	VWNVTK(1)R	2	-1.4927	1
	TRINITY_DN95077_c0_g2_m.28591	35	K	TRINITY_DN95077_c0_g2|g.28591 ORF TRINITY_DN95077_c0_g2|g.28591 TRINITY_DN95077_c0_g2_m.28591 type:complete len:165 (+) TRINITY_DN95077_c0_g2:104-598(+)	1	0.0544697	47.361	TYK(1)IGEYVDVK	2	2.5307	1
	TRINITY_DN95077_c0_g2_m.28591	50	K	TRINITY_DN95077_c0_g2|g.28591 ORF TRINITY_DN95077_c0_g2|g.28591 TRINITY_DN95077_c0_g2_m.28591 type:complete len:165 (+) TRINITY_DN95077_c0_g2:104-598(+)	1	0.00101684	65.933	VNAAIHK(1)GMPHK	2	-0.69359	1
	TRINITY_DN95077_c0_g2_m.28591	129	K	TRINITY_DN95077_c0_g2|g.28591 ORF TRINITY_DN95077_c0_g2|g.28591 TRINITY_DN95077_c0_g2_m.28591 type:complete len:165 (+) TRINITY_DN95077_c0_g2:104-598(+)	1	0.0233919	42.835	GEIISTK(1)R	2	-0.80304	1
	TRINITY_DN95077_c0_g2_m.28591	55	K	TRINITY_DN95077_c0_g2|g.28591 ORF TRINITY_DN95077_c0_g2|g.28591 TRINITY_DN95077_c0_g2_m.28591 type:complete len:165 (+) TRINITY_DN95077_c0_g2:104-598(+)	1	0.0113185	43.734	GMPHK(1)FYHGR	2	-1.7675	1
	TRINITY_DN95087_c0_g1_m.28611	83	K	TRINITY_DN95087_c0_g1|g.28611 ORF TRINITY_DN95087_c0_g1|g.28611 TRINITY_DN95087_c0_g1_m.28611 type:complete len:207 (+) TRINITY_DN95087_c0_g1:90-710(+)	1	0.0196815	60.709	APAK(1)ILWR	2	-4.3221	1
	TRINITY_DN95087_c0_g1_m.28611	9	K	TRINITY_DN95087_c0_g1|g.28611 ORF TRINITY_DN95087_c0_g1|g.28611 TRINITY_DN95087_c0_g1_m.28611 type:complete len:207 (+) TRINITY_DN95087_c0_g1:90-710(+)	1	0.00340436	60.892	VSGSAISK(1)R	2	0.88275	1
	TRINITY_DN95236_c2_g1_m.28822	284	K	TRINITY_DN95236_c2_g1|g.28822 ORF TRINITY_DN95236_c2_g1|g.28822 TRINITY_DN95236_c2_g1_m.28822 type:complete len:332 (+) TRINITY_DN95236_c2_g1:489-1484(+)	1	0.0499558	47.334	LGPK(1)AEAVEK	2	-0.20412	1
	TRINITY_DN95236_c2_g1_m.28822	236	K	TRINITY_DN95236_c2_g1|g.28822 ORF TRINITY_DN95236_c2_g1|g.28822 TRINITY_DN95236_c2_g1_m.28822 type:complete len:332 (+) TRINITY_DN95236_c2_g1:489-1484(+)	1	1.55048e-05	100.84	EEEYIEWFK(1)K	2	-1.5727	1
	TRINITY_DN95251_c0_g1_m.28842	6	K	TRINITY_DN95251_c0_g1|g.28842 ORF TRINITY_DN95251_c0_g1|g.28842 TRINITY_DN95251_c0_g1_m.28842 type:5prime_partial len:163 (+) TRINITY_DN95251_c0_g1:3-491(+)	1	0.000150792	47.27	IAK(1)AMGHHVTVISSSDR	3	0.2343	1
	TRINITY_DN95272_c0_g1_m.28883	189	K	TRINITY_DN95272_c0_g1|g.28883 ORF TRINITY_DN95272_c0_g1|g.28883 TRINITY_DN95272_c0_g1_m.28883 type:complete len:435 (+) TRINITY_DN95272_c0_g1:33-1337(+)	1	0.000447797	54.309	LTSDDDFFSDPTVK(1)GYYK	2	0.48887	1
	TRINITY_DN95350_c0_g1_m.28990	196	K	TRINITY_DN95350_c0_g1|g.28990 ORF TRINITY_DN95350_c0_g1|g.28990 TRINITY_DN95350_c0_g1_m.28990 type:complete len:704 (+) TRINITY_DN95350_c0_g1:98-2209(+)	1	0.0204611	79.059	TEYISTQK(1)R	2	0.74122	1
	TRINITY_DN95351_c0_g1_m.28994	28	K	TRINITY_DN95351_c0_g1|g.28994 ORF TRINITY_DN95351_c0_g1|g.28994 TRINITY_DN95351_c0_g1_m.28994 type:complete len:253 (+) TRINITY_DN95351_c0_g1:248-1006(+)	1	4.26716e-05	91.245	AITPK(1)MLEFMQDLR	2	5.027	1
	TRINITY_DN95351_c0_g1_m.28994	150	K	TRINITY_DN95351_c0_g1|g.28994 ORF TRINITY_DN95351_c0_g1|g.28994 TRINITY_DN95351_c0_g1_m.28994 type:complete len:253 (+) TRINITY_DN95351_c0_g1:248-1006(+)	1	9.94321e-05	118.06	YDK(1)VHNIR	2	-0.44409	1
	TRINITY_DN95358_c0_g1_m.29001	159	K	TRINITY_DN95358_c0_g1|g.29001 ORF TRINITY_DN95358_c0_g1|g.29001 TRINITY_DN95358_c0_g1_m.29001 type:complete len:309 (+) TRINITY_DN95358_c0_g1:52-978(+)	1	2.98519e-15	207.41	VPSLEHNNEVK(1)GESLDLLK	2	-3.0546	2
	TRINITY_DN95358_c0_g1_m.29001	283	K	TRINITY_DN95358_c0_g1|g.29001 ORF TRINITY_DN95358_c0_g1|g.29001 TRINITY_DN95358_c0_g1_m.29001 type:complete len:309 (+) TRINITY_DN95358_c0_g1:52-978(+)	1	1.23782e-09	114.5	LALWIEELNK(1)IDAYSHTR	3	-1.2581	1
	TRINITY_DN95358_c0_g1_m.29001	142	K	TRINITY_DN95358_c0_g1|g.29001 ORF TRINITY_DN95358_c0_g1|g.29001 TRINITY_DN95358_c0_g1_m.29001 type:complete len:309 (+) TRINITY_DN95358_c0_g1:52-978(+)	1	5.23233e-10	185.47	EK(1)VYSVNK	2	0.44576	1
	TRINITY_DN95358_c0_g1_m.29001	210	K	TRINITY_DN95358_c0_g1|g.29001 ORF TRINITY_DN95358_c0_g1|g.29001 TRINITY_DN95358_c0_g1_m.29001 type:complete len:309 (+) TRINITY_DN95358_c0_g1:52-978(+)	1	4.29501e-09	97.268	DLPAK(1)GGVSEEVDAAFNK	2	-2.1533	1
	TRINITY_DN95358_c0_g1_m.29001	273	K	TRINITY_DN95358_c0_g1|g.29001 ORF TRINITY_DN95358_c0_g1|g.29001 TRINITY_DN95358_c0_g1_m.29001 type:complete len:309 (+) TRINITY_DN95358_c0_g1:52-978(+)	1	2.49619e-10	145.95	PK(1)LALWIEELNK	2	-0.49325	3
	TRINITY_DN95358_c0_g1_m.29001	269	K	TRINITY_DN95358_c0_g1|g.29001 ORF TRINITY_DN95358_c0_g1|g.29001 TRINITY_DN95358_c0_g1_m.29001 type:complete len:309 (+) TRINITY_DN95358_c0_g1:52-978(+)	1	0.0159427	60.589	NYDITK(1)GR	2	0.23128	1
	TRINITY_DN95358_c0_g1_m.29001	119	K	TRINITY_DN95358_c0_g1|g.29001 ORF TRINITY_DN95358_c0_g1|g.29001 TRINITY_DN95358_c0_g1_m.29001 type:complete len:309 (+) TRINITY_DN95358_c0_g1:52-978(+)	1	0.00294987	94.806	NYK(1)GLQDK	2	1.9678	1
	TRINITY_DN95358_c0_g1_m.29001	302	K	TRINITY_DN95358_c0_g1|g.29001 ORF TRINITY_DN95358_c0_g1|g.29001 TRINITY_DN95358_c0_g1_m.29001 type:complete len:309 (+) TRINITY_DN95358_c0_g1:52-978(+)	1	7.62783e-16	184.27	INPQELIATTK(1)K	2	2.861	1
	TRINITY_DN95358_c0_g1_m.29001	148	K	TRINITY_DN95358_c0_g1|g.29001 ORF TRINITY_DN95358_c0_g1|g.29001 TRINITY_DN95358_c0_g1_m.29001 type:complete len:309 (+) TRINITY_DN95358_c0_g1:52-978(+)	1	0.00558395	66.485	VYSVNK(1)VPSLEHNNEVK	2	-3.7816	1
	TRINITY_DN95358_c0_g1_m.29001	140	K	TRINITY_DN95358_c0_g1|g.29001 ORF TRINITY_DN95358_c0_g1|g.29001 TRINITY_DN95358_c0_g1_m.29001 type:complete len:309 (+) TRINITY_DN95358_c0_g1:52-978(+)	1	0.0527205	51.43	PAWYK(1)EK	2	0.56418	1
	TRINITY_DN95358_c0_g1_m.29001	223	K	TRINITY_DN95358_c0_g1|g.29001 ORF TRINITY_DN95358_c0_g1|g.29001 TRINITY_DN95358_c0_g1_m.29001 type:complete len:309 (+) TRINITY_DN95358_c0_g1:52-978(+)	1	2.67026e-29	194.55	GGVSEEVDAAFNK(1)IEEHLSK	3	2.2385	1
	TRINITY_DN95369_c0_g1_m.29026	403	K	TRINITY_DN95369_c0_g1|g.29026 ORF TRINITY_DN95369_c0_g1|g.29026 TRINITY_DN95369_c0_g1_m.29026 type:complete len:577 (+) TRINITY_DN95369_c0_g1:214-1944(+)	0.96856	0.000316407	129.28	K(0.031)K(0.969)EEGNALFK	2	-0.17312	1
	TRINITY_DN95369_c0_g1_m.29026	228	K	TRINITY_DN95369_c0_g1|g.29026 ORF TRINITY_DN95369_c0_g1|g.29026 TRINITY_DN95369_c0_g1_m.29026 type:complete len:577 (+) TRINITY_DN95369_c0_g1:214-1944(+)	1	0.000149812	86.243	VLLTVK(1)PQYGFGEK	2	0.72695	1
	TRINITY_DN95369_c0_g1_m.29026	280	K	TRINITY_DN95369_c0_g1|g.29026 ORF TRINITY_DN95369_c0_g1|g.29026 TRINITY_DN95369_c0_g1_m.29026 type:complete len:577 (+) TRINITY_DN95369_c0_g1:214-1944(+)	1	0.000791828	77.325	ILK(1)EGTGYEKPNDGAVVK	2	-2.1542	1
	TRINITY_DN95369_c0_g1_m.29026	310	K	TRINITY_DN95369_c0_g1|g.29026 ORF TRINITY_DN95369_c0_g1|g.29026 TRINITY_DN95369_c0_g1_m.29026 type:complete len:577 (+) TRINITY_DN95369_c0_g1:214-1944(+)	1	0.0360222	55.235	LQDGTVFSK(1)K	2	-1.7585	1
	TRINITY_DN95369_c0_g1_m.29026	385	K	TRINITY_DN95369_c0_g1|g.29026 ORF TRINITY_DN95369_c0_g1|g.29026 TRINITY_DN95369_c0_g1_m.29026 type:complete len:577 (+) TRINITY_DN95369_c0_g1:214-1944(+)	1	7.32451e-11	165.09	DK(1)ESWDMNNAEK	2	0.85335	1
	TRINITY_DN95369_c0_g1_m.29026	458	K	TRINITY_DN95369_c0_g1|g.29026 ORF TRINITY_DN95369_c0_g1|g.29026 TRINITY_DN95369_c0_g1_m.29026 type:complete len:577 (+) TRINITY_DN95369_c0_g1:214-1944(+)	1	0.000952655	87.942	VTCNLNNAACK(1)LK	2	-0.503	1
	TRINITY_DN95369_c0_g1_m.29026	236	K	TRINITY_DN95369_c0_g1|g.29026 ORF TRINITY_DN95369_c0_g1|g.29026 TRINITY_DN95369_c0_g1_m.29026 type:complete len:577 (+) TRINITY_DN95369_c0_g1:214-1944(+)	0.999393	0.00165676	54.309	VLLTVK(0.001)PQYGFGEK(0.999)GR	2	-3.7362	1
	TRINITY_DN95369_c0_g1_m.29026	42	K	TRINITY_DN95369_c0_g1|g.29026 ORF TRINITY_DN95369_c0_g1|g.29026 TRINITY_DN95369_c0_g1_m.29026 type:complete len:577 (+) TRINITY_DN95369_c0_g1:214-1944(+)	1	0.0122467	58.286	EIGNQGLK(1)K	2	-1.5413	1
	TRINITY_DN95369_c0_g1_m.29026	427	K	TRINITY_DN95369_c0_g1|g.29026 ORF TRINITY_DN95369_c0_g1|g.29026 TRINITY_DN95369_c0_g1_m.29026 type:complete len:577 (+) TRINITY_DN95369_c0_g1:214-1944(+)	1	2.5247e-05	65.212	GAK(1)LIEYDSSFSEEEKK	2	-1.76	1
	TRINITY_DN95369_c0_g1_m.29026	172	K	TRINITY_DN95369_c0_g1|g.29026 ORF TRINITY_DN95369_c0_g1|g.29026 TRINITY_DN95369_c0_g1_m.29026 type:complete len:577 (+) TRINITY_DN95369_c0_g1:214-1944(+)	1	0.0116311	59.731	WENPK(1)DLDEVLVK	2	2.23	1
	TRINITY_DN95369_c0_g1_m.29026	34	K	TRINITY_DN95369_c0_g1|g.29026 ORF TRINITY_DN95369_c0_g1|g.29026 TRINITY_DN95369_c0_g1_m.29026 type:complete len:577 (+) TRINITY_DN95369_c0_g1:214-1944(+)	1	2.7764e-32	212.27	VGEEK(1)EIGNQGLK	2	-0.75266	1
	TRINITY_DN95369_c0_g1_m.29026	483	K	TRINITY_DN95369_c0_g1|g.29026 ORF TRINITY_DN95369_c0_g1|g.29026 TRINITY_DN95369_c0_g1_m.29026 type:complete len:577 (+) TRINITY_DN95369_c0_g1:214-1944(+)	1	9.6356e-12	128.97	VLEAENTNVK(1)ALYR	2	-0.43074	1
	TRINITY_DN95369_c0_g1_m.29026	88	K	TRINITY_DN95369_c0_g1|g.29026 ORF TRINITY_DN95369_c0_g1|g.29026 TRINITY_DN95369_c0_g1_m.29026 type:complete len:577 (+) TRINITY_DN95369_c0_g1:214-1944(+)	1	4.17924e-08	112.7	GTPFTFK(1)LGQGQVIK	2	1.6911	1
	TRINITY_DN95369_c0_g1_m.29026	96	K	TRINITY_DN95369_c0_g1|g.29026 ORF TRINITY_DN95369_c0_g1|g.29026 TRINITY_DN95369_c0_g1_m.29026 type:complete len:577 (+) TRINITY_DN95369_c0_g1:214-1944(+)	1	1.30044e-05	110.58	LGQGQVIK(1)GWDQGIK	2	-2.322	1
	TRINITY_DN95369_c0_g1_m.29026	473	K	TRINITY_DN95369_c0_g1|g.29026 ORF TRINITY_DN95369_c0_g1|g.29026 TRINITY_DN95369_c0_g1_m.29026 type:complete len:577 (+) TRINITY_DN95369_c0_g1:214-1944(+)	1	5.10122e-17	161.23	LCTK(1)VLEAENTNVK	2	-0.89979	1
	TRINITY_DN95369_c0_g1_m.29026	301	K	TRINITY_DN95369_c0_g1|g.29026 ORF TRINITY_DN95369_c0_g1|g.29026 TRINITY_DN95369_c0_g1_m.29026 type:complete len:577 (+) TRINITY_DN95369_c0_g1:214-1944(+)	1	3.52964e-31	199.51	FTGK(1)LQDGTVFSK	2	6.5331	1
	TRINITY_DN95379_c0_g1_m.29038	8	K	TRINITY_DN95379_c0_g1|g.29038 ORF TRINITY_DN95379_c0_g1|g.29038 TRINITY_DN95379_c0_g1_m.29038 type:complete len:271 (+) TRINITY_DN95379_c0_g1:218-1030(+)	1	1.90569e-05	103.69	AASGDVK(1)SINELR	2	-1.0153	1
	TRINITY_DN95399_c0_g1_m.29072	123	K	TRINITY_DN95399_c0_g1|g.29072 ORF TRINITY_DN95399_c0_g1|g.29072 TRINITY_DN95399_c0_g1_m.29072 type:complete len:259 (+) TRINITY_DN95399_c0_g1:75-851(+)	0.79408	0.0504376	58.889	TIESK(0.794)K(0.206)PIVVK	2	-2.5168	1
	TRINITY_DN95399_c0_g1_m.29072	118	K	TRINITY_DN95399_c0_g1|g.29072 ORF TRINITY_DN95399_c0_g1|g.29072 TRINITY_DN95399_c0_g1_m.29072 type:complete len:259 (+) TRINITY_DN95399_c0_g1:75-851(+)	1	8.26848e-08	115.05	AQAETEGK(1)TIESK	2	-1.9896	1
	TRINITY_DN95411_c1_g2_m.29092	324	K	TRINITY_DN95411_c1_g2|g.29092 ORF TRINITY_DN95411_c1_g2|g.29092 TRINITY_DN95411_c1_g2_m.29092 type:complete len:595 (+) TRINITY_DN95411_c1_g2:81-1865(+)	1	0.00422347	51.569	AK(1)EDVRPIFWANRPK	3	-1.4545	1
	TRINITY_DN95446_c0_g1_m.29156	278	K	TRINITY_DN95446_c0_g1|g.29156 ORF TRINITY_DN95446_c0_g1|g.29156 TRINITY_DN95446_c0_g1_m.29156 type:complete len:357 (+) TRINITY_DN95446_c0_g1:180-1250(+)	1	1.54199e-09	99.909	HAVGVVRPVSVAFEVVK(1)GFR	3	1.8042	2
	TRINITY_DN95456_c0_g1_m.29175	238	K	TRINITY_DN95456_c0_g1|g.29175 ORF TRINITY_DN95456_c0_g1|g.29175 TRINITY_DN95456_c0_g1_m.29175 type:complete len:407 (+) TRINITY_DN95456_c0_g1:277-1497(+)	1	0.0154759	67.881	VLDQK(1)FGIIK	2	-3.9256	1
	TRINITY_DN95456_c0_g1_m.29175	142	K	TRINITY_DN95456_c0_g1|g.29175 ORF TRINITY_DN95456_c0_g1|g.29175 TRINITY_DN95456_c0_g1_m.29175 type:complete len:407 (+) TRINITY_DN95456_c0_g1:277-1497(+)	1	1.30109e-05	119.43	AISVDGK(1)IIQVVTDR	2	-0.31882	1
	TRINITY_DN95456_c0_g1_m.29175	295	K	TRINITY_DN95456_c0_g1|g.29175 ORF TRINITY_DN95456_c0_g1|g.29175 TRINITY_DN95456_c0_g1_m.29175 type:complete len:407 (+) TRINITY_DN95456_c0_g1:277-1497(+)	1	0.00168076	59.645	AVALVLPTLK(1)GK	2	1.6215	1
	TRINITY_DN95456_c0_g1_m.29175	180	K	TRINITY_DN95456_c0_g1|g.29175 ORF TRINITY_DN95456_c0_g1|g.29175 TRINITY_DN95456_c0_g1_m.29175 type:complete len:407 (+) TRINITY_DN95456_c0_g1:277-1497(+)	1	3.50902e-07	99.174	EGAGK(1)HIQAGAK	2	0.071458	1
	TRINITY_DN95456_c0_g1_m.29175	321	K	TRINITY_DN95456_c0_g1|g.29175 ORF TRINITY_DN95456_c0_g1|g.29175 TRINITY_DN95456_c0_g1_m.29175 type:complete len:407 (+) TRINITY_DN95456_c0_g1:277-1497(+)	1	0.00499474	47.27	VPTPNVSVVDLVVQVSK(1)K	3	2.0183	1
	TRINITY_DN95456_c0_g1_m.29175	73	K	TRINITY_DN95456_c0_g1|g.29175 ORF TRINITY_DN95456_c0_g1|g.29175 TRINITY_DN95456_c0_g1_m.29175 type:complete len:407 (+) TRINITY_DN95456_c0_g1:277-1497(+)	1	0.0140222	42.075	LK(1)VAINGFGR	2	-2.9434	1
	TRINITY_DN95456_c0_g1_m.29175	338	K	TRINITY_DN95456_c0_g1|g.29175 ORF TRINITY_DN95456_c0_g1|g.29175 TRINITY_DN95456_c0_g1_m.29175 type:complete len:407 (+) TRINITY_DN95456_c0_g1:277-1497(+)	1	0.0159823	51.864	DSAEK(1)ELK	2	1.2503	1
	TRINITY_DN95456_c0_g1_m.29175	117	K	TRINITY_DN95456_c0_g1|g.29175 ORF TRINITY_DN95456_c0_g1|g.29175 TRINITY_DN95456_c0_g1_m.29175 type:complete len:407 (+) TRINITY_DN95456_c0_g1:277-1497(+)	1	0.000642707	91.1	QASHLLK(1)YDSTLGIFDADVK	3	1.0249	1
	TRINITY_DN95456_c0_g1_m.29175	285	K	TRINITY_DN95456_c0_g1|g.29175 ORF TRINITY_DN95456_c0_g1|g.29175 TRINITY_DN95456_c0_g1_m.29175 type:complete len:407 (+) TRINITY_DN95456_c0_g1:277-1497(+)	1	4.66583e-06	107.43	AAALNIVPTSTGAAK(1)AVALVLPTLK	3	3.0249	1
	TRINITY_DN95456_c0_g1_m.29175	187	K	TRINITY_DN95456_c0_g1|g.29175 ORF TRINITY_DN95456_c0_g1|g.29175 TRINITY_DN95456_c0_g1_m.29175 type:complete len:407 (+) TRINITY_DN95456_c0_g1:277-1497(+)	1	0.00116284	97.033	HIQAGAK(1)K	2	3.3734	1
	TRINITY_DN95456_c0_g1_m.29175	110	K	TRINITY_DN95456_c0_g1|g.29175 ORF TRINITY_DN95456_c0_g1|g.29175 TRINITY_DN95456_c0_g1_m.29175 type:complete len:407 (+) TRINITY_DN95456_c0_g1:277-1497(+)	1	3.52287e-05	67.251	DSPLDVVAINDTGGVK(1)QASHLLK	3	3.5765	1
	TRINITY_DN95457_c0_g1_m.29177	421	K	TRINITY_DN95457_c0_g1|g.29177 ORF TRINITY_DN95457_c0_g1|g.29177 TRINITY_DN95457_c0_g1_m.29177 type:complete len:480 (+) TRINITY_DN95457_c0_g1:274-1713(+)	1	1.95295e-06	62.711	TQLTGIYDLVAVLTHK(1)GR	3	0.05822	1
	TRINITY_DN95457_c0_g1_m.29177	63	K	TRINITY_DN95457_c0_g1|g.29177 ORF TRINITY_DN95457_c0_g1|g.29177 TRINITY_DN95457_c0_g1_m.29177 type:complete len:480 (+) TRINITY_DN95457_c0_g1:274-1713(+)	1	9.32947e-06	93.162	DDADWSTLGVK(1)EGQR	2	0.26506	1
	TRINITY_DN95457_c0_g1_m.29177	7	K	TRINITY_DN95457_c0_g1|g.29177 ORF TRINITY_DN95457_c0_g1|g.29177 TRINITY_DN95457_c0_g1_m.29177 type:complete len:480 (+) TRINITY_DN95457_c0_g1:274-1713(+)	1	0.00617134	74.269	PTVSVK(1)WQK	2	1.73	1
	TRINITY_DN95475_c0_g1_m.29199	289	K	TRINITY_DN95475_c0_g1|g.29199 ORF TRINITY_DN95475_c0_g1|g.29199 TRINITY_DN95475_c0_g1_m.29199 type:complete len:425 (+) TRINITY_DN95475_c0_g1:79-1353(+)	1	0.00033011	99.855	LYSNTK(1)TNFR	2	0.80155	1
	TRINITY_DN95475_c0_g1_m.29199	207	K	TRINITY_DN95475_c0_g1|g.29199 ORF TRINITY_DN95475_c0_g1|g.29199 TRINITY_DN95475_c0_g1_m.29199 type:complete len:425 (+) TRINITY_DN95475_c0_g1:79-1353(+)	1	6.63017e-06	93.649	IVGEVK(1)QAESVPPIASK	2	-3.3066	1
	TRINITY_DN95475_c0_g1_m.29199	282	K	TRINITY_DN95475_c0_g1|g.29199 ORF TRINITY_DN95475_c0_g1|g.29199 TRINITY_DN95475_c0_g1_m.29199 type:complete len:425 (+) TRINITY_DN95475_c0_g1:79-1353(+)	1	0.00245063	89.123	MILDEWK(1)R	2	-1.326	1
	TRINITY_DN95475_c0_g1_m.29199	263	K	TRINITY_DN95475_c0_g1|g.29199 ORF TRINITY_DN95475_c0_g1|g.29199 TRINITY_DN95475_c0_g1_m.29199 type:complete len:425 (+) TRINITY_DN95475_c0_g1:79-1353(+)	0.812663	2.89094e-06	102.03	AEEPAEEEEEAPK(0.187)PK(0.813)PK	3	1.1642	1
	TRINITY_DN95475_c0_g1_m.29199	360	K	TRINITY_DN95475_c0_g1|g.29199 ORF TRINITY_DN95475_c0_g1|g.29199 TRINITY_DN95475_c0_g1_m.29199 type:complete len:425 (+) TRINITY_DN95475_c0_g1:79-1353(+)	1	5.06008e-05	125.17	MLVIGSDSPYK(1)VK	2	0.3206	1
	TRINITY_DN95475_c0_g1_m.29199	275	K	TRINITY_DN95475_c0_g1|g.29199 ORF TRINITY_DN95475_c0_g1|g.29199 TRINITY_DN95475_c0_g1_m.29199 type:complete len:425 (+) TRINITY_DN95475_c0_g1:79-1353(+)	1	0.00457481	57.042	NPLDLLPPSK(1)MILDEWK	2	1.0153	1
	TRINITY_DN95475_c0_g1_m.29199	261	K	TRINITY_DN95475_c0_g1|g.29199 ORF TRINITY_DN95475_c0_g1|g.29199 TRINITY_DN95475_c0_g1_m.29199 type:complete len:425 (+) TRINITY_DN95475_c0_g1:79-1353(+)	1	1.26565e-12	108.5	AEEPAEEEEEAPK(1)PK	2	-3.7754	1
	TRINITY_DN95475_c0_g1_m.29199	248	K	TRINITY_DN95475_c0_g1|g.29199 ORF TRINITY_DN95475_c0_g1|g.29199 TRINITY_DN95475_c0_g1_m.29199 type:complete len:425 (+) TRINITY_DN95475_c0_g1:79-1353(+)	1	3.69098e-14	142.03	PK(1)AEEPAEEEEEAPKPK	3	1.3786	2
	TRINITY_DN95475_c0_g1_m.29199	12	K	TRINITY_DN95475_c0_g1|g.29199 ORF TRINITY_DN95475_c0_g1|g.29199 TRINITY_DN95475_c0_g1_m.29199 type:complete len:425 (+) TRINITY_DN95475_c0_g1:79-1353(+)	1	8.16065e-15	126.29	ALVLHAGWPNK(1)NALK	2	1.3141	1
	TRINITY_DN95475_c0_g1_m.29199	41	K	TRINITY_DN95475_c0_g1|g.29199 ORF TRINITY_DN95475_c0_g1|g.29199 TRINITY_DN95475_c0_g1_m.29199 type:complete len:425 (+) TRINITY_DN95475_c0_g1:79-1353(+)	1	5.41439e-06	102.03	DFQMGVSNK(1)SPEFLK	2	5.1339	1
	TRINITY_DN95475_c0_g1_m.29199	218	K	TRINITY_DN95475_c0_g1|g.29199 ORF TRINITY_DN95475_c0_g1|g.29199 TRINITY_DN95475_c0_g1_m.29199 type:complete len:425 (+) TRINITY_DN95475_c0_g1:79-1353(+)	1	0.000110802	79.889	QAESVPPIASK(1)K	2	-1.3902	1
	TRINITY_DN95475_c0_g1_m.29199	47	K	TRINITY_DN95475_c0_g1|g.29199 ORF TRINITY_DN95475_c0_g1|g.29199 TRINITY_DN95475_c0_g1_m.29199 type:complete len:425 (+) TRINITY_DN95475_c0_g1:79-1353(+)	1	7.405e-07	108.4	SPEFLK(1)MNPIGK	2	-3.4626	1
	TRINITY_DN95475_c0_g1_m.29199	362	K	TRINITY_DN95475_c0_g1|g.29199 ORF TRINITY_DN95475_c0_g1|g.29199 TRINITY_DN95475_c0_g1_m.29199 type:complete len:425 (+) TRINITY_DN95475_c0_g1:79-1353(+)	1	0.000879589	97.033	VK(1)GLWLFR	2	2.1725	1
	TRINITY_DN95475_c0_g1_m.29199	265	K	TRINITY_DN95475_c0_g1|g.29199 ORF TRINITY_DN95475_c0_g1|g.29199 TRINITY_DN95475_c0_g1_m.29199 type:complete len:425 (+) TRINITY_DN95475_c0_g1:79-1353(+)	1	0.00123444	61.194	PK(1)NPLDLLPPSK	2	-2.3908	1
	TRINITY_DN95475_c0_g1_m.29199	177	K	TRINITY_DN95475_c0_g1|g.29199 ORF TRINITY_DN95475_c0_g1|g.29199 TRINITY_DN95475_c0_g1_m.29199 type:complete len:425 (+) TRINITY_DN95475_c0_g1:79-1353(+)	1	2.84462e-08	100.69	IMTK(1)SFTSEFPHVER	3	-0.10371	3
	TRINITY_DN95475_c0_g1_m.29199	224	K	TRINITY_DN95475_c0_g1|g.29199 ORF TRINITY_DN95475_c0_g1|g.29199 TRINITY_DN95475_c0_g1_m.29199 type:complete len:425 (+) TRINITY_DN95475_c0_g1:79-1353(+)	0.999929	0.00901978	72.922	KPAQPK(1)EPAKPK	3	0.77863	1
	TRINITY_DN95481_c0_g1_m.29205	134	K	TRINITY_DN95481_c0_g1|g.29205 ORF TRINITY_DN95481_c0_g1|g.29205 TRINITY_DN95481_c0_g1_m.29205 type:5prime_partial len:539 (+) TRINITY_DN95481_c0_g1:3-1619(+)	1	0.00186402	88.24	LLSAK(1)SEDLIER	2	1.8129	1
	TRINITY_DN95481_c0_g1_m.29205	451	K	TRINITY_DN95481_c0_g1|g.29205 ORF TRINITY_DN95481_c0_g1|g.29205 TRINITY_DN95481_c0_g1_m.29205 type:5prime_partial len:539 (+) TRINITY_DN95481_c0_g1:3-1619(+)	1	0.00497117	54.584	GLYFK(1)ELLTHK	2	0.50693	1
	TRINITY_DN95482_c0_g1_m.29206	319	K	TRINITY_DN95482_c0_g1|g.29206 ORF TRINITY_DN95482_c0_g1|g.29206 TRINITY_DN95482_c0_g1_m.29206 type:5prime_partial len:408 (+) TRINITY_DN95482_c0_g1:3-1226(+)	1	4.97265e-07	89.382	VIDLVK(1)HFMDSK	2	-1.291	1
	TRINITY_DN95482_c0_g1_m.29206	313	K	TRINITY_DN95482_c0_g1|g.29206 ORF TRINITY_DN95482_c0_g1|g.29206 TRINITY_DN95482_c0_g1_m.29206 type:5prime_partial len:408 (+) TRINITY_DN95482_c0_g1:3-1226(+)	1	1.69551e-08	66.509	APEYLALDEK(1)VIDLVK	2	1.7993	1
	TRINITY_DN95495_c2_g1_m.29219	119	K	TRINITY_DN95495_c2_g1|g.29219 ORF TRINITY_DN95495_c2_g1|g.29219 TRINITY_DN95495_c2_g1_m.29219 type:complete len:218 (+) TRINITY_DN95495_c2_g1:176-829(+)	1	7.16134e-12	145.08	ETGYLQELVYK(1)LSK	2	3.7104	1
	TRINITY_DN95525_c0_g1_m.29253	213	K	TRINITY_DN95525_c0_g1|g.29253 ORF TRINITY_DN95525_c0_g1|g.29253 TRINITY_DN95525_c0_g1_m.29253 type:complete len:420 (+) TRINITY_DN95525_c0_g1:91-1350(+)	1	0.000416792	73.891	GVLLYGPPGTGK(1)TMLAK	2	-0.15647	1
	TRINITY_DN95593_c0_g1_m.29362	84	K	TRINITY_DN95593_c0_g1|g.29362 ORF TRINITY_DN95593_c0_g1|g.29362 TRINITY_DN95593_c0_g1_m.29362 type:complete len:387 (+) TRINITY_DN95593_c0_g1:81-1241(+)	1	3.68836e-09	114.35	LDDK(1)IADAEENLGESEVR	2	-1.1959	2
	TRINITY_DN95593_c0_g1_m.29362	104	K	TRINITY_DN95593_c0_g1|g.29362 ORF TRINITY_DN95593_c0_g1|g.29362 TRINITY_DN95593_c0_g1_m.29362 type:complete len:387 (+) TRINITY_DN95593_c0_g1:81-1241(+)	1	0.0323876	41.824	EAHLAK(1)SLYFIR	3	-1.023	1
	TRINITY_DN95593_c0_g1_m.29362	127	K	TRINITY_DN95593_c0_g1|g.29362 ORF TRINITY_DN95593_c0_g1|g.29362 TRINITY_DN95593_c0_g1_m.29362 type:complete len:387 (+) TRINITY_DN95593_c0_g1:81-1241(+)	1	7.89128e-07	99.174	VTESK(1)TVAVGQK	2	-0.43396	1
	TRINITY_DN95593_c0_g1_m.29362	122	K	TRINITY_DN95593_c0_g1|g.29362 ORF TRINITY_DN95593_c0_g1|g.29362 TRINITY_DN95593_c0_g1_m.29362 type:complete len:387 (+) TRINITY_DN95593_c0_g1:81-1241(+)	1	0.000163851	92.707	ALEQLK(1)VTESK	2	-3.3902	1
	TRINITY_DN95601_c0_g1_m.29369	119	K	TRINITY_DN95601_c0_g1|g.29369 ORF TRINITY_DN95601_c0_g1|g.29369 TRINITY_DN95601_c0_g1_m.29369 type:complete len:412 (+) TRINITY_DN95601_c0_g1:101-1336(+)	1	0.000429438	63.212	IIVFVGSPIK(1)HEK	2	-1.1556	1
	TRINITY_DN95601_c0_g1_m.29369	57	K	TRINITY_DN95601_c0_g1|g.29369 ORF TRINITY_DN95601_c0_g1|g.29369 TRINITY_DN95601_c0_g1_m.29369 type:complete len:412 (+) TRINITY_DN95601_c0_g1:101-1336(+)	1	4.41739e-21	175.38	TQSNPENTVGLLTMGAK(1)GVR	2	-0.74581	1
	TRINITY_DN95632_c0_g1_m.29413	413	K	TRINITY_DN95632_c0_g1|g.29413 ORF TRINITY_DN95632_c0_g1|g.29413 TRINITY_DN95632_c0_g1_m.29413 type:complete len:522 (+) TRINITY_DN95632_c0_g1:184-1749(+)	1	0.00360128	79.889	NCK(1)IHHSVVGLR	2	-1.9458	1
	TRINITY_DN95632_c0_g1_m.29413	463	K	TRINITY_DN95632_c0_g1|g.29413 ORF TRINITY_DN95632_c0_g1|g.29413 TRINITY_DN95632_c0_g1_m.29413 type:complete len:522 (+) TRINITY_DN95632_c0_g1:184-1749(+)	1	0.0133644	69.276	GSVPIGIGK(1)NSHVK	2	-3.7106	1
	TRINITY_DN95632_c0_g1_m.29413	278	K	TRINITY_DN95632_c0_g1|g.29413 ORF TRINITY_DN95632_c0_g1|g.29413 TRINITY_DN95632_c0_g1_m.29413 type:complete len:522 (+) TRINITY_DN95632_c0_g1:184-1749(+)	1	0.00224855	73.502	AMK(1)VDTTILGLDDER	2	3.0236	1
	TRINITY_DN95632_c0_g1_m.29413	270	K	TRINITY_DN95632_c0_g1|g.29413 ORF TRINITY_DN95632_c0_g1|g.29413 TRINITY_DN95632_c0_g1_m.29413 type:complete len:522 (+) TRINITY_DN95632_c0_g1:184-1749(+)	1	1.76146e-16	126.17	PK(1)GEQLK	2	-0.67839	2
	TRINITY_DN95632_c0_g1_m.29413	454	K	TRINITY_DN95632_c0_g1|g.29413 ORF TRINITY_DN95632_c0_g1|g.29413 TRINITY_DN95632_c0_g1_m.29413 type:complete len:522 (+) TRINITY_DN95632_c0_g1:184-1749(+)	1	1.17916e-08	115.04	FLFAK(1)GSVPIGIGK	2	-0.23387	1
	TRINITY_DN95632_c0_g1_m.29413	113	K	TRINITY_DN95632_c0_g1|g.29413 ORF TRINITY_DN95632_c0_g1|g.29413 TRINITY_DN95632_c0_g1_m.29413 type:complete len:522 (+) TRINITY_DN95632_c0_g1:184-1749(+)	1	0.00679424	72.042	AK(1)PAVPLGANYR	2	-0.72412	1
	TRINITY_DN95642_c0_g1_m.29422	236	K	TRINITY_DN95642_c0_g1|g.29422 ORF TRINITY_DN95642_c0_g1|g.29422 TRINITY_DN95642_c0_g1_m.29422 type:complete len:318 (+) TRINITY_DN95642_c0_g1:296-1249(+)	1	0.0460916	57.888	TAIK(1)AQDGDK	2	1.7537	1
	TRINITY_DN95642_c0_g1_m.29422	288	K	TRINITY_DN95642_c0_g1|g.29422 ORF TRINITY_DN95642_c0_g1|g.29422 TRINITY_DN95642_c0_g1_m.29422 type:complete len:318 (+) TRINITY_DN95642_c0_g1:296-1249(+)	1	0.0114277	46.068	IK(1)PSLVAELYEK	2	-0.028375	1
	TRINITY_DN95642_c0_g1_m.29422	223	K	TRINITY_DN95642_c0_g1|g.29422 ORF TRINITY_DN95642_c0_g1|g.29422 TRINITY_DN95642_c0_g1_m.29422 type:complete len:318 (+) TRINITY_DN95642_c0_g1:296-1249(+)	1	0.0023923	62.705	FVAEAK(1)FLENPDR	2	4.6028	1
	TRINITY_DN95661_c0_g2_m.29443	18	K	TRINITY_DN95661_c0_g2|g.29443 ORF TRINITY_DN95661_c0_g2|g.29443 TRINITY_DN95661_c0_g2_m.29443 type:complete len:493 (+) TRINITY_DN95661_c0_g2:165-1643(+)	1	4.9354e-06	88.796	AVAAEGEGK(1)TCCAQEVK	2	-5.2055	1
	TRINITY_DN95661_c0_g2_m.29443	133	K	TRINITY_DN95661_c0_g2|g.29443 ORF TRINITY_DN95661_c0_g2|g.29443 TRINITY_DN95661_c0_g2_m.29443 type:complete len:493 (+) TRINITY_DN95661_c0_g2:165-1643(+)	1	4.43784e-14	135.5	IYVIDTATDPK(1)APAVHR	2	-4.3932	2
	TRINITY_DN95663_c1_g1_m.29446	164	K	TRINITY_DN95663_c1_g1|g.29446 ORF TRINITY_DN95663_c1_g1|g.29446 TRINITY_DN95663_c1_g1_m.29446 type:complete len:225 (+) TRINITY_DN95663_c1_g1:137-811(+)	1	0.00464025	75.243	QK(1)IIVSR	2	0.88196	1
	TRINITY_DN95663_c1_g1_m.29446	198	K	TRINITY_DN95663_c1_g1|g.29446 ORF TRINITY_DN95663_c1_g1|g.29446 TRINITY_DN95663_c1_g1_m.29446 type:complete len:225 (+) TRINITY_DN95663_c1_g1:137-811(+)	1	0.000707988	97.594	IVSDGVNAK(1)LLGCHGR	2	-3.7165	1
	TRINITY_DN95663_c1_g1_m.29446	78	K	TRINITY_DN95663_c1_g1|g.29446 ORF TRINITY_DN95663_c1_g1|g.29446 TRINITY_DN95663_c1_g1_m.29446 type:complete len:225 (+) TRINITY_DN95663_c1_g1:137-811(+)	1	0.0481974	56.014	YMTK(1)AAGK	2	0.86826	1
	TRINITY_DN95663_c1_g1_m.29446	82	K	TRINITY_DN95663_c1_g1|g.29446 ORF TRINITY_DN95663_c1_g1|g.29446 TRINITY_DN95663_c1_g1_m.29446 type:complete len:225 (+) TRINITY_DN95663_c1_g1:137-811(+)	1	0.0667436	47.561	AAGK(1)DAFHLR	2	0.26139	1
	TRINITY_DN95671_c6_g1_m.29458	18	K	TRINITY_DN95671_c6_g1|g.29458 ORF TRINITY_DN95671_c6_g1|g.29458 TRINITY_DN95671_c6_g1_m.29458 type:complete len:135 (+) TRINITY_DN95671_c6_g1:3810-4214(+)	1	0.0197266	51.43	MIWDSK(1)VK	2	-2.4744	1
	TRINITY_DN95700_c2_g1_m.29500	347	K	TRINITY_DN95700_c2_g1|g.29500 ORF TRINITY_DN95700_c2_g1|g.29500 TRINITY_DN95700_c2_g1_m.29500 type:complete len:783 (+) TRINITY_DN95700_c2_g1:201-2549(+)	1	0.000455004	91.939	YATTGAGPLVASK(1)EFK	2	-2.7794	1
	TRINITY_DN95718_c2_g1_m.29516	620	K	TRINITY_DN95718_c2_g1|g.29516 ORF TRINITY_DN95718_c2_g1|g.29516 TRINITY_DN95718_c2_g1_m.29516 type:complete len:655 (+) TRINITY_DN95718_c2_g1:468-2432(+)	1	3.02717e-06	92.445	AK(1)VAEAMEVLR	2	-0.61638	1
	TRINITY_DN95718_c2_g1_m.29516	160	K	TRINITY_DN95718_c2_g1|g.29516 ORF TRINITY_DN95718_c2_g1|g.29516 TRINITY_DN95718_c2_g1_m.29516 type:complete len:655 (+) TRINITY_DN95718_c2_g1:468-2432(+)	1	2.86428e-06	81.409	VATDASGQSK(1)GYGFVQFDR	2	0.38029	1
	TRINITY_DN95718_c2_g1_m.29516	275	K	TRINITY_DN95718_c2_g1|g.29516 ORF TRINITY_DN95718_c2_g1|g.29516 TRINITY_DN95718_c2_g1_m.29516 type:complete len:655 (+) TRINITY_DN95718_c2_g1:468-2432(+)	1	9.26769e-06	110.52	K(1)FDDKEWFVGR	2	-0.39418	2
	TRINITY_DN95718_c2_g1_m.29516	279	K	TRINITY_DN95718_c2_g1|g.29516 ORF TRINITY_DN95718_c2_g1|g.29516 TRINITY_DN95718_c2_g1_m.29516 type:complete len:655 (+) TRINITY_DN95718_c2_g1:468-2432(+)	1	0.000339192	106	FDDK(1)EWFVGR	2	-5.3905	2
	TRINITY_DN95754_c1_g3_m.29565	71	K	TRINITY_DN95754_c1_g3|g.29565 ORF TRINITY_DN95754_c1_g3|g.29565 TRINITY_DN95754_c1_g3_m.29565 type:3prime_partial len:132 (+) TRINITY_DN95754_c1_g3:83-475(+)	1	0.0156252	42.072	THFGGGK(1)STGFGLIYDSVESAK	3	-2.4744	1
	TRINITY_DN95754_c1_g3_m.29565	91	K	TRINITY_DN95754_c1_g3|g.29565 ORF TRINITY_DN95754_c1_g3|g.29565 TRINITY_DN95754_c1_g3_m.29565 type:3prime_partial len:132 (+) TRINITY_DN95754_c1_g3:83-475(+)	1	0.04446	67.903	KFEPK(1)YR	2	0.067018	1
	TRINITY_DN95809_c0_g3_m.29630	123	K	TRINITY_DN95809_c0_g3|g.29630 ORF TRINITY_DN95809_c0_g3|g.29630 TRINITY_DN95809_c0_g3_m.29630 type:5prime_partial len:148 (+) TRINITY_DN95809_c0_g3:2-445(+)	1	0.000431076	53.773	DVPGWK(1)VGESVYNSGR	2	2.4129	1
	TRINITY_DN95820_c0_g1_m.29646	237	K	TRINITY_DN95820_c0_g1|g.29646 ORF TRINITY_DN95820_c0_g1|g.29646 TRINITY_DN95820_c0_g1_m.29646 type:complete len:379 (+) TRINITY_DN95820_c0_g1:160-1296(+)	1	6.65921e-07	94.119	MGFNDK(1)EIVALSGAHTLGR	3	-0.23732	1
	TRINITY_DN95820_c0_g1_m.29646	212	K	TRINITY_DN95820_c0_g1|g.29646 ORF TRINITY_DN95820_c0_g1|g.29646 TRINITY_DN95820_c0_g1_m.29646 type:complete len:379 (+) TRINITY_DN95820_c0_g1:160-1296(+)	1	2.90192e-09	84.86	VDVIGPEQCPEEGK(1)LPSAGPPSPADHLR	3	-4.1019	1
	TRINITY_DN95820_c0_g1_m.29646	166	K	TRINITY_DN95820_c0_g1|g.29646 ORF TRINITY_DN95820_c0_g1|g.29646 TRINITY_DN95820_c0_g1_m.29646 type:complete len:379 (+) TRINITY_DN95820_c0_g1:160-1296(+)	1	0.00782999	40.638	DK(1)YSGVTYADLFQLASATAVEEAGGPK	3	4.2846	1
	TRINITY_DN95820_c0_g1_m.29646	291	K	TRINITY_DN95820_c0_g1|g.29646 ORF TRINITY_DN95820_c0_g1|g.29646 TRINITY_DN95820_c0_g1_m.29646 type:complete len:379 (+) TRINITY_DN95820_c0_g1:160-1296(+)	1	6.01217e-06	126.29	FDNSYFK(1)DIK	2	1.6615	1
	TRINITY_DN95820_c0_g1_m.29646	332	K	TRINITY_DN95820_c0_g1|g.29646 ORF TRINITY_DN95820_c0_g1|g.29646 TRINITY_DN95820_c0_g1_m.29646 type:complete len:379 (+) TRINITY_DN95820_c0_g1:160-1296(+)	1	1.45512e-40	178.05	IYSEEYAQDQDSFFK(1)DYAEAHSK	3	0.68783	1
	TRINITY_DN95820_c0_g1_m.29646	146	K	TRINITY_DN95820_c0_g1|g.29646 ORF TRINITY_DN95820_c0_g1|g.29646 TRINITY_DN95820_c0_g1_m.29646 type:complete len:379 (+) TRINITY_DN95820_c0_g1:160-1296(+)	1	4.29501e-09	97.268	YDIELK(1)HGANAGLVNALK	2	-2.0074	2
	TRINITY_DN95820_c0_g1_m.29646	340	K	TRINITY_DN95820_c0_g1|g.29646 ORF TRINITY_DN95820_c0_g1|g.29646 TRINITY_DN95820_c0_g1_m.29646 type:complete len:379 (+) TRINITY_DN95820_c0_g1:160-1296(+)	1	1.07512e-08	139.7	DYAEAHSK(1)LSNLGAK	2	-1.0142	3
	TRINITY_DN95870_c0_g1_m.29707	272	K	TRINITY_DN95870_c0_g1|g.29707 ORF TRINITY_DN95870_c0_g1|g.29707 TRINITY_DN95870_c0_g1_m.29707 type:complete len:326 (+) TRINITY_DN95870_c0_g1:158-1135(+)	1	3.95946e-12	165.02	SPENK(1)AVIVAEVEK	2	2.6717	1
	TRINITY_DN95870_c0_g1_m.29707	201	K	TRINITY_DN95870_c0_g1|g.29707 ORF TRINITY_DN95870_c0_g1|g.29707 TRINITY_DN95870_c0_g1_m.29707 type:complete len:326 (+) TRINITY_DN95870_c0_g1:158-1135(+)	1	0.0565163	52.591	VK(1)EETGGK	2	0.033215	1
	TRINITY_DN95870_c0_g1_m.29707	298	K	TRINITY_DN95870_c0_g1|g.29707 ORF TRINITY_DN95870_c0_g1|g.29707 TRINITY_DN95870_c0_g1_m.29707 type:complete len:326 (+) TRINITY_DN95870_c0_g1:158-1135(+)	1	0.000195593	104	VRPIVYK(1)TLPLAEAAEAHR	3	2.6031	2
	TRINITY_DN95870_c0_g1_m.29707	291	K	TRINITY_DN95870_c0_g1|g.29707 ORF TRINITY_DN95870_c0_g1|g.29707 TRINITY_DN95870_c0_g1_m.29707 type:complete len:326 (+) TRINITY_DN95870_c0_g1:158-1135(+)	1	0.00017899	65.408	LVWPAIEAGK(1)VRPIVYK	3	-1.6344	1
	TRINITY_DN95874_c4_g2_m.29712	45	K	TRINITY_DN95874_c4_g2|g.29712 ORF TRINITY_DN95874_c4_g2|g.29712 TRINITY_DN95874_c4_g2_m.29712 type:complete len:205 (+) TRINITY_DN95874_c4_g2:64-678(+)	1	0.000805705	77.358	VK(1)QGAAWGSSLR	2	-1.0574	1
	TRINITY_DN95878_c5_g2_m.29719	277	K	TRINITY_DN95878_c5_g2|g.29719 ORF TRINITY_DN95878_c5_g2|g.29719 TRINITY_DN95878_c5_g2_m.29719 type:complete len:621 (+) TRINITY_DN95878_c5_g2:100-1962(+)	1	0.00846002	68.49	YRPHGVYK(1)DAR	3	-2.1737	1
	TRINITY_DN95886_c0_g1_m.29729	75	K	TRINITY_DN95886_c0_g1|g.29729 ORF TRINITY_DN95886_c0_g1|g.29729 TRINITY_DN95886_c0_g1_m.29729 type:3prime_partial len:119 (-) TRINITY_DN95886_c0_g1:3-356(-)	1	6.57919e-12	148.69	PGSMGK(1)QYFLGLEK	2	-0.62454	1
	TRINITY_DN95911_c0_g1_m.29776	238	K	TRINITY_DN95911_c0_g1|g.29776 ORF TRINITY_DN95911_c0_g1|g.29776 TRINITY_DN95911_c0_g1_m.29776 type:complete len:591 (+) TRINITY_DN95911_c0_g1:224-1996(+)	1	8.96055e-06	93.772	ADASTEWK(1)EFQTPDGR	2	-0.13882	1
	TRINITY_DN95962_c0_g1_m.29847	4	K	TRINITY_DN95962_c0_g1|g.29847 ORF TRINITY_DN95962_c0_g1|g.29847 TRINITY_DN95962_c0_g1_m.29847 type:complete len:482 (+) TRINITY_DN95962_c0_g1:472-1917(+)	1	0.00874539	63.79	PPK(1)PLDYESLNENVK	2	-1.2769	1
	TRINITY_DN95962_c0_g1_m.29847	90	K	TRINITY_DN95962_c0_g1|g.29847 ORF TRINITY_DN95962_c0_g1|g.29847 TRINITY_DN95962_c0_g1_m.29847 type:complete len:482 (+) TRINITY_DN95962_c0_g1:472-1917(+)	1	5.35587e-15	109.16	AK(1)HYLSMTSGGLGAYSDSR	3	0.079458	4
	TRINITY_DN95962_c0_g1_m.29847	463	K	TRINITY_DN95962_c0_g1|g.29847 ORF TRINITY_DN95962_c0_g1|g.29847 TRINITY_DN95962_c0_g1_m.29847 type:complete len:482 (+) TRINITY_DN95962_c0_g1:472-1917(+)	1	7.45199e-06	104.04	K(1)FNDEFMEQYENYR	2	-0.28032	1
	TRINITY_DN95962_c0_g1_m.29847	357	K	TRINITY_DN95962_c0_g1|g.29847 ORF TRINITY_DN95962_c0_g1|g.29847 TRINITY_DN95962_c0_g1_m.29847 type:complete len:482 (+) TRINITY_DN95962_c0_g1:472-1917(+)	1	4.34637e-16	152.23	YSAESK(1)AVLDSLR	2	4.8137	1
	TRINITY_DN95962_c0_g1_m.29847	400	K	TRINITY_DN95962_c0_g1|g.29847 ORF TRINITY_DN95962_c0_g1|g.29847 TRINITY_DN95962_c0_g1_m.29847 type:complete len:482 (+) TRINITY_DN95962_c0_g1:472-1917(+)	1	0.0460162	48.785	LPPK(1)AIEAAK	2	-0.30762	1
	TRINITY_DN95962_c0_g1_m.29847	121	K	TRINITY_DN95962_c0_g1|g.29847 ORF TRINITY_DN95962_c0_g1|g.29847 TRINITY_DN95962_c0_g1_m.29847 type:complete len:482 (+) TRINITY_DN95962_c0_g1:472-1917(+)	1	0.0152371	83.623	NEIAEFIK(1)R	2	0.99799	1
	TRINITY_DN95994_c0_g1_m.29899	484	K	TRINITY_DN95994_c0_g1|g.29899 ORF TRINITY_DN95994_c0_g1|g.29899 TRINITY_DN95994_c0_g1_m.29899 type:complete len:558 (+) TRINITY_DN95994_c0_g1:1321-2994(+)	1	6.96774e-07	108.24	VAFEK(1)GSSTIGNR	2	-8.8342	1
	TRINITY_DN96009_c0_g7_m.29930	195	K	TRINITY_DN96009_c0_g7|g.29930 ORF TRINITY_DN96009_c0_g7|g.29930 TRINITY_DN96009_c0_g7_m.29930 type:complete len:304 (+) TRINITY_DN96009_c0_g7:64-975(+)	1	0.000166055	55.604	VHTFIATSEIHMQHK(1)LR	3	-1.8118	1
	TRINITY_DN96023_c0_g1_m.29948	434	K	TRINITY_DN96023_c0_g1|g.29948 ORF TRINITY_DN96023_c0_g1|g.29948 TRINITY_DN96023_c0_g1_m.29948 type:5prime_partial len:484 (+) TRINITY_DN96023_c0_g1:3-1454(+)	1	0.000498552	82.437	VVK(1)NLMEGEEGER	2	0.84239	1
	TRINITY_DN96026_c0_g1_m.29952	38	K	TRINITY_DN96026_c0_g1|g.29952 ORF TRINITY_DN96026_c0_g1|g.29952 TRINITY_DN96026_c0_g1_m.29952 type:complete len:281 (+) TRINITY_DN96026_c0_g1:258-1100(+)	1	2.49381e-09	103.17	SSSVVSGSK(1)ASGGAFEFGR	2	-5.916	1
	TRINITY_DN96026_c0_g1_m.29952	230	K	TRINITY_DN96026_c0_g1|g.29952 ORF TRINITY_DN96026_c0_g1|g.29952 TRINITY_DN96026_c0_g1_m.29952 type:complete len:281 (+) TRINITY_DN96026_c0_g1:258-1100(+)	1	2.7608e-07	150.21	GDDVVLYK(1)HGER	2	-2.4718	1
	TRINITY_DN96034_c0_g1_m.29959	119	K	TRINITY_DN96034_c0_g1|g.29959 ORF TRINITY_DN96034_c0_g1|g.29959 TRINITY_DN96034_c0_g1_m.29959 type:5prime_partial len:366 (+) TRINITY_DN96034_c0_g1:3-1100(+)	1	0.000229774	92.445	TIK(1)FYTECLGMK	2	-1.9498	1
	TRINITY_DN96034_c0_g1_m.29959	321	K	TRINITY_DN96034_c0_g1|g.29959 ORF TRINITY_DN96034_c0_g1|g.29959 TRINITY_DN96034_c0_g1_m.29959 type:5prime_partial len:366 (+) TRINITY_DN96034_c0_g1:3-1100(+)	1	0.0002176	59.645	TAEAIK(1)LYGGK	2	2.1041	1
	TRINITY_DN96034_c0_g1_m.29959	326	K	TRINITY_DN96034_c0_g1|g.29959 ORF TRINITY_DN96034_c0_g1|g.29959 TRINITY_DN96034_c0_g1_m.29959 type:5prime_partial len:366 (+) TRINITY_DN96034_c0_g1:3-1100(+)	1	0.00312935	101.41	LYGGK(1)ITR	2	-0.80423	1
	TRINITY_DN96051_c0_g1_m.29985	209	K	TRINITY_DN96051_c0_g1|g.29985 ORF TRINITY_DN96051_c0_g1|g.29985 TRINITY_DN96051_c0_g1_m.29985 type:5prime_partial len:354 (+) TRINITY_DN96051_c0_g1:1-1062(+)	1	2.19448e-11	112.7	HIIGEDDQFIGK(1)K	2	-0.9822	1
	TRINITY_DN96051_c0_g1_m.29985	349	K	TRINITY_DN96051_c0_g1|g.29985 ORF TRINITY_DN96051_c0_g1|g.29985 TRINITY_DN96051_c0_g1_m.29985 type:5prime_partial len:354 (+) TRINITY_DN96051_c0_g1:1-1062(+)	1	2.33575e-05	82.437	GPEFAVIVNSATEK(1)K	2	-0.87352	1
	TRINITY_DN96051_c0_g1_m.29985	236	K	TRINITY_DN96051_c0_g1|g.29985 ORF TRINITY_DN96051_c0_g1|g.29985 TRINITY_DN96051_c0_g1_m.29985 type:5prime_partial len:354 (+) TRINITY_DN96051_c0_g1:1-1062(+)	1	0.000991631	46.068	EAGK(1)TFDVCFQQLK	2	0.36021	1
	TRINITY_DN96093_c1_g5_m.30023	86	K	TRINITY_DN96093_c1_g5|g.30023 ORF TRINITY_DN96093_c1_g5|g.30023 TRINITY_DN96093_c1_g5_m.30023 type:complete len:132 (+) TRINITY_DN96093_c1_g5:89-484(+)	1	0.0483028	46.802	NAPMFK(1)R	2	-0.28787	1
	TRINITY_DN96113_c0_g1_m.30053	197	K	TRINITY_DN96113_c0_g1|g.30053 ORF TRINITY_DN96113_c0_g1|g.30053 TRINITY_DN96113_c0_g1_m.30053 type:complete len:423 (+) TRINITY_DN96113_c0_g1:157-1425(+)	1	1.07005e-09	126.63	GITDEDAAK(1)VVDGLAPK	2	-1.4634	1
	TRINITY_DN96113_c0_g1_m.30053	217	K	TRINITY_DN96113_c0_g1|g.30053 ORF TRINITY_DN96113_c0_g1|g.30053 TRINITY_DN96113_c0_g1_m.30053 type:complete len:423 (+) TRINITY_DN96113_c0_g1:157-1425(+)	1	0.000836946	103.8	NASIEQVK(1)K	2	-0.15657	1
	TRINITY_DN96113_c0_g1_m.30053	181	K	TRINITY_DN96113_c0_g1|g.30053 ORF TRINITY_DN96113_c0_g1|g.30053 TRINITY_DN96113_c0_g1_m.30053 type:complete len:423 (+) TRINITY_DN96113_c0_g1:157-1425(+)	1	0.000492191	59.67	FPDMIVK(1)VPIDVFK	2	2.9379	1
	TRINITY_DN96113_c0_g1_m.30053	70	K	TRINITY_DN96113_c0_g1|g.30053 ORF TRINITY_DN96113_c0_g1|g.30053 TRINITY_DN96113_c0_g1_m.30053 type:complete len:423 (+) TRINITY_DN96113_c0_g1:157-1425(+)	1	0.0257115	54.584	NVFPQEK(1)ELVVK	2	3.114	1
	TRINITY_DN96113_c0_g1_m.30053	75	K	TRINITY_DN96113_c0_g1|g.30053 ORF TRINITY_DN96113_c0_g1|g.30053 TRINITY_DN96113_c0_g1_m.30053 type:complete len:423 (+) TRINITY_DN96113_c0_g1:157-1425(+)	1	4.80171e-05	77.358	ELVVK(1)SQILAGGR	2	-2.3475	1
	TRINITY_DN96113_c0_g1_m.30053	188	K	TRINITY_DN96113_c0_g1|g.30053 ORF TRINITY_DN96113_c0_g1|g.30053 TRINITY_DN96113_c0_g1_m.30053 type:complete len:423 (+) TRINITY_DN96113_c0_g1:157-1425(+)	1	5.39327e-06	74.733	VPIDVFK(1)GITDEDAAK	2	6.7538	1
	TRINITY_DN96113_c0_g1_m.30053	262	K	TRINITY_DN96113_c0_g1|g.30053 ORF TRINITY_DN96113_c0_g1|g.30053 TRINITY_DN96113_c0_g1_m.30053 type:complete len:423 (+) TRINITY_DN96113_c0_g1:157-1425(+)	1	0.000135473	155.82	QK(1)EIFALR	2	-2.287	1
	TRINITY_DN96113_c0_g1_m.30053	48	K	TRINITY_DN96113_c0_g1|g.30053 ORF TRINITY_DN96113_c0_g1|g.30053 TRINITY_DN96113_c0_g1_m.30053 type:complete len:423 (+) TRINITY_DN96113_c0_g1:157-1425(+)	1	5.02703e-06	117.77	YGINVPK(1)GVAVSSVDEVK	2	-1.2773	1
	TRINITY_DN96113_c0_g1_m.30053	59	K	TRINITY_DN96113_c0_g1|g.30053 ORF TRINITY_DN96113_c0_g1|g.30053 TRINITY_DN96113_c0_g1_m.30053 type:complete len:423 (+) TRINITY_DN96113_c0_g1:157-1425(+)	1	1.44168e-05	103.69	GVAVSSVDEVK(1)QALK	2	-1.1853	1
	TRINITY_DN96113_c0_g1_m.30053	119	K	TRINITY_DN96113_c0_g1|g.30053 ORF TRINITY_DN96113_c0_g1|g.30053 TRINITY_DN96113_c0_g1_m.30053 type:complete len:423 (+) TRINITY_DN96113_c0_g1:157-1425(+)	1	5.23154e-26	163.93	MLGQILVTK(1)QTGPQGK	2	0.23754	2
	TRINITY_DN96113_c0_g1_m.30053	205	K	TRINITY_DN96113_c0_g1|g.30053 ORF TRINITY_DN96113_c0_g1|g.30053 TRINITY_DN96113_c0_g1_m.30053 type:complete len:423 (+) TRINITY_DN96113_c0_g1:157-1425(+)	1	0.000116141	94.791	VVDGLAPK(1)VADR	2	0.39479	1
	TRINITY_DN96113_c0_g1_m.30053	393	K	TRINITY_DN96113_c0_g1|g.30053 ORF TRINITY_DN96113_c0_g1|g.30053 TRINITY_DN96113_c0_g1_m.30053 type:complete len:423 (+) TRINITY_DN96113_c0_g1:157-1425(+)	1	4.41582e-15	199.4	LEGTNVDQGK(1)R	2	0.93662	1
	TRINITY_DN96113_c0_g1_m.30053	100	K	TRINITY_DN96113_c0_g1|g.30053 ORF TRINITY_DN96113_c0_g1|g.30053 TRINITY_DN96113_c0_g1_m.30053 type:complete len:423 (+) TRINITY_DN96113_c0_g1:157-1425(+)	1	4.24504e-10	105.78	GGVHIVK(1)AEEVENIAGK	2	-3.3765	2
	TRINITY_DN96113_c0_g1_m.30053	126	K	TRINITY_DN96113_c0_g1|g.30053 ORF TRINITY_DN96113_c0_g1|g.30053 TRINITY_DN96113_c0_g1_m.30053 type:complete len:423 (+) TRINITY_DN96113_c0_g1:157-1425(+)	1	0.00111194	73.655	QTGPQGK(1)IVSK	2	-2.2478	1
	TRINITY_DN96113_c0_g1_m.30053	110	K	TRINITY_DN96113_c0_g1|g.30053 ORF TRINITY_DN96113_c0_g1|g.30053 TRINITY_DN96113_c0_g1_m.30053 type:complete len:423 (+) TRINITY_DN96113_c0_g1:157-1425(+)	1	0.00014257	73.345	AEEVENIAGK(1)MLGQILVTK	2	3.4481	2
	TRINITY_DN96114_c0_g1_m.30054	148	K	TRINITY_DN96114_c0_g1|g.30054 ORF TRINITY_DN96114_c0_g1|g.30054 TRINITY_DN96114_c0_g1_m.30054 type:complete len:221 (+) TRINITY_DN96114_c0_g1:102-764(+)	1	0.00158025	49.487	TPPASVLLLK(1)AAGVEK	2	2.7199	1
	TRINITY_DN96151_c0_g1_m.30119	385	K	TRINITY_DN96151_c0_g1|g.30119 ORF TRINITY_DN96151_c0_g1|g.30119 TRINITY_DN96151_c0_g1_m.30119 type:complete len:492 (+) TRINITY_DN96151_c0_g1:187-1662(+)	1	8.16084e-05	97.175	ILAEK(1)GIIQEEK	2	2.09	1
	TRINITY_DN96228_c0_g1_m.30249	649	K	TRINITY_DN96228_c0_g1|g.30249 ORF TRINITY_DN96228_c0_g1|g.30249 TRINITY_DN96228_c0_g1_m.30249 type:complete len:783 (+) TRINITY_DN96228_c0_g1:95-2443(+)	1	0.00114622	54.27	LSYSAEDEGK(1)TER	2	-2.0946	1
	TRINITY_DN96241_c1_g1_m.30260	143	K	TRINITY_DN96241_c1_g1|g.30260 ORF TRINITY_DN96241_c1_g1|g.30260 TRINITY_DN96241_c1_g1_m.30260 type:complete len:772 (+) TRINITY_DN96241_c1_g1:376-2691(+)	1	0.000518202	73.891	ALVSSPEQYAEMYK(1)K	2	0.062068	1
	TRINITY_DN96254_c0_g2_m.30286	434	K	TRINITY_DN96254_c0_g2|g.30286 ORF TRINITY_DN96254_c0_g2|g.30286 TRINITY_DN96254_c0_g2_m.30286 type:complete len:477 (+) TRINITY_DN96254_c0_g2:314-1744(+)	1	0.0151753	65.404	LAEGFSEFK(1)R	2	-3.6152	1
	TRINITY_DN96346_c5_g8_m.30421	110	K	TRINITY_DN96346_c5_g8|g.30421 ORF TRINITY_DN96346_c5_g8|g.30421 TRINITY_DN96346_c5_g8_m.30421 type:complete len:368 (+) TRINITY_DN96346_c5_g8:195-1298(+)	1	0.000693971	107.08	GPMATPIGK(1)GHR	2	-0.37107	1
	TRINITY_DN96411_c0_g1_m.30511	137	K	TRINITY_DN96411_c0_g1|g.30511 ORF TRINITY_DN96411_c0_g1|g.30511 TRINITY_DN96411_c0_g1_m.30511 type:complete len:153 (+) TRINITY_DN96411_c0_g1:87-545(+)	1	0.00608123	65.404	GQHTK(1)TTGR	2	-0.98078	1
	TRINITY_DN96411_c0_g1_m.30511	106	K	TRINITY_DN96411_c0_g1|g.30511 ORF TRINITY_DN96411_c0_g1|g.30511 TRINITY_DN96411_c0_g1_m.30511 type:complete len:153 (+) TRINITY_DN96411_c0_g1:87-545(+)	1	9.42598e-05	87.573	YSQVVSNALDMK(1)LR	2	-2.2031	2
	TRINITY_DN96411_c0_g1_m.30511	54	K	TRINITY_DN96411_c0_g1|g.30511 ORF TRINITY_DN96411_c0_g1|g.30511 TRINITY_DN96411_c0_g1_m.30511 type:complete len:153 (+) TRINITY_DN96411_c0_g1:87-545(+)	0.999995	0.0602673	57.888	KADVDMNK(1)R	2	0.93923	1
	TRINITY_DN96413_c0_g1_m.30512	124	K	TRINITY_DN96413_c0_g1|g.30512 ORF TRINITY_DN96413_c0_g1|g.30512 TRINITY_DN96413_c0_g1_m.30512 type:complete len:412 (+) TRINITY_DN96413_c0_g1:184-1419(+)	1	0.000422237	104.39	ELAQQIEK(1)VMR	2	0.48142	1
	TRINITY_DN96413_c0_g1_m.30512	60	K	TRINITY_DN96413_c0_g1|g.30512 ORF TRINITY_DN96413_c0_g1|g.30512 TRINITY_DN96413_c0_g1_m.30512 type:complete len:412 (+) TRINITY_DN96413_c0_g1:184-1419(+)	1	1.64659e-09	128.41	GIYGYGFEK(1)PSAIQQR	2	-1.2015	1
	TRINITY_DN96413_c0_g1_m.30512	235	K	TRINITY_DN96413_c0_g1|g.30512 ORF TRINITY_DN96413_c0_g1|g.30512 TRINITY_DN96413_c0_g1_m.30512 type:complete len:412 (+) TRINITY_DN96413_c0_g1:184-1419(+)	1	0.0146849	67.889	FMNK(1)PVR	2	-0.15692	2
	TRINITY_DN96424_c0_g1_m.30528	21	K	TRINITY_DN96424_c0_g1|g.30528 ORF TRINITY_DN96424_c0_g1|g.30528 TRINITY_DN96424_c0_g1_m.30528 type:complete len:614 (+) TRINITY_DN96424_c0_g1:101-1942(+)	1	0.0441008	48.157	VLDEGK(1)LSR	2	0.61106	1
	TRINITY_DN96424_c0_g1_m.30528	204	K	TRINITY_DN96424_c0_g1|g.30528 ORF TRINITY_DN96424_c0_g1|g.30528 TRINITY_DN96424_c0_g1_m.30528 type:complete len:614 (+) TRINITY_DN96424_c0_g1:101-1942(+)	1	0.00611993	50.09	IVQDNIQYAK(1)AVK	2	-3.9341	1
	TRINITY_DN96453_c1_g1_m.30570	57	K	TRINITY_DN96453_c1_g1|g.30570 ORF TRINITY_DN96453_c1_g1|g.30570 TRINITY_DN96453_c1_g1_m.30570 type:complete len:384 (+) TRINITY_DN96453_c1_g1:222-1373(+)	1	0.000190619	71.896	HFTANEEDPK(1)VK	2	-0.16131	1
	TRINITY_DN96503_c0_g1_m.30642	141	K	TRINITY_DN96503_c0_g1|g.30642 ORF TRINITY_DN96503_c0_g1|g.30642 TRINITY_DN96503_c0_g1_m.30642 type:complete len:316 (+) TRINITY_DN96503_c0_g1:98-1045(+)	1	0.0185083	48.157	LAK(1)EYMEK	2	2.179	1
	TRINITY_DN96526_c6_g3_m.30683	226	K	TRINITY_DN96526_c6_g3|g.30683 ORF TRINITY_DN96526_c6_g3|g.30683 TRINITY_DN96526_c6_g3_m.30683 type:complete len:397 (+) TRINITY_DN96526_c6_g3:217-1407(+)	1	0.00907614	51.872	SAHVAAAK(1)AAK	2	-1.7482	1
	TRINITY_DN96526_c6_g3_m.30683	313	K	TRINITY_DN96526_c6_g3|g.30683 ORF TRINITY_DN96526_c6_g3|g.30683 TRINITY_DN96526_c6_g3_m.30683 type:complete len:397 (+) TRINITY_DN96526_c6_g3:217-1407(+)	1	0.0137983	69.905	YYSK(1)DFNGR	2	0.07833	1
	TRINITY_DN96562_c0_g1_m.30729	265	K	TRINITY_DN96562_c0_g1|g.30729 ORF TRINITY_DN96562_c0_g1|g.30729 TRINITY_DN96562_c0_g1_m.30729 type:complete len:507 (+) TRINITY_DN96562_c0_g1:350-1870(+)	1	7.405e-07	99.174	YSADALK(1)DEVNR	2	-0.37488	1
	TRINITY_DN96562_c0_g1_m.30729	429	K	TRINITY_DN96562_c0_g1|g.30729 ORF TRINITY_DN96562_c0_g1|g.30729 TRINITY_DN96562_c0_g1_m.30729 type:complete len:507 (+) TRINITY_DN96562_c0_g1:350-1870(+)	1	0.000956187	101.82	LGVTYK(1)QIGGK	2	-1.6666	1
	TRINITY_DN96562_c0_g1_m.30729	258	K	TRINITY_DN96562_c0_g1|g.30729 ORF TRINITY_DN96562_c0_g1|g.30729 TRINITY_DN96562_c0_g1_m.30729 type:complete len:507 (+) TRINITY_DN96562_c0_g1:350-1870(+)	1	6.72056e-05	102.57	GFK(1)YSADALKDEVNR	2	-3.2169	1
	TRINITY_DN96613_c0_g1_m.30808	222	K	TRINITY_DN96613_c0_g1|g.30808 ORF TRINITY_DN96613_c0_g1|g.30808 TRINITY_DN96613_c0_g1_m.30808 type:complete len:486 (+) TRINITY_DN96613_c0_g1:122-1579(+)	1	0.000591742	60.547	STYVQTVK(1)TAR	2	-2.2185	1
	TRINITY_DN96658_c0_g1_m.30872	30	K	TRINITY_DN96658_c0_g1|g.30872 ORF TRINITY_DN96658_c0_g1|g.30872 TRINITY_DN96658_c0_g1_m.30872 type:complete len:179 (+) TRINITY_DN96658_c0_g1:204-740(+)	1	0.00203022	67.881	MK(1)LWATNEVR	2	3.7732	1
	TRINITY_DN96669_c1_g1_m.30885	365	K	TRINITY_DN96669_c1_g1|g.30885 ORF TRINITY_DN96669_c1_g1|g.30885 TRINITY_DN96669_c1_g1_m.30885 type:complete len:392 (+) TRINITY_DN96669_c1_g1:249-1424(+)	1	0.000786203	82.437	TQVAYGSK(1)NEIIR	2	-1.1645	1
	TRINITY_DN96669_c1_g1_m.30885	256	K	TRINITY_DN96669_c1_g1|g.30885 ORF TRINITY_DN96669_c1_g1|g.30885 TRINITY_DN96669_c1_g1_m.30885 type:complete len:392 (+) TRINITY_DN96669_c1_g1:249-1424(+)	1	2.27718e-36	194.83	DTTTIGEGK(1)MFSPGNLR	2	4.9699	1
	TRINITY_DN96669_c1_g1_m.30885	316	K	TRINITY_DN96669_c1_g1|g.30885 ORF TRINITY_DN96669_c1_g1|g.30885 TRINITY_DN96669_c1_g1_m.30885 type:complete len:392 (+) TRINITY_DN96669_c1_g1:249-1424(+)	1	7.43778e-08	131.54	GIFTNVTSPSAK(1)AK	2	1.4483	1
	TRINITY_DN96669_c1_g1_m.30885	247	K	TRINITY_DN96669_c1_g1|g.30885 ORF TRINITY_DN96669_c1_g1|g.30885 TRINITY_DN96669_c1_g1_m.30885 type:complete len:392 (+) TRINITY_DN96669_c1_g1:249-1424(+)	1	3.64787e-12	154.09	WQHVK(1)DTTTIGEGK	2	-1.8883	2
	TRINITY_DN96669_c1_g1_m.30885	242	K	TRINITY_DN96669_c1_g1|g.30885 ORF TRINITY_DN96669_c1_g1|g.30885 TRINITY_DN96669_c1_g1_m.30885 type:complete len:392 (+) TRINITY_DN96669_c1_g1:249-1424(+)	1	2.8009e-16	164.3	DIPGTHEFLLLDEGK(1)WQHVK	3	2.9938	1
	TRINITY_DN96698_c6_g2_m.30924	22	K	TRINITY_DN96698_c6_g2|g.30924 ORF TRINITY_DN96698_c6_g2|g.30924 TRINITY_DN96698_c6_g2_m.30924 type:complete len:330 (+) TRINITY_DN96698_c6_g2:135-1124(+)	1	0.00158074	93.467	SAK(1)VFVAGHR	2	-0.58401	1
	TRINITY_DN96703_c0_g2_m.30937	292	K	TRINITY_DN96703_c0_g2|g.30937 ORF TRINITY_DN96703_c0_g2|g.30937 TRINITY_DN96703_c0_g2_m.30937 type:complete len:335 (+) TRINITY_DN96703_c0_g2:349-1353(+)	1	0.0192596	49.058	WK(1)TENIR	2	0.32655	1
	TRINITY_DN96759_c4_g1_m.31020	63	K	TRINITY_DN96759_c4_g1|g.31020 ORF TRINITY_DN96759_c4_g1|g.31020 TRINITY_DN96759_c4_g1_m.31020 type:complete len:217 (+) TRINITY_DN96759_c4_g1:196-846(+)	1	3.49179e-09	94.63	MK(1)VCMLGDAQHVEEAEK	3	1.6902	4
	TRINITY_DN96759_c4_g1_m.31020	53	K	TRINITY_DN96759_c4_g1|g.31020 ORF TRINITY_DN96759_c4_g1|g.31020 TRINITY_DN96759_c4_g1_m.31020 type:complete len:217 (+) TRINITY_DN96759_c4_g1:196-846(+)	1	5.53591e-05	106	FSGSVK(1)LPHIPR	2	-3.0776	1
	TRINITY_DN96759_c4_g1_m.31020	3	K	TRINITY_DN96759_c4_g1|g.31020 ORF TRINITY_DN96759_c4_g1|g.31020 TRINITY_DN96759_c4_g1_m.31020 type:complete len:217 (+) TRINITY_DN96759_c4_g1:196-846(+)	1	0.000169322	133.98	SK(1)LQSDVLR	2	-0.74765	1
	TRINITY_DN96759_c4_g1_m.31020	129	K	TRINITY_DN96759_c4_g1|g.31020 ORF TRINITY_DN96759_c4_g1|g.31020 TRINITY_DN96759_c4_g1_m.31020 type:complete len:217 (+) TRINITY_DN96759_c4_g1:196-846(+)	1	0.0147797	58.426	LLGPGLNK(1)AGK	2	1.3218	1
	TRINITY_DN96759_c4_g1_m.31020	146	K	TRINITY_DN96759_c4_g1|g.31020 ORF TRINITY_DN96759_c4_g1|g.31020 TRINITY_DN96759_c4_g1_m.31020 type:complete len:217 (+) TRINITY_DN96759_c4_g1:196-846(+)	1	3.91411e-39	166.59	FPTLVTHQESLESK(1)VNETK	3	-0.80591	1
	TRINITY_DN96781_c0_g1_m.31050	181	K	TRINITY_DN96781_c0_g1|g.31050 ORF TRINITY_DN96781_c0_g1|g.31050 TRINITY_DN96781_c0_g1_m.31050 type:5prime_partial len:473 (+) TRINITY_DN96781_c0_g1:1-1419(+)	1	0.0119003	52.591	VVGSVEEAK(1)K	2	-0.23388	1
	TRINITY_DN96823_c0_g1_m.31121	353	K	TRINITY_DN96823_c0_g1|g.31121 ORF TRINITY_DN96823_c0_g1|g.31121 TRINITY_DN96823_c0_g1_m.31121 type:complete len:509 (+) TRINITY_DN96823_c0_g1:528-2054(+)	1	0.000442419	79.889	ENFVK(1)GIEVIK	2	-1.0186	1
	TRINITY_DN96823_c0_g1_m.31121	364	K	TRINITY_DN96823_c0_g1|g.31121 ORF TRINITY_DN96823_c0_g1|g.31121 TRINITY_DN96823_c0_g1_m.31121 type:complete len:509 (+) TRINITY_DN96823_c0_g1:528-2054(+)	1	0.00748448	74.733	SQGGK(1)VLTGGYAIESK	2	17.866	1
	TRINITY_DN96823_c0_g1_m.31121	79	K	TRINITY_DN96823_c0_g1|g.31121 ORF TRINITY_DN96823_c0_g1|g.31121 TRINITY_DN96823_c0_g1_m.31121 type:complete len:509 (+) TRINITY_DN96823_c0_g1:528-2054(+)	1	9.08206e-06	113.14	IWMQLPAPK(1)R	2	-0.39024	2
	TRINITY_DN96852_c0_g1_m.31155	170	K	TRINITY_DN96852_c0_g1|g.31155 ORF TRINITY_DN96852_c0_g1|g.31155 TRINITY_DN96852_c0_g1_m.31155 type:complete len:276 (+) TRINITY_DN96852_c0_g1:106-933(+)	1	0.000100602	96.946	DK(1)STVDATTNR	2	1.8323	1
	TRINITY_DN96852_c0_g1_m.31155	33	K	TRINITY_DN96852_c0_g1|g.31155 ORF TRINITY_DN96852_c0_g1|g.31155 TRINITY_DN96852_c0_g1_m.31155 type:complete len:276 (+) TRINITY_DN96852_c0_g1:106-933(+)	1	1.55035e-09	129.69	GFYQTK(1)HVEHK	3	0.87945	2
	TRINITY_DN96852_c0_g1_m.31155	186	K	TRINITY_DN96852_c0_g1|g.31155 ORF TRINITY_DN96852_c0_g1|g.31155 TRINITY_DN96852_c0_g1_m.31155 type:complete len:276 (+) TRINITY_DN96852_c0_g1:106-933(+)	1	0.00487059	86.205	INSLLFK(1)VR	2	-3.625	1
	TRINITY_DN96852_c0_g1_m.31155	157	K	TRINITY_DN96852_c0_g1|g.31155 ORF TRINITY_DN96852_c0_g1|g.31155 TRINITY_DN96852_c0_g1_m.31155 type:complete len:276 (+) TRINITY_DN96852_c0_g1:106-933(+)	1	0.0300146	52.662	ASSQTELLK(1)SLLATEVGTTR	3	1.0421	1
	TRINITY_DN96873_c0_g1_m.31179	159	K	TRINITY_DN96873_c0_g1|g.31179 ORF TRINITY_DN96873_c0_g1|g.31179 TRINITY_DN96873_c0_g1_m.31179 type:5prime_partial len:333 (+) TRINITY_DN96873_c0_g1:2-1000(+)	1	0.0738564	42.835	VTK(1)SDLK	2	1.5241	1
	TRINITY_DN96873_c0_g1_m.31179	283	K	TRINITY_DN96873_c0_g1|g.31179 ORF TRINITY_DN96873_c0_g1|g.31179 TRINITY_DN96873_c0_g1_m.31179 type:5prime_partial len:333 (+) TRINITY_DN96873_c0_g1:2-1000(+)	1	0.000239317	77.157	LVAAIDGLPDPGGPK(1)FK	2	1.4134	1
	TRINITY_DN96873_c0_g1_m.31179	188	K	TRINITY_DN96873_c0_g1|g.31179 ORF TRINITY_DN96873_c0_g1|g.31179 TRINITY_DN96873_c0_g1_m.31179 type:5prime_partial len:333 (+) TRINITY_DN96873_c0_g1:2-1000(+)	1	0.00615968	48.892	LTSK(1)ADAFEYADSVLEK	2	1.1905	1
	TRINITY_DN96884_c0_g1_m.31191	128	K	TRINITY_DN96884_c0_g1|g.31191 ORF TRINITY_DN96884_c0_g1|g.31191 TRINITY_DN96884_c0_g1_m.31191 type:complete len:359 (+) TRINITY_DN96884_c0_g1:52-1128(+)	1	2.18469e-05	110.91	GETTTQGHDDLGK(1)R	3	-0.54551	2
	TRINITY_DN96884_c0_g1_m.31191	306	K	TRINITY_DN96884_c0_g1|g.31191 ORF TRINITY_DN96884_c0_g1|g.31191 TRINITY_DN96884_c0_g1_m.31191 type:complete len:359 (+) TRINITY_DN96884_c0_g1:52-1128(+)	1	4.63578e-05	65.879	ALQQSTLK(1)AWSGK	2	-2.1759	1
	TRINITY_DN96884_c0_g1_m.31191	241	K	TRINITY_DN96884_c0_g1|g.31191 ORF TRINITY_DN96884_c0_g1|g.31191 TRINITY_DN96884_c0_g1_m.31191 type:complete len:359 (+) TRINITY_DN96884_c0_g1:52-1128(+)	1	0.00139564	105.94	VSPK(1)VVAEHTVR	2	-1.133	1
	TRINITY_DN96884_c0_g1_m.31191	115	K	TRINITY_DN96884_c0_g1|g.31191 ORF TRINITY_DN96884_c0_g1|g.31191 TRINITY_DN96884_c0_g1_m.31191 type:complete len:359 (+) TRINITY_DN96884_c0_g1:52-1128(+)	1	9.07071e-12	130.12	GTIELAGTK(1)GETTTQGHDDLGK	3	-0.87344	1
	TRINITY_DN96884_c0_g1_m.31191	327	K	TRINITY_DN96884_c0_g1|g.31191 ORF TRINITY_DN96884_c0_g1|g.31191 TRINITY_DN96884_c0_g1_m.31191 type:complete len:359 (+) TRINITY_DN96884_c0_g1:52-1128(+)	1	0.0166011	63.212	CK(1)ANSEATLGTYK	2	-4.2272	1
	TRINITY_DN96884_c0_g1_m.31191	317	K	TRINITY_DN96884_c0_g1|g.31191 ORF TRINITY_DN96884_c0_g1|g.31191 TRINITY_DN96884_c0_g1_m.31191 type:complete len:359 (+) TRINITY_DN96884_c0_g1:52-1128(+)	1	0.000585399	93.467	VENVEK(1)AR	2	-0.59756	1
	TRINITY_DN96884_c0_g1_m.31191	106	K	TRINITY_DN96884_c0_g1|g.31191 ORF TRINITY_DN96884_c0_g1|g.31191 TRINITY_DN96884_c0_g1_m.31191 type:complete len:359 (+) TRINITY_DN96884_c0_g1:52-1128(+)	1	8.11921e-07	99.276	VDK(1)GTIELAGTK	2	-0.26934	1
	TRINITY_DN96884_c0_g1_m.31191	311	K	TRINITY_DN96884_c0_g1|g.31191 ORF TRINITY_DN96884_c0_g1|g.31191 TRINITY_DN96884_c0_g1_m.31191 type:complete len:359 (+) TRINITY_DN96884_c0_g1:52-1128(+)	1	0.000232134	90.306	AWSGK(1)VENVEK	2	-0.35637	1
	TRINITY_DN96886_c1_g1_m.31194	350	K	TRINITY_DN96886_c1_g1|g.31194 ORF TRINITY_DN96886_c1_g1|g.31194 TRINITY_DN96886_c1_g1_m.31194 type:complete len:720 (+) TRINITY_DN96886_c1_g1:249-2408(+)	1	0.0173465	62.88	VK(1)ANLQSR	2	0.22596	1
	TRINITY_DN96886_c1_g1_m.31194	165	K	TRINITY_DN96886_c1_g1|g.31194 ORF TRINITY_DN96886_c1_g1|g.31194 TRINITY_DN96886_c1_g1_m.31194 type:complete len:720 (+) TRINITY_DN96886_c1_g1:249-2408(+)	1	0.0114277	52.837	ALEMMLTSK(1)PVK	2	1.6353	1
	TRINITY_DN96991_c0_g1_m.31332	127	K	TRINITY_DN96991_c0_g1|g.31332 ORF TRINITY_DN96991_c0_g1|g.31332 TRINITY_DN96991_c0_g1_m.31332 type:5prime_partial len:528 (+) TRINITY_DN96991_c0_g1:2-1585(+)	1	0.00119487	61.194	VAQEFLDYLSGK(1)R	2	0.35711	1
	TRINITY_DN96991_c0_g1_m.31332	250	K	TRINITY_DN96991_c0_g1|g.31332 ORF TRINITY_DN96991_c0_g1|g.31332 TRINITY_DN96991_c0_g1_m.31332 type:5prime_partial len:528 (+) TRINITY_DN96991_c0_g1:2-1585(+)	1	0.00148519	54.584	ADTK(1)VYGIVGK	2	0.3945	1
	TRINITY_DN96991_c0_g1_m.31332	41	K	TRINITY_DN96991_c0_g1|g.31332 ORF TRINITY_DN96991_c0_g1|g.31332 TRINITY_DN96991_c0_g1_m.31332 type:5prime_partial len:528 (+) TRINITY_DN96991_c0_g1:2-1585(+)	1	0.000278039	77.157	SVEQMLSEMATAK(1)VR	2	2.3142	1
	TRINITY_DN96991_c0_g1_m.31332	336	K	TRINITY_DN96991_c0_g1|g.31332 ORF TRINITY_DN96991_c0_g1|g.31332 TRINITY_DN96991_c0_g1_m.31332 type:5prime_partial len:528 (+) TRINITY_DN96991_c0_g1:2-1585(+)	1	0.00332899	74.424	YIGAVNTLIK(1)R	2	3.0402	1
	TRINITY_DN96991_c0_g1_m.31332	377	K	TRINITY_DN96991_c0_g1|g.31332 ORF TRINITY_DN96991_c0_g1|g.31332 TRINITY_DN96991_c0_g1_m.31332 type:5prime_partial len:528 (+) TRINITY_DN96991_c0_g1:2-1585(+)	1	1.66018e-12	107.46	VSAGSPLADK(1)VFVVLGAGGAGK	2	4.2389	1
	TRINITY_DN96991_c0_g1_m.31332	82	K	TRINITY_DN96991_c0_g1|g.31332 ORF TRINITY_DN96991_c0_g1|g.31332 TRINITY_DN96991_c0_g1_m.31332 type:5prime_partial len:528 (+) TRINITY_DN96991_c0_g1:2-1585(+)	1	2.06691e-05	98.865	PK(1)WEGGEYEGDDGR	2	-1.8907	1
	TRINITY_DN97041_c0_g1_m.31391	324	K	TRINITY_DN97041_c0_g1|g.31391 ORF TRINITY_DN97041_c0_g1|g.31391 TRINITY_DN97041_c0_g1_m.31391 type:complete len:546 (+) TRINITY_DN97041_c0_g1:143-1780(+)	1	0.00188761	85.622	LPVK(1)GDILAYR	2	-2.3989	1
	TRINITY_DN97057_c0_g1_m.31419	416	K	TRINITY_DN97057_c0_g1|g.31419 ORF TRINITY_DN97057_c0_g1|g.31419 TRINITY_DN97057_c0_g1_m.31419 type:complete len:446 (+) TRINITY_DN97057_c0_g1:121-1458(+)	1	0.00201975	97.277	ILDQCK(1)VGDK	2	3.2676	1
	TRINITY_DN97057_c0_g1_m.31419	219	K	TRINITY_DN97057_c0_g1|g.31419 ORF TRINITY_DN97057_c0_g1|g.31419 TRINITY_DN97057_c0_g1_m.31419 type:complete len:446 (+) TRINITY_DN97057_c0_g1:121-1458(+)	1	0.0384032	44.767	IEAPK(1)DK	2	1.1913	1
	TRINITY_DN97057_c0_g1_m.31419	208	K	TRINITY_DN97057_c0_g1|g.31419 ORF TRINITY_DN97057_c0_g1|g.31419 TRINITY_DN97057_c0_g1_m.31419 type:complete len:446 (+) TRINITY_DN97057_c0_g1:121-1458(+)	1	0.000353724	56.938	VVGFDQDK(1)DVAVLR	2	-1.5063	1
	TRINITY_DN97071_c0_g1_m.31444	107	K	TRINITY_DN97071_c0_g1|g.31444 ORF TRINITY_DN97071_c0_g1|g.31444 TRINITY_DN97071_c0_g1_m.31444 type:5prime_partial len:374 (+) TRINITY_DN97071_c0_g1:3-1124(+)	1	0.0144143	43.306	LVEVYEDK(1)DNAR	2	0.089875	1
	TRINITY_DN97071_c0_g1_m.31445	26	K	TRINITY_DN97071_c0_g1|g.31445 ORF TRINITY_DN97071_c0_g1|g.31445 TRINITY_DN97071_c0_g1_m.31445 type:complete len:187 (+) TRINITY_DN97071_c0_g1:1262-1822(+)	1	0.0618472	53.517	IIQTK(1)ENVEK	2	-1.806	1
	TRINITY_DN97113_c0_g1_m.31526	365	K	TRINITY_DN97113_c0_g1|g.31526 ORF TRINITY_DN97113_c0_g1|g.31526 TRINITY_DN97113_c0_g1_m.31526 type:complete len:400 (+) TRINITY_DN97113_c0_g1:1691-2890(+)	1	2.50511e-05	94.804	AHK(1)EGTTLK	2	0.73828	1
	TRINITY_DN97113_c0_g1_m.31526	174	K	TRINITY_DN97113_c0_g1|g.31526 ORF TRINITY_DN97113_c0_g1|g.31526 TRINITY_DN97113_c0_g1_m.31526 type:complete len:400 (+) TRINITY_DN97113_c0_g1:1691-2890(+)	1	1.84246e-09	129.04	LYQLAQGGTAVGTGLNTK(1)K	2	-3.2867	1
	TRINITY_DN97113_c0_g1_m.31526	57	K	TRINITY_DN97113_c0_g1|g.31526 ORF TRINITY_DN97113_c0_g1|g.31526 TRINITY_DN97113_c0_g1_m.31526 type:complete len:400 (+) TRINITY_DN97113_c0_g1:1691-2890(+)	1	1.49694e-07	117.45	ASEILGHK(1)HGEK	3	1.324	2
	TRINITY_DN97113_c0_g1_m.31527	54	K	TRINITY_DN97113_c0_g1|g.31527 ORF TRINITY_DN97113_c0_g1|g.31527 TRINITY_DN97113_c0_g1_m.31527 type:complete len:215 (+) TRINITY_DN97113_c0_g1:293-937(+)	1	0.000156612	48.892	DTFGPILVPADK(1)LWGAQTQR	2	1.3107	1
	TRINITY_DN97115_c1_g1_m.31530	560	K	TRINITY_DN97115_c1_g1|g.31530 ORF TRINITY_DN97115_c1_g1|g.31530 TRINITY_DN97115_c1_g1_m.31530 type:complete len:685 (+) TRINITY_DN97115_c1_g1:88-2142(+)	1	2.82871e-34	191.95	YASEVYQYQQQGK(1)SR	2	-3.2433	1
	TRINITY_DN97149_c0_g1_m.31576	426	K	TRINITY_DN97149_c0_g1|g.31576 ORF TRINITY_DN97149_c0_g1|g.31576 TRINITY_DN97149_c0_g1_m.31576 type:complete len:508 (+) TRINITY_DN97149_c0_g1:186-1709(+)	1	3.97725e-05	121.71	QATK(1)SAVLMNLESR	2	-2.4085	1
	TRINITY_DN97149_c0_g1_m.31576	291	K	TRINITY_DN97149_c0_g1|g.31576 ORF TRINITY_DN97149_c0_g1|g.31576 TRINITY_DN97149_c0_g1_m.31576 type:complete len:508 (+) TRINITY_DN97149_c0_g1:186-1709(+)	1	0.00264778	51.07	TARPEEPK(1)SVYVGGEYR	3	1.8179	1
	TRINITY_DN97149_c0_g1_m.31576	283	K	TRINITY_DN97149_c0_g1|g.31576 ORF TRINITY_DN97149_c0_g1|g.31576 TRINITY_DN97149_c0_g1_m.31576 type:complete len:508 (+) TRINITY_DN97149_c0_g1:186-1709(+)	1	0.000124226	88.796	IAEPLLSDLPK(1)TARPEEPK	3	1.6937	2
	TRINITY_DN97149_c0_g1_m.31576	129	K	TRINITY_DN97149_c0_g1|g.31576 ORF TRINITY_DN97149_c0_g1|g.31576 TRINITY_DN97149_c0_g1_m.31576 type:complete len:508 (+) TRINITY_DN97149_c0_g1:186-1709(+)	1	0.0441008	48.157	MAFK(1)STTNR	2	-1.8421	1
	TRINITY_DN97200_c0_g1_m.31660	96	K	TRINITY_DN97200_c0_g1|g.31660 ORF TRINITY_DN97200_c0_g1|g.31660 TRINITY_DN97200_c0_g1_m.31660 type:complete len:197 (+) TRINITY_DN97200_c0_g1:142-732(+)	1	0.0147249	62.88	EMK(1)IEEER	2	2.4213	1
	TRINITY_DN97208_c0_g2_m.31666	124	K	TRINITY_DN97208_c0_g2|g.31666 ORF TRINITY_DN97208_c0_g2|g.31666 TRINITY_DN97208_c0_g2_m.31666 type:complete len:569 (+) TRINITY_DN97208_c0_g2:170-1876(+)	1	0.00193988	45.17	NVVPDVWHVIEK(1)INDFSER	3	-0.73432	1
	TRINITY_DN97208_c0_g2_m.31666	66	K	TRINITY_DN97208_c0_g2|g.31666 ORF TRINITY_DN97208_c0_g2|g.31666 TRINITY_DN97208_c0_g2_m.31666 type:complete len:569 (+) TRINITY_DN97208_c0_g2:170-1876(+)	1	1.9957e-10	142.56	LFK(1)LAEAAHLR	2	0.99184	2
	TRINITY_DN97208_c0_g2_m.31666	23	K	TRINITY_DN97208_c0_g2|g.31666 ORF TRINITY_DN97208_c0_g2|g.31666 TRINITY_DN97208_c0_g2_m.31666 type:complete len:569 (+) TRINITY_DN97208_c0_g2:170-1876(+)	1	0.000922215	84.368	GNVEEIK(1)R	2	0.6175	1
	TRINITY_DN97239_c2_g1_m.31720	61	K	TRINITY_DN97239_c2_g1|g.31720 ORF TRINITY_DN97239_c2_g1|g.31720 TRINITY_DN97239_c2_g1_m.31720 type:3prime_partial len:282 (+) TRINITY_DN97239_c2_g1:42-884(+)	1	8.19632e-07	103.87	DSYVGDEAQSK(1)R	2	-0.91187	1
	TRINITY_DN97282_c0_g1_m.31786	238	K	TRINITY_DN97282_c0_g1|g.31786 ORF TRINITY_DN97282_c0_g1|g.31786 TRINITY_DN97282_c0_g1_m.31786 type:complete len:617 (+) TRINITY_DN97282_c0_g1:152-2002(+)	1	1.15555e-08	126.48	LLK(1)DPLYLGLQQHR	3	-1.9827	1
	TRINITY_DN97282_c0_g1_m.31786	592	K	TRINITY_DN97282_c0_g1|g.31786 ORF TRINITY_DN97282_c0_g1|g.31786 TRINITY_DN97282_c0_g1_m.31786 type:complete len:617 (+) TRINITY_DN97282_c0_g1:152-2002(+)	1	1.5603e-09	148.76	LDK(1)EQTLEYVK	2	3.4401	1
	TRINITY_DN97282_c0_g1_m.31786	87	K	TRINITY_DN97282_c0_g1|g.31786 ORF TRINITY_DN97282_c0_g1|g.31786 TRINITY_DN97282_c0_g1_m.31786 type:complete len:617 (+) TRINITY_DN97282_c0_g1:152-2002(+)	1	0.00631383	88.35	FMLDMK(1)R	2	-2.4504	1
	TRINITY_DN97282_c0_g1_m.31786	443	K	TRINITY_DN97282_c0_g1|g.31786 ORF TRINITY_DN97282_c0_g1|g.31786 TRINITY_DN97282_c0_g1_m.31786 type:complete len:617 (+) TRINITY_DN97282_c0_g1:152-2002(+)	1	0.0023458	47.361	EVLEALK(1)DSTSTR	2	1.3066	1
	TRINITY_DN97282_c0_g1_m.31786	600	K	TRINITY_DN97282_c0_g1|g.31786 ORF TRINITY_DN97282_c0_g1|g.31786 TRINITY_DN97282_c0_g1_m.31786 type:complete len:617 (+) TRINITY_DN97282_c0_g1:152-2002(+)	1	1.20147e-09	148.76	LDKEQTLEYVK(1)K	2	-3.0316	1
	TRINITY_DN97282_c0_g1_m.31786	420	K	TRINITY_DN97282_c0_g1|g.31786 ORF TRINITY_DN97282_c0_g1|g.31786 TRINITY_DN97282_c0_g1_m.31786 type:complete len:617 (+) TRINITY_DN97282_c0_g1:152-2002(+)	1	4.05239e-06	68.42	VK(1)PDVLLGLSAVGGLFSK	2	1.9154	1
	TRINITY_DN97282_c0_g1_m.31786	105	K	TRINITY_DN97282_c0_g1|g.31786 ORF TRINITY_DN97282_c0_g1|g.31786 TRINITY_DN97282_c0_g1_m.31786 type:complete len:617 (+) TRINITY_DN97282_c0_g1:152-2002(+)	1	6.85257e-08	108.24	DGPSDPNSLAK(1)WR	2	9.2796	1
	TRINITY_DN97288_c0_g1_m.31794	163	K	TRINITY_DN97288_c0_g1|g.31794 ORF TRINITY_DN97288_c0_g1|g.31794 TRINITY_DN97288_c0_g1_m.31794 type:complete len:303 (+) TRINITY_DN97288_c0_g1:81-989(+)	1	6.33095e-07	110.14	VFGALK(1)GALDGGLDIPHSDK	3	0.96532	2
	TRINITY_DN97288_c0_g1_m.31794	261	K	TRINITY_DN97288_c0_g1|g.31794 ORF TRINITY_DN97288_c0_g1|g.31794 TRINITY_DN97288_c0_g1_m.31794 type:complete len:303 (+) TRINITY_DN97288_c0_g1:81-989(+)	1	0.0520961	42.835	EPPK(1)EHK	2	-1.3475	1
	TRINITY_DN97288_c0_g1_m.31794	196	K	TRINITY_DN97288_c0_g1|g.31794 ORF TRINITY_DN97288_c0_g1|g.31794 TRINITY_DN97288_c0_g1_m.31794 type:complete len:303 (+) TRINITY_DN97288_c0_g1:81-989(+)	1	0.000360108	47.57	K(1)YIFGGHVADYMR	2	-1.5854	1
	TRINITY_DN97288_c0_g1_m.31794	187	K	TRINITY_DN97288_c0_g1|g.31794 ORF TRINITY_DN97288_c0_g1|g.31794 TRINITY_DN97288_c0_g1_m.31794 type:complete len:303 (+) TRINITY_DN97288_c0_g1:81-989(+)	1	2.43381e-06	110.52	DDK(1)QLDAELHR	2	-1.5304	2
	TRINITY_DN97288_c0_g1_m.31794	48	K	TRINITY_DN97288_c0_g1|g.31794 ORF TRINITY_DN97288_c0_g1|g.31794 TRINITY_DN97288_c0_g1_m.31794 type:complete len:303 (+) TRINITY_DN97288_c0_g1:81-989(+)	1	0.00175259	109.11	YNTPK(1)YR	2	0.45795	1
	TRINITY_DN97288_c0_g1_m.31794	5	K	TRINITY_DN97288_c0_g1|g.31794 ORF TRINITY_DN97288_c0_g1|g.31794 TRINITY_DN97288_c0_g1_m.31794 type:complete len:303 (+) TRINITY_DN97288_c0_g1:81-989(+)	1	0.0241511	64.547	VFVK(1)AQK	2	-0.466	1
	TRINITY_DN97289_c0_g1_m.31796	240	K	TRINITY_DN97289_c0_g1|g.31796 ORF TRINITY_DN97289_c0_g1|g.31796 TRINITY_DN97289_c0_g1_m.31796 type:complete len:453 (+) TRINITY_DN97289_c0_g1:114-1472(+)	1	4.20301e-06	104.49	FLVDHGVLPLFEK(1)SLK	3	2.0914	1
	TRINITY_DN97289_c0_g1_m.31796	72	K	TRINITY_DN97289_c0_g1|g.31796 ORF TRINITY_DN97289_c0_g1|g.31796 TRINITY_DN97289_c0_g1_m.31796 type:complete len:453 (+) TRINITY_DN97289_c0_g1:114-1472(+)	1	2.54574e-08	115.04	LIVPVLK(1)VGSIIGR	2	0.49247	1
	TRINITY_DN97289_c0_g1_m.31796	213	K	TRINITY_DN97289_c0_g1|g.31796 ORF TRINITY_DN97289_c0_g1|g.31796 TRINITY_DN97289_c0_g1_m.31796 type:complete len:453 (+) TRINITY_DN97289_c0_g1:114-1472(+)	1	0.00742137	60	VVDIHGETLK(1)VLK	2	-4.4232	1
	TRINITY_DN97347_c0_g1_m.31886	276	K	TRINITY_DN97347_c0_g1|g.31886 ORF TRINITY_DN97347_c0_g1|g.31886 TRINITY_DN97347_c0_g1_m.31886 type:complete len:368 (+) TRINITY_DN97347_c0_g1:115-1218(+)	1	0.000326256	54.199	HDIVPLIFLLK(1)TQGK	3	1.7038	1
	TRINITY_DN97379_c1_g1_m.31931	294	K	TRINITY_DN97379_c1_g1|g.31931 ORF TRINITY_DN97379_c1_g1|g.31931 TRINITY_DN97379_c1_g1_m.31931 type:5prime_partial len:376 (+) TRINITY_DN97379_c1_g1:2-1129(+)	1	2.42356e-06	97.084	IIAASSGGMK(1)ADDVAK	2	-0.66059	1
	TRINITY_DN97379_c5_g2_m.31932	70	K	TRINITY_DN97379_c5_g2|g.31932 ORF TRINITY_DN97379_c5_g2|g.31932 TRINITY_DN97379_c5_g2_m.31932 type:5prime_partial len:152 (+) TRINITY_DN97379_c5_g2:2-457(+)	1	1.33595e-09	117.41	IIAGSSGGMK(1)ADDVAK	2	-2.5188	1
	TRINITY_DN97439_c3_g2_m.32022	169	K	TRINITY_DN97439_c3_g2|g.32022 ORF TRINITY_DN97439_c3_g2|g.32022 TRINITY_DN97439_c3_g2_m.32022 type:complete len:643 (+) TRINITY_DN97439_c3_g2:325-2253(+)	1	0.0418625	57.293	LTK(1)DNNITTGK	2	1.9523	1
	TRINITY_DN97496_c0_g1_m.32112	205	K	TRINITY_DN97496_c0_g1|g.32112 ORF TRINITY_DN97496_c0_g1|g.32112 TRINITY_DN97496_c0_g1_m.32112 type:complete len:370 (+) TRINITY_DN97496_c0_g1:88-1197(+)	1	0.00107468	72.038	YPNLK(1)VVNFR	2	-2.0549	1
	TRINITY_DN97496_c0_g1_m.32112	125	K	TRINITY_DN97496_c0_g1|g.32112 ORF TRINITY_DN97496_c0_g1|g.32112 TRINITY_DN97496_c0_g1_m.32112 type:complete len:370 (+) TRINITY_DN97496_c0_g1:88-1197(+)	1	0.000629947	46.358	GLFTK(1)EIDEALLEGK	2	0.90297	1
	TRINITY_DN97560_c0_g2_m.32208	118	K	TRINITY_DN97560_c0_g2|g.32208 ORF TRINITY_DN97560_c0_g2|g.32208 TRINITY_DN97560_c0_g2_m.32208 type:5prime_partial len:189 (+) TRINITY_DN97560_c0_g2:1-567(+)	1	0.0644059	40.203	AK(1)AAGVLR	2	-3.0989	1
	TRINITY_DN97563_c0_g1_m.32213	354	K	TRINITY_DN97563_c0_g1|g.32213 ORF TRINITY_DN97563_c0_g1|g.32213 TRINITY_DN97563_c0_g1_m.32213 type:complete len:502 (+) TRINITY_DN97563_c0_g1:584-2089(+)	1	0.00288513	81.32	FLSLK(1)PVR	2	-1.4193	1
	TRINITY_DN97563_c0_g1_m.32213	444	K	TRINITY_DN97563_c0_g1|g.32213 ORF TRINITY_DN97563_c0_g1|g.32213 TRINITY_DN97563_c0_g1_m.32213 type:complete len:502 (+) TRINITY_DN97563_c0_g1:584-2089(+)	0.998673	4.3116e-13	70.793	WSGQEAFGSSSEK(0.001)PFTVDSK(0.999)DAGVLK	3	4.268	1
	TRINITY_DN97585_c0_g1_m.32246	59	K	TRINITY_DN97585_c0_g1|g.32246 ORF TRINITY_DN97585_c0_g1|g.32246 TRINITY_DN97585_c0_g1_m.32246 type:complete len:276 (+) TRINITY_DN97585_c0_g1:154-981(+)	1	4.77127e-09	183.7	KNDFILGELQSQLK(1)SK	3	-1.9905	2
	TRINITY_DN97585_c0_g1_m.32246	11	K	TRINITY_DN97585_c0_g1|g.32246 ORF TRINITY_DN97585_c0_g1|g.32246 TRINITY_DN97585_c0_g1_m.32246 type:complete len:276 (+) TRINITY_DN97585_c0_g1:154-981(+)	1	0.00201857	90.263	GPGLYSEIGK(1)K	2	-1.2223	1
	TRINITY_DN97585_c0_g1_m.32246	101	K	TRINITY_DN97585_c0_g1|g.32246 ORF TRINITY_DN97585_c0_g1|g.32246 TRINITY_DN97585_c0_g1_m.32246 type:complete len:276 (+) TRINITY_DN97585_c0_g1:154-981(+)	1	0.014072	60	TIISFVLPDQK(1)SGK	2	-0.52213	1
	TRINITY_DN97585_c0_g1_m.32246	61	K	TRINITY_DN97585_c0_g1|g.32246 ORF TRINITY_DN97585_c0_g1|g.32246 TRINITY_DN97585_c0_g1_m.32246 type:complete len:276 (+) TRINITY_DN97585_c0_g1:154-981(+)	1	0.0140849	69.915	SK(1)NVTVDLK	2	-0.24053	1
	TRINITY_DN97585_c0_g1_m.32246	19	K	TRINITY_DN97585_c0_g1|g.32246 ORF TRINITY_DN97585_c0_g1|g.32246 TRINITY_DN97585_c0_g1_m.32246 type:complete len:276 (+) TRINITY_DN97585_c0_g1:154-981(+)	1	1.7566e-12	166.65	DLLYK(1)DFLTDQK	2	2.5478	1
	TRINITY_DN97585_c0_g1_m.32246	235	K	TRINITY_DN97585_c0_g1|g.32246 ORF TRINITY_DN97585_c0_g1|g.32246 TRINITY_DN97585_c0_g1_m.32246 type:complete len:276 (+) TRINITY_DN97585_c0_g1:154-981(+)	1	1.2431e-13	147.02	FNNYGK(1)ASALIQHQWR	2	-1.0806	2
	TRINITY_DN97585_c0_g1_m.32246	247	K	TRINITY_DN97585_c0_g1|g.32246 ORF TRINITY_DN97585_c0_g1|g.32246 TRINITY_DN97585_c0_g1_m.32246 type:complete len:276 (+) TRINITY_DN97585_c0_g1:154-981(+)	1	0.000120265	94.507	PK(1)SLITLSAEVDTK	2	-4.8312	1
	TRINITY_DN97637_c0_g1_m.32320	75	K	TRINITY_DN97637_c0_g1|g.32320 ORF TRINITY_DN97637_c0_g1|g.32320 TRINITY_DN97637_c0_g1_m.32320 type:5prime_partial len:424 (+) TRINITY_DN97637_c0_g1:1-1272(+)	1	0.0134363	65.404	FGSK(1)SGEFK	2	-0.23349	1
	TRINITY_DN97637_c0_g1_m.32320	264	K	TRINITY_DN97637_c0_g1|g.32320 ORF TRINITY_DN97637_c0_g1|g.32320 TRINITY_DN97637_c0_g1_m.32320 type:5prime_partial len:424 (+) TRINITY_DN97637_c0_g1:1-1272(+)	1	0.00542615	84.699	LQK(1)EYMR	2	1.3562	1
	TRINITY_DN97668_c1_g1_m.32359	344	K	TRINITY_DN97668_c1_g1|g.32359 ORF TRINITY_DN97668_c1_g1|g.32359 TRINITY_DN97668_c1_g1_m.32359 type:complete len:402 (+) TRINITY_DN97668_c1_g1:285-1490(+)	1	0.0143978	54.056	VAGK(1)VFR	2	-1.1741	1
	TRINITY_DN97689_c0_g1_m.32389	180	K	TRINITY_DN97689_c0_g1|g.32389 ORF TRINITY_DN97689_c0_g1|g.32389 TRINITY_DN97689_c0_g1_m.32389 type:complete len:254 (+) TRINITY_DN97689_c0_g1:130-891(+)	0.999965	0.00048657	110.44	WVTFIK(1)NSPKPPPVR	2	-2.4254	1
	TRINITY_DN97689_c0_g1_m.32389	142	K	TRINITY_DN97689_c0_g1|g.32389 ORF TRINITY_DN97689_c0_g1|g.32389 TRINITY_DN97689_c0_g1_m.32389 type:complete len:254 (+) TRINITY_DN97689_c0_g1:130-891(+)	1	3.12222e-11	153.25	GVVEISPQTK(1)FPR	2	3.685	1
	TRINITY_DN97745_c0_g1_m.32480	371	K	TRINITY_DN97745_c0_g1|g.32480 ORF TRINITY_DN97745_c0_g1|g.32480 TRINITY_DN97745_c0_g1_m.32480 type:5prime_partial len:527 (+) TRINITY_DN97745_c0_g1:1-1581(+)	1	0.0179373	64.547	TYAK(1)QVK	2	0.19216	1
	TRINITY_DN97745_c0_g1_m.32480	483	K	TRINITY_DN97745_c0_g1|g.32480 ORF TRINITY_DN97745_c0_g1|g.32480 TRINITY_DN97745_c0_g1_m.32480 type:5prime_partial len:527 (+) TRINITY_DN97745_c0_g1:1-1581(+)	1	0.0384032	63.301	EHGK(1)LLK	2	0.31998	1
	TRINITY_DN97745_c0_g1_m.32480	374	K	TRINITY_DN97745_c0_g1|g.32480 ORF TRINITY_DN97745_c0_g1|g.32480 TRINITY_DN97745_c0_g1_m.32480 type:5prime_partial len:527 (+) TRINITY_DN97745_c0_g1:1-1581(+)	1	0.000401714	106	QVK(1)ANAAALGNYLINK	2	-3.3317	1
	TRINITY_DN97745_c0_g1_m.32480	502	K	TRINITY_DN97745_c0_g1|g.32480 ORF TRINITY_DN97745_c0_g1|g.32480 TRINITY_DN97745_c0_g1_m.32480 type:5prime_partial len:527 (+) TRINITY_DN97745_c0_g1:1-1581(+)	1	0.00611533	63.212	DIENLK(1)ATVEK	2	-0.018119	1
	TRINITY_DN97745_c0_g1_m.32480	417	K	TRINITY_DN97745_c0_g1|g.32480 ORF TRINITY_DN97745_c0_g1|g.32480 TRINITY_DN97745_c0_g1_m.32480 type:5prime_partial len:527 (+) TRINITY_DN97745_c0_g1:1-1581(+)	1	2.83541e-05	90.156	VEK(1)VCDLCNITLNK	2	-1.4311	2
	TRINITY_DN97745_c0_g1_m.32480	490	K	TRINITY_DN97745_c0_g1|g.32480 ORF TRINITY_DN97745_c0_g1|g.32480 TRINITY_DN97745_c0_g1_m.32480 type:5prime_partial len:527 (+) TRINITY_DN97745_c0_g1:1-1581(+)	1	0.0160813	69.716	DFNK(1)GLANNK	2	2.1737	1
	TRINITY_DN97813_c0_g1_m.32590	335	K	TRINITY_DN97813_c0_g1|g.32590 ORF TRINITY_DN97813_c0_g1|g.32590 TRINITY_DN97813_c0_g1_m.32590 type:complete len:359 (+) TRINITY_DN97813_c0_g1:134-1210(+)	1	0.00135921	88.734	SLAK(1)EAGFSDFK	2	3.7121	1
	TRINITY_DN97813_c0_g1_m.32590	216	K	TRINITY_DN97813_c0_g1|g.32590 ORF TRINITY_DN97813_c0_g1|g.32590 TRINITY_DN97813_c0_g1_m.32590 type:complete len:359 (+) TRINITY_DN97813_c0_g1:134-1210(+)	1	0.0091571	76.605	ITAK(1)YTGIR	2	-0.20933	1
	TRINITY_DN97813_c0_g1_m.32590	323	K	TRINITY_DN97813_c0_g1|g.32590 ORF TRINITY_DN97813_c0_g1|g.32590 TRINITY_DN97813_c0_g1_m.32590 type:complete len:359 (+) TRINITY_DN97813_c0_g1:134-1210(+)	1	2.45261e-06	58.045	GVFHVDLIMLAHNPGGK(1)ER	3	-1.1469	1
	TRINITY_DN97835_c0_g1_m.32618	656	K	TRINITY_DN97835_c0_g1|g.32618 ORF TRINITY_DN97835_c0_g1|g.32618 TRINITY_DN97835_c0_g1_m.32618 type:complete len:665 (+) TRINITY_DN97835_c0_g1:77-2071(+)	1	0.0181935	69.093	PLLK(1)QQLR	2	-1.4059	1
	TRINITY_DN97835_c0_g1_m.32618	263	K	TRINITY_DN97835_c0_g1|g.32618 ORF TRINITY_DN97835_c0_g1|g.32618 TRINITY_DN97835_c0_g1_m.32618 type:complete len:665 (+) TRINITY_DN97835_c0_g1:77-2071(+)	1	0.0148391	42.075	LSQVTK(1)EGK	2	0.91855	1
	TRINITY_DN97843_c0_g1_m.32632	319	K	TRINITY_DN97843_c0_g1|g.32632 ORF TRINITY_DN97843_c0_g1|g.32632 TRINITY_DN97843_c0_g1_m.32632 type:complete len:457 (+) TRINITY_DN97843_c0_g1:99-1469(+)	1	0.00381244	91.245	VGALSIVCK(1)SSDVAAR	2	-2.1426	1
	TRINITY_DN97843_c0_g1_m.32632	118	K	TRINITY_DN97843_c0_g1|g.32632 ORF TRINITY_DN97843_c0_g1|g.32632 TRINITY_DN97843_c0_g1_m.32632 type:complete len:457 (+) TRINITY_DN97843_c0_g1:99-1469(+)	1	2.7495e-13	170.22	VK(1)EYLPITGLADFNK	2	0.3858	1
	TRINITY_DN97843_c0_g1_m.32632	96	K	TRINITY_DN97843_c0_g1|g.32632 ORF TRINITY_DN97843_c0_g1|g.32632 TRINITY_DN97843_c0_g1_m.32632 type:complete len:457 (+) TRINITY_DN97843_c0_g1:99-1469(+)	1	0.000429438	71.066	TEEGK(1)PLVLNVVR	2	-0.10733	1
	TRINITY_DN97843_c0_g1_m.32632	135	K	TRINITY_DN97843_c0_g1|g.32632 ORF TRINITY_DN97843_c0_g1|g.32632 TRINITY_DN97843_c0_g1_m.32632 type:complete len:457 (+) TRINITY_DN97843_c0_g1:99-1469(+)	1	0.0111854	50.641	LSAK(1)LIFGADSPAIR	2	1.0819	1
	TRINITY_DN97843_c0_g1_m.32632	82	K	TRINITY_DN97843_c0_g1|g.32632 ORF TRINITY_DN97843_c0_g1|g.32632 TRINITY_DN97843_c0_g1_m.32632 type:complete len:457 (+) TRINITY_DN97843_c0_g1:99-1469(+)	1	1.7547e-05	58.313	DPSPVK(1)VNLGVGAYR	2	1.0572	1
	TRINITY_DN98000_c1_g1_m.32899	370	K	TRINITY_DN98000_c1_g1|g.32899 ORF TRINITY_DN98000_c1_g1|g.32899 TRINITY_DN98000_c1_g1_m.32899 type:5prime_partial len:377 (+) TRINITY_DN98000_c1_g1:1-1131(+)	1	0.00139352	85.622	IGAAMLDIFK(1)QR	2	0.12264	1
	TRINITY_DN98000_c1_g1_m.32899	337	K	TRINITY_DN98000_c1_g1|g.32899 ORF TRINITY_DN98000_c1_g1|g.32899 TRINITY_DN98000_c1_g1_m.32899 type:5prime_partial len:377 (+) TRINITY_DN98000_c1_g1:1-1131(+)	1	0.0241412	51.569	MGHAGAIVSGGK(1)GTAQDK	3	1.0298	1
	TRINITY_DN98000_c1_g1_m.32899	188	K	TRINITY_DN98000_c1_g1|g.32899 ORF TRINITY_DN98000_c1_g1|g.32899 TRINITY_DN98000_c1_g1_m.32899 type:5prime_partial len:377 (+) TRINITY_DN98000_c1_g1:1-1131(+)	1	0.00429014	92.319	VK(1)AALNR	2	0.087979	1
	TRINITY_DN98000_c1_g1_m.32899	140	K	TRINITY_DN98000_c1_g1|g.32899 ORF TRINITY_DN98000_c1_g1|g.32899 TRINITY_DN98000_c1_g1_m.32899 type:5prime_partial len:377 (+) TRINITY_DN98000_c1_g1:1-1131(+)	1	1.06785e-11	86.838	KGGTEHLGLPVFNSVAEAK(1)AETK	3	1.8504	1
	TRINITY_DN98020_c0_g1_m.32928	221	K	TRINITY_DN98020_c0_g1|g.32928 ORF TRINITY_DN98020_c0_g1|g.32928 TRINITY_DN98020_c0_g1_m.32928 type:5prime_partial len:902 (+) TRINITY_DN98020_c0_g1:1-2706(+)	1	0.000662029	76.563	GDNVEGMLK(1)EHDR	2	-0.081464	1
	TRINITY_DN98020_c0_g1_m.32928	386	K	TRINITY_DN98020_c0_g1|g.32928 ORF TRINITY_DN98020_c0_g1|g.32928 TRINITY_DN98020_c0_g1_m.32928 type:5prime_partial len:902 (+) TRINITY_DN98020_c0_g1:1-2706(+)	1	0.0065568	75.243	YDK(1)LAWR	2	-0.61636	1
	TRINITY_DN98032_c0_g2_m.32943	95	K	TRINITY_DN98032_c0_g2|g.32943 ORF TRINITY_DN98032_c0_g2|g.32943 TRINITY_DN98032_c0_g2_m.32943 type:complete len:258 (+) TRINITY_DN98032_c0_g2:150-923(+)	1	0.000274221	99.305	DPAFLK(1)WYR	2	0.36949	1
	TRINITY_DN98032_c0_g2_m.32943	229	K	TRINITY_DN98032_c0_g2|g.32943 ORF TRINITY_DN98032_c0_g2|g.32943 TRINITY_DN98032_c0_g2_m.32943 type:complete len:258 (+) TRINITY_DN98032_c0_g2:150-923(+)	1	0.000330588	102.46	LAEIK(1)HAR	2	0.4477	1
	TRINITY_DN98032_c0_g2_m.32943	224	K	TRINITY_DN98032_c0_g2|g.32943 ORF TRINITY_DN98032_c0_g2|g.32943 TRINITY_DN98032_c0_g2_m.32943 type:complete len:258 (+) TRINITY_DN98032_c0_g2:150-923(+)	1	0.00499654	82.716	LK(1)LAEIK	2	1.3838	1
	TRINITY_DN98032_c0_g2_m.32943	54	K	TRINITY_DN98032_c0_g2|g.32943 ORF TRINITY_DN98032_c0_g2|g.32943 TRINITY_DN98032_c0_g2_m.32943 type:complete len:258 (+) TRINITY_DN98032_c0_g2:150-923(+)	1	0.000920033	98.009	K(1)SWLPGVR	2	-1.406	1
	TRINITY_DN98036_c1_g1_m.32952	370	K	TRINITY_DN98036_c1_g1|g.32952 ORF TRINITY_DN98036_c1_g1|g.32952 TRINITY_DN98036_c1_g1_m.32952 type:complete len:533 (+) TRINITY_DN98036_c1_g1:267-1865(+)	1	0.0156654	61.48	DK(1)IFEFGQK	2	-1.2542	1
	TRINITY_DN98036_c1_g1_m.32952	220	K	TRINITY_DN98036_c1_g1|g.32952 ORF TRINITY_DN98036_c1_g1|g.32952 TRINITY_DN98036_c1_g1_m.32952 type:complete len:533 (+) TRINITY_DN98036_c1_g1:267-1865(+)	1	1.47358e-12	141.44	ELAQQNQAVLLK(1)MGR	2	-3.2064	1
	TRINITY_DN98057_c1_g1_m.32975	184	K	TRINITY_DN98057_c1_g1|g.32975 ORF TRINITY_DN98057_c1_g1|g.32975 TRINITY_DN98057_c1_g1_m.32975 type:complete len:274 (+) TRINITY_DN98057_c1_g1:129-950(+)	1	0.000453951	79.889	YPLISDVTK(1)SVSR	2	0.34488	1
	TRINITY_DN98107_c0_g1_m.33063	391	K	TRINITY_DN98107_c0_g1|g.33063 ORF TRINITY_DN98107_c0_g1|g.33063 TRINITY_DN98107_c0_g1_m.33063 type:complete len:723 (+) TRINITY_DN98107_c0_g1:116-2284(+)	1	8.1453e-05	108.4	EK(1)EISLSGEHVR	2	-1.6263	1
	TRINITY_DN98107_c0_g1_m.33063	422	K	TRINITY_DN98107_c0_g1|g.33063 ORF TRINITY_DN98107_c0_g1|g.33063 TRINITY_DN98107_c0_g1_m.33063 type:complete len:723 (+) TRINITY_DN98107_c0_g1:116-2284(+)	1	0.00129719	58.476	VPSPEFEGQTK(1)TR	2	-1.533	1
	TRINITY_DN98189_c4_g7_m.33165	305	K	TRINITY_DN98189_c4_g7|g.33165 ORF TRINITY_DN98189_c4_g7|g.33165 TRINITY_DN98189_c4_g7_m.33165 type:complete len:599 (+) TRINITY_DN98189_c4_g7:277-2073(+)	1	0.00983729	46.068	LSEALYVAEQK(1)AR	2	-0.45934	1
	TRINITY_DN98226_c0_g1_m.33223	136	K	TRINITY_DN98226_c0_g1|g.33223 ORF TRINITY_DN98226_c0_g1|g.33223 TRINITY_DN98226_c0_g1_m.33223 type:5prime_partial len:393 (+) TRINITY_DN98226_c0_g1:3-1181(+)	1	1.05888e-05	57.62	NISYK(1)GVTDLVTDTDK	2	1.1056	1
	TRINITY_DN98228_c0_g1_m.33236	384	K	TRINITY_DN98228_c0_g1|g.33236 ORF TRINITY_DN98228_c0_g1|g.33236 TRINITY_DN98228_c0_g1_m.33236 type:complete len:409 (+) TRINITY_DN98228_c0_g1:159-1385(+)	1	1.78119e-05	107.6	DAK(1)LYEIGAGTSEIR	2	2.0561	1
	TRINITY_DN98303_c3_g1_m.33397	203	K	TRINITY_DN98303_c3_g1|g.33397 ORF TRINITY_DN98303_c3_g1|g.33397 TRINITY_DN98303_c3_g1_m.33397 type:complete len:702 (+) TRINITY_DN98303_c3_g1:111-2216(+)	1	0.00296337	50.834	QYEHFNK(1)VAK	2	-2.2382	1
	TRINITY_DN98358_c0_g1_m.33487	397	K	TRINITY_DN98358_c0_g1|g.33487 ORF TRINITY_DN98358_c0_g1|g.33487 TRINITY_DN98358_c0_g1_m.33487 type:complete len:537 (+) TRINITY_DN98358_c0_g1:184-1794(+)	1	0.0276214	52.201	NIAEHVQAISPK(1)FQEGIK	3	-3.8589	1
	TRINITY_DN98358_c0_g1_m.33487	283	K	TRINITY_DN98358_c0_g1|g.33487 ORF TRINITY_DN98358_c0_g1|g.33487 TRINITY_DN98358_c0_g1_m.33487 type:complete len:537 (+) TRINITY_DN98358_c0_g1:184-1794(+)	1	0.00222977	62.271	TYFEK(1)IQAVVK	2	-0.43957	1
	TRINITY_DN98358_c0_g1_m.33487	138	K	TRINITY_DN98358_c0_g1|g.33487 ORF TRINITY_DN98358_c0_g1|g.33487 TRINITY_DN98358_c0_g1_m.33487 type:complete len:537 (+) TRINITY_DN98358_c0_g1:184-1794(+)	0.998844	0.00154726	60.324	TTK(0.001)PSLDLAK(0.999)DLLEIFTVR	3	-1.0223	1
	TRINITY_DN98358_c0_g1_m.33487	117	K	TRINITY_DN98358_c0_g1|g.33487 ORF TRINITY_DN98358_c0_g1|g.33487 TRINITY_DN98358_c0_g1_m.33487 type:complete len:537 (+) TRINITY_DN98358_c0_g1:184-1794(+)	1	1.81803e-09	166.66	LVAAATEQLK(1)K	2	-0.96761	1
	TRINITY_DN98401_c1_g1_m.33568	75	K	TRINITY_DN98401_c1_g1|g.33568 ORF TRINITY_DN98401_c1_g1|g.33568 TRINITY_DN98401_c1_g1_m.33568 type:complete len:471 (+) TRINITY_DN98401_c1_g1:174-1586(+)	1	0.0695982	42.075	VNAVK(1)PSK	2	1.8772	1
	TRINITY_DN98401_c1_g1_m.33568	218	K	TRINITY_DN98401_c1_g1|g.33568 ORF TRINITY_DN98401_c1_g1|g.33568 TRINITY_DN98401_c1_g1_m.33568 type:complete len:471 (+) TRINITY_DN98401_c1_g1:174-1586(+)	1	0.0281225	52.591	PK(1)DLASK	2	0.92356	1
	TRINITY_DN98402_c0_g1_m.33569	16	K	TRINITY_DN98402_c0_g1|g.33569 ORF TRINITY_DN98402_c0_g1|g.33569 TRINITY_DN98402_c0_g1_m.33569 type:complete len:991 (+) TRINITY_DN98402_c0_g1:240-3212(+)	1	0.00776671	46.768	VK(1)AVPSGDTLVIMGSTK	2	-0.91501	1
	TRINITY_DN98402_c0_g1_m.33569	346	K	TRINITY_DN98402_c0_g1|g.33569 ORF TRINITY_DN98402_c0_g1|g.33569 TRINITY_DN98402_c0_g1_m.33569 type:complete len:991 (+) TRINITY_DN98402_c0_g1:240-3212(+)	1	0.0505308	58.916	LK(1)TADLQAK	2	-0.038338	1
	TRINITY_DN98402_c0_g1_m.33569	705	K	TRINITY_DN98402_c0_g1|g.33569 ORF TRINITY_DN98402_c0_g1|g.33569 TRINITY_DN98402_c0_g1_m.33569 type:complete len:991 (+) TRINITY_DN98402_c0_g1:240-3212(+)	1	4.49625e-09	106.58	IPDSQILSQAEQSAK(1)LQK	2	-1.206	1
	TRINITY_DN98402_c0_g1_m.33569	277	K	TRINITY_DN98402_c0_g1|g.33569 ORF TRINITY_DN98402_c0_g1|g.33569 TRINITY_DN98402_c0_g1_m.33569 type:complete len:991 (+) TRINITY_DN98402_c0_g1:240-3212(+)	1	0.000338961	92.428	EAK(1)HFTEIR	2	-0.15393	1
	TRINITY_DN98412_c0_g1_m.33585	228	K	TRINITY_DN98412_c0_g1|g.33585 ORF TRINITY_DN98412_c0_g1|g.33585 TRINITY_DN98412_c0_g1_m.33585 type:5prime_partial len:459 (+) TRINITY_DN98412_c0_g1:1-1377(+)	1	9.97141e-18	169.57	EEQDQAAVVSHK(1)R	2	-2.2375	1
	TRINITY_DN98448_c0_g2_m.33632	548	K	TRINITY_DN98448_c0_g2|g.33632 ORF TRINITY_DN98448_c0_g2|g.33632 TRINITY_DN98448_c0_g2_m.33632 type:complete len:713 (+) TRINITY_DN98448_c0_g2:188-2326(+)	1	0.0580962	69.093	LILDMK(1)R	2	-2.8403	1
	TRINITY_DN98557_c0_g1_m.33797	91	K	TRINITY_DN98557_c0_g1|g.33797 ORF TRINITY_DN98557_c0_g1|g.33797 TRINITY_DN98557_c0_g1_m.33797 type:complete len:274 (+) TRINITY_DN98557_c0_g1:95-916(+)	1	1.02904e-08	163.09	NPTSK(1)IIYDEHNHER	2	-4.7006	2
	TRINITY_DN98558_c0_g1_m.33798	526	K	TRINITY_DN98558_c0_g1|g.33798 ORF TRINITY_DN98558_c0_g1|g.33798 TRINITY_DN98558_c0_g1_m.33798 type:5prime_partial len:804 (+) TRINITY_DN98558_c0_g1:1-2412(+)	1	1.24902e-05	80.379	VEK(1)TPVGNQGVSSGSK	2	-0.78664	1
	TRINITY_DN98558_c0_g1_m.33798	518	K	TRINITY_DN98558_c0_g1|g.33798 ORF TRINITY_DN98558_c0_g1|g.33798 TRINITY_DN98558_c0_g1_m.33798 type:5prime_partial len:804 (+) TRINITY_DN98558_c0_g1:1-2412(+)	1	0.0574065	56.202	AAPVDQTVK(1)K	2	-0.04897	1
	TRINITY_DN98558_c0_g1_m.33798	579	K	TRINITY_DN98558_c0_g1|g.33798 ORF TRINITY_DN98558_c0_g1|g.33798 TRINITY_DN98558_c0_g1_m.33798 type:5prime_partial len:804 (+) TRINITY_DN98558_c0_g1:1-2412(+)	1	4.17033e-05	62.327	FDDGHFK(1)GFGHVEFATAEAAQK	3	2.6444	2
	TRINITY_DN98577_c3_g1_m.33821	190	K	TRINITY_DN98577_c3_g1|g.33821 ORF TRINITY_DN98577_c3_g1|g.33821 TRINITY_DN98577_c3_g1_m.33821 type:complete len:344 (+) TRINITY_DN98577_c3_g1:189-1220(+)	1	0.00108634	72.327	VEPALTEELK(1)DALVK	2	2.7841	1
	TRINITY_DN98577_c3_g1_m.33821	289	K	TRINITY_DN98577_c3_g1|g.33821 ORF TRINITY_DN98577_c3_g1|g.33821 TRINITY_DN98577_c3_g1_m.33821 type:complete len:344 (+) TRINITY_DN98577_c3_g1:189-1220(+)	1	0.0146249	62.88	LIVK(1)EAPR	2	0.68397	1
	TRINITY_DN98577_c3_g1_m.33821	169	K	TRINITY_DN98577_c3_g1|g.33821 ORF TRINITY_DN98577_c3_g1|g.33821 TRINITY_DN98577_c3_g1_m.33821 type:complete len:344 (+) TRINITY_DN98577_c3_g1:189-1220(+)	1	4.39409e-12	104.49	EVK(1)EVGSDGQEVTK	2	-1.178	1
	TRINITY_DN98681_c0_g1_m.33978	246	K	TRINITY_DN98681_c0_g1|g.33978 ORF TRINITY_DN98681_c0_g1|g.33978 TRINITY_DN98681_c0_g1_m.33978 type:complete len:460 (+) TRINITY_DN98681_c0_g1:111-1490(+)	1	0.00556869	65.404	IIDPK(1)SGAEK	2	-0.6768	1
	TRINITY_DN98681_c0_g1_m.33978	309	K	TRINITY_DN98681_c0_g1|g.33978 ORF TRINITY_DN98681_c0_g1|g.33978 TRINITY_DN98681_c0_g1_m.33978 type:complete len:460 (+) TRINITY_DN98681_c0_g1:111-1490(+)	1	0.00177023	76.605	K(1)GFPILGVFR	2	1.135	1
	TRINITY_DN98681_c0_g1_m.33978	241	K	TRINITY_DN98681_c0_g1|g.33978 ORF TRINITY_DN98681_c0_g1|g.33978 TRINITY_DN98681_c0_g1_m.33978 type:complete len:460 (+) TRINITY_DN98681_c0_g1:111-1490(+)	1	0.000159658	83.061	FKDEIIPVTTK(1)IIDPK	3	-3.3176	2
	TRINITY_DN98681_c0_g1_m.33978	232	K	TRINITY_DN98681_c0_g1|g.33978 ORF TRINITY_DN98681_c0_g1|g.33978 TRINITY_DN98681_c0_g1_m.33978 type:complete len:460 (+) TRINITY_DN98681_c0_g1:111-1490(+)	1	0.000125667	96.946	FK(1)DEIIPVTTK	2	2.6367	1
	TRINITY_DN98681_c0_g1_m.33978	220	K	TRINITY_DN98681_c0_g1|g.33978 ORF TRINITY_DN98681_c0_g1|g.33978 TRINITY_DN98681_c0_g1_m.33978 type:complete len:460 (+) TRINITY_DN98681_c0_g1:111-1490(+)	1	2.16732e-78	317.55	QEQDQAAVESHK(1)K	2	-3.2939	2
	TRINITY_DN98713_c0_g2_m.34024	180	K	TRINITY_DN98713_c0_g2|g.34024 ORF TRINITY_DN98713_c0_g2|g.34024 TRINITY_DN98713_c0_g2_m.34024 type:complete len:233 (+) TRINITY_DN98713_c0_g2:203-901(+)	0.999992	0.0550703	51.829	KTEGEFFEADK(1)EEK	2	-2.4402	1
	TRINITY_DN98713_c0_g2_m.34024	203	K	TRINITY_DN98713_c0_g2|g.34024 ORF TRINITY_DN98713_c0_g2|g.34024 TRINITY_DN98713_c0_g2_m.34024 type:complete len:233 (+) TRINITY_DN98713_c0_g2:203-901(+)	1	0.000361599	66.509	AVDDPLLK(1)AVDAVPDLR	2	0.31279	1
	TRINITY_DN98735_c0_g1_m.34067	98	K	TRINITY_DN98735_c0_g1|g.34067 ORF TRINITY_DN98735_c0_g1|g.34067 TRINITY_DN98735_c0_g1_m.34067 type:complete len:604 (+) TRINITY_DN98735_c0_g1:183-1994(+)	1	0.062691	51.43	EEIPIYK(1)FR	2	-4.6186	1
	TRINITY_DN98799_c0_g1_m.34171	195	K	TRINITY_DN98799_c0_g1|g.34171 ORF TRINITY_DN98799_c0_g1|g.34171 TRINITY_DN98799_c0_g1_m.34171 type:complete len:532 (+) TRINITY_DN98799_c0_g1:48-1643(+)	1	1.78439e-05	126.21	TEEVLQAK(1)ATLEAK	2	-0.6035	1
	TRINITY_DN98803_c0_g1_m.34176	216	K	TRINITY_DN98803_c0_g1|g.34176 ORF TRINITY_DN98803_c0_g1|g.34176 TRINITY_DN98803_c0_g1_m.34176 type:complete len:364 (+) TRINITY_DN98803_c0_g1:172-1263(+)	1	0.0170331	60.892	LPANHK(1)GAVVR	2	-0.24145	1
	TRINITY_DN98929_c0_g1_m.34378	162	K	TRINITY_DN98929_c0_g1|g.34378 ORF TRINITY_DN98929_c0_g1|g.34378 TRINITY_DN98929_c0_g1_m.34378 type:complete len:418 (+) TRINITY_DN98929_c0_g1:362-1615(+)	1	0.0173191	52.837	DVGVK(1)SFVLFPK	2	-0.3724	1
	TRINITY_DN98929_c0_g1_m.34378	169	K	TRINITY_DN98929_c0_g1|g.34378 ORF TRINITY_DN98929_c0_g1|g.34378 TRINITY_DN98929_c0_g1_m.34378 type:complete len:418 (+) TRINITY_DN98929_c0_g1:362-1615(+)	1	0.00122277	52.837	SFVLFPK(1)IPDALK	2	-0.94042	1
	TRINITY_DN98929_c0_g1_m.34378	82	K	TRINITY_DN98929_c0_g1|g.34378 ORF TRINITY_DN98929_c0_g1|g.34378 TRINITY_DN98929_c0_g1_m.34378 type:complete len:418 (+) TRINITY_DN98929_c0_g1:362-1615(+)	1	0.00324687	60.547	PAGPK(1)GTPVVK	2	-0.33254	1
	TRINITY_DN99001_c0_g1_m.34516	189	K	TRINITY_DN99001_c0_g1|g.34516 ORF TRINITY_DN99001_c0_g1|g.34516 TRINITY_DN99001_c0_g1_m.34516 type:complete len:542 (+) TRINITY_DN99001_c0_g1:77-1702(+)	1	0.0369257	40.533	AVQSPK(1)ACVTR	2	-1.4766	1
	TRINITY_DN99009_c0_g1_m.34525	135	K	TRINITY_DN99009_c0_g1|g.34525 ORF TRINITY_DN99009_c0_g1|g.34525 TRINITY_DN99009_c0_g1_m.34525 type:complete len:400 (+) TRINITY_DN99009_c0_g1:272-1471(+)	1	1.33531e-07	99.276	IIWNK(1)DVEVAQLK	2	1.1396	1
	TRINITY_DN99009_c0_g1_m.34525	143	K	TRINITY_DN99009_c0_g1|g.34525 ORF TRINITY_DN99009_c0_g1|g.34525 TRINITY_DN99009_c0_g1_m.34525 type:complete len:400 (+) TRINITY_DN99009_c0_g1:272-1471(+)	1	0.000132115	108.93	DVEVAQLK(1)ER	2	-1.7441	1
	TRINITY_DN99012_c0_g1_m.34527	152	K	TRINITY_DN99012_c0_g1|g.34527 ORF TRINITY_DN99012_c0_g1|g.34527 TRINITY_DN99012_c0_g1_m.34527 type:5prime_partial len:387 (+) TRINITY_DN99012_c0_g1:3-1163(+)	1	0.000831514	63.908	SFEVIDEVK(1)EALEK	2	3.1318	1
	TRINITY_DN99012_c0_g1_m.34527	301	K	TRINITY_DN99012_c0_g1|g.34527 ORF TRINITY_DN99012_c0_g1|g.34527 TRINITY_DN99012_c0_g1_m.34527 type:5prime_partial len:387 (+) TRINITY_DN99012_c0_g1:3-1163(+)	1	7.42605e-06	124.81	FDNQYFK(1)DLR	2	4.9461	1
	TRINITY_DN99063_c1_g1_m.34602	134	K	TRINITY_DN99063_c1_g1|g.34602 ORF TRINITY_DN99063_c1_g1|g.34602 TRINITY_DN99063_c1_g1_m.34602 type:complete len:190 (+) TRINITY_DN99063_c1_g1:129-698(+)	1	1.03732e-05	76.255	LFQCPK(1)ELAEEHYK	3	-1.3149	1
	TRINITY_DN99063_c1_g1_m.34602	142	K	TRINITY_DN99063_c1_g1|g.34602 ORF TRINITY_DN99063_c1_g1|g.34602 TRINITY_DN99063_c1_g1_m.34602 type:complete len:190 (+) TRINITY_DN99063_c1_g1:129-698(+)	1	0.0573052	53.028	ELAEEHYK(1)ELK	2	-8.1123	1
	TRINITY_DN99066_c0_g1_m.34606	237	K	TRINITY_DN99066_c0_g1|g.34606 ORF TRINITY_DN99066_c0_g1|g.34606 TRINITY_DN99066_c0_g1_m.34606 type:complete len:291 (+) TRINITY_DN99066_c0_g1:226-1098(+)	1	0.00432166	77.072	DYAESHK(1)K	2	1.7229	1
	TRINITY_DN99066_c0_g1_m.34606	182	K	TRINITY_DN99066_c0_g1|g.34606 ORF TRINITY_DN99066_c0_g1|g.34606 TRINITY_DN99066_c0_g1_m.34606 type:complete len:291 (+) TRINITY_DN99066_c0_g1:226-1098(+)	1	3.96742e-08	84.102	EPLK(1)FDNSYFVELLK	2	4.6163	1
	TRINITY_DN99066_c0_g1_m.34606	164	K	TRINITY_DN99066_c0_g1|g.34606 ORF TRINITY_DN99066_c0_g1|g.34606 TRINITY_DN99066_c0_g1_m.34606 type:complete len:291 (+) TRINITY_DN99066_c0_g1:226-1098(+)	1	3.53108e-05	73.502	DIVALSGGHTLGK(1)AHSER	3	-0.90016	1
	TRINITY_DN99066_c0_g1_m.34606	230	K	TRINITY_DN99066_c0_g1|g.34606 ORF TRINITY_DN99066_c0_g1|g.34606 TRINITY_DN99066_c0_g1_m.34606 type:complete len:291 (+) TRINITY_DN99066_c0_g1:226-1098(+)	1	3.98682e-12	147.72	DEEAFFK(1)DYAESHK	2	-2.5363	2
	TRINITY_DN99066_c0_g1_m.34606	12	K	TRINITY_DN99066_c0_g1|g.34606 ORF TRINITY_DN99066_c0_g1|g.34606 TRINITY_DN99066_c0_g1_m.34606 type:complete len:291 (+) TRINITY_DN99066_c0_g1:226-1098(+)	1	5.80688e-09	92.747	AQPVVDAEYLK(1)EIER	2	3.075	1
	TRINITY_DN99066_c0_g1_m.34606	47	K	TRINITY_DN99066_c0_g1|g.34606 ORF TRINITY_DN99066_c0_g1|g.34606 TRINITY_DN99066_c0_g1_m.34606 type:complete len:291 (+) TRINITY_DN99066_c0_g1:226-1098(+)	1	7.55794e-08	108.24	LAWHDAGTYDK(1)ATK	2	-1.0113	2
	TRINITY_DN99117_c0_g1_m.34685	724	K	TRINITY_DN99117_c0_g1|g.34685 ORF TRINITY_DN99117_c0_g1|g.34685 TRINITY_DN99117_c0_g1_m.34685 type:complete len:963 (+) TRINITY_DN99117_c0_g1:136-3024(+)	1	9.43968e-13	147.72	QIHELEQLK(1)EIELSR	3	-1.6697	1
	TRINITY_DN99117_c0_g1_m.34685	37	K	TRINITY_DN99117_c0_g1|g.34685 ORF TRINITY_DN99117_c0_g1|g.34685 TRINITY_DN99117_c0_g1_m.34685 type:complete len:963 (+) TRINITY_DN99117_c0_g1:136-3024(+)	1	0.000973778	49.097	QAALQALHDLITSK(1)R	3	-1.7203	1
	TRINITY_DN99117_c0_g1_m.34685	806	K	TRINITY_DN99117_c0_g1|g.34685 ORF TRINITY_DN99117_c0_g1|g.34685 TRINITY_DN99117_c0_g1_m.34685 type:complete len:963 (+) TRINITY_DN99117_c0_g1:136-3024(+)	1	0.0127174	57.293	LSK(1)IQAEEEAR	2	0.047806	1
	TRINITY_DN99117_c0_g1_m.34685	798	K	TRINITY_DN99117_c0_g1|g.34685 ORF TRINITY_DN99117_c0_g1|g.34685 TRINITY_DN99117_c0_g1_m.34685 type:complete len:963 (+) TRINITY_DN99117_c0_g1:136-3024(+)	1	0.00149243	83.358	LLYYIK(1)TEEER	2	-0.391	1
	TRINITY_DN99136_c0_g1_m.34714	457	K	TRINITY_DN99136_c0_g1|g.34714 ORF TRINITY_DN99136_c0_g1|g.34714 TRINITY_DN99136_c0_g1_m.34714 type:complete len:618 (+) TRINITY_DN99136_c0_g1:151-2004(+)	1	0.0459296	59.645	LSSK(1)YYNVLLK	2	-1.6554	1
	TRINITY_DN99155_c0_g1_m.34740	200	K	TRINITY_DN99155_c0_g1|g.34740 ORF TRINITY_DN99155_c0_g1|g.34740 TRINITY_DN99155_c0_g1_m.34740 type:complete len:214 (+) TRINITY_DN99155_c0_g1:77-718(+)	1	0.0360222	55.235	GSSNSYAIK(1)K	2	0.85387	1
	TRINITY_DN99199_c0_g1_m.34822	154	K	TRINITY_DN99199_c0_g1|g.34822 ORF TRINITY_DN99199_c0_g1|g.34822 TRINITY_DN99199_c0_g1_m.34822 type:complete len:447 (+) TRINITY_DN99199_c0_g1:52-1392(+)	1	7.18678e-06	90.306	ILQEHK(1)NELK	2	-2.1154	1
	TRINITY_DN99199_c0_g1_m.34822	58	K	TRINITY_DN99199_c0_g1|g.34822 ORF TRINITY_DN99199_c0_g1|g.34822 TRINITY_DN99199_c0_g1_m.34822 type:complete len:447 (+) TRINITY_DN99199_c0_g1:52-1392(+)	1	0.00162326	48.892	IHEK(1)PELGYEEFETSELVR	3	1.897	1
	TRINITY_DN99199_c0_g1_m.34822	301	K	TRINITY_DN99199_c0_g1|g.34822 ORF TRINITY_DN99199_c0_g1|g.34822 TRINITY_DN99199_c0_g1_m.34822 type:complete len:447 (+) TRINITY_DN99199_c0_g1:52-1392(+)	1	0.000138331	85.813	ESFFQLK(1)QR	2	-1.8007	1
	TRINITY_DN99283_c0_g1_m.34976	339	K	TRINITY_DN99283_c0_g1|g.34976 ORF TRINITY_DN99283_c0_g1|g.34976 TRINITY_DN99283_c0_g1_m.34976 type:complete len:564 (+) TRINITY_DN99283_c0_g1:437-2128(+)	1	0.0169723	60.892	YAK(1)DEQLIR	2	-0.013015	1
	TRINITY_DN99283_c0_g1_m.34976	458	K	TRINITY_DN99283_c0_g1|g.34976 ORF TRINITY_DN99283_c0_g1|g.34976 TRINITY_DN99283_c0_g1_m.34976 type:complete len:564 (+) TRINITY_DN99283_c0_g1:437-2128(+)	1	0.00727561	73.655	FDLHAK(1)PEAGK	2	1.7636	1
	TRINITY_DN99287_c1_g1_m.34983	108	K	TRINITY_DN99287_c1_g1|g.34983 ORF TRINITY_DN99287_c1_g1|g.34983 TRINITY_DN99287_c1_g1_m.34983 type:complete len:530 (+) TRINITY_DN99287_c1_g1:118-1707(+)	1	0.0125377	72.042	LPGSK(1)SLSNR	2	0.81282	1
	TRINITY_DN99292_c0_g1_m.34995	559	K	TRINITY_DN99292_c0_g1|g.34995 ORF TRINITY_DN99292_c0_g1|g.34995 TRINITY_DN99292_c0_g1_m.34995 type:complete len:812 (+) TRINITY_DN99292_c0_g1:316-2751(+)	1	0.000298084	96.957	IVSK(1)IEAGER	2	-0.030346	1
	TRINITY_DN99292_c0_g1_m.34995	147	K	TRINITY_DN99292_c0_g1|g.34995 ORF TRINITY_DN99292_c0_g1|g.34995 TRINITY_DN99292_c0_g1_m.34995 type:complete len:812 (+) TRINITY_DN99292_c0_g1:316-2751(+)	1	2.0195e-07	110.44	IHVK(1)LQYFDVSK	2	1.5093	2
	TRINITY_DN99292_c0_g1_m.34995	161	K	TRINITY_DN99292_c0_g1|g.34995 ORF TRINITY_DN99292_c0_g1|g.34995 TRINITY_DN99292_c0_g1_m.34995 type:complete len:812 (+) TRINITY_DN99292_c0_g1:316-2751(+)	1	0.0126214	75.915	NWAK(1)GIR	2	-0.2572	1
	TRINITY_DN99292_c0_g1_m.34995	155	K	TRINITY_DN99292_c0_g1|g.34995 ORF TRINITY_DN99292_c0_g1|g.34995 TRINITY_DN99292_c0_g1_m.34995 type:complete len:812 (+) TRINITY_DN99292_c0_g1:316-2751(+)	1	5.45576e-09	154.81	LQYFDVSK(1)DR	2	-0.53301	1
	TRINITY_DN99292_c0_g1_m.34995	261	K	TRINITY_DN99292_c0_g1|g.34995 ORF TRINITY_DN99292_c0_g1|g.34995 TRINITY_DN99292_c0_g1_m.34995 type:complete len:812 (+) TRINITY_DN99292_c0_g1:316-2751(+)	1	1.73252e-08	171.09	QKPGGDATLGELLK(1)R	3	-2.9373	1
	TRINITY_DN99292_c0_g1_m.34995	347	K	TRINITY_DN99292_c0_g1|g.34995 ORF TRINITY_DN99292_c0_g1|g.34995 TRINITY_DN99292_c0_g1_m.34995 type:complete len:812 (+) TRINITY_DN99292_c0_g1:316-2751(+)	1	1.12931e-05	83.474	IVVVDHEMPVK(1)GSEQR	2	-2.0799	1
	TRINITY_DN99292_c0_g1_m.34995	801	K	TRINITY_DN99292_c0_g1|g.34995 ORF TRINITY_DN99292_c0_g1|g.34995 TRINITY_DN99292_c0_g1_m.34995 type:complete len:812 (+) TRINITY_DN99292_c0_g1:316-2751(+)	1	0.00491437	54.199	ILGSK(1)ADYMPPILTT	2	1.9958	1
	TRINITY_DN99292_c0_g1_m.34995	435	K	TRINITY_DN99292_c0_g1|g.34995 ORF TRINITY_DN99292_c0_g1|g.34995 TRINITY_DN99292_c0_g1_m.34995 type:complete len:812 (+) TRINITY_DN99292_c0_g1:316-2751(+)	1	5.10884e-05	85.716	QGGK(1)DLLLQIR	2	-0.42716	1
	TRINITY_DN99292_c0_g1_m.34995	143	K	TRINITY_DN99292_c0_g1|g.34995 ORF TRINITY_DN99292_c0_g1|g.34995 TRINITY_DN99292_c0_g1_m.34995 type:complete len:812 (+) TRINITY_DN99292_c0_g1:316-2751(+)	1	8.06919e-07	108.93	NPVSGGAK(1)IHVK	2	-1.7109	1
	TRINITY_DN99292_c0_g1_m.34995	47	K	TRINITY_DN99292_c0_g1|g.34995 ORF TRINITY_DN99292_c0_g1|g.34995 TRINITY_DN99292_c0_g1_m.34995 type:complete len:812 (+) TRINITY_DN99292_c0_g1:316-2751(+)	1	1.20305e-19	116.36	LVEGIEDTVGLGK(1)GSTR	2	-0.19235	1
	TRINITY_DN99292_c0_g1_m.34995	495	K	TRINITY_DN99292_c0_g1|g.34995 ORF TRINITY_DN99292_c0_g1|g.34995 TRINITY_DN99292_c0_g1_m.34995 type:complete len:812 (+) TRINITY_DN99292_c0_g1:316-2751(+)	1	0.0009123	76.255	AGLVSGK(1)DNIIDR	2	2.3399	1
	TRINITY_DN99292_c0_g1_m.34995	750	K	TRINITY_DN99292_c0_g1|g.34995 ORF TRINITY_DN99292_c0_g1|g.34995 TRINITY_DN99292_c0_g1_m.34995 type:complete len:812 (+) TRINITY_DN99292_c0_g1:316-2751(+)	1	6.77853e-06	66.66	IAEK(1)YWDLYSSETLER	2	0.93054	1
	TRINITY_DN99292_c0_g1_m.34995	550	K	TRINITY_DN99292_c0_g1|g.34995 ORF TRINITY_DN99292_c0_g1|g.34995 TRINITY_DN99292_c0_g1_m.34995 type:complete len:812 (+) TRINITY_DN99292_c0_g1:316-2751(+)	1	1.82701e-07	104.23	ADGIKPEEVGALHLIPK(1)ELSLK	3	1.325	1
	TRINITY_DN99397_c1_g2_m.35183	78	K	TRINITY_DN99397_c1_g2|g.35183 ORF TRINITY_DN99397_c1_g2|g.35183 TRINITY_DN99397_c1_g2_m.35183 type:3prime_partial len:104 (+) TRINITY_DN99397_c1_g2:79-387(+)	1	0.00159418	85.716	DAVTYTEHAK(1)R	2	-0.68489	1
	TRINITY_DN99454_c0_g1_m.35255	417	K	TRINITY_DN99454_c0_g1|g.35255 ORF TRINITY_DN99454_c0_g1|g.35255 TRINITY_DN99454_c0_g1_m.35255 type:5prime_partial len:456 (+) TRINITY_DN99454_c0_g1:3-1370(+)	1	1.74295e-05	94.791	IEAAVIETLNK(1)GFR	2	0.034032	1
	TRINITY_DN99505_c0_g1_m.35334	605	K	TRINITY_DN99505_c0_g1|g.35334 ORF TRINITY_DN99505_c0_g1|g.35334 TRINITY_DN99505_c0_g1_m.35334 type:complete len:742 (+) TRINITY_DN99505_c0_g1:105-2330(+)	1	0.000121164	53.363	DAFVLYQGHHGDK(1)GVYR	3	3.1562	1
	TRINITY_DN99505_c0_g1_m.35334	142	K	TRINITY_DN99505_c0_g1|g.35334 ORF TRINITY_DN99505_c0_g1|g.35334 TRINITY_DN99505_c0_g1_m.35334 type:complete len:742 (+) TRINITY_DN99505_c0_g1:105-2330(+)	1	0.00449244	83.623	IK(1)TNTPVAK	2	1.2337	1
	TRINITY_DN99505_c0_g1_m.35334	337	K	TRINITY_DN99505_c0_g1|g.35334 ORF TRINITY_DN99505_c0_g1|g.35334 TRINITY_DN99505_c0_g1_m.35334 type:complete len:742 (+) TRINITY_DN99505_c0_g1:105-2330(+)	1	0.00192223	81.32	FFYDGLK(1)R	2	-1.6619	1
	TRINITY_DN99505_c0_g1_m.35334	729	K	TRINITY_DN99505_c0_g1|g.35334 ORF TRINITY_DN99505_c0_g1|g.35334 TRINITY_DN99505_c0_g1_m.35334 type:complete len:742 (+) TRINITY_DN99505_c0_g1:105-2330(+)	1	0.00062184	49.487	ASK(1)IMSQCSSQLSK	2	-2.3174	1
	TRINITY_DN99566_c0_g1_m.35422	83	K	TRINITY_DN99566_c0_g1|g.35422 ORF TRINITY_DN99566_c0_g1|g.35422 TRINITY_DN99566_c0_g1_m.35422 type:5prime_partial len:637 (+) TRINITY_DN99566_c0_g1:2-1912(+)	1	2.97469e-11	127.03	IK(1)SMPTKPVEGQK	2	-4.4603	2
	TRINITY_DN99583_c0_g1_m.35454	120	K	TRINITY_DN99583_c0_g1|g.35454 ORF TRINITY_DN99583_c0_g1|g.35454 TRINITY_DN99583_c0_g1_m.35454 type:complete len:807 (+) TRINITY_DN99583_c0_g1:226-2646(+)	1	0.00127036	57.293	EK(1)LVDEHCSNDK	2	-1.7383	1
	TRINITY_DN99583_c0_g1_m.35454	217	K	TRINITY_DN99583_c0_g1|g.35454 ORF TRINITY_DN99583_c0_g1|g.35454 TRINITY_DN99583_c0_g1_m.35454 type:complete len:807 (+) TRINITY_DN99583_c0_g1:226-2646(+)	1	0.000761226	79.311	AEEYLSK(1)IDPK	2	5.5623	1
	TRINITY_DN99583_c0_g1_m.35454	210	K	TRINITY_DN99583_c0_g1|g.35454 ORF TRINITY_DN99583_c0_g1|g.35454 TRINITY_DN99583_c0_g1_m.35454 type:complete len:807 (+) TRINITY_DN99583_c0_g1:226-2646(+)	1	5.96446e-12	151.52	LQSTLSK(1)AEEYLSK	2	2.6463	1
	TRINITY_DN99583_c0_g1_m.35454	594	K	TRINITY_DN99583_c0_g1|g.35454 ORF TRINITY_DN99583_c0_g1|g.35454 TRINITY_DN99583_c0_g1_m.35454 type:complete len:807 (+) TRINITY_DN99583_c0_g1:226-2646(+)	1	1.2139e-05	111.98	NLSGLVELFGK(1)SSQLR	2	3.9238	1
	TRINITY_DN99583_c0_g1_m.35454	451	K	TRINITY_DN99583_c0_g1|g.35454 ORF TRINITY_DN99583_c0_g1|g.35454 TRINITY_DN99583_c0_g1_m.35454 type:complete len:807 (+) TRINITY_DN99583_c0_g1:226-2646(+)	1	0.000508591	54.199	YPDSDIYWK(1)SYEEK	2	-0.27369	1
	TRINITY_DN99583_c0_g1_m.35454	322	K	TRINITY_DN99583_c0_g1|g.35454 ORF TRINITY_DN99583_c0_g1|g.35454 TRINITY_DN99583_c0_g1_m.35454 type:complete len:807 (+) TRINITY_DN99583_c0_g1:226-2646(+)	1	2.02917e-06	106.35	IK(1)NQGLDVDPR	2	-0.28028	2
	TRINITY_DN99583_c0_g1_m.35454	614	K	TRINITY_DN99583_c0_g1|g.35454 ORF TRINITY_DN99583_c0_g1|g.35454 TRINITY_DN99583_c0_g1_m.35454 type:complete len:807 (+) TRINITY_DN99583_c0_g1:226-2646(+)	1	0.00012619	82.437	ELANLVVIGGYNDVK(1)R	2	1.844	1
	TRINITY_DN99583_c0_g1_m.35454	358	K	TRINITY_DN99583_c0_g1|g.35454 ORF TRINITY_DN99583_c0_g1|g.35454 TRINITY_DN99583_c0_g1_m.35454 type:complete len:807 (+) TRINITY_DN99583_c0_g1:226-2646(+)	1	0.0137888	40.386	VTGTK(1)HTHILR	3	-0.95416	1
	TRINITY_DN99583_c0_g1_m.35454	528	K	TRINITY_DN99583_c0_g1|g.35454 ORF TRINITY_DN99583_c0_g1|g.35454 TRINITY_DN99583_c0_g1_m.35454 type:complete len:807 (+) TRINITY_DN99583_c0_g1:226-2646(+)	1	0.00138549	73.305	FNIVSPGADK(1)SIYFPHSEIEK	3	-0.90667	1
	TRINITY_DN99583_c0_g1_m.35454	583	K	TRINITY_DN99583_c0_g1|g.35454 ORF TRINITY_DN99583_c0_g1|g.35454 TRINITY_DN99583_c0_g1_m.35454 type:complete len:807 (+) TRINITY_DN99583_c0_g1:226-2646(+)	1	2.37067e-12	133.49	VK(1)NLSGLVELFGK	2	-0.047996	1
	TRINITY_DN99583_c0_g1_m.35454	742	K	TRINITY_DN99583_c0_g1|g.35454 ORF TRINITY_DN99583_c0_g1|g.35454 TRINITY_DN99583_c0_g1_m.35454 type:complete len:807 (+) TRINITY_DN99583_c0_g1:226-2646(+)	1	0.0055231	44.82	ESGYWDEISK(1)AGLQR	2	-1.4496	1
	TRINITY_DN99583_c0_g1_m.35454	634	K	TRINITY_DN99583_c0_g1|g.35454 ORF TRINITY_DN99583_c0_g1|g.35454 TRINITY_DN99583_c0_g1_m.35454 type:complete len:807 (+) TRINITY_DN99583_c0_g1:226-2646(+)	1	0.0616941	54.436	K(1)YGLDGQFR	2	2.5702	1
	TRINITY_DN99583_c0_g1_m.35454	343	K	TRINITY_DN99583_c0_g1|g.35454 ORF TRINITY_DN99583_c0_g1|g.35454 TRINITY_DN99583_c0_g1_m.35454 type:complete len:807 (+) TRINITY_DN99583_c0_g1:226-2646(+)	1	0.000758951	73.655	LIPEAK(1)GTTCNQR	2	-1.4999	1
	TRINITY_DN99600_c0_g1_m.35483	538	K	TRINITY_DN99600_c0_g1|g.35483 ORF TRINITY_DN99600_c0_g1|g.35483 TRINITY_DN99600_c0_g1_m.35483 type:complete len:544 (+) TRINITY_DN99600_c0_g1:194-1825(+)	1	0.0276559	46.802	ELIQK(1)VR	2	-0.078482	1
	TRINITY_DN99600_c0_g1_m.35483	141	K	TRINITY_DN99600_c0_g1|g.35483 ORF TRINITY_DN99600_c0_g1|g.35483 TRINITY_DN99600_c0_g1_m.35483 type:complete len:544 (+) TRINITY_DN99600_c0_g1:194-1825(+)	1	0.00557028	63.212	FVFTVPQLWDK(1)VK	2	-0.081562	1
	TRINITY_DN99606_c0_g1_m.35495	821	K	TRINITY_DN99606_c0_g1|g.35495 ORF TRINITY_DN99606_c0_g1|g.35495 TRINITY_DN99606_c0_g1_m.35495 type:complete len:989 (+) TRINITY_DN99606_c0_g1:31-2997(+)	1	0.0344401	51.43	VADLK(1)SR	2	2.3808	1
	TRINITY_DN99606_c0_g1_m.35495	411	K	TRINITY_DN99606_c0_g1|g.35495 ORF TRINITY_DN99606_c0_g1|g.35495 TRINITY_DN99606_c0_g1_m.35495 type:complete len:989 (+) TRINITY_DN99606_c0_g1:31-2997(+)	1	2.43033e-08	123.99	IK(1)DIISEEEASFGR	2	-1.8658	1
	TRINITY_DN99606_c0_g1_m.35495	114	K	TRINITY_DN99606_c0_g1|g.35495 ORF TRINITY_DN99606_c0_g1|g.35495 TRINITY_DN99606_c0_g1_m.35495 type:complete len:989 (+) TRINITY_DN99606_c0_g1:31-2997(+)	1	9.56188e-05	125.98	ACNTQK(1)CIR	2	0.33206	1
	TRINITY_DN99618_c1_g1_m.35517	164	K	TRINITY_DN99618_c1_g1|g.35517 ORF TRINITY_DN99618_c1_g1|g.35517 TRINITY_DN99618_c1_g1_m.35517 type:complete len:169 (+) TRINITY_DN99618_c1_g1:134-640(+)	1	1.4144e-05	78.673	GSYTFYCSPHQGAGMVGK(1)VTVK	3	-0.32995	1
	TRINITY_DN99633_c2_g5_m.35546	132	K	TRINITY_DN99633_c2_g5|g.35546 ORF TRINITY_DN99633_c2_g5|g.35546 TRINITY_DN99633_c2_g5_m.35546 type:complete len:175 (+) TRINITY_DN99633_c2_g5:200-724(+)	1	1.62889e-05	121.96	TPWLDGK(1)HVVFGK	2	1.634	1
	TRINITY_DN99633_c2_g5_m.35546	138	K	TRINITY_DN99633_c2_g5|g.35546 ORF TRINITY_DN99633_c2_g5|g.35546 TRINITY_DN99633_c2_g5_m.35546 type:complete len:175 (+) TRINITY_DN99633_c2_g5:200-724(+)	1	0.00102102	70.552	HVVFGK(1)VVDGYSVVQAMER	3	0.61477	1
	TRINITY_DN99633_c2_g5_m.35546	97	K	TRINITY_DN99633_c2_g5|g.35546 ORF TRINITY_DN99633_c2_g5|g.35546 TRINITY_DN99633_c2_g5_m.35546 type:complete len:175 (+) TRINITY_DN99633_c2_g5:200-724(+)	1	0.00433612	59.645	FDDENFTK(1)K	2	1.9103	2
	TRINITY_DN99648_c0_g1_m.35579	155	K	TRINITY_DN99648_c0_g1|g.35579 ORF TRINITY_DN99648_c0_g1|g.35579 TRINITY_DN99648_c0_g1_m.35579 type:5prime_partial len:401 (+) TRINITY_DN99648_c0_g1:1-1203(+)	1	0.0529867	46.835	PVVLNPK(1)K	2	-0.082084	1
	TRINITY_DN99677_c0_g1_m.35631	221	K	TRINITY_DN99677_c0_g1|g.35631 ORF TRINITY_DN99677_c0_g1|g.35631 TRINITY_DN99677_c0_g1_m.35631 type:complete len:790 (+) TRINITY_DN99677_c0_g1:64-2433(+)	1	5.4854e-27	188.19	AIQDSASWSSLSAAHK(1)R	2	-3.7453	1
	TRINITY_DN99677_c0_g1_m.35631	259	K	TRINITY_DN99677_c0_g1|g.35631 ORF TRINITY_DN99677_c0_g1|g.35631 TRINITY_DN99677_c0_g1_m.35631 type:complete len:790 (+) TRINITY_DN99677_c0_g1:64-2433(+)	1	0.000800869	84.102	LSQK(1)FNENVLDATK	2	-1.118	1
	TRINITY_DN99677_c0_g1_m.35631	642	K	TRINITY_DN99677_c0_g1|g.35631 ORF TRINITY_DN99677_c0_g1|g.35631 TRINITY_DN99677_c0_g1_m.35631 type:complete len:790 (+) TRINITY_DN99677_c0_g1:64-2433(+)	1	0.0156125	65.313	LLAAK(1)TFR	2	-0.54434	1
	TRINITY_DN99677_c0_g1_m.35631	171	K	TRINITY_DN99677_c0_g1|g.35631 ORF TRINITY_DN99677_c0_g1|g.35631 TRINITY_DN99677_c0_g1_m.35631 type:complete len:790 (+) TRINITY_DN99677_c0_g1:64-2433(+)	1	0.0149969	42.075	AVK(1)DSSELR	2	0.091465	1
	TRINITY_DN99730_c1_g1_m.35718	112	K	TRINITY_DN99730_c1_g1|g.35718 ORF TRINITY_DN99730_c1_g1|g.35718 TRINITY_DN99730_c1_g1_m.35718 type:complete len:539 (+) TRINITY_DN99730_c1_g1:118-1734(+)	1	0.0324634	55.235	EVLGK(1)LEEAK	2	-0.81362	1
	TRINITY_DN99730_c1_g1_m.35718	254	K	TRINITY_DN99730_c1_g1|g.35718 ORF TRINITY_DN99730_c1_g1|g.35718 TRINITY_DN99730_c1_g1_m.35718 type:complete len:539 (+) TRINITY_DN99730_c1_g1:118-1734(+)	1	0.000123954	68.548	RVPVNK(1)EFVADVK	2	-1.4404	1
	TRINITY_DN99730_c1_g1_m.35718	2	K	TRINITY_DN99730_c1_g1|g.35718 ORF TRINITY_DN99730_c1_g1|g.35718 TRINITY_DN99730_c1_g1_m.35718 type:complete len:539 (+) TRINITY_DN99730_c1_g1:118-1734(+)	1	0.0124874	67.507	MK(1)MEDSLK	2	2.2676	1
	TRINITY_DN99904_c0_g1_m.36020	173	K	TRINITY_DN99904_c0_g1|g.36020 ORF TRINITY_DN99904_c0_g1|g.36020 TRINITY_DN99904_c0_g1_m.36020 type:complete len:442 (+) TRINITY_DN99904_c0_g1:193-1518(+)	1	0.000756595	83.775	VVQK(1)QFHDLGGK	2	-3.705	1
	TRINITY_DN99904_c0_g1_m.36020	181	K	TRINITY_DN99904_c0_g1|g.36020 ORF TRINITY_DN99904_c0_g1|g.36020 TRINITY_DN99904_c0_g1_m.36020 type:complete len:442 (+) TRINITY_DN99904_c0_g1:193-1518(+)	1	6.21943e-08	124.06	QFHDLGGK(1)AVEVK	2	-2.3196	2
	TRINITY_DN99916_c9_g2_m.36042	161	K	TRINITY_DN99916_c9_g2|g.36042 ORF TRINITY_DN99916_c9_g2|g.36042 TRINITY_DN99916_c9_g2_m.36042 type:complete len:227 (+) TRINITY_DN99916_c9_g2:138-818(+)	1	0.0081032	48.157	FMPEMMDK(1)VR	2	-0.445	1
	TRINITY_DN99946_c0_g1_m.36092	238	K	TRINITY_DN99946_c0_g1|g.36092 ORF TRINITY_DN99946_c0_g1|g.36092 TRINITY_DN99946_c0_g1_m.36092 type:complete len:470 (+) TRINITY_DN99946_c0_g1:381-1790(+)	1	0.00794218	50.297	VIQK(1)QIAEGK	2	-0.57204	1
	TRINITY_DN99946_c0_g1_m.36092	408	K	TRINITY_DN99946_c0_g1|g.36092 ORF TRINITY_DN99946_c0_g1|g.36092 TRINITY_DN99946_c0_g1_m.36092 type:complete len:470 (+) TRINITY_DN99946_c0_g1:381-1790(+)	1	0.00110977	87.251	GLQNFNNAK(1)R	2	-0.62846	1
	TRINITY_DN99946_c0_g1_m.36092	234	K	TRINITY_DN99946_c0_g1|g.36092 ORF TRINITY_DN99946_c0_g1|g.36092 TRINITY_DN99946_c0_g1_m.36092 type:complete len:470 (+) TRINITY_DN99946_c0_g1:381-1790(+)	1	0.000462756	59.997	LDINGEEQSNSLAK(1)VIQK	2	-3.3618	1
	TRINITY_DN99946_c0_g1_m.36092	399	K	TRINITY_DN99946_c0_g1|g.36092 ORF TRINITY_DN99946_c0_g1|g.36092 TRINITY_DN99946_c0_g1_m.36092 type:complete len:470 (+) TRINITY_DN99946_c0_g1:381-1790(+)	1	0.000225878	86.205	WK(1)GLQNFNNAK	2	4.4679	1
	TRINITY_DN99946_c0_g1_m.36092	146	K	TRINITY_DN99946_c0_g1|g.36092 ORF TRINITY_DN99946_c0_g1|g.36092 TRINITY_DN99946_c0_g1_m.36092 type:complete len:470 (+) TRINITY_DN99946_c0_g1:381-1790(+)	1	1.17569e-05	124.06	TDEESASDLTILLK(1)K	2	8.0463	1
organic substance metabolic process	TRINITY_DN100000_c0_g1_m.1	103	K	TRINITY_DN100000_c0_g1|g.1 ORF TRINITY_DN100000_c0_g1|g.1 TRINITY_DN100000_c0_g1_m.1 type:complete len:446 (+) TRINITY_DN100000_c0_g1:98-1435(+)	1	0.00579866	74.486	SK(1)VDDLR	2	-0.16887	1
	TRINITY_DN100000_c0_g1_m.1	418	K	TRINITY_DN100000_c0_g1|g.1 ORF TRINITY_DN100000_c0_g1|g.1 TRINITY_DN100000_c0_g1_m.1 type:complete len:446 (+) TRINITY_DN100000_c0_g1:98-1435(+)	1	0.00658958	61.48	MK(1)VTQVDFK	2	0.87541	1
	TRINITY_DN100000_c0_g1_m.1	91	K	TRINITY_DN100000_c0_g1|g.1 ORF TRINITY_DN100000_c0_g1|g.1 TRINITY_DN100000_c0_g1_m.1 type:complete len:446 (+) TRINITY_DN100000_c0_g1:98-1435(+)	0.998407	0.00147268	46.068	LK(0.998)PHEDK(0.002)NEEDR	3	0.52218	1
	TRINITY_DN100000_c0_g1_m.1	425	K	TRINITY_DN100000_c0_g1|g.1 ORF TRINITY_DN100000_c0_g1|g.1 TRINITY_DN100000_c0_g1_m.1 type:complete len:446 (+) TRINITY_DN100000_c0_g1:98-1435(+)	1	0.02513	58.286	VTQVDFK(1)K	2	-1.1828	1
	TRINITY_DN100025_c1_g9_m.49	188	K	TRINITY_DN100025_c1_g9|g.49 ORF TRINITY_DN100025_c1_g9|g.49 TRINITY_DN100025_c1_g9_m.49 type:complete len:262 (+) TRINITY_DN100025_c1_g9:132-917(+)	1	0.00702904	87.251	AGNAYHK(1)YR	2	3.4349	1
	TRINITY_DN100046_c0_g1_m.79	124	K	TRINITY_DN100046_c0_g1|g.79 ORF TRINITY_DN100046_c0_g1|g.79 TRINITY_DN100046_c0_g1_m.79 type:complete len:1025 (+) TRINITY_DN100046_c0_g1:238-3312(+)	1	1.06133e-12	137.39	FDAGLTESQMTDHMK(1)R	3	-0.2686	2
	TRINITY_DN100046_c0_g1_m.79	778	K	TRINITY_DN100046_c0_g1|g.79 ORF TRINITY_DN100046_c0_g1|g.79 TRINITY_DN100046_c0_g1_m.79 type:complete len:1025 (+) TRINITY_DN100046_c0_g1:238-3312(+)	1	7.9052e-05	70.806	TFCIPHGGGGPGMGPIGVK(1)K	3	-3.9567	1
	TRINITY_DN100046_c0_g1_m.79	445	K	TRINITY_DN100046_c0_g1|g.79 ORF TRINITY_DN100046_c0_g1|g.79 TRINITY_DN100046_c0_g1_m.79 type:complete len:1025 (+) TRINITY_DN100046_c0_g1:238-3312(+)	1	0.000298977	62.398	LGTVDVQELPFFDTVK(1)VK	2	3.4869	1
	TRINITY_DN100046_c0_g1_m.79	363	K	TRINITY_DN100046_c0_g1|g.79 ORF TRINITY_DN100046_c0_g1|g.79 TRINITY_DN100046_c0_g1_m.79 type:complete len:1025 (+) TRINITY_DN100046_c0_g1:238-3312(+)	1	2.15481e-07	145.95	IIGVSLDSSGK(1)PALR	2	-1.9676	1
	TRINITY_DN100046_c0_g1_m.79	879	K	TRINITY_DN100046_c0_g1|g.79 ORF TRINITY_DN100046_c0_g1|g.79 TRINITY_DN100046_c0_g1_m.79 type:complete len:1025 (+) TRINITY_DN100046_c0_g1:238-3312(+)	1	1.57796e-06	108.91	GFK(1)QTAGIEAEDVAK	2	-3.3508	1
	TRINITY_DN100046_c0_g1_m.79	891	K	TRINITY_DN100046_c0_g1|g.79 ORF TRINITY_DN100046_c0_g1|g.79 TRINITY_DN100046_c0_g1_m.79 type:complete len:1025 (+) TRINITY_DN100046_c0_g1:238-3312(+)	1	4.21918e-16	176.97	QTAGIEAEDVAK(1)R	2	-3.1331	1
	TRINITY_DN100046_c0_g1_m.79	678	K	TRINITY_DN100046_c0_g1|g.79 ORF TRINITY_DN100046_c0_g1|g.79 TRINITY_DN100046_c0_g1_m.79 type:complete len:1025 (+) TRINITY_DN100046_c0_g1:238-3312(+)	1	6.88712e-14	120.75	IVSVGTDSK(1)GNINIEEVR	2	-2.2185	1
	TRINITY_DN100046_c0_g1_m.79	945	K	TRINITY_DN100046_c0_g1|g.79 ORF TRINITY_DN100046_c0_g1|g.79 TRINITY_DN100046_c0_g1_m.79 type:complete len:1025 (+) TRINITY_DN100046_c0_g1:238-3312(+)	1	4.29914e-08	126.48	EIENGK(1)ADINNNVLK	2	-1.0608	1
	TRINITY_DN100080_c0_g1_m.120	318	K	TRINITY_DN100080_c0_g1|g.120 ORF TRINITY_DN100080_c0_g1|g.120 TRINITY_DN100080_c0_g1_m.120 type:complete len:401 (+) TRINITY_DN100080_c0_g1:95-1297(+)	1	0.000146939	66.509	LCAQAAGLEAK(1)IIHYDPK	3	-0.67715	1
	TRINITY_DN100080_c0_g1_m.120	325	K	TRINITY_DN100080_c0_g1|g.120 ORF TRINITY_DN100080_c0_g1|g.120 TRINITY_DN100080_c0_g1_m.120 type:complete len:401 (+) TRINITY_DN100080_c0_g1:95-1297(+)	1	2.69076e-05	91.939	IIHYDPK(1)SVGVDAK	2	-1.9088	2
	TRINITY_DN100081_c0_g1_m.121	535	K	TRINITY_DN100081_c0_g1|g.121 ORF TRINITY_DN100081_c0_g1|g.121 TRINITY_DN100081_c0_g1_m.121 type:complete len:630 (+) TRINITY_DN100081_c0_g1:237-2126(+)	1	0.00219563	65.408	AWESFHDVK(1)ISDR	2	-2.2052	1
	TRINITY_DN100081_c0_g1_m.121	319	K	TRINITY_DN100081_c0_g1|g.121 ORF TRINITY_DN100081_c0_g1|g.121 TRINITY_DN100081_c0_g1_m.121 type:complete len:630 (+) TRINITY_DN100081_c0_g1:237-2126(+)	1	0.0180236	67.548	YAPTAK(1)DLASR	2	-1.9904	1
	TRINITY_DN100081_c0_g1_m.121	602	K	TRINITY_DN100081_c0_g1|g.121 ORF TRINITY_DN100081_c0_g1|g.121 TRINITY_DN100081_c0_g1_m.121 type:complete len:630 (+) TRINITY_DN100081_c0_g1:237-2126(+)	1	4.65104e-05	81.799	HSLGYWENEK(1)VR	2	-0.81129	1
	TRINITY_DN100081_c0_g1_m.121	526	K	TRINITY_DN100081_c0_g1|g.121 ORF TRINITY_DN100081_c0_g1|g.121 TRINITY_DN100081_c0_g1_m.121 type:complete len:630 (+) TRINITY_DN100081_c0_g1:237-2126(+)	1	0.000623401	89.382	LIDK(1)AWESFHDVK	2	-2.3045	1
	TRINITY_DN100081_c0_g1_m.121	234	K	TRINITY_DN100081_c0_g1|g.121 ORF TRINITY_DN100081_c0_g1|g.121 TRINITY_DN100081_c0_g1_m.121 type:complete len:630 (+) TRINITY_DN100081_c0_g1:237-2126(+)	1	0.00392377	83.474	FSAK(1)STILATGGYGR	2	-0.47171	1
	TRINITY_DN100081_c0_g1_m.121	165	K	TRINITY_DN100081_c0_g1|g.121 ORF TRINITY_DN100081_c0_g1|g.121 TRINITY_DN100081_c0_g1_m.121 type:complete len:630 (+) TRINITY_DN100081_c0_g1:237-2126(+)	1	2.01956e-06	85.813	AFGGQSLNFGK(1)GGQAYR	2	-2.6951	1
	TRINITY_DN100081_c0_g1_m.121	522	K	TRINITY_DN100081_c0_g1|g.121 ORF TRINITY_DN100081_c0_g1|g.121 TRINITY_DN100081_c0_g1_m.121 type:complete len:630 (+) TRINITY_DN100081_c0_g1:237-2126(+)	1	1.83717e-08	108.91	TQETLEEGCK(1)LIDK	2	-2.7643	1
	TRINITY_DN100081_c0_g1_m.121	150	K	TRINITY_DN100081_c0_g1|g.121 ORF TRINITY_DN100081_c0_g1|g.121 TRINITY_DN100081_c0_g1_m.121 type:complete len:630 (+) TRINITY_DN100081_c0_g1:237-2126(+)	1	0.000127346	117.39	TEDGK(1)IYQR	2	0.46053	1
	TRINITY_DN100123_c0_g1_m.199	131	K	TRINITY_DN100123_c0_g1|g.199 ORF TRINITY_DN100123_c0_g1|g.199 TRINITY_DN100123_c0_g1_m.199 type:complete len:441 (+) TRINITY_DN100123_c0_g1:258-1580(+)	1	0.000788531	104.39	EK(1)GAVTQIK	2	-0.33289	1
	TRINITY_DN100126_c0_g1_m.201	307	K	TRINITY_DN100126_c0_g1|g.201 ORF TRINITY_DN100126_c0_g1|g.201 TRINITY_DN100126_c0_g1_m.201 type:complete len:481 (+) TRINITY_DN100126_c0_g1:290-1732(+)	1	0.00234772	79.059	INDYQK(1)SR	2	2.1235	1
	TRINITY_DN100201_c1_g1_m.332	958	K	TRINITY_DN100201_c1_g1|g.332 ORF TRINITY_DN100201_c1_g1|g.332 TRINITY_DN100201_c1_g1_m.332 type:complete len:1806 (+) TRINITY_DN100201_c1_g1:162-5579(+)	1	0.00794218	57.888	SSQSSYHK(1)FR	2	-1.7311	1
	TRINITY_DN100242_c0_g1_m.405	248	K	TRINITY_DN100242_c0_g1|g.405 ORF TRINITY_DN100242_c0_g1|g.405 TRINITY_DN100242_c0_g1_m.405 type:complete len:269 (+) TRINITY_DN100242_c0_g1:89-895(+)	1	3.29085e-05	81.799	TISIVDNELAVK(1)R	2	3.4148	1
	TRINITY_DN100270_c1_g1_m.453	300	K	TRINITY_DN100270_c1_g1|g.453 ORF TRINITY_DN100270_c1_g1|g.453 TRINITY_DN100270_c1_g1_m.453 type:5prime_partial len:469 (+) TRINITY_DN100270_c1_g1:3-1409(+)	1	0.0101295	56.378	MAK(1)QAMER	2	0.93315	1
	TRINITY_DN100270_c1_g1_m.453	55	K	TRINITY_DN100270_c1_g1|g.453 ORF TRINITY_DN100270_c1_g1|g.453 TRINITY_DN100270_c1_g1_m.453 type:5prime_partial len:469 (+) TRINITY_DN100270_c1_g1:3-1409(+)	1	4.80171e-05	85.821	GEPPSVVALAK(1)WR	2	0.39167	1
	TRINITY_DN100329_c0_g2_m.571	282	K	TRINITY_DN100329_c0_g2|g.571 ORF TRINITY_DN100329_c0_g2|g.571 TRINITY_DN100329_c0_g2_m.571 type:internal len:301 (+) TRINITY_DN100329_c0_g2:3-902(+)	1	2.42853e-08	114.93	HYK(1)GEHTYVPVTLK	3	1.7102	2
	TRINITY_DN100329_c0_g2_m.571	264	K	TRINITY_DN100329_c0_g2|g.571 ORF TRINITY_DN100329_c0_g2|g.571 TRINITY_DN100329_c0_g2_m.571 type:internal len:301 (+) TRINITY_DN100329_c0_g2:3-902(+)	1	6.88712e-14	112.68	NSK(1)DGEGGELVFGGSDPK	2	-1.8267	1
	TRINITY_DN100408_c0_g1_m.709	178	K	TRINITY_DN100408_c0_g1|g.709 ORF TRINITY_DN100408_c0_g1|g.709 TRINITY_DN100408_c0_g1_m.709 type:complete len:540 (+) TRINITY_DN100408_c0_g1:151-1770(+)	1	0.0293371	40.386	LK(1)VEPLLDK	2	-0.36496	1
	TRINITY_DN100479_c0_g1_m.827	191	K	TRINITY_DN100479_c0_g1|g.827 ORF TRINITY_DN100479_c0_g1|g.827 TRINITY_DN100479_c0_g1_m.827 type:complete len:320 (+) TRINITY_DN100479_c0_g1:185-1144(+)	1	0.00287286	50.314	FLTYHEPAPILIPK(1)DK	3	-3.7271	1
	TRINITY_DN100479_c0_g1_m.827	7	K	TRINITY_DN100479_c0_g1|g.827 ORF TRINITY_DN100479_c0_g1|g.827 TRINITY_DN100479_c0_g1_m.827 type:complete len:320 (+) TRINITY_DN100479_c0_g1:185-1144(+)	1	4.51114e-08	121.67	MEIGTIK(1)HR	2	-1.2963	1
	TRINITY_DN100479_c0_g1_m.827	277	K	TRINITY_DN100479_c0_g1|g.827 ORF TRINITY_DN100479_c0_g1|g.827 TRINITY_DN100479_c0_g1_m.827 type:complete len:320 (+) TRINITY_DN100479_c0_g1:185-1144(+)	1	0.0011467	67.881	VQEYVQK(1)GGFK	2	-0.77739	1
	TRINITY_DN100479_c0_g1_m.827	223	K	TRINITY_DN100479_c0_g1|g.827 ORF TRINITY_DN100479_c0_g1|g.827 TRINITY_DN100479_c0_g1_m.827 type:complete len:320 (+) TRINITY_DN100479_c0_g1:185-1144(+)	1	0.0386173	46.068	FNK(1)SGFTGGLNYYR	2	1.6765	1
	TRINITY_DN100491_c0_g1_m.854	913	K	TRINITY_DN100491_c0_g1|g.854 ORF TRINITY_DN100491_c0_g1|g.854 TRINITY_DN100491_c0_g1_m.854 type:5prime_partial len:1083 (+) TRINITY_DN100491_c0_g1:3-3251(+)	1	5.03848e-05	90.142	IDPLGEGAK(1)WR	2	0.50284	1
	TRINITY_DN100491_c0_g1_m.854	446	K	TRINITY_DN100491_c0_g1|g.854 ORF TRINITY_DN100491_c0_g1|g.854 TRINITY_DN100491_c0_g1_m.854 type:5prime_partial len:1083 (+) TRINITY_DN100491_c0_g1:3-3251(+)	1	0.00431026	65.313	QLEFLK(1)GR	2	-1.294	1
	TRINITY_DN100491_c0_g1_m.854	372	K	TRINITY_DN100491_c0_g1|g.854 ORF TRINITY_DN100491_c0_g1|g.854 TRINITY_DN100491_c0_g1_m.854 type:5prime_partial len:1083 (+) TRINITY_DN100491_c0_g1:3-3251(+)	1	0.0109189	58.916	FIHYVNK(1)DGR	2	-2.0768	2
	TRINITY_DN100505_c0_g1_m.878	100	K	TRINITY_DN100505_c0_g1|g.878 ORF TRINITY_DN100505_c0_g1|g.878 TRINITY_DN100505_c0_g1_m.878 type:complete len:212 (+) TRINITY_DN100505_c0_g1:499-1134(+)	1	0.000639421	72.365	PLVSFEDVK(1)K	2	2.3784	1
	TRINITY_DN100581_c0_g1_m.1039	137	K	TRINITY_DN100581_c0_g1|g.1039 ORF TRINITY_DN100581_c0_g1|g.1039 TRINITY_DN100581_c0_g1_m.1039 type:5prime_partial len:520 (+) TRINITY_DN100581_c0_g1:1-1560(+)	1	0.0340276	45.489	IGSSWAVK(1)K	2	-1.0808	1
	TRINITY_DN100581_c0_g1_m.1039	145	K	TRINITY_DN100581_c0_g1|g.1039 ORF TRINITY_DN100581_c0_g1|g.1039 TRINITY_DN100581_c0_g1_m.1039 type:5prime_partial len:520 (+) TRINITY_DN100581_c0_g1:1-1560(+)	1	0.00632716	45.939	LVEIGK(1)QGVSR	2	0.99	1
	TRINITY_DN100581_c0_g1_m.1039	89	K	TRINITY_DN100581_c0_g1|g.1039 ORF TRINITY_DN100581_c0_g1|g.1039 TRINITY_DN100581_c0_g1_m.1039 type:5prime_partial len:520 (+) TRINITY_DN100581_c0_g1:1-1560(+)	1	0.0118606	62.88	WFLK(1)EEGR	2	-3.2956	1
	TRINITY_DN100616_c1_g1_m.1117	486	K	TRINITY_DN100616_c1_g1|g.1117 ORF TRINITY_DN100616_c1_g1|g.1117 TRINITY_DN100616_c1_g1_m.1117 type:5prime_partial len:518 (+) TRINITY_DN100616_c1_g1:3-1556(+)	1	4.77648e-05	88.181	VALLHLGK(1)LGAK	2	2.4471	2
	TRINITY_DN100616_c1_g1_m.1117	369	K	TRINITY_DN100616_c1_g1|g.1117 ORF TRINITY_DN100616_c1_g1|g.1117 TRINITY_DN100616_c1_g1_m.1117 type:5prime_partial len:518 (+) TRINITY_DN100616_c1_g1:3-1556(+)	1	0.000421153	88.181	DIIMVDHMK(1)K	2	0.47818	1
	TRINITY_DN100616_c1_g1_m.1117	307	K	TRINITY_DN100616_c1_g1|g.1117 ORF TRINITY_DN100616_c1_g1|g.1117 TRINITY_DN100616_c1_g1_m.1117 type:5prime_partial len:518 (+) TRINITY_DN100616_c1_g1:3-1556(+)	1	4.44404e-14	97.949	VAVVCGYGDVGK(1)GCAAALK	2	-1.76	1
	TRINITY_DN100616_c1_g1_m.1117	314	K	TRINITY_DN100616_c1_g1|g.1117 ORF TRINITY_DN100616_c1_g1|g.1117 TRINITY_DN100616_c1_g1_m.1117 type:5prime_partial len:518 (+) TRINITY_DN100616_c1_g1:3-1556(+)	1	7.28872e-07	83.438	GCAAALK(1)SAGAR	2	0.34892	1
	TRINITY_DN100616_c1_g1_m.1117	417	K	TRINITY_DN100616_c1_g1|g.1117 ORF TRINITY_DN100616_c1_g1|g.1117 TRINITY_DN100616_c1_g1_m.1117 type:5prime_partial len:518 (+) TRINITY_DN100616_c1_g1:3-1556(+)	1	0.00190365	62.454	WVFPDTNK(1)GIIVLAEGR	2	5.0615	1
	TRINITY_DN100616_c1_g1_m.1117	243	K	TRINITY_DN100616_c1_g1|g.1117 ORF TRINITY_DN100616_c1_g1|g.1117 TRINITY_DN100616_c1_g1_m.1117 type:5prime_partial len:518 (+) TRINITY_DN100616_c1_g1:3-1556(+)	1	7.05213e-25	244.74	LVGVSEETTTGVK(1)R	2	-0.43994	1
	TRINITY_DN100616_c1_g1_m.1117	191	K	TRINITY_DN100616_c1_g1|g.1117 ORF TRINITY_DN100616_c1_g1|g.1117 TRINITY_DN100616_c1_g1_m.1117 type:5prime_partial len:518 (+) TRINITY_DN100616_c1_g1:3-1556(+)	1	0.00188593	61.48	AEEEYEK(1)TGK	2	0.9549	1
	TRINITY_DN100616_c1_g1_m.1117	49	K	TRINITY_DN100616_c1_g1|g.1117 ORF TRINITY_DN100616_c1_g1|g.1117 TRINITY_DN100616_c1_g1_m.1117 type:5prime_partial len:518 (+) TRINITY_DN100616_c1_g1:3-1556(+)	1	0.000696467	106	VK(1)DMSQADFGR	2	0.5081	2
	TRINITY_DN100616_c1_g1_m.1117	493	K	TRINITY_DN100616_c1_g1|g.1117 ORF TRINITY_DN100616_c1_g1|g.1117 TRINITY_DN100616_c1_g1_m.1117 type:5prime_partial len:518 (+) TRINITY_DN100616_c1_g1:3-1556(+)	1	1.57328e-09	98.942	LTK(1)LSPAQAEYISVPVEGPYKPPHYR	4	1.134	1
	TRINITY_DN100616_c1_g1_m.1117	478	K	TRINITY_DN100616_c1_g1|g.1117 ORF TRINITY_DN100616_c1_g1|g.1117 TRINITY_DN100616_c1_g1_m.1117 type:5prime_partial len:518 (+) TRINITY_DN100616_c1_g1:3-1556(+)	1	2.17955e-05	115.04	HLDEK(1)VALLHLGK	2	-1.4027	2
	TRINITY_DN100616_c1_g1_m.1117	404	K	TRINITY_DN100616_c1_g1|g.1117 ORF TRINITY_DN100616_c1_g1|g.1117 TRINITY_DN100616_c1_g1_m.1117 type:5prime_partial len:518 (+) TRINITY_DN100616_c1_g1:3-1556(+)	1	0.00360836	79.059	ITIK(1)PQTDR	2	1.4666	1
	TRINITY_DN100616_c1_g1_m.1117	473	K	TRINITY_DN100616_c1_g1|g.1117 ORF TRINITY_DN100616_c1_g1|g.1117 TRINITY_DN100616_c1_g1_m.1117 type:5prime_partial len:518 (+) TRINITY_DN100616_c1_g1:3-1556(+)	1	8.30763e-07	141.29	VYVLPK(1)HLDEK	2	-0.46679	3
	TRINITY_DN100642_c1_g1_m.1168	203	K	TRINITY_DN100642_c1_g1|g.1168 ORF TRINITY_DN100642_c1_g1|g.1168 TRINITY_DN100642_c1_g1_m.1168 type:complete len:242 (+) TRINITY_DN100642_c1_g1:228-953(+)	1	0.0169449	60.709	IK(1)LSPWFR	2	-0.44716	1
	TRINITY_DN100642_c1_g1_m.1168	235	K	TRINITY_DN100642_c1_g1|g.1168 ORF TRINITY_DN100642_c1_g1|g.1168 TRINITY_DN100642_c1_g1_m.1168 type:complete len:242 (+) TRINITY_DN100642_c1_g1:228-953(+)	1	0.00285014	65.879	GTLHEAANMK(1)AIHK	3	2.3574	1
	TRINITY_DN100650_c4_g2_m.1181	188	K	TRINITY_DN100650_c4_g2|g.1181 ORF TRINITY_DN100650_c4_g2|g.1181 TRINITY_DN100650_c4_g2_m.1181 type:complete len:393 (+) TRINITY_DN100650_c4_g2:120-1298(+)	1	0.00397505	51.569	VHFATVANLK(1)DPLIAK	3	-4.317	1
	TRINITY_DN100650_c4_g2_m.1182	118	K	TRINITY_DN100650_c4_g2|g.1182 ORF TRINITY_DN100650_c4_g2|g.1182 TRINITY_DN100650_c4_g2_m.1182 type:complete len:137 (+) TRINITY_DN100650_c4_g2:1564-1974(+)	1	0.0202693	40.83	IPSGLSFDK(1)LEPEAHR	3	3.571	1
	TRINITY_DN100654_c2_g1_m.1189	128	K	TRINITY_DN100654_c2_g1|g.1189 ORF TRINITY_DN100654_c2_g1|g.1189 TRINITY_DN100654_c2_g1_m.1189 type:internal len:475 (-) TRINITY_DN100654_c2_g1:2-1423(-)	1	5.41138e-09	158.61	VK(1)QFLFNLLK	2	1.6929	1
	TRINITY_DN100699_c0_g1_m.1283	228	K	TRINITY_DN100699_c0_g1|g.1283 ORF TRINITY_DN100699_c0_g1|g.1283 TRINITY_DN100699_c0_g1_m.1283 type:complete len:796 (+) TRINITY_DN100699_c0_g1:329-2716(+)	1	4.32995e-05	83.474	NYPLAVK(1)LGTLSADLEK	2	2.8009	1
	TRINITY_DN100699_c0_g1_m.1283	338	K	TRINITY_DN100699_c0_g1|g.1283 ORF TRINITY_DN100699_c0_g1|g.1283 TRINITY_DN100699_c0_g1_m.1283 type:complete len:796 (+) TRINITY_DN100699_c0_g1:329-2716(+)	1	0.0171047	67.464	YYK(1)EQNLK	2	-0.60612	1
	TRINITY_DN100752_c1_g1_m.1377	439	K	TRINITY_DN100752_c1_g1|g.1377 ORF TRINITY_DN100752_c1_g1|g.1377 TRINITY_DN100752_c1_g1_m.1377 type:complete len:505 (+) TRINITY_DN100752_c1_g1:157-1671(+)	1	0.00699012	69.905	AK(1)LDDNAR	2	0.95618	1
	TRINITY_DN100752_c1_g1_m.1377	468	K	TRINITY_DN100752_c1_g1|g.1377 ORF TRINITY_DN100752_c1_g1|g.1377 TRINITY_DN100752_c1_g1_m.1377 type:complete len:505 (+) TRINITY_DN100752_c1_g1:157-1671(+)	1	0.000277206	85.821	MTK(1)DLALIVHGPK	2	-2.7262	1
	TRINITY_DN100752_c1_g1_m.1377	330	K	TRINITY_DN100752_c1_g1|g.1377 ORF TRINITY_DN100752_c1_g1|g.1377 TRINITY_DN100752_c1_g1_m.1377 type:complete len:505 (+) TRINITY_DN100752_c1_g1:157-1671(+)	1	0.00314666	73.891	WK(1)SQFDASGIWYEHR	3	-0.87065	1
	TRINITY_DN100752_c1_g1_m.1377	478	K	TRINITY_DN100752_c1_g1|g.1377 ORF TRINITY_DN100752_c1_g1|g.1377 TRINITY_DN100752_c1_g1_m.1377 type:complete len:505 (+) TRINITY_DN100752_c1_g1:157-1671(+)	1	0.0448362	48.701	DLALIVHGPK(1)VTR	2	0.68574	1
	TRINITY_DN100752_c1_g1_m.1377	297	K	TRINITY_DN100752_c1_g1|g.1377 ORF TRINITY_DN100752_c1_g1|g.1377 TRINITY_DN100752_c1_g1_m.1377 type:complete len:505 (+) TRINITY_DN100752_c1_g1:157-1671(+)	1	6.31959e-08	84.309	AFAESSMNTAYQK(1)K	2	-1.0534	1
	TRINITY_DN100763_c0_g1_m.1391	685	K	TRINITY_DN100763_c0_g1|g.1391 ORF TRINITY_DN100763_c0_g1|g.1391 TRINITY_DN100763_c0_g1_m.1391 type:complete len:980 (+) TRINITY_DN100763_c0_g1:104-3043(+)	1	0.00325952	67.464	MK(1)VVSLVR	2	-3.8658	1
	TRINITY_DN100763_c0_g1_m.1391	272	K	TRINITY_DN100763_c0_g1|g.1391 ORF TRINITY_DN100763_c0_g1|g.1391 TRINITY_DN100763_c0_g1_m.1391 type:complete len:980 (+) TRINITY_DN100763_c0_g1:104-3043(+)	1	0.0016008	64.064	K(1)HWIGGENIK	2	-0.089634	1
	TRINITY_DN100763_c0_g1_m.1391	605	K	TRINITY_DN100763_c0_g1|g.1391 ORF TRINITY_DN100763_c0_g1|g.1391 TRINITY_DN100763_c0_g1_m.1391 type:complete len:980 (+) TRINITY_DN100763_c0_g1:104-3043(+)	1	0.00146426	99.855	K(1)DVFNSFYR	2	1.3586	1
	TRINITY_DN100763_c0_g1_m.1391	412	K	TRINITY_DN100763_c0_g1|g.1391 ORF TRINITY_DN100763_c0_g1|g.1391 TRINITY_DN100763_c0_g1_m.1391 type:complete len:980 (+) TRINITY_DN100763_c0_g1:104-3043(+)	1	2.60357e-06	106.35	ILIDLK(1)GLSWK	2	0.127	1
	TRINITY_DN100763_c0_g1_m.1391	310	K	TRINITY_DN100763_c0_g1|g.1391 ORF TRINITY_DN100763_c0_g1|g.1391 TRINITY_DN100763_c0_g1_m.1391 type:complete len:980 (+) TRINITY_DN100763_c0_g1:104-3043(+)	1	0.00106977	69.327	VPAK(1)DFDLEAFNAGK	2	1.5319	1
	TRINITY_DN100763_c0_g1_m.1391	655	K	TRINITY_DN100763_c0_g1|g.1391 ORF TRINITY_DN100763_c0_g1|g.1391 TRINITY_DN100763_c0_g1_m.1391 type:complete len:980 (+) TRINITY_DN100763_c0_g1:104-3043(+)	0.997205	0.000134803	78.888	WIGTEDWVVK(0.997)TENLEELK(0.003)K	3	1.9569	1
	TRINITY_DN100763_c0_g1_m.1391	295	K	TRINITY_DN100763_c0_g1|g.1391 ORF TRINITY_DN100763_c0_g1|g.1391 TRINITY_DN100763_c0_g1_m.1391 type:complete len:980 (+) TRINITY_DN100763_c0_g1:104-3043(+)	1	0.032544	69.905	TK(1)TTLNLR	2	-0.79136	1
	TRINITY_DN100763_c0_g1_m.1391	762	K	TRINITY_DN100763_c0_g1|g.1391 ORF TRINITY_DN100763_c0_g1|g.1391 TRINITY_DN100763_c0_g1_m.1391 type:complete len:980 (+) TRINITY_DN100763_c0_g1:104-3043(+)	1	0.00214173	72.038	AFATYVQAK(1)R	2	-0.083118	1
	TRINITY_DN100763_c0_g1_m.1391	220	K	TRINITY_DN100763_c0_g1|g.1391 ORF TRINITY_DN100763_c0_g1|g.1391 TRINITY_DN100763_c0_g1_m.1391 type:complete len:980 (+) TRINITY_DN100763_c0_g1:104-3043(+)	1	2.13569e-10	148.76	YK(1)YGLFQQTITK	2	-0.76364	1
	TRINITY_DN100763_c0_g1_m.1391	956	K	TRINITY_DN100763_c0_g1|g.1391 ORF TRINITY_DN100763_c0_g1|g.1391 TRINITY_DN100763_c0_g1_m.1391 type:complete len:980 (+) TRINITY_DN100763_c0_g1:104-3043(+)	1	1.42265e-13	126.17	MSILNTAGSHK(1)FSSDR	3	-0.3167	3
	TRINITY_DN100763_c0_g1_m.1391	664	K	TRINITY_DN100763_c0_g1|g.1391 ORF TRINITY_DN100763_c0_g1|g.1391 TRINITY_DN100763_c0_g1_m.1391 type:complete len:980 (+) TRINITY_DN100763_c0_g1:104-3043(+)	1	0.000473587	72.327	K(1)HADNEDLHMEWR	3	-1.4354	1
	TRINITY_DN100763_c0_g1_m.1391	506	K	TRINITY_DN100763_c0_g1|g.1391 ORF TRINITY_DN100763_c0_g1|g.1391 TRINITY_DN100763_c0_g1_m.1391 type:complete len:980 (+) TRINITY_DN100763_c0_g1:104-3043(+)	1	0.00328683	55.782	ILDNVDFPDSVVELFNK(1)AK	2	2.7507	1
	TRINITY_DN100763_c0_g1_m.1391	321	K	TRINITY_DN100763_c0_g1|g.1391 ORF TRINITY_DN100763_c0_g1|g.1391 TRINITY_DN100763_c0_g1_m.1391 type:complete len:980 (+) TRINITY_DN100763_c0_g1:104-3043(+)	1	4.01969e-09	99.127	DFDLEAFNAGK(1)HNQANEAHANAEK	3	-1.3676	1
	TRINITY_DN100763_c0_g1_m.1391	293	K	TRINITY_DN100763_c0_g1|g.1391 ORF TRINITY_DN100763_c0_g1|g.1391 TRINITY_DN100763_c0_g1_m.1391 type:complete len:980 (+) TRINITY_DN100763_c0_g1:104-3043(+)	1	0.000142517	74.524	AIAYDVPIPGFK(1)TK	2	1.4338	1
	TRINITY_DN100763_c0_g1_m.1391	508	K	TRINITY_DN100763_c0_g1|g.1391 ORF TRINITY_DN100763_c0_g1|g.1391 TRINITY_DN100763_c0_g1_m.1391 type:complete len:980 (+) TRINITY_DN100763_c0_g1:104-3043(+)	1	0.000562159	129.72	AK(1)TISEVK	2	-0.83171	1
	TRINITY_DN100763_c0_g1_m.1391	732	K	TRINITY_DN100763_c0_g1|g.1391 ORF TRINITY_DN100763_c0_g1|g.1391 TRINITY_DN100763_c0_g1_m.1391 type:complete len:980 (+) TRINITY_DN100763_c0_g1:104-3043(+)	1	0.00727628	78.816	MK(1)EMSAQER	2	0.18663	1
	TRINITY_DN100853_c0_g1_m.1554	38	K	TRINITY_DN100853_c0_g1|g.1554 ORF TRINITY_DN100853_c0_g1|g.1554 TRINITY_DN100853_c0_g1_m.1554 type:complete len:426 (+) TRINITY_DN100853_c0_g1:290-1567(+)	1	0.00118941	52.201	LPSLPK(1)QLEGVVSHEK	3	0.49758	1
	TRINITY_DN100853_c0_g1_m.1554	231	K	TRINITY_DN100853_c0_g1|g.1554 ORF TRINITY_DN100853_c0_g1|g.1554 TRINITY_DN100853_c0_g1_m.1554 type:complete len:426 (+) TRINITY_DN100853_c0_g1:290-1567(+)	1	0.0241972	41.796	LAASLK(1)FPLK	2	-4.7477	1
	TRINITY_DN100871_c1_g2_m.1578	134	K	TRINITY_DN100871_c1_g2|g.1578 ORF TRINITY_DN100871_c1_g2|g.1578 TRINITY_DN100871_c1_g2_m.1578 type:complete len:242 (+) TRINITY_DN100871_c1_g2:465-1190(+)	1	0.0062987	53.028	TQLEESK(1)IER	2	-1.3276	1
	TRINITY_DN100950_c0_g1_m.1717	83	K	TRINITY_DN100950_c0_g1|g.1717 ORF TRINITY_DN100950_c0_g1|g.1717 TRINITY_DN100950_c0_g1_m.1717 type:complete len:303 (+) TRINITY_DN100950_c0_g1:172-1080(+)	1	2.23051e-06	97.084	AVLK(1)FAQYTGAHPIAGR	2	-4.1295	2
	TRINITY_DN100950_c0_g1_m.1717	51	K	TRINITY_DN100950_c0_g1|g.1717 ORF TRINITY_DN100950_c0_g1|g.1717 TRINITY_DN100950_c0_g1_m.1717 type:complete len:303 (+) TRINITY_DN100950_c0_g1:172-1080(+)	1	2.79964e-09	140.05	TWEK(1)IQLAAR	2	-1.8356	1
	TRINITY_DN100950_c0_g1_m.1717	188	K	TRINITY_DN100950_c0_g1|g.1717 ORF TRINITY_DN100950_c0_g1|g.1717 TRINITY_DN100950_c0_g1_m.1717 type:complete len:303 (+) TRINITY_DN100950_c0_g1:172-1080(+)	1	5.76447e-21	180.11	GTIAPGHK(1)WDVMVDLFFHR	3	1.3124	1
	TRINITY_DN100950_c0_g1_m.1717	160	K	TRINITY_DN100950_c0_g1|g.1717 ORF TRINITY_DN100950_c0_g1|g.1717 TRINITY_DN100950_c0_g1_m.1717 type:complete len:303 (+) TRINITY_DN100950_c0_g1:172-1080(+)	1	0.000889772	72.365	FVDIGIPANNK(1)GK	2	1.058	1
	TRINITY_DN100950_c0_g1_m.1717	47	K	TRINITY_DN100950_c0_g1|g.1717 ORF TRINITY_DN100950_c0_g1|g.1717 TRINITY_DN100950_c0_g1_m.1717 type:complete len:303 (+) TRINITY_DN100950_c0_g1:172-1080(+)	1	0.00387648	56.938	TDGIYIINLGK(1)TWEK	2	2.8251	1
	TRINITY_DN100960_c1_g4_m.1734	126	K	TRINITY_DN100960_c1_g4|g.1734 ORF TRINITY_DN100960_c1_g4|g.1734 TRINITY_DN100960_c1_g4_m.1734 type:complete len:278 (+) TRINITY_DN100960_c1_g4:295-1128(+)	1	8.93995e-05	99.276	NK(1)HNEVETEIIK	2	-3.2167	1
	TRINITY_DN101011_c6_g1_m.1843	246	K	TRINITY_DN101011_c6_g1|g.1843 ORF TRINITY_DN101011_c6_g1|g.1843 TRINITY_DN101011_c6_g1_m.1843 type:5prime_partial len:431 (+) TRINITY_DN101011_c6_g1:1-1293(+)	1	7.92455e-05	106.11	FK(1)DIFQEVYESK	2	2.2042	1
	TRINITY_DN101011_c6_g1_m.1843	225	K	TRINITY_DN101011_c6_g1|g.1843 ORF TRINITY_DN101011_c6_g1|g.1843 TRINITY_DN101011_c6_g1_m.1843 type:5prime_partial len:431 (+) TRINITY_DN101011_c6_g1:1-1293(+)	1	4.48044e-09	127.03	AFADASMNTAFQK(1)K	2	-3.0733	2
	TRINITY_DN101011_c6_g1_m.1843	234	K	TRINITY_DN101011_c6_g1|g.1843 ORF TRINITY_DN101011_c6_g1|g.1843 TRINITY_DN101011_c6_g1_m.1843 type:5prime_partial len:431 (+) TRINITY_DN101011_c6_g1:1-1293(+)	1	0.00833605	52.863	WPLYLSTK(1)NTILK	2	1.7465	1
	TRINITY_DN101011_c6_g1_m.1843	139	K	TRINITY_DN101011_c6_g1|g.1843 ORF TRINITY_DN101011_c6_g1|g.1843 TRINITY_DN101011_c6_g1_m.1843 type:5prime_partial len:431 (+) TRINITY_DN101011_c6_g1:1-1293(+)	1	0.00141899	86.205	EPILCK(1)NVPR	2	1.9132	1
	TRINITY_DN101011_c6_g1_m.1843	396	K	TRINITY_DN101011_c6_g1|g.1843 ORF TRINITY_DN101011_c6_g1|g.1843 TRINITY_DN101011_c6_g1_m.1843 type:5prime_partial len:431 (+) TRINITY_DN101011_c6_g1:1-1293(+)	1	4.2913e-08	90.156	MTK(1)DLALIIHGSNLK	2	-0.81015	2
	TRINITY_DN101011_c6_g1_m.1843	79	K	TRINITY_DN101011_c6_g1|g.1843 ORF TRINITY_DN101011_c6_g1|g.1843 TRINITY_DN101011_c6_g1_m.1843 type:5prime_partial len:431 (+) TRINITY_DN101011_c6_g1:1-1293(+)	1	6.88208e-05	74.733	DSTDDK(1)VTVESAEATLK	2	-1.2098	1
	TRINITY_DN101011_c6_g1_m.1843	258	K	TRINITY_DN101011_c6_g1|g.1843 ORF TRINITY_DN101011_c6_g1|g.1843 TRINITY_DN101011_c6_g1_m.1843 type:5prime_partial len:431 (+) TRINITY_DN101011_c6_g1:1-1293(+)	1	8.26033e-09	168.43	WK(1)SLFEDSGIWYEHR	3	1.352	1
	TRINITY_DN101011_c6_g1_m.1843	408	K	TRINITY_DN101011_c6_g1|g.1843 ORF TRINITY_DN101011_c6_g1|g.1843 TRINITY_DN101011_c6_g1_m.1843 type:5prime_partial len:431 (+) TRINITY_DN101011_c6_g1:1-1293(+)	1	5.09493e-11	104.04	DLALIIHGSNLK(1)R	2	1.9761	1
	TRINITY_DN101011_c6_g1_m.1843	177	K	TRINITY_DN101011_c6_g1|g.1843 ORF TRINITY_DN101011_c6_g1|g.1843 TRINITY_DN101011_c6_g1_m.1843 type:5prime_partial len:431 (+) TRINITY_DN101011_c6_g1:1-1293(+)	1	0.0515963	43.734	LK(1)LVFEGK	2	-4.2562	1
	TRINITY_DN101011_c6_g1_m.1843	256	K	TRINITY_DN101011_c6_g1|g.1843 ORF TRINITY_DN101011_c6_g1|g.1843 TRINITY_DN101011_c6_g1_m.1843 type:5prime_partial len:431 (+) TRINITY_DN101011_c6_g1:1-1293(+)	1	0.000456904	57.293	DIFQEVYESK(1)WK	2	2.1778	1
	TRINITY_DN101011_c6_g1_m.1843	96	K	TRINITY_DN101011_c6_g1|g.1843 ORF TRINITY_DN101011_c6_g1|g.1843 TRINITY_DN101011_c6_g1_m.1843 type:5prime_partial len:431 (+) TRINITY_DN101011_c6_g1:1-1293(+)	1	0.0102049	58.338	YNVAIK(1)CATITPDEAR	2	-1.9693	1
	TRINITY_DN101011_c6_g1_m.1843	29	K	TRINITY_DN101011_c6_g1|g.1843 ORF TRINITY_DN101011_c6_g1|g.1843 TRINITY_DN101011_c6_g1_m.1843 type:5prime_partial len:431 (+) TRINITY_DN101011_c6_g1:1-1293(+)	1	4.60279e-09	99.909	IK(1)VTSPIVEMDGDEMTR	2	-0.95605	1
	TRINITY_DN101048_c1_g1_m.1917	328	K	TRINITY_DN101048_c1_g1|g.1917 ORF TRINITY_DN101048_c1_g1|g.1917 TRINITY_DN101048_c1_g1_m.1917 type:complete len:364 (+) TRINITY_DN101048_c1_g1:149-1240(+)	1	0.000523254	91.245	LESLK(1)LNSSDAALK	2	-0.57622	1
	TRINITY_DN101113_c0_g1_m.2042	355	K	TRINITY_DN101113_c0_g1|g.2042 ORF TRINITY_DN101113_c0_g1|g.2042 TRINITY_DN101113_c0_g1_m.2042 type:complete len:773 (+) TRINITY_DN101113_c0_g1:136-2454(+)	1	0.00158839	62.271	LYAVSTTSTSK(1)R	2	-0.77909	1
	TRINITY_DN101186_c1_g1_m.2184	182	K	TRINITY_DN101186_c1_g1|g.2184 ORF TRINITY_DN101186_c1_g1|g.2184 TRINITY_DN101186_c1_g1_m.2184 type:complete len:532 (+) TRINITY_DN101186_c1_g1:85-1680(+)	1	4.1982e-05	96.946	YK(1)VIILDEAHER	2	-3.7853	1
	TRINITY_DN101261_c2_g1_m.2346	140	K	TRINITY_DN101261_c2_g1|g.2346 ORF TRINITY_DN101261_c2_g1|g.2346 TRINITY_DN101261_c2_g1_m.2346 type:complete len:339 (+) TRINITY_DN101261_c2_g1:479-1495(+)	1	0.00754938	81.642	EISHQFK(1)VK	2	-1.3142	1
	TRINITY_DN101354_c0_g2_m.2518	27	K	TRINITY_DN101354_c0_g2|g.2518 ORF TRINITY_DN101354_c0_g2|g.2518 TRINITY_DN101354_c0_g2_m.2518 type:complete len:307 (+) TRINITY_DN101354_c0_g2:138-1058(+)	1	0.00253295	68.108	HIVAASAK(1)LGHATFVLVR	3	0.5015	1
	TRINITY_DN101354_c0_g2_m.2518	234	K	TRINITY_DN101354_c0_g2|g.2518 ORF TRINITY_DN101354_c0_g2|g.2518 TRINITY_DN101354_c0_g2_m.2518 type:complete len:307 (+) TRINITY_DN101354_c0_g2:138-1058(+)	1	0.00838461	81.163	TGK(1)TLER	2	0.63218	2
	TRINITY_DN101354_c0_g2_m.2518	7	K	TRINITY_DN101354_c0_g2|g.2518 ORF TRINITY_DN101354_c0_g2|g.2518 TRINITY_DN101354_c0_g2_m.2518 type:complete len:307 (+) TRINITY_DN101354_c0_g2:138-1058(+)	1	0.00585624	55.604	SK(1)ILIIGGTGYIGK	2	1.3213	1
	TRINITY_DN101354_c0_g2_m.2518	107	K	TRINITY_DN101354_c0_g2|g.2518 ORF TRINITY_DN101354_c0_g2|g.2518 TRINITY_DN101354_c0_g2_m.2518 type:complete len:307 (+) TRINITY_DN101354_c0_g2:138-1058(+)	1	0.0068432	105.22	ETGNIK(1)R	2	0.27809	1
	TRINITY_DN101367_c0_g1_m.2542	1114	K	TRINITY_DN101367_c0_g1|g.2542 ORF TRINITY_DN101367_c0_g1|g.2542 TRINITY_DN101367_c0_g1_m.2542 type:complete len:1396 (+) TRINITY_DN101367_c0_g1:95-4282(+)	1	0.0413794	47.334	TIGSK(1)LEASLAR	2	0.26893	1
	TRINITY_DN101367_c0_g1_m.2542	168	K	TRINITY_DN101367_c0_g1|g.2542 ORF TRINITY_DN101367_c0_g1|g.2542 TRINITY_DN101367_c0_g1_m.2542 type:complete len:1396 (+) TRINITY_DN101367_c0_g1:95-4282(+)	1	0.0285717	45.489	LPSSK(1)LPR	2	-0.12336	1
	TRINITY_DN101367_c0_g1_m.2542	1153	K	TRINITY_DN101367_c0_g1|g.2542 ORF TRINITY_DN101367_c0_g1|g.2542 TRINITY_DN101367_c0_g1_m.2542 type:complete len:1396 (+) TRINITY_DN101367_c0_g1:95-4282(+)	1	0.00883232	55.782	SNLESSVVPAFEK(1)SSR	2	-3.6378	1
	TRINITY_DN101438_c0_g1_m.2694	540	K	TRINITY_DN101438_c0_g1|g.2694 ORF TRINITY_DN101438_c0_g1|g.2694 TRINITY_DN101438_c0_g1_m.2694 type:complete len:617 (+) TRINITY_DN101438_c0_g1:169-2019(+)	1	0.0113576	64.064	AAGEVLALQK(1)R	2	-2.4119	1
	TRINITY_DN101443_c1_g2_m.2706	138	K	TRINITY_DN101443_c1_g2|g.2706 ORF TRINITY_DN101443_c1_g2|g.2706 TRINITY_DN101443_c1_g2_m.2706 type:5prime_partial len:201 (+) TRINITY_DN101443_c1_g2:1-603(+)	1	0.00019415	80.128	NMGEILK(1)ASGASYSSVVK	2	-4.6229	1
	TRINITY_DN101450_c0_g1_m.2721	100	K	TRINITY_DN101450_c0_g1|g.2721 ORF TRINITY_DN101450_c0_g1|g.2721 TRINITY_DN101450_c0_g1_m.2721 type:complete len:393 (+) TRINITY_DN101450_c0_g1:186-1364(+)	1	3.10392e-17	185.9	AK(1)GEAFEEIVGLAR	2	1.7385	1
	TRINITY_DN101471_c1_g1_m.2763	505	K	TRINITY_DN101471_c1_g1|g.2763 ORF TRINITY_DN101471_c1_g1|g.2763 TRINITY_DN101471_c1_g1_m.2763 type:complete len:905 (+) TRINITY_DN101471_c1_g1:1572-4286(+)	1	0.0315907	63.908	QISTAVSGPVTK(1)EGR	2	3.0714	1
	TRINITY_DN101541_c4_g1_m.2910	272	K	TRINITY_DN101541_c4_g1|g.2910 ORF TRINITY_DN101541_c4_g1|g.2910 TRINITY_DN101541_c4_g1_m.2910 type:complete len:514 (+) TRINITY_DN101541_c4_g1:152-1693(+)	1	0.00605752	61.494	SYK(1)PNPR	2	1.6559	1
	TRINITY_DN101541_c4_g1_m.2910	413	K	TRINITY_DN101541_c4_g1|g.2910 ORF TRINITY_DN101541_c4_g1|g.2910 TRINITY_DN101541_c4_g1_m.2910 type:complete len:514 (+) TRINITY_DN101541_c4_g1:152-1693(+)	1	1.06608e-09	150.53	AALSDDYFVK(1)R	2	0.86355	1
	TRINITY_DN101541_c4_g1_m.2910	369	K	TRINITY_DN101541_c4_g1|g.2910 ORF TRINITY_DN101541_c4_g1|g.2910 TRINITY_DN101541_c4_g1_m.2910 type:complete len:514 (+) TRINITY_DN101541_c4_g1:152-1693(+)	1	0.0097329	74.486	VYK(1)NYDPR	2	-0.46196	1
	TRINITY_DN101541_c4_g1_m.2910	216	K	TRINITY_DN101541_c4_g1|g.2910 ORF TRINITY_DN101541_c4_g1|g.2910 TRINITY_DN101541_c4_g1_m.2910 type:complete len:514 (+) TRINITY_DN101541_c4_g1:152-1693(+)	1	0.000826909	94.66	GQDLYTSK(1)TVR	2	-0.88333	1
	TRINITY_DN101626_c2_g6_m.3096	234	K	TRINITY_DN101626_c2_g6|g.3096 ORF TRINITY_DN101626_c2_g6|g.3096 TRINITY_DN101626_c2_g6_m.3096 type:complete len:542 (+) TRINITY_DN101626_c2_g6:471-2096(+)	1	4.81987e-16	139.7	EHVQLAK(1)TLGVSK	2	-2.992	1
	TRINITY_DN101629_c1_g2_m.3102	549	K	TRINITY_DN101629_c1_g2|g.3102 ORF TRINITY_DN101629_c1_g2|g.3102 TRINITY_DN101629_c1_g2_m.3102 type:complete len:698 (+) TRINITY_DN101629_c1_g2:82-2175(+)	1	4.2913e-08	82.437	NIFK(1)LAQGEYIAPEK	2	-0.67201	1
	TRINITY_DN101629_c1_g2_m.3102	372	K	TRINITY_DN101629_c1_g2|g.3102 ORF TRINITY_DN101629_c1_g2|g.3102 TRINITY_DN101629_c1_g2_m.3102 type:complete len:698 (+) TRINITY_DN101629_c1_g2:82-2175(+)	1	0.0654158	43.734	TSGGLK(1)ER	2	-0.84325	1
	TRINITY_DN101643_c4_g1_m.3120	177	K	TRINITY_DN101643_c4_g1|g.3120 ORF TRINITY_DN101643_c4_g1|g.3120 TRINITY_DN101643_c4_g1_m.3120 type:complete len:253 (+) TRINITY_DN101643_c4_g1:286-1044(+)	1	0.000325031	80.623	IDSTYSQGSPAK(1)IR	2	-4.2909	1
	TRINITY_DN101648_c0_g1_m.3129	46	K	TRINITY_DN101648_c0_g1|g.3129 ORF TRINITY_DN101648_c0_g1|g.3129 TRINITY_DN101648_c0_g1_m.3129 type:complete len:152 (+) TRINITY_DN101648_c0_g1:80-535(+)	1	4.31702e-06	115.79	YKPETCSIQSHK(1)GDR	3	-1.2604	2
	TRINITY_DN101648_c0_g1_m.3129	36	K	TRINITY_DN101648_c0_g1|g.3129 ORF TRINITY_DN101648_c0_g1|g.3129 TRINITY_DN101648_c0_g1_m.3129 type:complete len:152 (+) TRINITY_DN101648_c0_g1:80-535(+)	1	0.000118839	88.24	YK(1)PETCSIQSHK	3	1.4945	2
	TRINITY_DN101648_c0_g1_m.3129	80	K	TRINITY_DN101648_c0_g1|g.3129 ORF TRINITY_DN101648_c0_g1|g.3129 TRINITY_DN101648_c0_g1_m.3129 type:complete len:152 (+) TRINITY_DN101648_c0_g1:80-535(+)	1	1.41192e-13	159.44	GDPIEFELGK(1)GQVIK	2	1.2992	1
	TRINITY_DN101790_c1_g1_m.3376	566	K	TRINITY_DN101790_c1_g1|g.3376 ORF TRINITY_DN101790_c1_g1|g.3376 TRINITY_DN101790_c1_g1_m.3376 type:complete len:673 (+) TRINITY_DN101790_c1_g1:160-2178(+)	1	0.018512	49.325	EK(1)AEAAAR	2	-0.31824	1
	TRINITY_DN101790_c1_g1_m.3376	585	K	TRINITY_DN101790_c1_g1|g.3376 ORF TRINITY_DN101790_c1_g1|g.3376 TRINITY_DN101790_c1_g1_m.3376 type:complete len:673 (+) TRINITY_DN101790_c1_g1:160-2178(+)	1	0.00606496	68.49	AEALAK(1)EEEER	2	-1.7971	1
	TRINITY_DN101818_c1_g1_m.3435	218	K	TRINITY_DN101818_c1_g1|g.3435 ORF TRINITY_DN101818_c1_g1|g.3435 TRINITY_DN101818_c1_g1_m.3435 type:complete len:542 (+) TRINITY_DN101818_c1_g1:130-1755(+)	1	0.0670945	40.502	YIK(1)ILGEALK	2	0.16525	1
	TRINITY_DN101874_c4_g1_m.3521	409	K	TRINITY_DN101874_c4_g1|g.3521 ORF TRINITY_DN101874_c4_g1|g.3521 TRINITY_DN101874_c4_g1_m.3521 type:complete len:432 (+) TRINITY_DN101874_c4_g1:243-1538(+)	1	0.00210255	85.622	IVANHEAYQK(1)R	2	-1.7699	1
	TRINITY_DN101894_c0_g1_m.3564	347	K	TRINITY_DN101894_c0_g1|g.3564 ORF TRINITY_DN101894_c0_g1|g.3564 TRINITY_DN101894_c0_g1_m.3564 type:complete len:464 (+) TRINITY_DN101894_c0_g1:295-1686(+)	1	0.000381916	88.42	TDRPFK(1)TSIVFAHDR	3	-0.72887	1
	TRINITY_DN101986_c0_g1_m.3723	119	K	TRINITY_DN101986_c0_g1|g.3723 ORF TRINITY_DN101986_c0_g1|g.3723 TRINITY_DN101986_c0_g1_m.3723 type:complete len:268 (+) TRINITY_DN101986_c0_g1:81-884(+)	1	0.000335447	115.86	VPVAK(1)LDDK	2	0.40346	1
	TRINITY_DN101986_c0_g1_m.3723	88	K	TRINITY_DN101986_c0_g1|g.3723 ORF TRINITY_DN101986_c0_g1|g.3723 TRINITY_DN101986_c0_g1_m.3723 type:complete len:268 (+) TRINITY_DN101986_c0_g1:81-884(+)	1	2.16175e-08	104.04	VLLTLEEK(1)NLPYDIK	2	3.108	1
	TRINITY_DN101986_c0_g1_m.3723	108	K	TRINITY_DN101986_c0_g1|g.3723 ORF TRINITY_DN101986_c0_g1|g.3723 TRINITY_DN101986_c0_g1_m.3723 type:complete len:268 (+) TRINITY_DN101986_c0_g1:81-884(+)	0.999956	7.72464e-07	81.409	LANLANKPEWFLK(1)ISPEGK	3	-1.5235	1
	TRINITY_DN101986_c0_g1_m.3723	249	K	TRINITY_DN101986_c0_g1|g.3723 ORF TRINITY_DN101986_c0_g1|g.3723 TRINITY_DN101986_c0_g1_m.3723 type:complete len:268 (+) TRINITY_DN101986_c0_g1:81-884(+)	1	9.3589e-13	187.82	ESFVK(1)TQALR	2	-1.1686	1
	TRINITY_DN101995_c0_g1_m.3740	24	K	TRINITY_DN101995_c0_g1|g.3740 ORF TRINITY_DN101995_c0_g1|g.3740 TRINITY_DN101995_c0_g1_m.3740 type:complete len:456 (+) TRINITY_DN101995_c0_g1:461-1828(+)	1	0.0183069	48.785	DNK(1)DLVAANIR	2	-1.0683	1
	TRINITY_DN102004_c0_g1_m.3758	204	K	TRINITY_DN102004_c0_g1|g.3758 ORF TRINITY_DN102004_c0_g1|g.3758 TRINITY_DN102004_c0_g1_m.3758 type:complete len:550 (+) TRINITY_DN102004_c0_g1:40-1689(+)	1	0.0466728	43.306	NSDELIDFK(1)EGR	2	3.9739	1
	TRINITY_DN102004_c0_g1_m.3758	424	K	TRINITY_DN102004_c0_g1|g.3758 ORF TRINITY_DN102004_c0_g1|g.3758 TRINITY_DN102004_c0_g1_m.3758 type:complete len:550 (+) TRINITY_DN102004_c0_g1:40-1689(+)	1	0.00173624	47.561	VQEQNK(1)TALR	2	0.63266	1
	TRINITY_DN102012_c1_g1_m.3775	172	K	TRINITY_DN102012_c1_g1|g.3775 ORF TRINITY_DN102012_c1_g1|g.3775 TRINITY_DN102012_c1_g1_m.3775 type:complete len:444 (+) TRINITY_DN102012_c1_g1:235-1566(+)	1	5.73583e-07	131.54	VVQK(1)QFHDVGGK	2	-1.6296	2
	TRINITY_DN102012_c1_g1_m.3775	180	K	TRINITY_DN102012_c1_g1|g.3775 ORF TRINITY_DN102012_c1_g1|g.3775 TRINITY_DN102012_c1_g1_m.3775 type:complete len:444 (+) TRINITY_DN102012_c1_g1:235-1566(+)	1	4.23979e-11	131.54	QFHDVGGK(1)AVEVK	2	-1.1276	2
	TRINITY_DN102018_c0_g1_m.3783	682	K	TRINITY_DN102018_c0_g1|g.3783 ORF TRINITY_DN102018_c0_g1|g.3783 TRINITY_DN102018_c0_g1_m.3783 type:complete len:778 (+) TRINITY_DN102018_c0_g1:81-2414(+)	1	0.000882693	60.329	TLANPGDLNYPSFSVIFSSLHDVVTYK(1)R	3	4.2366	1
	TRINITY_DN102018_c0_g1_m.3783	205	K	TRINITY_DN102018_c0_g1|g.3783 ORF TRINITY_DN102018_c0_g1|g.3783 TRINITY_DN102018_c0_g1_m.3783 type:complete len:778 (+) TRINITY_DN102018_c0_g1:81-2414(+)	1	1.22514e-34	191.95	HPIDETLESK(1)SPLDTK	2	-3.0829	3
	TRINITY_DN102018_c0_g1_m.3783	758	K	TRINITY_DN102018_c0_g1|g.3783 ORF TRINITY_DN102018_c0_g1|g.3783 TRINITY_DN102018_c0_g1_m.3783 type:complete len:778 (+) TRINITY_DN102018_c0_g1:81-2414(+)	1	1.01809e-12	166.71	QFGWISWSDGVHK(1)VR	2	-1.0295	2
	TRINITY_DN102018_c0_g1_m.3783	188	K	TRINITY_DN102018_c0_g1|g.3783 ORF TRINITY_DN102018_c0_g1|g.3783 TRINITY_DN102018_c0_g1_m.3783 type:complete len:778 (+) TRINITY_DN102018_c0_g1:81-2414(+)	1	3.60122e-07	158.57	FYYK(1)GYEAYLR	2	-1.0778	1
	TRINITY_DN102018_c0_g1_m.3783	714	K	TRINITY_DN102018_c0_g1|g.3783 ORF TRINITY_DN102018_c0_g1|g.3783 TRINITY_DN102018_c0_g1_m.3783 type:complete len:778 (+) TRINITY_DN102018_c0_g1:81-2414(+)	1	0.000336111	69.224	VYNVEISSPPEVDVK(1)VTPSK	2	0.71659	1
	TRINITY_DN102018_c0_g1_m.3783	505	K	TRINITY_DN102018_c0_g1|g.3783 ORF TRINITY_DN102018_c0_g1|g.3783 TRINITY_DN102018_c0_g1_m.3783 type:complete len:778 (+) TRINITY_DN102018_c0_g1:81-2414(+)	1	0.00138214	40.324	TPEILK(1)PDVIAPGVNILAAWTR	3	3.4817	1
	TRINITY_DN102018_c0_g1_m.3783	184	K	TRINITY_DN102018_c0_g1|g.3783 ORF TRINITY_DN102018_c0_g1|g.3783 TRINITY_DN102018_c0_g1_m.3783 type:complete len:778 (+) TRINITY_DN102018_c0_g1:81-2414(+)	1	0.0207531	45.489	LVGAK(1)FYYK	2	-1.3624	1
	TRINITY_DN102018_c0_g1_m.3783	211	K	TRINITY_DN102018_c0_g1|g.3783 ORF TRINITY_DN102018_c0_g1|g.3783 TRINITY_DN102018_c0_g1_m.3783 type:complete len:778 (+) TRINITY_DN102018_c0_g1:81-2414(+)	1	7.07396e-14	77.932	SPLDTK(1)GHGTHTASTAAGAVVSGASFLGYAEGEAR	4	0.89908	2
	TRINITY_DN102019_c0_g1_m.3788	31	K	TRINITY_DN102019_c0_g1|g.3788 ORF TRINITY_DN102019_c0_g1|g.3788 TRINITY_DN102019_c0_g1_m.3788 type:complete len:219 (+) TRINITY_DN102019_c0_g1:600-1256(+)	1	0.00469691	88.24	NFSK(1)GLQEDER	2	1.1723	1
	TRINITY_DN102035_c0_g1_m.3833	209	K	TRINITY_DN102035_c0_g1|g.3833 ORF TRINITY_DN102035_c0_g1|g.3833 TRINITY_DN102035_c0_g1_m.3833 type:complete len:831 (+) TRINITY_DN102035_c0_g1:88-2580(+)	1	0.000577128	73.655	NPK(1)MLELASWLK	2	-0.85654	1
	TRINITY_DN102041_c0_g2_m.3846	67	K	TRINITY_DN102041_c0_g2|g.3846 ORF TRINITY_DN102041_c0_g2|g.3846 TRINITY_DN102041_c0_g2_m.3846 type:5prime_partial len:584 (+) TRINITY_DN102041_c0_g2:1-1752(+)	1	7.74431e-22	123.14	SSFK(1)IVDGPPSSAAGSPEEIAK	2	-3.1758	1
	TRINITY_DN102041_c0_g2_m.3846	63	K	TRINITY_DN102041_c0_g2|g.3846 ORF TRINITY_DN102041_c0_g2|g.3846 TRINITY_DN102041_c0_g2_m.3846 type:5prime_partial len:584 (+) TRINITY_DN102041_c0_g2:1-1752(+)	1	0.000109637	81.48	LNHPLPLPAVLK(1)SSFK	2	1.7143	2
	TRINITY_DN102041_c0_g2_m.3846	142	K	TRINITY_DN102041_c0_g2|g.3846 ORF TRINITY_DN102041_c0_g2|g.3846 TRINITY_DN102041_c0_g2_m.3846 type:5prime_partial len:584 (+) TRINITY_DN102041_c0_g2:1-1752(+)	1	0.00158074	83.623	AK(1)GSTLYGFR	2	-0.83158	1
	TRINITY_DN102041_c0_g2_m.3846	282	K	TRINITY_DN102041_c0_g2|g.3846 ORF TRINITY_DN102041_c0_g2|g.3846 TRINITY_DN102041_c0_g2_m.3846 type:5prime_partial len:584 (+) TRINITY_DN102041_c0_g2:1-1752(+)	1	0.000427271	98.009	STGK(1)YYHFVR	2	-1.3751	1
	TRINITY_DN102041_c0_g2_m.3846	424	K	TRINITY_DN102041_c0_g2|g.3846 ORF TRINITY_DN102041_c0_g2|g.3846 TRINITY_DN102041_c0_g2_m.3846 type:5prime_partial len:584 (+) TRINITY_DN102041_c0_g2:1-1752(+)	1	4.82026e-09	108.34	IETEK(1)MLISMVETELEK	2	3.7029	2
	TRINITY_DN102041_c0_g2_m.3846	249	K	TRINITY_DN102041_c0_g2|g.3846 ORF TRINITY_DN102041_c0_g2|g.3846 TRINITY_DN102041_c0_g2_m.3846 type:5prime_partial len:584 (+) TRINITY_DN102041_c0_g2:1-1752(+)	1	0.0503559	49.96	TIDGDLK(1)CK	2	-0.71824	1
	TRINITY_DN102041_c0_g2_m.3846	419	K	TRINITY_DN102041_c0_g2|g.3846 ORF TRINITY_DN102041_c0_g2|g.3846 TRINITY_DN102041_c0_g2_m.3846 type:5prime_partial len:584 (+) TRINITY_DN102041_c0_g2:1-1752(+)	1	7.55899e-13	172.09	DPHGNVQVAK(1)IETEK	2	-3.5043	2
	TRINITY_DN102041_c0_g2_m.3846	187	K	TRINITY_DN102041_c0_g2|g.3846 ORF TRINITY_DN102041_c0_g2|g.3846 TRINITY_DN102041_c0_g2_m.3846 type:5prime_partial len:584 (+) TRINITY_DN102041_c0_g2:1-1752(+)	1	0.0133575	72.042	DK(1)IETPEQFK	2	2.919	1
	TRINITY_DN102041_c0_g2_m.3846	195	K	TRINITY_DN102041_c0_g2|g.3846 ORF TRINITY_DN102041_c0_g2|g.3846 TRINITY_DN102041_c0_g2_m.3846 type:5prime_partial len:584 (+) TRINITY_DN102041_c0_g2:1-1752(+)	1	2.14145e-37	224.97	DKIETPEQFK(1)QAEETVLK	3	-2.2477	2
	TRINITY_DN102080_c1_g1_m.3928	124	K	TRINITY_DN102080_c1_g1|g.3928 ORF TRINITY_DN102080_c1_g1|g.3928 TRINITY_DN102080_c1_g1_m.3928 type:5prime_partial len:295 (+) TRINITY_DN102080_c1_g1:3-887(+)	1	4.18638e-05	81.799	SAHLK(1)ALEVAK	2	0.2599	2
	TRINITY_DN102080_c1_g1_m.3928	197	K	TRINITY_DN102080_c1_g1|g.3928 ORF TRINITY_DN102080_c1_g1|g.3928 TRINITY_DN102080_c1_g1_m.3928 type:5prime_partial len:295 (+) TRINITY_DN102080_c1_g1:3-887(+)	1	6.21943e-08	102.03	PSLK(1)LLLVTLGEK	2	0.15787	2
	TRINITY_DN102080_c1_g1_m.3928	274	K	TRINITY_DN102080_c1_g1|g.3928 ORF TRINITY_DN102080_c1_g1|g.3928 TRINITY_DN102080_c1_g1_m.3928 type:5prime_partial len:295 (+) TRINITY_DN102080_c1_g1:3-887(+)	1	6.25401e-23	163.59	FANACGAITTTK(1)K	2	-1.667	1
	TRINITY_DN102080_c1_g1_m.3928	104	K	TRINITY_DN102080_c1_g1|g.3928 ORF TRINITY_DN102080_c1_g1|g.3928 TRINITY_DN102080_c1_g1_m.3928 type:5prime_partial len:295 (+) TRINITY_DN102080_c1_g1:3-887(+)	1	8.3413e-07	104.49	AK(1)VFHYGSISLITEPCR	2	-2.0429	3
	TRINITY_DN102080_c1_g1_m.3928	213	K	TRINITY_DN102080_c1_g1|g.3928 ORF TRINITY_DN102080_c1_g1|g.3928 TRINITY_DN102080_c1_g1_m.3928 type:5prime_partial len:295 (+) TRINITY_DN102080_c1_g1:3-887(+)	1	0.0116757	78.178	YYTK(1)DFR	2	-0.7526	1
	TRINITY_DN102080_c1_g1_m.3928	209	K	TRINITY_DN102080_c1_g1|g.3928 ORF TRINITY_DN102080_c1_g1|g.3928 TRINITY_DN102080_c1_g1_m.3928 type:5prime_partial len:295 (+) TRINITY_DN102080_c1_g1:3-887(+)	1	0.0616222	41.025	GCK(1)YYTK	2	0.88601	1
	TRINITY_DN102080_c1_g1_m.3928	31	K	TRINITY_DN102080_c1_g1|g.3928 ORF TRINITY_DN102080_c1_g1|g.3928 TRINITY_DN102080_c1_g1_m.3928 type:5prime_partial len:295 (+) TRINITY_DN102080_c1_g1:3-887(+)	1	0.000664971	87.573	AAFMGK(1)LGDDEFGR	2	1.0373	2
	TRINITY_DN102080_c1_g1_m.3928	223	K	TRINITY_DN102080_c1_g1|g.3928 ORF TRINITY_DN102080_c1_g1|g.3928 TRINITY_DN102080_c1_g1_m.3928 type:5prime_partial len:295 (+) TRINITY_DN102080_c1_g1:3-887(+)	1	0.0502527	54.143	GAVDAFK(1)VSQIDTTGAGDAFVGALLTK	3	4.989	1
[truncated: 40,761 more rows]

## Sheet: Subcellular localization
Category	Protein accession	Position	Amino acid	Protein description	Localization probability	PEP	Score	Modified sequence	Charge	Mass error [ppm]	MS/MS Count
[truncated: 4,726 more rows]

[truncated: 1 more sheets: COG]
