# Supplementary material for: Qualitative Proteome-Wide Analysis Reveals the Diverse Functions of Lysine Crotonylation in Dendrobium huoshanense
Source: Front Plant Sci. 2022 Feb 16;13:822374. doi: 10.3389/fpls.2022.822374 (PMC8888884; doi:10.3389/fpls.2022.822374)
Supplement: Supplementary file 4 [file Table_3.XLSX]

## Sheet: GO enrichment
GO Terms Level 1	GO Terms Description	GO Terms Level	GO Terms ID	Mapping	Background	All Mapping	All Background	Fold Enrichment	Fisher' exact test P value	-log10(p value)	Related Protein
Molecular Function	copper ion binding	6	GO:0005507	49	94	753	8423	5.83	3.24159e-26	25.49	TRINITY_DN90546_c1_g1_m.23968 TRINITY_DN92894_c2_g1_m.26078 TRINITY_DN103801_c1_g1_m.7659 TRINITY_DN101725_c1_g1_m.3268 TRINITY_DN99603_c0_g2_m.35487 TRINITY_DN95475_c0_g1_m.29199 TRINITY_DN94862_c0_g1_m.28333 TRINITY_DN97087_c0_g1_m.31484 TRINITY_DN102910_c56_g26_m.5674 TRINITY_DN98000_c1_g1_m.32899 TRINITY_DN101641_c0_g1_m.3119 TRINITY_DN99755_c0_g1_m.35750 TRINITY_DN89667_c0_g1_m.23271 TRINITY…
	metal ion binding	4	GO:0046872	112	464	753	8423	2.7	3.5026e-20	19.46	TRINITY_DN88727_c0_g1_m.22702 TRINITY_DN100081_c0_g1_m.121 TRINITY_DN103071_c1_g6_m.6030 TRINITY_DN103801_c1_g1_m.7659 TRINITY_DN95475_c0_g1_m.29199 TRINITY_DN94862_c0_g1_m.28333 TRINITY_DN93332_c0_g1_m.26522 TRINITY_DN98000_c1_g1_m.32899 TRINITY_DN101641_c0_g1_m.3119 TRINITY_DN91578_c1_g1_m.24862 TRINITY_DN89667_c0_g1_m.23271 TRINITY_DN95396_c2_g1_m.29069 TRINITY_DN100408_c0_g1_m.709 TRINITY_DN9…
	cation binding	3	GO:0043169	115	485	753	8423	2.65	5.9878e-20	19.22	TRINITY_DN88727_c0_g1_m.22702 TRINITY_DN100081_c0_g1_m.121 TRINITY_DN103071_c1_g6_m.6030 TRINITY_DN103801_c1_g1_m.7659 TRINITY_DN95475_c0_g1_m.29199 TRINITY_DN94862_c0_g1_m.28333 TRINITY_DN93332_c0_g1_m.26522 TRINITY_DN98000_c1_g1_m.32899 TRINITY_DN101641_c0_g1_m.3119 TRINITY_DN91578_c1_g1_m.24862 TRINITY_DN89667_c0_g1_m.23271 TRINITY_DN95396_c2_g1_m.29069 TRINITY_DN100408_c0_g1_m.709 TRINITY_DN9…
	transition metal ion binding	5	GO:0046914	93	307	753	8423	3.39	4.69735e-13	12.33	TRINITY_DN88727_c0_g1_m.22702 TRINITY_DN100081_c0_g1_m.121 TRINITY_DN103071_c1_g6_m.6030 TRINITY_DN103801_c1_g1_m.7659 TRINITY_DN95475_c0_g1_m.29199 TRINITY_DN94862_c0_g1_m.28333 TRINITY_DN98000_c1_g1_m.32899 TRINITY_DN101641_c0_g1_m.3119 TRINITY_DN89667_c0_g1_m.23271 TRINITY_DN95396_c2_g1_m.29069 TRINITY_DN100408_c0_g1_m.709 TRINITY_DN95774_c0_g1_m.29589 TRINITY_DN96346_c5_g8_m.30421 TRINITY_DN9…
	oxidoreductase activity	2	GO:0016491	137	700	753	8423	2.19	2.13496e-12	11.67	TRINITY_DN96254_c0_g2_m.30286 TRINITY_DN77153_c0_g1_m.19086 TRINITY_DN100081_c0_g1_m.121 TRINITY_DN103010_c1_g1_m.5891 TRINITY_DN96496_c1_g2_m.30631 TRINITY_DN103239_c0_g1_m.6403 TRINITY_DN101354_c0_g2_m.2518 TRINITY_DN92956_c0_g1_m.26146 TRINITY_DN98228_c0_g1_m.33236 TRINITY_DN104656_c0_g7_m.9485 TRINITY_DN88487_c0_g1_m.22575 TRINITY_DN99283_c0_g1_m.34976 TRINITY_DN92383_c0_g1_m.25588 TRINITY_DN…
	ion binding	2	GO:0043167	165	949	753	8423	1.94	4.8096e-12	11.32	TRINITY_DN88727_c0_g1_m.22702 TRINITY_DN100081_c0_g1_m.121 TRINITY_DN86365_c0_g1_m.21537 TRINITY_DN10790_c0_g1_m.12825 TRINITY_DN95475_c0_g1_m.29199 TRINITY_DN98032_c0_g2_m.32943 TRINITY_DN94862_c0_g1_m.28333 TRINITY_DN93332_c0_g1_m.26522 TRINITY_DN98228_c0_g1_m.33236 TRINITY_DN91578_c1_g1_m.24862 TRINITY_DN89667_c0_g1_m.23271 TRINITY_DN95396_c2_g1_m.29069 TRINITY_DN76765_c0_g1_m.18999 TRINITY_DN…
	oxidoreductase activity, acting on NAD(P)H	3	GO:0016651	31	86	753	8423	4.03	1.92387e-11	10.72	TRINITY_DN91733_c0_g1_m.24987 TRINITY_DN77153_c0_g1_m.19086 TRINITY_DN89659_c0_g1_m.23268 TRINITY_DN103413_c0_g1_m.6788 TRINITY_DN99505_c0_g1_m.35334 TRINITY_DN94475_c0_g1_m.27888 TRINITY_DN101725_c1_g1_m.3268 TRINITY_DN99603_c0_g2_m.35487 TRINITY_DN97928_c0_g1_m.32775 TRINITY_DN98876_c1_g1_m.34294 TRINITY_DN87731_c1_g1_m.22167 TRINITY_DN98385_c0_g1_m.33538 TRINITY_DN98303_c3_g1_m.33397 TRINITY_D…
	cobalt ion binding	6	GO:0050897	18	38	753	8423	5.3	5.82375e-09	8.23	TRINITY_DN103857_c4_g1_m.7771 TRINITY_DN50714_c0_g3_m.16590 TRINITY_DN100081_c0_g1_m.121 TRINITY_DN94636_c0_g1_m.28074 TRINITY_DN99603_c0_g2_m.35487 TRINITY_DN100270_c1_g1_m.453 TRINITY_DN94862_c0_g1_m.28333 TRINITY_DN98358_c0_g1_m.33487 TRINITY_DN95363_c0_g1_m.29006 TRINITY_DN90760_c1_g1_m.24134 TRINITY_DN92242_c1_g1_m.25455 TRINITY_DN88424_c0_g1_m.22528 TRINITY_DN95774_c0_g1_m.29589 TRINITY_DN7…
Cellular Component	plastid	5	GO:0009536	428	1731	975	9859	2.5	1.5002e-49	48.82	TRINITY_DN93720_c1_g1_m.26996 TRINITY_DN97200_c0_g1_m.31660 TRINITY_DN96254_c0_g2_m.30286 TRINITY_DN77153_c0_g1_m.19086 TRINITY_DN96114_c0_g1_m.30054 TRINITY_DN96503_c0_g1_m.30642 TRINITY_DN83219_c0_g2_m.20398 TRINITY_DN103348_c8_g2_m.6625 TRINITY_DN92461_c0_g1_m.25670 TRINITY_DN89367_c0_g1_m.23087 TRINITY_DN95780_c0_g2_m.29596 TRINITY_DN94819_c0_g1_m.28287 TRINITY_DN99774_c0_g1_m.35783 TRINITY_D…
	chloroplast stroma	3	GO:0009570	198	591	975	9859	3.39	1.3852e-47	46.86	TRINITY_DN93720_c1_g1_m.26996 TRINITY_DN97200_c0_g1_m.31660 TRINITY_DN98803_c0_g1_m.34176 TRINITY_DN77153_c0_g1_m.19086 TRINITY_DN100960_c1_g4_m.1734 TRINITY_DN96114_c0_g1_m.30054 TRINITY_DN95878_c5_g2_m.29719 TRINITY_DN96503_c0_g1_m.30642 TRINITY_DN103348_c8_g2_m.6625 TRINITY_DN72971_c0_g1_m.18457 TRINITY_DN98032_c0_g2_m.32943 TRINITY_DN92461_c0_g1_m.25670 TRINITY_DN89367_c0_g1_m.23087 TRINITY_D…
	plastid stroma	2	GO:0009532	200	601	975	9859	3.36	1.7623e-47	46.75	TRINITY_DN93720_c1_g1_m.26996 TRINITY_DN97200_c0_g1_m.31660 TRINITY_DN98803_c0_g1_m.34176 TRINITY_DN77153_c0_g1_m.19086 TRINITY_DN100960_c1_g4_m.1734 TRINITY_DN96114_c0_g1_m.30054 TRINITY_DN95878_c5_g2_m.29719 TRINITY_DN96503_c0_g1_m.30642 TRINITY_DN103348_c8_g2_m.6625 TRINITY_DN72971_c0_g1_m.18457 TRINITY_DN98032_c0_g2_m.32943 TRINITY_DN92461_c0_g1_m.25670 TRINITY_DN89367_c0_g1_m.23087 TRINITY_D…
	apoplast	3	GO:0048046	87	180	975	9859	4.89	2.5526e-38	37.59	TRINITY_DN93720_c1_g1_m.26996 TRINITY_DN102018_c0_g1_m.3783 TRINITY_DN77153_c0_g1_m.19086 TRINITY_DN99566_c0_g1_m.35422 TRINITY_DN92120_c0_g1_m.25332 TRINITY_DN103801_c1_g1_m.7659 TRINITY_DN103154_c0_g1_m.6194 TRINITY_DN93867_c0_g1_m.27171 TRINITY_DN86269_c0_g1_m.21504 TRINITY_DN104085_c0_g2_m.8254 TRINITY_DN101641_c0_g1_m.3119 TRINITY_DN100617_c0_g1_m.1121 TRINITY_DN92256_c0_g1_m.25468 TRINITY_D…
	plastid envelope	4	GO:0009526	160	509	975	9859	3.18	3.6939e-36	35.43	TRINITY_DN97200_c0_g1_m.31660 TRINITY_DN77153_c0_g1_m.19086 TRINITY_DN96114_c0_g1_m.30054 TRINITY_DN98032_c0_g2_m.32943 TRINITY_DN104761_c0_g21_m.9710 TRINITY_DN89367_c0_g1_m.23087 TRINITY_DN99063_c1_g1_m.34602 TRINITY_DN92956_c0_g1_m.26146 TRINITY_DN99454_c0_g1_m.35255 TRINITY_DN89667_c0_g1_m.23271 TRINITY_DN105870_c1_g9_m.12181 TRINITY_DN101113_c0_g1_m.2042 TRINITY_DN87684_c0_g1_m.22148 TRINITY…
	organelle envelope	3	GO:0031967	218	910	975	9859	2.42	3.2136e-28	27.49	TRINITY_DN97200_c0_g1_m.31660 TRINITY_DN77153_c0_g1_m.19086 TRINITY_DN100081_c0_g1_m.121 TRINITY_DN96114_c0_g1_m.30054 TRINITY_DN95536_c0_g2_m.29271 TRINITY_DN98032_c0_g2_m.32943 TRINITY_DN94862_c0_g1_m.28333 TRINITY_DN104761_c0_g21_m.9710 TRINITY_DN96100_c4_g23_m.30033 TRINITY_DN90142_c0_g1_m.23637 TRINITY_DN89367_c0_g1_m.23087 TRINITY_DN99063_c1_g1_m.34602 TRINITY_DN93354_c0_g1_m.26546 TRINITY_…
	envelope	2	GO:0031975	218	911	975	9859	2.42	3.7304e-28	27.43	TRINITY_DN97200_c0_g1_m.31660 TRINITY_DN77153_c0_g1_m.19086 TRINITY_DN100081_c0_g1_m.121 TRINITY_DN96114_c0_g1_m.30054 TRINITY_DN95536_c0_g2_m.29271 TRINITY_DN98032_c0_g2_m.32943 TRINITY_DN94862_c0_g1_m.28333 TRINITY_DN104761_c0_g21_m.9710 TRINITY_DN96100_c4_g23_m.30033 TRINITY_DN90142_c0_g1_m.23637 TRINITY_DN89367_c0_g1_m.23087 TRINITY_DN99063_c1_g1_m.34602 TRINITY_DN93354_c0_g1_m.26546 TRINITY_…
	chloroplast thylakoid membrane	6	GO:0009535	86	239	975	9859	3.64	3.9026e-26	25.41	TRINITY_DN93720_c1_g1_m.26996 TRINITY_DN95820_c0_g1_m.29646 TRINITY_DN93026_c1_g1_m.26210 TRINITY_DN99808_c1_g1_m.35853 TRINITY_DN94238_c0_g1_m.27588 TRINITY_DN98032_c0_g2_m.32943 TRINITY_DN95618_c0_g1_m.29394 TRINITY_DN104761_c0_g21_m.9710 TRINITY_DN100526_c0_g1_m.927 TRINITY_DN101641_c0_g1_m.3119 TRINITY_DN92256_c0_g1_m.25468 TRINITY_DN96873_c0_g1_m.31179 TRINITY_DN87862_c0_g1_m.22242 TRINITY_D…
Biological Process	monocarboxylic acid metabolic process	6	GO:0032787	64	351	877	9649	2.01	8.1741e-08	7.09	TRINITY_DN96991_c0_g1_m.31332 TRINITY_DN92044_c0_g1_m.25258 TRINITY_DN96254_c0_g2_m.30286 TRINITY_DN103413_c0_g1_m.6788 TRINITY_DN101629_c1_g2_m.3102 TRINITY_DN94784_c0_g1_m.28244 TRINITY_DN103828_c6_g1_m.7709 TRINITY_DN97835_c0_g1_m.32618 TRINITY_DN103071_c1_g6_m.6030 TRINITY_DN103794_c1_g1_m.7639 TRINITY_DN104123_c1_g1_m.8333 TRINITY_DN99648_c0_g1_m.35579 TRINITY_DN96613_c0_g1_m.30808 TRINITY_D…
	starch metabolic process	6	GO:0005982	17	51	877	9649	3.67	6.33491e-06	5.2	TRINITY_DN99566_c0_g1_m.35422 TRINITY_DN95878_c5_g2_m.29719 TRINITY_DN103348_c8_g2_m.6625 TRINITY_DN79262_c0_g1_m.19430 TRINITY_DN95069_c0_g1_m.28582 TRINITY_DN96669_c1_g1_m.30885 TRINITY_DN94951_c0_g1_m.28431 TRINITY_DN102650_c0_g1_m.5147 TRINITY_DN99583_c0_g1_m.35454 TRINITY_DN103974_c0_g1_m.7997 TRINITY_DN102851_c1_g1_m.5549 TRINITY_DN95700_c2_g1_m.29500 TRINITY_DN100650_c4_g2_m.1181 TRINITY_D…
	nicotinamide nucleotide metabolic process	6	GO:0046496	22	91	877	9649	2.66	4.86884e-05	4.31	TRINITY_DN97208_c0_g2_m.31666 TRINITY_DN96051_c0_g1_m.29985 TRINITY_DN77153_c0_g1_m.19086 TRINITY_DN94784_c0_g1_m.28244 TRINITY_DN95379_c0_g1_m.29038 TRINITY_DN51048_c0_g1_m.16604 TRINITY_DN87118_c0_g1_m.21905 TRINITY_DN101011_c6_g1_m.1843 TRINITY_DN94453_c1_g2_m.27864 TRINITY_DN97689_c0_g1_m.32389 TRINITY_DN94632_c0_g1_m.28069 TRINITY_DN116059_c0_g1_m.13447 TRINITY_DN100752_c1_g1_m.1377 TRINITY_…
	nucleoside diphosphate phosphorylation	6	GO:0006165	14	45	877	9649	3.42	0.000121326	3.92	TRINITY_DN116059_c0_g1_m.13447 TRINITY_DN97208_c0_g2_m.31666 TRINITY_DN96051_c0_g1_m.29985 TRINITY_DN78658_c0_g1_m.19296 TRINITY_DN94784_c0_g1_m.28244 TRINITY_DN105784_c0_g1_m.12019 TRINITY_DN51048_c0_g1_m.16604 TRINITY_DN90641_c0_g1_m.24034 TRINITY_DN87118_c0_g1_m.21905 TRINITY_DN93515_c0_g1_m.26724 TRINITY_DN75629_c0_g1_m.18812 TRINITY_DN99063_c1_g1_m.34602 TRINITY_DN94453_c1_g2_m.27864 TRINITY…
	protein targeting to chloroplast	6	GO:0045036	11	29	877	9649	4.17	0.000145581	3.84	TRINITY_DN95507_c1_g1_m.29232 TRINITY_DN101639_c0_g1_m.3117 TRINITY_DN93722_c0_g1_m.26997 TRINITY_DN92499_c0_g1_m.25713 TRINITY_DN90634_c0_g1_m.24026 TRINITY_DN96353_c0_g1_m.30429 TRINITY_DN95979_c0_g1_m.29873 TRINITY_DN94272_c0_g1_m.27621 TRINITY_DN102470_c0_g3_m.4759 TRINITY_DN93346_c1_g1_m.26538 TRINITY_DN93487_c0_g1_m.26696
	pyruvate metabolic process	7	GO:0006090	18	71	877	9649	2.79	0.000154936	3.81	TRINITY_DN97208_c0_g2_m.31666 TRINITY_DN96051_c0_g1_m.29985 TRINITY_DN103413_c0_g1_m.6788 TRINITY_DN94784_c0_g1_m.28244 TRINITY_DN100270_c1_g1_m.453 TRINITY_DN51048_c0_g1_m.16604 TRINITY_DN87118_c0_g1_m.21905 TRINITY_DN94453_c1_g2_m.27864 TRINITY_DN94632_c0_g1_m.28069 TRINITY_DN116059_c0_g1_m.13447 TRINITY_DN94095_c0_g1_m.27422 TRINITY_DN105784_c0_g1_m.12019 TRINITY_DN95043_c2_g1_m.28543 TRINITY_…
	dicarboxylic acid metabolic process	6	GO:0043648	20	87	877	9649	2.53	0.000238389	3.62	TRINITY_DN97843_c0_g1_m.32632 TRINITY_DN96991_c0_g1_m.31332 TRINITY_DN98803_c0_g1_m.34176 TRINITY_DN77153_c0_g1_m.19086 TRINITY_DN99287_c1_g1_m.34983 TRINITY_DN88684_c0_g1_m.22672 TRINITY_DN100270_c1_g1_m.453 TRINITY_DN98358_c0_g1_m.33487 TRINITY_DN98000_c1_g1_m.32899 TRINITY_DN85377_c0_g1_m.21083 TRINITY_DN103270_c0_g1_m.6447 TRINITY_DN91672_c0_g2_m.24937 TRINITY_DN93605_c0_g1_m.26848 TRINITY_DN…
	protein localization to chloroplast	6	GO:0072598	11	31	877	9649	3.9	0.000272551	3.56	TRINITY_DN95507_c1_g1_m.29232 TRINITY_DN101639_c0_g1_m.3117 TRINITY_DN93722_c0_g1_m.26997 TRINITY_DN92499_c0_g1_m.25713 TRINITY_DN90634_c0_g1_m.24026 TRINITY_DN96353_c0_g1_m.30429 TRINITY_DN95979_c0_g1_m.29873 TRINITY_DN94272_c0_g1_m.27621 TRINITY_DN102470_c0_g3_m.4759 TRINITY_DN93346_c1_g1_m.26538 TRINITY_DN93487_c0_g1_m.26696
	nucleotide phosphorylation	6	GO:0046939	14	49	877	9649	3.14	0.000310101	3.51	TRINITY_DN116059_c0_g1_m.13447 TRINITY_DN97208_c0_g2_m.31666 TRINITY_DN96051_c0_g1_m.29985 TRINITY_DN78658_c0_g1_m.19296 TRINITY_DN94784_c0_g1_m.28244 TRINITY_DN105784_c0_g1_m.12019 TRINITY_DN51048_c0_g1_m.16604 TRINITY_DN90641_c0_g1_m.24034 TRINITY_DN87118_c0_g1_m.21905 TRINITY_DN93515_c0_g1_m.26724 TRINITY_DN75629_c0_g1_m.18812 TRINITY_DN99063_c1_g1_m.34602 TRINITY_DN94453_c1_g2_m.27864 TRINITY…
	photosystem II repair	6	GO:0010206	7	12	877	9649	6.42	0.000314936	3.5	TRINITY_DN97057_c0_g1_m.31419 TRINITY_DN94362_c0_g1_m.27735 TRINITY_DN96873_c0_g1_m.31179 TRINITY_DN93986_c0_g1_m.27300 TRINITY_DN91989_c0_g1_m.25210 TRINITY_DN80778_c0_g1_m.19768 TRINITY_DN95495_c2_g1_m.29219
	purine nucleoside monophosphate metabolic process	6	GO:0009126	26	136	877	9649	2.1	0.000475742	3.32	TRINITY_DN88811_c0_g1_m.22750 TRINITY_DN81663_c0_g1_m.19994 TRINITY_DN97208_c0_g2_m.31666 TRINITY_DN96051_c0_g1_m.29985 TRINITY_DN92007_c0_g1_m.25222 TRINITY_DN100081_c0_g1_m.121 TRINITY_DN94784_c0_g1_m.28244 TRINITY_DN51048_c0_g1_m.16604 TRINITY_DN95671_c6_g1_m.29458 TRINITY_DN83980_c0_g1_m.20661 TRINITY_DN87118_c0_g1_m.21905 TRINITY_DN105491_c1_g2_m.11433 TRINITY_DN93759_c0_g2_m.27046 TRINITY_D…
	monocarboxylic acid biosynthetic process	6	GO:0072330	32	185	877	9649	1.9	0.000576114	3.24	TRINITY_DN99600_c0_g1_m.35483 TRINITY_DN92044_c0_g1_m.25258 TRINITY_DN86703_c0_g1_m.21707 TRINITY_DN97208_c0_g2_m.31666 TRINITY_DN96051_c0_g1_m.29985 TRINITY_DN94784_c0_g1_m.28244 TRINITY_DN103828_c6_g1_m.7709 TRINITY_DN97835_c0_g1_m.32618 TRINITY_DN51048_c0_g1_m.16604 TRINITY_DN104123_c1_g1_m.8333 TRINITY_DN99648_c0_g1_m.35579 TRINITY_DN87118_c0_g1_m.21905 TRINITY_DN95482_c0_g1_m.29206 TRINITY_D…
	purine ribonucleotide metabolic process	6	GO:0009150	35	210	877	9649	1.83	0.000608309	3.22	TRINITY_DN88811_c0_g1_m.22750 TRINITY_DN81663_c0_g1_m.19994 TRINITY_DN92007_c0_g1_m.25222 TRINITY_DN100081_c0_g1_m.121 TRINITY_DN103413_c0_g1_m.6788 TRINITY_DN94784_c0_g1_m.28244 TRINITY_DN104123_c1_g1_m.8333 TRINITY_DN87118_c0_g1_m.21905 TRINITY_DN105491_c1_g2_m.11433 TRINITY_DN98000_c1_g1_m.32899 TRINITY_DN69965_c0_g1_m.18103 TRINITY_DN98228_c0_g1_m.33236 TRINITY_DN94632_c0_g1_m.28069 TRINITY_D…
	monocarboxylic acid catabolic process	6	GO:0072329	15	60	877	9649	2.75	0.000765519	3.12	TRINITY_DN91672_c0_g2_m.24937 TRINITY_DN97835_c0_g1_m.32618 TRINITY_DN96886_c1_g1_m.31194 TRINITY_DN97115_c1_g1_m.31530 TRINITY_DN101541_c4_g1_m.2910 TRINITY_DN102303_c4_g2_m.4372 TRINITY_DN91480_c0_g1_m.24763 TRINITY_DN98681_c0_g1_m.33978 TRINITY_DN102224_c0_g1_m.4214 TRINITY_DN98358_c0_g1_m.33487 TRINITY_DN95994_c0_g1_m.29899 TRINITY_DN102035_c0_g1_m.3833 TRINITY_DN91806_c0_g1_m.25040 TRINITY_D…

## Sheet: KEGG enrichment
KEGG pathway	Mapping	Background	All Mapping	All Background	Fold enrichment	Fisher's exact test p value	-log10(p value)	Related proteins
map00710 Carbon fixation in photosynthetic organisms	40	92	821	5515	2.92	1.20677e-10	9.92	TRINITY_DN87654_c0_g1_m.22133 TRINITY_DN77153_c0_g1_m.19086 TRINITY_DN95226_c0_g2_m.28807 TRINITY_DN96287_c0_g1_m.30344 TRINITY_DN86269_c0_g1_m.21504 TRINITY_DN98368_c0_g1_m.33510 TRINITY_DN102553_c0_g4_m.4950 TRINITY_DN99755_c0_g1_m.35750 TRINITY_DN96884_c0_g1_m.31191 TRINITY_DN116059_c0_g1_m.13447 TRINITY_DN91797_c0_g1_m.25035 TRINITY_DN88222_c0_g1_m.22415 TRINITY_DN99096_c0_g1_m.34648 TRINITY_…
map03050 Proteasome	30	57	821	5515	3.54	1.45428e-10	9.84	TRINITY_DN92741_c0_g1_m.25924 TRINITY_DN100201_c1_g1_m.332 TRINITY_DN95601_c0_g1_m.29369 TRINITY_DN102299_c3_g1_m.4368 TRINITY_DN99664_c2_g1_m.35601 TRINITY_DN100000_c0_g1_m.1 TRINITY_DN95827_c0_g1_m.29657 TRINITY_DN82781_c0_g1_m.20269 TRINITY_DN102600_c0_g1_m.5048 TRINITY_DN101077_c2_g1_m.1974 TRINITY_DN95525_c0_g1_m.29253 TRINITY_DN94819_c0_g1_m.28287 TRINITY_DN83861_c0_g1_m.20612 TRINITY_DN964…
map00030 Pentose phosphate pathway	29	66	821	5515	2.95	5.12271e-08	7.29	TRINITY_DN102041_c0_g2_m.3846 TRINITY_DN97208_c0_g2_m.31666 TRINITY_DN99566_c0_g1_m.35422 TRINITY_DN94784_c0_g1_m.28244 TRINITY_DN100882_c0_g1_m.1611 TRINITY_DN100516_c5_g1_m.907 TRINITY_DN99753_c1_g1_m.35746 TRINITY_DN95379_c0_g1_m.29038 TRINITY_DN51048_c0_g1_m.16604 TRINITY_DN90642_c0_g1_m.24036 TRINITY_DN94951_c0_g1_m.28431 TRINITY_DN87118_c0_g1_m.21905 TRINITY_DN96287_c0_g1_m.30344 TRINITY_DN…
map00195 Photosynthesis	31	74	821	5515	2.81	5.93609e-08	7.23	TRINITY_DN93720_c1_g1_m.26996 TRINITY_DN85679_c0_g1_m.21216 TRINITY_DN91989_c0_g1_m.25210 TRINITY_DN94338_c0_g1_m.27710 TRINITY_DN92894_c2_g1_m.26078 TRINITY_DN88673_c0_g1_m.22662 TRINITY_DN91722_c0_g1_m.24977 TRINITY_DN88750_c0_g1_m.22715 TRINITY_DN103181_c0_g1_m.6251 TRINITY_DN95671_c6_g1_m.29458 TRINITY_DN92497_c1_g1_m.25710 TRINITY_DN95780_c0_g2_m.29596 TRINITY_DN87936_c0_g1_m.22285 TRINITY_D…
map00010 Glycolysis / Gluconeogenesis	52	164	821	5515	2.13	6.9192e-08	7.16	TRINITY_DN87654_c0_g1_m.22133 TRINITY_DN99566_c0_g1_m.35422 TRINITY_DN94807_c0_g1_m.28268 TRINITY_DN92120_c0_g1_m.25332 TRINITY_DN103413_c0_g1_m.6788 TRINITY_DN95569_c0_g1_m.29322 TRINITY_DN94784_c0_g1_m.28244 TRINITY_DN96823_c0_g1_m.31121 TRINITY_DN99603_c0_g2_m.35487 TRINITY_DN94662_c0_g1_m.28114 TRINITY_DN90799_c0_g1_m.24169 TRINITY_DN87118_c0_g1_m.21905 TRINITY_DN96287_c0_g1_m.30344 TRINITY_D…
map00480 Glutathione metabolism	36	96	821	5515	2.52	1.14033e-07	6.94	TRINITY_DN95820_c0_g1_m.29646 TRINITY_DN94820_c0_g1_m.28290 TRINITY_DN93435_c0_g2_m.26640 TRINITY_DN101725_c1_g1_m.3268 TRINITY_DN97928_c0_g1_m.32775 TRINITY_DN97560_c0_g2_m.32208 TRINITY_DN92536_c0_g1_m.25743 TRINITY_DN87747_c0_g1_m.22183 TRINITY_DN91227_c0_g1_m.24517 TRINITY_DN95396_c2_g1_m.29069 TRINITY_DN92383_c0_g1_m.25588 TRINITY_DN52453_c0_g1_m.16720 TRINITY_DN95396_c0_g1_m.29065 TRINITY_D…
map00051 Fructose and mannose metabolism	27	67	821	5515	2.71	1.24906e-06	5.9	TRINITY_DN102041_c0_g2_m.3846 TRINITY_DN96051_c0_g1_m.29985 TRINITY_DN95272_c0_g1_m.28883 TRINITY_DN94784_c0_g1_m.28244 TRINITY_DN100882_c0_g1_m.1611 TRINITY_DN100516_c5_g1_m.907 TRINITY_DN99753_c1_g1_m.35746 TRINITY_DN96698_c6_g2_m.30924 TRINITY_DN51048_c0_g1_m.16604 TRINITY_DN87118_c0_g1_m.21905 TRINITY_DN96287_c0_g1_m.30344 TRINITY_DN80410_c0_g1_m.19696 TRINITY_DN102553_c0_g4_m.4950 TRINITY_DN…
map00630 Glyoxylate and dicarboxylate metabolism	37	110	821	5515	2.26	1.58606e-06	5.8	TRINITY_DN97235_c0_g2_m.31711 TRINITY_DN88727_c0_g1_m.22702 TRINITY_DN100046_c0_g1_m.79 TRINITY_DN103413_c0_g1_m.6788 TRINITY_DN96496_c1_g2_m.30631 TRINITY_DN99603_c0_g2_m.35487 TRINITY_DN102910_c56_g26_m.5674 TRINITY_DN68564_c0_g1_m.17886 TRINITY_DN99755_c0_g1_m.35750 TRINITY_DN103270_c0_g1_m.6447 TRINITY_DN96142_c2_g1_m.30101 TRINITY_DN88222_c0_g1_m.22415 TRINITY_DN96724_c0_g1_m.30959 TRINITY_D…
map00020 Citrate cycle (TCA cycle)	30	82	821	5515	2.46	2.87805e-06	5.54	TRINITY_DN88811_c0_g1_m.22750 TRINITY_DN89516_c1_g1_m.23179 TRINITY_DN88727_c0_g1_m.22702 TRINITY_DN100081_c0_g1_m.121 TRINITY_DN103413_c0_g1_m.6788 TRINITY_DN95569_c0_g1_m.29322 TRINITY_DN93237_c0_g1_m.26408 TRINITY_DN100713_c0_g1_m.1307 TRINITY_DN101541_c4_g1_m.2910 TRINITY_DN99603_c0_g2_m.35487 TRINITY_DN87689_c0_g1_m.22149 TRINITY_DN98876_c1_g1_m.34294 TRINITY_DN103771_c0_g1_m.7588 TRINITY_DN…
map00620 Pyruvate metabolism	39	130	821	5515	2.02	1.68041e-05	4.77	TRINITY_DN77153_c0_g1_m.19086 TRINITY_DN103413_c0_g1_m.6788 TRINITY_DN95569_c0_g1_m.29322 TRINITY_DN103071_c1_g6_m.6030 TRINITY_DN96823_c0_g1_m.31121 TRINITY_DN99603_c0_g2_m.35487 TRINITY_DN94662_c0_g1_m.28114 TRINITY_DN86269_c0_g1_m.21504 TRINITY_DN99755_c0_g1_m.35750 TRINITY_DN91110_c1_g1_m.24430 TRINITY_DN88222_c0_g1_m.22415 TRINITY_DN89953_c0_g1_m.23466 TRINITY_DN97249_c2_g1_m.31737 TRINITY_D…
map00190 Oxidative phosphorylation	47	169	821	5515	1.87	1.77062e-05	4.75	TRINITY_DN88811_c0_g1_m.22750 TRINITY_DN81995_c0_g1_m.20084 TRINITY_DN93461_c1_g1_m.26665 TRINITY_DN89983_c0_g4_m.23490 TRINITY_DN81663_c0_g1_m.19994 TRINITY_DN92007_c0_g1_m.25222 TRINITY_DN100081_c0_g1_m.121 TRINITY_DN99505_c0_g1_m.35334 TRINITY_DN63600_c0_g1_m.17517 TRINITY_DN73687_c0_g1_m.18572 TRINITY_DN105491_c1_g2_m.11433 TRINITY_DN90142_c0_g1_m.23637 TRINITY_DN69965_c0_g1_m.18103 TRINITY_D…
map04141 Protein processing in endoplasmic reticulum	68	298	821	5515	1.53	0.000205588	3.69	TRINITY_DN101075_c0_g1_m.1969 TRINITY_DN96131_c0_g1_m.30083 TRINITY_DN103452_c0_g1_m.6866 TRINITY_DN103307_c0_g15_m.6526 TRINITY_DN87114_c0_g1_m.21904 TRINITY_DN10790_c0_g1_m.12825 TRINITY_DN72971_c0_g1_m.18457 TRINITY_DN99674_c1_g3_m.35628 TRINITY_DN99793_c2_g1_m.35818 TRINITY_DN103814_c0_g1_m.7682 TRINITY_DN96100_c4_g23_m.30033 TRINITY_DN100617_c0_g1_m.1121 TRINITY_DN104983_c2_g2_m.10276 TRINIT…
map00592 alpha-Linolenic acid metabolism	21	63	821	5515	2.24	0.000523786	3.28	TRINITY_DN103828_c6_g1_m.7709 TRINITY_DN97835_c0_g1_m.32618 TRINITY_DN96886_c1_g1_m.31194 TRINITY_DN104761_c0_g21_m.9710 TRINITY_DN94807_c0_g2_m.28273 TRINITY_DN103239_c0_g1_m.6403 TRINITY_DN104761_c0_g11_m.9704 TRINITY_DN98412_c0_g1_m.33585 TRINITY_DN102467_c0_g1_m.4743 TRINITY_DN96225_c0_g2_m.30239 TRINITY_DN104761_c0_g19_m.9708 TRINITY_DN104929_c0_g1_m.10154 TRINITY_DN104800_c1_g4_m.9810 TRINI…
map00071 Fatty acid degradation	20	59	821	5515	2.28	0.000587759	3.23	TRINITY_DN94389_c1_g1_m.27790 TRINITY_DN94807_c0_g1_m.28268 TRINITY_DN101629_c1_g2_m.3102 TRINITY_DN97835_c0_g1_m.32618 TRINITY_DN96886_c1_g1_m.31194 TRINITY_DN96823_c0_g1_m.31121 TRINITY_DN102303_c4_g2_m.4372 TRINITY_DN94662_c0_g1_m.28114 TRINITY_DN93615_c0_g10_m.26862 TRINITY_DN94807_c0_g2_m.28273 TRINITY_DN91806_c0_g1_m.25040 TRINITY_DN98412_c0_g1_m.33585 TRINITY_DN96225_c0_g2_m.30239 TRINITY_…
map00250 Alanine, aspartate and glutamate metabolism	20	63	821	5515	2.13	0.00143569	2.84	TRINITY_DN88736_c0_g1_m.22706 TRINITY_DN103857_c4_g1_m.7771 TRINITY_DN97843_c0_g1_m.32632 TRINITY_DN102910_c56_g26_m.5674 TRINITY_DN95962_c0_g1_m.29847 TRINITY_DN98358_c0_g1_m.33487 TRINITY_DN92461_c0_g1_m.25670 TRINITY_DN98368_c0_g1_m.33510 TRINITY_DN93401_c0_g1_m.26593 TRINITY_DN85969_c0_g1_m.21341 TRINITY_DN91672_c0_g2_m.24937 TRINITY_DN93605_c0_g1_m.26848 TRINITY_DN96519_c0_g1_m.30665 TRINITY…
map00061 Fatty acid biosynthesis	14	43	821	5515	2.19	0.00765281	2.12	TRINITY_DN99722_c6_g1_m.35700 TRINITY_DN91110_c1_g1_m.24430 TRINITY_DN56672_c0_g1_m.16982 TRINITY_DN95897_c0_g1_m.29749 TRINITY_DN86703_c0_g1_m.21707 TRINITY_DN94389_c1_g1_m.27790 TRINITY_DN86110_c0_g1_m.21402 TRINITY_DN42304_c0_g1_m.16189 TRINITY_DN90172_c0_g2_m.23664 TRINITY_DN101629_c1_g2_m.3102 TRINITY_DN91852_c0_g1_m.25081 TRINITY_DN97249_c2_g1_m.31737 TRINITY_DN103031_c1_g1_m.5935 TRINITY_D…
map00053 Ascorbate and aldarate metabolism	16	55	821	5515	1.95	0.0120646	1.92	TRINITY_DN100126_c0_g1_m.201 TRINITY_DN95820_c0_g1_m.29646 TRINITY_DN91569_c0_g1_m.24849 TRINITY_DN94820_c0_g1_m.28290 TRINITY_DN101986_c0_g1_m.3723 TRINITY_DN96852_c0_g1_m.31155 TRINITY_DN96823_c0_g1_m.31121 TRINITY_DN97560_c0_g2_m.32208 TRINITY_DN94662_c0_g1_m.28114 TRINITY_DN87731_c1_g1_m.22167 TRINITY_DN87747_c0_g1_m.22183 TRINITY_DN99066_c0_g1_m.34606 TRINITY_DN91227_c0_g1_m.24517 TRINITY_DN…
map00400 Phenylalanine, tyrosine and tryptophan biosynthesis	13	41	821	5515	2.13	0.0133999	1.87	TRINITY_DN97843_c0_g1_m.32632 TRINITY_DN96991_c0_g1_m.31332 TRINITY_DN95642_c0_g1_m.29422 TRINITY_DN93605_c0_g1_m.26848 TRINITY_DN103095_c2_g16_m.6072 TRINITY_DN99287_c1_g1_m.34983 TRINITY_DN99009_c0_g1_m.34525 TRINITY_DN101894_c0_g1_m.3564 TRINITY_DN98401_c1_g1_m.33568 TRINITY_DN101450_c0_g1_m.2721 TRINITY_DN80014_c0_g1_m.19585 TRINITY_DN85377_c0_g1_m.21083 TRINITY_DN101261_c2_g1_m.2346
map00500 Starch and sucrose metabolism	32	141	821	5515	1.52	0.0141034	1.85	TRINITY_DN99566_c0_g1_m.35422 TRINITY_DN95878_c5_g2_m.29719 TRINITY_DN79262_c0_g1_m.19430 TRINITY_DN103348_c8_g2_m.6625 TRINITY_DN97032_c0_g1_m.31382 TRINITY_DN99942_c1_g2_m.36084 TRINITY_DN98485_c0_g1_m.33683 TRINITY_DN96832_c0_g2_m.31128 TRINITY_DN93236_c1_g1_m.26407 TRINITY_DN98485_c0_g1_m.33682 TRINITY_DN103712_c0_g2_m.7439 TRINITY_DN95700_c2_g1_m.29500 TRINITY_DN100650_c4_g2_m.1181 TRINITY_D…
map00640 Propanoate metabolism	17	61	821	5515	1.87	0.0142331	1.85	TRINITY_DN95586_c2_g1_m.29351 TRINITY_DN86703_c0_g1_m.21707 TRINITY_DN99003_c1_g1_m.34518 TRINITY_DN103413_c0_g1_m.6788 TRINITY_DN97835_c0_g1_m.32618 TRINITY_DN99603_c0_g2_m.35487 TRINITY_DN102303_c4_g2_m.4372 TRINITY_DN96453_c1_g1_m.30570 TRINITY_DN98000_c1_g1_m.32899 TRINITY_DN91110_c1_g1_m.24430 TRINITY_DN95897_c0_g1_m.29749 TRINITY_DN96241_c1_g1_m.30260 TRINITY_DN81280_c0_g1_m.19898 TRINITY_D…
map00650 Butanoate metabolism	9	24	821	5515	2.52	0.0186726	1.73	TRINITY_DN88736_c0_g1_m.22706 TRINITY_DN96519_c0_g1_m.30665 TRINITY_DN91672_c0_g2_m.24937 TRINITY_DN81280_c0_g1_m.19898 TRINITY_DN96496_c1_g2_m.30631 TRINITY_DN90251_c0_g1_m.23745 TRINITY_DN102303_c4_g2_m.4372 TRINITY_DN98358_c0_g1_m.33487 TRINITY_DN103866_c0_g1_m.7782
map00260 Glycine, serine and threonine metabolism	19	74	821	5515	1.72	0.0209738	1.68	TRINITY_DN100046_c0_g1_m.79 TRINITY_DN92120_c0_g1_m.25332 TRINITY_DN103413_c0_g1_m.6788 TRINITY_DN94636_c0_g1_m.28074 TRINITY_DN96823_c0_g1_m.31121 TRINITY_DN99603_c0_g2_m.35487 TRINITY_DN97745_c0_g1_m.32480 TRINITY_DN95962_c0_g1_m.29847 TRINITY_DN68564_c0_g1_m.17886 TRINITY_DN103194_c1_g1_m.6280 TRINITY_DN88061_c0_g1_m.22326 TRINITY_DN97668_c1_g1_m.32359 TRINITY_DN94577_c0_g1_m.27995 TRINITY_DN8…
map00220 Arginine biosynthesis	13	46	821	5515	1.9	0.0327457	1.48	TRINITY_DN103857_c4_g1_m.7771 TRINITY_DN97843_c0_g1_m.32632 TRINITY_DN95157_c0_g1_m.28698 TRINITY_DN93605_c0_g1_m.26848 TRINITY_DN95481_c0_g1_m.29205 TRINITY_DN91264_c0_g1_m.24566 TRINITY_DN106508_c0_g1_m.12680 TRINITY_DN96319_c0_g1_m.30377 TRINITY_DN102910_c56_g26_m.5674 TRINITY_DN95962_c0_g1_m.29847 TRINITY_DN92461_c0_g1_m.25670 TRINITY_DN98368_c0_g1_m.33510 TRINITY_DN101261_c2_g1_m.2346
map00196 Photosynthesis - antenna proteins	10	32	821	5515	2.1	0.0388508	1.41	TRINITY_DN86340_c0_g1_m.21519 TRINITY_DN94238_c0_g1_m.27588 TRINITY_DN95886_c0_g1_m.29729 TRINITY_DN75655_c0_g1_m.18814 TRINITY_DN98032_c0_g2_m.32943 TRINITY_DN100181_c0_g1_m.296 TRINITY_DN101893_c3_g2_m.3561 TRINITY_DN91098_c0_g1_m.24420 TRINITY_DN92685_c0_g1_m.25868 TRINITY_DN92812_c0_g2_m.25989

## Sheet: Protein Domain
Domain Description	Mapping	Background	All Mapping	All Backgroud	Fold enrichment	Fisher's exact test p value	-log10(P value)	Related Protein
Proteasome subunit	14	23	949	8411	5.39	1.69543e-07	6.77	TRINITY_DN99664_c2_g1_m.35601 TRINITY_DN96498_c0_g1_m.30632 TRINITY_DN95827_c0_g1_m.29657 TRINITY_DN92099_c0_g1_m.25317 TRINITY_DN91703_c1_g1_m.24965 TRINITY_DN89446_c1_g1_m.23138 TRINITY_DN95347_c0_g1_m.28988 TRINITY_DN90721_c0_g1_m.24107 TRINITY_DN88612_c0_g1_m.22631 TRINITY_DN83486_c0_g1_m.20488 TRINITY_DN94819_c0_g1_m.28287 TRINITY_DN92404_c0_g2_m.25610 TRINITY_DN83861_c0_g1_m.20612 TRINITY_D…
Alcohol dehydrogenase GroES-like domain	17	34	949	8411	4.43	1.84193e-07	6.73	TRINITY_DN97347_c0_g1_m.31886 TRINITY_DN74386_c0_g1_m.18654 TRINITY_DN101271_c0_g2_m.2366 TRINITY_DN94807_c0_g1_m.28268 TRINITY_DN98385_c0_g1_m.33538 TRINITY_DN99214_c1_g1_m.34851 TRINITY_DN94807_c0_g2_m.28273 TRINITY_DN104761_c0_g11_m.9704 TRINITY_DN99827_c1_g2_m.35883 TRINITY_DN102467_c0_g1_m.4743 TRINITY_DN96225_c0_g2_m.30239 TRINITY_DN98215_c3_g2_m.33208 TRINITY_DN86499_c1_g2_m.21614 TRINITY_…
Thioredoxin	20	48	949	8411	3.69	3.84112e-07	6.42	TRINITY_DN93560_c0_g1_m.26791 TRINITY_DN75805_c0_g2_m.18833 TRINITY_DN94046_c0_g1_m.27370 TRINITY_DN99970_c0_g3_m.36146 TRINITY_DN94475_c0_g1_m.27888 TRINITY_DN98702_c0_g1_m.34011 TRINITY_DN97572_c0_g1_m.32224 TRINITY_DN84161_c0_g1_m.20721 TRINITY_DN73358_c0_g1_m.18515 TRINITY_DN82214_c0_g1_m.20144 TRINITY_DN95079_c0_g1_m.28595 TRINITY_DN87101_c0_g1_m.21894 TRINITY_DN91809_c0_g1_m.25046 TRINITY_D…
Clp protease	8	10	949	8411	7.09	1.99635e-05	4.7	TRINITY_DN80915_c0_g1_m.19802 TRINITY_DN93189_c1_g1_m.26362 TRINITY_DN95152_c1_g1_m.28693 TRINITY_DN93026_c1_g1_m.26210 TRINITY_DN100156_c5_g1_m.262 TRINITY_DN100110_c0_g2_m.171 TRINITY_DN91142_c0_g1_m.24452 TRINITY_DN98519_c0_g2_m.33723
Glutathione S-transferase, C-terminal domain	13	32	949	8411	3.6	0.00010314	3.99	TRINITY_DN93402_c0_g1_m.26596 TRINITY_DN77008_c0_g1_m.19048 TRINITY_DN102902_c1_g3_m.5661 TRINITY_DN18481_c0_g2_m.15329 TRINITY_DN91569_c0_g1_m.24849 TRINITY_DN93435_c0_g2_m.26640 TRINITY_DN95475_c0_g1_m.29199 TRINITY_DN100431_c0_g1_m.747 TRINITY_DN95358_c0_g1_m.29001 TRINITY_DN77903_c0_g2_m.19165 TRINITY_DN100197_c1_g2_m.321 TRINITY_DN60704_c0_g1_m.17243 TRINITY_DN91181_c0_g1_m.24482
Proteasome subunit A N-terminal signature	7	9	949	8411	6.89	0.000125499	3.9	TRINITY_DN88612_c0_g1_m.22631 TRINITY_DN96498_c0_g1_m.30632 TRINITY_DN95827_c0_g1_m.29657 TRINITY_DN83486_c0_g1_m.20488 TRINITY_DN94819_c0_g1_m.28287 TRINITY_DN92099_c0_g1_m.25317 TRINITY_DN91703_c1_g1_m.24965
Glutathione S-transferase, N-terminal domain	14	42	949	8411	2.95	0.000487001	3.31	TRINITY_DN93402_c0_g1_m.26596 TRINITY_DN92536_c1_g1_m.25744 TRINITY_DN77008_c0_g1_m.19048 TRINITY_DN102902_c1_g3_m.5661 TRINITY_DN91569_c0_g1_m.24849 TRINITY_DN101986_c0_g1_m.3723 TRINITY_DN93435_c0_g2_m.26640 TRINITY_DN52453_c0_g1_m.16720 TRINITY_DN95475_c0_g1_m.29199 TRINITY_DN100431_c0_g1_m.747 TRINITY_DN95358_c0_g1_m.29001 TRINITY_DN77903_c0_g2_m.19165 TRINITY_DN91181_c0_g1_m.24482 TRINITY_DN…
Aminotransferase class I and II	10	23	949	8411	3.85	0.000531637	3.27	TRINITY_DN97843_c0_g1_m.32632 TRINITY_DN93605_c0_g1_m.26848 TRINITY_DN93311_c0_g1_m.26500 TRINITY_DN91514_c0_g1_m.24796 TRINITY_DN99426_c0_g1_m.35224 TRINITY_DN96746_c0_g1_m.31010 TRINITY_DN95962_c0_g1_m.29847 TRINITY_DN98401_c1_g1_m.33568 TRINITY_DN101261_c2_g1_m.2346 TRINITY_DN98368_c0_g1_m.33510
Core histone H2A/H2B/H3/H4	14	43	949	8411	2.89	0.000627157	3.2	TRINITY_DN83851_c0_g1_m.20609 TRINITY_DN94972_c1_g2_m.28453 TRINITY_DN91078_c0_g1_m.24395 TRINITY_DN97250_c0_g1_m.31741 TRINITY_DN4821_c0_g2_m.16446 TRINITY_DN87019_c0_g1_m.21856 TRINITY_DN94818_c0_g8_m.28285 TRINITY_DN91443_c0_g2_m.24728 TRINITY_DN96239_c1_g1_m.30258 TRINITY_DN91467_c1_g1_m.24747 TRINITY_DN59128_c0_g1_m.17126 TRINITY_DN91677_c1_g1_m.24945 TRINITY_DN84206_c0_g1_m.20724 TRINITY_DN…
14-3-3 protein	9	21	949	8411	3.8	0.00133852	2.87	TRINITY_DN87616_c0_g2_m.22103 TRINITY_DN88475_c0_g1_m.22566 TRINITY_DN93312_c0_g1_m.26501 TRINITY_DN90121_c0_g1_m.23620 TRINITY_DN68431_c0_g1_m.17871 TRINITY_DN69851_c0_g3_m.18089 TRINITY_DN100585_c1_g1_m.1061 TRINITY_DN87616_c0_g1_m.22101 TRINITY_DN100885_c2_g3_m.1615
Phosphofructokinase	6	9	949	8411	5.91	0.00153595	2.81	TRINITY_DN102041_c0_g2_m.3846 TRINITY_DN90641_c0_g1_m.24034 TRINITY_DN87118_c0_g1_m.21905 TRINITY_DN94784_c0_g1_m.28244 TRINITY_DN80410_c0_g1_m.19696 TRINITY_DN100882_c0_g1_m.1611
KH domain	12	37	949	8411	2.87	0.00188746	2.72	TRINITY_DN91704_c0_g1_m.24967 TRINITY_DN102240_c0_g1_m.4244 TRINITY_DN105985_c12_g6_m.12448 TRINITY_DN88766_c0_g1_m.22721 TRINITY_DN97289_c0_g1_m.31796 TRINITY_DN92033_c0_g1_m.25241 TRINITY_DN105712_c0_g3_m.11855 TRINITY_DN100208_c0_g1_m.344 TRINITY_DN101103_c1_g2_m.2021 TRINITY_DN92571_c1_g1_m.25778 TRINITY_DN92372_c0_g1_m.25575 TRINITY_DN105911_c8_g2_m.12314
Elongation factor Tu domain 2	9	22	949	8411	3.63	0.00189814	2.72	TRINITY_DN99785_c0_g2_m.35803 TRINITY_DN98164_c0_g1_m.33135 TRINITY_DN102398_c1_g1_m.4587 TRINITY_DN99844_c0_g1_m.35916 TRINITY_DN98912_c0_g1_m.34347 TRINITY_DN101626_c2_g6_m.3096 TRINITY_DN100689_c3_g3_m.1267 TRINITY_DN100340_c1_g1_m.591 TRINITY_DN104961_c1_g2_m.10230
Peroxidase	10	27	949	8411	3.28	0.00201163	2.7	TRINITY_DN94101_c0_g1_m.27429 TRINITY_DN96293_c0_g1_m.30347 TRINITY_DN95820_c0_g1_m.29646 TRINITY_DN96615_c1_g1_m.30811 TRINITY_DN94820_c0_g1_m.28290 TRINITY_DN97560_c0_g2_m.32208 TRINITY_DN99012_c0_g1_m.34527 TRINITY_DN87747_c0_g1_m.22183 TRINITY_DN99066_c0_g1_m.34606 TRINITY_DN91227_c0_g1_m.24517
FKBP-type peptidyl-prolyl cis-trans isomerase	8	19	949	8411	3.73	0.00335361	2.47	TRINITY_DN76932_c0_g1_m.19034 TRINITY_DN86809_c0_g1_m.21753 TRINITY_DN101648_c0_g1_m.3129 TRINITY_DN95649_c5_g5_m.29433 TRINITY_DN101643_c4_g1_m.3120 TRINITY_DN105113_c0_g1_m.10566 TRINITY_DN95369_c0_g1_m.29026 TRINITY_DN87062_c0_g1_m.21880
Pyridine nucleotide-disulphide oxidoreductase	10	30	949	8411	2.95	0.00450262	2.35	TRINITY_DN94632_c0_g1_m.28069 TRINITY_DN102807_c3_g4_m.5462 TRINITY_DN103413_c0_g1_m.6788 TRINITY_DN101725_c1_g1_m.3268 TRINITY_DN94475_c0_g1_m.27888 TRINITY_DN99603_c0_g2_m.35487 TRINITY_DN97928_c0_g1_m.32775 TRINITY_DN87731_c1_g1_m.22167 TRINITY_DN103119_c2_g2_m.6120 TRINITY_DN84369_c0_g1_m.20773
ATP synthase alpha/beta family, beta-barrel domain	6	12	949	8411	4.43	0.00722527	2.14	TRINITY_DN89667_c0_g1_m.23271 TRINITY_DN95671_c6_g1_m.29456 TRINITY_DN96106_c0_g1_m.30040 TRINITY_DN88673_c0_g1_m.22662 TRINITY_DN86416_c0_g1_m.21571 TRINITY_DN63600_c0_g1_m.17517
Papain family cysteine protease	6	12	949	8411	4.43	0.00722527	2.14	TRINITY_DN93867_c0_g1_m.27171 TRINITY_DN100123_c0_g1_m.199 TRINITY_DN95446_c0_g1_m.29156 TRINITY_DN75765_c0_g1_m.18827 TRINITY_DN102593_c2_g1_m.5034 TRINITY_DN92421_c0_g1_m.25631
Oxidoreductase NAD-binding domain	6	12	949	8411	4.43	0.00722527	2.14	TRINITY_DN94368_c1_g1_m.27746 TRINITY_DN92256_c0_g1_m.25468 TRINITY_DN98108_c0_g1_m.33064 TRINITY_DN98303_c3_g1_m.33397 TRINITY_DN92894_c2_g1_m.26078 TRINITY_DN89077_c0_g1_m.22903
Pathogenesis-related protein Bet v I family	5	8	949	8411	5.54	0.00772744	2.11	TRINITY_DN98314_c0_g4_m.33422 TRINITY_DN56510_c0_g1_m.16971 TRINITY_DN849_c0_g1_m.20945 TRINITY_DN98314_c0_g2_m.33420 TRINITY_DN90416_c1_g1_m.23871
UBA/TS-N domain	7	17	949	8411	3.65	0.00834533	2.08	TRINITY_DN104081_c0_g1_m.8244 TRINITY_DN104465_c3_g2_m.9064 TRINITY_DN94593_c2_g2_m.28017 TRINITY_DN100699_c0_g1_m.1283 TRINITY_DN100032_c1_g3_m.64 TRINITY_DN103943_c2_g2_m.7944 TRINITY_DN99359_c1_g2_m.35121
Lipocalin-like domain	4	5	949	8411	7.09	0.0119788	1.92	TRINITY_DN97804_c0_g7_m.32570 TRINITY_DN89576_c0_g1_m.23205 TRINITY_DN97804_c0_g11_m.32567 TRINITY_DN97804_c0_g9_m.32572
Thioredoxin-like domain	4	5	949	8411	7.09	0.0119788	1.92	TRINITY_DN103258_c0_g1_m.6432 TRINITY_DN94046_c0_g1_m.27370 TRINITY_DN99970_c0_g3_m.36146 TRINITY_DN98702_c0_g1_m.34011
NADH(P)-binding	6	14	949	8411	3.8	0.0150796	1.82	TRINITY_DN99487_c1_g1_m.35309 TRINITY_DN78180_c0_g2_m.19215 TRINITY_DN87862_c0_g1_m.22242 TRINITY_DN93790_c1_g1_m.27085 TRINITY_DN89659_c0_g1_m.23268 TRINITY_DN94287_c0_g1_m.27632
Universal stress protein family	7	20	949	8411	3.1	0.01948	1.71	TRINITY_DN99650_c0_g1_m.35583 TRINITY_DN96118_c0_g1_m.30063 TRINITY_DN96052_c0_g1_m.29986 TRINITY_DN89219_c0_g1_m.22979 TRINITY_DN76591_c0_g2_m.18968 TRINITY_DN97532_c1_g1_m.32170 TRINITY_DN96052_c0_g2_m.29987
