# Supplementary material for: Qualitative Proteome-Wide Analysis Reveals the Diverse Functions of Lysine Crotonylation in Dendrobium huoshanense
Source: Front Plant Sci. 2022 Feb 16;13:822374. doi: 10.3389/fpls.2022.822374 (PMC8888884; doi:10.3389/fpls.2022.822374)
Supplement: Supplementary file 5 [file Table_4.XLSX]

## Sheet: motif annotation
Protein accession	Position	Amino acid	Motif logo
TRINITY_DN104654_c1_g1_m.9482	177	K	xxxxxxxxxx_K_Vxxxxxxxxx
TRINITY_DN104351_c2_g2_m.8804	271	K	xxxxxxxxxx_K_Exxxxxxxxx
TRINITY_DN97425_c0_g1_m.31997	373	K	xxxxxxxxxx_K_Exxxxxxxxx
TRINITY_DN96743_c10_g1_m.30998	41	K	xxxxxxxxxx_K_Dxxxxxxxxx
TRINITY_DN104176_c8_g1_m.8436	472	K	xxxxxxxxxx_K_Vxxxxxxxxx
TRINITY_DN94387_c0_g1_m.27786	268	K	xxxxxxxxxV_K_xxxxxxxxxx
TRINITY_DN100616_c1_g1_m.1117	369	K	xKxxxxxxxx_K_xxxxxxxxxx
TRINITY_DN93605_c0_g1_m.26848	427	K	xxxxxxxxxx_K_Dxxxxxxxxx
TRINITY_DN42304_c0_g1_m.16189	314	K	xxxxxxxxxA_K_xxxxxxxxxx
TRINITY_DN100689_c3_g3_m.1267	373	K	xxxxxxxxxx_K_Exxxxxxxxx
TRINITY_DN88359_c0_g1_m.22495	322	K	xxxxxxxxxA_K_xxxxxxxxxx
TRINITY_DN91017_c0_g1_m.24351	196	K	xxxxxxxxxx_K_Gxxxxxxxxx
TRINITY_DN98164_c0_g1_m.33135	414	K	xxxxxxxxxx_K_Vxxxxxxxxx
TRINITY_DN83379_c0_g1_m.20462	673	K	xxxxxxxxxx_K_Exxxxxxxxx
TRINITY_DN104289_c4_g1_m.8672	216	K	xKxxxxxxxx_K_xxxxxxxxxx
TRINITY_DN94846_c3_g1_m.28316	85	K	xxxxxxxxxV_K_xxxxxxxxxx
TRINITY_DN93615_c0_g10_m.26862	203	K	xxxxxxxxxV_K_xxxxxxxxxx
TRINITY_DN95507_c1_g1_m.29232	610	K	xxxxxxxxxx_K_Exxxxxxxxx
TRINITY_DN93354_c0_g1_m.26546	227	K	xKxxxxxxxx_K_xxxxxxxxxx
TRINITY_DN88730_c0_g1_m.22704	127	K	xKxxxxxxxx_K_xxxxxxxxxx
TRINITY_DN93599_c0_g1_m.26841	123	K	xxxxxxxxxx_K_Vxxxxxxxxx
TRINITY_DN99573_c0_g2_m.35432	200	K	xxxxxxxxxA_K_xxxxxxxxxx
TRINITY_DN103712_c0_g2_m.7439	751	K	xxxxxxxxxA_K_xxxxxxxxxx
TRINITY_DN104761_c0_g19_m.9708	160	K	xxxxxxxxxA_K_xxxxxxxxxx
TRINITY_DN94453_c1_g2_m.27864	125	K	xxxxxxxxxx_K_Exxxxxxxxx
TRINITY_DN83486_c0_g1_m.20488	54	K	xKxxxxxxxx_K_xxxxxxxxxx
TRINITY_DN88372_c0_g1_m.22502	88	K	xxxxxxxxxx_K_xxxxExxxxx
TRINITY_DN97369_c5_g8_m.31913	152	K	xxxxxxxxxx_K_xxxxExxxxx
TRINITY_DN90945_c0_g1_m.24299	236	K	xxxxxxxxxY_K_xxxxxxxxxx
TRINITY_DN93402_c0_g1_m.26596	94	K	xKxxxxxxxx_K_xxxxxxxxxx
TRINITY_DN96287_c0_g1_m.30344	9	K	xxxxxxxxxx_K_Dxxxxxxxxx
TRINITY_DN97585_c0_g1_m.32246	19	K	xxxxxxxxxx_K_Dxxxxxxxxx
TRINITY_DN27637_c0_g1_m.15649	136	K	xxxxxxxxxA_K_xxxxxxxxxx
TRINITY_DN99920_c0_g1_m.36052	127	K	xxxxxxxxxx_K_Gxxxxxxxxx
TRINITY_DN92162_c0_g1_m.25376	482	K	xxxxxxxxxA_K_xxxxxxxxxx
TRINITY_DN67778_c0_g1_m.17831	53	K	xxxxxxxxxA_K_xxxxxxxxxx
TRINITY_DN99755_c0_g1_m.35750	252	K	xxxxxxxxxA_K_xxxxxxxxxx
TRINITY_DN94008_c0_g1_m.27326	143	K	xxxxxxxxxx_K_Exxxxxxxxx
TRINITY_DN98401_c1_g1_m.33568	75	K	xxxxxxxxxV_K_xxxxxxxxxx
TRINITY_DN98089_c1_g3_m.33032	184	K	xKxxxxxxxx_K_xxxxxxxxxx
TRINITY_DN92006_c0_g1_m.25220	230	K	xxxxxxxxxx_K_Vxxxxxxxxx
TRINITY_DN91436_c0_g1_m.24722	200	K	xxxxxxxxxV_K_xxxxxxxxxx
TRINITY_DN79262_c0_g1_m.19430	490	K	xxxxxxxxxx_K_Dxxxxxxxxx
TRINITY_DN101626_c2_g6_m.3096	234	K	xxxxxxxxxA_K_xxxxxxxxxx
TRINITY_DN105877_c16_g1_m.12207	72	K	xxxxxxxxxx_K_Dxxxxxxxxx
TRINITY_DN100516_c7_g1_m.909	257	K	xxxxxxxxxA_K_xxxxxxxxxx
TRINITY_DN63741_c0_g1_m.17529	323	K	xxxxxxxxxA_K_xxxxxxxxxx
TRINITY_DN72971_c0_g1_m.18457	158	K	xxxxxxxxxx_K_xxxxExxxxx
TRINITY_DN100885_c2_g3_m.1615	72	K	xxxxxxxxxx_K_Exxxxxxxxx
TRINITY_DN93599_c0_g1_m.26841	105	K	xKxxxxxxxx_K_xxxxxxxxxx
TRINITY_DN97480_c1_g1_m.32093	381	K	xKxxxxxxxx_K_xxxxxxxxxx
TRINITY_DN93690_c0_g1_m.26952	5	K	xxxxxxxxxx_K_Vxxxxxxxxx
TRINITY_DN104037_c3_g1_m.8129	1549	K	xxxxxxxxxx_K_Dxxxxxxxxx
TRINITY_DN101641_c0_g1_m.3119	204	K	xxxxxxxxxx_K_xxxxExxxxx
TRINITY_DN86124_c0_g9_m.21429	198	K	xxxxxxxxxx_K_xxxxExxxxx
TRINITY_DN99964_c0_g1_m.36129	187	K	xKxxxxxxxx_K_xxxxxxxxxx
TRINITY_DN92204_c0_g2_m.25413	187	K	xKxxxxxxxx_K_xxxxxxxxxx
TRINITY_DN96884_c0_g1_m.31191	115	K	xKxxxxxxxx_K_xxxxxxxxxx
TRINITY_DN105048_c0_g1_m.10416	75	K	xxxxxxxxxx_K_Axxxxxxxxx
TRINITY_DN97057_c0_g1_m.31419	208	K	xxxxxxxxxx_K_Dxxxxxxxxx
TRINITY_DN73357_c1_g3_m.18513	7	K	xxxxxxxxxx_K_Axxxxxxxxx
TRINITY_DN91142_c0_g1_m.24452	223	K	xxxxxxxxxx_K_Axxxxxxxxx
TRINITY_DN67778_c0_g1_m.17831	155	K	xxxxxxxxxx_K_Dxxxxxxxxx
TRINITY_DN99292_c0_g1_m.34995	550	K	xxxxxxxxxx_K_Exxxxxxxxx
TRINITY_DN80569_c0_g1_m.19724	132	K	xxxxxxxxxx_K_Exxxxxxxxx
TRINITY_DN79854_c0_g1_m.19563	111	K	xxxxxxxxxY_K_xxxxxxxxxx
TRINITY_DN101071_c1_g1_m.1963	48	K	xxxxxxxxxx_K_Axxxxxxxxx
TRINITY_DN83980_c0_g1_m.20661	285	K	xxxxxxxxxx_K_Exxxxxxxxx
TRINITY_DN102126_c0_g1_m.4011	169	K	xxxxxxxxxA_K_xxxxxxxxxx
TRINITY_DN98355_c3_g1_m.33480	87	K	xxxxxxxxxx_K_Exxxxxxxxx
TRINITY_DN89321_c0_g1_m.23055	511	K	xxxxxxxxxV_K_xxxxxxxxxx
TRINITY_DN94453_c1_g2_m.27864	58	K	xxxxxxxxxA_K_xxxxxxxxxx
TRINITY_DN97332_c1_g1_m.31858	62	K	xxxxxxxxxx_K_Axxxxxxxxx
TRINITY_DN97928_c0_g1_m.32775	272	K	xxxKxxxExx_K_xxxxxxxxxx
TRINITY_DN104961_c1_g2_m.10230	427	K	xxxxxxxxxV_K_xxxxxxxxxx
TRINITY_DN96265_c0_g1_m.30304	344	K	xKxxxxxxxx_K_xxxxxxxxxx
TRINITY_DN98215_c3_g19_m.33207	122	K	xxxxxxxxxx_K_Axxxxxxxxx
TRINITY_DN103721_c0_g1_m.7466	321	K	xxxxxxxxxx_K_Vxxxxxxxxx
TRINITY_DN83210_c0_g1_m.20393	185	K	xxxxxxxxxx_K_Dxxxxxxxxx
TRINITY_DN78853_c0_g1_m.19329	14	K	xxxxxxxxxx_K_Vxxxxxxxxx
TRINITY_DN93222_c1_g1_m.26398	103	K	xxxxxxxxxx_K_Axxxxxxxxx
TRINITY_DN103181_c0_g1_m.6251	327	K	xxxKxxxExx_K_xxxxxxxxxx
TRINITY_DN97745_c0_g1_m.32480	374	K	xxxxxxxxxx_K_Axxxxxxxxx
TRINITY_DN99292_c0_g1_m.34995	147	K	xxxxxxxxxV_K_xxxxxxxxxx
TRINITY_DN101419_c5_g1_m.2655	199	K	xxxxxxxxxx_K_xxxxExxxxx
TRINITY_DN95507_c1_g1_m.29232	555	K	xxxxxxxxxA_K_xxxxxxxxxx
TRINITY_DN103612_c1_g1_m.7239	10	K	xxxxxxxxxx_K_Dxxxxxxxxx
TRINITY_DN94281_c0_g1_m.27627	63	K	xxxxxxxxxx_K_Dxxxxxxxxx
TRINITY_DN105189_c5_g1_m.10750	165	K	xxxxxxxxxx_K_Exxxxxxxxx
TRINITY_DN83266_c0_g1_m.20420	254	K	xxxxxxxxxA_K_xxxxxxxxxx
TRINITY_DN101312_c0_g1_m.2433	264	K	xxxKxxxExx_K_xxxxxxxxxx
TRINITY_DN94529_c0_g1_m.27959	226	K	xxxxxxxxxx_K_Exxxxxxxxx
TRINITY_DN97250_c0_g1_m.31741	42	K	xxxKxxxExx_K_xxxxxxxxxx
TRINITY_DN87862_c0_g1_m.22242	89	K	xxxxxxxxxA_K_xxxxxxxxxx
TRINITY_DN90075_c0_g1_m.23577	54	K	xxxxxxxxxA_K_xxxxxxxxxx
TRINITY_DN87266_c0_g1_m.21965	302	K	xxxxxxxxxY_K_xxxxxxxxxx
TRINITY_DN92746_c0_g1_m.25927	68	K	xxxxxxxxxx_K_Exxxxxxxxx
TRINITY_DN96222_c0_g1_m.30232	161	K	xxxxxxxxxx_K_Axxxxxxxxx
TRINITY_DN100754_c0_g2_m.1384	113	K	xxxxxxxxxA_K_xxxxxxxxxx
TRINITY_DN81995_c0_g1_m.20084	93	K	xxxxxxxxxx_K_Exxxxxxxxx
TRINITY_DN97743_c1_g1_m.32474	241	K	xxxxxxxxxA_K_xxxxxxxxxx
TRINITY_DN96205_c1_g1_m.30205	41	K	xxxxxxxxxA_K_xxxxxxxxxx
TRINITY_DN94529_c0_g1_m.27959	233	K	xxxKxxxExx_K_xxxxxxxxxx
TRINITY_DN99012_c0_g1_m.34527	152	K	xxxxxxxxxx_K_Exxxxxxxxx
TRINITY_DN99087_c5_g1_m.34634	819	K	xxxxxxxxxx_K_Exxxxxxxxx
TRINITY_DN99096_c0_g1_m.34648	278	K	xxxxxxxxxx_K_Vxxxxxxxxx
TRINITY_DN100487_c0_g2_m.846	296	K	xxxxxxxxxx_K_Vxxxxxxxxx
TRINITY_DN97843_c0_g1_m.32632	135	K	xxxxxxxxxA_K_xxxxxxxxxx
TRINITY_DN91844_c6_g2_m.25075	120	K	xxxxxxxxxx_K_Axxxxxxxxx
TRINITY_DN63502_c0_g1_m.17512	138	K	xxxxxxxxxx_K_Exxxxxxxxx
TRINITY_DN96519_c0_g1_m.30665	270	K	xxxxxxxxxV_K_xxxxxxxxxx
TRINITY_DN99827_c1_g2_m.35883	169	K	xxxxxxxxxA_K_xxxxxxxxxx
TRINITY_DN27637_c0_g1_m.15649	84	K	xxxxxxxxxx_K_Exxxxxxxxx
TRINITY_DN91288_c0_g1_m.24589	47	K	xxxxxxxxxx_K_Gxxxxxxxxx
TRINITY_DN93988_c2_g1_m.27309	53	K	xxxxxxxxxx_K_Exxxxxxxxx
TRINITY_DN100763_c0_g1_m.1391	220	K	xxxxxxxxxY_K_xxxxxxxxxx
TRINITY_DN103493_c0_g1_m.6956	416	K	xxxxxxxxxx_K_Dxxxxxxxxx
TRINITY_DN94639_c0_g2_m.28077	321	K	xxxxxxxxxV_K_xxxxxxxxxx
TRINITY_DN103181_c0_g1_m.6251	11	K	xxxxxxxxxV_K_xxxxxxxxxx
TRINITY_DN100500_c0_g1_m.867	413	K	xxxxxxxxxx_K_Exxxxxxxxx
TRINITY_DN87616_c0_g1_m.22101	131	K	xxxxxxxxxx_K_Gxxxxxxxxx
TRINITY_DN89147_c0_g1_m.22936	66	K	xxxxxxxxxx_K_Vxxxxxxxxx
TRINITY_DN83980_c0_g1_m.20661	101	K	xxxxxxxxxx_K_Exxxxxxxxx
TRINITY_DN96239_c1_g1_m.30258	45	K	xxxxxxxxxx_K_Axxxxxxxxx
TRINITY_DN94529_c0_g1_m.27959	416	K	xxxxxxxxxA_K_xxxxxxxxxx
TRINITY_DN97250_c0_g1_m.31741	21	K	xxxxxxxxxx_K_Exxxxxxxxx
TRINITY_DN94819_c0_g1_m.28287	212	K	xxxxxxxxxx_K_Exxxxxxxxx
TRINITY_DN93893_c3_g1_m.27195	111	K	xxxxxxxxxx_K_Gxxxxxxxxx
TRINITY_DN98107_c0_g1_m.33063	391	K	xxxxxxxxxx_K_Exxxxxxxxx
TRINITY_DN93133_c3_g1_m.26310	360	K	xxxxxxxxxx_K_Axxxxxxxxx
TRINITY_DN52351_c0_g1_m.16713	151	K	xxxxxxxxxx_K_Vxxxxxxxxx
TRINITY_DN98164_c0_g1_m.33135	422	K	xxxxxxxxxx_K_Dxxxxxxxxx
TRINITY_DN83980_c0_g1_m.20661	249	K	xxxxxxxxxx_K_Axxxxxxxxx
TRINITY_DN88372_c0_g1_m.22502	78	K	xxxxxxxxxx_K_xxxxExxxxx
TRINITY_DN99292_c0_g1_m.34995	261	K	xxxxxxxxxx_K_xxxxExxxxx
TRINITY_DN102902_c1_g3_m.5661	80	K	xKxxxxxxxx_K_xxxxxxxxxx
TRINITY_DN101419_c5_g1_m.2655	209	K	xxxxxxxxxx_K_Exxxxxxxxx
TRINITY_DN93534_c0_g1_m.26745	208	K	xxxxxxxxxA_K_xxxxxxxxxx
TRINITY_DN99793_c2_g1_m.35818	171	K	xxxxxxxxxx_K_Exxxxxxxxx
TRINITY_DN99573_c0_g2_m.35432	54	K	xxxxxxxxxx_K_Gxxxxxxxxx
TRINITY_DN100208_c0_g1_m.344	78	K	xxxxxxxxxA_K_xxxxxxxxxx
TRINITY_DN92120_c0_g1_m.25332	222	K	xxxxxxxxxV_K_xxxxxxxxxx
TRINITY_DN99905_c0_g1_m.36022	189	K	xxxxxxxxxx_K_xxxxExxxxx
TRINITY_DN92499_c0_g1_m.25713	576	K	xxxxxxxxxx_K_Exxxxxxxxx
TRINITY_DN104037_c3_g1_m.8129	391	K	xxxxxxxxxx_K_Exxxxxxxxx
TRINITY_DN96113_c0_g1_m.30053	262	K	xxxxxxxxxx_K_Exxxxxxxxx
TRINITY_DN100512_c0_g4_m.891	54	K	xxxxxxxxxx_K_Axxxxxxxxx
TRINITY_DN96387_c0_g1_m.30470	170	K	xKxxxxxxxx_K_xxxxxxxxxx
TRINITY_DN100485_c0_g1_m.839	39	K	xxxxxxxxxx_K_xxxxExxxxx
TRINITY_DN100516_c5_g1_m.907	51	K	xxxxxxxxxA_K_xxxxxxxxxx
TRINITY_DN1448_c0_g1_m.15205	62	K	xxxxxxxxxx_K_Axxxxxxxxx
TRINITY_DN100431_c0_g1_m.747	140	K	xxxxxxxxxx_K_Gxxxxxxxxx
TRINITY_DN100585_c1_g1_m.1061	89	K	xxxxxxxxxx_K_Exxxxxxxxx
TRINITY_DN102274_c10_g2_m.4304	39	K	xxxxxxxxxx_K_Exxxxxxxxx
TRINITY_DN95671_c6_g1_m.29456	233	K	xxxxxxxxxx_K_Vxxxxxxxxx
TRINITY_DN95012_c0_g1_m.28504	364	K	xxxxxxxxxx_K_Dxxxxxxxxx
TRINITY_DN103413_c0_g1_m.6788	483	K	xxxxxxxxxx_K_Axxxxxxxxx
TRINITY_DN98473_c0_g2_m.33674	461	K	xxxxxxxxxx_K_Exxxxxxxxx
TRINITY_DN72971_c0_g1_m.18457	143	K	xxxxxxxxxx_K_Exxxxxxxxx
TRINITY_DN103997_c0_g2_m.8041	887	K	xxxxxxxxxx_K_Exxxxxxxxx
TRINITY_DN96494_c0_g1_m.30626	309	K	xxxxxxxxxx_K_Dxxxxxxxxx
TRINITY_DN100156_c5_g1_m.262	218	K	xxxxxxxxxx_K_Vxxxxxxxxx
TRINITY_DN102012_c1_g1_m.3775	180	K	xxxxxxxxxx_K_Axxxxxxxxx
TRINITY_DN94143_c0_g1_m.27480	493	K	xxxxxxxxxx_K_Exxxxxxxxx
TRINITY_DN99970_c0_g3_m.36146	326	K	xxxxxxxxxx_K_Vxxxxxxxxx
TRINITY_DN94046_c0_g1_m.27370	203	K	xxxxxxxxxA_K_xxxxxxxxxx
TRINITY_DN99487_c1_g1_m.35309	155	K	xxxxxxxxxx_K_Exxxxxxxxx
TRINITY_DN100081_c0_g1_m.121	319	K	xxxxxxxxxA_K_xxxxxxxxxx
TRINITY_DN90631_c0_g1_m.24016	77	K	xxxxxxxxxV_K_xxxxxxxxxx
TRINITY_DN92746_c0_g1_m.25927	170	K	xxxxxxxxxx_K_Exxxxxxxxx
TRINITY_DN88222_c0_g1_m.22415	111	K	xxxxxxxxxY_K_xxxxxxxxxx
TRINITY_DN99100_c0_g1_m.34657	213	K	xxxxxxxxxx_K_xxxxExxxxx
TRINITY_DN101786_c0_g2_m.3371	434	K	xxxxxxxxxx_K_Dxxxxxxxxx
TRINITY_DN99770_c1_g1_m.35778	27	K	xxxxxxxxxx_K_xxxxExxxxx
TRINITY_DN83574_c0_g1_m.20510	231	K	xxxxxxxxxA_K_xxxxxxxxxx
TRINITY_DN80569_c0_g1_m.19724	267	K	xxxxxxxxxx_K_Dxxxxxxxxx
TRINITY_DN97804_c0_g7_m.32570	177	K	xxxxxxxxxx_K_Gxxxxxxxxx
TRINITY_DN98360_c0_g2_m.33491	70	K	xxxxxxxxxx_K_Exxxxxxxxx
TRINITY_DN99096_c0_g1_m.34648	282	K	xxxxxxxxxx_K_xxxxExxxxx
TRINITY_DN88730_c0_g1_m.22704	220	K	xxxxxxxxxA_K_xxxxxxxxxx
TRINITY_DN91989_c0_g1_m.25210	144	K	xxxxxxxxxx_K_Vxxxxxxxxx
TRINITY_DN97459_c0_g1_m.32055	185	K	xxxxxxxxxA_K_xxxxxxxxxx
TRINITY_DN103612_c1_g1_m.7236	180	K	xKxxxxxxxx_K_xxxxxxxxxx
TRINITY_DN101786_c0_g2_m.3371	432	K	xKxxxxxxxx_K_xxxxxxxxxx
TRINITY_DN103071_c1_g6_m.6030	228	K	xxxxxxxxxx_K_Exxxxxxxxx
TRINITY_DN97788_c0_g2_m.32544	177	K	xxxxxxxxxx_K_Axxxxxxxxx
TRINITY_DN105113_c0_g1_m.10566	135	K	xxxxxxxxxx_K_Gxxxxxxxxx
TRINITY_DN84161_c0_g1_m.20721	86	K	xxxxxxxxxx_K_Axxxxxxxxx
TRINITY_DN90459_c0_g1_m.23908	171	K	xKxxxxxxxx_K_xxxxxxxxxx
TRINITY_DN83486_c0_g1_m.20488	171	K	xxxxxxxxxx_K_Exxxxxxxxx
TRINITY_DN92120_c0_g1_m.25332	114	K	xxxxxxxxxx_K_Gxxxxxxxxx
TRINITY_DN93776_c0_g1_m.27066	178	K	xKxxxxxxxx_K_xxxxxxxxxx
TRINITY_DN102736_c1_g2_m.5304	203	K	xxxxxxxxxx_K_Gxxxxxxxxx
TRINITY_DN90760_c1_g1_m.24134	235	K	xxxxxxxxxA_K_xxxxxxxxxx
TRINITY_DN95077_c0_g2_m.28591	35	K	xxxxxxxxxY_K_xxxxxxxxxx
TRINITY_DN99096_c0_g1_m.34648	167	K	xxxxxxxxxx_K_Vxxxxxxxxx
TRINITY_DN88730_c0_g1_m.22704	342	K	xxxxxxxxxA_K_xxxxxxxxxx
TRINITY_DN92907_c0_g1_m.26099	886	K	xxxxxxxxxx_K_Dxxxxxxxxx
TRINITY_DN98385_c0_g1_m.33538	245	K	xxxxxxxxxx_K_Exxxxxxxxx
TRINITY_DN94270_c0_g1_m.27619	133	K	xxxxxxxxxx_K_Dxxxxxxxxx
TRINITY_DN103908_c1_g1_m.7878	100	K	xxxxxxxxxx_K_Vxxxxxxxxx
TRINITY_DN97480_c1_g1_m.32093	274	K	xxxxxxxxxx_K_xxxxExxxxx
TRINITY_DN106262_c0_g1_m.12661	50	K	xxxxxxxxxx_K_Axxxxxxxxx
TRINITY_DN98215_c3_g14_m.33205	9	K	xxxxxxxxxx_K_Axxxxxxxxx
TRINITY_DN97789_c2_g1_m.32547	897	K	xKxxxxxxxx_K_xxxxxxxxxx
TRINITY_DN94389_c1_g1_m.27790	367	K	xKxxxxxxxx_K_xxxxxxxxxx
TRINITY_DN104943_c0_g1_m.10199	127	K	xxxxxxxxxY_K_xxxxxxxxxx
TRINITY_DN97293_c0_g1_m.31810	58	K	xxxxxxxxxx_K_Exxxxxxxxx
TRINITY_DN87916_c0_g1_m.22279	64	K	xKxxxxxxxx_K_xxxxxxxxxx
TRINITY_DN92586_c0_g1_m.25788	100	K	xxxxxxxxxx_K_xxxxExxxxx
TRINITY_DN92499_c0_g1_m.25713	363	K	xxxxxxxxxA_K_xxxxxxxxxx
TRINITY_DN95475_c0_g1_m.29199	224	K	xxxxxxxxxx_K_Exxxxxxxxx
TRINITY_DN63502_c0_g1_m.17512	174	K	xxxxxxxxxx_K_Gxxxxxxxxx
TRINITY_DN100526_c0_g1_m.927	568	K	xKxxxxxxxx_K_xxxxxxxxxx
TRINITY_DN101648_c0_g1_m.3129	80	K	xxxxxxxxxx_K_Gxxxxxxxxx
TRINITY_DN100763_c0_g1_m.1391	310	K	xxxxxxxxxA_K_xxxxxxxxxx
TRINITY_DN89275_c0_g1_m.23022	502	K	xxxxxxxxxx_K_xxxxExxxxx
TRINITY_DN104085_c0_g1_m.8253	62	K	xxxxxxxxxx_K_Vxxxxxxxxx
TRINITY_DN90340_c0_g1_m.23805	314	K	xKxxxxxxxx_K_xxxxxxxxxx
TRINITY_DN97480_c1_g1_m.32093	329	K	xxxxxxxxxA_K_xxxxxxxxxx
TRINITY_DN94529_c0_g1_m.27959	198	K	xxxxxxxxxx_K_Gxxxxxxxxx
TRINITY_DN100242_c0_g1_m.405	248	K	xxxxxxxxxV_K_xxxxxxxxxx
TRINITY_DN99606_c0_g1_m.35495	411	K	xxxKxxxExx_K_xxxxxxxxxx
TRINITY_DN83248_c0_g1_m.20411	121	K	xxxxxxxxxV_K_xxxxxxxxxx
TRINITY_DN91677_c1_g1_m.24945	6	K	xxxxxxxxxx_K_Axxxxxxxxx
TRINITY_DN96424_c0_g1_m.30528	204	K	xxxxxxxxxA_K_xxxxxxxxxx
TRINITY_DN52351_c0_g1_m.16713	176	K	xxxKxxxExx_K_xxxxxxxxxx
TRINITY_DN86137_c0_g1_m.21438	228	K	xxxxxxxxxx_K_Exxxxxxxxx
TRINITY_DN95482_c0_g1_m.29206	313	K	xxxxxxxxxx_K_Vxxxxxxxxx
TRINITY_DN67778_c0_g1_m.17831	93	K	xxxxxxxxxx_K_Gxxxxxxxxx
TRINITY_DN102299_c3_g1_m.4368	43	K	xxxxxxxxxx_K_Exxxxxxxxx
TRINITY_DN64209_c0_g1_m.17563	191	K	xxxxxxxxxV_K_xxxxxxxxxx
TRINITY_DN105134_c0_g1_m.10617	233	K	xxxxxxxxxx_K_Axxxxxxxxx
TRINITY_DN93189_c1_g1_m.26362	331	K	xxxxxxxxxx_K_Exxxxxxxxx
TRINITY_DN98713_c0_g2_m.34024	203	K	xxxxxxxxxx_K_Axxxxxxxxx
TRINITY_DN102274_c10_g2_m.4304	82	K	xxxxxxxxxA_K_xxxxxxxxxx
TRINITY_DN88405_c0_g1_m.22523	97	K	xxxxxxxxxx_K_Dxxxxxxxxx
TRINITY_DN94276_c0_g2_m.27625	16	K	xxxKxxxExx_K_xxxxxxxxxx
TRINITY_DN94143_c0_g1_m.27480	298	K	xxxxxxxxxx_K_Gxxxxxxxxx
TRINITY_DN78180_c0_g2_m.19215	237	K	xxxxxxxxxx_K_Dxxxxxxxxx
TRINITY_DN102024_c1_g1_m.3805	16	K	xxxxxxxxxx_K_Exxxxxxxxx
TRINITY_DN102766_c0_g2_m.5370	357	K	xxxxxxxxxx_K_Dxxxxxxxxx
TRINITY_DN82781_c0_g1_m.20269	435	K	xxxxxxxxxx_K_Axxxxxxxxx
TRINITY_DN97282_c0_g1_m.31786	592	K	xxxxxxxxxx_K_Exxxxxxxxx
TRINITY_DN102564_c0_g1_m.4983	366	K	xxxxxxxxxx_K_Gxxxxxxxxx
TRINITY_DN69158_c0_g1_m.17980	86	K	xxxxxxxxxx_K_Exxxxxxxxx
TRINITY_DN89321_c0_g1_m.23055	100	K	xxxxxxxxxx_K_Gxxxxxxxxx
TRINITY_DN87916_c0_g1_m.22279	171	K	xxxxxxxxxx_K_Vxxxxxxxxx
TRINITY_DN98391_c0_g1_m.33545	137	K	xxxKxxxExx_K_xxxxxxxxxx
TRINITY_DN95820_c0_g1_m.29646	237	K	xxxxxxxxxx_K_Exxxxxxxxx
TRINITY_DN98907_c1_g2_m.34338	100	K	xxxxxxxxxx_K_Dxxxxxxxxx
TRINITY_DN94008_c0_g1_m.27326	132	K	xxxxxxxxxx_K_xxxxExxxxx
TRINITY_DN79678_c0_g1_m.19522	153	K	xxxxxxxxxx_K_Dxxxxxxxxx
TRINITY_DN95236_c2_g1_m.28822	236	K	xKxxxxxxxx_K_xxxxxxxxxx
TRINITY_DN104983_c2_g2_m.10276	711	K	xxxxxxxxxx_K_Dxxxxxxxxx
TRINITY_DN104344_c3_g4_m.8784	70	K	xxxxxxxxxV_K_xxxxxxxxxx
TRINITY_DN73715_c0_g1_m.18577	95	K	xxxxxxxxxA_K_xxxxxxxxxx
TRINITY_DN99117_c0_g1_m.34685	724	K	xxxxxxxxxx_K_Exxxxxxxxx
TRINITY_DN100871_c1_g2_m.1578	134	K	xxxKxxxExx_K_xxxxxxxxxx
TRINITY_DN92372_c0_g1_m.25575	413	K	xxxxxxxxxx_K_Dxxxxxxxxx
TRINITY_DN95121_c0_g1_m.28653	333	K	xxxxxxxxxx_K_Dxxxxxxxxx
TRINITY_DN88657_c0_g1_m.22651	60	K	xxxxxxxxxx_K_Dxxxxxxxxx
TRINITY_DN100988_c0_g2_m.1794	359	K	xxxxxxxxxx_K_Gxxxxxxxxx
TRINITY_DN86752_c0_g1_m.21719	35	K	xKxxxxxxxx_K_xxxxxxxxxx
TRINITY_DN64704_c0_g1_m.17597	173	K	xxxxxxxxxY_K_xxxxxxxxxx
TRINITY_DN93720_c1_g1_m.26996	191	K	xKxxxxxxxx_K_xxxxxxxxxx
TRINITY_DN95586_c1_g1_m.29350	75	K	xxxxxxxxxA_K_xxxxxxxxxx
TRINITY_DN102283_c3_g9_m.4332	57	K	xKxxxxxxxx_K_xxxxxxxxxx
TRINITY_DN90682_c0_g1_m.24073	148	K	xxxxxxxxxx_K_Exxxxxxxxx
TRINITY_DN104761_c0_g12_m.9706	71	K	xxxxxxxxxx_K_Dxxxxxxxxx
TRINITY_DN95130_c0_g3_m.28664	60	K	xxxxxxxxxA_K_xxxxxxxxxx
TRINITY_DN96438_c0_g1_m.30539	811	K	xxxxxxxxxx_K_Exxxxxxxxx
TRINITY_DN93720_c1_g1_m.26996	143	K	xxxxxxxxxA_K_xxxxxxxxxx
TRINITY_DN93312_c0_g1_m.26501	72	K	xxxxxxxxxx_K_Exxxxxxxxx
TRINITY_DN96393_c0_g2_m.30479	210	K	xxxxxxxxxx_K_Axxxxxxxxx
TRINITY_DN98485_c0_g1_m.33682	325	K	xxxxxxxxxx_K_Exxxxxxxxx
TRINITY_DN95249_c2_g1_m.28839	154	K	xxxxxxxxxx_K_Exxxxxxxxx
TRINITY_DN87266_c0_g1_m.21965	497	K	xxxKxxxExx_K_xxxxxxxxxx
TRINITY_DN88918_c2_g1_m.22825	298	K	xxxxxxxxxx_K_Dxxxxxxxxx
TRINITY_DN80640_c0_g1_m.19745	54	K	xxxxxxxxxx_K_xxxxExxxxx
TRINITY_DN103764_c5_g1_m.7573	295	K	xxxxxxxxxx_K_Gxxxxxxxxx
TRINITY_DN100763_c0_g1_m.1391	685	K	xxxxxxxxxx_K_Vxxxxxxxxx
TRINITY_DN89321_c0_g1_m.23055	198	K	xxxxxxxxxx_K_xxxxExxxxx
TRINITY_DN95859_c0_g1_m.29698	161	K	xxxxxxxxxV_K_xxxxxxxxxx
TRINITY_DN99597_c1_g1_m.35472	720	K	xxxxxxxxxx_K_Exxxxxxxxx
TRINITY_DN99292_c0_g1_m.34995	559	K	xKxxxxxxxx_K_xxxxxxxxxx
TRINITY_DN83574_c0_g1_m.20510	151	K	xxxKxxxExx_K_xxxxxxxxxx
TRINITY_DN98920_c1_g1_m.34361	31	K	xxxxxxxxxx_K_Axxxxxxxxx
TRINITY_DN88359_c0_g1_m.22495	188	K	xxxxxxxxxx_K_Axxxxxxxxx
TRINITY_DN95358_c0_g1_m.29001	269	K	xxxxxxxxxx_K_Gxxxxxxxxx
TRINITY_DN81346_c0_g1_m.19921	54	K	xKxxxxxxxx_K_xxxxxxxxxx
TRINITY_DN119962_c0_g1_m.13762	22	K	xxxxxxxxxx_K_Axxxxxxxxx
TRINITY_DN100000_c0_g1_m.1	418	K	xxxxxxxxxx_K_Vxxxxxxxxx
TRINITY_DN100329_c0_g2_m.571	282	K	xxxxxxxxxx_K_Gxxxxxxxxx
TRINITY_DN97426_c0_g3_m.31998	179	K	xxxxxxxxxA_K_xxxxxxxxxx
TRINITY_DN90416_c1_g1_m.23871	56	K	xxxxxxxxxx_K_Axxxxxxxxx
TRINITY_DN95079_c0_g1_m.28595	308	K	xxxxxxxxxx_K_Vxxxxxxxxx
TRINITY_DN88372_c0_g1_m.22502	270	K	xxxxxxxxxA_K_xxxxxxxxxx
TRINITY_DN93500_c0_g1_m.26712	102	K	xxxxxxxxxx_K_Axxxxxxxxx
TRINITY_DN99241_c0_g1_m.34895	97	K	xxxxxxxxxx_K_Exxxxxxxxx
TRINITY_DN95411_c1_g2_m.29092	324	K	xxxxxxxxxx_K_Exxxxxxxxx
TRINITY_DN83548_c0_g1_m.20503	157	K	xxxxxxxxxx_K_Exxxxxxxxx
TRINITY_DN85575_c0_g3_m.21159	158	K	xxxxxxxxxx_K_Axxxxxxxxx
TRINITY_DN92499_c0_g1_m.25713	219	K	xxxxxxxxxx_K_Dxxxxxxxxx
TRINITY_DN102041_c0_g2_m.3846	142	K	xxxxxxxxxA_K_xxxxxxxxxx
TRINITY_DN95358_c0_g1_m.29001	148	K	xxxxxxxxxx_K_Vxxxxxxxxx
TRINITY_DN99397_c1_g2_m.35183	78	K	xxxxxxxxxA_K_xxxxxxxxxx
TRINITY_DN89147_c0_g1_m.22936	113	K	xxxxxxxxxx_K_Vxxxxxxxxx
TRINITY_DN99066_c0_g1_m.34606	164	K	xxxxxxxxxx_K_Axxxxxxxxx
TRINITY_DN93650_c0_g1_m.26906	560	K	xxxxxxxxxA_K_xxxxxxxxxx
TRINITY_DN99573_c0_g2_m.35432	70	K	xxxxxxxxxx_K_Gxxxxxxxxx
TRINITY_DN100882_c0_g1_m.1611	408	K	xxxxxxxxxx_K_xxxxExxxxx
TRINITY_DN104949_c0_g1_m.10211	224	K	xxxxxxxxxx_K_xxxxExxxxx
TRINITY_DN87616_c0_g1_m.22101	75	K	xxxxxxxxxx_K_Exxxxxxxxx
TRINITY_DN104872_c1_g1_m.10030	307	K	xxxxxxxxxx_K_Axxxxxxxxx
TRINITY_DN83309_c0_g1_m.20443	9	K	xxxxxxxxxx_K_Dxxxxxxxxx
TRINITY_DN104949_c0_g1_m.10211	82	K	xxxxxxxxxx_K_xxxxExxxxx
TRINITY_DN90704_c0_g1_m.24090	69	K	xxxxxxxxxx_K_Exxxxxxxxx
TRINITY_DN63741_c0_g1_m.17529	28	K	xxxxxxxxxY_K_xxxxxxxxxx
TRINITY_DN102523_c1_g1_m.4888	549	K	xxxxxxxxxA_K_xxxxxxxxxx
TRINITY_DN93787_c0_g1_m.27080	33	K	xxxxxxxxxY_K_xxxxxxxxxx
TRINITY_DN93972_c0_g1_m.27285	242	K	xxxxxxxxxx_K_Gxxxxxxxxx
TRINITY_DN69851_c0_g3_m.18089	74	K	xxxxxxxxxx_K_Exxxxxxxxx
TRINITY_DN94990_c0_g1_m.28480	160	K	xxxxxxxxxA_K_xxxxxxxxxx
TRINITY_DN97585_c0_g1_m.32246	235	K	xxxxxxxxxx_K_Axxxxxxxxx
TRINITY_DN95994_c0_g1_m.29899	484	K	xxxxxxxxxx_K_Gxxxxxxxxx
TRINITY_DN104929_c0_g1_m.10154	92	K	xxxxxxxxxA_K_xxxxxxxxxx
TRINITY_DN98713_c0_g2_m.34024	180	K	xxxxxxxxxx_K_Exxxxxxxxx
TRINITY_DN98473_c0_g2_m.33674	454	K	xxxxxxxxxx_K_Dxxxxxxxxx
TRINITY_DN100541_c0_g1_m.953	619	K	xxxxxxxxxx_K_Dxxxxxxxxx
TRINITY_DN87721_c0_g1_m.22164	298	K	xKxxxxxxxx_K_xxxxxxxxxx
TRINITY_DN94182_c2_g1_m.27513	172	K	xxxxxxxxxx_K_Axxxxxxxxx
TRINITY_DN101600_c1_g1_m.3027	444	K	xxxxxxxxxx_K_Dxxxxxxxxx
TRINITY_DN103199_c1_g1_m.6297	31	K	xxxxxxxxxx_K_Dxxxxxxxxx
TRINITY_DN95426_c0_g1_m.29127	69	K	xxxxxxxxxx_K_Axxxxxxxxx
TRINITY_DN98473_c0_g2_m.33674	549	K	xKxxxxxxxx_K_xxxxxxxxxx
TRINITY_DN103071_c1_g6_m.6030	156	K	xxxxxxxxxx_K_Axxxxxxxxx
TRINITY_DN91759_c0_g3_m.25000	194	K	xxxxxxxxxx_K_Exxxxxxxxx
TRINITY_DN56510_c0_g1_m.16971	157	K	xxxxxxxxxx_K_Axxxxxxxxx
TRINITY_DN94272_c0_g1_m.27621	890	K	xxxxxxxxxx_K_Axxxxxxxxx
TRINITY_DN97892_c0_g1_m.32711	131	K	xxxxxxxxxx_K_Exxxxxxxxx
TRINITY_DN103721_c0_g1_m.7466	465	K	xxxxxxxxxx_K_Exxxxxxxxx
TRINITY_DN74386_c0_g1_m.18654	116	K	xKxxxxxxxx_K_xxxxxxxxxx
TRINITY_DN91578_c1_g1_m.24862	31	K	xxxxxxxxxx_K_Exxxxxxxxx
TRINITY_DN99603_c0_g2_m.35487	271	K	xxxxxxxxxx_K_Vxxxxxxxxx
TRINITY_DN96873_c0_g1_m.31179	188	K	xxxxxxxxxx_K_Axxxxxxxxx
TRINITY_DN98355_c3_g1_m.33480	52	K	xxxxxxxxxA_K_xxxxxxxxxx
TRINITY_DN83459_c0_g1_m.20478	182	K	xxxxxxxxxx_K_Axxxxxxxxx
TRINITY_DN99199_c0_g1_m.34822	301	K	xxxxxxxxxx_K_xxxxExxxxx
TRINITY_DN103814_c0_g1_m.7682	32	K	xxxxxxxxxA_K_xxxxxxxxxx
TRINITY_DN105712_c0_g3_m.11855	384	K	xxxKxxxExx_K_xxxxxxxxxx
TRINITY_DN90967_c0_g1_m.24323	132	K	xKxxxxxxxx_K_xxxxxxxxxx
TRINITY_DN100032_c1_g3_m.64	222	K	xxxxxxxxxx_K_Gxxxxxxxxx
TRINITY_DN92242_c1_g1_m.25455	708	K	xxxxxxxxxx_K_Gxxxxxxxxx
TRINITY_DN102274_c11_g5_m.4307	157	K	xxxxxxxxxV_K_xxxxxxxxxx
TRINITY_DN100541_c0_g1_m.953	720	K	xxxxxxxxxx_K_Dxxxxxxxxx
TRINITY_DN92907_c0_g1_m.26099	541	K	xxxxxxxxxx_K_Exxxxxxxxx
TRINITY_DN87616_c0_g1_m.22101	56	K	xxxxxxxxxY_K_xxxxxxxxxx
TRINITY_DN95363_c0_g1_m.29006	463	K	xxxxxxxxxx_K_Exxxxxxxxx
TRINITY_DN95236_c2_g1_m.28822	284	K	xxxxxxxxxx_K_Axxxxxxxxx
TRINITY_DN104036_c0_g2_m.8121	9	K	xxxxxxxxxx_K_Gxxxxxxxxx
TRINITY_DN105223_c2_g1_m.10826	358	K	xxxxxxxxxx_K_Gxxxxxxxxx
TRINITY_DN100081_c0_g1_m.121	234	K	xxxxxxxxxA_K_xxxxxxxxxx
TRINITY_DN98020_c0_g1_m.32928	221	K	xxxxxxxxxx_K_Exxxxxxxxx
TRINITY_DN96287_c0_g1_m.30344	106	K	xxxxxxxxxx_K_Gxxxxxxxxx
TRINITY_DN90546_c1_g1_m.23968	225	K	xxxxxxxxxx_K_Vxxxxxxxxx
TRINITY_DN95461_c0_g1_m.29183	161	K	xxxxxxxxxx_K_Dxxxxxxxxx
TRINITY_DN97819_c0_g2_m.32596	178	K	xxxxxxxxxx_K_Dxxxxxxxxx
TRINITY_DN100046_c0_g1_m.79	891	K	xxxxxxxxxA_K_xxxxxxxxxx
TRINITY_DN98391_c0_g1_m.33545	173	K	xxxxxxxxxx_K_xxxxExxxxx
TRINITY_DN79311_c0_g1_m.19445	157	K	xxxxxxxxxx_K_Axxxxxxxxx
TRINITY_DN96841_c0_g1_m.31142	348	K	xKxxxxxxxx_K_xxxxxxxxxx
TRINITY_DN100853_c0_g1_m.1554	231	K	xKxxxxxxxx_K_xxxxxxxxxx
TRINITY_DN105035_c0_g4_m.10394	156	K	xxxxxxxxxx_K_Axxxxxxxxx
TRINITY_DN87120_c0_g1_m.21906	157	K	xxxxxxxxxA_K_xxxxxxxxxx
TRINITY_DN94470_c0_g1_m.27881	23	K	xxxKxxxExx_K_xxxxxxxxxx
TRINITY_DN95396_c1_g1_m.29067	96	K	xxxxxxxxxx_K_Dxxxxxxxxx
TRINITY_DN69419_c0_g2_m.18029	60	K	xxxxxxxxxx_K_Gxxxxxxxxx
TRINITY_DN62083_c0_g1_m.17372	3	K	xxxxxxxxxx_K_Axxxxxxxxx
TRINITY_DN92233_c0_g1_m.25449	532	K	xxxxxxxxxA_K_xxxxxxxxxx
TRINITY_DN90465_c0_g1_m.23912	36	K	xxxxxxxxxx_K_Dxxxxxxxxx
TRINITY_DN103712_c0_g2_m.7439	416	K	xxxxxxxxxx_K_Axxxxxxxxx
TRINITY_DN94529_c0_g1_m.27959	269	K	xxxxxxxxxx_K_Exxxxxxxxx
TRINITY_DN93015_c0_g1_m.26197	409	K	xxxxxxxxxV_K_xxxxxxxxxx
TRINITY_DN83837_c0_g1_m.20601	202	K	xxxxxxxxxx_K_xxxxExxxxx
TRINITY_DN96413_c0_g1_m.30512	124	K	xxxxxxxxxx_K_Vxxxxxxxxx
TRINITY_DN94820_c0_g1_m.28290	130	K	xxxxxxxxxx_K_Axxxxxxxxx
TRINITY_DN101541_c4_g1_m.2910	369	K	xxxxxxxxxY_K_xxxxxxxxxx
TRINITY_DN98215_c3_g8_m.33210	57	K	xxxxxxxxxx_K_Exxxxxxxxx
TRINITY_DN99479_c0_g1_m.35288	375	K	xxxxxxxxxx_K_Exxxxxxxxx
TRINITY_DN93236_c1_g1_m.26407	182	K	xxxxxxxxxx_K_Gxxxxxxxxx
TRINITY_DN63502_c0_g1_m.17512	64	K	xxxxxxxxxV_K_xxxxxxxxxx
TRINITY_DN87438_c1_g1_m.22039	188	K	xxxxxxxxxA_K_xxxxxxxxxx
TRINITY_DN95459_c0_g1_m.29179	102	K	xxxxxxxxxx_K_Dxxxxxxxxx
TRINITY_DN101639_c0_g1_m.3117	784	K	xxxxxxxxxx_K_Gxxxxxxxxx
TRINITY_DN99516_c1_g1_m.35350	458	K	xxxxxxxxxx_K_Exxxxxxxxx
TRINITY_DN94812_c0_g1_m.28275	151	K	xKxxxxxxxx_K_xxxxxxxxxx
TRINITY_DN72971_c0_g1_m.18457	169	K	xxxxxxxxxx_K_Exxxxxxxxx
TRINITY_DN92935_c1_g1_m.26127	155	K	xxxxxxxxxA_K_xxxxxxxxxx
TRINITY_DN87602_c0_g1_m.22098	147	K	xxxxxxxxxx_K_Gxxxxxxxxx
TRINITY_DN88736_c0_g1_m.22706	179	K	xxxxxxxxxx_K_Exxxxxxxxx
TRINITY_DN99538_c0_g1_m.35383	134	K	xxxxxxxxxx_K_Exxxxxxxxx
TRINITY_DN97646_c1_g1_m.32332	118	K	xxxxxxxxxA_K_xxxxxxxxxx
TRINITY_DN99633_c2_g5_m.35546	138	K	xxxxxxxxxx_K_Vxxxxxxxxx
TRINITY_DN95087_c0_g1_m.28611	83	K	xxxxxxxxxA_K_xxxxxxxxxx
TRINITY_DN94862_c0_g1_m.28333	70	K	xxxxxxxxxx_K_Exxxxxxxxx
TRINITY_DN98401_c1_g1_m.33568	218	K	xxxxxxxxxx_K_Dxxxxxxxxx
TRINITY_DN98866_c0_g1_m.34278	41	K	xxxxxxxxxx_K_Exxxxxxxxx
TRINITY_DN90084_c0_g1_m.23590	122	K	xKxxxxxxxx_K_xxxxxxxxxx
TRINITY_DN83582_c0_g2_m.20512	165	K	xxxxxxxxxx_K_Exxxxxxxxx
TRINITY_DN95292_c0_g2_m.28911	273	K	xxxKxxxExx_K_xxxxxxxxxx
TRINITY_DN99487_c1_g1_m.35309	282	K	xxxxxxxxxx_K_Dxxxxxxxxx
TRINITY_DN76934_c0_g1_m.19035	283	K	xxxxxxxxxx_K_Gxxxxxxxxx
TRINITY_DN99674_c1_g3_m.35628	112	K	xxxxxxxxxx_K_Gxxxxxxxxx
TRINITY_DN92625_c0_g1_m.25830	330	K	xxxxxxxxxx_K_Vxxxxxxxxx
TRINITY_DN81028_c0_g1_m.19834	11	K	xxxxxxxxxx_K_Axxxxxxxxx
TRINITY_DN103154_c0_g1_m.6194	160	K	xxxxxxxxxx_K_Exxxxxxxxx
TRINITY_DN92060_c0_g1_m.25274	53	K	xxxxxxxxxx_K_Gxxxxxxxxx
TRINITY_DN95633_c0_g1_m.29414	200	K	xxxxxxxxxx_K_Dxxxxxxxxx
TRINITY_DN88730_c0_g1_m.22704	180	K	xxxxxxxxxx_K_Dxxxxxxxxx
TRINITY_DN95895_c0_g2_m.29743	30	K	xxxxxxxxxx_K_Axxxxxxxxx
TRINITY_DN56672_c0_g1_m.16982	343	K	xxxxxxxxxx_K_Vxxxxxxxxx
TRINITY_DN90546_c1_g1_m.23968	229	K	xxxxxxxxxx_K_Axxxxxxxxx
TRINITY_DN91578_c1_g1_m.24862	78	K	xxxxxxxxxx_K_Dxxxxxxxxx
TRINITY_DN91733_c0_g1_m.24987	22	K	xxxxxxxxxx_K_Exxxxxxxxx
TRINITY_DN95130_c0_g3_m.28664	140	K	xxxxxxxxxA_K_xxxxxxxxxx
TRINITY_DN73715_c0_g1_m.18577	74	K	xxxxxxxxxx_K_Vxxxxxxxxx
TRINITY_DN104485_c0_g2_m.9108	1095	K	xxxxxxxxxV_K_xxxxxxxxxx
TRINITY_DN106262_c0_g1_m.12661	26	K	xxxxxxxxxx_K_Axxxxxxxxx
TRINITY_DN102470_c0_g3_m.4759	135	K	xxxxxxxxxV_K_xxxxxxxxxx
TRINITY_DN80569_c0_g1_m.19724	438	K	xxxxxxxxxx_K_Dxxxxxxxxx
TRINITY_DN100541_c0_g1_m.953	570	K	xxxxxxxxxx_K_Axxxxxxxxx
TRINITY_DN96113_c0_g1_m.30053	59	K	xxxxxxxxxV_K_xxxxxxxxxx
TRINITY_DN98282_c0_g1_m.33347	71	K	xxxxxxxxxx_K_Gxxxxxxxxx
TRINITY_DN73357_c1_g3_m.18513	29	K	xxxxxxxxxx_K_Axxxxxxxxx
TRINITY_DN96241_c1_g1_m.30260	143	K	xxxxxxxxxY_K_xxxxxxxxxx
TRINITY_DN94774_c1_g1_m.28226	62	K	xxxKxxxExx_K_xxxxxxxxxx
TRINITY_DN88462_c0_g1_m.22559	138	K	xKxxxxxxxx_K_xxxxxxxxxx
TRINITY_DN91578_c1_g1_m.24862	22	K	xxxxxxxxxx_K_Dxxxxxxxxx
TRINITY_DN105134_c0_g1_m.10617	259	K	xKxxxxxxxx_K_xxxxxxxxxx
TRINITY_DN96841_c0_g1_m.31142	118	K	xKxxxxxxxx_K_xxxxxxxxxx
TRINITY_DN92551_c0_g1_m.25760	207	K	xxxxxxxxxV_K_xxxxxxxxxx
TRINITY_DN98702_c0_g1_m.34011	451	K	xxxxxxxxxx_K_Gxxxxxxxxx
TRINITY_DN94662_c0_g1_m.28114	305	K	xxxxxxxxxx_K_xxxxExxxxx
TRINITY_DN95046_c0_g1_m.28550	140	K	xxxxxxxxxA_K_xxxxxxxxxx
TRINITY_DN100617_c0_g1_m.1121	354	K	xKxxxxxxxx_K_xxxxxxxxxx
TRINITY_DN92162_c0_g1_m.25376	644	K	xxxxxxxxxx_K_xxxxExxxxx
TRINITY_DN92664_c0_g1_m.25852	134	K	xxxKxxxExx_K_xxxxxxxxxx
TRINITY_DN97745_c0_g1_m.32480	417	K	xxxxxxxxxx_K_Vxxxxxxxxx
TRINITY_DN99573_c0_g2_m.35432	527	K	xxxxxxxxxx_K_Axxxxxxxxx
TRINITY_DN103612_c1_g1_m.7239	71	K	xxxxxxxxxV_K_xxxxxxxxxx
TRINITY_DN101092_c0_g2_m.2000	497	K	xxxxxxxxxV_K_xxxxxxxxxx
TRINITY_DN103270_c0_g1_m.6447	245	K	xxxxxxxxxx_K_Exxxxxxxxx
TRINITY_DN105344_c7_g1_m.11078	100	K	xxxxxxxxxV_K_xxxxxxxxxx
TRINITY_DN87616_c0_g1_m.22101	124	K	xxxxxxxxxx_K_Vxxxxxxxxx
TRINITY_DN90084_c0_g1_m.23590	11	K	xxxxxxxxxx_K_Dxxxxxxxxx
TRINITY_DN80819_c0_g1_m.19782	33	K	xxxxxxxxxx_K_Exxxxxxxxx
TRINITY_DN94662_c0_g1_m.28114	538	K	xxxxxxxxxx_K_Dxxxxxxxxx
TRINITY_DN96438_c0_g1_m.30539	936	K	xxxxxxxxxx_K_Vxxxxxxxxx
TRINITY_DN94662_c0_g1_m.28114	111	K	xxxxxxxxxx_K_Axxxxxxxxx
TRINITY_DN81727_c0_g1_m.20015	68	K	xKxxxxxxxx_K_xxxxxxxxxx
TRINITY_DN87639_c0_g1_m.22116	38	K	xKxxxxxxxx_K_xxxxxxxxxx
TRINITY_DN93054_c1_g1_m.26234	248	K	xxxxxxxxxx_K_Axxxxxxxxx
TRINITY_DN100340_c1_g1_m.591	318	K	xxxxxxxxxx_K_Dxxxxxxxxx
TRINITY_DN92569_c0_g1_m.25774	133	K	xxxxxxxxxV_K_xxxxxxxxxx
TRINITY_DN99603_c0_g2_m.35487	98	K	xxxxxxxxxA_K_xxxxxxxxxx
TRINITY_DN98002_c0_g2_m.32904	209	K	xxxxxxxxxx_K_Exxxxxxxxx
TRINITY_DN90034_c0_g1_m.23519	200	K	xxxxxxxxxx_K_Gxxxxxxxxx
TRINITY_DN104669_c0_g1_m.9525	770	K	xxxxxxxxxV_K_xxxxxxxxxx
TRINITY_DN84369_c0_g1_m.20773	451	K	xxxxxxxxxA_K_xxxxxxxxxx
TRINITY_DN104929_c0_g1_m.10154	102	K	xxxxxxxxxx_K_Vxxxxxxxxx
TRINITY_DN99793_c2_g1_m.35818	360	K	xxxxxxxxxV_K_xxxxxxxxxx
TRINITY_DN99516_c1_g1_m.35350	419	K	xxxxxxxxxx_K_xxxxExxxxx
TRINITY_DN95069_c0_g1_m.28582	662	K	xxxxxxxxxA_K_xxxxxxxxxx
TRINITY_DN77903_c0_g2_m.19165	35	K	xxxxxxxxxx_K_Exxxxxxxxx
TRINITY_DN95130_c0_g3_m.28664	35	K	xxxxxxxxxx_K_Axxxxxxxxx
TRINITY_DN92233_c0_g1_m.25449	131	K	xxxxxxxxxA_K_xxxxxxxxxx
TRINITY_DN92120_c0_g1_m.25332	194	K	xxxxxxxxxx_K_Gxxxxxxxxx
TRINITY_DN104085_c0_g2_m.8254	160	K	xxxxxxxxxx_K_Axxxxxxxxx
TRINITY_DN97585_c0_g1_m.32246	101	K	xxxxxxxxxx_K_xxxxExxxxx
TRINITY_DN87597_c0_g1_m.22092	265	K	xKxxxxxxxx_K_xxxxxxxxxx
TRINITY_DN91818_c0_g2_m.25054	124	K	xxxxxxxxxx_K_Vxxxxxxxxx
TRINITY_DN92383_c0_g1_m.25588	41	K	xxxxxxxxxx_K_Vxxxxxxxxx
TRINITY_DN90034_c0_g1_m.23519	205	K	xxxxxxxxxx_K_Axxxxxxxxx
TRINITY_DN81109_c0_g1_m.19854	296	K	xxxxxxxxxx_K_Gxxxxxxxxx
TRINITY_DN92233_c0_g1_m.25449	218	K	xKxxxxxxxx_K_xxxxxxxxxx
TRINITY_DN93306_c0_g1_m.26499	99	K	xxxxxxxxxx_K_Vxxxxxxxxx
TRINITY_DN92886_c0_g1_m.26068	180	K	xxxxxxxxxA_K_xxxxxxxxxx
TRINITY_DN99022_c2_g1_m.34540	329	K	xxxxxxxxxx_K_xxxxExxxxx
TRINITY_DN95079_c0_g1_m.28595	327	K	xxxxxxxxxx_K_Exxxxxxxxx
TRINITY_DN95953_c0_g1_m.29835	194	K	xxxxxxxxxx_K_Axxxxxxxxx
TRINITY_DN98242_c1_g1_m.33261	144	K	xxxxxxxxxA_K_xxxxxxxxxx
TRINITY_DN88684_c0_g1_m.22672	266	K	xxxxxxxxxV_K_xxxxxxxxxx
TRINITY_DN91011_c0_g1_m.24349	220	K	xxxxxxxxxx_K_Dxxxxxxxxx
TRINITY_DN103764_c9_g1_m.7580	72	K	xxxxxxxxxx_K_Gxxxxxxxxx
TRINITY_DN87936_c0_g1_m.22285	198	K	xxxxxxxxxY_K_xxxxxxxxxx
TRINITY_DN96287_c0_g1_m.30344	103	K	xKxxxxxxxx_K_xxxxxxxxxx
TRINITY_DN99573_c0_g2_m.35432	207	K	xxxxxxxxxx_K_Exxxxxxxxx
TRINITY_DN106508_c0_g1_m.12680	101	K	xxxxxxxxxx_K_Axxxxxxxxx
TRINITY_DN101489_c0_g1_m.2802	403	K	xKxxxxxxxx_K_xxxxxxxxxx
TRINITY_DN97250_c0_g1_m.31741	112	K	xxxxxxxxxA_K_xxxxxxxxxx
TRINITY_DN98790_c1_g1_m.34158	147	K	xxxxxxxxxx_K_Dxxxxxxxxx
TRINITY_DN80915_c0_g1_m.19802	258	K	xxxxxxxxxA_K_xxxxxxxxxx
TRINITY_DN86703_c0_g1_m.21707	1006	K	xKxxxxxxxx_K_xxxxxxxxxx
TRINITY_DN87172_c0_g1_m.21930	153	K	xxxxxxxxxx_K_xxxxExxxxx
TRINITY_DN99516_c1_g1_m.35350	254	K	xxxxxxxxxx_K_Exxxxxxxxx
TRINITY_DN101995_c0_g1_m.3740	24	K	xxxxxxxxxx_K_Dxxxxxxxxx
TRINITY_DN11192_c0_g2_m.13091	42	K	xxxxxxxxxx_K_Exxxxxxxxx
TRINITY_DN94636_c0_g1_m.28074	396	K	xxxxxxxxxx_K_Gxxxxxxxxx
TRINITY_DN105189_c5_g1_m.10750	338	K	xxxxxxxxxx_K_Exxxxxxxxx
TRINITY_DN97804_c0_g7_m.32570	6	K	xxxxxxxxxx_K_Exxxxxxxxx
TRINITY_DN88475_c0_g1_m.22566	129	K	xxxxxxxxxx_K_Exxxxxxxxx
TRINITY_DN92242_c1_g1_m.25455	318	K	xxxxxxxxxx_K_Dxxxxxxxxx
TRINITY_DN88673_c0_g1_m.22662	304	K	xxxxxxxxxA_K_xxxxxxxxxx
TRINITY_DN94862_c0_g1_m.28333	60	K	xKxxxxxxxx_K_xxxxxxxxxx
TRINITY_DN100617_c0_g1_m.1121	286	K	xKxxxxxxxx_K_xxxxxxxxxx
TRINITY_DN83544_c0_g1_m.20500	9	K	xxxxxxxxxA_K_xxxxxxxxxx
TRINITY_DN95475_c0_g1_m.29199	41	K	xKxxxxxxxx_K_xxxxxxxxxx
TRINITY_DN52351_c0_g1_m.16713	107	K	xxxxxxxxxx_K_Axxxxxxxxx
TRINITY_DN102523_c1_g1_m.4888	383	K	xxxxxxxxxx_K_xxxxExxxxx
TRINITY_DN94812_c0_g1_m.28275	128	K	xxxxxxxxxx_K_Axxxxxxxxx
TRINITY_DN90996_c0_g2_m.24338	161	K	xxxxxxxxxx_K_Axxxxxxxxx
TRINITY_DN103851_c0_g1_m.7756	177	K	xxxxxxxxxx_K_Vxxxxxxxxx
TRINITY_DN100999_c1_g1_m.1813	144	K	xxxxxxxxxV_K_xxxxxxxxxx
TRINITY_DN94784_c0_g1_m.28244	355	K	xxxxxxxxxx_K_Dxxxxxxxxx
TRINITY_DN99426_c0_g1_m.35224	128	K	xxxxxxxxxA_K_xxxxxxxxxx
TRINITY_DN94636_c0_g1_m.28074	476	K	xxxxxxxxxx_K_Dxxxxxxxxx
TRINITY_DN98958_c0_g1_m.34422	198	K	xxxxxxxxxx_K_Dxxxxxxxxx
TRINITY_DN88351_c0_g1_m.22489	167	K	xKxxxxxxxx_K_xxxxxxxxxx
TRINITY_DN102600_c0_g1_m.5048	25	K	xxxxxxxxxx_K_Exxxxxxxxx
TRINITY_DN98519_c0_g2_m.33723	237	K	xxxxxxxxxx_K_Exxxxxxxxx
TRINITY_DN99292_c0_g1_m.34995	435	K	xxxxxxxxxx_K_Dxxxxxxxxx
TRINITY_DN100617_c0_g1_m.1121	124	K	xKxxxxxxxx_K_xxxxxxxxxx
TRINITY_DN98576_c1_g1_m.33819	207	K	xxxxxxxxxx_K_Axxxxxxxxx
TRINITY_DN87916_c0_g1_m.22279	102	K	xxxxxxxxxx_K_Axxxxxxxxx
TRINITY_DN75140_c0_g1_m.18753	275	K	xxxxxxxxxx_K_Exxxxxxxxx
TRINITY_DN88612_c0_g1_m.22631	179	K	xxxxxxxxxx_K_Exxxxxxxxx
TRINITY_DN83544_c0_g1_m.20500	32	K	xxxxxxxxxV_K_xxxxxxxxxx
TRINITY_DN99793_c2_g1_m.35818	123	K	xxxxxxxxxx_K_Exxxxxxxxx
TRINITY_DN89321_c0_g1_m.23055	495	K	xxxxxxxxxx_K_Exxxxxxxxx
TRINITY_DN90640_c0_g1_m.24033	140	K	xxxxxxxxxx_K_Vxxxxxxxxx
TRINITY_DN97789_c2_g1_m.32547	891	K	xxxxxxxxxx_K_Gxxxxxxxxx
TRINITY_DN89536_c0_g1_m.23193	54	K	xxxxxxxxxx_K_Axxxxxxxxx
TRINITY_DN96964_c0_g1_m.31287	317	K	xxxxxxxxxx_K_Exxxxxxxxx
TRINITY_DN100585_c1_g1_m.1061	16	K	xxxxxxxxxA_K_xxxxxxxxxx
TRINITY_DN91364_c1_g1_m.24671	275	K	xxxxxxxxxx_K_Gxxxxxxxxx
TRINITY_DN89446_c1_g1_m.23138	103	K	xxxxxxxxxY_K_xxxxxxxxxx
TRINITY_DN100885_c2_g3_m.1615	53	K	xxxxxxxxxY_K_xxxxxxxxxx
TRINITY_DN88673_c0_g1_m.22662	90	K	xxxxxxxxxx_K_Axxxxxxxxx
TRINITY_DN90967_c0_g1_m.24323	39	K	xxxxxxxxxx_K_Vxxxxxxxxx
TRINITY_DN100955_c1_g1_m.1730	367	K	xxxxxxxxxx_K_Dxxxxxxxxx
TRINITY_DN103010_c1_g1_m.5891	173	K	xxxxxxxxxx_K_Gxxxxxxxxx
TRINITY_DN92120_c0_g1_m.25332	402	K	xxxxxxxxxx_K_Axxxxxxxxx
TRINITY_DN97560_c0_g2_m.32208	118	K	xxxxxxxxxA_K_xxxxxxxxxx
TRINITY_DN102766_c0_g2_m.5370	508	K	xxxxxxxxxx_K_Gxxxxxxxxx
TRINITY_DN98929_c0_g1_m.34378	82	K	xxxxxxxxxx_K_Gxxxxxxxxx
TRINITY_DN86380_c0_g9_m.21548	34	K	xKxxxxxxxx_K_xxxxxxxxxx
TRINITY_DN97288_c0_g1_m.31794	196	K	xKxxxxxxxx_K_xxxxxxxxxx
TRINITY_DN87616_c0_g1_m.22101	16	K	xxxxxxxxxA_K_xxxxxxxxxx
TRINITY_DN72971_c0_g1_m.18457	133	K	xxxxxxxxxV_K_xxxxxxxxxx
TRINITY_DN92302_c0_g2_m.25518	233	K	xxxxxxxxxA_K_xxxxxxxxxx
TRINITY_DN92162_c0_g1_m.25376	534	K	xxxxxxxxxx_K_xxxxExxxxx
TRINITY_DN92120_c0_g1_m.25332	418	K	xKxxxxxxxx_K_xxxxxxxxxx
TRINITY_DN79311_c0_g1_m.19445	194	K	xxxxxxxxxx_K_Dxxxxxxxxx
TRINITY_DN95225_c0_g1_m.28805	132	K	xxxxxxxxxx_K_Axxxxxxxxx
TRINITY_DN104669_c0_g1_m.9525	714	K	xxxxxxxxxV_K_xxxxxxxxxx
TRINITY_DN83851_c0_g1_m.20609	44	K	xxxxxxxxxx_K_Axxxxxxxxx
TRINITY_DN99009_c0_g1_m.34525	135	K	xxxxxxxxxx_K_Dxxxxxxxxx
TRINITY_DN100109_c0_g2_m.169	106	K	xxxxxxxxxx_K_Gxxxxxxxxx
TRINITY_DN92060_c0_g1_m.25274	143	K	xxxxxxxxxA_K_xxxxxxxxxx
TRINITY_DN99583_c0_g1_m.35454	614	K	xxxxxxxxxV_K_xxxxxxxxxx
TRINITY_DN88918_c1_g1_m.22823	175	K	xxxxxxxxxA_K_xxxxxxxxxx
TRINITY_DN93763_c1_g1_m.27049	278	K	xxxKxxxExx_K_xxxxxxxxxx
TRINITY_DN97743_c1_g1_m.32474	157	K	xxxxxxxxxx_K_Gxxxxxxxxx
TRINITY_DN101773_c0_g1_m.3352	270	K	xxxxxxxxxx_K_Exxxxxxxxx
TRINITY_DN103789_c5_g2_m.7630	291	K	xxxxxxxxxA_K_xxxxxxxxxx
TRINITY_DN90121_c0_g1_m.23620	74	K	xxxxxxxxxx_K_Exxxxxxxxx
TRINITY_DN80427_c0_g1_m.19699	63	K	xxxxxxxxxA_K_xxxxxxxxxx
TRINITY_DN31668_c0_g2_m.15793	63	K	xxxxxxxxxY_K_xxxxxxxxxx
TRINITY_DN103493_c0_g1_m.6956	181	K	xxxxxxxxxx_K_Axxxxxxxxx
TRINITY_DN100763_c0_g1_m.1391	605	K	xxxxxxxxxx_K_Dxxxxxxxxx
TRINITY_DN100046_c0_g1_m.79	778	K	xxxxxxxxxV_K_xxxxxxxxxx
TRINITY_DN104296_c0_g2_m.8684	158	K	xxxxxxxxxx_K_Exxxxxxxxx
TRINITY_DN98386_c0_g1_m.33539	829	K	xxxxxxxxxx_K_Exxxxxxxxx
TRINITY_DN99573_c0_g2_m.35432	375	K	xxxxxxxxxx_K_xxxxExxxxx
TRINITY_DN97864_c0_g1_m.32672	154	K	xxxxxxxxxx_K_Dxxxxxxxxx
TRINITY_DN97066_c1_g1_m.31437	204	K	xxxxxxxxxx_K_xxxxExxxxx
TRINITY_DN94470_c0_g1_m.27881	200	K	xxxxxxxxxx_K_Gxxxxxxxxx
TRINITY_DN84253_c0_g1_m.20747	55	K	xxxxxxxxxV_K_xxxxxxxxxx
TRINITY_DN91011_c0_g1_m.24349	184	K	xxxxxxxxxx_K_Dxxxxxxxxx
TRINITY_DN99201_c0_g1_m.34828	2	K	xxxxxxxxxx_K_Gxxxxxxxxx
TRINITY_DN96964_c0_g1_m.31287	242	K	xxxxxxxxxx_K_Axxxxxxxxx
TRINITY_DN102240_c0_g1_m.4244	438	K	xxxxxxxxxx_K_Axxxxxxxxx
TRINITY_DN94453_c1_g2_m.27864	136	K	xxxKxxxExx_K_xxxxxxxxxx
TRINITY_DN100763_c0_g1_m.1391	272	K	xKxxxxxxxx_K_xxxxxxxxxx
TRINITY_DN103851_c0_g1_m.7756	354	K	xxxKxxxExx_K_xxxxxxxxxx
TRINITY_DN99100_c0_g1_m.34657	39	K	xxxxxxxxxx_K_Vxxxxxxxxx
TRINITY_DN92499_c0_g1_m.25713	627	K	xxxxxxxxxA_K_xxxxxxxxxx
TRINITY_DN95895_c0_g2_m.29743	154	K	xKxxxxxxxx_K_xxxxxxxxxx
TRINITY_DN97480_c1_g1_m.32093	393	K	xxxxxxxxxx_K_Axxxxxxxxx
TRINITY_DN95475_c0_g1_m.29199	360	K	xxxxxxxxxx_K_Vxxxxxxxxx
TRINITY_DN76774_c0_g1_m.19000	237	K	xxxxxxxxxx_K_xxxxExxxxx
TRINITY_DN100431_c0_g1_m.747	188	K	xxxxxxxxxx_K_Vxxxxxxxxx
TRINITY_DN100270_c1_g1_m.453	55	K	xxxxxxxxxA_K_xxxxxxxxxx
TRINITY_DN104288_c5_g2_m.8671	321	K	xxxxxxxxxx_K_Exxxxxxxxx
TRINITY_DN96113_c0_g1_m.30053	393	K	xxxxxxxxxx_K_xxxxExxxxx
TRINITY_DN97288_c0_g1_m.31794	187	K	xxxxxxxxxx_K_xxxxExxxxx
TRINITY_DN105856_c0_g3_m.12150	109	K	xxxxxxxxxx_K_xxxxExxxxx
TRINITY_DN99963_c1_g2_m.36128	171	K	xxxxxxxxxx_K_Axxxxxxxxx
TRINITY_DN95827_c0_g1_m.29657	102	K	xxxxxxxxxx_K_Exxxxxxxxx
TRINITY_DN95459_c0_g1_m.29179	132	K	xxxxxxxxxx_K_Vxxxxxxxxx
TRINITY_DN89321_c0_g1_m.23055	490	K	xxxxxxxxxx_K_Vxxxxxxxxx
TRINITY_DN95272_c0_g1_m.28883	189	K	xxxxxxxxxx_K_Gxxxxxxxxx
TRINITY_DN101992_c1_g2_m.3733	135	K	xxxxxxxxxx_K_Exxxxxxxxx
TRINITY_DN98876_c1_g1_m.34294	392	K	xxxxxxxxxx_K_Axxxxxxxxx
TRINITY_DN95459_c0_g1_m.29179	52	K	xxxxxxxxxx_K_Dxxxxxxxxx
TRINITY_DN62517_c0_g1_m.17413	75	K	xxxxxxxxxY_K_xxxxxxxxxx
TRINITY_DN103270_c0_g1_m.6447	1075	K	xxxxxxxxxA_K_xxxxxxxxxx
TRINITY_DN80569_c0_g1_m.19724	178	K	xxxxxxxxxA_K_xxxxxxxxxx
TRINITY_DN87616_c0_g1_m.22101	36	K	xxxxxxxxxA_K_xxxxxxxxxx
TRINITY_DN93218_c0_g1_m.26392	253	K	xxxxxxxxxx_K_Vxxxxxxxxx
TRINITY_DN93722_c0_g1_m.26997	244	K	xxxxxxxxxx_K_Dxxxxxxxxx
TRINITY_DN75629_c0_g1_m.18812	303	K	xxxxxxxxxA_K_xxxxxxxxxx
TRINITY_DN103814_c0_g1_m.7682	70	K	xxxxxxxxxx_K_Gxxxxxxxxx
TRINITY_DN92625_c0_g1_m.25830	52	K	xxxxxxxxxx_K_Dxxxxxxxxx
TRINITY_DN98089_c1_g3_m.33032	143	K	xxxxxxxxxx_K_Axxxxxxxxx
TRINITY_DN96131_c0_g1_m.30083	160	K	xxxxxxxxxY_K_xxxxxxxxxx
TRINITY_DN92120_c0_g1_m.25332	151	K	xxxxxxxxxx_K_Gxxxxxxxxx
TRINITY_DN93236_c1_g1_m.26407	259	K	xxxxxxxxxx_K_Gxxxxxxxxx
TRINITY_DN87790_c1_g1_m.22199	87	K	xxxxxxxxxx_K_Vxxxxxxxxx
TRINITY_DN97235_c0_g2_m.31711	357	K	xxxxxxxxxY_K_xxxxxxxxxx
TRINITY_DN95399_c0_g1_m.29072	118	K	xKxxxxxxxx_K_xxxxxxxxxx
TRINITY_DN93663_c0_g1_m.26917	114	K	xxxxxxxxxx_K_Dxxxxxxxxx
TRINITY_DN71754_c0_g1_m.18297	116	K	xxxxxxxxxA_K_xxxxxxxxxx
TRINITY_DN100270_c1_g1_m.453	300	K	xxxxxxxxxA_K_xxxxxxxxxx
TRINITY_DN93171_c0_g1_m.26340	106	K	xxxxxxxxxx_K_Exxxxxxxxx
TRINITY_DN104344_c3_g4_m.8784	21	K	xKxxxxxxxx_K_xxxxxxxxxx
TRINITY_DN92499_c0_g1_m.25713	154	K	xxxxxxxxxx_K_Vxxxxxxxxx
TRINITY_DN103270_c0_g1_m.6447	921	K	xxxxxxxxxx_K_Axxxxxxxxx
TRINITY_DN83219_c0_g2_m.20398	138	K	xxxxxxxxxx_K_Vxxxxxxxxx
TRINITY_DN103095_c2_g16_m.6072	160	K	xxxxxxxxxV_K_xxxxxxxxxx
TRINITY_DN74118_c0_g1_m.18622	28	K	xxxxxxxxxY_K_xxxxxxxxxx
TRINITY_DN105288_c2_g1_m.10974	96	K	xKxxxxxxxx_K_xxxxxxxxxx
TRINITY_DN74118_c0_g1_m.18622	71	K	xxxxxxxxxx_K_Exxxxxxxxx
TRINITY_DN94662_c0_g1_m.28114	519	K	xxxxxxxxxx_K_Gxxxxxxxxx
TRINITY_DN84649_c0_g1_m.20850	90	K	xxxxxxxxxA_K_xxxxxxxxxx
TRINITY_DN100999_c1_g1_m.1813	141	K	xKxxxxxxxx_K_xxxxxxxxxx
TRINITY_DN96438_c0_g1_m.30539	686	K	xxxxxxxxxx_K_Exxxxxxxxx
TRINITY_DN102957_c0_g2_m.5778	283	K	xxxxxxxxxx_K_Exxxxxxxxx
TRINITY_DN102242_c0_g1_m.4247	290	K	xxxxxxxxxA_K_xxxxxxxxxx
TRINITY_DN97425_c0_g1_m.31997	49	K	xxxxxxxxxA_K_xxxxxxxxxx
TRINITY_DN97459_c0_g1_m.32055	698	K	xxxxxxxxxx_K_Vxxxxxxxxx
TRINITY_DN85307_c0_g1_m.21064	8	K	xxxxxxxxxV_K_xxxxxxxxxx
TRINITY_DN96106_c0_g1_m.30040	130	K	xxxxxxxxxx_K_Dxxxxxxxxx
TRINITY_DN101725_c1_g1_m.3268	356	K	xKxxxxxxxx_K_xxxxxxxxxx
TRINITY_DN89321_c0_g1_m.23055	392	K	xxxxxxxxxx_K_Dxxxxxxxxx
TRINITY_DN95369_c0_g1_m.29026	385	K	xxxxxxxxxx_K_Exxxxxxxxx
TRINITY_DN99808_c1_g1_m.35853	134	K	xxxxxxxxxx_K_Axxxxxxxxx
TRINITY_DN99476_c5_g1_m.35285	267	K	xxxxxxxxxA_K_xxxxxxxxxx
TRINITY_DN101893_c3_g2_m.3561	119	K	xxxxxxxxxA_K_xxxxxxxxxx
TRINITY_DN101629_c1_g2_m.3102	549	K	xxxxxxxxxx_K_xxxxExxxxx
TRINITY_DN98958_c0_g1_m.34422	364	K	xxxxxxxxxx_K_Dxxxxxxxxx
TRINITY_DN92170_c0_g1_m.25384	237	K	xxxxxxxxxx_K_Dxxxxxxxxx
TRINITY_DN92920_c0_g1_m.26114	154	K	xxxKxxxExx_K_xxxxxxxxxx
TRINITY_DN105856_c0_g3_m.12150	211	K	xxxxxxxxxx_K_Vxxxxxxxxx
TRINITY_DN98000_c1_g1_m.32899	140	K	xxxxxxxxxA_K_xxxxxxxxxx
TRINITY_DN78180_c0_g2_m.19215	281	K	xxxxxxxxxx_K_Axxxxxxxxx
TRINITY_DN87438_c1_g1_m.22039	149	K	xxxxxxxxxx_K_Exxxxxxxxx
TRINITY_DN104181_c4_g1_m.8446	100	K	xxxxxxxxxA_K_xxxxxxxxxx
TRINITY_DN55520_c0_g1_m.16899	70	K	xxxxxxxxxx_K_xxxxExxxxx
TRINITY_DN92920_c0_g1_m.26114	147	K	xxxxxxxxxx_K_xxxxExxxxx
TRINITY_DN94204_c0_g1_m.27551	39	K	xxxxxxxxxx_K_Dxxxxxxxxx
TRINITY_DN71863_c0_g1_m.18308	119	K	xxxxxxxxxx_K_Dxxxxxxxxx
TRINITY_DN95632_c0_g1_m.29413	463	K	xKxxxxxxxx_K_xxxxxxxxxx
TRINITY_DN100581_c0_g1_m.1039	145	K	xxxKxxxExx_K_xxxxxxxxxx
TRINITY_DN94793_c0_g1_m.28254	517	K	xxxxxxxxxx_K_Vxxxxxxxxx
TRINITY_DN99201_c0_g1_m.34828	245	K	xxxxxxxxxV_K_xxxxxxxxxx
TRINITY_DN104176_c8_g1_m.8436	43	K	xxxxxxxxxx_K_Dxxxxxxxxx
TRINITY_DN102080_c1_g1_m.3928	223	K	xxxxxxxxxx_K_Vxxxxxxxxx
TRINITY_DN95962_c0_g1_m.29847	400	K	xxxxxxxxxx_K_Axxxxxxxxx
TRINITY_DN94470_c0_g1_m.27881	172	K	xxxxxxxxxx_K_Gxxxxxxxxx
TRINITY_DN93435_c0_g2_m.26640	211	K	xxxxxxxxxA_K_xxxxxxxxxx
TRINITY_DN91975_c0_g1_m.25203	3	K	xxxxxxxxxx_K_Exxxxxxxxx
TRINITY_DN93988_c2_g1_m.27309	205	K	xxxxxxxxxx_K_Dxxxxxxxxx
TRINITY_DN92383_c0_g1_m.25588	299	K	xxxxxxxxxx_K_Exxxxxxxxx
TRINITY_DN100080_c0_g1_m.120	318	K	xxxxxxxxxA_K_xxxxxxxxxx
TRINITY_DN53129_c0_g1_m.16760	72	K	xxxxxxxxxx_K_Vxxxxxxxxx
TRINITY_DN90685_c0_g1_m.24077	52	K	xxxxxxxxxx_K_Exxxxxxxxx
TRINITY_DN101641_c0_g1_m.3119	71	K	xxxxxxxxxx_K_xxxxExxxxx
TRINITY_DN90034_c0_g1_m.23519	120	K	xxxxxxxxxx_K_Dxxxxxxxxx
TRINITY_DN102135_c0_g1_m.4034	228	K	xxxxxxxxxx_K_Dxxxxxxxxx
TRINITY_DN94812_c0_g1_m.28275	71	K	xKxxxxxxxx_K_xxxxxxxxxx
TRINITY_DN99001_c0_g1_m.34516	189	K	xxxxxxxxxx_K_Axxxxxxxxx
TRINITY_DN98402_c0_g1_m.33569	16	K	xxxxxxxxxx_K_Axxxxxxxxx
TRINITY_DN87172_c0_g1_m.21930	135	K	xxxxxxxxxV_K_xxxxxxxxxx
TRINITY_DN95870_c0_g1_m.29707	298	K	xxxxxxxxxY_K_xxxxxxxxxx
TRINITY_DN96884_c0_g1_m.31191	311	K	xxxxxxxxxx_K_Vxxxxxxxxx
TRINITY_DN96346_c5_g8_m.30421	110	K	xKxxxxxxxx_K_xxxxxxxxxx
TRINITY_DN105019_c2_g13_m.10355	67	K	xKxxxxxxxx_K_xxxxxxxxxx
TRINITY_DN79779_c0_g1_m.19551	352	K	xxxxxxxxxA_K_xxxxxxxxxx
TRINITY_DN72971_c0_g1_m.18457	196	K	xxxxxxxxxx_K_Dxxxxxxxxx
TRINITY_DN91672_c0_g2_m.24937	371	K	xKxxxxxxxx_K_xxxxxxxxxx
TRINITY_DN100642_c1_g1_m.1168	235	K	xxxxxxxxxx_K_Axxxxxxxxx
TRINITY_DN91578_c0_g1_m.24860	14	K	xxxxxxxxxx_K_Exxxxxxxxx
TRINITY_DN54985_c0_g2_m.16864	116	K	xxxxxxxxxx_K_Axxxxxxxxx
TRINITY_DN100752_c1_g1_m.1377	468	K	xxxxxxxxxx_K_Dxxxxxxxxx
TRINITY_DN98368_c0_g1_m.33510	163	K	xxxxxxxxxx_K_Gxxxxxxxxx
TRINITY_DN81995_c0_g1_m.20084	98	K	xxxxxxxxxx_K_Exxxxxxxxx
TRINITY_DN95251_c0_g1_m.28842	6	K	xxxxxxxxxA_K_xxxxxxxxxx
TRINITY_DN101011_c6_g1_m.1843	234	K	xKxxxxxxxx_K_xxxxxxxxxx
TRINITY_DN105250_c2_g3_m.10894	51	K	xxxxxxxxxx_K_Dxxxxxxxxx
TRINITY_DN94821_c9_g1_m.28292	34	K	xxxxxxxxxx_K_Dxxxxxxxxx
TRINITY_DN88475_c0_g1_m.22566	210	K	xxxxxxxxxx_K_Axxxxxxxxx
TRINITY_DN100559_c0_g4_m.987	515	K	xxxxxxxxxx_K_Exxxxxxxxx
TRINITY_DN92256_c0_g1_m.25468	273	K	xxxxxxxxxx_K_Axxxxxxxxx
TRINITY_DN96494_c0_g1_m.30626	203	K	xxxxxxxxxx_K_Axxxxxxxxx
TRINITY_DN97074_c0_g1_m.31448	221	K	xxxxxxxxxx_K_Exxxxxxxxx
TRINITY_DN97275_c0_g1_m.31778	79	K	xxxxxxxxxV_K_xxxxxxxxxx
TRINITY_DN93054_c1_g1_m.26234	63	K	xxxxxxxxxx_K_xxxxExxxxx
TRINITY_DN103307_c0_g15_m.6526	534	K	xxxxxxxxxx_K_xxxxExxxxx
TRINITY_DN96113_c0_g1_m.30053	75	K	xxxxxxxxxV_K_xxxxxxxxxx
TRINITY_DN79311_c0_g1_m.19445	188	K	xxxxxxxxxx_K_Dxxxxxxxxx
TRINITY_DN52351_c0_g1_m.16713	192	K	xKxxxxxxxx_K_xxxxxxxxxx
TRINITY_DN104929_c0_g1_m.10154	375	K	xxxxxxxxxA_K_xxxxxxxxxx
TRINITY_DN95368_c0_g1_m.29023	9	K	xxxxxxxxxV_K_xxxxxxxxxx
TRINITY_DN56510_c0_g1_m.16971	172	K	xxxxxxxxxx_K_Exxxxxxxxx
TRINITY_DN99573_c0_g2_m.35432	398	K	xxxxxxxxxx_K_Exxxxxxxxx
TRINITY_DN100699_c0_g1_m.1283	338	K	xxxxxxxxxx_K_Exxxxxxxxx
TRINITY_DN94529_c0_g1_m.27959	340	K	xxxxxxxxxA_K_xxxxxxxxxx
TRINITY_DN104679_c0_g1_m.9548	663	K	xxxxxxxxxx_K_Exxxxxxxxx
TRINITY_DN55520_c0_g1_m.16899	88	K	xxxxxxxxxx_K_Dxxxxxxxxx
TRINITY_DN99628_c0_g1_m.35530	135	K	xxxxxxxxxA_K_xxxxxxxxxx
TRINITY_DN89321_c0_g1_m.23055	379	K	xxxxxxxxxx_K_Exxxxxxxxx
TRINITY_DN98718_c0_g1_m.34036	205	K	xKxxxxxxxx_K_xxxxxxxxxx
TRINITY_DN89193_c0_g1_m.22963	78	K	xxxxxxxxxx_K_Gxxxxxxxxx
TRINITY_DN96494_c0_g1_m.30626	219	K	xKxxxxxxxx_K_xxxxxxxxxx
TRINITY_DN92242_c1_g1_m.25455	351	K	xxxxxxxxxx_K_Exxxxxxxxx
TRINITY_DN95459_c0_g1_m.29179	37	K	xKxxxxxxxx_K_xxxxxxxxxx
TRINITY_DN90863_c0_g1_m.24230	106	K	xxxxxxxxxx_K_Axxxxxxxxx
TRINITY_DN99946_c0_g1_m.36092	234	K	xxxxxxxxxA_K_xxxxxxxxxx
TRINITY_DN93605_c0_g1_m.26848	82	K	xxxxxxxxxV_K_xxxxxxxxxx
TRINITY_DN88487_c0_g1_m.22575	312	K	xxxxxxxxxA_K_xxxxxxxxxx
TRINITY_DN104929_c0_g1_m.10154	51	K	xKxxxxxxxx_K_xxxxxxxxxx
TRINITY_DN89071_c0_g1_m.22902	206	K	xxxxxxxxxV_K_xxxxxxxxxx
TRINITY_DN100512_c0_g12_m.890	90	K	xxxxxxxxxx_K_Exxxxxxxxx
TRINITY_DN94790_c0_g1_m.28249	185	K	xxxxxxxxxx_K_xxxxExxxxx
TRINITY_DN102605_c0_g3_m.5060	587	K	xxxxxxxxxV_K_xxxxxxxxxx
TRINITY_DN95507_c1_g1_m.29232	635	K	xxxxxxxxxA_K_xxxxxxxxxx
TRINITY_DN105288_c2_g1_m.10974	202	K	xxxxxxxxxx_K_xxxxExxxxx
TRINITY_DN85598_c0_g2_m.21173	89	K	xxxxxxxxxx_K_Exxxxxxxxx
TRINITY_DN99650_c0_g1_m.35583	161	K	xxxxxxxxxx_K_Exxxxxxxxx
TRINITY_DN103239_c0_g1_m.6403	328	K	xxxxxxxxxA_K_xxxxxxxxxx
TRINITY_DN104654_c1_g1_m.9481	251	K	xxxxxxxxxx_K_Axxxxxxxxx
TRINITY_DN97789_c2_g1_m.32547	735	K	xxxxxxxxxx_K_Dxxxxxxxxx
TRINITY_DN63600_c0_g1_m.17517	467	K	xxxxxxxxxx_K_Exxxxxxxxx
TRINITY_DN98386_c0_g1_m.33539	147	K	xxxxxxxxxx_K_Dxxxxxxxxx
TRINITY_DN102018_c0_g1_m.3783	188	K	xKxxxxxxxx_K_xxxxxxxxxx
TRINITY_DN104949_c0_g1_m.10211	874	K	xxxxxxxxxx_K_Exxxxxxxxx
TRINITY_DN101077_c2_g1_m.1974	126	K	xxxKxxxExx_K_xxxxxxxxxx
TRINITY_DN101011_c6_g1_m.1843	79	K	xxxxxxxxxx_K_Vxxxxxxxxx
TRINITY_DN93790_c1_g1_m.27085	344	K	xxxxxxxxxA_K_xxxxxxxxxx
TRINITY_DN104937_c3_g1_m.10182	449	K	xxxxxxxxxx_K_Exxxxxxxxx
TRINITY_DN92162_c0_g1_m.25376	107	K	xxxxxxxxxx_K_xxxxExxxxx
TRINITY_DN92006_c0_g1_m.25220	174	K	xxxxxxxxxx_K_Gxxxxxxxxx
TRINITY_DN99215_c2_g1_m.34853	136	K	xxxxxxxxxx_K_Vxxxxxxxxx
TRINITY_DN97922_c1_g1_m.32767	191	K	xxxxxxxxxx_K_Exxxxxxxxx
TRINITY_DN104272_c6_g2_m.8627	453	K	xxxxxxxxxA_K_xxxxxxxxxx
TRINITY_DN101773_c0_g1_m.3352	451	K	xxxxxxxxxx_K_Exxxxxxxxx
TRINITY_DN86584_c0_g1_m.21646	279	K	xxxxxxxxxx_K_Axxxxxxxxx
TRINITY_DN104293_c0_g1_m.8678	91	K	xxxxxxxxxx_K_Vxxxxxxxxx
TRINITY_DN100585_c1_g1_m.1061	101	K	xxxKxxxExx_K_xxxxxxxxxx
TRINITY_DN94807_c0_g2_m.28273	368	K	xxxxxxxxxx_K_Gxxxxxxxxx
TRINITY_DN71863_c0_g1_m.18308	43	K	xxxKxxxExx_K_xxxxxxxxxx
TRINITY_DN99526_c1_g1_m.35368	290	K	xxxxxxxxxA_K_xxxxxxxxxx
TRINITY_DN69851_c0_g3_m.18089	14	K	xxxxxxxxxA_K_xxxxxxxxxx
TRINITY_DN95456_c0_g1_m.29175	110	K	xxxxxxxxxV_K_xxxxxxxxxx
TRINITY_DN103538_c1_g1_m.7071	77	K	xxxxxxxxxx_K_Exxxxxxxxx
TRINITY_DN99516_c1_g1_m.35350	588	K	xxxxxxxxxx_K_Axxxxxxxxx
TRINITY_DN100431_c0_g1_m.747	199	K	xxxxxxxxxA_K_xxxxxxxxxx
TRINITY_DN104669_c0_g1_m.9525	432	K	xxxxxxxxxx_K_Gxxxxxxxxx
TRINITY_DN94475_c0_g1_m.27888	131	K	xxxxxxxxxx_K_Gxxxxxxxxx
TRINITY_DN92615_c0_g3_m.25814	11	K	xxxxxxxxxx_K_Exxxxxxxxx
TRINITY_DN87114_c0_g1_m.21904	88	K	xxxKxxxExx_K_xxxxxxxxxx
TRINITY_DN51048_c0_g1_m.16604	342	K	xxxxxxxxxx_K_Gxxxxxxxxx
TRINITY_DN99793_c2_g1_m.35818	638	K	xxxxxxxxxx_K_xxxxExxxxx
TRINITY_DN90760_c1_g1_m.24134	204	K	xxxxxxxxxV_K_xxxxxxxxxx
TRINITY_DN95308_c0_g1_m.28928	208	K	xxxxxxxxxx_K_Dxxxxxxxxx
TRINITY_DN92162_c0_g1_m.25376	922	K	xxxxxxxxxA_K_xxxxxxxxxx
TRINITY_DN98215_c3_g14_m.33205	101	K	xxxxxxxxxx_K_Axxxxxxxxx
TRINITY_DN101541_c4_g1_m.2910	272	K	xxxxxxxxxY_K_xxxxxxxxxx
TRINITY_DN103563_c1_g3_m.7122	491	K	xxxxxxxxxx_K_xxxxExxxxx
TRINITY_DN84369_c0_g1_m.20773	282	K	xxxxxxxxxV_K_xxxxxxxxxx
TRINITY_DN86513_c0_g1_m.21621	229	K	xxxxxxxxxx_K_Gxxxxxxxxx
TRINITY_DN98386_c0_g1_m.33539	101	K	xxxxxxxxxx_K_Vxxxxxxxxx
TRINITY_DN99722_c5_g1_m.35696	382	K	xKxxxxxxxx_K_xxxxxxxxxx
TRINITY_DN101499_c1_g1_m.2832	54	K	xxxxxxxxxx_K_Dxxxxxxxxx
TRINITY_DN97066_c1_g1_m.31437	356	K	xxxKxxxExx_K_xxxxxxxxxx
TRINITY_DN90546_c1_g1_m.23968	325	K	xxxxxxxxxx_K_xxxxExxxxx
TRINITY_DN91569_c0_g1_m.24849	101	K	xxxxxxxxxx_K_Vxxxxxxxxx
TRINITY_DN97289_c0_g1_m.31796	213	K	xxxxxxxxxx_K_Vxxxxxxxxx
TRINITY_DN88405_c0_g1_m.22523	95	K	xxxxxxxxxx_K_Vxxxxxxxxx
TRINITY_DN103728_c4_g1_m.7477	249	K	xxxxxxxxxx_K_Vxxxxxxxxx
TRINITY_DN89199_c0_g1_m.22968	242	K	xxxKxxxExx_K_xxxxxxxxxx
TRINITY_DN79311_c0_g1_m.19445	79	K	xxxxxxxxxx_K_Exxxxxxxxx
TRINITY_DN88684_c0_g1_m.22672	627	K	xxxxxxxxxA_K_xxxxxxxxxx
TRINITY_DN91404_c0_g1_m.24700	227	K	xxxxxxxxxx_K_Gxxxxxxxxx
TRINITY_DN98480_c0_g1_m.33680	142	K	xxxxxxxxxx_K_Gxxxxxxxxx
TRINITY_DN99674_c2_g1_m.35629	414	K	xxxxxxxxxx_K_xxxxExxxxx
TRINITY_DN105462_c1_g2_m.11380	148	K	xxxxxxxxxV_K_xxxxxxxxxx
TRINITY_DN93986_c0_g1_m.27300	486	K	xxxxxxxxxx_K_Exxxxxxxxx
TRINITY_DN83548_c0_g1_m.20503	83	K	xKxxxxxxxx_K_xxxxxxxxxx
TRINITY_DN88750_c0_g1_m.22715	137	K	xxxxxxxxxV_K_xxxxxxxxxx
TRINITY_DN90210_c0_g1_m.23704	53	K	xxxxxxxxxx_K_Vxxxxxxxxx
TRINITY_DN97497_c0_g1_m.32113	240	K	xxxxxxxxxA_K_xxxxxxxxxx
TRINITY_DN99600_c0_g1_m.35483	141	K	xxxxxxxxxx_K_Vxxxxxxxxx
TRINITY_DN86513_c0_g1_m.21621	174	K	xxxxxxxxxx_K_Exxxxxxxxx
TRINITY_DN96491_c0_g1_m.30622	389	K	xxxxxxxxxV_K_xxxxxxxxxx
TRINITY_DN101407_c0_g1_m.2619	53	K	xxxxxxxxxx_K_Axxxxxxxxx
TRINITY_DN100838_c7_g2_m.1523	580	K	xxxxxxxxxx_K_xxxxExxxxx
TRINITY_DN104929_c0_g1_m.10154	376	K	xxxxxxxxxx_K_Dxxxxxxxxx
TRINITY_DN94636_c0_g1_m.28074	405	K	xKxxxxxxxx_K_xxxxxxxxxx
TRINITY_DN102018_c0_g1_m.3783	714	K	xxxxxxxxxx_K_Vxxxxxxxxx
TRINITY_DN91672_c0_g2_m.24937	38	K	xxxxxxxxxx_K_xxxxExxxxx
TRINITY_DN93988_c2_g1_m.27309	311	K	xxxxxxxxxV_K_xxxxxxxxxx
TRINITY_DN100585_c1_g1_m.1061	36	K	xxxxxxxxxx_K_Axxxxxxxxx
TRINITY_DN97789_c2_g1_m.32547	906	K	xKxxxxxxxx_K_xxxxxxxxxx
TRINITY_DN97813_c0_g1_m.32590	323	K	xxxxxxxxxx_K_Exxxxxxxxx
TRINITY_DN101443_c1_g2_m.2706	138	K	xxxKxxxExx_K_xxxxxxxxxx
TRINITY_DN100838_c7_g2_m.1523	354	K	xxxxxxxxxx_K_Exxxxxxxxx
TRINITY_DN95396_c1_g1_m.29067	303	K	xxxxxxxxxx_K_Exxxxxxxxx
TRINITY_DN88609_c0_g1_m.22630	41	K	xxxxxxxxxA_K_xxxxxxxxxx
TRINITY_DN95507_c1_g1_m.29232	362	K	xxxxxxxxxx_K_xxxxExxxxx
TRINITY_DN93086_c0_g2_m.26254	67	K	xxxxxxxxxx_K_Dxxxxxxxxx
TRINITY_DN98473_c0_g2_m.33674	257	K	xxxxxxxxxx_K_Exxxxxxxxx
TRINITY_DN91181_c0_g1_m.24482	143	K	xxxxxxxxxx_K_Vxxxxxxxxx
TRINITY_DN90967_c0_g1_m.24323	90	K	xxxxxxxxxx_K_Gxxxxxxxxx
TRINITY_DN87916_c0_g1_m.22279	152	K	xxxxxxxxxx_K_Exxxxxxxxx
TRINITY_DN96222_c0_g1_m.30232	267	K	xxxxxxxxxx_K_Exxxxxxxxx
TRINITY_DN98876_c1_g1_m.34294	224	K	xxxxxxxxxx_K_Gxxxxxxxxx
TRINITY_DN88736_c0_g1_m.22706	369	K	xxxxxxxxxx_K_Dxxxxxxxxx
TRINITY_DN99583_c0_g1_m.35454	742	K	xxxxxxxxxx_K_Axxxxxxxxx
TRINITY_DN97521_c0_g3_m.32153	122	K	xxxxxxxxxx_K_Vxxxxxxxxx
TRINITY_DN95913_c0_g6_m.29779	38	K	xxxxxxxxxx_K_Axxxxxxxxx
TRINITY_DN99964_c0_g1_m.36129	220	K	xxxxxxxxxx_K_Dxxxxxxxxx
TRINITY_DN99755_c0_g1_m.35750	188	K	xxxxxxxxxA_K_xxxxxxxxxx
TRINITY_DN64209_c0_g2_m.17565	135	K	xxxxxxxxxx_K_Exxxxxxxxx
TRINITY_DN72971_c0_g1_m.18457	162	K	xxxxxxxxxx_K_Exxxxxxxxx
TRINITY_DN99471_c1_g1_m.35279	339	K	xxxxxxxxxV_K_xxxxxxxxxx
TRINITY_DN98314_c0_g2_m.33420	82	K	xxxxxxxxxx_K_xxxxExxxxx
TRINITY_DN94593_c2_g2_m.28017	9	K	xxxxxxxxxx_K_Exxxxxxxxx
TRINITY_DN849_c0_g1_m.20945	122	K	xxxxxxxxxx_K_Gxxxxxxxxx
TRINITY_DN88811_c0_g1_m.22750	263	K	xxxxxxxxxx_K_Exxxxxxxxx
TRINITY_DN95671_c6_g1_m.29456	361	K	xxxxxxxxxA_K_xxxxxxxxxx
TRINITY_DN87862_c0_g1_m.22242	62	K	xKxxxxxxxx_K_xxxxxxxxxx
TRINITY_DN92289_c0_g1_m.25498	688	K	xxxxxxxxxA_K_xxxxxxxxxx
TRINITY_DN92006_c0_g1_m.25220	120	K	xxxKxxxExx_K_xxxxxxxxxx
TRINITY_DN67778_c0_g1_m.17831	59	K	xxxxxxxxxx_K_Dxxxxxxxxx
TRINITY_DN101579_c2_g1_m.2976	145	K	xxxxxxxxxA_K_xxxxxxxxxx
TRINITY_DN80769_c0_g1_m.19767	28	K	xKxxxxxxxx_K_xxxxxxxxxx
TRINITY_DN96823_c0_g1_m.31121	353	K	xxxxxxxxxx_K_Gxxxxxxxxx
TRINITY_DN92782_c0_g1_m.25965	263	K	xxxxxxxxxx_K_Vxxxxxxxxx
TRINITY_DN94793_c0_g1_m.28254	319	K	xxxxxxxxxx_K_Vxxxxxxxxx
TRINITY_DN84330_c0_g1_m.20763	65	K	xKxxxxxxxx_K_xxxxxxxxxx
TRINITY_DN92006_c0_g1_m.25220	190	K	xxxxxxxxxx_K_Vxxxxxxxxx
TRINITY_DN101579_c2_g1_m.2976	264	K	xKxxxxxxxx_K_xxxxxxxxxx
TRINITY_DN100471_c1_g1_m.808	121	K	xxxxxxxxxx_K_Exxxxxxxxx
TRINITY_DN90024_c1_g3_m.23512	461	K	xxxxxxxxxx_K_xxxxExxxxx
TRINITY_DN104076_c0_g3_m.8233	41	K	xxxxxxxxxY_K_xxxxxxxxxx
TRINITY_DN91578_c1_g1_m.24862	87	K	xxxxxxxxxx_K_Exxxxxxxxx
TRINITY_DN96724_c0_g1_m.30959	622	K	xxxxxxxxxx_K_Gxxxxxxxxx
TRINITY_DN95012_c0_g1_m.28504	267	K	xxxxxxxxxA_K_xxxxxxxxxx
TRINITY_DN100617_c0_g1_m.1121	360	K	xxxxxxxxxx_K_Axxxxxxxxx
TRINITY_DN94449_c2_g1_m.27862	368	K	xKxxxxxxxx_K_xxxxxxxxxx
TRINITY_DN104949_c0_g1_m.10211	243	K	xxxxxxxxxx_K_Exxxxxxxxx
TRINITY_DN89321_c0_g1_m.23055	376	K	xxxxxxxxxx_K_Axxxxxxxxx
TRINITY_DN102987_c1_g1_m.5842	530	K	xxxxxxxxxx_K_Exxxxxxxxx
TRINITY_DN99241_c0_g1_m.34895	113	K	xxxxxxxxxx_K_Exxxxxxxxx
TRINITY_DN81026_c0_g4_m.19833	18	K	xxxxxxxxxx_K_Axxxxxxxxx
TRINITY_DN100999_c1_g1_m.1813	163	K	xxxxxxxxxx_K_Dxxxxxxxxx
TRINITY_DN103304_c0_g2_m.6519	144	K	xxxxxxxxxx_K_Vxxxxxxxxx
TRINITY_DN80778_c0_g1_m.19768	286	K	xxxKxxxExx_K_xxxxxxxxxx
TRINITY_DN63741_c0_g1_m.17529	190	K	xxxxxxxxxA_K_xxxxxxxxxx
TRINITY_DN91011_c0_g1_m.24349	340	K	xxxxxxxxxx_K_Axxxxxxxxx
TRINITY_DN105430_c5_g1_m.11282	347	K	xxxxxxxxxx_K_Gxxxxxxxxx
TRINITY_DN88730_c0_g1_m.22704	138	K	xxxxxxxxxx_K_Dxxxxxxxxx
TRINITY_DN104669_c0_g1_m.9525	781	K	xxxxxxxxxA_K_xxxxxxxxxx
TRINITY_DN98368_c0_g1_m.33510	458	K	xxxKxxxExx_K_xxxxxxxxxx
TRINITY_DN88462_c0_g1_m.22559	271	K	xxxxxxxxxx_K_Exxxxxxxxx
TRINITY_DN91287_c0_g1_m.24587	536	K	xxxxxxxxxx_K_Axxxxxxxxx
TRINITY_DN101426_c1_g1_m.2666	168	K	xxxxxxxxxA_K_xxxxxxxxxx
TRINITY_DN105607_c0_g7_m.11659	587	K	xxxxxxxxxx_K_Exxxxxxxxx
TRINITY_DN101271_c0_g2_m.2366	224	K	xxxxxxxxxx_K_Exxxxxxxxx
TRINITY_DN51048_c0_g1_m.16604	380	K	xxxxxxxxxA_K_xxxxxxxxxx
TRINITY_DN99003_c1_g1_m.34518	86	K	xxxxxxxxxx_K_Exxxxxxxxx
TRINITY_DN99573_c0_g2_m.35432	99	K	xxxxxxxxxx_K_Dxxxxxxxxx
TRINITY_DN90945_c0_g1_m.24299	105	K	xxxKxxxExx_K_xxxxxxxxxx
TRINITY_DN96353_c0_g1_m.30429	164	K	xxxxxxxxxx_K_Axxxxxxxxx
TRINITY_DN89082_c0_g1_m.22905	42	K	xxxxxxxxxV_K_xxxxxxxxxx
TRINITY_DN97745_c0_g1_m.32480	502	K	xxxxxxxxxx_K_Axxxxxxxxx
TRINITY_DN90142_c0_g1_m.23637	438	K	xxxxxxxxxx_K_Vxxxxxxxxx
TRINITY_DN92162_c0_g1_m.25376	636	K	xxxxxxxxxx_K_xxxxExxxxx
TRINITY_DN95671_c6_g1_m.29456	394	K	xxxxxxxxxV_K_xxxxxxxxxx
TRINITY_DN89948_c0_g1_m.23460	415	K	xxxxxxxxxx_K_Exxxxxxxxx
TRINITY_DN100541_c0_g1_m.953	694	K	xxxxxxxxxx_K_Exxxxxxxxx
TRINITY_DN96113_c0_g1_m.30053	48	K	xxxxxxxxxx_K_Gxxxxxxxxx
TRINITY_DN99100_c0_g1_m.34657	324	K	xxxxxxxxxx_K_Axxxxxxxxx
TRINITY_DN98958_c0_g1_m.34422	395	K	xxxKxxxExx_K_xxxxxxxxxx
TRINITY_DN83210_c0_g1_m.20393	175	K	xxxxxxxxxx_K_Exxxxxxxxx
TRINITY_DN87780_c0_g1_m.22194	81	K	xxxxxxxxxx_K_Dxxxxxxxxx
TRINITY_DN83653_c0_g1_m.20532	177	K	xxxxxxxxxx_K_xxxxExxxxx
TRINITY_DN93402_c0_g1_m.26596	163	K	xxxxxxxxxV_K_xxxxxxxxxx
TRINITY_DN91487_c0_g1_m.24772	275	K	xxxxxxxxxx_K_Exxxxxxxxx
TRINITY_DN98592_c1_g2_m.33846	90	K	xxxxxxxxxx_K_Axxxxxxxxx
TRINITY_DN87321_c0_g3_m.21991	113	K	xxxxxxxxxx_K_xxxxExxxxx
TRINITY_DN102942_c0_g1_m.5737	330	K	xxxxxxxxxx_K_Vxxxxxxxxx
TRINITY_DN90685_c0_g1_m.24077	73	K	xxxxxxxxxx_K_Vxxxxxxxxx
TRINITY_DN91487_c0_g1_m.24772	495	K	xxxxxxxxxx_K_Gxxxxxxxxx
TRINITY_DN92913_c0_g1_m.26106	164	K	xxxxxxxxxx_K_Axxxxxxxxx
TRINITY_DN91569_c0_g1_m.24849	253	K	xxxxxxxxxx_K_Vxxxxxxxxx
TRINITY_DN90967_c0_g1_m.24323	78	K	xxxxxxxxxx_K_Gxxxxxxxxx
TRINITY_DN90967_c0_g1_m.24323	123	K	xxxxxxxxxA_K_xxxxxxxxxx
TRINITY_DN100208_c0_g1_m.344	392	K	xxxxxxxxxx_K_Gxxxxxxxxx
TRINITY_DN88727_c0_g1_m.22702	137	K	xxxxxxxxxx_K_Exxxxxxxxx
TRINITY_DN99793_c2_g1_m.35818	183	K	xxxxxxxxxx_K_Dxxxxxxxxx
TRINITY_DN96498_c0_g1_m.30632	205	K	xxxxxxxxxA_K_xxxxxxxxxx
TRINITY_DN96498_c0_g1_m.30632	93	K	xxxxxxxxxA_K_xxxxxxxxxx
TRINITY_DN94821_c9_g1_m.28292	173	K	xxxxxxxxxx_K_Dxxxxxxxxx
TRINITY_DN98386_c0_g1_m.33539	98	K	xxxxxxxxxx_K_Axxxxxxxxx
TRINITY_DN99674_c0_g1_m.35626	112	K	xxxxxxxxxx_K_Gxxxxxxxxx
TRINITY_DN92499_c0_g1_m.25713	621	K	xxxxxxxxxx_K_Exxxxxxxxx
TRINITY_DN105158_c25_g1_m.10689	65	K	xxxxxxxxxx_K_Vxxxxxxxxx
TRINITY_DN101419_c5_g1_m.2655	14	K	xxxxxxxxxx_K_Dxxxxxxxxx
TRINITY_DN86719_c0_g1_m.21713	19	K	xxxxxxxxxx_K_Exxxxxxxxx
TRINITY_DN87869_c0_g1_m.22244	34	K	xxxxxxxxxx_K_Dxxxxxxxxx
TRINITY_DN86234_c0_g1_m.21482	8	K	xxxxxxxxxV_K_xxxxxxxxxx
TRINITY_DN95043_c2_g1_m.28543	71	K	xxxxxxxxxx_K_Exxxxxxxxx
TRINITY_DN100512_c0_g12_m.890	12	K	xxxxxxxxxx_K_Axxxxxxxxx
TRINITY_DN86137_c0_g1_m.21438	103	K	xxxxxxxxxx_K_Exxxxxxxxx
TRINITY_DN94319_c0_g1_m.27678	247	K	xxxxxxxxxV_K_xxxxxxxxxx
TRINITY_DN93867_c0_g1_m.27171	308	K	xxxxxxxxxA_K_xxxxxxxxxx
TRINITY_DN88931_c0_g1_m.22835	278	K	xxxxxxxxxY_K_xxxxxxxxxx
TRINITY_DN96957_c1_g2_m.31276	126	K	xxxxxxxxxx_K_Vxxxxxxxxx
TRINITY_DN104929_c0_g1_m.10154	140	K	xxxxxxxxxV_K_xxxxxxxxxx
TRINITY_DN98226_c0_g1_m.33223	136	K	xxxxxxxxxx_K_Gxxxxxxxxx
TRINITY_DN104128_c1_g1_m.8348	112	K	xxxxxxxxxV_K_xxxxxxxxxx
TRINITY_DN55938_c0_g1_m.16938	143	K	xxxxxxxxxx_K_Vxxxxxxxxx
TRINITY_DN86026_c0_g1_m.21361	102	K	xxxxxxxxxx_K_Exxxxxxxxx
TRINITY_DN91364_c1_g1_m.24671	59	K	xKxxxxxxxx_K_xxxxxxxxxx
TRINITY_DN104929_c0_g1_m.10154	138	K	xxxxxxxxxx_K_Vxxxxxxxxx
TRINITY_DN100838_c7_g2_m.1523	575	K	xxxxxxxxxx_K_Exxxxxxxxx
TRINITY_DN97723_c3_g1_m.32443	5	K	xxxxxxxxxY_K_xxxxxxxxxx
TRINITY_DN72971_c0_g1_m.18457	130	K	xxxxxxxxxx_K_Exxxxxxxxx
TRINITY_DN95225_c0_g1_m.28805	171	K	xxxxxxxxxx_K_Dxxxxxxxxx
TRINITY_DN91487_c0_g1_m.24772	480	K	xxxxxxxxxx_K_Axxxxxxxxx
TRINITY_DN92548_c0_g1_m.25758	109	K	xxxxxxxxxx_K_Axxxxxxxxx
TRINITY_DN95601_c0_g1_m.29369	57	K	xxxxxxxxxA_K_xxxxxxxxxx
TRINITY_DN97894_c0_g1_m.32714	99	K	xxxxxxxxxx_K_Exxxxxxxxx
TRINITY_DN93026_c1_g1_m.26210	142	K	xxxxxxxxxx_K_Dxxxxxxxxx
TRINITY_DN93354_c0_g1_m.26546	215	K	xxxxxxxxxx_K_xxxxExxxxx
TRINITY_DN75897_c0_g2_m.18871	281	K	xxxxxxxxxx_K_Exxxxxxxxx
TRINITY_DN92536_c0_g1_m.25743	82	K	xKxxxxxxxx_K_xxxxxxxxxx
TRINITY_DN99793_c2_g1_m.35818	604	K	xxxxxxxxxx_K_xxxxExxxxx
TRINITY_DN105095_c0_g1_m.10527	121	K	xxxxxxxxxx_K_Vxxxxxxxxx
TRINITY_DN104293_c0_g1_m.8678	685	K	xxxxxxxxxx_K_xxxxExxxxx
TRINITY_DN97057_c0_g1_m.31419	416	K	xxxxxxxxxx_K_Vxxxxxxxxx
TRINITY_DN97894_c0_g1_m.32714	416	K	xxxxxxxxxx_K_Axxxxxxxxx
TRINITY_DN92162_c0_g1_m.25376	239	K	xxxxxxxxxx_K_xxxxExxxxx
TRINITY_DN100616_c1_g1_m.1117	49	K	xxxxxxxxxx_K_Dxxxxxxxxx
TRINITY_DN88918_c2_g1_m.22825	75	K	xxxxxxxxxx_K_Vxxxxxxxxx
TRINITY_DN92162_c0_g1_m.25376	610	K	xxxxxxxxxx_K_xxxxExxxxx
TRINITY_DN78658_c0_g1_m.19296	138	K	xxxxxxxxxx_K_Exxxxxxxxx
TRINITY_DN91818_c0_g2_m.25054	84	K	xxxxxxxxxx_K_Dxxxxxxxxx
TRINITY_DN79311_c0_g1_m.19445	186	K	xxxxxxxxxx_K_Vxxxxxxxxx
TRINITY_DN104654_c1_g1_m.9481	262	K	xxxxxxxxxx_K_Vxxxxxxxxx
TRINITY_DN98089_c1_g3_m.33032	174	K	xxxxxxxxxx_K_xxxxExxxxx
TRINITY_DN95573_c0_g1_m.29325	77	K	xxxxxxxxxx_K_Gxxxxxxxxx
TRINITY_DN95878_c5_g2_m.29719	277	K	xxxxxxxxxx_K_Dxxxxxxxxx
TRINITY_DN94577_c0_g1_m.27995	3	K	xxxxxxxxxA_K_xxxxxxxxxx
TRINITY_DN77903_c0_g2_m.19165	128	K	xxxxxxxxxx_K_xxxxExxxxx
TRINITY_DN93054_c1_g1_m.26234	173	K	xxxxxxxxxA_K_xxxxxxxxxx
TRINITY_DN101579_c2_g1_m.2976	86	K	xxxxxxxxxx_K_Axxxxxxxxx
TRINITY_DN88702_c0_g1_m.22681	185	K	xxxxxxxxxA_K_xxxxxxxxxx
TRINITY_DN88657_c0_g1_m.22651	83	K	xKxxxxxxxx_K_xxxxxxxxxx
TRINITY_DN95663_c1_g1_m.29446	78	K	xxxxxxxxxx_K_Axxxxxxxxx
TRINITY_DN96106_c0_g1_m.30040	460	K	xxxxxxxxxx_K_Axxxxxxxxx
TRINITY_DN93776_c0_g1_m.27066	63	K	xxxxxxxxxx_K_xxxxExxxxx
TRINITY_DN99087_c5_g1_m.34634	755	K	xxxxxxxxxx_K_Axxxxxxxxx
TRINITY_DN87897_c0_g1_m.22265	39	K	xxxxxxxxxx_K_xxxxExxxxx
TRINITY_DN99381_c0_g1_m.35150	92	K	xxxxxxxxxx_K_Exxxxxxxxx
TRINITY_DN94529_c0_g1_m.27959	65	K	xxxxxxxxxx_K_Axxxxxxxxx
TRINITY_DN98282_c0_g1_m.33347	308	K	xxxxxxxxxx_K_Axxxxxxxxx
TRINITY_DN96508_c1_g1_m.30646	412	K	xKxxxxxxxx_K_xxxxxxxxxx
TRINITY_DN94182_c2_g1_m.27513	78	K	xxxxxxxxxx_K_Vxxxxxxxxx
TRINITY_DN104929_c0_g1_m.10154	256	K	xxxxxxxxxA_K_xxxxxxxxxx
TRINITY_DN102260_c1_g1_m.4277	332	K	xKxxxxxxxx_K_xxxxxxxxxx
TRINITY_DN96287_c0_g1_m.30344	94	K	xxxxxxxxxx_K_Exxxxxxxxx
TRINITY_DN99793_c2_g1_m.35818	399	K	xxxxxxxxxx_K_Exxxxxxxxx
TRINITY_DN91364_c1_g1_m.24671	166	K	xxxxxxxxxA_K_xxxxxxxxxx
TRINITY_DN100752_c1_g1_m.1377	439	K	xxxxxxxxxA_K_xxxxxxxxxx
TRINITY_DN90967_c0_g1_m.24323	34	K	xxxxxxxxxx_K_Exxxxxxxxx
TRINITY_DN97804_c0_g9_m.32572	64	K	xxxxxxxxxx_K_xxxxExxxxx
TRINITY_DN90400_c0_g1_m.23859	186	K	xxxxxxxxxx_K_Dxxxxxxxxx
TRINITY_DN98013_c0_g1_m.32917	335	K	xxxxxxxxxx_K_Gxxxxxxxxx
TRINITY_DN100380_c1_g1_m.653	70	K	xxxxxxxxxx_K_Exxxxxxxxx
TRINITY_DN97459_c0_g1_m.32055	685	K	xxxxxxxxxV_K_xxxxxxxxxx
TRINITY_DN94238_c0_g1_m.27588	125	K	xxxxxxxxxV_K_xxxxxxxxxx
TRINITY_DN102585_c2_g1_m.5022	615	K	xxxxxxxxxA_K_xxxxxxxxxx
TRINITY_DN89286_c0_g1_m.23026	134	K	xxxxxxxxxA_K_xxxxxxxxxx
TRINITY_DN97922_c1_g1_m.32767	247	K	xxxxxxxxxA_K_xxxxxxxxxx
TRINITY_DN64052_c1_g1_m.17549	142	K	xxxxxxxxxx_K_Vxxxxxxxxx
TRINITY_DN85307_c0_g1_m.21064	16	K	xxxxxxxxxx_K_Exxxxxxxxx
TRINITY_DN102742_c0_g1_m.5316	107	K	xxxxxxxxxx_K_Exxxxxxxxx
TRINITY_DN92935_c1_g1_m.26127	102	K	xxxxxxxxxY_K_xxxxxxxxxx
TRINITY_DN103764_c9_g1_m.7580	114	K	xxxxxxxxxx_K_Exxxxxxxxx
TRINITY_DN81844_c0_g1_m.20039	55	K	xxxxxxxxxx_K_Exxxxxxxxx
TRINITY_DN88739_c0_g1_m.22711	244	K	xKxxxxxxxx_K_xxxxxxxxxx
TRINITY_DN97854_c0_g2_m.32654	130	K	xxxxxxxxxx_K_Dxxxxxxxxx
TRINITY_DN94951_c0_g1_m.28431	54	K	xxxxxxxxxx_K_Gxxxxxxxxx
TRINITY_DN83574_c0_g1_m.20510	186	K	xxxxxxxxxx_K_Gxxxxxxxxx
TRINITY_DN94470_c0_g1_m.27881	169	K	xxxxxxxxxx_K_Axxxxxxxxx
TRINITY_DN98282_c0_g1_m.33347	263	K	xxxxxxxxxx_K_Dxxxxxxxxx
TRINITY_DN100999_c1_g1_m.1813	112	K	xxxxxxxxxx_K_Gxxxxxxxxx
TRINITY_DN88318_c0_g1_m.22470	47	K	xxxxxxxxxA_K_xxxxxxxxxx
TRINITY_DN88612_c0_g1_m.22631	188	K	xKxxxxxxxx_K_xxxxxxxxxx
TRINITY_DN82781_c0_g1_m.20269	336	K	xxxxxxxxxx_K_xxxxExxxxx
TRINITY_DN92064_c2_g1_m.25276	67	K	xxxxxxxxxY_K_xxxxxxxxxx
TRINITY_DN95223_c0_g1_m.28801	568	K	xxxxxxxxxx_K_Dxxxxxxxxx
TRINITY_DN96023_c0_g1_m.29948	434	K	xxxxxxxxxV_K_xxxxxxxxxx
TRINITY_DN103181_c0_g1_m.6251	320	K	xxxxxxxxxx_K_Dxxxxxxxxx
TRINITY_DN92372_c0_g1_m.25575	133	K	xxxxxxxxxx_K_Exxxxxxxxx
TRINITY_DN103974_c0_g1_m.7997	746	K	xxxxxxxxxx_K_Exxxxxxxxx
TRINITY_DN103493_c0_g1_m.6956	647	K	xxxxxxxxxx_K_Exxxxxxxxx
TRINITY_DN89321_c0_g1_m.23055	342	K	xxxxxxxxxx_K_Axxxxxxxxx
TRINITY_DN102041_c0_g2_m.3846	419	K	xxxxxxxxxA_K_xxxxxxxxxx
TRINITY_DN91806_c0_g1_m.25040	182	K	xxxxxxxxxA_K_xxxxxxxxxx
TRINITY_DN104654_c1_g1_m.9481	129	K	xxxxxxxxxx_K_Dxxxxxxxxx
TRINITY_DN78381_c0_g1_m.19249	167	K	xKxxxxxxxx_K_xxxxxxxxxx
TRINITY_DN102484_c0_g5_m.4782	205	K	xxxxxxxxxV_K_xxxxxxxxxx
TRINITY_DN86416_c0_g1_m.21571	74	K	xxxxxxxxxx_K_Vxxxxxxxxx
TRINITY_DN98683_c3_g15_m.33984	97	K	xxxxxxxxxx_K_xxxxExxxxx
TRINITY_DN105549_c2_g3_m.11545	800	K	xxxxxxxxxx_K_Gxxxxxxxxx
TRINITY_DN105223_c2_g1_m.10826	92	K	xxxxxxxxxx_K_Gxxxxxxxxx
TRINITY_DN98385_c0_g1_m.33538	282	K	xxxxxxxxxx_K_Dxxxxxxxxx
TRINITY_DN103181_c0_g1_m.6251	20	K	xKxxxxxxxx_K_xxxxxxxxxx
TRINITY_DN90034_c0_g1_m.23519	356	K	xxxxxxxxxA_K_xxxxxxxxxx
TRINITY_DN100971_c0_g1_m.1757	126	K	xKxxxxxxxx_K_xxxxxxxxxx
TRINITY_DN92920_c0_g1_m.26114	83	K	xKxxxxxxxx_K_xxxxxxxxxx
TRINITY_DN94793_c0_g1_m.28254	105	K	xxxxxxxxxV_K_xxxxxxxxxx
TRINITY_DN98089_c1_g3_m.33031	32	K	xxxxxxxxxx_K_Dxxxxxxxxx
TRINITY_DN99674_c1_g3_m.35628	74	K	xxxxxxxxxA_K_xxxxxxxxxx
TRINITY_DN94046_c0_g1_m.27370	75	K	xxxKxxxExx_K_xxxxxxxxxx
TRINITY_DN89436_c0_g1_m.23135	62	K	xxxxxxxxxx_K_Vxxxxxxxxx
TRINITY_DN103270_c0_g1_m.6447	1372	K	xxxxxxxxxx_K_Axxxxxxxxx
TRINITY_DN88673_c0_g1_m.22662	114	K	xxxxxxxxxA_K_xxxxxxxxxx
TRINITY_DN55520_c0_g1_m.16899	77	K	xxxKxxxExx_K_xxxxxxxxxx
TRINITY_DN84782_c0_g1_m.20891	201	K	xxxKxxxExx_K_xxxxxxxxxx
TRINITY_DN52351_c0_g1_m.16713	183	K	xxxxxxxxxA_K_xxxxxxxxxx
TRINITY_DN100000_c0_g1_m.1	103	K	xxxxxxxxxx_K_Vxxxxxxxxx
TRINITY_DN98557_c0_g1_m.33797	91	K	xxxxxxxxxx_K_xxxxExxxxx
TRINITY_DN100597_c5_g1_m.1077	172	K	xxxxxxxxxV_K_xxxxxxxxxx
TRINITY_DN100971_c0_g1_m.1757	145	K	xxxxxxxxxA_K_xxxxxxxxxx
TRINITY_DN83266_c0_g1_m.20420	152	K	xxxxxxxxxV_K_xxxxxxxxxx
TRINITY_DN77401_c0_g1_m.19110	92	K	xxxxxxxxxx_K_Dxxxxxxxxx
TRINITY_DN96724_c0_g1_m.30959	32	K	xxxxxxxxxx_K_Dxxxxxxxxx
TRINITY_DN92907_c0_g1_m.26099	376	K	xxxxxxxxxx_K_Axxxxxxxxx
TRINITY_DN81010_c0_g1_m.19826	84	K	xxxxxxxxxx_K_Vxxxxxxxxx
TRINITY_DN100838_c7_g2_m.1523	164	K	xxxxxxxxxx_K_Exxxxxxxxx
TRINITY_DN91797_c0_g1_m.25035	90	K	xxxxxxxxxx_K_Axxxxxxxxx
TRINITY_DN96562_c0_g1_m.30729	265	K	xxxxxxxxxx_K_Dxxxxxxxxx
TRINITY_DN88275_c0_g1_m.22442	424	K	xKxxxxxxxx_K_xxxxxxxxxx
TRINITY_DN97071_c0_g1_m.31444	107	K	xxxxxxxxxx_K_Dxxxxxxxxx
TRINITY_DN10790_c0_g1_m.12825	70	K	xxxxxxxxxA_K_xxxxxxxxxx
TRINITY_DN99583_c0_g1_m.35454	343	K	xxxxxxxxxA_K_xxxxxxxxxx
TRINITY_DN95369_c0_g1_m.29026	483	K	xxxxxxxxxx_K_Axxxxxxxxx
TRINITY_DN92242_c1_g1_m.25455	742	K	xxxxxxxxxA_K_xxxxxxxxxx
TRINITY_DN94636_c0_g1_m.28074	466	K	xxxxxxxxxA_K_xxxxxxxxxx
TRINITY_DN95308_c0_g1_m.28928	324	K	xxxxxxxxxx_K_Axxxxxxxxx
TRINITY_DN92162_c0_g1_m.25376	118	K	xxxxxxxxxx_K_Axxxxxxxxx
TRINITY_DN135180_c0_g1_m.14871	20	K	xxxxxxxxxA_K_xxxxxxxxxx
TRINITY_DN90339_c0_g2_m.23804	121	K	xxxxxxxxxx_K_Exxxxxxxxx
TRINITY_DN88339_c0_g1_m.22482	159	K	xxxxxxxxxx_K_Gxxxxxxxxx
TRINITY_DN63600_c0_g1_m.17517	36	K	xxxxxxxxxx_K_Vxxxxxxxxx
TRINITY_DN97911_c0_g3_m.32745	139	K	xxxxxxxxxV_K_xxxxxxxxxx
TRINITY_DN95507_c1_g1_m.29232	350	K	xxxxxxxxxx_K_Exxxxxxxxx
TRINITY_DN93500_c0_g1_m.26712	117	K	xxxxxxxxxx_K_Vxxxxxxxxx
TRINITY_DN87616_c0_g1_m.22101	89	K	xxxxxxxxxx_K_Exxxxxxxxx
TRINITY_DN105870_c1_g9_m.12181	165	K	xxxxxxxxxx_K_xxxxExxxxx
TRINITY_DN101450_c0_g1_m.2721	100	K	xxxxxxxxxA_K_xxxxxxxxxx
TRINITY_DN91487_c0_g1_m.24772	513	K	xxxxxxxxxx_K_Vxxxxxxxxx
TRINITY_DN105712_c0_g3_m.11855	395	K	xxxxxxxxxx_K_Vxxxxxxxxx
TRINITY_DN80370_c0_g1_m.19687	130	K	xxxxxxxxxx_K_Dxxxxxxxxx
TRINITY_DN98707_c2_g1_m.34015	130	K	xxxxxxxxxx_K_Vxxxxxxxxx
TRINITY_DN88711_c0_g1_m.22691	94	K	xxxxxxxxxx_K_Gxxxxxxxxx
TRINITY_DN92499_c0_g1_m.25713	119	K	xxxxxxxxxA_K_xxxxxxxxxx
TRINITY_DN73357_c1_g3_m.18513	49	K	xxxxxxxxxA_K_xxxxxxxxxx
TRINITY_DN94632_c0_g1_m.28069	284	K	xKxxxxxxxx_K_xxxxxxxxxx
TRINITY_DN92551_c0_g1_m.25760	89	K	xxxxxxxxxx_K_xxxxExxxxx
TRINITY_DN93722_c0_g1_m.26997	325	K	xxxKxxxExx_K_xxxxxxxxxx
TRINITY_DN100585_c1_g1_m.1061	124	K	xxxxxxxxxx_K_Vxxxxxxxxx
TRINITY_DN95046_c0_g1_m.28550	94	K	xxxxxxxxxx_K_Exxxxxxxxx
TRINITY_DN92746_c0_g1_m.25927	204	K	xxxxxxxxxx_K_Exxxxxxxxx
TRINITY_DN80778_c0_g1_m.19768	180	K	xxxxxxxxxx_K_Exxxxxxxxx
TRINITY_DN88750_c0_g1_m.22715	130	K	xxxxxxxxxx_K_Dxxxxxxxxx
TRINITY_DN92242_c1_g1_m.25455	394	K	xxxxxxxxxA_K_xxxxxxxxxx
TRINITY_DN104983_c2_g2_m.10276	620	K	xxxxxxxxxA_K_xxxxxxxxxx
TRINITY_DN92812_c0_g2_m.25989	113	K	xxxxxxxxxV_K_xxxxxxxxxx
TRINITY_DN103493_c0_g1_m.6956	341	K	xxxxxxxxxA_K_xxxxxxxxxx
TRINITY_DN94470_c0_g1_m.27881	749	K	xxxxxxxxxx_K_Vxxxxxxxxx
TRINITY_DN82380_c1_g2_m.20182	157	K	xxxxxxxxxx_K_Axxxxxxxxx
TRINITY_DN100838_c7_g2_m.1523	222	K	xxxxxxxxxx_K_xxxxExxxxx
TRINITY_DN94046_c0_g1_m.27370	115	K	xxxxxxxxxx_K_xxxxExxxxx
TRINITY_DN97400_c1_g2_m.31974	24	K	xxxxxxxxxA_K_xxxxxxxxxx
TRINITY_DN87689_c0_g1_m.22149	210	K	xxxxxxxxxx_K_Axxxxxxxxx
TRINITY_DN97743_c1_g1_m.32474	213	K	xxxxxxxxxx_K_Gxxxxxxxxx
TRINITY_DN90641_c0_g1_m.24034	442	K	xxxxxxxxxx_K_Dxxxxxxxxx
TRINITY_DN100763_c0_g1_m.1391	655	K	xxxxxxxxxV_K_xxxxxxxxxx
TRINITY_DN97838_c1_g3_m.32623	219	K	xxxxxxxxxx_K_Dxxxxxxxxx
TRINITY_DN102018_c0_g1_m.3783	184	K	xxxxxxxxxA_K_xxxxxxxxxx
TRINITY_DN100885_c2_g3_m.1615	128	K	xxxxxxxxxx_K_Gxxxxxxxxx
TRINITY_DN102564_c0_g1_m.4983	468	K	xxxxxxxxxx_K_Vxxxxxxxxx
TRINITY_DN97282_c0_g1_m.31786	443	K	xxxKxxxExx_K_xxxxxxxxxx
TRINITY_DN98809_c0_g1_m.34192	134	K	xxxxxxxxxA_K_xxxxxxxxxx
TRINITY_DN93054_c1_g1_m.26234	169	K	xxxxxxxxxA_K_xxxxxxxxxx
TRINITY_DN83983_c1_g1_m.20663	124	K	xxxxxxxxxx_K_Exxxxxxxxx
TRINITY_DN90075_c0_g1_m.23577	483	K	xxxxxxxxxV_K_xxxxxxxxxx
TRINITY_DN90476_c0_g1_m.23924	21	K	xxxxxxxxxx_K_Dxxxxxxxxx
TRINITY_DN78455_c0_g1_m.19256	180	K	xKxxxxxxxx_K_xxxxxxxxxx
TRINITY_DN104843_c0_g1_m.9949	226	K	xxxxxxxxxA_K_xxxxxxxxxx
TRINITY_DN92499_c0_g1_m.25713	149	K	xxxxxxxxxA_K_xxxxxxxxxx
TRINITY_DN100516_c7_g1_m.909	199	K	xxxxxxxxxx_K_Exxxxxxxxx
TRINITY_DN89321_c0_g1_m.23055	427	K	xxxxxxxxxx_K_Exxxxxxxxx
TRINITY_DN99096_c0_g1_m.34648	201	K	xxxxxxxxxx_K_Exxxxxxxxx
TRINITY_DN90416_c1_g1_m.23871	130	K	xxxxxxxxxV_K_xxxxxxxxxx
TRINITY_DN101773_c0_g1_m.3352	514	K	xxxxxxxxxA_K_xxxxxxxxxx
TRINITY_DN82151_c0_g1_m.20122	351	K	xxxxxxxxxA_K_xxxxxxxxxx
TRINITY_DN94470_c0_g1_m.27881	356	K	xxxxxxxxxV_K_xxxxxxxxxx
TRINITY_DN104664_c0_g27_m.9515	23	K	xxxxxxxxxx_K_xxxxExxxxx
TRINITY_DN102039_c0_g3_m.3840	105	K	xxxxxxxxxx_K_xxxxExxxxx
TRINITY_DN103270_c0_g1_m.6447	1574	K	xKxxxxxxxx_K_xxxxxxxxxx
TRINITY_DN100885_c2_g3_m.1615	76	K	xxxxxxxxxA_K_xxxxxxxxxx
TRINITY_DN91672_c0_g2_m.24937	262	K	xxxxxxxxxV_K_xxxxxxxxxx
TRINITY_DN75629_c0_g1_m.18812	309	K	xxxxxxxxxx_K_Dxxxxxxxxx
TRINITY_DN103833_c0_g31_m.7717	61	K	xxxxxxxxxx_K_Dxxxxxxxxx
TRINITY_DN92879_c0_g2_m.26063	109	K	xKxxxxxxxx_K_xxxxxxxxxx
TRINITY_DN100689_c3_g3_m.1267	44	K	xxxxxxxxxx_K_Exxxxxxxxx
TRINITY_DN90683_c1_g1_m.24075	41	K	xxxxxxxxxx_K_Vxxxxxxxxx
TRINITY_DN101332_c0_g5_m.2479	176	K	xxxxxxxxxV_K_xxxxxxxxxx
TRINITY_DN104344_c3_g4_m.8784	194	K	xxxxxxxxxx_K_Exxxxxxxxx
TRINITY_DN98303_c3_g1_m.33397	203	K	xxxxxxxxxx_K_Vxxxxxxxxx
TRINITY_DN101319_c6_g1_m.2455	422	K	xxxxxxxxxx_K_xxxxExxxxx
TRINITY_DN95079_c0_g1_m.28595	57	K	xxxxxxxxxx_K_xxxxExxxxx
TRINITY_DN51048_c0_g1_m.16604	353	K	xxxxxxxxxx_K_Axxxxxxxxx
TRINITY_DN104037_c3_g1_m.8129	439	K	xxxxxxxxxx_K_xxxxExxxxx
TRINITY_DN104669_c0_g1_m.9525	398	K	xxxxxxxxxx_K_Dxxxxxxxxx
TRINITY_DN92293_c0_g2_m.25503	171	K	xxxxxxxxxV_K_xxxxxxxxxx
TRINITY_DN79311_c0_g1_m.19445	141	K	xxxxxxxxxx_K_Exxxxxxxxx
TRINITY_DN99932_c1_g1_m.36066	116	K	xxxxxxxxxx_K_Exxxxxxxxx
TRINITY_DN721_c0_g2_m.18360	382	K	xxxxxxxxxx_K_Dxxxxxxxxx
TRINITY_DN89820_c0_g1_m.23396	57	K	xKxxxxxxxx_K_xxxxxxxxxx
TRINITY_DN87916_c0_g1_m.22279	117	K	xxxxxxxxxA_K_xxxxxxxxxx
TRINITY_DN42304_c0_g1_m.16189	278	K	xxxxxxxxxA_K_xxxxxxxxxx
TRINITY_DN95633_c0_g1_m.29414	158	K	xxxxxxxxxx_K_Dxxxxxxxxx
TRINITY_DN98076_c0_g2_m.33010	73	K	xxxxxxxxxx_K_Axxxxxxxxx
TRINITY_DN90142_c0_g1_m.23637	74	K	xxxxxxxxxx_K_Dxxxxxxxxx
TRINITY_DN93054_c1_g1_m.26234	280	K	xxxxxxxxxx_K_Dxxxxxxxxx
TRINITY_DN84369_c0_g1_m.20773	65	K	xxxxxxxxxA_K_xxxxxxxxxx
TRINITY_DN102484_c0_g5_m.4782	182	K	xKxxxxxxxx_K_xxxxxxxxxx
TRINITY_DN87878_c0_g1_m.22249	196	K	xxxxxxxxxx_K_Vxxxxxxxxx
TRINITY_DN97646_c1_g1_m.32332	443	K	xxxxxxxxxA_K_xxxxxxxxxx
TRINITY_DN92120_c0_g1_m.25332	125	K	xxxxxxxxxx_K_Gxxxxxxxxx
TRINITY_DN103239_c0_g1_m.6403	868	K	xxxxxxxxxx_K_Exxxxxxxxx
TRINITY_DN95475_c0_g1_m.29199	275	K	xxxxxxxxxx_K_xxxxExxxxx
TRINITY_DN99292_c0_g1_m.34995	161	K	xxxxxxxxxA_K_xxxxxxxxxx
TRINITY_DN91487_c0_g1_m.24772	293	K	xxxxxxxxxx_K_Gxxxxxxxxx
TRINITY_DN90631_c0_g1_m.24016	11	K	xxxxxxxxxx_K_Axxxxxxxxx
TRINITY_DN101684_c1_g2_m.3184	808	K	xxxxxxxxxx_K_Axxxxxxxxx
TRINITY_DN95642_c0_g1_m.29422	236	K	xxxxxxxxxx_K_Axxxxxxxxx
TRINITY_DN77008_c0_g1_m.19048	92	K	xxxxxxxxxx_K_Gxxxxxxxxx
TRINITY_DN99674_c1_g3_m.35628	518	K	xxxxxxxxxx_K_Exxxxxxxxx
TRINITY_DN90773_c0_g1_m.24146	183	K	xxxxxxxxxx_K_Vxxxxxxxxx
TRINITY_DN89277_c0_g2_m.23023	178	K	xxxxxxxxxx_K_Dxxxxxxxxx
TRINITY_DN98215_c3_g2_m.33208	124	K	xxxxxxxxxY_K_xxxxxxxxxx
TRINITY_DN91443_c0_g2_m.24728	81	K	xxxKxxxExx_K_xxxxxxxxxx
TRINITY_DN95962_c0_g1_m.29847	4	K	xxxxxxxxxx_K_xxxxExxxxx
TRINITY_DN105288_c2_g1_m.10974	172	K	xxxxxxxxxx_K_xxxxExxxxx
TRINITY_DN73911_c0_g1_m.18592	40	K	xxxxxxxxxx_K_Gxxxxxxxxx
TRINITY_DN98718_c0_g1_m.34036	165	K	xxxxxxxxxx_K_Gxxxxxxxxx
TRINITY_DN88061_c0_g1_m.22326	403	K	xxxxxxxxxx_K_Gxxxxxxxxx
TRINITY_DN82214_c0_g1_m.20144	126	K	xxxxxxxxxA_K_xxxxxxxxxx
TRINITY_DN99283_c0_g1_m.34976	458	K	xxxxxxxxxA_K_xxxxxxxxxx
TRINITY_DN87897_c0_g1_m.22265	15	K	xxxxxxxxxx_K_xxxxExxxxx
TRINITY_DN99268_c0_g1_m.34952	238	K	xxxxxxxxxA_K_xxxxxxxxxx
TRINITY_DN95820_c0_g1_m.29646	291	K	xxxxxxxxxx_K_Dxxxxxxxxx
TRINITY_DN90084_c0_g1_m.23590	42	K	xxxxxxxxxV_K_xxxxxxxxxx
TRINITY_DN103270_c0_g1_m.6447	198	K	xxxxxxxxxA_K_xxxxxxxxxx
TRINITY_DN99526_c1_g1_m.35368	190	K	xxxxxxxxxA_K_xxxxxxxxxx
TRINITY_DN97288_c0_g1_m.31794	261	K	xxxxxxxxxx_K_Exxxxxxxxx
TRINITY_DN90121_c0_g1_m.23620	55	K	xxxxxxxxxY_K_xxxxxxxxxx
TRINITY_DN75140_c0_g1_m.18753	149	K	xxxxxxxxxx_K_Axxxxxxxxx
TRINITY_DN97804_c0_g7_m.32570	147	K	xxxxxxxxxx_K_Exxxxxxxxx
TRINITY_DN90837_c0_g1_m.24207	71	K	xKxxxxxxxx_K_xxxxxxxxxx
TRINITY_DN96424_c0_g1_m.30528	21	K	xxxxxxxxxx_K_xxxxExxxxx
TRINITY_DN76939_c0_g1_m.19038	71	K	xxxxxxxxxx_K_Vxxxxxxxxx
TRINITY_DN100650_c4_g2_m.1181	188	K	xxxxxxxxxx_K_Dxxxxxxxxx
TRINITY_DN104344_c3_g4_m.8784	113	K	xxxxxxxxxx_K_Vxxxxxxxxx
TRINITY_DN105189_c5_g1_m.10750	111	K	xxxxxxxxxx_K_Exxxxxxxxx
TRINITY_DN97470_c1_g1_m.32077	195	K	xxxxxxxxxx_K_Vxxxxxxxxx
TRINITY_DN88390_c0_g1_m.22513	147	K	xxxxxxxxxx_K_Exxxxxxxxx
TRINITY_DN105189_c5_g1_m.10750	666	K	xxxxxxxxxA_K_xxxxxxxxxx
TRINITY_DN93031_c0_g1_m.26213	297	K	xKxxxxxxxx_K_xxxxxxxxxx
TRINITY_DN92074_c0_g2_m.25288	162	K	xxxxxxxxxx_K_xxxxExxxxx
TRINITY_DN98215_c3_g19_m.33207	164	K	xKxxxxxxxx_K_xxxxxxxxxx
TRINITY_DN77401_c0_g1_m.19110	149	K	xxxxxxxxxx_K_xxxxExxxxx
TRINITY_DN93720_c1_g1_m.26996	149	K	xxxxxxxxxx_K_Exxxxxxxxx
TRINITY_DN102126_c0_g1_m.4011	205	K	xxxxxxxxxx_K_xxxxExxxxx
TRINITY_DN99618_c1_g1_m.35517	164	K	xxxxxxxxxx_K_Vxxxxxxxxx
TRINITY_DN91264_c0_g1_m.24566	278	K	xxxxxxxxxx_K_Exxxxxxxxx
TRINITY_DN98215_c3_g2_m.33208	80	K	xxxxxxxxxx_K_Axxxxxxxxx
TRINITY_DN97928_c0_g1_m.32775	421	K	xKxxxxxxxx_K_xxxxxxxxxx
TRINITY_DN88711_c0_g1_m.22691	52	K	xxxxxxxxxA_K_xxxxxxxxxx
TRINITY_DN103272_c0_g1_m.6449	268	K	xxxxxxxxxx_K_Exxxxxxxxx
TRINITY_DN104708_c1_g1_m.9594	428	K	xxxxxxxxxx_K_Vxxxxxxxxx
TRINITY_DN87843_c0_g1_m.22228	183	K	xxxxxxxxxV_K_xxxxxxxxxx
TRINITY_DN98920_c1_g1_m.34361	21	K	xxxxxxxxxx_K_Axxxxxxxxx
TRINITY_DN99946_c0_g1_m.36092	399	K	xxxxxxxxxx_K_Gxxxxxxxxx
TRINITY_DN103413_c0_g1_m.6788	366	K	xxxxxxxxxx_K_Gxxxxxxxxx
TRINITY_DN94819_c0_g1_m.28287	179	K	xxxxxxxxxx_K_Exxxxxxxxx
TRINITY_DN104961_c1_g2_m.10230	232	K	xxxxxxxxxx_K_xxxxExxxxx
TRINITY_DN4821_c0_g2_m.16446	43	K	xxxxxxxxxx_K_Exxxxxxxxx
TRINITY_DN99642_c0_g1_m.35567	237	K	xxxxxxxxxx_K_Vxxxxxxxxx
TRINITY_DN94470_c0_g1_m.27881	325	K	xxxxxxxxxx_K_Dxxxxxxxxx
TRINITY_DN91703_c1_g1_m.24965	169	K	xxxxxxxxxA_K_xxxxxxxxxx
TRINITY_DN79311_c0_g1_m.19445	148	K	xxxxxxxxxx_K_Exxxxxxxxx
TRINITY_DN102527_c0_g3_m.4901	169	K	xxxxxxxxxx_K_Dxxxxxxxxx
TRINITY_DN103527_c1_g2_m.7055	266	K	xxxxxxxxxA_K_xxxxxxxxxx
TRINITY_DN102851_c1_g1_m.5549	206	K	xxxxxxxxxx_K_Axxxxxxxxx
TRINITY_DN96265_c0_g1_m.30304	241	K	xKxxxxxxxx_K_xxxxxxxxxx
TRINITY_DN95832_c1_g1_m.29660	155	K	xxxxxxxxxA_K_xxxxxxxxxx
TRINITY_DN95774_c0_g1_m.29589	152	K	xxxxxxxxxx_K_Axxxxxxxxx
TRINITY_DN80879_c0_g1_m.19792	338	K	xxxxxxxxxx_K_Exxxxxxxxx
TRINITY_DN97804_c0_g11_m.32567	67	K	xxxxxxxxxx_K_Exxxxxxxxx
TRINITY_DN105462_c1_g2_m.11380	87	K	xxxxxxxxxx_K_Axxxxxxxxx
TRINITY_DN96287_c0_g1_m.30344	336	K	xKxxxxxxxx_K_xxxxxxxxxx
TRINITY_DN102168_c1_g1_m.4094	107	K	xxxxxxxxxx_K_Gxxxxxxxxx
TRINITY_DN94453_c1_g2_m.27864	341	K	xxxxxxxxxA_K_xxxxxxxxxx
TRINITY_DN89424_c1_g1_m.23130	292	K	xxxxxxxxxx_K_Dxxxxxxxxx
TRINITY_DN86584_c0_g1_m.21646	132	K	xxxxxxxxxx_K_Axxxxxxxxx
TRINITY_DN104953_c1_g3_m.10217	17	K	xxxxxxxxxx_K_Vxxxxxxxxx
TRINITY_DN81786_c0_g1_m.20026	45	K	xxxxxxxxxx_K_Gxxxxxxxxx
TRINITY_DN100999_c1_g1_m.1813	132	K	xxxxxxxxxx_K_Exxxxxxxxx
TRINITY_DN101725_c1_g1_m.3268	379	K	xxxxxxxxxx_K_xxxxExxxxx
TRINITY_DN94812_c0_g1_m.28275	139	K	xxxxxxxxxx_K_Exxxxxxxxx
TRINITY_DN90642_c0_g1_m.24036	286	K	xxxxxxxxxx_K_xxxxExxxxx
TRINITY_DN94046_c0_g1_m.27370	128	K	xxxxxxxxxx_K_Gxxxxxxxxx
TRINITY_DN104929_c0_g1_m.10154	60	K	xKxxxxxxxx_K_xxxxxxxxxx
TRINITY_DN99904_c0_g1_m.36020	181	K	xxxxxxxxxx_K_Axxxxxxxxx
TRINITY_DN92860_c0_g1_m.26038	347	K	xxxxxxxxxx_K_Axxxxxxxxx
TRINITY_DN94862_c0_g1_m.28333	227	K	xxxxxxxxxx_K_Dxxxxxxxxx
TRINITY_DN79311_c0_g1_m.19445	72	K	xxxxxxxxxx_K_Exxxxxxxxx
TRINITY_DN104128_c1_g1_m.8348	477	K	xxxxxxxxxA_K_xxxxxxxxxx
TRINITY_DN102564_c0_g1_m.4983	392	K	xxxxxxxxxx_K_Gxxxxxxxxx
TRINITY_DN67522_c0_g1_m.17811	66	K	xxxxxxxxxx_K_Exxxxxxxxx
TRINITY_DN93026_c1_g1_m.26210	73	K	xxxxxxxxxx_K_Dxxxxxxxxx
TRINITY_DN88750_c0_g1_m.22715	172	K	xKxxxxxxxx_K_xxxxxxxxxx
TRINITY_DN97563_c0_g1_m.32213	444	K	xxxxxxxxxx_K_Dxxxxxxxxx
TRINITY_DN97480_c1_g1_m.32093	805	K	xKxxxxxxxx_K_xxxxxxxxxx
TRINITY_DN103997_c0_g2_m.8041	1128	K	xxxxxxxxxx_K_Exxxxxxxxx
TRINITY_DN99642_c0_g1_m.35567	286	K	xxxxxxxxxx_K_Exxxxxxxxx
TRINITY_DN99722_c6_g1_m.35700	156	K	xxxxxxxxxx_K_Vxxxxxxxxx
TRINITY_DN104206_c2_g2_m.8491	638	K	xxxxxxxxxx_K_Axxxxxxxxx
TRINITY_DN90546_c1_g1_m.23968	303	K	xxxxxxxxxx_K_Dxxxxxxxxx
TRINITY_DN96823_c0_g1_m.31121	79	K	xKxxxxxxxx_K_xxxxxxxxxx
TRINITY_DN97843_c0_g1_m.32632	118	K	xxxxxxxxxx_K_Exxxxxxxxx
TRINITY_DN95369_c0_g1_m.29026	473	K	xxxxxxxxxx_K_Vxxxxxxxxx
TRINITY_DN93435_c0_g2_m.26640	40	K	xxxxxxxxxx_K_Exxxxxxxxx
TRINITY_DN83653_c0_g1_m.20532	223	K	xxxxxxxxxx_K_Vxxxxxxxxx
TRINITY_DN102018_c0_g1_m.3783	682	K	xxxxxxxxxY_K_xxxxxxxxxx
TRINITY_DN89951_c0_g1_m.23464	115	K	xKxxxxxxxx_K_xxxxxxxxxx
TRINITY_DN97646_c1_g1_m.32332	235	K	xKxxxxxxxx_K_xxxxxxxxxx
TRINITY_DN94595_c0_g1_m.28019	23	K	xxxxxxxxxA_K_xxxxxxxxxx
TRINITY_DN100616_c1_g1_m.1117	417	K	xxxxxxxxxx_K_Gxxxxxxxxx
TRINITY_DN61373_c0_g1_m.17300	318	K	xxxxxxxxxA_K_xxxxxxxxxx
TRINITY_DN96287_c0_g1_m.30344	327	K	xxxxxxxxxx_K_Axxxxxxxxx
TRINITY_DN83219_c0_g2_m.20398	99	K	xKxxxxxxxx_K_xxxxxxxxxx
TRINITY_DN80879_c0_g1_m.19792	316	K	xxxxxxxxxx_K_Exxxxxxxxx
TRINITY_DN96355_c0_g1_m.30430	273	K	xxxxxxxxxx_K_Dxxxxxxxxx
TRINITY_DN99730_c1_g1_m.35718	254	K	xxxxxxxxxx_K_Exxxxxxxxx
TRINITY_DN83486_c0_g1_m.20488	30	K	xxxxxxxxxx_K_Axxxxxxxxx
TRINITY_DN88739_c0_g1_m.22711	411	K	xxxxxxxxxx_K_Axxxxxxxxx
TRINITY_DN97745_c0_g1_m.32480	490	K	xxxxxxxxxx_K_Gxxxxxxxxx
TRINITY_DN101419_c5_g1_m.2655	121	K	xxxxxxxxxV_K_xxxxxxxxxx
TRINITY_DN87654_c0_g1_m.22133	79	K	xxxxxxxxxx_K_xxxxExxxxx
TRINITY_DN88222_c0_g1_m.22415	202	K	xxxxxxxxxx_K_Axxxxxxxxx
TRINITY_DN95157_c0_g1_m.28698	151	K	xxxxxxxxxA_K_xxxxxxxxxx
TRINITY_DN93790_c1_g1_m.27085	366	K	xKxxxxxxxx_K_xxxxxxxxxx
TRINITY_DN87886_c0_g1_m.22253	523	K	xxxxxxxxxx_K_Exxxxxxxxx
TRINITY_DN78180_c0_g2_m.19215	79	K	xxxxxxxxxY_K_xxxxxxxxxx
TRINITY_DN97149_c0_g1_m.31576	283	K	xxxxxxxxxx_K_xxxxExxxxx
TRINITY_DN95012_c0_g1_m.28504	176	K	xxxxxxxxxx_K_Gxxxxxxxxx
TRINITY_DN92499_c0_g1_m.25713	172	K	xxxxxxxxxx_K_xxxxExxxxx
TRINITY_DN103105_c0_g1_m.6090	133	K	xxxxxxxxxx_K_Axxxxxxxxx
TRINITY_DN103453_c0_g2_m.6868	202	K	xxxxxxxxxV_K_xxxxxxxxxx
TRINITY_DN105019_c2_g13_m.10355	145	K	xxxxxxxxxx_K_Axxxxxxxxx
TRINITY_DN92499_c0_g1_m.25713	313	K	xxxxxxxxxx_K_Dxxxxxxxxx
TRINITY_DN91989_c0_g1_m.25210	228	K	xxxxxxxxxx_K_Axxxxxxxxx
TRINITY_DN86234_c0_g1_m.21482	81	K	xxxxxxxxxx_K_Axxxxxxxxx
TRINITY_DN75765_c0_g1_m.18827	228	K	xxxxxxxxxx_K_Dxxxxxxxxx
TRINITY_DN94362_c0_g1_m.27735	108	K	xxxxxxxxxx_K_Dxxxxxxxxx
TRINITY_DN95130_c0_g3_m.28664	223	K	xxxxxxxxxx_K_Vxxxxxxxxx
TRINITY_DN82380_c1_g2_m.20182	57	K	xxxxxxxxxx_K_Vxxxxxxxxx
TRINITY_DN50714_c0_g3_m.16590	139	K	xxxxxxxxxx_K_Exxxxxxxxx
TRINITY_DN98958_c0_g1_m.34422	237	K	xKxxxxxxxx_K_xxxxxxxxxx
TRINITY_DN88603_c1_g1_m.22627	78	K	xxxxxxxxxx_K_Dxxxxxxxxx
TRINITY_DN92551_c0_g1_m.25760	203	K	xxxxxxxxxx_K_Gxxxxxxxxx
TRINITY_DN93236_c1_g1_m.26407	305	K	xxxxxxxxxx_K_Axxxxxxxxx
TRINITY_DN97037_c0_g1_m.31388	134	K	xxxxxxxxxx_K_Axxxxxxxxx
TRINITY_DN105223_c2_g1_m.10826	57	K	xxxxxxxxxx_K_Vxxxxxxxxx
TRINITY_DN100754_c0_g2_m.1384	166	K	xxxxxxxxxV_K_xxxxxxxxxx
TRINITY_DN95475_c0_g1_m.29199	177	K	xxxxxxxxxx_K_xxxxExxxxx
TRINITY_DN99100_c0_g1_m.34657	371	K	xKxxxxxxxx_K_xxxxxxxxxx
TRINITY_DN88318_c0_g1_m.22470	37	K	xKxxxxxxxx_K_xxxxxxxxxx
TRINITY_DN88730_c0_g1_m.22704	346	K	xKxxxxxxxx_K_xxxxxxxxxx
TRINITY_DN87101_c0_g1_m.21894	172	K	xxxxxxxxxx_K_Exxxxxxxxx
TRINITY_DN98577_c3_g1_m.33821	190	K	xxxxxxxxxx_K_Dxxxxxxxxx
TRINITY_DN96496_c1_g2_m.30631	238	K	xxxxxxxxxx_K_Dxxxxxxxxx
TRINITY_DN95043_c2_g1_m.28543	409	K	xxxxxxxxxx_K_Axxxxxxxxx
TRINITY_DN97275_c0_g1_m.31778	216	K	xxxxxxxxxx_K_Dxxxxxxxxx
TRINITY_DN103010_c1_g1_m.5891	134	K	xxxxxxxxxx_K_Gxxxxxxxxx
TRINITY_DN97282_c0_g1_m.31786	600	K	xxxxxxxxxV_K_xxxxxxxxxx
TRINITY_DN94262_c0_g1_m.27610	174	K	xxxxxxxxxx_K_Gxxxxxxxxx
TRINITY_DN83210_c0_g1_m.20393	141	K	xxxxxxxxxx_K_Exxxxxxxxx
TRINITY_DN95043_c2_g1_m.28543	428	K	xxxxxxxxxx_K_Exxxxxxxxx
TRINITY_DN96759_c4_g1_m.31020	53	K	xKxxxxxxxx_K_xxxxxxxxxx
TRINITY_DN94662_c0_g1_m.28114	120	K	xKxxxxxxxx_K_xxxxxxxxxx
TRINITY_DN93354_c0_g1_m.26546	168	K	xxxxxxxxxA_K_xxxxxxxxxx
TRINITY_DN83574_c0_g1_m.20510	15	K	xxxxxxxxxx_K_Gxxxxxxxxx
TRINITY_DN103851_c0_g1_m.7756	100	K	xxxxxxxxxx_K_Dxxxxxxxxx
TRINITY_DN103270_c0_g1_m.6447	821	K	xxxxxxxxxV_K_xxxxxxxxxx
TRINITY_DN100500_c0_g1_m.867	406	K	xxxxxxxxxx_K_Exxxxxxxxx
TRINITY_DN91569_c0_g1_m.24849	138	K	xxxxxxxxxx_K_Axxxxxxxxx
TRINITY_DN102041_c0_g2_m.3846	187	K	xxxxxxxxxx_K_xxxxExxxxx
TRINITY_DN97066_c1_g1_m.31437	612	K	xxxxxxxxxY_K_xxxxxxxxxx
TRINITY_DN104293_c0_g1_m.8678	801	K	xxxxxxxxxx_K_Exxxxxxxxx
TRINITY_DN92120_c0_g1_m.25332	120	K	xxxxxxxxxx_K_Exxxxxxxxx
TRINITY_DN105870_c1_g6_m.12180	205	K	xxxxxxxxxx_K_Dxxxxxxxxx
TRINITY_DN62083_c0_g1_m.17372	28	K	xxxxxxxxxx_K_xxxxExxxxx
TRINITY_DN103764_c10_g1_m.7567	487	K	xxxxxxxxxx_K_xxxxExxxxx
TRINITY_DN83861_c0_g1_m.20612	126	K	xKxxxxxxxx_K_xxxxxxxxxx
TRINITY_DN92861_c0_g2_m.26039	198	K	xxxxxxxxxx_K_Gxxxxxxxxx
TRINITY_DN99096_c0_g1_m.34648	170	K	xxxxxxxxxx_K_Axxxxxxxxx
TRINITY_DN103181_c0_g1_m.6252	551	K	xxxxxxxxxx_K_Dxxxxxxxxx
TRINITY_DN94270_c0_g1_m.27619	400	K	xxxxxxxxxA_K_xxxxxxxxxx
TRINITY_DN91011_c0_g1_m.24349	172	K	xxxxxxxxxx_K_Axxxxxxxxx
TRINITY_DN96118_c0_g1_m.30063	18	K	xxxxxxxxxx_K_Axxxxxxxxx
TRINITY_DN96438_c0_g1_m.30539	910	K	xxxxxxxxxx_K_Dxxxxxxxxx
TRINITY_DN92741_c0_g1_m.25924	346	K	xxxxxxxxxx_K_Axxxxxxxxx
TRINITY_DN95157_c0_g1_m.28698	421	K	xxxxxxxxxx_K_Gxxxxxxxxx
TRINITY_DN96884_c0_g1_m.31191	106	K	xxxxxxxxxx_K_Gxxxxxxxxx
TRINITY_DN96355_c0_g1_m.30430	109	K	xxxxxxxxxx_K_Vxxxxxxxxx
TRINITY_DN96337_c0_g1_m.30405	96	K	xxxxxxxxxA_K_xxxxxxxxxx
TRINITY_DN88918_c0_g1_m.22822	139	K	xxxxxxxxxx_K_Exxxxxxxxx
TRINITY_DN105870_c1_g6_m.12180	188	K	xxxxxxxxxx_K_xxxxExxxxx
TRINITY_DN100617_c0_g1_m.1121	213	K	xxxxxxxxxx_K_Dxxxxxxxxx
TRINITY_DN87155_c0_g2_m.21913	144	K	xKxxxxxxxx_K_xxxxxxxxxx
TRINITY_DN95396_c1_g1_m.29067	105	K	xKxxxxxxxx_K_xxxxxxxxxx
TRINITY_DN90960_c0_g1_m.24318	660	K	xxxxxxxxxx_K_Axxxxxxxxx
TRINITY_DN91809_c0_g1_m.25046	199	K	xxxxxxxxxx_K_Gxxxxxxxxx
TRINITY_DN97249_c2_g1_m.31737	219	K	xKxxxxxxxx_K_xxxxxxxxxx
TRINITY_DN95350_c0_g1_m.28990	196	K	xxxxxxxxxx_K_xxxxExxxxx
TRINITY_DN97757_c0_g1_m.32505	153	K	xxxxxxxxxx_K_Gxxxxxxxxx
TRINITY_DN94820_c0_g1_m.28290	100	K	xxxxxxxxxx_K_Exxxxxxxxx
TRINITY_DN98577_c3_g1_m.33821	169	K	xxxxxxxxxx_K_Exxxxxxxxx
TRINITY_DN103239_c0_g1_m.6403	476	K	xxxxxxxxxx_K_Exxxxxxxxx
TRINITY_DN95396_c1_g1_m.29067	338	K	xKxxxxxxxx_K_xxxxxxxxxx
TRINITY_DN99597_c1_g1_m.35472	605	K	xxxxxxxxxx_K_xxxxExxxxx
TRINITY_DN103181_c0_g1_m.6251	564	K	xxxxxxxxxx_K_Axxxxxxxxx
TRINITY_DN92233_c0_g1_m.25449	282	K	xxxxxxxxxV_K_xxxxxxxxxx
TRINITY_DN81346_c0_g1_m.19921	264	K	xKxxxxxxxx_K_xxxxxxxxxx
TRINITY_DN88589_c0_g1_m.22620	47	K	xxxKxxxExx_K_xxxxxxxxxx
TRINITY_DN85598_c0_g2_m.21173	37	K	xxxxxxxxxx_K_Vxxxxxxxxx
TRINITY_DN87689_c0_g1_m.22149	345	K	xxxxxxxxxx_K_Gxxxxxxxxx
TRINITY_DN99793_c2_g1_m.35818	98	K	xxxxxxxxxA_K_xxxxxxxxxx
TRINITY_DN101629_c1_g2_m.3102	372	K	xxxxxxxxxx_K_Exxxxxxxxx
TRINITY_DN100622_c1_g2_m.1132	920	K	xKxxxxxxxx_K_xxxxxxxxxx
TRINITY_DN87721_c0_g1_m.22164	289	K	xxxxxxxxxA_K_xxxxxxxxxx
TRINITY_DN99155_c0_g1_m.34740	200	K	xKxxxxxxxx_K_xxxxxxxxxx
TRINITY_DN91239_c0_g1_m.24531	69	K	xxxxxxxxxY_K_xxxxxxxxxx
TRINITY_DN92021_c0_g1_m.25233	112	K	xxxxxxxxxx_K_Gxxxxxxxxx
TRINITY_DN103260_c1_g2_m.6433	893	K	xxxxxxxxxx_K_Exxxxxxxxx
TRINITY_DN104929_c0_g1_m.10154	151	K	xxxxxxxxxx_K_Dxxxxxxxxx
TRINITY_DN97480_c1_g1_m.32093	287	K	xxxxxxxxxx_K_Exxxxxxxxx
TRINITY_DN100064_c0_g1_m.96	1053	K	xxxxxxxxxx_K_Vxxxxxxxxx
TRINITY_DN92233_c0_g1_m.25449	517	K	xxxxxxxxxx_K_Vxxxxxxxxx
TRINITY_DN92536_c1_g1_m.25744	95	K	xxxxxxxxxA_K_xxxxxxxxxx
TRINITY_DN92499_c0_g1_m.25713	610	K	xxxxxxxxxx_K_Exxxxxxxxx
TRINITY_DN96852_c0_g1_m.31155	157	K	xKxxxxxxxx_K_xxxxxxxxxx
TRINITY_DN92090_c0_g1_m.25309	168	K	xxxxxxxxxx_K_Dxxxxxxxxx
TRINITY_DN100512_c0_g12_m.890	71	K	xxxxxxxxxx_K_Vxxxxxxxxx
TRINITY_DN93461_c1_g1_m.26665	65	K	xxxxxxxxxA_K_xxxxxxxxxx
TRINITY_DN98215_c3_g18_m.33206	164	K	xKxxxxxxxx_K_xxxxxxxxxx
TRINITY_DN91364_c1_g1_m.24671	111	K	xxxxxxxxxx_K_Axxxxxxxxx
TRINITY_DN88918_c0_g1_m.22822	80	K	xxxxxxxxxx_K_Vxxxxxxxxx
TRINITY_DN86809_c0_g1_m.21753	135	K	xxxxxxxxxx_K_Axxxxxxxxx
TRINITY_DN86416_c0_g1_m.21571	291	K	xKxxxxxxxx_K_xxxxxxxxxx
TRINITY_DN90539_c0_g1_m.23963	126	K	xxxxxxxxxx_K_Exxxxxxxxx
TRINITY_DN103443_c0_g2_m.6843	590	K	xxxxxxxxxx_K_Exxxxxxxxx
TRINITY_DN91238_c0_g2_m.24530	58	K	xxxxxxxxxx_K_Axxxxxxxxx
TRINITY_DN94807_c0_g1_m.28268	318	K	xxxxxxxxxx_K_Gxxxxxxxxx
TRINITY_DN95718_c2_g1_m.29516	279	K	xxxxxxxxxx_K_Exxxxxxxxx
TRINITY_DN97496_c0_g1_m.32112	205	K	xxxxxxxxxx_K_Vxxxxxxxxx
TRINITY_DN91716_c0_g1_m.24975	146	K	xxxxxxxxxx_K_Vxxxxxxxxx
TRINITY_DN96669_c1_g1_m.30885	316	K	xxxxxxxxxA_K_xxxxxxxxxx
TRINITY_DN104654_c1_g1_m.9482	316	K	xxxxxxxxxA_K_xxxxxxxxxx
TRINITY_DN91288_c0_g1_m.24589	49	K	xxxxxxxxxx_K_Dxxxxxxxxx
TRINITY_DN97366_c0_g1_m.31909	135	K	xxxxxxxxxx_K_Exxxxxxxxx
TRINITY_DN100699_c0_g1_m.1283	228	K	xxxxxxxxxV_K_xxxxxxxxxx
TRINITY_DN93958_c4_g1_m.27270	189	K	xxxxxxxxxx_K_Exxxxxxxxx
TRINITY_DN95358_c0_g1_m.29001	140	K	xxxxxxxxxx_K_Exxxxxxxxx
TRINITY_DN97113_c0_g1_m.31526	365	K	xxxxxxxxxx_K_Exxxxxxxxx
TRINITY_DN97154_c0_g1_m.31582	231	K	xxxxxxxxxA_K_xxxxxxxxxx
TRINITY_DN91578_c1_g1_m.24862	95	K	xxxxxxxxxx_K_Dxxxxxxxxx
TRINITY_DN74118_c0_g1_m.18622	77	K	xxxxxxxxxV_K_xxxxxxxxxx
TRINITY_DN93043_c0_g5_m.26226	37	K	xxxxxxxxxA_K_xxxxxxxxxx
TRINITY_DN95408_c3_g1_m.29086	139	K	xxxxxxxxxx_K_Exxxxxxxxx
TRINITY_DN98799_c0_g1_m.34171	195	K	xxxxxxxxxA_K_xxxxxxxxxx
TRINITY_DN89554_c0_g1_m.23199	162	K	xxxxxxxxxx_K_Vxxxxxxxxx
TRINITY_DN99674_c1_g3_m.35628	539	K	xxxKxxxExx_K_xxxxxxxxxx
TRINITY_DN104207_c5_g1_m.8495	115	K	xxxxxxxxxx_K_xxxxExxxxx
TRINITY_DN102224_c0_g1_m.4214	707	K	xxxxxxxxxA_K_xxxxxxxxxx
TRINITY_DN102242_c0_g1_m.4247	248	K	xxxxxxxxxx_K_Axxxxxxxxx
TRINITY_DN87699_c0_g1_m.22158	143	K	xxxxxxxxxx_K_Dxxxxxxxxx
TRINITY_DN95718_c2_g1_m.29516	620	K	xxxxxxxxxA_K_xxxxxxxxxx
TRINITY_DN100955_c1_g1_m.1730	324	K	xxxxxxxxxx_K_Exxxxxxxxx
TRINITY_DN90613_c0_g1_m.24005	49	K	xxxxxxxxxx_K_Vxxxxxxxxx
TRINITY_DN99063_c1_g1_m.34602	142	K	xxxxxxxxxx_K_Exxxxxxxxx
TRINITY_DN89325_c0_g1_m.23058	11	K	xxxxxxxxxx_K_Axxxxxxxxx
TRINITY_DN96203_c0_g1_m.30200	141	K	xxxxxxxxxx_K_Exxxxxxxxx
TRINITY_DN103181_c0_g1_m.6252	302	K	xxxxxxxxxx_K_Dxxxxxxxxx
TRINITY_DN83980_c0_g1_m.20661	97	K	xxxxxxxxxx_K_xxxxExxxxx
TRINITY_DN94389_c1_g1_m.27790	613	K	xxxxxxxxxx_K_Gxxxxxxxxx
TRINITY_DN106508_c0_g1_m.12680	92	K	xxxxxxxxxx_K_Exxxxxxxxx
TRINITY_DN104081_c0_g1_m.8244	117	K	xxxxxxxxxA_K_xxxxxxxxxx
TRINITY_DN92551_c0_g1_m.25760	104	K	xxxxxxxxxx_K_Vxxxxxxxxx
TRINITY_DN98314_c0_g2_m.33420	103	K	xKxxxxxxxx_K_xxxxxxxxxx
TRINITY_DN104708_c1_g1_m.9594	359	K	xxxxxxxxxx_K_Exxxxxxxxx
TRINITY_DN104761_c0_g21_m.9710	67	K	xxxxxxxxxY_K_xxxxxxxxxx
TRINITY_DN69851_c0_g3_m.18089	55	K	xxxxxxxxxY_K_xxxxxxxxxx
TRINITY_DN91986_c0_g1_m.25205	91	K	xxxxxxxxxx_K_Exxxxxxxxx
TRINITY_DN95077_c0_g2_m.28591	50	K	xxxxxxxxxx_K_Gxxxxxxxxx
TRINITY_DN93986_c0_g1_m.27300	143	K	xxxxxxxxxV_K_xxxxxxxxxx
TRINITY_DN90292_c0_g1_m.23771	11	K	xxxxxxxxxx_K_Axxxxxxxxx
TRINITY_DN92536_c0_g1_m.25743	98	K	xxxxxxxxxx_K_Axxxxxxxxx
TRINITY_DN105288_c2_g1_m.10974	114	K	xxxxxxxxxx_K_Dxxxxxxxxx
TRINITY_DN103287_c0_g1_m.6485	899	K	xxxxxxxxxx_K_Exxxxxxxxx
TRINITY_DN72971_c0_g1_m.18457	126	K	xxxxxxxxxx_K_Exxxxxxxxx
TRINITY_DN101271_c0_g2_m.2366	15	K	xxxxxxxxxx_K_Axxxxxxxxx
TRINITY_DN92256_c0_g1_m.25468	167	K	xxxxxxxxxV_K_xxxxxxxxxx
TRINITY_DN91089_c2_g1_m.24408	73	K	xxxxxxxxxA_K_xxxxxxxxxx
TRINITY_DN82781_c0_g1_m.20269	29	K	xxxxxxxxxx_K_xxxxExxxxx
TRINITY_DN88800_c0_g1_m.22748	15	K	xKxxxxxxxx_K_xxxxxxxxxx
TRINITY_DN55749_c0_g1_m.16922	107	K	xxxxxxxxxx_K_Vxxxxxxxxx
TRINITY_DN80014_c0_g1_m.19585	169	K	xxxxxxxxxx_K_Dxxxxxxxxx
TRINITY_DN86499_c1_g2_m.21614	42	K	xxxxxxxxxx_K_Axxxxxxxxx
TRINITY_DN93026_c1_g1_m.26210	93	K	xxxxxxxxxx_K_Dxxxxxxxxx
TRINITY_DN103287_c0_g1_m.6485	458	K	xxxxxxxxxx_K_Dxxxxxxxxx
TRINITY_DN95456_c0_g1_m.29175	285	K	xxxxxxxxxA_K_xxxxxxxxxx
TRINITY_DN81786_c0_g1_m.20026	98	K	xxxxxxxxxV_K_xxxxxxxxxx
TRINITY_DN55938_c0_g1_m.16938	138	K	xxxxxxxxxx_K_Exxxxxxxxx
TRINITY_DN96849_c0_g1_m.31154	348	K	xxxxxxxxxx_K_Exxxxxxxxx
TRINITY_DN98592_c1_g2_m.33846	49	K	xKxxxxxxxx_K_xxxxxxxxxx
TRINITY_DN103771_c0_g1_m.7588	278	K	xxxxxxxxxx_K_Axxxxxxxxx
TRINITY_DN94362_c0_g1_m.27735	463	K	xxxxxxxxxx_K_Exxxxxxxxx
TRINITY_DN80410_c0_g1_m.19696	525	K	xxxxxxxxxx_K_Axxxxxxxxx
TRINITY_DN90996_c0_g2_m.24338	113	K	xxxKxxxExx_K_xxxxxxxxxx
TRINITY_DN105856_c0_g3_m.12150	97	K	xxxxxxxxxA_K_xxxxxxxxxx
TRINITY_DN100689_c3_g3_m.1267	438	K	xxxxxxxxxA_K_xxxxxxxxxx
TRINITY_DN88736_c0_g1_m.22706	269	K	xxxxxxxxxV_K_xxxxxxxxxx
TRINITY_DN104822_c1_g3_m.9885	127	K	xKxxxxxxxx_K_xxxxxxxxxx
TRINITY_DN104037_c3_g1_m.8129	751	K	xxxxxxxxxA_K_xxxxxxxxxx
TRINITY_DN89436_c0_g1_m.23135	219	K	xxxxxxxxxx_K_Exxxxxxxxx
TRINITY_DN94951_c0_g1_m.28431	275	K	xxxxxxxxxx_K_Exxxxxxxxx
TRINITY_DN100196_c0_g1_m.318	197	K	xxxxxxxxxx_K_xxxxExxxxx
TRINITY_DN104654_c1_g1_m.9481	37	K	xxxxxxxxxx_K_Vxxxxxxxxx
TRINITY_DN94812_c0_g1_m.28275	125	K	xxxxxxxxxx_K_Vxxxxxxxxx
TRINITY_DN98228_c0_g1_m.33236	384	K	xxxxxxxxxA_K_xxxxxxxxxx
TRINITY_DN91238_c0_g2_m.24530	40	K	xxxxxxxxxx_K_Axxxxxxxxx
TRINITY_DN102328_c0_g1_m.4436	116	K	xxxxxxxxxx_K_Dxxxxxxxxx
TRINITY_DN93720_c1_g1_m.26996	121	K	xxxxxxxxxx_K_Exxxxxxxxx
TRINITY_DN95152_c1_g1_m.28693	278	K	xxxxxxxxxx_K_Axxxxxxxxx
TRINITY_DN82515_c0_g1_m.20219	165	K	xxxxxxxxxV_K_xxxxxxxxxx
TRINITY_DN92064_c2_g1_m.25276	24	K	xxxxxxxxxY_K_xxxxxxxxxx
TRINITY_DN77008_c0_g1_m.19048	10	K	xxxxxxxxxx_K_Exxxxxxxxx
TRINITY_DN95358_c0_g1_m.29001	142	K	xxxxxxxxxx_K_Vxxxxxxxxx
TRINITY_DN83309_c0_g1_m.20443	425	K	xxxxxxxxxx_K_xxxxExxxxx
TRINITY_DN102080_c1_g1_m.3928	213	K	xxxxxxxxxx_K_Dxxxxxxxxx
TRINITY_DN96991_c0_g1_m.31332	82	K	xxxxxxxxxx_K_xxxxExxxxx
TRINITY_DN103752_c0_g1_m.7531	195	K	xxxxxxxxxx_K_Gxxxxxxxxx
TRINITY_DN99677_c0_g1_m.35631	642	K	xxxxxxxxxA_K_xxxxxxxxxx
TRINITY_DN99100_c0_g1_m.34657	306	K	xxxxxxxxxx_K_Vxxxxxxxxx
TRINITY_DN93759_c0_g2_m.27046	91	K	xxxxxxxxxx_K_Exxxxxxxxx
TRINITY_DN99292_c0_g1_m.34995	347	K	xxxxxxxxxx_K_Gxxxxxxxxx
TRINITY_DN105430_c5_g1_m.11282	53	K	xxxxxxxxxx_K_Dxxxxxxxxx
TRINITY_DN94862_c0_g1_m.28333	203	K	xxxxxxxxxA_K_xxxxxxxxxx
TRINITY_DN96026_c0_g1_m.29952	230	K	xxxxxxxxxY_K_xxxxxxxxxx
TRINITY_DN80640_c0_g1_m.19745	62	K	xxxxxxxxxx_K_xxxxExxxxx
TRINITY_DN92812_c0_g2_m.25989	237	K	xKxxxxxxxx_K_xxxxxxxxxx
TRINITY_DN91716_c0_g1_m.24975	209	K	xxxxxxxxxx_K_Axxxxxxxxx
TRINITY_DN91986_c0_g1_m.25205	148	K	xxxxxxxxxx_K_xxxxExxxxx
TRINITY_DN90082_c0_g1_m.23588	109	K	xxxxxxxxxx_K_Gxxxxxxxxx
TRINITY_DN96106_c0_g1_m.30040	15	K	xxxxxxxxxx_K_Exxxxxxxxx
TRINITY_DN63741_c0_g1_m.17529	243	K	xKxxxxxxxx_K_xxxxxxxxxx
TRINITY_DN101986_c0_g1_m.3723	119	K	xxxxxxxxxA_K_xxxxxxxxxx
TRINITY_DN90996_c0_g2_m.24338	235	K	xxxxxxxxxV_K_xxxxxxxxxx
TRINITY_DN80427_c0_g1_m.19699	130	K	xxxxxxxxxx_K_Vxxxxxxxxx
TRINITY_DN92372_c0_g1_m.25575	146	K	xxxxxxxxxx_K_Axxxxxxxxx
TRINITY_DN104081_c0_g1_m.8244	79	K	xxxxxxxxxx_K_Axxxxxxxxx
TRINITY_DN90996_c0_g2_m.24338	227	K	xxxxxxxxxx_K_Dxxxxxxxxx
TRINITY_DN100516_c5_g1_m.907	271	K	xxxxxxxxxx_K_Axxxxxxxxx
TRINITY_DN96106_c0_g1_m.30040	514	K	xxxKxxxExx_K_xxxxxxxxxx
TRINITY_DN91270_c0_g1_m.24571	217	K	xxxxxxxxxx_K_Gxxxxxxxxx
TRINITY_DN95962_c0_g1_m.29847	90	K	xxxxxxxxxA_K_xxxxxxxxxx
TRINITY_DN103493_c0_g1_m.6956	872	K	xxxxxxxxxx_K_Dxxxxxxxxx
TRINITY_DN92256_c0_g1_m.25468	326	K	xxxxxxxxxx_K_Gxxxxxxxxx
TRINITY_DN96355_c0_g1_m.30430	269	K	xxxxxxxxxx_K_Exxxxxxxxx
TRINITY_DN99916_c9_g2_m.36042	161	K	xxxxxxxxxx_K_Vxxxxxxxxx
TRINITY_DN100925_c0_g1_m.1685	60	K	xxxxxxxxxx_K_Axxxxxxxxx
TRINITY_DN98164_c0_g1_m.33135	357	K	xxxxxxxxxx_K_Axxxxxxxxx
TRINITY_DN91364_c1_g1_m.24671	255	K	xxxxxxxxxx_K_Axxxxxxxxx
TRINITY_DN83574_c0_g1_m.20510	171	K	xxxxxxxxxx_K_Exxxxxxxxx
TRINITY_DN95593_c0_g1_m.29362	104	K	xxxxxxxxxA_K_xxxxxxxxxx
TRINITY_DN88222_c0_g1_m.22415	237	K	xxxxxxxxxx_K_Axxxxxxxxx
TRINITY_DN96438_c0_g1_m.30539	260	K	xxxxxxxxxx_K_Exxxxxxxxx
TRINITY_DN90400_c0_g1_m.23859	163	K	xxxxxxxxxx_K_Vxxxxxxxxx
TRINITY_DN92814_c0_g1_m.25991	623	K	xxxxxxxxxx_K_xxxxExxxxx
TRINITY_DN100500_c0_g1_m.867	275	K	xxxxxxxxxx_K_Dxxxxxxxxx
TRINITY_DN95059_c0_g1_m.28566	127	K	xxxxxxxxxx_K_Dxxxxxxxxx
TRINITY_DN92782_c0_g1_m.25965	112	K	xxxxxxxxxx_K_Vxxxxxxxxx
TRINITY_DN94362_c0_g1_m.27735	629	K	xxxxxxxxxV_K_xxxxxxxxxx
TRINITY_DN98874_c1_g1_m.34289	591	K	xxxxxxxxxx_K_Exxxxxxxxx
TRINITY_DN97071_c0_g1_m.31445	26	K	xxxxxxxxxx_K_Exxxxxxxxx
TRINITY_DN104481_c0_g11_m.9096	48	K	xxxxxxxxxA_K_xxxxxxxxxx
TRINITY_DN99699_c0_g1_m.35664	91	K	xxxKxxxExx_K_xxxxxxxxxx
TRINITY_DN92170_c0_g1_m.25384	154	K	xxxxxxxxxx_K_xxxxExxxxx
TRINITY_DN95457_c0_g1_m.29177	63	K	xxxxxxxxxx_K_Exxxxxxxxx
TRINITY_DN93401_c0_g1_m.26593	644	K	xxxxxxxxxY_K_xxxxxxxxxx
TRINITY_DN98558_c0_g1_m.33798	518	K	xKxxxxxxxx_K_xxxxxxxxxx
TRINITY_DN89077_c0_g1_m.22903	60	K	xxxxxxxxxA_K_xxxxxxxxxx
TRINITY_DN99009_c0_g1_m.34525	143	K	xxxxxxxxxx_K_Exxxxxxxxx
TRINITY_DN103088_c0_g2_m.6050	224	K	xxxxxxxxxx_K_xxxxExxxxx
TRINITY_DN95379_c0_g1_m.29038	8	K	xxxxxxxxxV_K_xxxxxxxxxx
TRINITY_DN94453_c1_g2_m.27864	78	K	xKxxxxxxxx_K_xxxxxxxxxx
TRINITY_DN100617_c0_g1_m.1121	41	K	xxxxxxxxxV_K_xxxxxxxxxx
TRINITY_DN104664_c0_g9_m.9517	26	K	xxxxxxxxxx_K_xxxxExxxxx
TRINITY_DN98485_c0_g1_m.33682	205	K	xxxxxxxxxV_K_xxxxxxxxxx
TRINITY_DN90172_c0_g2_m.23664	179	K	xxxxxxxxxx_K_Exxxxxxxxx
TRINITY_DN88424_c0_g1_m.22528	15	K	xxxxxxxxxx_K_Gxxxxxxxxx
TRINITY_DN97262_c0_g1_m.31761	119	K	xxxxxxxxxx_K_Axxxxxxxxx
TRINITY_DN88339_c0_g1_m.22482	25	K	xxxKxxxExx_K_xxxxxxxxxx
TRINITY_DN93776_c0_g1_m.27066	80	K	xxxxxxxxxx_K_Exxxxxxxxx
TRINITY_DN103764_c5_g1_m.7573	227	K	xxxxxxxxxA_K_xxxxxxxxxx
TRINITY_DN84253_c0_g1_m.20747	150	K	xxxxxxxxxV_K_xxxxxxxxxx
TRINITY_DN94262_c0_g1_m.27610	358	K	xxxxxxxxxx_K_Exxxxxxxxx
TRINITY_DN99096_c0_g1_m.34648	254	K	xxxxxxxxxx_K_Exxxxxxxxx
TRINITY_DN92782_c0_g1_m.25965	107	K	xxxxxxxxxx_K_Exxxxxxxxx
TRINITY_DN91647_c1_g1_m.24911	87	K	xxxxxxxxxx_K_Gxxxxxxxxx
TRINITY_DN94951_c0_g1_m.28431	69	K	xxxxxxxxxx_K_Dxxxxxxxxx
TRINITY_DN91835_c0_g1_m.25065	153	K	xxxxxxxxxx_K_Gxxxxxxxxx
TRINITY_DN87810_c0_g1_m.22213	120	K	xxxxxxxxxV_K_xxxxxxxxxx
TRINITY_DN99674_c1_g3_m.35628	163	K	xxxxxxxxxx_K_Dxxxxxxxxx
TRINITY_DN95962_c0_g1_m.29847	357	K	xxxxxxxxxx_K_Axxxxxxxxx
TRINITY_DN76591_c0_g2_m.18968	42	K	xxxxxxxxxV_K_xxxxxxxxxx
TRINITY_DN102910_c56_g26_m.5674	255	K	xxxxxxxxxx_K_xxxxExxxxx
TRINITY_DN91110_c1_g1_m.24430	208	K	xxxxxxxxxx_K_Vxxxxxxxxx
TRINITY_DN101541_c4_g1_m.2910	413	K	xxxxxxxxxV_K_xxxxxxxxxx
TRINITY_DN98314_c0_g2_m.33420	135	K	xxxxxxxxxx_K_Exxxxxxxxx
TRINITY_DN94595_c0_g1_m.28019	85	K	xxxxxxxxxx_K_Gxxxxxxxxx
TRINITY_DN64052_c1_g1_m.17549	96	K	xxxxxxxxxV_K_xxxxxxxxxx
TRINITY_DN95369_c0_g1_m.29026	280	K	xxxxxxxxxx_K_Exxxxxxxxx
TRINITY_DN92256_c0_g1_m.25468	197	K	xxxxxxxxxV_K_xxxxxxxxxx
TRINITY_DN100541_c0_g1_m.953	357	K	xxxxxxxxxx_K_Exxxxxxxxx
TRINITY_DN98485_c0_g1_m.33682	107	K	xxxxxxxxxx_K_Exxxxxxxxx
TRINITY_DN102922_c0_g2_m.5700	361	K	xxxxxxxxxx_K_Exxxxxxxxx
TRINITY_DN94636_c0_g1_m.28074	375	K	xxxxxxxxxx_K_Gxxxxxxxxx
TRINITY_DN103144_c0_g4_m.6178	297	K	xxxxxxxxxx_K_Dxxxxxxxxx
TRINITY_DN95456_c0_g1_m.29175	73	K	xxxxxxxxxx_K_Vxxxxxxxxx
TRINITY_DN88787_c0_g1_m.22733	59	K	xxxxxxxxxx_K_Axxxxxxxxx
TRINITY_DN102080_c1_g1_m.3928	124	K	xxxxxxxxxx_K_Axxxxxxxxx
TRINITY_DN91364_c1_g1_m.24671	267	K	xxxxxxxxxx_K_Exxxxxxxxx
TRINITY_DN99827_c1_g2_m.35883	75	K	xxxxxxxxxx_K_Axxxxxxxxx
TRINITY_DN98215_c3_g14_m.33205	80	K	xxxxxxxxxx_K_Vxxxxxxxxx
TRINITY_DN91364_c1_g1_m.24671	117	K	xxxxxxxxxx_K_Gxxxxxxxxx
TRINITY_DN92615_c0_g3_m.25814	20	K	xKxxxxxxxx_K_xxxxxxxxxx
TRINITY_DN95225_c0_g1_m.28805	162	K	xxxxxxxxxx_K_Dxxxxxxxxx
TRINITY_DN104272_c6_g2_m.8627	204	K	xxxxxxxxxx_K_Gxxxxxxxxx
TRINITY_DN104794_c8_g2_m.9785	173	K	xxxxxxxxxA_K_xxxxxxxxxx
TRINITY_DN77153_c0_g1_m.19086	309	K	xxxxxxxxxx_K_xxxxExxxxx
TRINITY_DN87878_c0_g1_m.22249	188	K	xxxxxxxxxx_K_Axxxxxxxxx
TRINITY_DN97480_c1_g1_m.32093	337	K	xxxxxxxxxV_K_xxxxxxxxxx
TRINITY_DN95457_c0_g1_m.29177	421	K	xxxxxxxxxx_K_Gxxxxxxxxx
TRINITY_DN103270_c0_g1_m.6447	1547	K	xxxxxxxxxx_K_Exxxxxxxxx
TRINITY_DN96113_c0_g1_m.30053	70	K	xxxxxxxxxx_K_Exxxxxxxxx
TRINITY_DN88589_c0_g1_m.22620	54	K	xxxxxxxxxx_K_Axxxxxxxxx
TRINITY_DN79233_c0_g1_m.19427	143	K	xxxxxxxxxx_K_xxxxExxxxx
TRINITY_DN83574_c0_g1_m.20510	245	K	xxxxxxxxxV_K_xxxxxxxxxx
TRINITY_DN90397_c0_g1_m.23857	69	K	xxxxxxxxxx_K_Vxxxxxxxxx
TRINITY_DN83266_c0_g1_m.20420	312	K	xxxxxxxxxx_K_Axxxxxxxxx
TRINITY_DN103574_c1_g1_m.7152	208	K	xxxxxxxxxx_K_Exxxxxxxxx
TRINITY_DN103728_c4_g1_m.7477	413	K	xxxxxxxxxx_K_Gxxxxxxxxx
TRINITY_DN55520_c0_g1_m.16899	24	K	xxxxxxxxxx_K_Exxxxxxxxx
TRINITY_DN95012_c0_g1_m.28504	86	K	xxxxxxxxxx_K_Exxxxxxxxx
TRINITY_DN78834_c0_g3_m.19326	253	K	xxxxxxxxxx_K_Exxxxxxxxx
TRINITY_DN96669_c1_g1_m.30885	247	K	xxxxxxxxxx_K_Dxxxxxxxxx
TRINITY_DN102742_c0_g1_m.5316	81	K	xKxxxxxxxx_K_xxxxxxxxxx
TRINITY_DN99653_c2_g1_m.35593	448	K	xxxxxxxxxV_K_xxxxxxxxxx
TRINITY_DN97928_c0_g1_m.32775	252	K	xxxxxxxxxA_K_xxxxxxxxxx
TRINITY_DN98252_c0_g1_m.33281	270	K	xKxxxxxxxx_K_xxxxxxxxxx
TRINITY_DN100676_c1_g1_m.1231	254	K	xxxxxxxxxV_K_xxxxxxxxxx
TRINITY_DN97813_c0_g1_m.32590	216	K	xxxxxxxxxA_K_xxxxxxxxxx
TRINITY_DN83266_c0_g1_m.20420	266	K	xxxxxxxxxx_K_Exxxxxxxxx
TRINITY_DN102293_c5_g3_m.4358	372	K	xxxxxxxxxx_K_xxxxExxxxx
TRINITY_DN95911_c0_g1_m.29776	238	K	xxxxxxxxxx_K_Exxxxxxxxx
TRINITY_DN105712_c0_g3_m.11855	70	K	xxxxxxxxxx_K_Vxxxxxxxxx
TRINITY_DN78834_c0_g3_m.19326	249	K	xxxxxxxxxx_K_Exxxxxxxxx
TRINITY_DN102931_c0_g1_m.5722	19	K	xxxxxxxxxY_K_xxxxxxxxxx
TRINITY_DN93401_c0_g1_m.26593	431	K	xxxxxxxxxx_K_Axxxxxxxxx
TRINITY_DN95573_c0_g1_m.29325	139	K	xxxxxxxxxV_K_xxxxxxxxxx
TRINITY_DN97235_c0_g2_m.31711	15	K	xxxxxxxxxx_K_xxxxExxxxx
TRINITY_DN93015_c0_g1_m.26197	168	K	xxxxxxxxxx_K_Gxxxxxxxxx
TRINITY_DN96393_c0_g2_m.30479	97	K	xxxxxxxxxV_K_xxxxxxxxxx
TRINITY_DN102308_c0_g1_m.4391	144	K	xxxxxxxxxA_K_xxxxxxxxxx
TRINITY_DN100518_c1_g1_m.915	204	K	xxxxxxxxxx_K_Vxxxxxxxxx
TRINITY_DN94774_c1_g1_m.28226	195	K	xxxxxxxxxx_K_Exxxxxxxxx
TRINITY_DN98958_c0_g1_m.34422	261	K	xxxxxxxxxx_K_Vxxxxxxxxx
TRINITY_DN64704_c0_g1_m.17597	75	K	xxxxxxxxxA_K_xxxxxxxxxx
TRINITY_DN92056_c0_g1_m.25270	162	K	xxxxxxxxxx_K_Exxxxxxxxx
TRINITY_DN99793_c2_g1_m.35818	370	K	xKxxxxxxxx_K_xxxxxxxxxx
TRINITY_DN94862_c0_g1_m.28333	210	K	xxxxxxxxxx_K_xxxxExxxxx
TRINITY_DN97340_c0_g1_m.31865	149	K	xxxxxxxxxx_K_Vxxxxxxxxx
TRINITY_DN76851_c0_g1_m.19011	218	K	xxxxxxxxxx_K_Axxxxxxxxx
TRINITY_DN104961_c1_g2_m.10230	3	K	xxxxxxxxxV_K_xxxxxxxxxx
TRINITY_DN100617_c0_g1_m.1121	102	K	xKxxxxxxxx_K_xxxxxxxxxx
TRINITY_DN99793_c2_g1_m.35818	598	K	xxxxxxxxxx_K_Dxxxxxxxxx
TRINITY_DN102224_c0_g1_m.4214	168	K	xKxxxxxxxx_K_xxxxxxxxxx
TRINITY_DN87862_c0_g1_m.22242	74	K	xKxxxxxxxx_K_xxxxxxxxxx
TRINITY_DN95632_c0_g1_m.29413	454	K	xxxxxxxxxA_K_xxxxxxxxxx
TRINITY_DN95203_c0_g1_m.28771	361	K	xxxxxxxxxx_K_Axxxxxxxxx
TRINITY_DN97425_c0_g1_m.31997	116	K	xxxxxxxxxA_K_xxxxxxxxxx
TRINITY_DN92499_c0_g1_m.25713	201	K	xxxxxxxxxx_K_Axxxxxxxxx
TRINITY_DN97843_c0_g1_m.32632	82	K	xxxxxxxxxx_K_Vxxxxxxxxx
TRINITY_DN100196_c0_g1_m.318	207	K	xxxxxxxxxY_K_xxxxxxxxxx
TRINITY_DN96113_c0_g1_m.30053	181	K	xxxxxxxxxx_K_Vxxxxxxxxx
TRINITY_DN94389_c1_g1_m.27790	594	K	xxxxxxxxxx_K_Axxxxxxxxx
TRINITY_DN97037_c0_g1_m.31388	170	K	xxxxxxxxxx_K_Gxxxxxxxxx
TRINITY_DN99844_c0_g1_m.35916	99	K	xxxxxxxxxA_K_xxxxxxxxxx
TRINITY_DN102039_c0_g3_m.3840	185	K	xKxxxxxxxx_K_xxxxxxxxxx
TRINITY_DN94662_c0_g1_m.28114	456	K	xxxxxxxxxx_K_Exxxxxxxxx
TRINITY_DN102535_c0_g2_m.4916	232	K	xxxxxxxxxx_K_xxxxExxxxx
TRINITY_DN103287_c0_g1_m.6485	130	K	xxxxxxxxxx_K_Exxxxxxxxx
TRINITY_DN73911_c0_g1_m.18592	391	K	xxxxxxxxxx_K_Dxxxxxxxxx
TRINITY_DN90769_c0_g1_m.24141	80	K	xxxxxxxxxx_K_Axxxxxxxxx
TRINITY_DN91375_c0_g1_m.24685	54	K	xxxxxxxxxx_K_Axxxxxxxxx
TRINITY_DN94470_c0_g1_m.27881	745	K	xxxxxxxxxA_K_xxxxxxxxxx
TRINITY_DN101986_c0_g1_m.3723	249	K	xxxxxxxxxV_K_xxxxxxxxxx
TRINITY_DN72971_c0_g1_m.18457	198	K	xxxxxxxxxx_K_Vxxxxxxxxx
TRINITY_DN99793_c2_g1_m.35818	387	K	xxxxxxxxxx_K_Vxxxxxxxxx
TRINITY_DN99426_c0_g1_m.35224	280	K	xxxxxxxxxx_K_Exxxxxxxxx
TRINITY_DN90459_c0_g1_m.23908	91	K	xxxxxxxxxA_K_xxxxxxxxxx
TRINITY_DN86513_c0_g1_m.21621	117	K	xxxxxxxxxx_K_Exxxxxxxxx
TRINITY_DN97480_c1_g1_m.32093	309	K	xxxxxxxxxx_K_xxxxExxxxx
TRINITY_DN103460_c0_g1_m.6877	59	K	xxxxxxxxxx_K_Dxxxxxxxxx
TRINITY_DN91487_c0_g1_m.24772	469	K	xxxxxxxxxA_K_xxxxxxxxxx
TRINITY_DN92404_c0_g2_m.25610	188	K	xxxxxxxxxx_K_Exxxxxxxxx
TRINITY_DN105223_c2_g1_m.10826	89	K	xxxxxxxxxx_K_Dxxxxxxxxx
TRINITY_DN95663_c1_g1_m.29446	82	K	xxxxxxxxxx_K_Dxxxxxxxxx
TRINITY_DN103764_c9_g1_m.7580	212	K	xxxKxxxExx_K_xxxxxxxxxx
TRINITY_DN100526_c0_g1_m.927	250	K	xxxxxxxxxx_K_Gxxxxxxxxx
TRINITY_DN99066_c0_g1_m.34606	230	K	xxxxxxxxxx_K_Dxxxxxxxxx
TRINITY_DN98135_c0_g1_m.33100	394	K	xxxxxxxxxx_K_Dxxxxxxxxx
TRINITY_DN85598_c0_g2_m.21173	51	K	xxxxxxxxxx_K_Axxxxxxxxx
TRINITY_DN99292_c0_g1_m.34995	495	K	xxxxxxxxxx_K_Dxxxxxxxxx
TRINITY_DN95130_c0_g3_m.28664	113	K	xxxxxxxxxx_K_Exxxxxxxxx
TRINITY_DN99603_c0_g2_m.35487	403	K	xxxxxxxxxx_K_Axxxxxxxxx
TRINITY_DN91467_c1_g1_m.24747	6	K	xxxxxxxxxx_K_Axxxxxxxxx
TRINITY_DN101075_c0_g1_m.1969	395	K	xxxxxxxxxx_K_Dxxxxxxxxx
TRINITY_DN99066_c0_g1_m.34606	47	K	xxxxxxxxxx_K_Axxxxxxxxx
TRINITY_DN100098_c1_g2_m.152	535	K	xxxxxxxxxA_K_xxxxxxxxxx
TRINITY_DN80640_c0_g1_m.19745	44	K	xxxxxxxxxx_K_Exxxxxxxxx
TRINITY_DN103181_c0_g1_m.6252	694	K	xxxxxxxxxx_K_Dxxxxxxxxx
TRINITY_DN104669_c0_g1_m.9525	61	K	xxxxxxxxxx_K_Vxxxxxxxxx
TRINITY_DN104288_c5_g2_m.8671	191	K	xxxxxxxxxA_K_xxxxxxxxxx
TRINITY_DN97249_c2_g1_m.31737	507	K	xxxxxxxxxx_K_Axxxxxxxxx
TRINITY_DN95347_c0_g1_m.28988	80	K	xxxxxxxxxY_K_xxxxxxxxxx
TRINITY_DN88766_c0_g1_m.22721	195	K	xxxxxxxxxx_K_Gxxxxxxxxx
TRINITY_DN95157_c0_g1_m.28698	374	K	xxxxxxxxxA_K_xxxxxxxxxx
TRINITY_DN87299_c1_g2_m.21982	60	K	xxxxxxxxxV_K_xxxxxxxxxx
TRINITY_DN90340_c0_g1_m.23805	434	K	xKxxxxxxxx_K_xxxxxxxxxx
TRINITY_DN90476_c0_g1_m.23924	16	K	xxxxxxxxxA_K_xxxxxxxxxx
TRINITY_DN105134_c0_g1_m.10617	161	K	xxxxxxxxxx_K_Vxxxxxxxxx
TRINITY_DN103270_c0_g1_m.6447	963	K	xxxxxxxxxx_K_Vxxxxxxxxx
TRINITY_DN95897_c0_g1_m.29749	391	K	xxxxxxxxxY_K_xxxxxxxxxx
TRINITY_DN90400_c0_g1_m.23859	179	K	xxxxxxxxxx_K_Exxxxxxxxx
TRINITY_DN63741_c0_g1_m.17529	25	K	xxxxxxxxxx_K_Dxxxxxxxxx
TRINITY_DN97480_c1_g1_m.32093	626	K	xxxxxxxxxx_K_xxxxExxxxx
TRINITY_DN103612_c1_g1_m.7236	292	K	xKxxxxxxxx_K_xxxxxxxxxx
TRINITY_DN104872_c1_g1_m.10030	223	K	xxxxxxxxxx_K_Exxxxxxxxx
TRINITY_DN99832_c0_g2_m.35891	316	K	xxxxxxxxxx_K_xxxxExxxxx
TRINITY_DN105905_c12_g34_m.12294	121	K	xxxxxxxxxx_K_Axxxxxxxxx
TRINITY_DN92685_c0_g1_m.25868	158	K	xxxxxxxxxx_K_Dxxxxxxxxx
TRINITY_DN83486_c0_g1_m.20488	33	K	xxxxxxxxxx_K_Axxxxxxxxx
TRINITY_DN99573_c0_g2_m.35432	94	K	xxxxxxxxxA_K_xxxxxxxxxx
TRINITY_DN92242_c1_g1_m.25455	403	K	xxxxxxxxxx_K_Exxxxxxxxx
TRINITY_DN97470_c1_g1_m.32077	110	K	xxxxxxxxxx_K_Vxxxxxxxxx
TRINITY_DN103974_c0_g1_m.7997	158	K	xxxxxxxxxx_K_Vxxxxxxxxx
TRINITY_DN78834_c0_g3_m.19326	271	K	xxxxxxxxxx_K_Axxxxxxxxx
TRINITY_DN99603_c0_g2_m.35487	62	K	xxxxxxxxxx_K_xxxxExxxxx
TRINITY_DN92499_c0_g1_m.25713	198	K	xxxxxxxxxx_K_Vxxxxxxxxx
TRINITY_DN87266_c0_g1_m.21965	39	K	xxxxxxxxxx_K_xxxxExxxxx
TRINITY_DN83582_c0_g2_m.20512	174	K	xxxxxxxxxA_K_xxxxxxxxxx
TRINITY_DN81693_c0_g1_m.20003	48	K	xxxxxxxxxx_K_Axxxxxxxxx
TRINITY_DN89659_c0_g1_m.23268	135	K	xxxxxxxxxx_K_Gxxxxxxxxx
TRINITY_DN98620_c0_g3_m.33880	252	K	xxxxxxxxxx_K_Axxxxxxxxx
TRINITY_DN11192_c0_g2_m.13091	108	K	xxxxxxxxxV_K_xxxxxxxxxx
TRINITY_DN103771_c0_g1_m.7588	169	K	xxxxxxxxxx_K_Gxxxxxxxxx
TRINITY_DN88711_c0_g1_m.22691	71	K	xxxxxxxxxx_K_xxxxExxxxx
TRINITY_DN95495_c2_g1_m.29219	119	K	xxxxxxxxxY_K_xxxxxxxxxx
TRINITY_DN101441_c1_g1_m.2702	10	K	xxxxxxxxxx_K_Exxxxxxxxx
TRINITY_DN99674_c2_g1_m.35629	304	K	xxxxxxxxxx_K_Dxxxxxxxxx
TRINITY_DN100835_c0_g1_m.1521	664	K	xxxxxxxxxx_K_Exxxxxxxxx
TRINITY_DN69851_c0_g3_m.18089	123	K	xxxxxxxxxx_K_Vxxxxxxxxx
TRINITY_DN85915_c0_g1_m.21317	120	K	xxxxxxxxxx_K_Exxxxxxxxx
TRINITY_DN98929_c0_g1_m.34378	162	K	xxxxxxxxxV_K_xxxxxxxxxx
TRINITY_DN87916_c0_g1_m.22279	178	K	xxxxxxxxxA_K_xxxxxxxxxx
TRINITY_DN84161_c0_g1_m.20721	134	K	xxxxxxxxxx_K_Axxxxxxxxx
TRINITY_DN95671_c6_g1_m.29456	92	K	xxxxxxxxxx_K_Vxxxxxxxxx
TRINITY_DN88766_c0_g1_m.22721	62	K	xxxxxxxxxx_K_Gxxxxxxxxx
TRINITY_DN99526_c1_g1_m.35368	300	K	xxxxxxxxxx_K_Gxxxxxxxxx
TRINITY_DN88918_c2_g1_m.22825	392	K	xxxxxxxxxx_K_Vxxxxxxxxx
TRINITY_DN90799_c0_g1_m.24169	195	K	xxxxxxxxxx_K_Exxxxxxxxx
TRINITY_DN92242_c1_g1_m.25455	87	K	xKxxxxxxxx_K_xxxxxxxxxx
TRINITY_DN99710_c0_g1_m.35681	418	K	xxxxxxxxxY_K_xxxxxxxxxx
TRINITY_DN91404_c0_g1_m.24700	246	K	xxxxxxxxxx_K_Axxxxxxxxx
TRINITY_DN98473_c0_g2_m.33674	596	K	xxxxxxxxxx_K_Dxxxxxxxxx
TRINITY_DN103538_c1_g1_m.7071	144	K	xxxxxxxxxx_K_Vxxxxxxxxx
TRINITY_DN55749_c0_g1_m.16922	178	K	xxxxxxxxxx_K_Axxxxxxxxx
TRINITY_DN93054_c1_g1_m.26234	277	K	xxxxxxxxxx_K_Vxxxxxxxxx
TRINITY_DN92302_c0_g1_m.25516	96	K	xxxxxxxxxx_K_Dxxxxxxxxx
TRINITY_DN83309_c0_g1_m.20443	502	K	xxxxxxxxxx_K_Axxxxxxxxx
TRINITY_DN86237_c0_g1_m.21484	117	K	xxxxxxxxxY_K_xxxxxxxxxx
TRINITY_DN98681_c0_g1_m.33978	232	K	xxxxxxxxxx_K_Dxxxxxxxxx
TRINITY_DN97480_c0_g2_m.32092	16	K	xxxxxxxxxx_K_Exxxxxxxxx
TRINITY_DN105325_c0_g1_m.11046	682	K	xxxxxxxxxx_K_Vxxxxxxxxx
TRINITY_DN89983_c0_g4_m.23490	74	K	xxxxxxxxxA_K_xxxxxxxxxx
TRINITY_DN92074_c0_g2_m.25288	23	K	xxxxxxxxxx_K_Vxxxxxxxxx
TRINITY_DN27637_c0_g1_m.15649	47	K	xxxxxxxxxx_K_Gxxxxxxxxx
TRINITY_DN92720_c0_g1_m.25905	492	K	xxxxxxxxxx_K_Exxxxxxxxx
TRINITY_DN96203_c0_g1_m.30200	195	K	xxxxxxxxxA_K_xxxxxxxxxx
TRINITY_DN99526_c1_g1_m.35368	326	K	xxxxxxxxxA_K_xxxxxxxxxx
TRINITY_DN101011_c6_g1_m.1843	396	K	xxxxxxxxxx_K_Dxxxxxxxxx
TRINITY_DN88729_c0_g1_m.22703	23	K	xxxxxxxxxx_K_Gxxxxxxxxx
TRINITY_DN99664_c2_g1_m.35601	80	K	xxxxxxxxxx_K_Dxxxxxxxxx
TRINITY_DN94362_c0_g1_m.27735	266	K	xxxxxxxxxx_K_Gxxxxxxxxx
TRINITY_DN97006_c0_g1_m.31350	16	K	xKxxxxxxxx_K_xxxxxxxxxx
TRINITY_DN93054_c1_g1_m.26234	198	K	xxxxxxxxxx_K_Axxxxxxxxx
TRINITY_DN86442_c0_g2_m.21581	64	K	xxxxxxxxxV_K_xxxxxxxxxx
TRINITY_DN100197_c1_g2_m.321	105	K	xxxxxxxxxx_K_Exxxxxxxxx
TRINITY_DN93053_c0_g2_m.26233	179	K	xxxxxxxxxx_K_Dxxxxxxxxx
TRINITY_DN104961_c1_g2_m.10230	310	K	xxxxxxxxxx_K_Dxxxxxxxxx
TRINITY_DN92499_c0_g1_m.25713	615	K	xxxxxxxxxx_K_Vxxxxxxxxx
TRINITY_DN103466_c0_g1_m.6888	750	K	xxxxxxxxxx_K_Gxxxxxxxxx
TRINITY_DN88609_c0_g1_m.22630	54	K	xxxxxxxxxx_K_Vxxxxxxxxx
TRINITY_DN88729_c0_g1_m.22703	21	K	xxxxxxxxxx_K_Vxxxxxxxxx
TRINITY_DN97288_c0_g1_m.31794	163	K	xxxxxxxxxx_K_Gxxxxxxxxx
TRINITY_DN94923_c0_g1_m.28402	65	K	xxxxxxxxxx_K_Axxxxxxxxx
TRINITY_DN73380_c0_g1_m.18524	106	K	xxxxxxxxxx_K_Axxxxxxxxx
TRINITY_DN99793_c2_g1_m.35818	562	K	xxxxxxxxxx_K_Exxxxxxxxx
TRINITY_DN1448_c0_g1_m.15205	74	K	xxxxxxxxxx_K_Exxxxxxxxx
TRINITY_DN64261_c0_g2_m.17573	66	K	xxxxxxxxxx_K_Vxxxxxxxxx
TRINITY_DN90340_c0_g1_m.23805	80	K	xxxxxxxxxx_K_xxxxExxxxx
TRINITY_DN83309_c0_g1_m.20443	221	K	xxxxxxxxxx_K_Dxxxxxxxxx
TRINITY_DN95820_c0_g1_m.29646	332	K	xxxxxxxxxx_K_Dxxxxxxxxx
TRINITY_DN96225_c0_g2_m.30239	238	K	xxxKxxxExx_K_xxxxxxxxxx
TRINITY_DN98577_c3_g1_m.33821	289	K	xxxxxxxxxx_K_Exxxxxxxxx
TRINITY_DN102553_c0_g4_m.4950	314	K	xxxxxxxxxx_K_Exxxxxxxxx
TRINITY_DN95475_c0_g1_m.29199	248	K	xxxxxxxxxx_K_Axxxxxxxxx
TRINITY_DN99674_c1_g3_m.35628	530	K	xxxKxxxExx_K_xxxxxxxxxx
TRINITY_DN84142_c0_g1_m.20714	110	K	xxxxxxxxxx_K_Dxxxxxxxxx
TRINITY_DN92879_c0_g2_m.26063	26	K	xxxxxxxxxx_K_Dxxxxxxxxx
TRINITY_DN98000_c1_g1_m.32899	188	K	xxxxxxxxxx_K_Axxxxxxxxx
TRINITY_DN89275_c0_g1_m.23022	241	K	xxxxxxxxxx_K_Gxxxxxxxxx
TRINITY_DN99674_c0_g1_m.35626	132	K	xxxxxxxxxx_K_Exxxxxxxxx
TRINITY_DN104961_c1_g2_m.10230	628	K	xxxxxxxxxx_K_Dxxxxxxxxx
TRINITY_DN99942_c1_g2_m.36084	236	K	xxxKxxxExx_K_xxxxxxxxxx
TRINITY_DN103485_c0_g2_m.6939	695	K	xxxxxxxxxx_K_Gxxxxxxxxx
TRINITY_DN102080_c1_g1_m.3928	104	K	xxxxxxxxxA_K_xxxxxxxxxx
TRINITY_DN103291_c0_g1_m.6496	47	K	xxxxxxxxxA_K_xxxxxxxxxx
TRINITY_DN99808_c1_g1_m.35853	184	K	xxxKxxxExx_K_xxxxxxxxxx
TRINITY_DN60984_c0_g1_m.17279	78	K	xxxxxxxxxV_K_xxxxxxxxxx
TRINITY_DN96743_c10_g1_m.30998	22	K	xxxxxxxxxA_K_xxxxxxxxxx
TRINITY_DN90641_c0_g1_m.24034	445	K	xKxxxxxxxx_K_xxxxxxxxxx
TRINITY_DN98282_c0_g1_m.33347	261	K	xxxxxxxxxx_K_xxxxExxxxx
TRINITY_DN102240_c0_g1_m.4244	278	K	xxxxxxxxxx_K_Exxxxxxxxx
TRINITY_DN104961_c1_g2_m.10230	471	K	xxxxxxxxxx_K_Exxxxxxxxx
TRINITY_DN104961_c1_g2_m.10230	496	K	xxxxxxxxxx_K_Vxxxxxxxxx
TRINITY_DN105113_c0_g1_m.10566	151	K	xxxxxxxxxx_K_Vxxxxxxxxx
TRINITY_DN101648_c0_g1_m.3129	36	K	xxxxxxxxxY_K_xxxxxxxxxx
TRINITY_DN95661_c0_g2_m.29443	18	K	xKxxxxxxxx_K_xxxxxxxxxx
TRINITY_DN101319_c6_g1_m.2455	339	K	xKxxxxxxxx_K_xxxxxxxxxx
TRINITY_DN83544_c0_g1_m.20500	20	K	xxxxxxxxxV_K_xxxxxxxxxx
TRINITY_DN100541_c0_g1_m.953	251	K	xxxxxxxxxY_K_xxxxxxxxxx
TRINITY_DN100838_c7_g2_m.1523	260	K	xxxxxxxxxx_K_Exxxxxxxxx
TRINITY_DN99681_c0_g1_m.35635	47	K	xxxxxxxxxx_K_Dxxxxxxxxx
TRINITY_DN92256_c0_g1_m.25468	330	K	xxxxxxxxxx_K_Gxxxxxxxxx
TRINITY_DN83219_c0_g2_m.20398	90	K	xxxxxxxxxA_K_xxxxxxxxxx
TRINITY_DN94862_c0_g1_m.28333	88	K	xxxxxxxxxA_K_xxxxxxxxxx
TRINITY_DN90642_c0_g1_m.24036	197	K	xxxxxxxxxA_K_xxxxxxxxxx
TRINITY_DN92499_c0_g1_m.25713	632	K	xxxxxxxxxx_K_Dxxxxxxxxx
TRINITY_DN92007_c0_g1_m.25222	140	K	xxxxxxxxxY_K_xxxxxxxxxx
TRINITY_DN105856_c0_g3_m.12150	99	K	xxxxxxxxxx_K_Exxxxxxxxx
TRINITY_DN93720_c1_g1_m.26996	196	K	xKxxxxxxxx_K_xxxxxxxxxx
TRINITY_DN93031_c0_g1_m.26213	306	K	xxxxxxxxxx_K_Dxxxxxxxxx
TRINITY_DN86891_c0_g2_m.21790	199	K	xKxxxxxxxx_K_xxxxxxxxxx
TRINITY_DN94951_c0_g1_m.28431	544	K	xxxxxxxxxx_K_Dxxxxxxxxx
TRINITY_DN99066_c0_g1_m.34606	12	K	xxxxxxxxxx_K_Exxxxxxxxx
TRINITY_DN80915_c0_g1_m.19802	249	K	xxxxxxxxxx_K_Axxxxxxxxx
TRINITY_DN98485_c0_g1_m.33682	85	K	xxxxxxxxxV_K_xxxxxxxxxx
TRINITY_DN103639_c0_g1_m.7301	66	K	xxxxxxxxxx_K_Vxxxxxxxxx
TRINITY_DN98215_c3_g14_m.33205	34	K	xxxxxxxxxx_K_Exxxxxxxxx
TRINITY_DN95507_c1_g1_m.29232	354	K	xxxxxxxxxx_K_Exxxxxxxxx
TRINITY_DN100046_c0_g1_m.79	445	K	xxxxxxxxxx_K_Vxxxxxxxxx
TRINITY_DN99215_c2_g1_m.34853	138	K	xxxxxxxxxV_K_xxxxxxxxxx
TRINITY_DN103199_c1_g1_m.6297	221	K	xxxxxxxxxx_K_Axxxxxxxxx
TRINITY_DN101773_c0_g1_m.3352	257	K	xxxxxxxxxx_K_Axxxxxxxxx
TRINITY_DN95043_c2_g1_m.28543	424	K	xxxxxxxxxx_K_xxxxExxxxx
TRINITY_DN92233_c0_g1_m.25449	286	K	xKxxxxxxxx_K_xxxxxxxxxx
TRINITY_DN93972_c0_g1_m.27285	227	K	xxxxxxxxxA_K_xxxxxxxxxx
TRINITY_DN95013_c0_g1_m.28505	747	K	xxxxxxxxxV_K_xxxxxxxxxx
TRINITY_DN96884_c0_g1_m.31191	327	K	xxxxxxxxxx_K_Axxxxxxxxx
TRINITY_DN100541_c0_g1_m.953	732	K	xKxxxxxxxx_K_xxxxxxxxxx
TRINITY_DN94818_c0_g8_m.28285	153	K	xxxxxxxxxx_K_Dxxxxxxxxx
TRINITY_DN52453_c0_g1_m.16720	79	K	xKxxxxxxxx_K_xxxxxxxxxx
TRINITY_DN105911_c8_g2_m.12314	247	K	xxxxxxxxxx_K_Gxxxxxxxxx
TRINITY_DN103764_c9_g1_m.7580	95	K	xxxxxxxxxx_K_Gxxxxxxxxx
TRINITY_DN95776_c0_g1_m.29594	275	K	xxxxxxxxxx_K_xxxxExxxxx
TRINITY_DN95586_c2_g1_m.29351	91	K	xxxxxxxxxx_K_Exxxxxxxxx
TRINITY_DN63741_c0_g1_m.17529	39	K	xxxxxxxxxx_K_Dxxxxxxxxx
TRINITY_DN99905_c0_g1_m.36022	105	K	xxxxxxxxxx_K_Gxxxxxxxxx
TRINITY_DN104085_c0_g2_m.8254	148	K	xxxxxxxxxx_K_Exxxxxxxxx
TRINITY_DN88351_c0_g1_m.22489	142	K	xxxxxxxxxx_K_Exxxxxxxxx
TRINITY_DN79311_c0_g1_m.19445	110	K	xxxxxxxxxx_K_Axxxxxxxxx
TRINITY_DN92242_c1_g1_m.25455	710	K	xxxxxxxxxx_K_Axxxxxxxxx
TRINITY_DN100689_c3_g3_m.1267	318	K	xxxxxxxxxx_K_Dxxxxxxxxx
TRINITY_DN91248_c2_g2_m.24540	68	K	xxxxxxxxxx_K_Exxxxxxxxx
TRINITY_DN92430_c0_g1_m.25636	28	K	xxxxxxxxxx_K_Dxxxxxxxxx
TRINITY_DN103144_c0_g4_m.6178	340	K	xxxxxxxxxV_K_xxxxxxxxxx
TRINITY_DN89554_c0_g1_m.23199	164	K	xKxxxxxxxx_K_xxxxxxxxxx
TRINITY_DN83653_c0_g1_m.20532	248	K	xxxxxxxxxV_K_xxxxxxxxxx
TRINITY_DN73715_c0_g1_m.18577	127	K	xKxxxxxxxx_K_xxxxxxxxxx
TRINITY_DN88684_c0_g1_m.22672	574	K	xxxxxxxxxx_K_Exxxxxxxxx
TRINITY_DN83309_c0_g1_m.20443	212	K	xxxxxxxxxx_K_Vxxxxxxxxx
TRINITY_DN90967_c0_g1_m.24323	172	K	xxxxxxxxxx_K_Vxxxxxxxxx
TRINITY_DN105098_c2_g8_m.10531	124	K	xxxxxxxxxA_K_xxxxxxxxxx
TRINITY_DN102902_c3_g1_m.5664	89	K	xxxxxxxxxx_K_Dxxxxxxxxx
TRINITY_DN91668_c0_g1_m.24931	162	K	xKxxxxxxxx_K_xxxxxxxxxx
TRINITY_DN96823_c0_g1_m.31121	364	K	xxxxxxxxxx_K_Vxxxxxxxxx
TRINITY_DN93306_c0_g1_m.26499	271	K	xxxxxxxxxx_K_Vxxxxxxxxx
TRINITY_DN94008_c0_g1_m.27326	70	K	xxxxxxxxxx_K_Vxxxxxxxxx
TRINITY_DN97928_c0_g1_m.32775	153	K	xxxxxxxxxx_K_Vxxxxxxxxx
TRINITY_DN102564_c0_g1_m.4983	148	K	xxxxxxxxxx_K_Gxxxxxxxxx
TRINITY_DN95610_c0_g1_m.29381	395	K	xxxxxxxxxx_K_xxxxExxxxx
TRINITY_DN94272_c0_g1_m.27621	591	K	xxxxxxxxxx_K_Exxxxxxxxx
TRINITY_DN90251_c0_g1_m.23745	170	K	xxxxxxxxxx_K_Vxxxxxxxxx
TRINITY_DN92242_c1_g1_m.25455	478	K	xxxxxxxxxx_K_Axxxxxxxxx
TRINITY_DN99793_c2_g1_m.35818	640	K	xxxxxxxxxx_K_Exxxxxxxxx
TRINITY_DN93615_c0_g10_m.26862	643	K	xxxxxxxxxx_K_Axxxxxxxxx
TRINITY_DN92907_c0_g1_m.26099	550	K	xKxxxxxxxx_K_xxxxxxxxxx
TRINITY_DN99650_c0_g1_m.35583	156	K	xxxxxxxxxx_K_Dxxxxxxxxx
TRINITY_DN99793_c2_g1_m.35818	150	K	xxxxxxxxxx_K_Dxxxxxxxxx
TRINITY_DN97737_c0_g1_m.32460	306	K	xxxxxxxxxx_K_xxxxExxxxx
TRINITY_DN128853_c0_g1_m.14381	127	K	xxxxxxxxxx_K_Exxxxxxxxx
TRINITY_DN96487_c0_g1_m.30615	334	K	xxxxxxxxxx_K_Dxxxxxxxxx
TRINITY_DN99241_c0_g1_m.34895	106	K	xKxxxxxxxx_K_xxxxxxxxxx
TRINITY_DN90797_c0_g1_m.24168	341	K	xxxxxxxxxx_K_Axxxxxxxxx
TRINITY_DN100377_c0_g1_m.647	219	K	xxxxxxxxxx_K_Dxxxxxxxxx
TRINITY_DN92120_c0_g1_m.25332	304	K	xKxxxxxxxx_K_xxxxxxxxxx
TRINITY_DN95895_c0_g2_m.29743	171	K	xxxxxxxxxx_K_xxxxExxxxx
TRINITY_DN89321_c0_g1_m.23055	504	K	xKxxxxxxxx_K_xxxxxxxxxx
TRINITY_DN95459_c0_g1_m.29179	28	K	xxxxxxxxxx_K_Dxxxxxxxxx
TRINITY_DN99315_c1_g1_m.35034	191	K	xxxxxxxxxA_K_xxxxxxxxxx
TRINITY_DN95363_c0_g1_m.29006	411	K	xxxxxxxxxx_K_Exxxxxxxxx
TRINITY_DN102910_c56_g26_m.5674	326	K	xxxxxxxxxx_K_Gxxxxxxxxx
TRINITY_DN96698_c6_g2_m.30924	22	K	xxxxxxxxxA_K_xxxxxxxxxx
TRINITY_DN87878_c0_g1_m.22249	110	K	xxxxxxxxxx_K_Dxxxxxxxxx
TRINITY_DN93776_c0_g1_m.27066	70	K	xxxxxxxxxA_K_xxxxxxxxxx
TRINITY_DN99681_c0_g1_m.35635	143	K	xxxxxxxxxx_K_Axxxxxxxxx
TRINITY_DN99573_c0_g2_m.35432	440	K	xxxxxxxxxx_K_Axxxxxxxxx
TRINITY_DN95077_c0_g2_m.28591	129	K	xKxxxxxxxx_K_xxxxxxxxxx
TRINITY_DN93615_c0_g10_m.26862	85	K	xxxxxxxxxx_K_Exxxxxxxxx
TRINITY_DN89321_c0_g1_m.23055	387	K	xxxxxxxxxA_K_xxxxxxxxxx
TRINITY_DN97835_c0_g1_m.32618	263	K	xxxxxxxxxx_K_Exxxxxxxxx
TRINITY_DN95475_c0_g1_m.29199	207	K	xxxxxxxxxV_K_xxxxxxxxxx
TRINITY_DN93054_c1_g1_m.26234	256	K	xxxxxxxxxx_K_Vxxxxxxxxx
TRINITY_DN99292_c0_g1_m.34995	47	K	xxxxxxxxxx_K_Gxxxxxxxxx
TRINITY_DN95642_c0_g1_m.29422	223	K	xxxxxxxxxA_K_xxxxxxxxxx
TRINITY_DN93790_c1_g1_m.27085	406	K	xxxxxxxxxx_K_Axxxxxxxxx
TRINITY_DN83139_c0_g1_m.20368	11	K	xxxxxxxxxx_K_Dxxxxxxxxx
TRINITY_DN75655_c0_g1_m.18814	43	K	xxxxxxxxxx_K_Axxxxxxxxx
TRINITY_DN92358_c0_g1_m.25565	87	K	xxxxxxxxxx_K_Dxxxxxxxxx
TRINITY_DN103612_c1_g1_m.7236	372	K	xxxxxxxxxx_K_Exxxxxxxxx
TRINITY_DN86513_c0_g1_m.21621	210	K	xxxxxxxxxx_K_Dxxxxxxxxx
TRINITY_DN93650_c0_g1_m.26906	286	K	xxxxxxxxxY_K_xxxxxxxxxx
TRINITY_DN101313_c4_g1_m.2434	31	K	xxxxxxxxxx_K_Dxxxxxxxxx
TRINITY_DN93918_c0_g1_m.27224	81	K	xxxxxxxxxV_K_xxxxxxxxxx
TRINITY_DN101648_c0_g1_m.3129	46	K	xxxxxxxxxx_K_Gxxxxxxxxx
TRINITY_DN86365_c0_g1_m.21537	130	K	xxxxxxxxxx_K_xxxxExxxxx
TRINITY_DN91520_c0_g1_m.24806	117	K	xxxxxxxxxx_K_Axxxxxxxxx
TRINITY_DN99096_c0_g1_m.34648	134	K	xxxxxxxxxA_K_xxxxxxxxxx
TRINITY_DN95369_c0_g1_m.29026	96	K	xxxxxxxxxx_K_Gxxxxxxxxx
TRINITY_DN92170_c0_g1_m.25384	223	K	xxxxxxxxxx_K_Axxxxxxxxx
TRINITY_DN80569_c0_g1_m.19724	350	K	xxxxxxxxxA_K_xxxxxxxxxx
TRINITY_DN101913_c0_g1_m.3598	394	K	xxxxxxxxxx_K_Exxxxxxxxx
TRINITY_DN94636_c0_g1_m.28074	367	K	xxxxxxxxxA_K_xxxxxxxxxx
TRINITY_DN88736_c0_g1_m.22706	381	K	xxxxxxxxxx_K_Dxxxxxxxxx
TRINITY_DN94453_c1_g2_m.27864	206	K	xxxxxxxxxx_K_xxxxExxxxx
TRINITY_DN96383_c0_g1_m.30461	343	K	xxxxxxxxxA_K_xxxxxxxxxx
TRINITY_DN92964_c0_g1_m.26151	242	K	xxxxxxxxxx_K_Axxxxxxxxx
TRINITY_DN102019_c0_g1_m.3788	31	K	xxxxxxxxxx_K_Gxxxxxxxxx
TRINITY_DN100616_c1_g1_m.1117	191	K	xxxKxxxExx_K_xxxxxxxxxx
TRINITY_DN92372_c0_g3_m.25578	60	K	xxxxxxxxxx_K_Exxxxxxxxx
TRINITY_DN86234_c0_g1_m.21482	67	K	xxxKxxxExx_K_xxxxxxxxxx
TRINITY_DN100046_c0_g1_m.79	945	K	xxxxxxxxxx_K_Axxxxxxxxx
TRINITY_DN100752_c1_g1_m.1377	478	K	xxxxxxxxxx_K_Vxxxxxxxxx
TRINITY_DN93031_c0_g1_m.26213	222	K	xxxxxxxxxx_K_xxxxExxxxx
TRINITY_DN86891_c0_g2_m.21790	93	K	xxxxxxxxxx_K_Gxxxxxxxxx
TRINITY_DN97208_c0_g2_m.31666	23	K	xxxKxxxExx_K_xxxxxxxxxx
TRINITY_DN83574_c0_g1_m.20510	144	K	xxxxxxxxxx_K_Dxxxxxxxxx
TRINITY_DN106262_c0_g1_m.12661	109	K	xxxxxxxxxx_K_Dxxxxxxxxx
TRINITY_DN98282_c0_g1_m.33347	386	K	xxxxxxxxxx_K_xxxxExxxxx
TRINITY_DN92256_c0_g1_m.25468	82	K	xKxxxxxxxx_K_xxxxxxxxxx
TRINITY_DN94338_c0_g1_m.27710	134	K	xxxxxxxxxx_K_Gxxxxxxxxx
TRINITY_DN96114_c0_g1_m.30054	148	K	xxxxxxxxxx_K_Axxxxxxxxx
TRINITY_DN101283_c1_g1_m.2388	645	K	xxxxxxxxxx_K_Dxxxxxxxxx
TRINITY_DN100882_c0_g1_m.1611	148	K	xxxxxxxxxY_K_xxxxxxxxxx
TRINITY_DN99674_c1_g3_m.35628	513	K	xKxxxxxxxx_K_xxxxxxxxxx
TRINITY_DN93790_c1_g1_m.27085	346	K	xxxxxxxxxA_K_xxxxxxxxxx
TRINITY_DN90416_c1_g1_m.23871	156	K	xxxxxxxxxx_K_Axxxxxxxxx
TRINITY_DN97862_c2_g1_m.32668	216	K	xxxxxxxxxx_K_Gxxxxxxxxx
TRINITY_DN96319_c0_g1_m.30377	84	K	xxxxxxxxxA_K_xxxxxxxxxx
TRINITY_DN92520_c0_g1_m.25730	79	K	xxxxxxxxxx_K_Gxxxxxxxxx
TRINITY_DN98314_c0_g2_m.33420	20	K	xxxxxxxxxx_K_Axxxxxxxxx
TRINITY_DN96400_c0_g1_m.30487	596	K	xxxxxxxxxA_K_xxxxxxxxxx
TRINITY_DN96743_c10_g1_m.30998	67	K	xxxxxxxxxx_K_Axxxxxxxxx
TRINITY_DN89321_c0_g1_m.23055	191	K	xxxxxxxxxx_K_Axxxxxxxxx
TRINITY_DN103307_c0_g15_m.6526	28	K	xxxxxxxxxA_K_xxxxxxxxxx
TRINITY_DN92162_c0_g1_m.25376	155	K	xxxxxxxxxx_K_Vxxxxxxxxx
TRINITY_DN94470_c0_g1_m.27881	238	K	xxxxxxxxxx_K_Gxxxxxxxxx
TRINITY_DN95130_c0_g3_m.28664	58	K	xxxxxxxxxA_K_xxxxxxxxxx
TRINITY_DN53197_c0_g1_m.16763	188	K	xKxxxxxxxx_K_xxxxxxxxxx
TRINITY_DN88730_c0_g1_m.22704	167	K	xxxxxxxxxx_K_Dxxxxxxxxx
TRINITY_DN91216_c0_g1_m.24512	120	K	xKxxxxxxxx_K_xxxxxxxxxx
TRINITY_DN79311_c0_g1_m.19445	168	K	xxxxxxxxxx_K_Axxxxxxxxx
TRINITY_DN78180_c0_g2_m.19215	178	K	xxxxxxxxxA_K_xxxxxxxxxx
TRINITY_DN98503_c0_g2_m.33705	490	K	xxxxxxxxxx_K_xxxxExxxxx
TRINITY_DN100081_c0_g1_m.121	535	K	xKxxxxxxxx_K_xxxxxxxxxx
TRINITY_DN95593_c0_g1_m.29362	122	K	xxxxxxxxxx_K_Vxxxxxxxxx
TRINITY_DN88462_c0_g1_m.22559	208	K	xKxxxxxxxx_K_xxxxxxxxxx
TRINITY_DN93986_c0_g1_m.27300	515	K	xKxxxxxxxx_K_xxxxxxxxxx
TRINITY_DN93776_c0_g1_m.27066	43	K	xxxxxxxxxx_K_Exxxxxxxxx
TRINITY_DN87936_c0_g1_m.22285	136	K	xxxxxxxxxx_K_Exxxxxxxxx
TRINITY_DN95292_c0_g2_m.28911	214	K	xxxxxxxxxx_K_Axxxxxxxxx
TRINITY_DN104761_c0_g19_m.9708	58	K	xxxxxxxxxA_K_xxxxxxxxxx
TRINITY_DN99808_c1_g1_m.35853	153	K	xxxxxxxxxA_K_xxxxxxxxxx
TRINITY_DN92615_c0_g2_m.25813	11	K	xxxxxxxxxx_K_Exxxxxxxxx
TRINITY_DN56510_c0_g1_m.16971	151	K	xxxxxxxxxV_K_xxxxxxxxxx
TRINITY_DN99597_c1_g1_m.35472	340	K	xxxxxxxxxx_K_Vxxxxxxxxx
TRINITY_DN100950_c0_g1_m.1717	160	K	xxxxxxxxxx_K_Gxxxxxxxxx
TRINITY_DN90416_c1_g1_m.23871	150	K	xxxxxxxxxx_K_Vxxxxxxxxx
TRINITY_DN94529_c0_g1_m.27959	368	K	xxxxxxxxxV_K_xxxxxxxxxx
TRINITY_DN75140_c0_g1_m.18753	194	K	xxxxxxxxxx_K_Dxxxxxxxxx
TRINITY_DN99710_c0_g1_m.35681	501	K	xxxxxxxxxA_K_xxxxxxxxxx
TRINITY_DN91746_c0_g1_m.24994	34	K	xxxxxxxxxA_K_xxxxxxxxxx
TRINITY_DN89436_c0_g1_m.23135	177	K	xKxxxxxxxx_K_xxxxxxxxxx
TRINITY_DN104983_c2_g2_m.10276	747	K	xKxxxxxxxx_K_xxxxxxxxxx
TRINITY_DN100617_c0_g1_m.1121	68	K	xxxxxxxxxx_K_Gxxxxxxxxx
TRINITY_DN90996_c0_g2_m.24338	214	K	xxxxxxxxxx_K_Dxxxxxxxxx
TRINITY_DN95203_c0_g1_m.28771	324	K	xxxxxxxxxx_K_Exxxxxxxxx
TRINITY_DN99516_c1_g1_m.35350	555	K	xxxxxxxxxx_K_Vxxxxxxxxx
TRINITY_DN102460_c1_g1_m.4730	296	K	xKxxxxxxxx_K_xxxxxxxxxx
TRINITY_DN96496_c1_g2_m.30631	111	K	xxxxxxxxxx_K_Gxxxxxxxxx
TRINITY_DN91364_c1_g1_m.24671	130	K	xxxxxxxxxx_K_Dxxxxxxxxx
TRINITY_DN98681_c0_g1_m.33978	241	K	xKxxxxxxxx_K_xxxxxxxxxx
TRINITY_DN97379_c5_g2_m.31932	70	K	xxxxxxxxxx_K_Axxxxxxxxx
TRINITY_DN92499_c0_g1_m.25713	134	K	xxxxxxxxxV_K_xxxxxxxxxx
TRINITY_DN102593_c2_g1_m.5034	105	K	xxxxxxxxxx_K_Exxxxxxxxx
TRINITY_DN95596_c0_g1_m.29364	246	K	xxxxxxxxxV_K_xxxxxxxxxx
TRINITY_DN63741_c0_g1_m.17529	21	K	xxxxxxxxxx_K_Axxxxxxxxx
TRINITY_DN88727_c0_g1_m.22702	345	K	xxxxxxxxxx_K_Vxxxxxxxxx
TRINITY_DN100128_c1_g1_m.206	22	K	xxxxxxxxxx_K_Exxxxxxxxx
TRINITY_DN88918_c1_g1_m.22823	83	K	xxxxxxxxxx_K_Exxxxxxxxx
TRINITY_DN99315_c1_g1_m.35034	65	K	xKxxxxxxxx_K_xxxxxxxxxx
[truncated: 1,138 more rows]
