# Supplementary material for: Qualitative Proteome-Wide Analysis Reveals the Diverse Functions of Lysine Crotonylation in Dendrobium huoshanense
Source: Front Plant Sci. 2022 Feb 16;13:822374. doi: 10.3389/fpls.2022.822374 (PMC8888884; doi:10.3389/fpls.2022.822374)
Supplement: Supplementary file 6 [file Table_5.XLSX]

## Sheet: Carbon fixation in photosynthet
Index	Query Item	Preferred Name	Sites	StringId	Identity	Bitscore	Annotation
1	TRINITY_DN87654_c0_g1	XP_008805982.1	2	42345.XP_008805982.1	90	399.1	Phosphoglycerate kinase, cytosolic
2	TRINITY_DN77153_c0_g1	LOC103705497	4	42345.XP_008787446.1	82.7	738	Malate dehydrogenase [NADP] 1, chloroplastic isoform X1
3	TRINITY_DN95226_c0_g2	LOC103706299	1	42345.XP_008788584.1	84.6	700.3	Phosphoribulokinase, chloroplastic
4	TRINITY_DN96287_c0_g1	LOC103695602	12	42345.XP_008775192.1	90.8	645.2	Belongs to the class I fructose-bisphosphate aldolase family
5	TRINITY_DN86269_c0_g1	LOC103724317	4	42345.XP_008813762.1	90.7	1783.1	Phosphoenolpyruvate carboxylase 2-like isoform X1
6	TRINITY_DN98368_c0_g1	LOC103702613	3	42345.XP_008783332.1	82.3	877.9	Alanine aminotransferase 2
7	TRINITY_DN102553_c0_g4	LOC103722531	1	42345.XP_008811337.1	77.9	627.1	Belongs to the FBPase class 1 family.
8	TRINITY_DN99755_c0_g1	LOC103718721	3	42345.XP_008805887.1	85.9	582.8	Malate dehydrogenase, mitochondrial-like
9	TRINITY_DN116059_c0_g1	LOC103721989	8	42345.XP_008810613.1	64.2	166.8	Triosephosphate isomerase, cytosolic
10	TRINITY_DN91797_c0_g1	LOC103713371	1	42345.XP_008798491.1	86.3	423.7	Probable ribose-5-phosphate isomerase 3, chloroplastic
11	TRINITY_DN88222_c0_g1	LOC103718268	5	42345.XP_008805220.1	92.2	607.1	Malate dehydrogenase-like
12	TRINITY_DN99096_c0_g1	XP_008805983.1	8	42345.XP_008805983.1	85.6	792.7	Phosphoglycerate kinase, cytosolic-like
13	TRINITY_DN63502_c0_g1	LOC103719573	15	42345.XP_008807113.1	77.8	288.9	RuBisCO catalyzes two reactions: the carboxylation of D- ribulose 1,5-bisphosphate, the primary event in carbon dioxide fixation, as well as the oxidative fragmentation of the pentose substrate. Both reactions occur simultaneously and in competition at the same active site
14	TRINITY_DN103789_c5_g2	LOC103710102	6	42345.XP_008793939.1	88.5	616.3	Belongs to the FBPase class 1 family.
15	TRINITY_DN97066_c1_g1	LOC103723066	7	42345.XP_008812088.1	89	1730.3	SCAR-like protein 2
16	TRINITY_DN97843_c0_g1	LOC103706860	4	42345.XP_008789337.1	84.3	773.9	Derived by automated computational analysis using gene prediction method: Gnomon. Supporting evidence includes similarity to: 14 ESTs, 27 Proteins, and 100% coverage of the annotated genomic feature by RNAseq alignments, including 18 samples with support for all annotated introns
17	TRINITY_DN89516_c1_g1	LOC103698943	5	42345.XP_008779215.1	87.9	606.3	Malate dehydrogenase, glyoxysomal-like isoform X1
18	TRINITY_DN96051_c0_g1	LOC103714060	11	42345.XP_008799414.1	79.7	468.8	Triosephosphate isomerase, chloroplastic-like
19	TRINITY_DN99526_c1_g1	LOC103704929	3	42345.XP_008786670.1	85.2	756.5	Belongs to the glyceraldehyde-3-phosphate dehydrogenase family
20	TRINITY_DN100516_c2_g1	LOC103701278	7	42345.XP_008781507.1	86.5	171.4	Belongs to the class I fructose-bisphosphate aldolase family
21	TRINITY_DN51048_c0_g1	LOC108511071	8	42345.XP_008811716.1	86.4	676	Probable fructose-bisphosphate aldolase 3, chloroplastic
22	TRINITY_DN100270_c1_g1	LOC103712115	6	42345.XP_008796751.1	87.7	841.3	Derived by automated computational analysis using gene prediction method: Gnomon. Supporting evidence includes similarity to: 17 Proteins, and 100% coverage of the annotated genomic feature by RNAseq alignments, including 10 samples with support for all annotated introns
23	TRINITY_DN98876_c1_g1	LOC103716396	2	42345.XP_008802594.1	80.7	642.5	Malate dehydrogenase, chloroplastic-like isoform X1
24	TRINITY_DN95962_c0_g1	LOC103707141	3	42345.XP_008789746.1	89.2	896.7	Derived by automated computational analysis using gene prediction method: Gnomon. Supporting evidence includes similarity to: 15 Proteins, and 100% coverage of the annotated genomic feature by RNAseq alignments, including 4 samples with support for all annotated introns
25	TRINITY_DN96669_c1_g1	LOC103704063	6	42345.XP_008785431.1	81.2	638.6	Sedoheptulose-1,7-bisphosphatase, chloroplastic
26	TRINITY_DN94453_c1_g2	XP_008805982.1	5	42345.XP_008805982.1	89.8	699.1	Phosphoglycerate kinase, cytosolic
27	TRINITY_DN95363_c0_g1	LOC103723776	18	42345.XP_008813030.1	86.4	1305.4	Transketolase, chloroplastic
28	TRINITY_DN99916_c9_g2	LOC103710577	14	42345.XP_008794578.1	86.2	397.5	Belongs to the ribulose-phosphate 3-epimerase family.
29	TRINITY_DN63741_c0_g1	XP_008780264.1	1	42345.XP_008780264.1	90.4	101.7	Ribulose bisphosphate carboxylase large chain
30	TRINITY_DN94470_c0_g1	LOC103710937	20	42345.XP_008795093.1	84.7	1525.4	Pyruvate, phosphate dikinase, chloroplastic
31	TRINITY_DN95043_c2_g2	LOC103721894	17	42345.XP_008810493.1	75.6	492.7	NADP-dependent malic enzyme
32	TRINITY_DN88317_c0_g1	LOC103717112	13	42345.XP_008803597.1	71.8	261.9	RuBisCO catalyzes two reactions: the carboxylation of D- ribulose 1,5-bisphosphate, the primary event in carbon dioxide fixation, as well as the oxidative fragmentation of the pentose substrate. Both reactions occur simultaneously and in competition at the same active site
33	TRINITY_DN91364_c1_g1	LOC103714477	1	42345.XP_008799964.1	89	610.5	Belongs to the glyceraldehyde-3-phosphate dehydrogenase family
34	TRINITY_DN97282_c0_g1	LOC103704635	17	42345.XP_008786222.1	86.6	827.8	NAD-dependent malic enzyme 62 kDa isoform, mitochondrial

## Sheet: Proteasome
Index	Query Item	Preferred Name	Sites	StringId	Identity	Bitscore	Annotation
1	TRINITY_DN92741_c0_g1	LOC103719270	3	42345.XP_008806650.1	85.4	1402.5	26S proteasome non-ATPase regulatory subunit 2 homolog A-like
2	TRINITY_DN100201_c1_g1	LOC103718470	1	42345.XP_008805536.1	69.6	2446.8	The sequence of the model RefSeq protein was modified relative to its source genomic sequence to represent the inferred CDS: inserted 1 base in 1 codon
3	TRINITY_DN95601_c0_g1	LOC103700880	2	42345.XP_008780998.1	78.1	443.7	26S proteasome non-ATPase regulatory subunit 4 homolog
4	TRINITY_DN102299_c3_g1	LOC103721146	1	42345.XP_008809439.1	83.3	510	Probable 26S proteasome non-ATPase regulatory subunit 3
6	TRINITY_DN100000_c0_g1	LOC103707096	4	42345.XP_008789683.1	97.8	850.1	Belongs to the AAA ATPase family.
7	TRINITY_DN95827_c0_g1	LOC103722419	2	42345.XP_008811199.1	94	436.4	The proteasome is a multicatalytic proteinase complex which is characterized by its ability to cleave peptides with Arg, Phe, Tyr, Leu, and Glu adjacent to the leaving group at neutral or slightly basic pH
8	TRINITY_DN82781_c0_g1	LOC103712963	3	42345.XP_008797908.1	87.9	757.7	Derived by automated computational analysis using gene prediction method: Gnomon. Supporting evidence includes similarity to: 5 ESTs, 15 Proteins, and 99% coverage of the annotated genomic feature by RNAseq alignments, including 16 samples with support for all annotated introns
9	TRINITY_DN102600_c0_g1	LOC103709302	2	42345.XP_008792808.1	95	738.4	Belongs to the AAA ATPase family.
10	TRINITY_DN101077_c3_g1	LOC103702253	4	42345.XP_008782808.1	84.8	171	Acts as a regulatory subunit of the 26S proteasome which is involved in the ATP-dependent degradation of ubiquitinated proteins.
11	TRINITY_DN95525_c0_g1	LOC103705967	1	42345.XP_008788111.1	93.6	762.7	Belongs to the AAA ATPase family.
12	TRINITY_DN94819_c0_g1	LOC103720468	5	42345.XP_008808403.1	93.2	453.8	Proteasome subunit alpha type-7 isoform X1
13	TRINITY_DN83861_c0_g1	LOC103718985	3	42345.XP_008806245.1	87.4	481.1	The proteasome is a multicatalytic proteinase complex which is characterized by its ability to cleave peptides with Arg, Phe, Tyr, Leu, and Glu adjacent to the leaving group at neutral or slightly basic pH
14	TRINITY_DN96498_c0_g1	LOC103722970	5	42345.XP_008811958.1	91.6	474.9	The proteasome is a multicatalytic proteinase complex which is characterized by its ability to cleave peptides with Arg, Phe, Tyr, Leu, and Glu adjacent to the leaving group at neutral or slightly basic pH
15	TRINITY_DN99315_c1_g1	LOC103708657	4	42345.XP_008791916.1	90.1	738.8	26S proteasome non-ATPase regulatory subunit 11 homolog
16	TRINITY_DN94424_c0_g1	LOC103718432	2	42345.XP_008805479.1	84.8	654.1	26S proteasome non-ATPase regulatory subunit 13 homolog B-like
17	TRINITY_DN11192_c0_g2	LOC103700800	4	42345.XP_008780884.1	98.1	842.8	Belongs to the AAA ATPase family.
18	TRINITY_DN95593_c0_g1	LOC103697396	4	42345.XP_008777464.1	88.3	666.8	26S proteasome non-ATPase regulatory subunit 6
19	TRINITY_DN91703_c1_g1	LOC103703742	2	42345.XP_008784923.1	87.6	433	The proteasome is a multicatalytic proteinase complex which is characterized by its ability to cleave peptides with Arg, Phe, Tyr, Leu, and Glu adjacent to the leaving group at neutral or slightly basic pH
20	TRINITY_DN92099_c0_g1	LOC103710835	4	42345.XP_008794958.1	94.4	459.9	The proteasome is a multicatalytic proteinase complex which is characterized by its ability to cleave peptides with Arg, Phe, Tyr, Leu, and Glu adjacent to the leaving group at neutral or slightly basic pH
21	TRINITY_DN86513_c0_g1	LOC103704051	6	42345.XP_008785408.1	92.6	560.8	26S proteasome non-ATPase regulatory subunit 7 homolog A isoform X1
22	TRINITY_DN89446_c1_g1	LOC103717402	2	42345.XP_008803997.1	88.2	409.5	The proteasome is a multicatalytic proteinase complex which is characterized by its ability to cleave peptides with Arg, Phe, Tyr, Leu, and Glu adjacent to the leaving group at neutral or slightly basic pH
23	TRINITY_DN95347_c0_g1	LOC103703652	2	42345.XP_008784796.1	93.1	392.5	The proteasome is a multicatalytic proteinase complex which is characterized by its ability to cleave peptides with Arg, Phe, Tyr, Leu, and Glu adjacent to the leaving group at neutral or slightly basic pH
24	TRINITY_DN90721_c0_g1	LOC103713129	1	42345.XP_008798167.1	88.9	421	The proteasome is a multicatalytic proteinase complex which is characterized by its ability to cleave peptides with Arg, Phe, Tyr, Leu, and Glu adjacent to the leaving group at neutral or slightly basic pH
26	TRINITY_DN104481_c0_g11	LOC103708800	5	42345.XP_008792112.1	96.3	618.6	Belongs to the AAA ATPase family.
27	TRINITY_DN83486_c0_g1	LOC103702167	7	42345.XP_008782714.1	95.5	476.1	The proteasome is a multicatalytic proteinase complex which is characterized by its ability to cleave peptides with Arg, Phe, Tyr, Leu, and Glu adjacent to the leaving group at neutral or slightly basic pH
28	TRINITY_DN88657_c0_g1	LOC103710407	5	42345.XP_008794325.1	96.9	728	Belongs to the AAA ATPase family.
29	TRINITY_DN92404_c0_g1	LOC103695528	1	42345.XP_008775110.1	90.8	365.5	The proteasome is a multicatalytic proteinase complex which is characterized by its ability to cleave peptides with Arg, Phe, Tyr, Leu, and Glu adjacent to the leaving group at neutral or slightly basic pH
30	TRINITY_DN87721_c0_g1	LOC103723329	3	42345.XP_008812435.1	89	500.7	The proteasome is a multicatalytic proteinase complex which is characterized by its ability to cleave peptides with Arg, Phe, Tyr, Leu, and Glu adjacent to the leaving group at neutral or slightly basic pH

## Sheet: Pentose phosphate pathway
Index	Query Item	preferred Name	Sites	StringId	Identity	Bitscore	Annotation
1	TRINITY_DN102041_c0_g2	LOC103718504	9	42345.XP_008805585.1	88.1	987.3	Pyrophosphate--fructose 6-phosphate 1-phosphotransferase subunit beta
2	TRINITY_DN97208_c0_g2	LOC103702710	3	42345.XP_008783474.1	84.5	983	Belongs to the GPI family
3	TRINITY_DN99566_c0_g1	LOC103702794	1	42345.XP_008783581.1	82.8	1028.5	Phosphoglucomutase, chloroplastic
4	TRINITY_DN94784_c0_g1	LOC103710219	3	42345.XP_008794084.1	84.7	807.7	Catalyzes the phosphorylation of D-fructose 6-phosphate to fructose 1,6-bisphosphate by ATP, the first committing step of glycolysis
5	TRINITY_DN100882_c0_g1	LOC103711718	8	42345.XP_008796200.1	87.7	940.3	Pyrophosphate--fructose 6-phosphate 1-phosphotransferase subunit alpha
6	TRINITY_DN100516_c2_g1	LOC103701278	8	42345.XP_008781507.1	86.5	171.4	Belongs to the class I fructose-bisphosphate aldolase family
7	TRINITY_DN99753_c1_g2	LOC103695832	1	42345.XP_008775478.1	77.1	218	Regulatory subunit of pyrophosphate--fructose 6-phosphate 1- phosphotransferase
8	TRINITY_DN95379_c0_g1	LOC103696103	1	42345.XP_008775853.1	73.8	413.3	Belongs to the glucosamine/galactosamine-6-phosphate isomerase family. 6-phosphogluconolactonase subfamily.
9	TRINITY_DN51048_c0_g1	LOC108511071	6	42345.XP_008811716.1	86.4	676	Probable fructose-bisphosphate aldolase 3, chloroplastic
10	TRINITY_DN90642_c0_g1	LOC103697961	6	42345.XP_008778133.1	82.7	698.4	Uncharacterized protein LOC103697961
11	TRINITY_DN94951_c0_g1	LOC103701107	9	42345.XP_008781306.1	86.6	1026.5	Belongs to the phosphohexose mutase family.
12	TRINITY_DN96287_c0_g1	LOC103695602	12	42345.XP_008775192.1	90.8	645.2	Belongs to the class I fructose-bisphosphate aldolase family
13	TRINITY_DN102553_c0_g4	LOC103722531	1	42345.XP_008811337.1	77.9	627.1	Belongs to the FBPase class 1 family.
14	TRINITY_DN97689_c0_g1	LOC103722058	2	42345.XP_008810711.1	69.6	351.3	Belongs to the glucosamine/galactosamine-6-phosphate isomerase family. 6-phosphogluconolactonase subfamily.
15	TRINITY_DN99100_c0_g1	LOC103717122	11	42345.XP_008803614.1	91.9	905.6	Catalyzes the oxidative decarboxylation of 6-phosphogluconate to ribulose 5-phosphate and CO(2), with concomitant reduction of NADP to NADPH
16	TRINITY_DN92242_c1_g1	LOC103723776	5	42345.XP_008813030.1	86.3	1305.4	Transketolase, chloroplastic
17	TRINITY_DN105223_c2_g1	LOC103714234	8	42345.XP_008799641.1	91.3	931.8	Belongs to the aldehyde dehydrogenase family.
18	TRINITY_DN91797_c0_g1	LOC103713371	5	42345.XP_008798491.1	86.3	423.7	Probable ribose-5-phosphate isomerase 3, chloroplastic
19	TRINITY_DN92383_c0_g1	LOC103718335	3	42345.XP_008805334.1	87.8	870.2	Belongs to the 6-phosphogluconate dehydrogenase family.
20	TRINITY_DN99916_c9_g2	LOC103710577	1	42345.XP_008794578.1	86.2	397.5	Belongs to the ribulose-phosphate 3-epimerase family.
21	TRINITY_DN103789_c5_g2	LOC103710102	4	42345.XP_008793939.1	88.5	616.3	Belongs to the FBPase class 1 family.
22	TRINITY_DN80879_c0_g1	LOC103710713	4	42345.XP_008794812.1	78.7	625.5	Derived by automated computational analysis using gene prediction method: Gnomon. Supporting evidence includes similarity to: 7 Proteins, and 100% coverage of the annotated genomic feature by RNAseq alignments, including 7 samples with support for all annotated introns
23	TRINITY_DN101438_c0_g1	LOC103722295	1	42345.XP_008811018.1	84.7	1038.1	Belongs to the GPI family
24	TRINITY_DN90641_c0_g1	LOC103698768	2	42345.XP_008779034.1	79.2	743.8	ATP-dependent 6-phosphofructokinase 2-like
25	TRINITY_DN86137_c0_g1	LOC103708842	6	42345.XP_008792156.1	84.3	901	Catalyzes the rate-limiting step of the oxidative pentose- phosphate pathway, which represents a route for the dissimilation of carbohydrates besides glycolysis
