# Supplementary material for: Qualitative Proteome-Wide Analysis Reveals the Diverse Functions of Lysine Crotonylation in Dendrobium huoshanense
Source: Front Plant Sci. 2022 Feb 16;13:822374. doi: 10.3389/fpls.2022.822374 (PMC8888884; doi:10.3389/fpls.2022.822374)
Supplement: Supplementary file 7 [file Table_6.XLSX]

## Sheet: conserved proteins
Dendrobium huoshanense	Dendranthema grandiforum		D. huoshanense	Nicotiana tabacum		D. huoshanense	Oryza sativa		D. huoshanense	Camellia sinensis						Dendranthema grandiforum	Oryza sativa	Nicotiana tabacum	Camellia sinensis
TRINITY_DN100000_c0_g1_m.1	Cluster-2961.147894		TRINITY_DN100025_c1_g9_m.49	P25998		TRINITY_DN100000_c0_g1_m.1	Q0D3E0		TRINITY_DN100000_c0_g1_m.1	CSA012449.1						1199	690	637	971
TRINITY_DN100025_c1_g9_m.49	Cluster-2961.147800		TRINITY_DN100036_c0_g1_m.69	F6N7C2		TRINITY_DN100025_c1_g9_m.49	C7J7G4		TRINITY_DN100025_c1_g9_m.49	CSA021446.1				D. huoshanense	1591	728	515	496	774
TRINITY_DN100032_c1_g3_m.64	Cluster-2961.156876		TRINITY_DN100080_c0_g1_m.120	Q7X998		TRINITY_DN100036_c0_g1_m.69	Q7XB60		TRINITY_DN100046_c0_g1_m.79	CSA015996.1						471	175	141	197
TRINITY_DN100046_c0_g1_m.79	Cluster-2961.144279		TRINITY_DN100123_c0_g1_m.199	T2BRU8		TRINITY_DN100046_c0_g1_m.79	Q0DAZ7		TRINITY_DN100080_c0_g1_m.120	CSA017430.1						863	1076	1095	817
TRINITY_DN100080_c0_g1_m.120	Cluster-2961.134208		TRINITY_DN100126_c0_g1_m.201	Q6IVK6		TRINITY_DN100064_c0_g1_m.96	Q7XPW1		TRINITY_DN100081_c0_g1_m.121	CSA009205.1
TRINITY_DN100123_c0_g1_m.199	Cluster-2961.148551		TRINITY_DN100156_c5_g1_m.262	A0A077DCK3		TRINITY_DN100080_c0_g1_m.120	Q8GTK8		TRINITY_DN100082_c2_g1_m.124	CSA015055.1
TRINITY_DN100126_c0_g1_m.201	Cluster-2961.173484		TRINITY_DN100181_c0_g1_m.296	P27495		TRINITY_DN100081_c0_g1_m.121	Q6ZDY8		TRINITY_DN100110_c0_g2_m.171	CSA028170.1
TRINITY_DN100181_c0_g1_m.296	Cluster-2961.147823		TRINITY_DN100196_c0_g1_m.318	Q9SLN8		TRINITY_DN100110_c0_g2_m.171	Q0DRY8		TRINITY_DN100123_c0_g1_m.199	CSA018098.1
TRINITY_DN100196_c0_g1_m.318	Cluster-2961.156217		TRINITY_DN100329_c0_g2_m.571	C3PTS5		TRINITY_DN100126_c0_g1_m.201	Q9AUV6		TRINITY_DN100126_c0_g1_m.201	CSA010797.1
TRINITY_DN100270_c1_g1_m.453	Cluster-2961.276077		TRINITY_DN100340_c1_g1_m.591	P93769		TRINITY_DN100340_c1_g1_m.591	Q10QZ6		TRINITY_DN100127_c0_g1_m.202	CSA032441.1
TRINITY_DN100340_c1_g1_m.591	Cluster-2961.151830		TRINITY_DN100355_c2_g1_m.611	A0A0S0N610		TRINITY_DN100516_c5_g1_m.907	Q40677		TRINITY_DN100156_c5_g1_m.262	CSA025656.1
TRINITY_DN100355_c2_g1_m.611	Cluster-2961.168951		TRINITY_DN100516_c5_g1_m.907	F2VJ75		TRINITY_DN100526_c0_g1_m.927	Q5VR43		TRINITY_DN100181_c0_g1_m.296	CSA035910.1
TRINITY_DN100377_c0_g1_m.647	Cluster-2961.110583		TRINITY_DN100585_c1_g1_m.1061	Q75ZE0		TRINITY_DN100541_c0_g1_m.953	Q9AQZ5		TRINITY_DN100196_c0_g1_m.318	CSA004286.1
TRINITY_DN100471_c1_g1_m.808	Cluster-2961.168886		TRINITY_DN100616_c1_g1_m.1117	A1KYB1		TRINITY_DN100581_c0_g1_m.1039	Q0IXT4		TRINITY_DN100329_c0_g2_m.571	CSA009895.1
TRINITY_DN100516_c5_g1_m.907	Cluster-2961.275601		TRINITY_DN100617_c0_g1_m.1121	Q40567		TRINITY_DN100585_c1_g1_m.1061	Q6ZKC0		TRINITY_DN100340_c1_g1_m.591	CSA001667.1
TRINITY_DN100541_c0_g1_m.953	Cluster-2961.158549		TRINITY_DN100642_c1_g1_m.1168	Q9AVG7		TRINITY_DN100590_c3_g2_m.1072	Q8SA06		TRINITY_DN100377_c0_g1_m.647	CSA023089.1
TRINITY_DN100581_c0_g1_m.1039	Cluster-2961.173508		TRINITY_DN100654_c2_g1_m.1189	L8B431		TRINITY_DN100642_c1_g1_m.1168	Q6K683		TRINITY_DN100431_c0_g1_m.747	CSA015390.1
TRINITY_DN100585_c1_g1_m.1061	Cluster-2961.147891		TRINITY_DN100689_c3_g3_m.1267	P93769		TRINITY_DN100754_c0_g2_m.1384	Q84SC5		TRINITY_DN100485_c0_g1_m.839	CSA011621.1
TRINITY_DN100590_c3_g2_m.1072	Cluster-2961.158241		TRINITY_DN100752_c1_g1_m.1377	P50218		TRINITY_DN100835_c0_g1_m.1521	Q8LIX8		TRINITY_DN100491_c0_g1_m.854	CSA009154.1
TRINITY_DN100650_c4_g2_m.1181	Cluster-2961.129707		TRINITY_DN100838_c7_g2_m.1523	G9MD87		TRINITY_DN100838_c7_g2_m.1523	Q0D9G9		TRINITY_DN100500_c0_g1_m.867	CSA032253.1
TRINITY_DN100650_c4_g2_m.1182	Cluster-2961.145129		TRINITY_DN100885_c2_g3_m.1615	Q75XU8		TRINITY_DN100988_c0_g2_m.1794	Q0IZQ4		TRINITY_DN100505_c0_g1_m.878	CSA015562.1
TRINITY_DN100654_c2_g1_m.1189	Cluster-2961.126285		TRINITY_DN100999_c1_g1_m.1813	Q67BD0		TRINITY_DN101011_c6_g1_m.1843	Q7F280		TRINITY_DN100512_c0_g12_m.890	CSA020590.1
TRINITY_DN100689_c3_g3_m.1267	Cluster-2961.151830		TRINITY_DN101011_c6_g1_m.1843	P50218		TRINITY_DN101071_c1_g1_m.1963	Q7XZW1		TRINITY_DN100512_c0_g4_m.891	CSA020590.1
TRINITY_DN100711_c0_g2_m.1302	Cluster-2961.154872		TRINITY_DN101271_c0_g2_m.2366	D4P3S0		TRINITY_DN101283_c1_g1_m.2388	Q9AUR8		TRINITY_DN100516_c5_g1_m.907	CSA009966.1
TRINITY_DN100713_c0_g1_m.1307	Cluster-2961.91719		TRINITY_DN101354_c0_g2_m.2518	B6VRE8		TRINITY_DN101313_c4_g1_m.2434	Q5WN02		TRINITY_DN100541_c0_g1_m.953	CSA011619.1
TRINITY_DN100752_c1_g1_m.1377	Cluster-2961.184277		TRINITY_DN101419_c5_g1_m.2655	Q9SLN8		TRINITY_DN101325_c2_g5_m.2467	Q0J709		TRINITY_DN100581_c0_g1_m.1039	CSA007056.1
TRINITY_DN100838_c7_g2_m.1523	Cluster-2961.137417		TRINITY_DN101443_c1_g2_m.2706	A0A075F1U0		TRINITY_DN101367_c0_g1_m.2542	Q5ZA31		TRINITY_DN100585_c1_g1_m.1061	CSA030173.1
TRINITY_DN100885_c2_g3_m.1615	Cluster-2961.147891		TRINITY_DN101499_c1_g1_m.2832	A0A076KXA0		TRINITY_DN101426_c1_g1_m.2666	Q7EZB9		TRINITY_DN100616_c1_g1_m.1117	CSA004426.1
TRINITY_DN100988_c0_g2_m.1794	Cluster-2961.112038		TRINITY_DN101541_c4_g1_m.2910	W8SRJ8		TRINITY_DN101641_c0_g1_m.3119	Q6K822		TRINITY_DN100617_c0_g1_m.1121	CSA018083.1
TRINITY_DN100999_c1_g1_m.1813	Cluster-2961.258637		TRINITY_DN101600_c1_g1_m.3027	Q9FEL1		TRINITY_DN101672_c0_g2_m.3170	Q6ZI49		TRINITY_DN100642_c1_g1_m.1168	CSA032657.1
TRINITY_DN101011_c6_g1_m.1843	Cluster-2961.184277		TRINITY_DN101626_c2_g6_m.3096	Q40581		TRINITY_DN101730_c0_g15_m.3274	Q9FW37		TRINITY_DN100689_c3_g3_m.1267	CSA001667.1
TRINITY_DN101075_c0_g1_m.1969	Cluster-2961.87639		TRINITY_DN101641_c0_g1_m.3119	A0A077DBL2		TRINITY_DN101995_c0_g1_m.3740	Q2R1C1		TRINITY_DN100752_c1_g1_m.1377	CSA036554.1
TRINITY_DN101077_c2_g1_m.1974	Cluster-10466.0		TRINITY_DN101648_c0_g1_m.3129	G5ELZ2		TRINITY_DN102019_c0_g1_m.3788	Q6Z510		TRINITY_DN100754_c0_g2_m.1384	CSA002229.1
TRINITY_DN101103_c1_g2_m.2021	Cluster-2961.145713		TRINITY_DN101725_c1_g1_m.3268	Q42955		TRINITY_DN102080_c1_g1_m.3928	Q0J8G4		TRINITY_DN100763_c0_g1_m.1391	CSA026673.1
TRINITY_DN101113_c0_g1_m.2042	Cluster-2961.122808		TRINITY_DN101773_c0_g1_m.3352	V9TLK1		TRINITY_DN102126_c0_g1_m.4011	Q7XPR2		TRINITY_DN100838_c7_g2_m.1523	CSA020674.1
TRINITY_DN101258_c0_g1_m.2338	Cluster-2961.209760		TRINITY_DN101893_c3_g2_m.3561	Q0PWS5		TRINITY_DN102168_c1_g1_m.4094	Q53QG1		TRINITY_DN100885_c2_g3_m.1615	CSA003078.1
TRINITY_DN101261_c2_g1_m.2346	Cluster-2961.178135		TRINITY_DN101913_c0_g1_m.3598	A0A076KWG4		TRINITY_DN102258_c4_g4_m.4275	Q69VC8		TRINITY_DN100950_c0_g1_m.1717	CSA032868.1
TRINITY_DN101283_c1_g1_m.2388	Cluster-2961.217263		TRINITY_DN101986_c0_g1_m.3723	Q84UH4		TRINITY_DN102274_c10_g2_m.4304	Q7FAM9		TRINITY_DN100999_c1_g1_m.1813	CSA000963.1
TRINITY_DN101367_c0_g1_m.2542	Cluster-2961.191189		TRINITY_DN102004_c0_g1_m.3758	Q9ZPL5		TRINITY_DN102308_c0_g1_m.4391	Q0JMH0		TRINITY_DN101011_c6_g1_m.1843	CSA036554.1
TRINITY_DN101406_c0_g1_m.2618	Cluster-2961.161012		TRINITY_DN102018_c0_g1_m.3783	A9XG41		TRINITY_DN102469_c0_g1_m.4757	Q10PV6		TRINITY_DN101077_c2_g1_m.1974	CSA026902.1
TRINITY_DN101407_c0_g1_m.2619	Cluster-2961.159023		TRINITY_DN102019_c0_g1_m.3788	P06357		TRINITY_DN102523_c1_g1_m.4888	Q94I35		TRINITY_DN101113_c0_g1_m.2042	CSA009713.1
TRINITY_DN101419_c5_g1_m.2655	Cluster-2961.156217		TRINITY_DN102039_c0_g3_m.3840	P40691		TRINITY_DN102535_c0_g2_m.4916	Q657P0		TRINITY_DN101162_c3_g1_m.2140	CSA005915.1
TRINITY_DN101426_c1_g1_m.2666	Cluster-2961.120727		TRINITY_DN102041_c0_g2_m.3846	A7XV37		TRINITY_DN102553_c0_g4_m.4950	Q10NK0		TRINITY_DN101271_c0_g2_m.2366	CSA014396.1
TRINITY_DN101438_c0_g1_m.2694	Cluster-2961.227523		TRINITY_DN102080_c1_g1_m.3928	A0A068JCD7		TRINITY_DN102593_c2_g1_m.5034	C7J2C3		TRINITY_DN101313_c4_g1_m.2434	CSA034290.1
TRINITY_DN101499_c1_g1_m.2832	Cluster-2961.156876		TRINITY_DN102258_c4_g4_m.4275	P06411		TRINITY_DN102605_c0_g3_m.5060	Q60EI0		TRINITY_DN101325_c2_g5_m.2467	CSA020068.1
TRINITY_DN101511_c0_g1_m.2846	Cluster-2961.151884		TRINITY_DN102274_c10_g2_m.4304	O82702		TRINITY_DN102663_c3_g1_m.5161	Q6F385		TRINITY_DN101354_c0_g2_m.2518	CSA023469.1
TRINITY_DN101541_c4_g1_m.2910	Cluster-2961.151916		TRINITY_DN102299_c3_g1_m.4368	P93768		TRINITY_DN102766_c0_g2_m.5370	Q7XLG5		TRINITY_DN101419_c5_g1_m.2655	CSA004286.1
TRINITY_DN101600_c1_g1_m.3027	Cluster-2961.173508		TRINITY_DN102303_c4_g2_m.4372	Q5XMB8		TRINITY_DN102790_c0_g1_m.5426	Q0J4Y4		TRINITY_DN101450_c0_g1_m.2721	CSA022105.1
TRINITY_DN101626_c2_g6_m.3096	Cluster-2961.151830		TRINITY_DN102337_c5_g3_m.4456	O82077		TRINITY_DN102807_c3_g4_m.5462	Q6ZFU6		TRINITY_DN101499_c1_g1_m.2832	CSA015989.1
TRINITY_DN101639_c0_g1_m.3117	Cluster-2961.147501		TRINITY_DN102422_c0_g1_m.4640	Q04065		TRINITY_DN102851_c1_g1_m.5549	Q0DVX8		TRINITY_DN101541_c4_g1_m.2910	CSA009600.1
TRINITY_DN101641_c0_g1_m.3119	Cluster-2961.148806		TRINITY_DN102535_c0_g2_m.4915	Q5XMB8		TRINITY_DN102931_c0_g1_m.5722	Q93VT8		TRINITY_DN101639_c0_g1_m.3117	CSA033070.1
TRINITY_DN101643_c4_g1_m.3120	Cluster-2961.115629		TRINITY_DN102553_c0_g4_m.4950	A0A068JCD2		TRINITY_DN102942_c0_g1_m.5737	Q67G20		TRINITY_DN101641_c0_g1_m.3119	CSA000531.1
TRINITY_DN101725_c1_g1_m.3268	Cluster-2961.47359		TRINITY_DN102585_c2_g1_m.5022	Q8W402		TRINITY_DN103071_c1_g6_m.6030	Q948T6		TRINITY_DN101648_c0_g1_m.3129	CSA016706.1
TRINITY_DN101773_c0_g1_m.3352	Cluster-2961.157787		TRINITY_DN102600_c0_g1_m.5048	Q76CU2		TRINITY_DN103105_c0_g1_m.6090	Q0INM3		TRINITY_DN101725_c1_g1_m.3268	CSA013844.1
TRINITY_DN101786_c0_g2_m.3371	Cluster-2961.88171		TRINITY_DN102605_c0_g3_m.5060	O82802		TRINITY_DN103119_c2_g2_m.6120	Q6Z2T6		TRINITY_DN101790_c1_g1_m.3376	CSA019857.1
TRINITY_DN101893_c3_g2_m.3561	Cluster-2961.150469		TRINITY_DN102742_c0_g1_m.5316	O24149		TRINITY_DN103144_c0_g4_m.6178	Q7XXP5		TRINITY_DN101859_c1_g2_m.3497	CSA013980.1
TRINITY_DN101986_c0_g1_m.3723	Cluster-2961.131304		TRINITY_DN102902_c1_g3_m.5661	Q03666		TRINITY_DN103176_c1_g1_m.6244	Q2R8U4		TRINITY_DN101893_c3_g2_m.3561	CSA004532.1
TRINITY_DN101995_c0_g1_m.3740	Cluster-2961.139450		TRINITY_DN102910_c56_g26_m.5674	Q42951		TRINITY_DN103181_c0_g1_m.6251	Q8S7T3		TRINITY_DN101977_c4_g2_m.3707	CSA015773.1
TRINITY_DN102004_c0_g1_m.3758	Cluster-2961.161497		TRINITY_DN102922_c0_g2_m.5700	Q75WV0		TRINITY_DN103181_c0_g1_m.6252	Q8S7T4		TRINITY_DN101986_c0_g1_m.3723	CSA035044.1
TRINITY_DN102018_c0_g1_m.3783	Cluster-2961.172657		TRINITY_DN102942_c0_g1_m.5737	P93376		TRINITY_DN103239_c0_g1_m.6403	Q0J4K2		TRINITY_DN102012_c1_g1_m.3775	CSA029626.1
TRINITY_DN102019_c0_g1_m.3788	Cluster-2961.141635		TRINITY_DN103010_c1_g1_m.5891	Q43800		TRINITY_DN103240_c4_g1_m.6409	Q69Y16		TRINITY_DN102018_c0_g1_m.3783	CSA011739.1
TRINITY_DN102039_c0_g3_m.3840	Cluster-2961.124274		TRINITY_DN103119_c2_g2_m.6120	Q9ZS34		TRINITY_DN103270_c0_g1_m.6447	Q69RJ0		TRINITY_DN102019_c0_g1_m.3788	CSA020960.1
TRINITY_DN102126_c0_g1_m.4011	Cluster-2961.134652		TRINITY_DN103181_c0_g1_m.6251	P06405		TRINITY_DN103287_c0_g1_m.6485	Q6ZGC2		TRINITY_DN102039_c0_g3_m.3840	CSA011221.1
TRINITY_DN102168_c1_g1_m.4094	Cluster-2961.150797		TRINITY_DN103181_c0_g1_m.6252	P06407		TRINITY_DN103292_c3_g13_m.6502	Q9MAX5		TRINITY_DN102041_c0_g2_m.3846	CSA027652.1
TRINITY_DN102231_c3_g4_m.4226	Cluster-2961.129557		TRINITY_DN103258_c0_g1_m.6432	P93358		TRINITY_DN103304_c0_g2_m.6519	Q7F099		TRINITY_DN102080_c1_g1_m.3928	CSA012185.1
TRINITY_DN102242_c0_g1_m.4247	Cluster-2961.158232		TRINITY_DN103270_c0_g1_m.6447	Q7M242		TRINITY_DN103453_c0_g2_m.6868	Q5ZCE0		TRINITY_DN102126_c0_g1_m.4011	CSA019996.1
TRINITY_DN102283_c3_g9_m.4332	Cluster-2961.182553		TRINITY_DN103307_c0_g15_m.6526	Q03685		TRINITY_DN103460_c0_g1_m.6877	Q7XTT6		TRINITY_DN102224_c0_g1_m.4214	CSA017891.1
TRINITY_DN102293_c5_g3_m.4358	Cluster-2961.290597		TRINITY_DN103493_c0_g1_m.6956	Q9ZT13		TRINITY_DN103466_c0_g1_m.6888	Q6ZL37		TRINITY_DN102240_c0_g1_m.4244	CSA033184.1
TRINITY_DN102303_c4_g2_m.4372	Cluster-2961.54923		TRINITY_DN103527_c1_g2_m.7055	Q40568		TRINITY_DN103541_c0_g1_m.7077	Q2R2Z0		TRINITY_DN102303_c4_g2_m.4372	CSA021564.1
TRINITY_DN102398_c1_g1_m.4587	Cluster-2961.140051		TRINITY_DN103639_c0_g1_m.7301	A0A0A8JBT3		TRINITY_DN103585_c0_g1_m.7179	Q5VQL1		TRINITY_DN102308_c0_g1_m.4391	CSA002466.1
TRINITY_DN102467_c0_g1_m.4743	Cluster-2961.164192		TRINITY_DN103764_c5_g1_m.7573	W0KS23		TRINITY_DN103612_c1_g1_m.7236	Q6ZLB8		TRINITY_DN102337_c5_g3_m.4456	CSA035939.1
TRINITY_DN102523_c1_g1_m.4888	Cluster-2961.119917		TRINITY_DN103764_c5_g1_m.7574	W0KS23		TRINITY_DN103712_c0_g2_m.7439	Q8LQ33		TRINITY_DN102467_c0_g1_m.4743	CSA010129.1
TRINITY_DN102527_c0_g3_m.4901	Cluster-2961.215216		TRINITY_DN103789_c5_g2_m.7630	A0A068JD95		TRINITY_DN103764_c5_g1_m.7574	Q6AVT2		TRINITY_DN102553_c0_g4_m.4950	CSA017654.1
TRINITY_DN102535_c0_g2_m.4915	Cluster-2961.199322		TRINITY_DN103801_c1_g1_m.7659	A8UDS9		TRINITY_DN103764_c9_g1_m.7580	P0C5D5		TRINITY_DN102564_c0_g1_m.4983	CSA003086.1
TRINITY_DN102535_c0_g2_m.4916	Cluster-2961.177364		TRINITY_DN103814_c0_g1_m.7682	I7GVS5		TRINITY_DN103771_c0_g1_m.7588	Q5VS73		TRINITY_DN102585_c2_g1_m.5022	CSA034422.1
TRINITY_DN102553_c0_g4_m.4950	Cluster-2961.285818		TRINITY_DN103828_c6_g1_m.7709	Q711R1		TRINITY_DN103776_c8_g1_m.7602	Q0D6V8		TRINITY_DN102600_c0_g1_m.5048	CSA003480.1
TRINITY_DN102564_c0_g1_m.4983	Cluster-2961.184667		TRINITY_DN103857_c4_g1_m.7771	Q67C42		TRINITY_DN103801_c1_g1_m.7659	Q0J3N7		TRINITY_DN102766_c0_g2_m.5370	CSA030516.1
TRINITY_DN102593_c2_g1_m.5034	Cluster-2961.148551		TRINITY_DN103866_c0_g1_m.7782	W8SI68		TRINITY_DN103819_c1_g2_m.7690	Q5N7W3		TRINITY_DN102792_c6_g1_m.5430	CSA005991.1
TRINITY_DN102600_c0_g1_m.5048	Cluster-2961.159441		TRINITY_DN103986_c1_g1_m.8014	Q708F5		TRINITY_DN103828_c6_g1_m.7709	Q75KD7		TRINITY_DN102902_c1_g3_m.5661	CSA022649.1
TRINITY_DN102649_c2_g1_m.5144	Cluster-2961.161012		TRINITY_DN104036_c0_g2_m.8121	S4TH40		TRINITY_DN103833_c0_g31_m.7717	Q84M35		TRINITY_DN102902_c3_g1_m.5664	CSA018835.1
TRINITY_DN102650_c0_g1_m.5147	Cluster-2961.145129		TRINITY_DN104037_c3_g1_m.8129	I7A3N8		TRINITY_DN103851_c0_g1_m.7756	Q0DE52		TRINITY_DN102910_c56_g26_m.5674	CSA014052.1
TRINITY_DN102654_c1_g3_m.5151	Cluster-2961.161012		TRINITY_DN104128_c1_g1_m.8348	Q75VJ8		TRINITY_DN103857_c4_g1_m.7771	Q852M0		TRINITY_DN102942_c0_g1_m.5737	CSA033083.1
TRINITY_DN102731_c0_g1_m.5291	Cluster-2961.151754		TRINITY_DN104176_c8_g1_m.8436	A1KYB1		TRINITY_DN103997_c0_g2_m.8041	Q2QP54		TRINITY_DN103010_c1_g1_m.5891	CSA019962.1
TRINITY_DN102807_c3_g4_m.5462	Cluster-2961.180540		TRINITY_DN104288_c5_g2_m.8671	Q5K4L4		TRINITY_DN104037_c3_g1_m.8129	Q2RBN7		TRINITY_DN103071_c1_g6_m.6030	CSA011363.1
TRINITY_DN102851_c1_g1_m.5549	Cluster-2961.160513		TRINITY_DN104344_c3_g4_m.8784	A0A068JFR6		TRINITY_DN104074_c0_g1_m.8232	Q8H3I7		TRINITY_DN103105_c0_g1_m.6090	CSA021656.1
TRINITY_DN102902_c1_g3_m.5661	Cluster-2961.146614		TRINITY_DN104398_c3_g1_m.8914	U3PJP9		TRINITY_DN104085_c0_g1_m.8253	C7IZM0		TRINITY_DN103143_c0_g1_m.6175	CSA022065.1
TRINITY_DN102931_c0_g1_m.5722	Cluster-2961.151916		TRINITY_DN104481_c0_g11_m.9096	L7UU40		TRINITY_DN104123_c1_g1_m.8333	Q2QNG7		TRINITY_DN103176_c1_g1_m.6244	CSA015506.1
TRINITY_DN102942_c0_g1_m.5737	Cluster-2961.216242		TRINITY_DN104654_c1_g1_m.9481	Q43798		TRINITY_DN104169_c1_g3_m.8429	Q10RE5		TRINITY_DN103194_c1_g1_m.6280	CSA010476.1
TRINITY_DN103010_c1_g1_m.5891	Cluster-2961.155210		TRINITY_DN104654_c1_g1_m.9482	Q43797		TRINITY_DN104176_c8_g1_m.8436	Q0ISV7		TRINITY_DN103200_c0_g1_m.6298	CSA015928.1
TRINITY_DN103071_c1_g6_m.6030	Cluster-2961.201727		TRINITY_DN104664_c0_g27_m.9515	O04899		TRINITY_DN104197_c0_g2_m.8476	Q75HW4		TRINITY_DN103239_c0_g1_m.6403	CSA012667.1
TRINITY_DN103105_c0_g1_m.6090	Cluster-2961.157469		TRINITY_DN104664_c0_g9_m.9517	O04899		TRINITY_DN104208_c0_g7_m.8497	Q0D4G9		TRINITY_DN103258_c0_g1_m.6432	CSA013419.1
TRINITY_DN103119_c2_g2_m.6120	Cluster-2961.154574		TRINITY_DN104794_c8_g2_m.9785	Q9ZP87		TRINITY_DN104293_c0_g1_m.8678	Q6ZFX8		TRINITY_DN103270_c0_g1_m.6447	CSA003654.1
TRINITY_DN103154_c0_g1_m.6194	Cluster-2961.93929		TRINITY_DN104800_c1_g4_m.9810	V9TI00		TRINITY_DN104344_c3_g4_m.8784	Q0JQP8		TRINITY_DN103291_c0_g1_m.6496	CSA033673.1
TRINITY_DN103176_c1_g1_m.6244	Cluster-2961.112453		TRINITY_DN104929_c0_g1_m.10154	L8B431		TRINITY_DN104350_c0_g2_m.8798	Q2R3A1		TRINITY_DN103304_c0_g2_m.6519	CSA011770.1
TRINITY_DN103181_c0_g1_m.6251	Cluster-2961.196431		TRINITY_DN104961_c1_g2_m.10230	P93352		TRINITY_DN104386_c4_g1_m.8899	Q6ZGJ7		TRINITY_DN103307_c0_g15_m.6526	CSA032793.1
TRINITY_DN103181_c0_g1_m.6252	Cluster-2961.196431		TRINITY_DN104983_c2_g2_m.10276	Q1G0Z1		TRINITY_DN104398_c3_g1_m.8914	A3C4S4		TRINITY_DN103337_c1_g3_m.6595	CSA033912.1
TRINITY_DN103239_c0_g1_m.6403	Cluster-2961.170161		TRINITY_DN105344_c7_g1_m.11078	O80362		TRINITY_DN104565_c0_g2_m.9292	Q6EP55		TRINITY_DN103443_c0_g2_m.6843	CSA015987.1
TRINITY_DN103258_c0_g1_m.6432	Cluster-2961.155857		TRINITY_DN105363_c1_g17_m.11137	A0A059XN47		TRINITY_DN104567_c6_g1_m.9296	Q0JLS6		TRINITY_DN103466_c0_g1_m.6888	CSA013336.1
TRINITY_DN103260_c1_g2_m.6433	Cluster-2961.217263		TRINITY_DN105430_c5_g1_m.11282	Q45KF8		TRINITY_DN104654_c1_g1_m.9482	Q67WN5		TRINITY_DN103485_c0_g2_m.6939	CSA032560.1
TRINITY_DN103270_c0_g1_m.6447	Cluster-2961.144772		TRINITY_DN105462_c1_g2_m.11380	O82151		TRINITY_DN104730_c3_g5_m.9631	Q6ZFM7		TRINITY_DN103493_c0_g1_m.6956	CSA010324.1
TRINITY_DN103272_c0_g1_m.6449	Cluster-2961.213690		TRINITY_DN105755_c1_g25_m.11954	Q40495		TRINITY_DN104822_c1_g3_m.9885	Q688H6		TRINITY_DN103527_c1_g2_m.7055	CSA013466.1
TRINITY_DN103289_c0_g1_m.6491	Cluster-2961.150548		TRINITY_DN105784_c0_g1_m.12019	Q8W400		TRINITY_DN104833_c0_g5_m.9927	Q6ZG77		TRINITY_DN103563_c1_g3_m.7122	CSA031574.1
TRINITY_DN103307_c0_g15_m.6526	Cluster-2961.158549		TRINITY_DN105855_c0_g1_m.12142	Q76CU2		TRINITY_DN104843_c0_g1_m.9949	Q10HZ8		TRINITY_DN103574_c1_g1_m.7152	CSA025894.1
TRINITY_DN103337_c1_g3_m.6595	Cluster-2961.159671		TRINITY_DN105870_c1_g6_m.12180	Q9ZT13		TRINITY_DN104943_c0_g1_m.10199	Q69JX7		TRINITY_DN103612_c1_g1_m.7236	CSA012572.1
TRINITY_DN103413_c0_g1_m.6788	Cluster-2961.34387		TRINITY_DN105870_c1_g9_m.12181	Q1G0Z1		TRINITY_DN104961_c1_g2_m.10230	Q6H4L2		TRINITY_DN103612_c1_g1_m.7239	CSA012999.1
TRINITY_DN103443_c0_g2_m.6843	Cluster-2961.92642		TRINITY_DN105881_c0_g1_m.12216	P06355		TRINITY_DN104983_c2_g2_m.10276	Q10RP0		TRINITY_DN103639_c0_g1_m.7301	CSA025025.1
TRINITY_DN103452_c0_g1_m.6866	Cluster-2961.174422		TRINITY_DN10790_c0_g1_m.12825	I7GVS5		TRINITY_DN105019_c2_g14_m.10356	Q60EL7		TRINITY_DN103667_c1_g3_m.7351	CSA005556.1
TRINITY_DN103460_c0_g1_m.6877	Cluster-2961.154733		TRINITY_DN11192_c0_g2_m.13091	L7UU40		TRINITY_DN105080_c0_g1_m.10486	Q53WJ5		TRINITY_DN103712_c0_g2_m.7439	CSA026673.1
TRINITY_DN103466_c0_g1_m.6888	Cluster-2961.92975		TRINITY_DN116059_c0_g1_m.13447	A0A068JFR6		TRINITY_DN105098_c2_g8_m.10531	Q7XJB4		TRINITY_DN103764_c5_g1_m.7573	CSA014385.1
TRINITY_DN103485_c0_g2_m.6939	Cluster-2961.83494		TRINITY_DN129377_c0_g1_m.14438	Q9SLS1		TRINITY_DN105113_c0_g1_m.10566	Q653Z1		TRINITY_DN103764_c5_g1_m.7574	CSA014385.1
TRINITY_DN103493_c0_g1_m.6956	Cluster-2961.176839		TRINITY_DN42304_c0_g1_m.16189	O04945		TRINITY_DN105223_c2_g1_m.10826	Q6Z9G0		TRINITY_DN103764_c9_g1_m.7580	CSA010519.1
TRINITY_DN103541_c0_g1_m.7077	Cluster-2961.170674		TRINITY_DN4821_c0_g2_m.16446	A8J6V0		TRINITY_DN105288_c2_g1_m.10974	Q6ZBK6		TRINITY_DN103771_c0_g1_m.7588	CSA033762.1
TRINITY_DN103563_c1_g3_m.7122	Cluster-2961.157558		TRINITY_DN50714_c0_g3_m.16590	A0A059TCI1		TRINITY_DN105344_c7_g1_m.11078	Q10N30		TRINITY_DN103776_c8_g1_m.7602	CSA027312.1
TRINITY_DN103585_c0_g1_m.7179	Cluster-2961.126749		TRINITY_DN51048_c0_g1_m.16604	A0A068JIB0		TRINITY_DN105395_c2_g2_m.11198	Q7XMK8		TRINITY_DN103789_c5_g2_m.7630	CSA030111.1
TRINITY_DN103612_c1_g1_m.7236	Cluster-2961.137548		TRINITY_DN52351_c0_g1_m.16713	A0A076L2F1		TRINITY_DN105462_c1_g2_m.11380	Q10CU9		TRINITY_DN103801_c1_g1_m.7659	CSA011382.1
TRINITY_DN103734_c0_g1_m.7495	Cluster-2961.145793		TRINITY_DN52453_c0_g1_m.16720	Q40480		TRINITY_DN105607_c0_g15_m.11655	Q0J5V5		TRINITY_DN103814_c0_g1_m.7682	CSA016462.1
TRINITY_DN103752_c0_g1_m.7531	Cluster-2961.161497		TRINITY_DN54985_c0_g2_m.16864	Q40567		TRINITY_DN105607_c0_g7_m.11659	Q6Z6L4		TRINITY_DN103828_c6_g1_m.7709	CSA011729.1
TRINITY_DN103764_c5_g1_m.7573	Cluster-2961.124318		TRINITY_DN55520_c0_g1_m.16899	P29449		TRINITY_DN105877_c16_g1_m.12207	Q6ZCP3		TRINITY_DN103833_c0_g31_m.7717	CSA011959.1
TRINITY_DN103764_c5_g1_m.7574	Cluster-2961.124318		TRINITY_DN59128_c0_g1_m.17126	A8J6V0		TRINITY_DN105881_c0_g1_m.12216	Q8S6G1		TRINITY_DN103857_c4_g1_m.7771	CSA011735.1
TRINITY_DN103764_c9_g1_m.7580	Cluster-2961.165299		TRINITY_DN63502_c0_g1_m.17512	A0A075M5E6		TRINITY_DN106508_c0_g1_m.12680	Q6YVI0		TRINITY_DN103948_c3_g1_m.7952	CSA013450.1
TRINITY_DN103771_c0_g1_m.7588	Cluster-2961.91719		TRINITY_DN63600_c0_g1_m.17517	Q9M5Z8		TRINITY_DN128853_c0_g1_m.14381	Q7XXS0		TRINITY_DN103974_c0_g1_m.7997	CSA029135.1
TRINITY_DN103789_c5_g2_m.7630	Cluster-2961.285818		TRINITY_DN63741_c0_g1_m.17529	S4X189		TRINITY_DN18481_c0_g2_m.15329	Q8H8D6		TRINITY_DN103997_c0_g2_m.8041	CSA007724.1
TRINITY_DN103794_c1_g1_m.7639	Cluster-2961.150489		TRINITY_DN64209_c0_g1_m.17563	Q9FXQ2		TRINITY_DN20004_c0_g1_m.15386	Q5Z858		TRINITY_DN104036_c0_g2_m.8121	CSA007390.1
TRINITY_DN103814_c0_g1_m.7682	Cluster-2961.148176		TRINITY_DN64209_c0_g2_m.17565	Q9FXQ2		TRINITY_DN27637_c0_g1_m.15649	Q0IT43		TRINITY_DN104037_c3_g1_m.8129	CSA015535.1
TRINITY_DN103833_c0_g31_m.7717	Cluster-2961.150681		TRINITY_DN68431_c0_g1_m.17871	Q5KTN4		TRINITY_DN34687_c0_g1_m.15911	Q69QR6		TRINITY_DN104076_c0_g3_m.8233	CSA036031.1
TRINITY_DN103851_c0_g1_m.7756	Cluster-2961.285540		TRINITY_DN69851_c0_g3_m.18089	Q948K4		TRINITY_DN42304_c0_g1_m.16189	Q6Z0I4		TRINITY_DN104123_c1_g1_m.8333	CSA016421.1
TRINITY_DN103857_c4_g1_m.7771	Cluster-2961.150100		TRINITY_DN721_c0_g2_m.18360	A0A140G1Q8		TRINITY_DN49720_c0_g1_m.16526	Q5JMR9		TRINITY_DN104128_c1_g1_m.8348	CSA021114.1
TRINITY_DN103974_c0_g1_m.7997	Cluster-2961.228796		TRINITY_DN721_c0_g2_m.18361	P69686		TRINITY_DN52351_c0_g1_m.16713	Q7XMK5		TRINITY_DN104176_c8_g1_m.8436	CSA004426.1
TRINITY_DN104036_c0_g2_m.8121	Cluster-2961.153210		TRINITY_DN73357_c1_g3_m.18513	A0A0C4FST8		TRINITY_DN53129_c0_g1_m.16760	Q10LF1		TRINITY_DN104207_c5_g1_m.8495	CSA020590.1
TRINITY_DN104037_c3_g1_m.8129	Cluster-2961.207052		TRINITY_DN73358_c0_g1_m.18515	P29449		TRINITY_DN55520_c0_g1_m.16899	Q0D840		TRINITY_DN104272_c6_g2_m.8627	CSA014012.1
TRINITY_DN104063_c0_g2_m.8197	Cluster-2961.159158		TRINITY_DN73825_c0_g1_m.18587	Q40569		TRINITY_DN60984_c0_g1_m.17279	P09229		TRINITY_DN104289_c4_g1_m.8672	CSA026274.1
TRINITY_DN104074_c0_g1_m.8232	Cluster-2961.148806		TRINITY_DN74386_c0_g1_m.18654	P30359		TRINITY_DN63502_c0_g1_m.17512	Q2QTJ7		TRINITY_DN104344_c3_g4_m.8784	CSA003118.1
TRINITY_DN104085_c0_g1_m.8253	Cluster-2961.154248		TRINITY_DN75140_c0_g1_m.18753	Q6RUN4		TRINITY_DN63600_c0_g1_m.17517	Q9ASE0		TRINITY_DN104386_c4_g1_m.8899	CSA036790.1
TRINITY_DN104085_c0_g2_m.8254	Cluster-2961.154248		TRINITY_DN75602_c0_g1_m.18808	Q40567		TRINITY_DN63741_c0_g1_m.17529	P0C512		TRINITY_DN104398_c3_g1_m.8914	CSA034927.1
TRINITY_DN104169_c1_g3_m.8429	Cluster-2961.144338		TRINITY_DN75655_c0_g1_m.18814	P27493		TRINITY_DN64052_c1_g1_m.17549	Q9ZST1		TRINITY_DN104481_c0_g11_m.9096	CSA029580.1
TRINITY_DN104197_c0_g2_m.8476	Cluster-2961.132065		TRINITY_DN75765_c0_g1_m.18827	Q9XGH8		TRINITY_DN64209_c0_g2_m.17565	Q8L5K0		TRINITY_DN104654_c1_g1_m.9481	CSA000036.1
TRINITY_DN104206_c2_g2_m.8491	Cluster-2961.176021		TRINITY_DN76765_c0_g1_m.18999	A0A0K0XR75		TRINITY_DN64261_c0_g2_m.17573	Q2QPD1		TRINITY_DN104654_c1_g1_m.9482	CSA000036.1
TRINITY_DN104272_c6_g2_m.8627	Cluster-2961.108410		TRINITY_DN77153_c0_g1_m.19086	A0A076KWG2		TRINITY_DN65644_c0_g3_m.17660	Q7Y139		TRINITY_DN104669_c0_g1_m.9525	CSA011933.1
TRINITY_DN104293_c0_g1_m.8678	Cluster-2961.103954		TRINITY_DN77903_c0_g2_m.19165	Q03666		TRINITY_DN67522_c0_g1_m.17811	Q8H3M0		TRINITY_DN104761_c0_g11_m.9704	CSA001213.1
TRINITY_DN104296_c0_g2_m.8684	Cluster-2961.148430		TRINITY_DN78381_c0_g1_m.19249	D2CNC8		TRINITY_DN68431_c0_g1_m.17871	Q2R2W2		TRINITY_DN104761_c0_g12_m.9706	CSA001213.1
TRINITY_DN104344_c3_g4_m.8784	Cluster-2961.86504		TRINITY_DN78455_c0_g1_m.19256	K0I7G7		TRINITY_DN69419_c0_g2_m.18029	Q2QZ12		TRINITY_DN104761_c0_g19_m.9708	CSA010129.1
TRINITY_DN104351_c2_g2_m.8804	Cluster-2961.84264		TRINITY_DN78658_c0_g1_m.19296	Q852S5		TRINITY_DN69965_c0_g1_m.18103	P92683		TRINITY_DN104761_c0_g21_m.9710	CSA018181.1
TRINITY_DN104386_c4_g1_m.8899	Cluster-2961.146988		TRINITY_DN79262_c0_g1_m.19430	W0KS23		TRINITY_DN71863_c0_g1_m.18308	Q10PA5		TRINITY_DN104794_c8_g2_m.9785	CSA024413.1
TRINITY_DN104387_c0_g1_m.8902	Cluster-2961.149423		TRINITY_DN79779_c0_g1_m.19551	Q67BD0		TRINITY_DN721_c0_g2_m.18360	C7IWD0		TRINITY_DN104843_c0_g1_m.9949	CSA008044.1
TRINITY_DN104481_c0_g11_m.9096	Cluster-2961.156588		TRINITY_DN79854_c0_g1_m.19563	Q9FSF0		TRINITY_DN73380_c0_g1_m.18524	Q8H2J8		TRINITY_DN104953_c1_g3_m.10217	CSA017818.1
TRINITY_DN104567_c6_g1_m.9296	Cluster-2961.86699		TRINITY_DN80368_c0_g1_m.19685	P93344		TRINITY_DN73715_c0_g1_m.18577	Q8GS72		TRINITY_DN104961_c1_g2_m.10230	CSA011928.1
TRINITY_DN104582_c0_g1_m.9329	Cluster-2961.141661		TRINITY_DN80519_c0_g1_m.19711	P49098		TRINITY_DN75140_c0_g1_m.18753	Q943W1		TRINITY_DN104983_c2_g2_m.10276	CSA007544.1
TRINITY_DN104669_c0_g1_m.9525	Cluster-2961.182317		TRINITY_DN80819_c0_g1_m.19782	B6A8D0		TRINITY_DN76934_c0_g1_m.19035	Q0J0Z5		TRINITY_DN105019_c2_g13_m.10355	CSA023774.1
TRINITY_DN104679_c0_g1_m.9548	Cluster-2961.83494		TRINITY_DN81010_c0_g1_m.19826	Q9SLN8		TRINITY_DN77008_c0_g1_m.19048	Q945X3		TRINITY_DN105019_c2_g14_m.10356	CSA023774.1
TRINITY_DN104708_c1_g1_m.9594	Cluster-2961.161033		TRINITY_DN81028_c0_g1_m.19834	A0A075EYQ6		TRINITY_DN77153_c0_g1_m.19086	Q6YYW3		TRINITY_DN105098_c2_g8_m.10531	CSA005231.1
TRINITY_DN104730_c3_g5_m.9631	Cluster-2961.149423		TRINITY_DN81346_c0_g1_m.19921	A0A097BTX9		TRINITY_DN78180_c0_g2_m.19215	Q65XW4		TRINITY_DN105113_c0_g1_m.10566	CSA009530.1
TRINITY_DN104761_c0_g11_m.9704	Cluster-2961.164192		TRINITY_DN81727_c0_g1_m.20015	I2G7N7		TRINITY_DN78381_c0_g1_m.19249	Q8S1N3		TRINITY_DN105145_c1_g3_m.10651	CSA002974.1
TRINITY_DN104761_c0_g12_m.9706	Cluster-2961.164192		TRINITY_DN81786_c0_g1_m.20026	Q40493		TRINITY_DN78834_c0_g3_m.19326	Q84PB7		TRINITY_DN105158_c25_g1_m.10689	CSA005866.1
TRINITY_DN104761_c0_g19_m.9708	Cluster-2961.120785		TRINITY_DN81936_c0_g1_m.20073	Q40493		TRINITY_DN78853_c0_g1_m.19329	Q0J9V5		TRINITY_DN105189_c5_g1_m.10750	CSA018167.1
TRINITY_DN104827_c0_g10_m.9903	Cluster-2961.129557		TRINITY_DN82028_c0_g2_m.20103	A0A097BTZ6		TRINITY_DN79678_c0_g1_m.19522	Q10QH0		TRINITY_DN105223_c2_g1_m.10826	CSA034340.1
TRINITY_DN104929_c0_g1_m.10154	Cluster-2961.126285		TRINITY_DN82111_c0_g1_m.20118	Q40471		TRINITY_DN79854_c0_g1_m.19563	Q7XDC8		TRINITY_DN105288_c2_g1_m.10974	CSA005456.1
TRINITY_DN104937_c3_g1_m.10182	Cluster-2961.150489		TRINITY_DN82214_c0_g1_m.20144	E5L8B5		TRINITY_DN80427_c0_g1_m.19699	Q84R32		TRINITY_DN105363_c1_g17_m.11137	CSA007279.1
TRINITY_DN104949_c0_g1_m.10211	Cluster-2961.139776		TRINITY_DN82515_c0_g1_m.20219	A0A076L4P6		TRINITY_DN80569_c0_g1_m.19724	C7IYR0		TRINITY_DN105395_c2_g2_m.11198	CSA005422.1
TRINITY_DN104953_c1_g3_m.10217	Cluster-2961.180966		TRINITY_DN82929_c0_g1_m.20286	B6VRE8		TRINITY_DN80769_c0_g1_m.19767	Q69XJ9		TRINITY_DN105416_c5_g1_m.11260	CSA029149.1
TRINITY_DN104961_c1_g2_m.10230	Cluster-2961.113614		TRINITY_DN83046_c0_g1_m.20311	M4N8X4		TRINITY_DN80778_c0_g1_m.19768	Q69LC1		TRINITY_DN105462_c1_g2_m.11380	CSA007781.1
TRINITY_DN104983_c2_g2_m.10276	Cluster-2961.140064		TRINITY_DN83219_c0_g2_m.20398	A0A077D9N5		TRINITY_DN80819_c0_g1_m.19782	Q0J1Q2		TRINITY_DN105607_c0_g13_m.11654	CSA019238.1
TRINITY_DN105019_c2_g13_m.10355	Cluster-2961.219362		TRINITY_DN83486_c0_g1_m.20488	Q9XG77		TRINITY_DN81010_c0_g1_m.19826	Q7XUK3		TRINITY_DN105607_c0_g15_m.11655	CSA019238.1
TRINITY_DN105019_c2_g14_m.10356	Cluster-2961.174798		TRINITY_DN83851_c0_g1_m.20609	A8J6V0		TRINITY_DN81028_c0_g1_m.19834	Q84ZK1		TRINITY_DN105607_c0_g7_m.11659	CSA019238.1
TRINITY_DN105035_c0_g4_m.10394	Cluster-2961.243338		TRINITY_DN83861_c0_g1_m.20612	Q93X31		TRINITY_DN81346_c0_g1_m.19921	Q7XBY4		TRINITY_DN105856_c0_g3_m.12150	CSA021703.1
TRINITY_DN105080_c0_g1_m.10486	Cluster-2961.154733		TRINITY_DN83980_c0_g1_m.20661	Q5DKU6		TRINITY_DN81693_c0_g1_m.20003	Q6Z3T3		TRINITY_DN105870_c1_g6_m.12180	CSA013184.1
TRINITY_DN105098_c2_g8_m.10531	Cluster-2961.193733		TRINITY_DN84036_c0_g1_m.20684	Q7XZV3		TRINITY_DN81786_c0_g1_m.20026	Q6ZH98		TRINITY_DN105870_c1_g9_m.12181	CSA013184.1
TRINITY_DN105134_c0_g1_m.10617	Cluster-2961.147001		TRINITY_DN84142_c0_g1_m.20714	A0A076L2E1		TRINITY_DN81995_c0_g1_m.20084	Q8SA35		TRINITY_DN105911_c8_g2_m.12314	CSA004048.1
TRINITY_DN105189_c5_g1_m.10750	Cluster-2961.226752		TRINITY_DN84161_c0_g1_m.20721	E5L8B6		TRINITY_DN82028_c0_g2_m.20103	Q6ZD65		TRINITY_DN105985_c12_g6_m.12448	CSA004048.1
TRINITY_DN105223_c2_g1_m.10826	Cluster-2961.148485		TRINITY_DN84206_c0_g1_m.20724	Q8H0G7		TRINITY_DN82111_c0_g1_m.20118	Q6Z2Z4		TRINITY_DN106262_c0_g1_m.12661	CSA036241.1
TRINITY_DN105250_c2_g3_m.10894	Cluster-2961.141751		TRINITY_DN84649_c0_g1_m.20850	Q40540		TRINITY_DN82151_c0_g1_m.20122	Q5TKJ2		TRINITY_DN106508_c0_g1_m.12680	CSA003952.1
TRINITY_DN105288_c2_g1_m.10974	Cluster-2961.255297		TRINITY_DN85299_c0_g1_m.21058	B6A8D0		TRINITY_DN82214_c0_g1_m.20144	Q6H7E4		TRINITY_DN10790_c0_g1_m.12825	CSA016462.1
TRINITY_DN105325_c0_g1_m.11046	Cluster-2961.185444		TRINITY_DN85377_c0_g1_m.21083	U3PHS9		TRINITY_DN83093_c0_g1_m.20330	Q0DZF7		TRINITY_DN11192_c0_g2_m.13091	CSA029580.1
TRINITY_DN105363_c1_g17_m.11137	Cluster-2961.160106		TRINITY_DN85575_c0_g3_m.21159	A8J6V0		TRINITY_DN83210_c0_g1_m.20393	Q84VC9		TRINITY_DN116059_c0_g1_m.13447	CSA003118.1
TRINITY_DN105395_c2_g2_m.11198	Cluster-2961.148070		TRINITY_DN85598_c0_g2_m.21173	Q9FSF6		TRINITY_DN83219_c0_g2_m.20398	Q9FR35		TRINITY_DN128853_c0_g1_m.14381	CSA030644.1
TRINITY_DN105430_c5_g1_m.11282	Cluster-2961.126285		TRINITY_DN85915_c0_g1_m.21317	Q5QJB2		TRINITY_DN83248_c0_g1_m.20411	Q2QLY4		TRINITY_DN129377_c0_g1_m.14438	CSA020890.1
TRINITY_DN105491_c1_g2_m.11433	Cluster-2961.202525		TRINITY_DN86110_c0_g1_m.21402	H9CCI2		TRINITY_DN83266_c0_g1_m.20420	Q2QU06		TRINITY_DN4821_c0_g2_m.16446	CSA001605.1
TRINITY_DN105607_c0_g7_m.11659	Cluster-2961.183847		TRINITY_DN86137_c0_g1_m.21438	O65855		TRINITY_DN83653_c0_g1_m.20532	Q84PB4		TRINITY_DN50714_c0_g3_m.16590	CSA009375.1
TRINITY_DN105755_c1_g25_m.11954	Cluster-2961.126322		TRINITY_DN86269_c0_g1_m.21504	P27154		TRINITY_DN83837_c0_g1_m.20601	Q2QZL4		TRINITY_DN51048_c0_g1_m.16604	CSA011908.1
TRINITY_DN105784_c0_g1_m.12019	Cluster-2961.98220		TRINITY_DN86340_c0_g1_m.21519	Q40481		TRINITY_DN83980_c0_g1_m.20661	Q6K1R5		TRINITY_DN52351_c0_g1_m.16713	CSA034831.1
TRINITY_DN105855_c0_g1_m.12142	Cluster-2961.209760		TRINITY_DN86416_c0_g1_m.21571	W8SRJ3		TRINITY_DN84036_c0_g1_m.20684	Q6ZBZ2		TRINITY_DN52453_c0_g1_m.16720	CSA007990.1
TRINITY_DN105870_c1_g6_m.12180	Cluster-2961.176839		TRINITY_DN86442_c0_g2_m.21581	A0A076L4N7		TRINITY_DN84161_c0_g1_m.20721	Q8S091		TRINITY_DN53129_c0_g1_m.16760	CSA010842.1
TRINITY_DN105870_c1_g9_m.12181	Cluster-2961.155289		TRINITY_DN86584_c0_g1_m.21646	Q8VZH4		TRINITY_DN84369_c0_g1_m.20773	Q6ZJ08		TRINITY_DN54985_c0_g2_m.16864	CSA018083.1
TRINITY_DN105905_c12_g34_m.12294	Cluster-2961.126285		TRINITY_DN86752_c0_g1_m.21719	Q9FSF2		TRINITY_DN84782_c0_g1_m.20891	Q6AVV2		TRINITY_DN55749_c0_g1_m.16922	CSA007008.1
TRINITY_DN105985_c12_g6_m.12448	Cluster-2961.213690		TRINITY_DN86809_c0_g1_m.21753	G5ELZ2		TRINITY_DN85307_c0_g1_m.21064	Q8LQD2		TRINITY_DN55938_c0_g1_m.16938	CSA024855.1
TRINITY_DN106262_c0_g1_m.12661	Cluster-2961.152986		TRINITY_DN87019_c0_g1_m.21856	A8J6V0		TRINITY_DN85598_c0_g2_m.21173	Q9LWN1		TRINITY_DN59128_c0_g1_m.17126	CSA001605.1
TRINITY_DN10790_c0_g1_m.12825	Cluster-2961.149954		TRINITY_DN87062_c0_g1_m.21880	A0A075F2H1		TRINITY_DN85915_c0_g1_m.21317	Q2R1S1		TRINITY_DN60704_c0_g1_m.17243	CSA026777.1
TRINITY_DN11192_c0_g2_m.13091	Cluster-2961.156588		TRINITY_DN87114_c0_g1_m.21904	Q68GS0		TRINITY_DN86137_c0_g1_m.21438	Q7X7I6		TRINITY_DN63502_c0_g1_m.17512	CSA004763.1
TRINITY_DN116059_c0_g1_m.13447	Cluster-2961.144458		TRINITY_DN87266_c0_g1_m.21965	X5CS07		TRINITY_DN86269_c0_g1_m.21504	Q8H4V1		TRINITY_DN63600_c0_g1_m.17517	CSA030636.1
TRINITY_DN128853_c0_g1_m.14381	Cluster-2961.157828		TRINITY_DN87616_c0_g1_m.22101	Q75ZD4		TRINITY_DN86340_c0_g1_m.21519	Q6YWJ7		TRINITY_DN63741_c0_g1_m.17529	CSA020605.1
TRINITY_DN129377_c0_g1_m.14438	Cluster-2961.121254		TRINITY_DN87616_c0_g2_m.22103	Q75ZD4		TRINITY_DN86416_c0_g1_m.21571	Q5N7P9		TRINITY_DN64052_c1_g1_m.17549	CSA028934.1
TRINITY_DN135180_c0_g1_m.14871	Cluster-2961.146290		TRINITY_DN87639_c0_g1_m.22116	B2YKT9		TRINITY_DN86435_c0_g1_m.21578	Q10I42		TRINITY_DN64209_c0_g1_m.17563	CSA016400.1
TRINITY_DN20004_c0_g1_m.15386	Cluster-2961.96814		TRINITY_DN87640_c0_g1_m.22117	Q40519		TRINITY_DN86442_c0_g2_m.21581	Q69UI2		TRINITY_DN64209_c0_g2_m.17565	CSA016400.1
TRINITY_DN27637_c0_g1_m.15649	Cluster-2961.85040		TRINITY_DN87654_c0_g1_m.22133	Q42961		TRINITY_DN86446_c0_g1_m.21583	Q69JW2		TRINITY_DN64261_c0_g2_m.17573	CSA017190.1
TRINITY_DN31668_c0_g2_m.15793	Cluster-2961.151964		TRINITY_DN87675_c1_g1_m.22141	A0A068JCD7		TRINITY_DN86522_c0_g1_m.21628	Q6K680		TRINITY_DN65644_c0_g3_m.17660	CSA033099.1
TRINITY_DN42304_c0_g1_m.16189	Cluster-2961.161684		TRINITY_DN87684_c0_g1_m.22148	P29790		TRINITY_DN86703_c0_g1_m.21707	B9FK36		TRINITY_DN67778_c0_g1_m.17831	CSA011933.1
TRINITY_DN4821_c0_g2_m.16446	Cluster-2961.153631		TRINITY_DN87747_c0_g1_m.22183	Q40589		TRINITY_DN87004_c0_g1_m.21850	Q53PZ2		TRINITY_DN68431_c0_g1_m.17871	CSA029484.1
TRINITY_DN49720_c0_g1_m.16526	Cluster-2961.97100		TRINITY_DN87776_c0_g1_m.22193	Q68GS0		TRINITY_DN87019_c0_g1_m.21856	Q0JQL7		TRINITY_DN68564_c0_g1_m.17886	CSA029723.1
TRINITY_DN50714_c0_g3_m.16590	Cluster-2961.162960		TRINITY_DN87878_c0_g1_m.22249	Q9FXS3		TRINITY_DN87062_c0_g1_m.21880	Q6K8D4		TRINITY_DN69158_c0_g1_m.17980	CSA003336.1
TRINITY_DN51048_c0_g1_m.16604	Cluster-2961.275601		TRINITY_DN87886_c0_g1_m.22253	Q6TXM4		TRINITY_DN87101_c0_g1_m.21894	Q7Y0E8		TRINITY_DN69851_c0_g3_m.18089	CSA029484.1
TRINITY_DN52351_c0_g1_m.16713	Cluster-2961.153724		TRINITY_DN87916_c0_g1_m.22279	A0A076L2F1		TRINITY_DN87110_c0_g1_m.21898	Q2R1J8		TRINITY_DN70132_c0_g1_m.18121	CSA016596.1
TRINITY_DN52453_c0_g1_m.16720	Cluster-2961.131304		TRINITY_DN87936_c0_g1_m.22285	D2K7Z2		TRINITY_DN87155_c0_g2_m.21913	Q0DQM6		TRINITY_DN71754_c0_g1_m.18297	CSA023845.1
TRINITY_DN53129_c0_g1_m.16760	Cluster-2961.153560		TRINITY_DN88061_c0_g1_m.22326	A0A076L4Q6		TRINITY_DN87602_c0_g1_m.22098	Q9FVZ7		TRINITY_DN71987_c0_g1_m.18327	CSA017185.1
TRINITY_DN53197_c0_g1_m.16763	Cluster-2961.84264		TRINITY_DN88185_c0_g1_m.22394	E2F3S9		TRINITY_DN87616_c0_g2_m.22103	Q10E23		TRINITY_DN721_c0_g2_m.18361	CSA015352.1
TRINITY_DN55520_c0_g1_m.16899	Cluster-2961.97100		TRINITY_DN88191_c0_g1_m.22399	A0A077D9N5		TRINITY_DN87639_c0_g1_m.22116	Q6ASX7		TRINITY_DN73380_c0_g1_m.18524	CSA033673.1
TRINITY_DN55749_c0_g1_m.16922	Cluster-2961.135739		TRINITY_DN88222_c0_g1_m.22415	Q9FSF0		TRINITY_DN87640_c0_g1_m.22117	Q6ZBV1		TRINITY_DN73825_c0_g1_m.18587	CSA010771.1
TRINITY_DN59128_c0_g1_m.17126	Cluster-2961.174383		TRINITY_DN88317_c0_g1_m.22469	A0A075M9F5		TRINITY_DN87654_c0_g1_m.22133	Q75K90		TRINITY_DN74386_c0_g1_m.18654	CSA010129.1
TRINITY_DN60704_c0_g1_m.17243	Cluster-2961.146614		TRINITY_DN88351_c0_g1_m.22489	P24929		TRINITY_DN87684_c0_g1_m.22148	Q84NW1		TRINITY_DN75140_c0_g1_m.18753	CSA035603.1
TRINITY_DN61373_c0_g1_m.17300	Cluster-2961.156621		TRINITY_DN88372_c0_g1_m.22502	Q38HM5		TRINITY_DN87689_c0_g1_m.22149	Q7XK23		TRINITY_DN75602_c0_g1_m.18808	CSA018083.1
TRINITY_DN61759_c0_g1_m.17341	Cluster-2961.153210		TRINITY_DN88412_c0_g1_m.22524	A9XG41		TRINITY_DN87695_c0_g1_m.22151	Q6Z129		TRINITY_DN75655_c0_g1_m.18814	CSA035910.1
TRINITY_DN62083_c0_g1_m.17372	Cluster-2961.155563		TRINITY_DN88475_c0_g1_m.22566	Q75XU8		TRINITY_DN87721_c0_g1_m.22164	Q9LST8		TRINITY_DN75897_c0_g2_m.18871	CSA009518.1
TRINITY_DN63502_c0_g1_m.17512	Cluster-2961.147283		TRINITY_DN88603_c1_g1_m.22627	Q76MF3		TRINITY_DN87869_c0_g1_m.22244	Q7X806		TRINITY_DN76851_c0_g1_m.19011	CSA027186.1
TRINITY_DN63600_c0_g1_m.17517	Cluster-2961.202359		TRINITY_DN88612_c0_g1_m.22631	Q93X38		TRINITY_DN87878_c0_g1_m.22249	Q5SMW6		TRINITY_DN76934_c0_g1_m.19035	CSA001864.1
TRINITY_DN63741_c0_g1_m.17529	Cluster-2961.148095		TRINITY_DN88657_c0_g1_m.22651	W0KMC2		TRINITY_DN87886_c0_g1_m.22253	Q7XPY2		TRINITY_DN77008_c0_g1_m.19048	CSA026777.1
TRINITY_DN64209_c0_g1_m.17563	Cluster-2961.84057		TRINITY_DN88668_c0_g1_m.22660	A2V884		TRINITY_DN87897_c0_g1_m.22265	Q84TB3		TRINITY_DN77153_c0_g1_m.19086	CSA017616.1
TRINITY_DN64209_c0_g2_m.17565	Cluster-2961.84057		TRINITY_DN88673_c0_g1_m.22662	P00823		TRINITY_DN87936_c0_g1_m.22285	Q2QWN3		TRINITY_DN77903_c0_g2_m.19165	CSA007990.1
TRINITY_DN64261_c0_g2_m.17573	Cluster-2961.153560		TRINITY_DN88727_c0_g1_m.22702	O24135		TRINITY_DN88061_c0_g1_m.22326	Q84LK3		TRINITY_DN78180_c0_g2_m.19215	CSA021739.1
TRINITY_DN64266_c0_g1_m.17574	Cluster-2961.171451		TRINITY_DN88736_c0_g1_m.22706	Q9AT17		TRINITY_DN88130_c0_g1_m.22360	Q0DP12		TRINITY_DN78381_c0_g1_m.19249	CSA011739.1
TRINITY_DN67522_c0_g1_m.17811	Cluster-2961.121248		TRINITY_DN88800_c0_g1_m.22748	P49098		TRINITY_DN88136_c0_g1_m.22361	Q0DVH3		TRINITY_DN78455_c0_g1_m.19256	CSA018288.1
TRINITY_DN67778_c0_g1_m.17831	Cluster-2961.200397		TRINITY_DN88918_c0_g1_m.22822	Q03684		TRINITY_DN88185_c0_g1_m.22394	Q6YVH4		TRINITY_DN78658_c0_g1_m.19296	CSA033458.1
TRINITY_DN68431_c0_g1_m.17871	Cluster-2961.150801		TRINITY_DN88918_c1_g1_m.22823	I7GVS5		TRINITY_DN88191_c0_g1_m.22399	Q7F8S5		TRINITY_DN78834_c0_g3_m.19326	CSA017789.1
TRINITY_DN69419_c0_g2_m.18029	Cluster-2961.151964		TRINITY_DN88918_c2_g1_m.22825	Q03685		TRINITY_DN88318_c0_g1_m.22470	Q8L4F2		TRINITY_DN78853_c0_g1_m.19329	CSA010255.1
TRINITY_DN69851_c0_g3_m.18089	Cluster-2961.147891		TRINITY_DN88921_c0_g1_m.22828	B2YKT9		TRINITY_DN88351_c0_g1_m.22489	Q9ZWF5		TRINITY_DN79233_c0_g1_m.19427	CSA007658.1
TRINITY_DN73358_c0_g1_m.18515	Cluster-2961.97100		TRINITY_DN89106_c0_g3_m.22911	A0A077D9P0		TRINITY_DN88390_c0_g1_m.22513	Q0DXV3		TRINITY_DN79262_c0_g1_m.19430	CSA014385.1
TRINITY_DN73825_c0_g1_m.18587	Cluster-2961.152844		TRINITY_DN89147_c0_g1_m.22936	Q25C91		TRINITY_DN88405_c0_g1_m.22523	Q10M57		TRINITY_DN79779_c0_g1_m.19551	CSA016462.1
TRINITY_DN73911_c0_g1_m.18592	Cluster-2961.185885		TRINITY_DN89193_c0_g1_m.22963	Q9XH13		TRINITY_DN88424_c0_g1_m.22528	Q7XBT1		TRINITY_DN79854_c0_g1_m.19563	CSA000242.1
TRINITY_DN75140_c0_g1_m.18753	Cluster-2961.148711		TRINITY_DN89275_c0_g1_m.23022	A0A077D7Q3		TRINITY_DN88462_c0_g1_m.22559	Q5JJP5		TRINITY_DN80368_c0_g1_m.19685	CSA034432.1
TRINITY_DN75629_c0_g1_m.18812	Cluster-2961.126689		TRINITY_DN89325_c0_g1_m.23058	A0A075EYQ6		TRINITY_DN88539_c0_g1_m.22591	Q9SXG0		TRINITY_DN80427_c0_g1_m.19699	CSA011778.1
TRINITY_DN75655_c0_g1_m.18814	Cluster-2961.147907		TRINITY_DN89446_c1_g1_m.23138	Q93X30		TRINITY_DN88589_c0_g1_m.22620	Q762A6		TRINITY_DN80569_c0_g1_m.19724	CSA019997.1
TRINITY_DN75765_c0_g1_m.18827	Cluster-2961.148626		TRINITY_DN89516_c1_g1_m.23179	A0A075EZS4		TRINITY_DN88668_c0_g1_m.22660	Q0IR97		TRINITY_DN80769_c0_g1_m.19767	CSA013155.1
TRINITY_DN75805_c0_g2_m.18833	Cluster-2961.124071		TRINITY_DN89667_c0_g1_m.23271	W8SRJ3		TRINITY_DN88673_c0_g1_m.22662	Q8S7T5		TRINITY_DN80778_c0_g1_m.19768	CSA036589.1
TRINITY_DN76934_c0_g1_m.19035	Cluster-2961.137417		TRINITY_DN89692_c1_g2_m.23302	A0A076L2E1		TRINITY_DN88711_c0_g1_m.22691	Q7G649		TRINITY_DN80819_c0_g1_m.19782	CSA013671.1
TRINITY_DN77008_c0_g1_m.19048	Cluster-2961.146614		TRINITY_DN89705_c0_g1_m.23309	Q9T2L9		TRINITY_DN88722_c0_g1_m.22699	Q0JIL9		TRINITY_DN80915_c0_g1_m.19802	CSA011021.1
TRINITY_DN77153_c0_g1_m.19086	Cluster-2961.144347		TRINITY_DN89820_c0_g1_m.23396	A0A076L2E2		TRINITY_DN88727_c0_g1_m.22702	Q7F8R1		TRINITY_DN81010_c0_g1_m.19826	CSA004286.1
TRINITY_DN77903_c0_g2_m.19165	Cluster-2961.146614		TRINITY_DN90034_c0_g1_m.23519	Q3LAG6		TRINITY_DN88750_c0_g1_m.22715	Q84PA4		TRINITY_DN81028_c0_g1_m.19834	CSA008878.1
TRINITY_DN78180_c0_g2_m.19215	Cluster-2961.184662		TRINITY_DN90066_c0_g1_m.23565	A0A9R6		TRINITY_DN88766_c0_g1_m.22721	Q6YTY2		TRINITY_DN81109_c0_g1_m.19854	CSA001302.1
TRINITY_DN78381_c0_g1_m.19249	Cluster-2961.172657		TRINITY_DN90121_c0_g1_m.23620	Q948K4		TRINITY_DN88918_c0_g1_m.22822	Q8GTB0		TRINITY_DN81280_c0_g1_m.19898	CSA034366.1
TRINITY_DN78455_c0_g1_m.19256	Cluster-2961.165299		TRINITY_DN90172_c0_g2_m.23664	H9CCH7		TRINITY_DN88921_c0_g1_m.22828	Q75LJ7		TRINITY_DN81346_c0_g1_m.19921	CSA009348.1
TRINITY_DN78658_c0_g1_m.19296	Cluster-2961.158213		TRINITY_DN90210_c0_g1_m.23704	O24124		TRINITY_DN89071_c0_g1_m.22902	Q850W6		TRINITY_DN81693_c0_g1_m.20003	CSA017237.1
TRINITY_DN78853_c0_g1_m.19329	Cluster-2961.97100		TRINITY_DN90232_c0_g1_m.23727	G9BRR3		TRINITY_DN89106_c0_g3_m.22911	Q7XEQ3		TRINITY_DN81727_c0_g1_m.20015	CSA009444.1
TRINITY_DN79262_c0_g1_m.19430	Cluster-2961.124318		TRINITY_DN90292_c0_g1_m.23771	A0A075EYQ6		TRINITY_DN89182_c0_g1_m.22956	Q5Z402		TRINITY_DN81786_c0_g1_m.20026	CSA002335.1
TRINITY_DN79779_c0_g1_m.19551	Cluster-2961.258637		TRINITY_DN90339_c0_g2_m.23804	I2G7N7		TRINITY_DN89275_c0_g1_m.23022	Q93WM3		TRINITY_DN81844_c0_g1_m.20039	CSA035726.1
TRINITY_DN79968_c0_g1_m.19578	Cluster-2961.84264		TRINITY_DN90459_c0_g1_m.23908	Q70Z16		TRINITY_DN89321_c0_g1_m.23055	Q9LWT6		TRINITY_DN81936_c0_g1_m.20073	CSA017664.1
TRINITY_DN80368_c0_g1_m.19685	Cluster-2961.145294		TRINITY_DN90465_c0_g1_m.23912	B6RCM0		TRINITY_DN89367_c0_g1_m.23087	Q9ZST0		TRINITY_DN82111_c0_g1_m.20118	CSA010083.1
TRINITY_DN80427_c0_g1_m.19699	Cluster-2961.133519		TRINITY_DN90471_c0_g1_m.23922	Q40493		TRINITY_DN89424_c1_g1_m.23130	Q8H4J8		TRINITY_DN82151_c0_g1_m.20122	CSA026341.1
TRINITY_DN80569_c0_g1_m.19724	Cluster-2961.91719		TRINITY_DN90642_c0_g1_m.24036	A0A076KWG3		TRINITY_DN89516_c1_g1_m.23179	Q7XZW5		TRINITY_DN82214_c0_g1_m.20144	CSA026304.1
TRINITY_DN80819_c0_g1_m.19782	Cluster-2961.156876		TRINITY_DN90721_c0_g1_m.24107	P93395		TRINITY_DN89659_c0_g1_m.23268	Q7XVF8		TRINITY_DN82380_c1_g2_m.20182	CSA011933.1
TRINITY_DN81010_c0_g1_m.19826	Cluster-2961.156217		TRINITY_DN90797_c0_g1_m.24168	Q9LLE1		TRINITY_DN89692_c1_g2_m.23302	Q851Y9		TRINITY_DN82515_c0_g1_m.20219	CSA035147.1
TRINITY_DN81028_c0_g1_m.19834	Cluster-2961.136917		TRINITY_DN90863_c0_g1_m.24230	Q9SQI5		TRINITY_DN89705_c0_g1_m.23309	Q650W6		TRINITY_DN82781_c0_g1_m.20269	CSA034189.1
TRINITY_DN81109_c0_g1_m.19854	Cluster-2961.174798		TRINITY_DN90967_c0_g1_m.24323	B2BF99		TRINITY_DN89948_c0_g1_m.23460	Q7XPV4		TRINITY_DN82929_c0_g1_m.20286	CSA023469.1
TRINITY_DN81346_c0_g1_m.19921	Cluster-2961.102995		TRINITY_DN91078_c0_g1_m.24395	A7VMP6		TRINITY_DN89951_c0_g1_m.23464	Q10FQ7		TRINITY_DN83093_c0_g1_m.20330	CSA018830.1
TRINITY_DN81786_c0_g1_m.20026	Cluster-2961.132489		TRINITY_DN91089_c2_g1_m.24406	P51845		TRINITY_DN89983_c0_g4_m.23490	Q7XJX6		TRINITY_DN83139_c0_g1_m.20368	CSA010085.1
TRINITY_DN81844_c0_g1_m.20039	Cluster-2961.129473		TRINITY_DN91089_c2_g1_m.24408	P51845		TRINITY_DN90034_c0_g1_m.23519	Q5JNB0		TRINITY_DN83210_c0_g1_m.20393	CSA016470.1
TRINITY_DN81936_c0_g1_m.20073	Cluster-2961.132489		TRINITY_DN91098_c0_g1_m.24420	Q5DNZ6		TRINITY_DN90066_c0_g1_m.23565	Q7XUC9		TRINITY_DN83219_c0_g2_m.20398	CSA026793.1
TRINITY_DN81995_c0_g1_m.20084	Cluster-2961.142189		TRINITY_DN91110_c1_g1_m.24430	A0A076KX89		TRINITY_DN90075_c0_g1_m.23577	Q10Q21		TRINITY_DN83248_c0_g1_m.20411	CSA026696.1
TRINITY_DN82111_c0_g1_m.20118	Cluster-2961.148070		TRINITY_DN91227_c0_g1_m.24517	Q40589		TRINITY_DN90083_c0_g1_m.23589	Q8H3Q7		TRINITY_DN83266_c0_g1_m.20420	CSA010446.1
TRINITY_DN82151_c0_g1_m.20122	Cluster-2961.159253		TRINITY_DN91238_c0_g2_m.24530	A0A076L2E7		TRINITY_DN90084_c0_g1_m.23590	Q0DR25		TRINITY_DN83486_c0_g1_m.20488	CSA019423.1
TRINITY_DN82214_c0_g1_m.20144	Cluster-2961.97100		TRINITY_DN91264_c0_g1_m.24566	Q42951		TRINITY_DN90114_c0_g2_m.23616	Q6ZC64		TRINITY_DN83544_c0_g1_m.20500	CSA031822.1
TRINITY_DN82380_c1_g2_m.20182	Cluster-2961.141530		TRINITY_DN91364_c1_g1_m.24671	Q9XG67		TRINITY_DN90142_c0_g1_m.23637	Q8H2T7		TRINITY_DN83548_c0_g1_m.20503	CSA011621.1
TRINITY_DN82515_c0_g1_m.20219	Cluster-2961.92975		TRINITY_DN91436_c0_g1_m.24722	Q7XZV3		TRINITY_DN90210_c0_g1_m.23704	Q0JPA6		TRINITY_DN83574_c0_g1_m.20510	CSA035110.1
TRINITY_DN83093_c0_g1_m.20330	Cluster-2961.71390		TRINITY_DN91443_c0_g2_m.24728	A8J6V0		TRINITY_DN90232_c0_g1_m.23727	Q69XJ4		TRINITY_DN83851_c0_g1_m.20609	CSA001605.1
TRINITY_DN83139_c0_g1_m.20368	Cluster-2961.47802		TRINITY_DN91467_c1_g1_m.24747	Q8H0G7		TRINITY_DN90397_c0_g1_m.23857	Q653V9		TRINITY_DN83974_c0_g1_m.20659	CSA007125.1
TRINITY_DN83210_c0_g1_m.20393	Cluster-2961.132576		TRINITY_DN91518_c0_g1_m.24800	Q40462		TRINITY_DN90456_c0_g1_m.23902	Q2QN86		TRINITY_DN83980_c0_g1_m.20661	CSA012185.1
TRINITY_DN83219_c0_g2_m.20398	Cluster-2961.65230		TRINITY_DN91569_c0_g1_m.24849	Q84UH4		TRINITY_DN90459_c0_g1_m.23908	Q5VND6		TRINITY_DN84036_c0_g1_m.20684	CSA032695.1
TRINITY_DN83266_c0_g1_m.20420	Cluster-2961.149726		TRINITY_DN91578_c0_g1_m.24860	Q76MF3		TRINITY_DN90546_c1_g1_m.23968	A3BLC3		TRINITY_DN84142_c0_g1_m.20714	CSA003234.1
TRINITY_DN83309_c0_g1_m.20443	Cluster-2961.158232		TRINITY_DN91578_c1_g1_m.24862	Q76MF3		TRINITY_DN90634_c0_g1_m.24026	Q6ZHS6		TRINITY_DN84161_c0_g1_m.20721	CSA023208.1
TRINITY_DN83486_c0_g1_m.20488	Cluster-2961.151447		TRINITY_DN91647_c1_g1_m.24911	Q8W1L3		TRINITY_DN90642_c0_g1_m.24036	Q5JK10		TRINITY_DN84206_c0_g1_m.20724	CSA030198.1
TRINITY_DN83544_c0_g1_m.20500	Cluster-2961.158058		TRINITY_DN91672_c0_g2_m.24937	A0A076KWH0		TRINITY_DN90703_c0_g1_m.24089	Q2QND6		TRINITY_DN84253_c0_g1_m.20747	CSA021528.1
TRINITY_DN83574_c0_g1_m.20510	Cluster-2961.112668		TRINITY_DN91677_c1_g1_m.24945	Q8H0G7		TRINITY_DN90760_c1_g1_m.24134	Q67W57		TRINITY_DN84330_c0_g1_m.20763	CSA004535.1
TRINITY_DN83653_c0_g1_m.20532	Cluster-2961.96749		TRINITY_DN91703_c1_g1_m.24965	Q93X35		TRINITY_DN90769_c0_g1_m.24141	Q0IQF7		TRINITY_DN84369_c0_g1_m.20773	CSA027795.1
TRINITY_DN83851_c0_g1_m.20609	Cluster-2961.117454		TRINITY_DN91723_c0_g1_m.24978	Q8SF03		TRINITY_DN90773_c0_g1_m.24146	Q94J17		TRINITY_DN84490_c0_g1_m.20804	CSA035340.1
TRINITY_DN83861_c0_g1_m.20612	Cluster-2961.266907		TRINITY_DN91844_c6_g2_m.25075	Q9SQ56		TRINITY_DN91011_c0_g1_m.24349	Q6ETQ7		TRINITY_DN85299_c0_g1_m.21058	CSA005011.1
TRINITY_DN84036_c0_g1_m.20684	Cluster-2961.284794		TRINITY_DN91975_c0_g1_m.25203	Q8W506		TRINITY_DN91078_c0_g1_m.24395	Q2RAD9		TRINITY_DN85307_c0_g1_m.21064	CSA016596.1
TRINITY_DN84161_c0_g1_m.20721	Cluster-2961.97100		TRINITY_DN92021_c0_g1_m.25233	F5BFT0		TRINITY_DN91142_c0_g1_m.24452	Q6H7I9		TRINITY_DN85575_c0_g3_m.21159	CSA001605.1
TRINITY_DN84206_c0_g1_m.20724	Cluster-2961.224551		TRINITY_DN92099_c0_g1_m.25317	Q93X39		TRINITY_DN91181_c0_g1_m.24482	Q0JJ25		TRINITY_DN85598_c0_g2_m.21173	CSA023915.1
TRINITY_DN84253_c0_g1_m.20747	Cluster-2961.149192		TRINITY_DN92120_c0_g1_m.25332	P35494		TRINITY_DN91216_c0_g1_m.24512	Q10Q40		TRINITY_DN85679_c0_g1_m.21216	CSA018493.1
TRINITY_DN84369_c0_g1_m.20773	Cluster-2961.127782		TRINITY_DN92162_c0_g1_m.25376	Q9ZT13		TRINITY_DN91227_c0_g1_m.24517	Q10N21		TRINITY_DN85915_c0_g1_m.21317	CSA008278.1
TRINITY_DN85299_c0_g1_m.21058	Cluster-2961.156876		TRINITY_DN92204_c0_g2_m.25413	Q8VWF9		TRINITY_DN91238_c0_g2_m.24530	Q0IPE5		TRINITY_DN86124_c0_g9_m.21429	CSA023347.1
TRINITY_DN85575_c0_g3_m.21159	Cluster-2961.174383		TRINITY_DN92224_c0_g1_m.25434	Q07761		TRINITY_DN91264_c0_g1_m.24566	Q0DXS9		TRINITY_DN86137_c0_g1_m.21438	CSA006668.1
TRINITY_DN85598_c0_g2_m.21173	Cluster-2961.162994		TRINITY_DN92233_c0_g1_m.25449	O24511		TRINITY_DN91355_c0_g1_m.24662	Q0DRP7		TRINITY_DN86234_c0_g1_m.21482	CSA032978.1
TRINITY_DN86124_c0_g9_m.21429	Cluster-2961.155563		TRINITY_DN92242_c1_g1_m.25455	C3RXI5		TRINITY_DN91364_c1_g1_m.24671	Q7FAH2		TRINITY_DN86237_c0_g1_m.21484	CSA014514.1
TRINITY_DN86244_c1_g1_m.21489	Cluster-2961.130949		TRINITY_DN92256_c0_g1_m.25468	O04977		TRINITY_DN91464_c5_g1_m.24746	Q7X8A2		TRINITY_DN86269_c0_g1_m.21504	CSA032885.1
TRINITY_DN86269_c0_g1_m.21504	Cluster-2961.112357		TRINITY_DN92285_c1_g3_m.25491	A0A077DCK9		TRINITY_DN91569_c0_g1_m.24849	Q65XA0		TRINITY_DN86340_c0_g1_m.21519	CSA032834.1
TRINITY_DN86340_c0_g1_m.21519	Cluster-2961.150469		TRINITY_DN92302_c0_g1_m.25516	Q42954		TRINITY_DN91578_c0_g1_m.24860	Q6F332		TRINITY_DN86360_c0_g1_m.21532	CSA036916.1
TRINITY_DN86365_c0_g1_m.21537	Cluster-2961.152844		TRINITY_DN92302_c0_g2_m.25518	Q42954		TRINITY_DN91723_c0_g1_m.24978	Q53PA7		TRINITY_DN86365_c0_g1_m.21537	CSA020166.1
TRINITY_DN86416_c0_g1_m.21571	Cluster-2961.202525		TRINITY_DN92372_c0_g3_m.25578	Q38PK4		TRINITY_DN91797_c0_g1_m.25035	Q6ZEZ1		TRINITY_DN86416_c0_g1_m.21571	CSA033994.1
TRINITY_DN86435_c0_g1_m.21578	Cluster-2961.167379		TRINITY_DN92383_c0_g1_m.25588	A0A139ZSG9		TRINITY_DN91844_c6_g2_m.25075	Q8W0D1		TRINITY_DN86442_c0_g2_m.21581	CSA036462.1
TRINITY_DN86663_c0_g1_m.21692	Cluster-2961.217263		TRINITY_DN92404_c0_g2_m.25610	Q93X32		TRINITY_DN91975_c0_g1_m.25203	Q7XLR1		TRINITY_DN86513_c0_g1_m.21621	CSA035969.1
TRINITY_DN86703_c0_g1_m.21707	Cluster-2961.165779		TRINITY_DN92520_c0_g1_m.25730	Q9T2L8		TRINITY_DN91989_c0_g1_m.25210	Q10LV7		TRINITY_DN86522_c0_g1_m.21628	CSA020913.1
TRINITY_DN87019_c0_g1_m.21856	Cluster-2961.174383		TRINITY_DN92536_c1_g1_m.25744	Q8W1L4		TRINITY_DN92060_c0_g1_m.25274	Q8LQ41		TRINITY_DN86584_c0_g1_m.21646	CSA000547.1
TRINITY_DN87101_c0_g1_m.21894	Cluster-2961.97100		TRINITY_DN92546_c0_g1_m.25754	Q84QE7		TRINITY_DN92064_c2_g1_m.25276	Q5W6H1		TRINITY_DN86752_c0_g1_m.21719	CSA015506.1
TRINITY_DN87167_c0_g1_m.21928	Cluster-2961.278192		TRINITY_DN92553_c0_g1_m.25763	Q9T2L8		TRINITY_DN92082_c0_g1_m.25300	Q6YZK5		TRINITY_DN86809_c0_g1_m.21753	CSA014370.1
TRINITY_DN87266_c0_g1_m.21965	Cluster-2961.130569		TRINITY_DN92584_c0_g1_m.25785	D6P3J0		TRINITY_DN92120_c0_g1_m.25332	Q5KQH5		TRINITY_DN87004_c0_g1_m.21850	CSA018613.1
TRINITY_DN87321_c0_g3_m.21991	Cluster-2961.85175		TRINITY_DN92625_c0_g1_m.25830	P93376		TRINITY_DN92162_c0_g1_m.25376	Q75GT3		TRINITY_DN87019_c0_g1_m.21856	CSA001605.1
TRINITY_DN87616_c0_g1_m.22101	Cluster-2961.147891		TRINITY_DN92644_c0_g1_m.25838	Q40462		TRINITY_DN92233_c0_g1_m.25449	Q0E4K1		TRINITY_DN87101_c0_g1_m.21894	CSA018101.1
TRINITY_DN87616_c0_g2_m.22103	Cluster-2961.147891		TRINITY_DN92664_c0_g1_m.25852	A8UDS9		TRINITY_DN92242_c1_g1_m.25455	Q5VNW1		TRINITY_DN87110_c0_g1_m.21898	CSA025573.1
TRINITY_DN87640_c0_g1_m.22117	Cluster-2961.146058		TRINITY_DN92685_c0_g1_m.25868	Q40512		TRINITY_DN92256_c0_g1_m.25468	Q6ZFJ3		TRINITY_DN87114_c0_g1_m.21904	CSA022953.1
TRINITY_DN87654_c0_g1_m.22133	Cluster-2961.152137		TRINITY_DN92694_c0_g1_m.25877	Q8VZH4		TRINITY_DN92293_c0_g2_m.25503	Q6ZL81		TRINITY_DN87172_c0_g1_m.21930	CSA036561.1
TRINITY_DN87658_c0_g1_m.22136	Cluster-2961.155563		TRINITY_DN92720_c0_g1_m.25905	B5TWD2		TRINITY_DN92294_c0_g1_m.25504	Q9XJ28		TRINITY_DN87597_c0_g1_m.22092	CSA018751.1
TRINITY_DN87689_c0_g1_m.22149	Cluster-2961.174422		TRINITY_DN92812_c0_g2_m.25989	Q0PWS7		TRINITY_DN92404_c0_g2_m.25610	Q9LST6		TRINITY_DN87602_c0_g1_m.22098	CSA020913.1
TRINITY_DN87699_c0_g1_m.22158	Cluster-2961.4063		TRINITY_DN92861_c0_g2_m.26039	Q6QND3		TRINITY_DN92461_c0_g1_m.25670	Q10MK5		TRINITY_DN87616_c0_g1_m.22101	CSA030173.1
TRINITY_DN87721_c0_g1_m.22164	Cluster-2961.266907		TRINITY_DN92886_c0_g1_m.26068	O81390		TRINITY_DN92499_c0_g1_m.25713	Q0DJB9		TRINITY_DN87616_c0_g2_m.22103	CSA029484.1
TRINITY_DN87747_c0_g1_m.22183	Cluster-2961.145749		TRINITY_DN92894_c2_g1_m.26078	O04397		TRINITY_DN92569_c0_g1_m.25774	Q6EPY8		TRINITY_DN87639_c0_g1_m.22116	CSA035382.1
TRINITY_DN87780_c0_g1_m.22194	Cluster-2961.145793		TRINITY_DN92920_c0_g1_m.26114	P40691		TRINITY_DN92664_c0_g1_m.25852	Q0DRV6		TRINITY_DN87640_c0_g1_m.22117	CSA004909.1
TRINITY_DN87790_c1_g1_m.22199	Cluster-2961.133674		TRINITY_DN92935_c1_g1_m.26127	P41919		TRINITY_DN92678_c1_g1_m.25861	Q6H444		TRINITY_DN87654_c0_g1_m.22133	CSA031519.1
TRINITY_DN87862_c0_g1_m.22242	Cluster-2961.184662		TRINITY_DN92964_c0_g1_m.26151	Q04126		TRINITY_DN92685_c0_g1_m.25868	Q5ZA98		TRINITY_DN87665_c0_g1_m.22137	CSA031677.1
TRINITY_DN87869_c0_g1_m.22244	Cluster-2961.155563		TRINITY_DN93015_c0_g1_m.26197	Q40460		TRINITY_DN92746_c0_g1_m.25927	Q10MW8		TRINITY_DN87684_c0_g1_m.22148	CSA029276.1
TRINITY_DN87886_c0_g1_m.22253	Cluster-2961.90029		TRINITY_DN93026_c1_g1_m.26210	A0A077DCK3		TRINITY_DN92782_c0_g1_m.25965	Q2QSR7		TRINITY_DN87689_c0_g1_m.22149	CSA011175.1
TRINITY_DN87916_c0_g1_m.22279	Cluster-2961.153724		TRINITY_DN93054_c1_g1_m.26234	Q9XEN8		TRINITY_DN92812_c0_g2_m.25989	Q6Z411		TRINITY_DN87721_c0_g1_m.22164	CSA000028.1
TRINITY_DN87936_c0_g1_m.22285	Cluster-2961.145037		TRINITY_DN93166_c0_g1_m.26337	V9TI00		TRINITY_DN92814_c0_g1_m.25991	Q10B01		TRINITY_DN87731_c1_g1_m.22167	CSA027795.1
TRINITY_DN88061_c0_g1_m.22326	Cluster-2961.145294		TRINITY_DN93236_c1_g1_m.26407	Q8W3Z7		TRINITY_DN92849_c0_g1_m.26028	Q0ILV0		TRINITY_DN87747_c0_g1_m.22183	CSA017238.1
TRINITY_DN88191_c0_g1_m.22399	Cluster-2961.65230		TRINITY_DN93312_c0_g1_m.26501	Q8RVF9		TRINITY_DN92879_c0_g2_m.26063	Q6K3S8		TRINITY_DN87776_c0_g1_m.22193	CSA022953.1
TRINITY_DN88317_c0_g1_m.22469	Cluster-2961.147283		TRINITY_DN93401_c0_g1_m.26593	Q8L6J9		TRINITY_DN92886_c0_g1_m.26068	Q0D634		TRINITY_DN87790_c1_g1_m.22199	CSA006542.1
TRINITY_DN88372_c0_g1_m.22502	Cluster-2961.141050		TRINITY_DN93402_c0_g1_m.26596	Q8W1L4		TRINITY_DN92907_c0_g1_m.26099	Q0JDN5		TRINITY_DN87862_c0_g1_m.22242	CSA025511.1
TRINITY_DN88391_c0_g1_m.22514	Cluster-2961.104107		TRINITY_DN93435_c0_g2_m.26640	P25317		TRINITY_DN92920_c0_g1_m.26114	Q0JE28		TRINITY_DN87869_c0_g1_m.22244	CSA020314.1
TRINITY_DN88405_c0_g1_m.22523	Cluster-2961.165302		TRINITY_DN93500_c0_g1_m.26712	O22402		TRINITY_DN92935_c1_g1_m.26127	Q7GD79		TRINITY_DN87878_c0_g1_m.22249	CSA033430.1
TRINITY_DN88412_c0_g1_m.22524	Cluster-2961.172657		TRINITY_DN93515_c0_g1_m.26724	Q56E62		TRINITY_DN92956_c0_g1_m.26146	Q6K471		TRINITY_DN87886_c0_g1_m.22253	CSA033761.1
TRINITY_DN88475_c0_g1_m.22566	Cluster-2961.147891		TRINITY_DN93563_c0_g10_m.26794	A0A0K0XR76		TRINITY_DN92964_c0_g1_m.26151	Q8GTK4		TRINITY_DN87897_c0_g1_m.22265	CSA011621.1
TRINITY_DN88603_c1_g1_m.22627	Cluster-2961.155563		TRINITY_DN93605_c0_g1_m.26848	Q75U98		TRINITY_DN93015_c0_g1_m.26197	P93431		TRINITY_DN87916_c0_g1_m.22279	CSA034831.1
TRINITY_DN88612_c0_g1_m.22631	Cluster-2961.143655		TRINITY_DN93616_c0_g1_m.26863	P93344		TRINITY_DN93020_c0_g1_m.26205	Q10MD5		TRINITY_DN87936_c0_g1_m.22285	CSA033864.1
TRINITY_DN88657_c0_g1_m.22651	Cluster-2961.126322		TRINITY_DN93720_c1_g1_m.26996	Q53UI6		TRINITY_DN93026_c1_g1_m.26210	Q7XBR2		TRINITY_DN88185_c0_g1_m.22394	CSA029626.1
TRINITY_DN88668_c0_g1_m.22660	Cluster-2961.146064		TRINITY_DN93722_c0_g1_m.26997	Q84P56		TRINITY_DN93053_c0_g2_m.26233	A3BKF2		TRINITY_DN88191_c0_g1_m.22399	CSA027825.1
TRINITY_DN88673_c0_g1_m.22662	Cluster-2961.202359		TRINITY_DN93776_c0_g1_m.27066	A0A059TCI1		TRINITY_DN93061_c0_g1_m.26239	C7J066		TRINITY_DN88222_c0_g1_m.22415	CSA000242.1
TRINITY_DN88711_c0_g1_m.22691	Cluster-2961.172525		TRINITY_DN93867_c0_g1_m.27171	T2BQ67		TRINITY_DN93218_c0_g1_m.26392	Q6K674		TRINITY_DN88317_c0_g1_m.22469	CSA020587.1
TRINITY_DN88727_c0_g1_m.22702	Cluster-2961.151916		TRINITY_DN93918_c0_g1_m.27224	Q9T2L8		TRINITY_DN93236_c1_g1_m.26407	Q93X08		TRINITY_DN88318_c0_g1_m.22470	CSA012976.1
TRINITY_DN88730_c0_g1_m.22704	Cluster-2961.102995		TRINITY_DN93972_c0_g1_m.27285	A0A076L1Z7		TRINITY_DN93401_c0_g1_m.26593	B9EXM2		TRINITY_DN88351_c0_g1_m.22489	CSA000480.1
TRINITY_DN88739_c0_g1_m.22711	Cluster-2961.148809		TRINITY_DN93980_c0_g1_m.27294	F2VJ74		TRINITY_DN93424_c0_g1_m.26625	Q75H72		TRINITY_DN88372_c0_g1_m.22502	CSA027368.1
TRINITY_DN88750_c0_g1_m.22715	Cluster-2961.145901		TRINITY_DN93985_c0_g1_m.27299	W8SGD9		TRINITY_DN93487_c0_g1_m.26696	Q75GK3		TRINITY_DN88390_c0_g1_m.22513	CSA007658.1
TRINITY_DN88766_c0_g1_m.22721	Cluster-2961.141632		TRINITY_DN93986_c0_g1_m.27300	O82150		TRINITY_DN93500_c0_g1_m.26712	Q688K0		TRINITY_DN88391_c0_g1_m.22514	CSA010192.1
TRINITY_DN88918_c0_g1_m.22822	Cluster-2961.68493		TRINITY_DN93988_c2_g1_m.27309	Q9ZRE1		TRINITY_DN93515_c0_g1_m.26724	Q7XC37		TRINITY_DN88405_c0_g1_m.22523	CSA027096.1
TRINITY_DN88918_c1_g1_m.22823	Cluster-2961.151595		TRINITY_DN94008_c0_g1_m.27326	A0A075F2H4		TRINITY_DN93591_c0_g1_m.26830	Q652L5		TRINITY_DN88412_c0_g1_m.22524	CSA011739.1
TRINITY_DN88918_c2_g1_m.22825	Cluster-2961.68493		TRINITY_DN94182_c2_g1_m.27513	Q9SMB4		TRINITY_DN93605_c0_g1_m.26848	Q6KAJ2		TRINITY_DN88462_c0_g1_m.22559	CSA015797.1
TRINITY_DN88921_c0_g1_m.22828	Cluster-2961.202191		TRINITY_DN94238_c0_g1_m.27588	Q84TM7		TRINITY_DN93615_c0_g10_m.26862	Q2QX58		TRINITY_DN88475_c0_g1_m.22566	CSA029484.1
TRINITY_DN89024_c0_g1_m.22879	Cluster-2961.141661		TRINITY_DN94270_c0_g1_m.27619	Q9ZRE1		TRINITY_DN93616_c0_g1_m.26863	Q9LRE9		TRINITY_DN88487_c0_g1_m.22575	CSA018496.1
TRINITY_DN89071_c0_g1_m.22902	Cluster-2961.147437		TRINITY_DN94276_c0_g2_m.27625	P27141		TRINITY_DN93690_c0_g1_m.26952	Q7XMJ1		TRINITY_DN88539_c0_g1_m.22591	CSA006880.1
TRINITY_DN89077_c0_g1_m.22903	Cluster-2961.256356		TRINITY_DN94338_c0_g1_m.27710	Q02585		TRINITY_DN93720_c1_g1_m.26996	Q0D5P8		TRINITY_DN88589_c0_g1_m.22620	CSA007565.1
TRINITY_DN89106_c0_g3_m.22911	Cluster-2961.150437		TRINITY_DN94362_c0_g1_m.27735	Q9ZP50		TRINITY_DN93763_c1_g1_m.27049	Q8GSE8		TRINITY_DN88603_c1_g1_m.22627	CSA029877.1
TRINITY_DN89321_c0_g1_m.23055	Cluster-2961.23860		TRINITY_DN94449_c2_g1_m.27862	Q6TKR0		TRINITY_DN93776_c0_g1_m.27066	Q0JNR2		TRINITY_DN88609_c0_g1_m.22630	CSA027186.1
TRINITY_DN89325_c0_g1_m.23058	Cluster-2961.136917		TRINITY_DN94453_c1_g2_m.27864	Q42962		TRINITY_DN93790_c1_g1_m.27085	Q0DJF9		TRINITY_DN88612_c0_g1_m.22631	CSA006550.1
TRINITY_DN89367_c0_g1_m.23087	Cluster-2961.104352		TRINITY_DN94529_c0_g1_m.27959	C5J0G6		TRINITY_DN93893_c3_g1_m.27195	Q0J9Q1		TRINITY_DN88657_c0_g1_m.22651	CSA028166.1
TRINITY_DN89424_c1_g1_m.23130	Cluster-2961.124274		TRINITY_DN94577_c0_g1_m.27995	A0A076KXA6		TRINITY_DN93918_c0_g1_m.27224	Q0D7K9		TRINITY_DN88668_c0_g1_m.22660	CSA023573.1
TRINITY_DN89446_c1_g1_m.23138	Cluster-2961.140279		TRINITY_DN94662_c0_g1_m.28114	P93344		TRINITY_DN93972_c0_g1_m.27285	Q9AY51		TRINITY_DN88673_c0_g1_m.22662	CSA016957.1
TRINITY_DN89516_c1_g1_m.23179	Cluster-2961.207437		TRINITY_DN94774_c1_g1_m.28226	Q285L8		TRINITY_DN93980_c0_g1_m.27294	Q0DKX3		TRINITY_DN88702_c0_g1_m.22681	CSA005599.1
TRINITY_DN89576_c0_g1_m.23205	Cluster-2961.178928		TRINITY_DN94800_c0_g1_m.28264	A0A077DCL2		TRINITY_DN93986_c0_g1_m.27300	Q5Z974		TRINITY_DN88727_c0_g1_m.22702	CSA017504.1
TRINITY_DN89667_c0_g1_m.23271	Cluster-2961.202525		TRINITY_DN94807_c0_g1_m.28268	Q42953		TRINITY_DN94046_c0_g1_m.27370	Q53LQ0		TRINITY_DN88729_c0_g1_m.22703	CSA017146.1
TRINITY_DN89948_c0_g1_m.23460	Cluster-2961.141155		TRINITY_DN94807_c0_g2_m.28273	Q42953		TRINITY_DN94101_c0_g1_m.27429	Q6AVZ3		TRINITY_DN88730_c0_g1_m.22704	CSA028143.1
TRINITY_DN89953_c0_g1_m.23466	Cluster-2961.122820		TRINITY_DN94818_c0_g8_m.28285	A7VMP6		TRINITY_DN94143_c0_g1_m.27480	Q84PB3		TRINITY_DN88739_c0_g1_m.22711	CSA031259.1
TRINITY_DN90034_c0_g1_m.23519	Cluster-2961.165440		TRINITY_DN94819_c0_g1_m.28287	Q93X38		TRINITY_DN94182_c2_g1_m.27513	Q943K1		TRINITY_DN88750_c0_g1_m.22715	CSA009759.1
TRINITY_DN90075_c0_g1_m.23577	Cluster-2961.142531		TRINITY_DN94923_c0_g1_m.28402	A0A067YF53		TRINITY_DN94270_c0_g1_m.27619	Q5W730		TRINITY_DN88766_c0_g1_m.22721	CSA015792.1
TRINITY_DN90083_c0_g1_m.23589	Cluster-2961.159541		TRINITY_DN94951_c0_g1_m.28431	Q8W3Z6		TRINITY_DN94272_c0_g1_m.27621	Q9FWV2		TRINITY_DN88918_c0_g1_m.22822	CSA027456.1
TRINITY_DN90114_c0_g2_m.23616	Cluster-2961.54184		TRINITY_DN94972_c1_g2_m.28453	Q8H0G7		TRINITY_DN94312_c0_g1_m.27668	Q9FU74		TRINITY_DN88918_c1_g1_m.22823	CSA027456.1
TRINITY_DN90121_c0_g1_m.23620	Cluster-2961.147891		TRINITY_DN94985_c0_g1_m.28471	E5KCJ8		TRINITY_DN94362_c0_g1_m.27735	Q655S1		TRINITY_DN88918_c2_g1_m.22825	CSA027456.1
TRINITY_DN90172_c0_g2_m.23664	Cluster-2961.84264		TRINITY_DN95012_c0_g1_m.28504	Q852R8		TRINITY_DN94368_c1_g1_m.27746	Q6Z6B5		TRINITY_DN88921_c0_g1_m.22828	CSA031117.1
TRINITY_DN90210_c0_g1_m.23704	Cluster-2961.162645		TRINITY_DN95043_c2_g1_m.28543	Q006Q0		TRINITY_DN94449_c2_g1_m.27862	Q53JG0		TRINITY_DN88954_c0_g1_m.22846	CSA021623.1
TRINITY_DN90267_c1_g1_m.23756	Cluster-2961.131285		TRINITY_DN95079_c0_g1_m.28595	P93358		TRINITY_DN94453_c1_g2_m.27864	Q6H6C7		TRINITY_DN89071_c0_g1_m.22902	CSA036364.1
TRINITY_DN90292_c0_g1_m.23771	Cluster-2961.136917		TRINITY_DN95110_c2_g1_m.28645	B6V765		TRINITY_DN94470_c0_g1_m.27881	Q6AVA8		TRINITY_DN89082_c0_g1_m.22905	CSA036160.1
TRINITY_DN90397_c0_g1_m.23857	Cluster-2961.140296		TRINITY_DN95130_c0_g3_m.28664	B6VRE8		TRINITY_DN94529_c0_g1_m.27959	Q42971		TRINITY_DN89106_c0_g3_m.22911	CSA024512.1
TRINITY_DN90465_c0_g1_m.23912	Cluster-2961.158058		TRINITY_DN95140_c0_g1_m.28676	Q40521		TRINITY_DN94577_c0_g1_m.27995	Q6YU90		TRINITY_DN89147_c0_g1_m.22936	CSA003432.1
TRINITY_DN90471_c0_g1_m.23922	Cluster-2961.132489		TRINITY_DN95157_c0_g1_m.28698	A0A0A8J4Z6		TRINITY_DN94595_c0_g1_m.28019	Q6ZFJ5		TRINITY_DN89199_c0_g1_m.22968	CSA031718.1
TRINITY_DN90476_c0_g1_m.23924	Cluster-2961.222659		TRINITY_DN95223_c0_g1_m.28801	Q8W402		TRINITY_DN94632_c0_g1_m.28069	Q8S3R2		TRINITY_DN89275_c0_g1_m.23022	CSA029632.1
TRINITY_DN90546_c1_g1_m.23968	Cluster-2961.180646		TRINITY_DN95236_c2_g1_m.28822	Q40501		TRINITY_DN94636_c0_g1_m.28074	Q10D68		TRINITY_DN89277_c0_g2_m.23023	CSA020637.1
TRINITY_DN90703_c0_g1_m.24089	Cluster-2961.215216		TRINITY_DN95251_c0_g1_m.28842	P30359		TRINITY_DN94637_c0_g1_m.28076	Q0JL44		TRINITY_DN89321_c0_g1_m.23055	CSA036590.1
TRINITY_DN90705_c0_g1_m.24093	Cluster-2961.141893		TRINITY_DN95308_c0_g1_m.28928	Q42946		TRINITY_DN94639_c0_g2_m.28077	Q0DY33		TRINITY_DN89325_c0_g1_m.23058	CSA008878.1
TRINITY_DN90721_c0_g1_m.24107	Cluster-2961.266907		TRINITY_DN95347_c0_g1_m.28988	Q93X33		TRINITY_DN94662_c0_g1_m.28114	Q9FRX7		TRINITY_DN89367_c0_g1_m.23087	CSA029227.1
TRINITY_DN90769_c0_g1_m.24141	Cluster-2961.152986		TRINITY_DN95351_c0_g1_m.28994	Q1W375		TRINITY_DN94774_c1_g1_m.28226	Q10QD8		TRINITY_DN89516_c1_g1_m.23179	CSA009850.1
TRINITY_DN90797_c0_g1_m.24168	Cluster-2961.161497		TRINITY_DN95363_c0_g1_m.29006	C3RXI5		TRINITY_DN94790_c0_g1_m.28249	Q2QVG9		TRINITY_DN89659_c0_g1_m.23268	CSA001757.1
TRINITY_DN90837_c0_g1_m.24207	Cluster-2961.142881		TRINITY_DN95368_c0_g1_m.29023	E1U7Y4		TRINITY_DN94800_c0_g1_m.28264	Q0D3W6		TRINITY_DN89667_c0_g1_m.23271	CSA033994.1
TRINITY_DN90863_c0_g1_m.24230	Cluster-2961.155563		TRINITY_DN95369_c0_g1_m.29026	G5ELZ2		TRINITY_DN94820_c0_g1_m.28290	Q7XSS2		TRINITY_DN89692_c1_g2_m.23302	CSA003234.1
TRINITY_DN90945_c0_g1_m.24299	Cluster-2961.219362		TRINITY_DN95389_c0_g1_m.29051	A2SXR4		TRINITY_DN94862_c0_g1_m.28333	Q6ZG90		TRINITY_DN89705_c0_g1_m.23309	CSA025121.1
TRINITY_DN90947_c0_g1_m.24301	Cluster-2961.252778		TRINITY_DN95396_c0_g1_m.29065	U3PLK3		TRINITY_DN94868_c0_g1_m.28339	Q5VQX1		TRINITY_DN89820_c0_g1_m.23396	CSA011441.1
TRINITY_DN90960_c0_g1_m.24318	Cluster-2961.172872		TRINITY_DN95396_c1_g1_m.29067	U3PLK3		TRINITY_DN94923_c0_g1_m.28402	Q6F354		TRINITY_DN90034_c0_g1_m.23519	CSA015476.1
TRINITY_DN90967_c0_g1_m.24323	Cluster-2961.132489		TRINITY_DN95396_c2_g1_m.29069	U3PLK3		TRINITY_DN94951_c0_g1_m.28431	Q9AUQ4		TRINITY_DN90066_c0_g1_m.23565	CSA035141.1
TRINITY_DN90996_c0_g2_m.24338	Cluster-2961.129856		TRINITY_DN95411_c1_g2_m.29092	J7EQB2		TRINITY_DN95012_c0_g1_m.28504	Q6Z5N4		TRINITY_DN90075_c0_g1_m.23577	CSA009913.1
TRINITY_DN91011_c0_g1_m.24349	Cluster-2961.160513		TRINITY_DN95456_c0_g1_m.29175	P09043		TRINITY_DN95043_c2_g1_m.28543	Q0JJQ7		TRINITY_DN90084_c0_g1_m.23590	CSA036160.1
TRINITY_DN91078_c0_g1_m.24395	Cluster-2961.187853		TRINITY_DN95459_c0_g1_m.29179	E2F3S9		TRINITY_DN95079_c0_g1_m.28595	Q942L2		TRINITY_DN90121_c0_g1_m.23620	CSA029484.1
TRINITY_DN91098_c0_g1_m.24420	Cluster-2961.147823		TRINITY_DN95475_c0_g1_m.29199	B2LT58		TRINITY_DN95140_c0_g1_m.28676	Q75IJ1		TRINITY_DN90172_c0_g2_m.23664	CSA001786.1
TRINITY_DN91143_c0_g1_m.24453	Cluster-2961.128535		TRINITY_DN95525_c0_g1_m.29253	I6XTQ3		TRINITY_DN95223_c0_g1_m.28801	P30298		TRINITY_DN90204_c1_g1_m.23698	CSA032366.1
TRINITY_DN91227_c0_g1_m.24517	Cluster-2961.145749		TRINITY_DN95586_c1_g1_m.29350	P49098		TRINITY_DN95226_c0_g2_m.28807	Q6Z8F4		TRINITY_DN90210_c0_g1_m.23704	CSA018967.1
TRINITY_DN91355_c0_g1_m.24662	Cluster-2961.148806		TRINITY_DN95632_c0_g1_m.29413	A7XAQ5		TRINITY_DN95369_c0_g1_m.29026	Q7F1F2		TRINITY_DN90251_c0_g1_m.23745	CSA005807.1
TRINITY_DN91364_c1_g1_m.24671	Cluster-2961.154227		TRINITY_DN95650_c0_g1_m.29434	Q40520		TRINITY_DN95396_c2_g1_m.29069	Q6K669		TRINITY_DN90267_c1_g1_m.23756	CSA025432.1
TRINITY_DN91404_c0_g1_m.24700	Cluster-2961.137678		TRINITY_DN95671_c6_g1_m.29456	A0A140G1S2		TRINITY_DN95456_c0_g1_m.29175	Q7X8A1		TRINITY_DN90283_c0_g2_m.23767	CSA012375.1
TRINITY_DN91436_c0_g1_m.24722	Cluster-2961.284794		TRINITY_DN95671_c6_g1_m.29458	P00834		TRINITY_DN95457_c0_g1_m.29177	Q5JK78		TRINITY_DN90292_c0_g1_m.23771	CSA008878.1
TRINITY_DN91443_c0_g2_m.24728	Cluster-2961.174383		TRINITY_DN95718_c2_g1_m.29516	Q9M6E6		TRINITY_DN95459_c0_g1_m.29179	Q6Z8U4		TRINITY_DN90339_c0_g2_m.23804	CSA009444.1
TRINITY_DN91467_c1_g1_m.24747	Cluster-2961.224551		TRINITY_DN95820_c0_g1_m.29646	Q9TNL9		TRINITY_DN95475_c0_g1_m.29199	Q0E2Q7		TRINITY_DN90362_c0_g1_m.23830	CSA008044.1
TRINITY_DN91487_c0_g1_m.24772	Cluster-2961.138751		TRINITY_DN95874_c4_g2_m.29712	A0A075QPA9		TRINITY_DN95481_c0_g1_m.29205	Q6YZE2		TRINITY_DN90397_c0_g1_m.23857	CSA031867.1
TRINITY_DN91518_c0_g1_m.24800	Cluster-2961.152844		TRINITY_DN95886_c0_g1_m.29729	Q6RUN3		TRINITY_DN95482_c0_g1_m.29206	Q5Z790		TRINITY_DN90456_c0_g1_m.23902	CSA033982.1
TRINITY_DN91569_c0_g1_m.24849	Cluster-2961.131304		TRINITY_DN95897_c0_g1_m.29749	Q40475		TRINITY_DN95495_c2_g1_m.29219	Q5Z8V3		TRINITY_DN90465_c0_g1_m.23912	CSA030792.1
TRINITY_DN91578_c0_g1_m.24860	Cluster-2961.155563		TRINITY_DN95994_c0_g1_m.29899	P45733		TRINITY_DN95507_c1_g1_m.29232	Q6ZCV7		TRINITY_DN90471_c0_g1_m.23922	CSA002602.1
TRINITY_DN91578_c1_g1_m.24862	Cluster-2961.155563		TRINITY_DN96023_c0_g1_m.29948	A0A024AX02		TRINITY_DN95586_c1_g1_m.29350	Q0DLC5		TRINITY_DN90476_c0_g1_m.23924	CSA001820.1
TRINITY_DN91583_c0_g1_m.24867	Cluster-2961.155563		TRINITY_DN96051_c0_g1_m.29985	A0A068JFR6		TRINITY_DN95586_c2_g1_m.29351	Q6Z4E4		TRINITY_DN90539_c0_g1_m.23963	CSA022564.1
TRINITY_DN91672_c0_g2_m.24937	Cluster-2961.145294		TRINITY_DN96106_c0_g1_m.30040	A0A097BTV9		TRINITY_DN95618_c0_g1_m.29394	Q8LRH2		TRINITY_DN90546_c1_g1_m.23968	CSA032813.1
TRINITY_DN91677_c1_g1_m.24945	Cluster-2961.224551		TRINITY_DN96113_c0_g1_m.30053	A0A097BTX5		TRINITY_DN95632_c0_g1_m.29413	Q69T99		TRINITY_DN90613_c0_g1_m.24005	CSA014748.1
TRINITY_DN91703_c1_g1_m.24965	Cluster-2961.143655		TRINITY_DN96142_c2_g1_m.30101	O82077		TRINITY_DN95633_c0_g1_m.29414	Q6Z1J6		TRINITY_DN90642_c0_g1_m.24036	CSA015978.1
TRINITY_DN91723_c0_g1_m.24978	Cluster-2961.151964		TRINITY_DN96203_c0_g1_m.30200	Q9T2L7		TRINITY_DN95649_c5_g5_m.29433	Q6ZIT9		TRINITY_DN90682_c0_g1_m.24073	CSA025432.1
TRINITY_DN91759_c0_g3_m.25000	Cluster-2961.117482		TRINITY_DN96225_c0_g2_m.30239	Q42953		TRINITY_DN95663_c1_g1_m.29446	Q0DKF0		TRINITY_DN90685_c0_g1_m.24077	CSA020590.1
TRINITY_DN91809_c0_g1_m.25046	Cluster-2961.122476		TRINITY_DN96239_c1_g1_m.30258	A8J6V0		TRINITY_DN95671_c6_g1_m.29456	C7IXC8		TRINITY_DN90704_c0_g1_m.24090	CSA021623.1
TRINITY_DN91833_c0_g1_m.25063	Cluster-2961.156152		TRINITY_DN96254_c0_g2_m.30286	Q40593		TRINITY_DN95780_c0_g2_m.29596	Q0J692		TRINITY_DN90721_c0_g1_m.24107	CSA005470.1
TRINITY_DN91835_c0_g1_m.25065	Cluster-2961.183988		TRINITY_DN96265_c0_g1_m.30304	O24141		TRINITY_DN95820_c0_g1_m.29646	Q69SV0		TRINITY_DN90760_c1_g1_m.24134	CSA023546.1
TRINITY_DN91852_c0_g1_m.25081	Cluster-2961.57182		TRINITY_DN96287_c0_g1_m.30344	F2VJ75		TRINITY_DN95827_c0_g1_m.29657	Q6H852		TRINITY_DN90769_c0_g1_m.24141	CSA036241.1
TRINITY_DN91916_c0_g1_m.25148	Cluster-2961.158035		TRINITY_DN96293_c0_g1_m.30347	Q94IQ1		TRINITY_DN95878_c5_g2_m.29719	Q84VC7		TRINITY_DN90837_c0_g1_m.24207	CSA032584.1
TRINITY_DN91975_c0_g1_m.25203	Cluster-2961.77113		TRINITY_DN96319_c0_g1_m.30377	A7WPL0		TRINITY_DN95886_c0_g1_m.29729	Q6H748		TRINITY_DN90848_c0_g1_m.24218	CSA011479.1
TRINITY_DN92006_c0_g1_m.25220	Cluster-2961.187851		TRINITY_DN96337_c0_g1_m.30405	O04692		TRINITY_DN95962_c0_g1_m.29847	Q69UU3		TRINITY_DN90967_c0_g1_m.24323	CSA002335.1
TRINITY_DN92044_c0_g1_m.25258	Cluster-2961.84264		TRINITY_DN96346_c5_g8_m.30421	O65852		TRINITY_DN95980_c0_g1_m.29875	Q2QX01		TRINITY_DN90996_c0_g2_m.24338	CSA021639.1
TRINITY_DN92056_c0_g1_m.25270	Cluster-2961.65230		TRINITY_DN96387_c0_g1_m.30470	A0A077DCL2		TRINITY_DN95994_c0_g1_m.29899	Q0DZE3		TRINITY_DN91078_c0_g1_m.24395	CSA033802.1
TRINITY_DN92090_c0_g1_m.25309	Cluster-2961.124071		TRINITY_DN96393_c0_g2_m.30479	O04361		TRINITY_DN96051_c0_g1_m.29985	Q69K00		TRINITY_DN91098_c0_g1_m.24420	CSA002361.1
TRINITY_DN92099_c0_g1_m.25317	Cluster-2961.143655		TRINITY_DN96401_c2_g1_m.30490	P93344		TRINITY_DN96106_c0_g1_m.30040	Q651T8		TRINITY_DN91227_c0_g1_m.24517	CSA017238.1
TRINITY_DN92120_c0_g1_m.25332	Cluster-2961.181098		TRINITY_DN96413_c0_g1_m.30512	Q40471		TRINITY_DN96113_c0_g1_m.30053	Q6K9N6		TRINITY_DN91264_c0_g1_m.24566	CSA014052.1
TRINITY_DN92162_c0_g1_m.25376	Cluster-2961.176839		TRINITY_DN96438_c0_g1_m.30539	B6V765		TRINITY_DN96146_c1_g1_m.30106	Q7EY18		TRINITY_DN91288_c0_g1_m.24589	CSA002213.1
TRINITY_DN92204_c0_g2_m.25413	Cluster-2961.156656		TRINITY_DN96491_c0_g1_m.30622	Q9SMB6		TRINITY_DN96151_c0_g1_m.30119	Q0IWL9		TRINITY_DN91364_c1_g1_m.24671	CSA011668.1
TRINITY_DN92219_c0_g1_m.25433	Cluster-2961.72464		TRINITY_DN96494_c0_g1_m.30626	Q5D4P8		TRINITY_DN96203_c0_g1_m.30200	Q6H443		TRINITY_DN91368_c0_g1_m.24675	CSA034464.1
TRINITY_DN92233_c0_g1_m.25449	Cluster-2961.147951		TRINITY_DN96496_c1_g2_m.30631	A0A075F2H0		TRINITY_DN96225_c0_g2_m.30239	Q2R8Z5		TRINITY_DN91375_c0_g1_m.24685	CSA007565.1
TRINITY_DN92285_c1_g3_m.25491	Cluster-2961.153199		TRINITY_DN96498_c0_g1_m.30632	Q93X34		TRINITY_DN96228_c0_g1_m.30249	Q2QS11		TRINITY_DN91436_c0_g1_m.24722	CSA032695.1
TRINITY_DN92302_c0_g1_m.25516	Cluster-2961.126689		TRINITY_DN96519_c0_g1_m.30665	Q9AT17		TRINITY_DN96242_c0_g1_m.30262	Q60E58		TRINITY_DN91443_c0_g2_m.24728	CSA001605.1
TRINITY_DN92302_c0_g2_m.25518	Cluster-2961.126689		TRINITY_DN96526_c6_g3_m.30683	A0A068JFR3		TRINITY_DN96254_c0_g2_m.30286	Q0JEM8		TRINITY_DN91467_c1_g1_m.24747	CSA031868.1
TRINITY_DN92358_c0_g1_m.25565	Cluster-2961.151877		TRINITY_DN96615_c1_g1_m.30811	Q9XIV9		TRINITY_DN96293_c0_g1_m.30347	Q5JMS4		TRINITY_DN91480_c0_g1_m.24763	CSA008530.1
TRINITY_DN92383_c0_g1_m.25588	Cluster-2961.202872		TRINITY_DN96669_c1_g1_m.30885	A0A076KWG9		TRINITY_DN96337_c0_g1_m.30405	Q5Z7N3		TRINITY_DN91487_c0_g1_m.24772	CSA035465.1
TRINITY_DN92402_c0_g1_m.25608	Cluster-2961.269050		TRINITY_DN96724_c0_g1_m.30959	Q9FVE9		TRINITY_DN96355_c0_g1_m.30430	Q0J878		TRINITY_DN91518_c0_g1_m.24800	CSA032664.1
TRINITY_DN92404_c0_g2_m.25610	Cluster-2961.143655		TRINITY_DN96743_c10_g1_m.30998	Q40463		TRINITY_DN96393_c0_g2_m.30479	Q6AVQ4		TRINITY_DN91569_c0_g1_m.24849	CSA035044.1
TRINITY_DN92421_c0_g1_m.25631	Cluster-2961.148551		TRINITY_DN96841_c0_g1_m.31142	Q40567		TRINITY_DN96411_c0_g1_m.30511	Q75IA5		TRINITY_DN91578_c0_g1_m.24860	CSA029877.1
TRINITY_DN92461_c0_g1_m.25670	Cluster-2961.64764		TRINITY_DN96884_c0_g1_m.31191	A0A068JIB0		TRINITY_DN96424_c0_g1_m.30528	Q10LF8		TRINITY_DN91578_c1_g1_m.24862	CSA029877.1
TRINITY_DN92497_c1_g1_m.25710	Cluster-2961.147637		TRINITY_DN96963_c0_g1_m.31284	Q6QND3		TRINITY_DN96491_c0_g1_m.30622	Q5JJJ5		TRINITY_DN91647_c1_g1_m.24911	CSA035369.1
TRINITY_DN92499_c0_g1_m.25713	Cluster-2961.68493		TRINITY_DN96991_c0_g1_m.31332	Q6PUF9		TRINITY_DN96496_c1_g2_m.30631	Q84VC8		TRINITY_DN91677_c1_g1_m.24945	CSA031868.1
TRINITY_DN92548_c0_g1_m.25758	Cluster-2961.149819		TRINITY_DN97037_c0_g1_m.31388	Q3LAG5		TRINITY_DN96498_c0_g1_m.30632	Q0DH55		TRINITY_DN91703_c1_g1_m.24965	CSA003953.1
TRINITY_DN92551_c0_g1_m.25760	Cluster-2961.97100		TRINITY_DN97066_c1_g1_m.31437	P27154		TRINITY_DN96503_c0_g1_m.30642	Q6ZC69		TRINITY_DN91704_c0_g1_m.24967	CSA014732.1
TRINITY_DN92584_c0_g1_m.25785	Cluster-2961.176713		TRINITY_DN97239_c2_g1_m.31720	P93375		TRINITY_DN96526_c6_g3_m.30683	Q0DDD3		TRINITY_DN91716_c0_g1_m.24975	CSA005982.1
TRINITY_DN92615_c0_g2_m.25813	Cluster-2961.154022		TRINITY_DN97250_c0_g1_m.31741	A8J6V0		TRINITY_DN96606_c0_g1_m.30799	Q8LNF2		TRINITY_DN91722_c0_g1_m.24977	CSA010664.1
TRINITY_DN92615_c0_g3_m.25814	Cluster-2961.154022		TRINITY_DN97262_c0_g1_m.31761	O24141		TRINITY_DN96669_c1_g1_m.30885	Q7XRT0		TRINITY_DN91723_c0_g1_m.24978	CSA036583.1
TRINITY_DN92625_c0_g1_m.25830	Cluster-2961.216242		TRINITY_DN97332_c1_g1_m.31858	Q40520		TRINITY_DN96724_c0_g1_m.30959	Q6YZX6		TRINITY_DN91797_c0_g1_m.25035	CSA001723.1
TRINITY_DN92644_c0_g1_m.25838	Cluster-2961.152844		TRINITY_DN97347_c0_g1_m.31886	D4P3S0		TRINITY_DN96746_c0_g1_m.31010	Q10MQ2		TRINITY_DN91809_c0_g1_m.25046	CSA008457.1
TRINITY_DN92678_c1_g1_m.25861	Cluster-2961.155792		TRINITY_DN97433_c4_g4_m.32011	Q8VXD0		TRINITY_DN96759_c4_g1_m.31020	Q6ER67		TRINITY_DN91818_c0_g2_m.25054	CSA028599.1
TRINITY_DN92685_c0_g1_m.25868	Cluster-2961.150469		TRINITY_DN97459_c0_g1_m.32055	A9XG41		TRINITY_DN96832_c0_g2_m.31128	Q6ZHZ1		TRINITY_DN91844_c6_g2_m.25075	CSA002530.1
TRINITY_DN92694_c0_g1_m.25877	Cluster-2961.164690		TRINITY_DN97563_c0_g1_m.32213	E0CJP3		TRINITY_DN96852_c0_g1_m.31155	Q2QWT4		TRINITY_DN91975_c0_g1_m.25203	CSA017084.1
TRINITY_DN92720_c0_g1_m.25905	Cluster-2961.106191		TRINITY_DN97585_c0_g1_m.32246	A9CM21		TRINITY_DN96873_c0_g1_m.31179	Q6ATY4		TRINITY_DN91989_c0_g1_m.25210	CSA005888.1
TRINITY_DN92782_c0_g1_m.25965	Cluster-2961.179629		TRINITY_DN97646_c1_g1_m.32332	A0A077DBL4		TRINITY_DN96884_c0_g1_m.31191	P17784		TRINITY_DN92006_c0_g1_m.25220	CSA030406.1
TRINITY_DN92812_c0_g2_m.25989	Cluster-2961.157004		TRINITY_DN97723_c3_g1_m.32443	O24511		TRINITY_DN96963_c0_g1_m.31284	Q69LA6		TRINITY_DN92021_c0_g1_m.25233	CSA026219.1
TRINITY_DN92886_c0_g1_m.26068	Cluster-2961.106191		TRINITY_DN97757_c0_g1_m.32505	Q40493		TRINITY_DN97037_c0_g1_m.31388	Q9XEA6		TRINITY_DN92060_c0_g1_m.25274	CSA029498.1
TRINITY_DN92920_c0_g1_m.26114	Cluster-2961.124274		TRINITY_DN97789_c2_g1_m.32547	Q9FVE9		TRINITY_DN97057_c0_g1_m.31419	Q7XUW0		TRINITY_DN92064_c2_g1_m.25276	CSA000579.1
TRINITY_DN92935_c1_g1_m.26127	Cluster-2961.156656		TRINITY_DN97804_c0_g11_m.32567	A0A076FU21		TRINITY_DN97074_c1_g1_m.31449	Q9AS76		TRINITY_DN92074_c0_g2_m.25288	CSA005379.1
TRINITY_DN92964_c0_g1_m.26151	Cluster-3866.1		TRINITY_DN97804_c0_g7_m.32570	A0A076FU21		TRINITY_DN97154_c0_g1_m.31582	Q84T92		TRINITY_DN92082_c0_g1_m.25300	CSA029482.1
TRINITY_DN93015_c0_g1_m.26197	Cluster-2961.148606		TRINITY_DN97804_c0_g9_m.32572	A0A076FU21		TRINITY_DN97262_c0_g1_m.31761	Q6K439		TRINITY_DN92090_c0_g1_m.25309	CSA026896.1
TRINITY_DN93020_c0_g1_m.26205	Cluster-2961.141635		TRINITY_DN97813_c0_g1_m.32590	Q04065		TRINITY_DN97282_c0_g1_m.31786	Q7F190		TRINITY_DN92099_c0_g1_m.25317	CSA002456.1
TRINITY_DN93053_c0_g2_m.26233	Cluster-2961.154688		TRINITY_DN97819_c0_g2_m.32596	Q40493		TRINITY_DN97288_c0_g1_m.31794	Q8L4L4		TRINITY_DN92120_c0_g1_m.25332	CSA033261.1
TRINITY_DN93054_c1_g1_m.26234	Cluster-2961.138384		TRINITY_DN97843_c0_g1_m.32632	Q75U98		TRINITY_DN97289_c0_g1_m.31796	Q7XC34		TRINITY_DN92162_c0_g1_m.25376	CSA034816.1
TRINITY_DN93061_c0_g1_m.26239	Cluster-2961.167191		TRINITY_DN97892_c0_g1_m.32711	Q9FSF2		TRINITY_DN97366_c0_g1_m.31909	Q651B1		TRINITY_DN92204_c0_g2_m.25413	CSA022847.1
TRINITY_DN93133_c3_g1_m.26310	Cluster-2961.146395		TRINITY_DN97922_c1_g1_m.32767	P29345		TRINITY_DN97400_c1_g1_m.31973	Q9AYP4		TRINITY_DN92224_c0_g1_m.25434	CSA002844.1
TRINITY_DN93236_c1_g1_m.26407	Cluster-2961.164706		TRINITY_DN97928_c0_g1_m.32775	Q42955		TRINITY_DN97425_c0_g1_m.31997	Q9SXP2		TRINITY_DN92233_c0_g1_m.25449	CSA035408.1
TRINITY_DN93312_c0_g1_m.26501	Cluster-2961.147891		TRINITY_DN98000_c1_g1_m.32899	A0A097BU06		TRINITY_DN97433_c4_g4_m.32011	Q0PVB0		TRINITY_DN92242_c1_g1_m.25455	CSA012532.1
TRINITY_DN93354_c0_g1_m.26546	Cluster-2961.153775		TRINITY_DN98013_c0_g1_m.32917	Q8LSZ3		TRINITY_DN97480_c0_g2_m.32092	Q7XN10		TRINITY_DN92256_c0_g1_m.25468	CSA025110.1
TRINITY_DN93401_c0_g1_m.26593	Cluster-2961.165779		TRINITY_DN98020_c0_g1_m.32928	Q43800		TRINITY_DN97646_c1_g1_m.32332	Q7XV86		TRINITY_DN92285_c1_g3_m.25491	CSA026349.1
TRINITY_DN93424_c0_g1_m.26625	Cluster-2961.219362		TRINITY_DN98032_c0_g2_m.32943	Q0PWS6		TRINITY_DN97668_c1_g1_m.32359	Q6ZFI6		TRINITY_DN92294_c0_g1_m.25504	CSA004669.1
TRINITY_DN93435_c0_g2_m.26640	Cluster-2961.131304		TRINITY_DN98057_c1_g1_m.32975	K0I7G7		TRINITY_DN97723_c3_g1_m.32443	Q10S82		TRINITY_DN92295_c0_g2_m.25506	CSA027186.1
TRINITY_DN93515_c0_g1_m.26724	Cluster-2961.158213		TRINITY_DN98076_c0_g2_m.33010	A0A076FU26		TRINITY_DN97745_c0_g1_m.32480	Q0ISV6		TRINITY_DN92383_c0_g1_m.25588	CSA021126.1
TRINITY_DN93591_c0_g1_m.26830	Cluster-2961.219362		TRINITY_DN98164_c0_g1_m.33135	P68158		TRINITY_DN97789_c2_g1_m.32547	Q10S34		TRINITY_DN92397_c0_g1_m.25603	CSA017237.1
TRINITY_DN93605_c0_g1_m.26848	Cluster-2961.178135		TRINITY_DN98211_c0_g6_m.33200	Q9FXS3		TRINITY_DN97813_c0_g1_m.32590	Q6ZD89		TRINITY_DN92497_c1_g1_m.25710	CSA034182.1
TRINITY_DN93616_c0_g1_m.26863	Cluster-2961.145294		TRINITY_DN98303_c3_g1_m.33397	Q7M275		TRINITY_DN97819_c0_g2_m.32596	Q75M32		TRINITY_DN92499_c0_g1_m.25713	CSA026073.1
TRINITY_DN93663_c0_g1_m.26917	Cluster-2961.155563		TRINITY_DN98358_c0_g1_m.33487	U3RJ91		TRINITY_DN97853_c1_g1_m.32652	Q84M68		TRINITY_DN92520_c0_g1_m.25730	CSA011544.1
TRINITY_DN93690_c0_g1_m.26952	Cluster-2961.124311		TRINITY_DN98473_c0_g2_m.33674	P36182		TRINITY_DN97862_c2_g1_m.32668	Q6K850		TRINITY_DN92536_c0_g1_m.25743	CSA004654.1
TRINITY_DN93718_c0_g1_m.26993	Cluster-2961.146487		TRINITY_DN98523_c1_g3_m.33732	A0A0D3QSL6		TRINITY_DN97894_c0_g1_m.32714	Q8LHQ6		TRINITY_DN92536_c1_g1_m.25744	CSA004654.1
TRINITY_DN93718_c0_g1_m.26994	Cluster-2961.146487		TRINITY_DN98545_c0_g1_m.33770	E0CJP3		TRINITY_DN97922_c1_g1_m.32767	Q75LR5		TRINITY_DN92536_c1_g2_m.25745	CSA004654.1
TRINITY_DN93720_c1_g1_m.26996	Cluster-2961.148675		TRINITY_DN98558_c0_g1_m.33798	Q8LNZ4		TRINITY_DN98002_c0_g2_m.32904	Q7XI43		TRINITY_DN92546_c0_g1_m.25754	CSA000107.1
TRINITY_DN93722_c0_g1_m.26997	Cluster-2961.196435		TRINITY_DN98576_c1_g1_m.33819	A0A0A8WH05		TRINITY_DN98013_c0_g1_m.32917	Q8W3D9		TRINITY_DN92548_c0_g1_m.25758	CSA031787.1
TRINITY_DN93776_c0_g1_m.27066	Cluster-2961.162960		TRINITY_DN98718_c0_g1_m.34036	Q9XEN8		TRINITY_DN98032_c0_g2_m.32943	Q7XV11		TRINITY_DN92551_c0_g1_m.25760	CSA013419.1
TRINITY_DN93813_c0_g1_m.27115	Cluster-2961.161012		TRINITY_DN98876_c1_g1_m.34294	Q9XQP4		TRINITY_DN98057_c1_g1_m.32975	Q6ER94		TRINITY_DN92553_c0_g1_m.25763	CSA013580.1
TRINITY_DN93867_c0_g1_m.27171	Cluster-2961.148551		TRINITY_DN98929_c0_g1_m.34378	A0A076FNJ9		TRINITY_DN98089_c1_g3_m.33031	Q6YW78		TRINITY_DN92569_c0_g1_m.25774	CSA028843.1
TRINITY_DN93958_c4_g1_m.27270	Cluster-2961.150114		TRINITY_DN99001_c0_g1_m.34516	A9YTW4		TRINITY_DN98107_c0_g1_m.33063	Q5NBJ3		TRINITY_DN92571_c1_g1_m.25778	CSA014732.1
TRINITY_DN93972_c0_g1_m.27285	Cluster-2961.163000		TRINITY_DN99009_c0_g1_m.34525	W8SVJ4		TRINITY_DN98108_c0_g1_m.33064	Q0DF89		TRINITY_DN92584_c0_g1_m.25785	CSA006268.1
TRINITY_DN93986_c0_g1_m.27300	Cluster-2961.147894		TRINITY_DN99063_c1_g1_m.34602	Q852S5		TRINITY_DN98164_c0_g1_m.33135	Q6ZI53		TRINITY_DN92586_c0_g1_m.25788	CSA010838.1
TRINITY_DN94008_c0_g1_m.27326	Cluster-2961.83174		TRINITY_DN99066_c0_g1_m.34606	Q40589		TRINITY_DN98189_c4_g7_m.33165	Q6K8D9		TRINITY_DN92615_c0_g2_m.25813	CSA028455.1
TRINITY_DN94046_c0_g1_m.27370	Cluster-2961.155857		TRINITY_DN99096_c0_g1_m.34648	Q42962		TRINITY_DN98211_c0_g6_m.33200	Q6ESJ0		TRINITY_DN92615_c0_g3_m.25814	CSA028455.1
TRINITY_DN94204_c0_g1_m.27551	Cluster-2961.161684		TRINITY_DN99100_c0_g1_m.34657	A0A139ZSG9		TRINITY_DN98228_c0_g1_m.33236	Q75IM9		TRINITY_DN92625_c0_g1_m.25830	CSA033083.1
TRINITY_DN94238_c0_g1_m.27588	Cluster-2961.147652		TRINITY_DN99117_c0_g1_m.34685	Q40554		TRINITY_DN98242_c1_g1_m.33261	Q69MU0		TRINITY_DN92644_c0_g1_m.25838	CSA032664.1
TRINITY_DN94270_c0_g1_m.27619	Cluster-2961.205666		TRINITY_DN99201_c0_g1_m.34828	A9CM22		TRINITY_DN98282_c0_g1_m.33347	Q6H660		TRINITY_DN92664_c0_g1_m.25852	CSA011382.1
TRINITY_DN94272_c0_g1_m.27621	Cluster-2961.162920		TRINITY_DN99214_c1_g1_m.34851	D4P3S0		TRINITY_DN98352_c0_g1_m.33477	Q6ATB2		TRINITY_DN92685_c0_g1_m.25868	CSA024064.1
TRINITY_DN94276_c0_g2_m.27625	Cluster-2961.153199		TRINITY_DN99283_c0_g1_m.34976	A0A0N7CV06		TRINITY_DN98386_c0_g1_m.33539	Q7F9I1		TRINITY_DN92694_c0_g1_m.25877	CSA000547.1
TRINITY_DN94281_c0_g1_m.27627	Cluster-2961.147525		TRINITY_DN99292_c0_g1_m.34995	P93400		TRINITY_DN98401_c1_g1_m.33568	Q5N9Z8		TRINITY_DN92720_c0_g1_m.25905	CSA003697.1
TRINITY_DN94362_c0_g1_m.27735	Cluster-2961.147894		TRINITY_DN99340_c0_g1_m.35080	Q9SMB6		TRINITY_DN98402_c0_g1_m.33569	Q6H547		TRINITY_DN92746_c0_g1_m.25927	CSA019241.1
TRINITY_DN94449_c2_g1_m.27862	Cluster-2961.36161		TRINITY_DN99359_c1_g2_m.35121	A0A076KXA0		TRINITY_DN98557_c0_g1_m.33797	Q7XLG4		TRINITY_DN92768_c0_g1_m.25954	CSA036135.1
TRINITY_DN94453_c1_g2_m.27864	Cluster-2961.148138		TRINITY_DN99397_c1_g2_m.35183	A0A9R6		TRINITY_DN98576_c1_g1_m.33819	Q6K215		TRINITY_DN92782_c0_g1_m.25965	CSA025224.1
TRINITY_DN94475_c0_g1_m.27888	Cluster-2961.97100		TRINITY_DN99479_c0_g1_m.35288	Q9FEV9		TRINITY_DN98577_c3_g1_m.33821	Q10MT2		TRINITY_DN92812_c0_g2_m.25989	CSA010862.1
TRINITY_DN94529_c0_g1_m.27959	Cluster-2961.148883		TRINITY_DN99516_c1_g1_m.35350	Q14TB1		TRINITY_DN98592_c1_g2_m.33846	Q0JLN9		TRINITY_DN92839_c0_g1_m.26017	CSA000660.1
TRINITY_DN94577_c0_g1_m.27995	Cluster-2961.137678		TRINITY_DN99526_c1_g1_m.35368	P09044		TRINITY_DN98681_c0_g1_m.33978	Q84P96		TRINITY_DN92849_c0_g1_m.26028	CSA012375.1
TRINITY_DN94593_c2_g2_m.28017	Cluster-2961.83174		TRINITY_DN99566_c0_g1_m.35422	Q8W3Z6		TRINITY_DN98713_c0_g2_m.34024	Q6YY64		TRINITY_DN92861_c0_g2_m.26039	CSA016826.1
TRINITY_DN94632_c0_g1_m.28069	Cluster-2961.151548		TRINITY_DN99583_c0_g1_m.35454	Q8W402		TRINITY_DN98718_c0_g1_m.34036	Q0DIK2		TRINITY_DN92886_c0_g1_m.26068	CSA003697.1
TRINITY_DN94636_c0_g1_m.28074	Cluster-2961.148213		TRINITY_DN99618_c1_g1_m.35517	P35477		TRINITY_DN98799_c0_g1_m.34171	Q5JKQ2		TRINITY_DN92894_c2_g1_m.26078	CSA025110.1
TRINITY_DN94637_c0_g1_m.28076	Cluster-2961.183988		TRINITY_DN99633_c2_g5_m.35546	Q40493		TRINITY_DN98912_c0_g1_m.34347	Q7XQQ7		TRINITY_DN92907_c0_g1_m.26099	CSA032333.1
TRINITY_DN94639_c0_g2_m.28077	Cluster-2961.102995		TRINITY_DN99642_c0_g1_m.35567	Q9ZSP3		TRINITY_DN99003_c1_g1_m.34518	Q69UF2		TRINITY_DN92920_c0_g1_m.26114	CSA011221.1
TRINITY_DN94662_c0_g1_m.28114	Cluster-2961.145294		TRINITY_DN99648_c0_g1_m.35579	H9CCI1		TRINITY_DN99012_c0_g1_m.34527	Q6ZCC2		TRINITY_DN92935_c1_g1_m.26127	CSA022823.1
TRINITY_DN94738_c0_g1_m.28192	Cluster-2961.69979		TRINITY_DN99674_c0_g1_m.35626	Q67BD0		TRINITY_DN99063_c1_g1_m.34602	Q0IMS5		TRINITY_DN92964_c0_g1_m.26151	CSA033259.1
TRINITY_DN94774_c1_g1_m.28226	Cluster-2961.175989		TRINITY_DN99674_c1_g3_m.35628	I7GVS5		TRINITY_DN99066_c0_g1_m.34606	Q6ZJJ1		TRINITY_DN93015_c0_g1_m.26197	CSA028552.1
TRINITY_DN94790_c0_g1_m.28249	Cluster-2961.136371		TRINITY_DN99674_c2_g1_m.35629	I7GVS5		TRINITY_DN99087_c5_g1_m.34634	Q6K2Y3		TRINITY_DN93026_c1_g1_m.26210	CSA028031.1
TRINITY_DN94800_c0_g1_m.28264	Cluster-2961.290597		TRINITY_DN99699_c0_g1_m.35664	A0A077DCK9		TRINITY_DN99096_c0_g1_m.34648	Q65X66		TRINITY_DN93054_c1_g1_m.26234	CSA021191.1
TRINITY_DN94807_c0_g1_m.28268	Cluster-2961.165939		TRINITY_DN99755_c0_g1_m.35750	A0A075F1V0		TRINITY_DN99100_c0_g1_m.34657	Q9LI00		TRINITY_DN93061_c0_g1_m.26239	CSA003663.1
TRINITY_DN94807_c0_g2_m.28273	Cluster-2961.165939		TRINITY_DN99793_c2_g1_m.35818	Q03685		TRINITY_DN99103_c0_g1_m.34662	Q6L4S3		TRINITY_DN93189_c1_g1_m.26362	CSA033693.1
TRINITY_DN94818_c0_g8_m.28285	Cluster-2961.187853		TRINITY_DN99844_c0_g1_m.35916	P68158		TRINITY_DN99117_c0_g1_m.34685	Q5ZEN1		TRINITY_DN93236_c1_g1_m.26407	CSA029743.1
TRINITY_DN94819_c0_g1_m.28287	Cluster-2961.151447		TRINITY_DN99905_c0_g1_m.36022	A7U629		TRINITY_DN99201_c0_g1_m.34828	Q84P97		TRINITY_DN93312_c0_g1_m.26501	CSA029484.1
TRINITY_DN94820_c0_g1_m.28290	Cluster-2961.282875		TRINITY_DN99936_c1_g1_m.36071	Q9T2L7		TRINITY_DN99292_c0_g1_m.34995	Q43007		TRINITY_DN93354_c0_g1_m.26546	CSA007137.1
TRINITY_DN94846_c3_g1_m.28316	Cluster-2961.179280		TRINITY_DN99942_c1_g2_m.36084	Q5IH14		TRINITY_DN99315_c1_g1_m.35034	Q75G86		TRINITY_DN93424_c0_g1_m.26625	CSA025321.1
TRINITY_DN94868_c0_g1_m.28339	Cluster-2961.65376					TRINITY_DN99359_c1_g2_m.35121	Q5Z6P9		TRINITY_DN93435_c0_g2_m.26640	CSA022649.1
TRINITY_DN94951_c0_g1_m.28431	Cluster-2961.184360					TRINITY_DN99505_c0_g1_m.35334	Q8W317		TRINITY_DN93515_c0_g1_m.26724	CSA002026.1
TRINITY_DN94972_c1_g2_m.28453	Cluster-2961.224551					TRINITY_DN99516_c1_g1_m.35350	Q69QQ6		TRINITY_DN93591_c0_g1_m.26830	CSA036155.1
TRINITY_DN94990_c0_g1_m.28480	Cluster-2961.112668					TRINITY_DN99526_c1_g1_m.35368	Q9SNK3		TRINITY_DN93605_c0_g1_m.26848	CSA012291.1
TRINITY_DN95013_c0_g1_m.28505	Cluster-2961.107907					TRINITY_DN99573_c0_g2_m.35432	Q8H903		TRINITY_DN93616_c0_g1_m.26863	CSA034432.1
TRINITY_DN95043_c2_g1_m.28543	Cluster-2961.158814					TRINITY_DN99597_c1_g1_m.35472	Q7XXP7		TRINITY_DN93690_c0_g1_m.26952	CSA030060.1
TRINITY_DN95079_c0_g1_m.28595	Cluster-2961.97100					TRINITY_DN99600_c0_g1_m.35483	Q0DV32		TRINITY_DN93718_c0_g1_m.26993	CSA013895.1
TRINITY_DN95110_c2_g1_m.28645	Cluster-2961.142932					TRINITY_DN99603_c0_g2_m.35487	Q9ASP4		TRINITY_DN93720_c1_g1_m.26996	CSA026004.1
TRINITY_DN95125_c0_g2_m.28659	Cluster-2961.113991					TRINITY_DN99606_c0_g1_m.35495	Q94GG8		TRINITY_DN93722_c0_g1_m.26997	CSA027797.1
TRINITY_DN95130_c0_g3_m.28664	Cluster-2961.229525					TRINITY_DN99650_c0_g1_m.35583	Q84S20		TRINITY_DN93776_c0_g1_m.27066	CSA009375.1
TRINITY_DN95140_c0_g1_m.28676	Cluster-2961.156656					TRINITY_DN99674_c1_g3_m.35628	Q943K7		TRINITY_DN93867_c0_g1_m.27171	CSA018098.1
TRINITY_DN95157_c0_g1_m.28698	Cluster-2961.161908					TRINITY_DN99699_c0_g1_m.35664	Q7F2G3		TRINITY_DN93893_c3_g1_m.27195	CSA017726.1
TRINITY_DN95223_c0_g1_m.28801	Cluster-2961.155857					TRINITY_DN99710_c0_g1_m.35681	Q8H852		TRINITY_DN93918_c0_g1_m.27224	CSA013580.1
TRINITY_DN95225_c0_g1_m.28805	Cluster-2961.145793					TRINITY_DN99755_c0_g1_m.35750	Q94JA2		TRINITY_DN93972_c0_g1_m.27285	CSA021619.1
TRINITY_DN95226_c0_g2_m.28807	Cluster-2961.147405					TRINITY_DN99793_c2_g1_m.35818	Q6Z7B0		TRINITY_DN93980_c0_g1_m.27294	CSA009895.1
TRINITY_DN95292_c0_g2_m.28911	Cluster-2961.145793					TRINITY_DN99808_c1_g1_m.35853	Q8S0J7		TRINITY_DN93986_c0_g1_m.27300	CSA028194.1
TRINITY_DN95347_c0_g1_m.28988	Cluster-2961.140279					TRINITY_DN99916_c9_g2_m.36042	Q9ZTP5		TRINITY_DN93988_c2_g1_m.27309	CSA015506.1
TRINITY_DN95351_c0_g1_m.28994	Cluster-2961.127561					TRINITY_DN99932_c1_g1_m.36066	Q0JM76		TRINITY_DN94046_c0_g1_m.27370	CSA010369.1
TRINITY_DN95358_c0_g1_m.29001	Cluster-2961.131304					TRINITY_DN99942_c1_g2_m.36084	Q6YXW6		TRINITY_DN94078_c0_g1_m.27410	CSA015552.1
TRINITY_DN95392_c0_g1_m.29058	Cluster-2961.150489								TRINITY_DN94137_c3_g1_m.27475	CSA003336.1
TRINITY_DN95396_c0_g1_m.29065	Cluster-2961.15249								TRINITY_DN94182_c2_g1_m.27513	CSA013374.1
TRINITY_DN95396_c1_g1_m.29067	Cluster-2961.15249								TRINITY_DN94238_c0_g1_m.27588	CSA035910.1
TRINITY_DN95408_c3_g1_m.29086	Cluster-2961.152844								TRINITY_DN94270_c0_g1_m.27619	CSA034656.1
TRINITY_DN95446_c0_g1_m.29156	Cluster-2961.148551								TRINITY_DN94272_c0_g1_m.27621	CSA016983.1
TRINITY_DN95456_c0_g1_m.29175	Cluster-2961.148155								TRINITY_DN94276_c0_g2_m.27625	CSA026349.1
TRINITY_DN95457_c0_g1_m.29177	Cluster-2961.175664								TRINITY_DN94362_c0_g1_m.27735	CSA036455.1
TRINITY_DN95475_c0_g1_m.29199	Cluster-2961.141301								TRINITY_DN94449_c2_g1_m.27862	CSA012836.1
TRINITY_DN95481_c0_g1_m.29205	Cluster-2961.88171								TRINITY_DN94453_c1_g2_m.27864	CSA031519.1
TRINITY_DN95507_c1_g1_m.29232	Cluster-2961.137417								TRINITY_DN94470_c0_g1_m.27881	CSA030673.1
TRINITY_DN95525_c0_g1_m.29253	Cluster-2961.156588								TRINITY_DN94475_c0_g1_m.27888	CSA026780.1
TRINITY_DN95569_c0_g1_m.29322	Cluster-2961.155635								TRINITY_DN94529_c0_g1_m.27959	CSA034381.1
TRINITY_DN95573_c0_g1_m.29325	Cluster-2961.278195								TRINITY_DN94577_c0_g1_m.27995	CSA022952.1
TRINITY_DN95586_c2_g1_m.29351	Cluster-2961.124356								TRINITY_DN94595_c0_g1_m.28019	CSA009317.1
TRINITY_DN95593_c0_g1_m.29362	Cluster-2961.167563								TRINITY_DN94636_c0_g1_m.28074	CSA010617.1
TRINITY_DN95601_c0_g1_m.29369	Cluster-2961.130094								TRINITY_DN94639_c0_g2_m.28077	CSA018973.1
TRINITY_DN95632_c0_g1_m.29413	Cluster-2961.124318								TRINITY_DN94662_c0_g1_m.28114	CSA021835.1
TRINITY_DN95633_c0_g1_m.29414	Cluster-2961.165698								TRINITY_DN94774_c1_g1_m.28226	CSA029342.1
TRINITY_DN95649_c5_g5_m.29433	Cluster-2961.115629								TRINITY_DN94790_c0_g1_m.28249	CSA002837.1
TRINITY_DN95650_c0_g1_m.29434	Cluster-2961.156656								TRINITY_DN94800_c0_g1_m.28264	CSA028001.1
TRINITY_DN95671_c6_g1_m.29456	Cluster-2961.202525								TRINITY_DN94807_c0_g1_m.28268	CSA021791.1
TRINITY_DN95671_c6_g1_m.29458	Cluster-2961.202525								TRINITY_DN94807_c0_g2_m.28273	CSA017546.1
TRINITY_DN95774_c0_g1_m.29589	Cluster-2961.133519								TRINITY_DN94812_c0_g1_m.28275	CSA028806.1
TRINITY_DN95780_c0_g2_m.29596	Cluster-2961.65376								TRINITY_DN94818_c0_g8_m.28285	CSA033802.1
TRINITY_DN95820_c0_g1_m.29646	Cluster-2961.282875								TRINITY_DN94819_c0_g1_m.28287	CSA006550.1
TRINITY_DN95827_c0_g1_m.29657	Cluster-2961.98649								TRINITY_DN94820_c0_g1_m.28290	CSA003213.1
TRINITY_DN95870_c0_g1_m.29707	Cluster-2961.165939								TRINITY_DN94821_c9_g1_m.28292	CSA023321.1
TRINITY_DN95878_c5_g2_m.29719	Cluster-2961.128812								TRINITY_DN94868_c0_g1_m.28339	CSA005509.1
TRINITY_DN95886_c0_g1_m.29729	Cluster-2961.148124								TRINITY_DN94951_c0_g1_m.28431	CSA022412.1
TRINITY_DN95897_c0_g1_m.29749	Cluster-2961.165779								TRINITY_DN94972_c1_g2_m.28453	CSA028660.1
TRINITY_DN95962_c0_g1_m.29847	Cluster-2961.164690								TRINITY_DN94985_c0_g1_m.28471	CSA004632.1
TRINITY_DN96009_c0_g7_m.29930	Cluster-2961.188185								TRINITY_DN94990_c0_g1_m.28480	CSA007747.1
TRINITY_DN96023_c0_g1_m.29948	Cluster-2961.207734								TRINITY_DN95043_c2_g1_m.28543	CSA009025.1
TRINITY_DN96029_c0_g1_m.29955	Cluster-2961.124048								TRINITY_DN95077_c0_g2_m.28591	CSA003557.1
TRINITY_DN96034_c0_g1_m.29959	Cluster-2961.201727								TRINITY_DN95079_c0_g1_m.28595	CSA013419.1
TRINITY_DN96051_c0_g1_m.29985	Cluster-2961.144458								TRINITY_DN95087_c0_g1_m.28611	CSA000260.1
TRINITY_DN96052_c0_g1_m.29986	Cluster-2961.163635								TRINITY_DN95130_c0_g3_m.28664	CSA023469.1
TRINITY_DN96052_c0_g2_m.29987	Cluster-2961.163635								TRINITY_DN95176_c2_g2_m.28733	CSA020889.1
TRINITY_DN96106_c0_g1_m.30040	Cluster-2961.137112								TRINITY_DN95220_c1_g2_m.28799	CSA036892.1
TRINITY_DN96118_c0_g1_m.30063	Cluster-2961.124274								TRINITY_DN95223_c0_g1_m.28801	CSA034422.1
TRINITY_DN96151_c0_g1_m.30119	Cluster-2961.124071								TRINITY_DN95226_c0_g2_m.28807	CSA000795.1
TRINITY_DN96205_c1_g1_m.30205	Cluster-2961.120900								TRINITY_DN95236_c2_g1_m.28822	CSA019424.1
TRINITY_DN96228_c0_g1_m.30249	Cluster-2961.80000								TRINITY_DN95251_c0_g1_m.28842	CSA014396.1
TRINITY_DN96239_c1_g1_m.30258	Cluster-2961.174383								TRINITY_DN95272_c0_g1_m.28883	CSA015384.1
TRINITY_DN96241_c1_g1_m.30260	Cluster-2961.150548								TRINITY_DN95358_c0_g1_m.29001	CSA026777.1
TRINITY_DN96287_c0_g1_m.30344	Cluster-2961.147668								TRINITY_DN95363_c0_g1_m.29006	CSA012532.1
TRINITY_DN96293_c0_g1_m.30347	Cluster-2961.145749								TRINITY_DN95369_c0_g1_m.29026	CSA016705.1
TRINITY_DN96337_c0_g1_m.30405	Cluster-2961.150609								TRINITY_DN95396_c0_g1_m.29065	CSA008470.1
TRINITY_DN96346_c5_g8_m.30421	Cluster-2961.174422								TRINITY_DN95396_c1_g1_m.29067	CSA020315.1
TRINITY_DN96355_c0_g1_m.30430	Cluster-2961.158788								TRINITY_DN95396_c2_g1_m.29069	CSA005660.1
TRINITY_DN96393_c0_g2_m.30479	Cluster-2961.156152								TRINITY_DN95399_c0_g1_m.29072	CSA022929.1
TRINITY_DN96401_c2_g1_m.30490	Cluster-2961.145294								TRINITY_DN95408_c3_g1_m.29086	CSA020166.1
TRINITY_DN96411_c0_g1_m.30511	Cluster-2961.99283								TRINITY_DN95422_c0_g1_m.29113	CSA033791.1
TRINITY_DN96413_c0_g1_m.30512	Cluster-2961.148070								TRINITY_DN95446_c0_g1_m.29156	CSA026821.1
TRINITY_DN96438_c0_g1_m.30539	Cluster-2961.142932								TRINITY_DN95456_c0_g1_m.29175	CSA026796.1
TRINITY_DN96453_c1_g1_m.30570	Cluster-2961.117482								TRINITY_DN95457_c0_g1_m.29177	CSA030439.1
TRINITY_DN96491_c0_g1_m.30622	Cluster-2961.150114								TRINITY_DN95459_c0_g1_m.29179	CSA029884.1
TRINITY_DN96496_c1_g2_m.30631	Cluster-2961.140436								TRINITY_DN95475_c0_g1_m.29199	CSA003232.1
TRINITY_DN96498_c0_g1_m.30632	Cluster-2961.98649								TRINITY_DN95507_c1_g1_m.29232	CSA001864.1
TRINITY_DN96503_c0_g1_m.30642	Cluster-2961.264243								TRINITY_DN95525_c0_g1_m.29253	CSA018358.1
TRINITY_DN96508_c1_g1_m.30646	Cluster-2961.137733								TRINITY_DN95569_c0_g1_m.29322	CSA007666.1
TRINITY_DN96518_c1_g6_m.30664	Cluster-2961.148485								TRINITY_DN95573_c0_g1_m.29325	CSA015093.1
TRINITY_DN96602_c2_g1_m.30796	Cluster-2961.161144								TRINITY_DN95593_c0_g1_m.29362	CSA001107.1
TRINITY_DN96613_c0_g1_m.30808	Cluster-2961.154433								TRINITY_DN95618_c0_g1_m.29394	CSA024142.1
TRINITY_DN96615_c1_g1_m.30811	Cluster-2961.145749								TRINITY_DN95632_c0_g1_m.29413	CSA017776.1
TRINITY_DN96658_c0_g1_m.30872	Cluster-2961.167074								TRINITY_DN95633_c0_g1_m.29414	CSA034363.1
TRINITY_DN96669_c1_g1_m.30885	Cluster-2961.149286								TRINITY_DN95663_c1_g1_m.29446	CSA030618.1
TRINITY_DN96724_c0_g1_m.30959	Cluster-2961.254109								TRINITY_DN95671_c6_g1_m.29456	CSA036932.1
TRINITY_DN96743_c10_g1_m.30998	Cluster-2961.158517								TRINITY_DN95718_c2_g1_m.29516	CSA033283.1
TRINITY_DN96746_c0_g1_m.31010	Cluster-2961.119615								TRINITY_DN95754_c1_g3_m.29565	CSA009319.1
TRINITY_DN96759_c4_g1_m.31020	Cluster-2961.187851								TRINITY_DN95774_c0_g1_m.29589	CSA011778.1
TRINITY_DN96823_c0_g1_m.31121	Cluster-2961.145294								TRINITY_DN95820_c0_g1_m.29646	CSA028506.1
TRINITY_DN96832_c0_g2_m.31128	Cluster-2961.232118								TRINITY_DN95827_c0_g1_m.29657	CSA017933.1
TRINITY_DN96849_c0_g1_m.31154	Cluster-2961.161012								TRINITY_DN95870_c0_g1_m.29707	CSA024818.1
TRINITY_DN96884_c0_g1_m.31191	Cluster-2961.147668								TRINITY_DN95897_c0_g1_m.29749	CSA007940.1
TRINITY_DN97006_c0_g1_m.31350	Cluster-2961.140296								TRINITY_DN95913_c0_g6_m.29779	CSA020590.1
TRINITY_DN97037_c0_g1_m.31388	Cluster-2961.149043								TRINITY_DN95953_c0_g1_m.29835	CSA020590.1
TRINITY_DN97066_c1_g1_m.31437	Cluster-2961.112357								TRINITY_DN95962_c0_g1_m.29847	CSA000918.1
TRINITY_DN97115_c1_g1_m.31530	Cluster-2961.154826								TRINITY_DN95980_c0_g1_m.29875	CSA029655.1
TRINITY_DN97149_c0_g1_m.31576	Cluster-2961.158035								TRINITY_DN96023_c0_g1_m.29948	CSA034037.1
TRINITY_DN97187_c0_g1_m.31637	Cluster-2961.217832								TRINITY_DN96034_c0_g1_m.29959	CSA005059.1
TRINITY_DN97208_c0_g2_m.31666	Cluster-2961.77203								TRINITY_DN96051_c0_g1_m.29985	CSA003118.1
TRINITY_DN97239_c2_g1_m.31720	Cluster-2961.216242								TRINITY_DN96100_c4_g23_m.30033	CSA031288.1
TRINITY_DN97250_c0_g1_m.31741	Cluster-2961.174383								TRINITY_DN96106_c0_g1_m.30040	CSA025287.1
TRINITY_DN97282_c0_g1_m.31786	Cluster-2961.133994								TRINITY_DN96113_c0_g1_m.30053	CSA034848.1
TRINITY_DN97332_c1_g1_m.31858	Cluster-2961.156656								TRINITY_DN96114_c0_g1_m.30054	CSA031469.1
TRINITY_DN97347_c0_g1_m.31886	Cluster-2961.165939								TRINITY_DN96131_c0_g1_m.30083	CSA011817.1
TRINITY_DN97379_c1_g1_m.31931	Cluster-2961.179280								TRINITY_DN96142_c2_g1_m.30101	CSA035939.1
TRINITY_DN97400_c1_g1_m.31973	Cluster-2961.166927								TRINITY_DN96151_c0_g1_m.30119	CSA014616.1
TRINITY_DN97400_c1_g2_m.31974	Cluster-2961.166927								TRINITY_DN96203_c0_g1_m.30200	CSA002579.1
TRINITY_DN97425_c0_g1_m.31997	Cluster-2961.130566								TRINITY_DN96225_c0_g2_m.30239	CSA017546.1
TRINITY_DN97433_c4_g4_m.32011	Cluster-2961.149670								TRINITY_DN96239_c1_g1_m.30258	CSA001605.1
TRINITY_DN97459_c0_g1_m.32055	Cluster-2961.172657								TRINITY_DN96242_c0_g1_m.30262	CSA016111.1
TRINITY_DN97480_c1_g1_m.32093	Cluster-2961.293290								TRINITY_DN96254_c0_g2_m.30286	CSA036357.1
TRINITY_DN97521_c0_g3_m.32153	Cluster-2961.165302								TRINITY_DN96287_c0_g1_m.30344	CSA035207.1
TRINITY_DN97530_c0_g2_m.32166	Cluster-2961.285540								TRINITY_DN96293_c0_g1_m.30347	CSA022045.1
TRINITY_DN97560_c0_g2_m.32208	Cluster-2961.282875								TRINITY_DN96337_c0_g1_m.30405	CSA029975.1
TRINITY_DN97563_c0_g1_m.32213	Cluster-2961.161012								TRINITY_DN96346_c5_g8_m.30421	CSA016078.1
TRINITY_DN97572_c0_g1_m.32224	Cluster-2961.97100								TRINITY_DN96355_c0_g1_m.30430	CSA001357.1
TRINITY_DN97585_c0_g1_m.32246	Cluster-2961.222659								TRINITY_DN96387_c0_g1_m.30470	CSA000407.1
TRINITY_DN97660_c0_g1_m.32349	Cluster-2961.129162								TRINITY_DN96393_c0_g2_m.30479	CSA019480.1
TRINITY_DN97723_c3_g1_m.32443	Cluster-2961.147951								TRINITY_DN96401_c2_g1_m.30490	CSA034432.1
TRINITY_DN97737_c0_g1_m.32460	Cluster-32799.0								TRINITY_DN96411_c0_g1_m.30511	CSA008732.1
TRINITY_DN97743_c1_g1_m.32474	Cluster-2961.156152								TRINITY_DN96413_c0_g1_m.30512	CSA010083.1
TRINITY_DN97745_c0_g1_m.32480	Cluster-2961.119559								TRINITY_DN96487_c0_g1_m.30615	CSA020777.1
TRINITY_DN97757_c0_g1_m.32505	Cluster-2961.188693								TRINITY_DN96494_c0_g1_m.30626	CSA016853.1
TRINITY_DN97788_c0_g2_m.32544	Cluster-2961.156152								TRINITY_DN96496_c1_g2_m.30631	CSA025186.1
TRINITY_DN97789_c2_g1_m.32547	Cluster-2961.254109								TRINITY_DN96498_c0_g1_m.30632	CSA011184.1
TRINITY_DN97804_c0_g11_m.32567	Cluster-2961.178928								TRINITY_DN96503_c0_g1_m.30642	CSA016269.1
TRINITY_DN97804_c0_g7_m.32570	Cluster-2961.164145								TRINITY_DN96518_c1_g6_m.30664	CSA025333.1
TRINITY_DN97804_c0_g9_m.32572	Cluster-2961.164145								TRINITY_DN96602_c2_g1_m.30796	CSA021512.1
TRINITY_DN97819_c0_g2_m.32596	Cluster-2961.188693								TRINITY_DN96606_c0_g1_m.30799	CSA017477.1
TRINITY_DN97835_c0_g1_m.32618	Cluster-2961.154826								TRINITY_DN96613_c0_g1_m.30808	CSA033746.1
TRINITY_DN97843_c0_g1_m.32632	Cluster-12852.0								TRINITY_DN96615_c1_g1_m.30811	CSA007682.1
TRINITY_DN97853_c1_g1_m.32652	Cluster-2961.147631								TRINITY_DN96658_c0_g1_m.30872	CSA011032.1
TRINITY_DN97892_c0_g1_m.32711	Cluster-2961.112453								TRINITY_DN96669_c1_g1_m.30885	CSA034492.1
TRINITY_DN97928_c0_g1_m.32775	Cluster-2961.47359								TRINITY_DN96724_c0_g1_m.30959	CSA025704.1
TRINITY_DN98013_c0_g1_m.32917	Cluster-2961.115647								TRINITY_DN96734_c0_g1_m.30982	CSA021331.1
TRINITY_DN98020_c0_g1_m.32928	Cluster-2961.155210								TRINITY_DN96759_c4_g1_m.31020	CSA004619.1
TRINITY_DN98032_c0_g2_m.32943	Cluster-2961.146290								TRINITY_DN96823_c0_g1_m.31121	CSA030116.1
TRINITY_DN98036_c1_g1_m.32952	Cluster-2961.122808								TRINITY_DN96832_c0_g2_m.31128	CSA005087.1
TRINITY_DN98057_c1_g1_m.32975	Cluster-2961.165299								TRINITY_DN96841_c0_g1_m.31142	CSA018083.1
TRINITY_DN98063_c0_g1_m.32987	Cluster-2961.153270								TRINITY_DN96873_c0_g1_m.31179	CSA025676.1
TRINITY_DN98076_c0_g2_m.33010	Cluster-37717.0								TRINITY_DN96884_c0_g1_m.31191	CSA035207.1
TRINITY_DN98089_c1_g3_m.33031	Cluster-2961.112387								TRINITY_DN96886_c1_g1_m.31194	CSA017891.1
TRINITY_DN98089_c1_g3_m.33032	Cluster-2961.112387								TRINITY_DN96963_c0_g1_m.31284	CSA016826.1
TRINITY_DN98108_c0_g1_m.33064	Cluster-2961.149243								TRINITY_DN96964_c0_g1_m.31287	CSA027685.1
TRINITY_DN98164_c0_g1_m.33135	Cluster-2961.193573								TRINITY_DN97006_c0_g1_m.31350	CSA015454.1
TRINITY_DN98189_c4_g7_m.33165	Cluster-2961.132647								TRINITY_DN97037_c0_g1_m.31388	CSA015476.1
TRINITY_DN98215_c3_g14_m.33205	Cluster-2961.164192								TRINITY_DN97057_c0_g1_m.31419	CSA012958.1
TRINITY_DN98215_c3_g18_m.33206	Cluster-2961.120785								TRINITY_DN97066_c1_g1_m.31437	CSA032885.1
TRINITY_DN98215_c3_g19_m.33207	Cluster-2961.120785								TRINITY_DN97091_c0_g2_m.31488	CSA010284.1
TRINITY_DN98215_c3_g2_m.33208	Cluster-2961.164192								TRINITY_DN97149_c0_g1_m.31576	CSA009283.1
TRINITY_DN98215_c3_g8_m.33210	Cluster-2961.120785								TRINITY_DN97154_c0_g1_m.31582	CSA023536.1
TRINITY_DN98282_c0_g1_m.33347	Cluster-2961.112038								TRINITY_DN97200_c0_g1_m.31660	CSA015875.1
TRINITY_DN98352_c0_g1_m.33477	Cluster-2961.155563								TRINITY_DN97208_c0_g2_m.31666	CSA017525.1
TRINITY_DN98358_c0_g1_m.33487	Cluster-2961.87445								TRINITY_DN97235_c0_g2_m.31711	CSA000133.1
TRINITY_DN98360_c0_g2_m.33491	Cluster-2961.115647								TRINITY_DN97239_c2_g1_m.31720	CSA033083.1
TRINITY_DN98362_c0_g1_m.33493	Cluster-2961.156588								TRINITY_DN97250_c0_g1_m.31741	CSA001605.1
TRINITY_DN98368_c0_g1_m.33510	Cluster-2961.164690								TRINITY_DN97288_c0_g1_m.31794	CSA009720.1
TRINITY_DN98385_c0_g1_m.33538	Cluster-2961.166728								TRINITY_DN97347_c0_g1_m.31886	CSA014396.1
TRINITY_DN98386_c0_g1_m.33539	Cluster-2961.176839								TRINITY_DN97400_c1_g1_m.31973	CSA006957.1
TRINITY_DN98391_c0_g1_m.33545	Cluster-2961.129856								TRINITY_DN97400_c1_g2_m.31974	CSA006957.1
TRINITY_DN98401_c1_g1_m.33568	Cluster-2961.119615								TRINITY_DN97425_c0_g1_m.31997	CSA016186.1
TRINITY_DN98402_c0_g1_m.33569	Cluster-2961.147789								TRINITY_DN97426_c0_g3_m.31998	CSA004837.1
TRINITY_DN98412_c0_g1_m.33585	Cluster-2961.154534								TRINITY_DN97433_c4_g4_m.32011	CSA013337.1
TRINITY_DN98441_c0_g1_m.33625	Cluster-2961.153705								TRINITY_DN97459_c0_g1_m.32055	CSA011739.1
TRINITY_DN98473_c0_g2_m.33674	Cluster-2961.92093								TRINITY_DN97521_c0_g3_m.32153	CSA027096.1
TRINITY_DN98523_c1_g3_m.33732	Cluster-2961.143434								TRINITY_DN97585_c0_g1_m.32246	CSA028037.1
TRINITY_DN98545_c0_g1_m.33770	Cluster-2961.161012								TRINITY_DN97637_c0_g1_m.32320	CSA006537.1
TRINITY_DN98576_c1_g1_m.33819	Cluster-2961.77113								TRINITY_DN97646_c1_g1_m.32332	CSA008510.1
TRINITY_DN98620_c0_g3_m.33880	Cluster-2961.161857								TRINITY_DN97660_c0_g1_m.32349	CSA005189.1
TRINITY_DN98681_c0_g1_m.33978	Cluster-2961.154534								TRINITY_DN97668_c1_g1_m.32359	CSA035317.1
TRINITY_DN98702_c0_g1_m.34011	Cluster-2961.97100								TRINITY_DN97723_c3_g1_m.32443	CSA035408.1
TRINITY_DN98713_c0_g2_m.34024	Cluster-2961.187492								TRINITY_DN97743_c1_g1_m.32474	CSA007815.1
TRINITY_DN98718_c0_g1_m.34036	Cluster-2961.138384								TRINITY_DN97745_c0_g1_m.32480	CSA009889.1
TRINITY_DN98799_c0_g1_m.34171	Cluster-2961.139450								TRINITY_DN97757_c0_g1_m.32505	CSA002335.1
TRINITY_DN98874_c1_g1_m.34289	Cluster-2961.137733								TRINITY_DN97788_c0_g2_m.32544	CSA007815.1
TRINITY_DN98876_c1_g1_m.34294	Cluster-2961.207437								TRINITY_DN97789_c2_g1_m.32547	CSA025704.1
TRINITY_DN98907_c1_g2_m.34338	Cluster-2961.165106								TRINITY_DN97804_c0_g11_m.32567	CSA036209.1
TRINITY_DN98912_c0_g1_m.34347	Cluster-2961.142863								TRINITY_DN97804_c0_g7_m.32570	CSA036209.1
TRINITY_DN98958_c0_g1_m.34422	Cluster-2961.156621								TRINITY_DN97804_c0_g9_m.32572	CSA036209.1
TRINITY_DN99001_c0_g1_m.34516	Cluster-2961.118397								TRINITY_DN97819_c0_g2_m.32596	CSA002602.1
TRINITY_DN99003_c1_g1_m.34518	Cluster-2961.117482								TRINITY_DN97835_c0_g1_m.32618	CSA032456.1
TRINITY_DN99012_c0_g1_m.34527	Cluster-2961.262286								TRINITY_DN97843_c0_g1_m.32632	CSA012291.1
TRINITY_DN99022_c2_g1_m.34540	Cluster-2961.159613								TRINITY_DN97853_c1_g1_m.32652	CSA023182.1
TRINITY_DN99063_c1_g1_m.34602	Cluster-2961.158213								TRINITY_DN97854_c0_g2_m.32654	CSA003733.1
TRINITY_DN99066_c0_g1_m.34606	Cluster-2961.282875								TRINITY_DN97862_c2_g1_m.32668	CSA034656.1
TRINITY_DN99096_c0_g1_m.34648	Cluster-2961.148138								TRINITY_DN97892_c0_g1_m.32711	CSA015506.1
TRINITY_DN99100_c0_g1_m.34657	Cluster-2961.202872								TRINITY_DN97922_c1_g1_m.32767	CSA011006.1
TRINITY_DN99103_c0_g1_m.34662	Cluster-2961.156152								TRINITY_DN97928_c0_g1_m.32775	CSA013844.1
TRINITY_DN99117_c0_g1_m.34685	Cluster-2961.126749								TRINITY_DN97942_c0_g1_m.32801	CSA030516.1
TRINITY_DN99195_c0_g1_m.34816	Cluster-2961.29969								TRINITY_DN97960_c0_g1_m.32844	CSA025587.1
TRINITY_DN99201_c0_g1_m.34828	Cluster-2961.222659								TRINITY_DN98000_c1_g1_m.32899	CSA028548.1
TRINITY_DN99214_c1_g1_m.34851	Cluster-2961.165939								TRINITY_DN98013_c0_g1_m.32917	CSA028952.1
TRINITY_DN99241_c0_g1_m.34895	Cluster-2961.219676								TRINITY_DN98020_c0_g1_m.32928	CSA019962.1
TRINITY_DN99285_c0_g1_m.34979	Cluster-2961.217987								TRINITY_DN98032_c0_g2_m.32943	CSA008855.1
TRINITY_DN99287_c1_g1_m.34983	Cluster-2961.153560								TRINITY_DN98057_c1_g1_m.32975	CSA018288.1
TRINITY_DN99292_c0_g1_m.34995	Cluster-2961.155068								TRINITY_DN98076_c0_g2_m.33010	CSA010760.1
TRINITY_DN99340_c0_g1_m.35080	Cluster-2961.150114								TRINITY_DN98089_c1_g3_m.33031	CSA002549.1
TRINITY_DN99359_c1_g2_m.35121	Cluster-2961.156876								TRINITY_DN98089_c1_g3_m.33032	CSA002549.1
TRINITY_DN99381_c0_g1_m.35150	Cluster-2961.154733								TRINITY_DN98107_c0_g1_m.33063	CSA023676.1
TRINITY_DN99426_c0_g1_m.35224	Cluster-2961.103954								TRINITY_DN98164_c0_g1_m.33135	CSA028748.1
TRINITY_DN99454_c0_g1_m.35255	Cluster-2961.174422								TRINITY_DN98211_c0_g6_m.33200	CSA013702.1
TRINITY_DN99492_c0_g1_m.35317	Cluster-2961.174652								TRINITY_DN98215_c3_g14_m.33205	CSA026350.1
TRINITY_DN99516_c1_g1_m.35350	Cluster-2961.92093								TRINITY_DN98215_c3_g18_m.33206	CSA026350.1
TRINITY_DN99526_c1_g1_m.35368	Cluster-2961.148155								TRINITY_DN98215_c3_g19_m.33207	CSA026350.1
TRINITY_DN99566_c0_g1_m.35422	Cluster-2961.184360								TRINITY_DN98215_c3_g2_m.33208	CSA026350.1
TRINITY_DN99573_c0_g2_m.35432	Cluster-2961.29969								TRINITY_DN98215_c3_g8_m.33210	CSA026350.1
TRINITY_DN99600_c0_g1_m.35483	Cluster-2961.150548								TRINITY_DN98282_c0_g1_m.33347	CSA033796.1
TRINITY_DN99603_c0_g2_m.35487	Cluster-2961.155416								TRINITY_DN98355_c3_g1_m.33480	CSA036135.1
TRINITY_DN99633_c2_g5_m.35546	Cluster-2961.188693								TRINITY_DN98360_c0_g2_m.33491	CSA001379.1
TRINITY_DN99650_c0_g1_m.35583	Cluster-2961.163635								TRINITY_DN98368_c0_g1_m.33510	CSA000918.1
TRINITY_DN99653_c2_g1_m.35593	Cluster-2961.140436								TRINITY_DN98385_c0_g1_m.33538	CSA002354.1
TRINITY_DN99664_c2_g1_m.35601	Cluster-2961.266907								TRINITY_DN98386_c0_g1_m.33539	CSA016043.1
TRINITY_DN99674_c0_g1_m.35626	Cluster-2961.149954								TRINITY_DN98391_c0_g1_m.33545	CSA021639.1
TRINITY_DN99674_c1_g3_m.35628	Cluster-2961.258637								TRINITY_DN98402_c0_g1_m.33569	CSA019160.1
TRINITY_DN99674_c2_g1_m.35629	Cluster-2961.149954								TRINITY_DN98412_c0_g1_m.33585	CSA035327.1
TRINITY_DN99677_c0_g1_m.35631	Cluster-2961.200809								TRINITY_DN98473_c0_g2_m.33674	CSA013547.1
TRINITY_DN99699_c0_g1_m.35664	Cluster-2961.153199								TRINITY_DN98485_c0_g1_m.33682	CSA004504.1
TRINITY_DN99710_c0_g1_m.35681	Cluster-2961.220995								TRINITY_DN98485_c0_g1_m.33683	CSA004504.1
TRINITY_DN99722_c5_g1_m.35696	Cluster-2961.137733								TRINITY_DN98523_c1_g3_m.33732	CSA010265.1
TRINITY_DN99722_c6_g1_m.35700	Cluster-2961.197549								TRINITY_DN98557_c0_g1_m.33797	CSA001757.1
TRINITY_DN99755_c0_g1_m.35750	Cluster-2961.207437								TRINITY_DN98576_c1_g1_m.33819	CSA031752.1
TRINITY_DN99774_c0_g1_m.35783	Cluster-2961.83494								TRINITY_DN98592_c1_g2_m.33846	CSA028248.1
TRINITY_DN99783_c0_g1_m.35802	Cluster-2961.149976								TRINITY_DN98678_c0_g1_m.33973	CSA013904.1
TRINITY_DN99785_c0_g2_m.35803	Cluster-2961.123725								TRINITY_DN98681_c0_g1_m.33978	CSA035327.1
TRINITY_DN99793_c2_g1_m.35818	Cluster-2961.158547								TRINITY_DN98713_c0_g2_m.34024	CSA031106.1
TRINITY_DN99808_c1_g1_m.35853	Cluster-2961.126325								TRINITY_DN98718_c0_g1_m.34036	CSA021191.1
TRINITY_DN99827_c1_g2_m.35883	Cluster-2961.66657								TRINITY_DN98790_c1_g1_m.34158	CSA000931.1
TRINITY_DN99844_c0_g1_m.35916	Cluster-2961.193573								TRINITY_DN98799_c0_g1_m.34171	CSA005551.1
TRINITY_DN99946_c0_g1_m.36092	Cluster-2961.161012								TRINITY_DN98809_c0_g1_m.34192	CSA023147.1
TRINITY_DN99970_c0_g3_m.36146	Cluster-2961.97100								TRINITY_DN98876_c1_g1_m.34294	CSA012136.1
									TRINITY_DN98907_c1_g2_m.34338	CSA028646.1
									TRINITY_DN98912_c0_g1_m.34347	CSA025496.1
									TRINITY_DN98958_c0_g1_m.34422	CSA031438.1
									TRINITY_DN99003_c1_g1_m.34518	CSA021853.1
									TRINITY_DN99009_c0_g1_m.34525	CSA001818.1
									TRINITY_DN99063_c1_g1_m.34602	CSA034127.1
									TRINITY_DN99066_c0_g1_m.34606	CSA023501.1
									TRINITY_DN99087_c5_g1_m.34634	CSA003143.1
									TRINITY_DN99096_c0_g1_m.34648	CSA031519.1
									TRINITY_DN99100_c0_g1_m.34657	CSA034838.1
									TRINITY_DN99103_c0_g1_m.34662	CSA007815.1
									TRINITY_DN99175_c0_g1_m.34779	CSA020107.1
									TRINITY_DN99195_c0_g1_m.34816	CSA002537.1
									TRINITY_DN99201_c0_g1_m.34828	CSA028643.1
									TRINITY_DN99241_c0_g1_m.34895	CSA025443.1
									TRINITY_DN99283_c0_g1_m.34976	CSA035826.1
									TRINITY_DN99292_c0_g1_m.34995	CSA028496.1
									TRINITY_DN99359_c1_g2_m.35121	CSA015989.1
									TRINITY_DN99397_c1_g2_m.35183	CSA035141.1
									TRINITY_DN99487_c1_g1_m.35309	CSA010961.1
									TRINITY_DN99505_c0_g1_m.35334	CSA009388.1
									TRINITY_DN99516_c1_g1_m.35350	CSA013547.1
									TRINITY_DN99526_c1_g1_m.35368	CSA018950.1
									TRINITY_DN99566_c0_g1_m.35422	CSA022412.1
									TRINITY_DN99573_c0_g2_m.35432	CSA006518.1
									TRINITY_DN99583_c0_g1_m.35454	CSA034422.1
									TRINITY_DN99603_c0_g2_m.35487	CSA010160.1
									TRINITY_DN99606_c0_g1_m.35495	CSA031536.1
									TRINITY_DN99618_c1_g1_m.35517	CSA022661.1
									TRINITY_DN99633_c2_g5_m.35546	CSA002335.1
									TRINITY_DN99642_c0_g1_m.35567	CSA031575.1
									TRINITY_DN99650_c0_g1_m.35583	CSA008740.1
									TRINITY_DN99674_c0_g1_m.35626	CSA000963.1
									TRINITY_DN99674_c1_g3_m.35628	CSA016462.1
									TRINITY_DN99674_c2_g1_m.35629	CSA016462.1
									TRINITY_DN99677_c0_g1_m.35631	CSA010616.1
									TRINITY_DN99699_c0_g1_m.35664	CSA002108.1
									TRINITY_DN99722_c6_g1_m.35700	CSA002400.1
									TRINITY_DN99755_c0_g1_m.35750	CSA034775.1
									TRINITY_DN99793_c2_g1_m.35818	CSA032793.1
									TRINITY_DN99808_c1_g1_m.35853	CSA035706.1
									TRINITY_DN99844_c0_g1_m.35916	CSA024339.1
									TRINITY_DN99904_c0_g1_m.36020	CSA029626.1
									TRINITY_DN99920_c0_g1_m.36052	CSA005110.1
									TRINITY_DN99936_c1_g1_m.36071	CSA023297.1
									TRINITY_DN99942_c1_g2_m.36084	CSA015870.1

## Sheet: conserved motifs
Species	Motif Logo	Number of sites
Dendrobium huoshanense	..........KE.........	555
Dendrobium huoshanense	...K...E..K..........	81
Dendrobium huoshanense	.........AK..........	430
Dendrobium huoshanense	..........KD.........	334
Dendrobium huoshanense	..........KA.........	384
Dendrobium huoshanense	.K........K..........	303
Dendrobium huoshanense	..........KV.........	302
Dendrobium huoshanense	..........KG.........	275
Dendrobium huoshanense	.........VK..........	196
Dendrobium huoshanense	..........K....E.....	191
Dendrobium huoshanense	.........YK..........	80
Camellia sinensis	.........EK......K…	62
Camellia sinensis	...K......KE.........	51
Camellia sinensis	........A.KK.........	42
Camellia sinensis	.........EK..........	262
Camellia sinensis	....K.....KE.........	41
Camellia sinensis	..........KD.....K...	32
Camellia sinensis	..........K....K.....	208
Camellia sinensis	..........KD.........	157
Camellia sinensis	..........K......K...	175
Camellia sinensis	.........AK..........	147
Camellia sinensis	..........KE.........	127
Camellia sinensis	..........K.....K....	112
Camellia sinensis	K.........K..........	98
Camellia sinensis	...K......K..........	84
Camellia sinensis	.K........K..........	74
Oryza sativa	..........K.V........	182
Oryza sativa	..........K...E......	72
Oryza sativa	..........K.L........	218
Oryza sativa	.........EK..........	100
Oryza sativa	..........KE.........	53
Oryza sativa	..........K.I........	150
Oryza sativa	..........KD.........	87
Oryza sativa	.........DK..........	69
Oryza sativa	.K........K..........	54
Carica papaya	.....K...EK..........	144
Carica papaya	..........KE...K.....	131
Carica papaya	.........EKG.........	75
Carica papaya	..........KE..K......	104
Carica papaya	.........EK..........	618
Carica papaya	..........KD.........	544
Carica papaya	..........KE......K..	87
Carica papaya	...K.....FK..........	42
Carica papaya	..........KE.........	442
Carica papaya	..........K....K.....	411
Carica papaya	..........K.....K....	356
Carica papaya	.........YK..........	182
Carica papaya	.........FK.......K..	33
Carica papaya	.........AK..........	310
Carica papaya	.........GKV.........	54
Carica papaya	..........K......K...	257
Carica papaya	.........FK....R.....	23
Carica papaya	.........DK..........	183
Carica papaya	...K......K..........	193
Carica papaya	.K........K..........	168
Carica papaya	.........FK..........	102
Carica papaya	..........KG.........	149
Carica papaya	..........KV.....R...	24
Carica papaya	.........NK..........	109
Carica papaya	..........K..D.......	100
Carica papaya	.........GK..........	145
Nicotiana tabacum	..........KE.........	302
Nicotiana tabacum	.........EK..........	258
Nicotiana tabacum	..........KD.........	190
Nicotiana tabacum	.........YK..........	91
Nicotiana tabacum	.........AK..........	164
Nicotiana tabacum	.........DK..........	112
Nicotiana tabacum	.........FK..........	87
Nicotiana tabacum	.........GK..........	127
Nicotiana tabacum	..........K..E.......	85
